# Supplementary material for: Cohesin-dependence of neuronal gene expression relates to chromatin loop length
Source: eLife. 2022 Apr 26;11:e76539. doi: 10.7554/eLife.76539 (PMC9106336; doi:10.7554/eLife.76539)
Supplement: Figure 1—source data 1. [file elife-76539-fig1-data1.xlsx]

## Sheet: Figure 1a,c
Immunofluorescence analysis
% of cells
Figure 1a
	GFAP+ cells						IBA1+ cells								MAP2+ cells
Rad21+/+ NexCre	0.916267	0.665761	0.549394				0.011513	0.00709564	0.0176425	0.00227583	0	0.00927865			98.2019	99.2424	100
Rad21lox/lox NexCre	0.954477	0.69194	0.815364	0.728315	0.944948	0.649795	0.0143211	0.0366375	0.0157628	0.00765867	0.0295561	0.011429	0	0.00575651	99.1329	98.9011	96.9802
Figure 1c
	RAD21+GAD67-						RAD21+GAD67+						RAD21-GAD67-						RAD21-GAD67+
Rad21+/+ NexCre	69.7	75.84	78.86	0	0	0	27.273	20.1342	15.4185	0	0	0	3.0273	4.0258	5.7215	0	0	0	0.03	0	0	0	0	0
Rad21lox/lox NexCre	3.17	4.84	3.03	3.51	0	0.36	23.529	18.75	22.078	15.205	12.821	19.1489	73.3006	76.41	74.8921	81.2853	87.1795	80.4911	0.04	0	0.06	0.06	0.06	0

## Sheet: Figure 1b
Immunofluorescence analysis
Integrated intensity of RAD21 staining in the nucleus
Rad21+/+ NexCre				Rad21lox/lox NexCre
ImageNumber	ObjectNumber	Intensity_IntegratedIntensity_C4_RAD21		ImageNumber	ObjectNumber	Intensity_IntegratedIntensity_C4_RAD21
72	1	761205		77	1	700420
72	3	729506		77	2	110504
72	4	639812		77	3	169615
72	5	698550		77	4	136528
72	6	597727		77	6	98794
72	7	475763		77	7	131421
72	8	707893		77	8	119351
72	9	785425		77	10	128661
72	10	463723		77	11	134041
72	11	741574		77	12	495457
72	13	611272		77	14	133621
72	14	1026290		77	15	127671
73	1	665581		77	16	121752
73	2	921635		77	17	135330
73	3	764512		77	18	118109
73	4	887931		77	20	117182
73	5	650770		77	21	121153
73	6	713211		77	22	100242
73	7	656081		78	1	226105
73	8	593012		78	2	820940
73	9	848138		78	3	197579
73	10	625751		78	4	288016
73	11	723720		78	5	907198
73	12	522574		78	6	212645
73	13	545585		78	7	208367
73	14	656559		78	8	170214
73	15	797063		78	9	213000
73	16	726184		78	10	260374
73	17	674501		78	11	195962
73	18	891988		78	12	256564
74	2	957522		78	13	824805
74	3	781457		78	14	188482
74	4	617064		78	15	130589
74	5	990144		78	16	116216
74	6	961659		78	17	231052
74	7	900858		78	18	187327
74	9	788485		79	1	173633
74	11	970635		79	2	206564
74	12	1093830		79	3	265819
74	13	708691		79	4	187804
74	14	855027		79	5	246458
74	15	834564		79	6	823650
74	16	778488		79	7	193105
74	17	591850		79	8	134061
74	19	822174		79	9	125355
75	1	765569		79	10	264262
75	2	656372		79	11	201864
75	3	1063314		79	12	183186
75	4	1112967		79	13	614881
75	5	1225829		79	14	217561
75	6	1032823		79	15	152124
75	7	969699		80	1	207181
75	8	771877		80	2	241583
75	9	792125		80	3	255642
75	10	950965		80	4	232948
75	11	1001562		80	5	222173
75	13	842512		80	6	181045
75	14	1057315		80	7	231569
75	15	1147737		80	8	231261
75	16	853603		80	9	174671
75	17	713263		80	10	199682
75	20	1017616		80	11	180609
75	22	1145241		80	12	202143
75	23	694003		80	13	161282
75	24	1116326		80	14	196517
75	25	892413		80	15	202708
75	26	1149229		80	16	194577
75	27	1039338		80	17	191004
75	28	1073351		80	18	153034
75	29	1121616		81	1	200729
75	30	880763		81	2	169441
76	1	816674		81	3	746972
76	2	726059		81	4	229151
76	3	973074		81	5	195448
76	4	731776		81	6	238311
76	5	992220		81	7	214673
76	6	954596		81	8	205049
76	7	833279		81	10	288586
76	8	834068		81	11	205072
76	10	1107687		81	12	256930
76	11	999639		81	13	209995
76	12	922445		81	14	187427
76	13	873275		81	15	170849
76	14	707423		81	16	174648
76	15	770583		81	17	185048
76	16	955086		81	18	681534
76	17	1285141		81	19	173025
76	18	878550		82	1	170126
76	19	932051		82	2	179629
76	20	1000927		82	3	953433
76	21	932105		82	4	272984
76	22	680054		82	5	174579
				82	6	199809
				82	7	245259
				82	8	206093
				82	9	196241
				82	10	148177
				82	11	144312
				82	12	789072
				82	13	223279
				82	14	171977
				82	15	210693
				82	16	202540
				82	17	208525
				82	18	129954
				82	19	1197801
				82	20	182463
				82	21	214125

## Sheet: Figure 1d
Figure 1d
RT-qPCR
Rad21 mRNA relative expression to Ubc and Hprt and to Rad21+/+ NexCre
	Rad21+/+ NexCre												Rad21lox/lox NexCre
Rad21 mRNA	1.13208	1.05694	0.8603	0.964292	1.20442	1.04749	0.888661	0.964292	1.05694	0.8603	0.964292		0.237578	0.247667	0.184792	0.226718	0.329071	0.239645	0.166833	0.198743	0.326798	0.334824	0.305443	0.324541	0.174521	0.237167	0.19499	0.296851	0.2458	0.166388
WB analysis
RAD21 protein relative expression to LaminB and to Rad21+/+ NexCre
	Rad21+/+ NexCre						Rad21lox/lox NexCre
RAD21 Protein	1	1	0.938365	1.06164			0.228481	0.242566	0.18754	0.227441	0.262953	0.237507
RiboTag
	Rad21+/+ NexCre			Rad21lox/lox NexCre
Rad21 mRNA	0.825243	1.15936	1.0154	0.0140461	0.0140461	0.0140461

## Sheet: Figure 1e
C TCF loop	replicate	wild-type	Rad21lox/lox
1	1	260.86	183.145
	2	278.09	200.72
		wild-type	Rad21lox/lox
2	1	326.38	162.79
	2	350.04	226.52
		wild-type	Rad21lox/lox
3	1	363.79	189.79
	2	391.74	264.25
		wild-type	Rad21lox/lox
4	1	445.1	218.01
	2	443	267.8

## Sheet: Supp Fig1
Figure 1 - figure supplement 1
Rad21+/+ NexCre RiboTag versus standard RNA-seq in Rad21+/+ NexCre neurons.
	enrichment (log10)
Slc17a7	0.373675
Camk2a	0.442881
Gad1	-1.88783
Gad2	-1.76844
Slc32a1	-1.48385
Gfap	-2.16835
Aqp4	-2.42096
Mlc1	-2.62499
Aif1	-0.442795
