# Supplementary material for: Cohesin-dependence of neuronal gene expression relates to chromatin loop length
Source: eLife. 2022 Apr 26;11:e76539. doi: 10.7554/eLife.76539 (PMC9106336; doi:10.7554/eLife.76539)
Supplement: Figure 2—source data 1. [file elife-76539-fig2-data1.xlsx]

## Sheet: Sheet1
Fig2a see Supplementary File 1
Fig2b see Supplementary File 3
