# Supplementary material for: Cohesin-dependence of neuronal gene expression relates to chromatin loop length
Source: eLife. 2022 Apr 26;11:e76539. doi: 10.7554/eLife.76539 (PMC9106336; doi:10.7554/eLife.76539)
Supplement: Figure 3—source data 1. [file elife-76539-fig3-data1.xlsx]

## Sheet: Figure 3D
Neuronal morphology analysis
Sholl analysis
	Radius	Rad21+/+ NexCre																																	Rad21lox/lox NexCre
0	0	0	0	0	0	0	0	0	0	0	0	0	0	0	0	0	0	0	0	0	0	0	0	0	0	0	0	0	0	0	0	0	0		0	0	0	0	0	0	0	0	0	0	0	0	0	0	0
5	5	6	6	8	8	7	6	5	6	6	7	6	7	7	5	7	4	5	4	6	5	6	6	9	9	6	8	8	4	7	5	8	6		4	7	5	7	7	7	7	5	6	5	4	7	5	4	5
10	10	6	6	10	8	7	10	7	6	6	7	6	7	7	5	7	4	5	5	9	5	6	6	10	9	10	8	8	4	7	5	8	7		4	7	5	7	7	7	7	5	6	5	4	7	5	4	5
15	15	8	9	13	8	11	9	12	10	8	8	9	10	9	8	9	5	5	6	13	5	6	9	12	13	9	11	9	5	9	8	8	12		8	9	8	7	8	7	8	6	7	5	6	8	7	6	8
20	20	9	11	16	9	14	9	14	11	8	9	16	15	13	8	12	8	6	7	17	7	7	8	15	14	13	14	12	12	13	12	11	14		8	9	10	10	12	7	11	8	10	9	7	9	11	7	10
25	25	14	12	19	13	16	10	20	13	11	11	25	16	14	9	12	9	8	7	16	8	9	9	18	14	14	16	20	12	17	13	11	15		10	9	11	11	14	9	12	9	12	8	10	10	13	7	11
30	30	16	14	21	16	19	12	27	17	12	12	27	18	14	11	13	11	10	7	21	10	9	16	24	16	16	16	19	13	19	13	12	18		11	12	12	12	15	10	15	10	14	9	12	11	17	7	15
35	35	18	14	20	19	20	13	24	21	14	15	28	20	15	10	13	15	11	7	21	12	10	17	28	16	17	16	18	14	19	14	12	18		13	14	13	13	15	11	12	11	14	12	14	15	17	6	16
40	40	20	15	22	20	21	13	26	20	16	17	32	21	14	11	14	16	12	8	19	12	11	21	30	18	17	18	19	15	20	16	14	18		14	13	13	13	16	11	13	11	16	13	13	14	18	9	16
45	45	20	17	25	22	19	13	27	20	18	22	32	21	14	10	16	17	14	10	20	12	11	22	31	19	18	18	19	17	21	17	16	19		15	14	14	13	16	11	15	12	17	14	13	12	18	9	16
50	50	22	18	24	21	20	12	27	20	20	19	30	20	14	14	18	18	17	11	17	12	12	23	33	22	17	17	21	16	21	19	15	21		16	14	14	14	17	12	13	13	19	13	11	13	17	9	16
55	55	21	17	25	23	20	12	28	20	21	19	29	21	15	16	14	20	20	12	16	14	12	25	31	23	15	14	22	16	21	19	16	20		17	15	13	13	18	12	14	14	18	11	10	14	17	9	17
60	60	22	20	28	24	21	13	26	19	22	19	29	20	16	19	12	19	19	13	14	12	12	26	28	24	16	15	23	16	23	18	17	20		17	15	14	14	18	10	14	14	18	11	9	14	17	9	18
65	65	22	19	29	23	20	14	21	17	29	19	30	19	17	18	13	18	20	14	14	13	15	24	28	26	17	17	23	17	21	16	17	23		20	15	14	14	19	10	13	14	18	14	8	14	15	10	17
70	70	20	17	28	22	20	15	22	17	27	20	29	19	14	20	13	17	20	15	14	12	15	22	26	25	17	23	21	17	20	17	17	23		18	16	13	14	19	12	11	16	17	11	7	14	15	11	17
75	75	19	16	27	22	22	16	21	15	25	20	29	21	17	21	12	16	16	14	17	14	16	23	19	24	13	29	21	18	21	17	18	27		21	17	13	15	18	12	12	17	15	11	7	14	14	11	17
80	80	18	17	25	21	21	16	17	15	26	19	25	23	17	21	11	14	12	13	17	11	16	21	17	25	13	23	22	20	21	20	16	28		20	16	11	14	18	12	12	15	15	10	6	14	14	11	15
85	85	19	17	22	21	21	16	15	15	27	20	18	25	15	20	11	13	11	13	21	12	18	19	14	23	14	28	22	21	20	17	17	23		17	15	13	14	18	11	12	14	16	10	6	15	12	10	15
90	90	18	17	22	19	21	16	13	14	25	23	17	26	15	20	13	12	10	15	21	13	13	17	10	21	14	26	22	22	20	16	16	23		16	13	11	14	19	11	12	15	16	10	7	16	12	10	12
95	95	17	16	19	18	20	16	13	12	25	25	17	24	13	21	11	12	10	13	21	13	13	16	8	21	19	30	21	21	20	16	18	23		20	14	11	13	19	11	11	15	17	10	8	15	11	11	12
100	100	17	17	18	18	20	18	14	13	21	28	16	19	11	20	14	10	10	12	22	12	12	17	8	20	16	25	23	22	20	18	17	23		14	12	12	14	19	11	10	15	17	8	7	14	11	12	12
105	105	16	16	19	19	22	17	16	13	17	28	13	21	11	17	12	10	9	10	24	11	13	14	6	23	13	20	26	21	18	18	17	22		13	12	14	13	17	12	10	17	18	8	4	13	10	11	12
110	110	15	16	17	18	22	15	16	11	18	26	12	21	12	16	8	10	8	9	26	10	12	13	6	25	10	19	24	20	17	18	18	21		12	11	14	12	17	12	10	16	18	7	3	13	10	12	12
115	115	15	14	14	14	22	14	14	11	16	29	13	22	12	13	7	11	10	9	21	9	10	12	8	25	10	18	22	20	14	17	17	18		11	12	12	11	17	11	10	16	17	6	3	11	10	11	12
120	120	14	16	14	14	22	16	12	11	17	26	11	24	12	13	4	10	9	10	21	8	8	11	5	27	10	16	19	20	12	17	18	17		9	11	10	10	15	12	10	13	17	6	3	11	10	11	11
125	125	12	15	13	12	17	15	14	11	16	23	9	23	11	12	4	10	9	11	23	8	14	10	5	27	9	13	17	21	12	16	17	17		9	12	10	10	15	11	11	12	17	8	3	11	10	7	11
130	130	13	13	12	12	15	16	15	11	16	20	10	23	11	12	3	10	6	14	23	8	8	11	5	25	7	12	16	21	12	19	19	15		6	10	8	9	15	12	10	10	15	7	4	11	9	6	11
135	135	12	11	11	13	16	16	14	9	15	17	10	20	12	13	3	7	6	14	19	8	8	11	5	23	9	12	16	21	13	20	19	15		4	9	9	9	12	14	11	11	15	6	5	11	8	7	10
140	140	11	12	9	13	18	15	14	9	15	11	8	20	12	14	4	8	6	14	16	7	8	11	6	22	9	12	16	18	15	23	18	15		5	10	8	9	10	14	11	10	14	7	6	9	8	7	9
145	145	11	13	9	12	14	17	13	11	16	11	10	21	10	13	3	7	5	16	15	8	12	11	8	23	8	10	15	16	14	20	15	18		5	8	8	9	9	11	11	9	17	6	6	10	8	6	10
150	150	9	12	10	13	14	16	12	8	14	7	9	18	11	12	3	7	5	13	15	7	12	12	9	24	8	8	13	16	13	22	14	17		3	7	8	9	8	8	11	8	14	5	6	11	7	5	13
155	155	10	11	9	13	13	16	11	7	16	7	8	16	11	13	5	4	4	10	15	8	12	11	9	22	6	8	13	17	12	24	13	15		3	8	7	9	10	9	10	8	12	8	6	9	6	7	11
160	160	9	11	10	10	11	17	11	7	16	6	9	13	11	10	5	4	4	9	13	10	16	11	8	22	7	6	15	16	11	18	11	12		4	9	6	8	10	8	10	7	12	6	6	10	6	7	9
165	165	8	11	9	10	9	18	10	7	15	6	9	12	10	9	4	4	3	8	11	9	18	11	7	19	8	4	15	15	9	17	9	16		4	9	5	8	10	6	9	7	9	6	6	11	6	10	9
170	170	6	12	9	9	9	18	10	6	14	6	10	11	9	6	4	4	3	8	11	9	19	10	7	17	9	4	16	15	9	19	10	16		4	9	4	10	9	4	9	7	9	6	6	10	8	6	8
175	175	5	12	9	8	11	17	10	7	11	6	11	11	7	5	4	4	3	10	8	10	19	10	8	15	8	4	17	16	9	17	9	15		4	9	4	10	8	3	10	7	8	7	6	10	8	4	9
180	180	5	12	10	9	13	15	9	6	8	6	10	13	5	6	7	2	3	10	6	12	18	10	8	15	9	4	16	16	8	18	8	13		3	8	3	10	6	3	7	5	7	7	6	8	8	3	9
185	185	4	10	8	8	13	12	7	6	8	7	9	14	6	8	3	1	3	9	7	11	16	10	7	14	7	3	14	15	8	19	8	9		2	8	2	10	6	3	7	4	6	6	7	6	9	4	9
190	190	3	9	6	8	11	11	7	6	6	2	9	11	6	11	3	1	3	7	4	11	16	9	8	13	6	0	14	13	9	18	7	8		1	8	2	9	7	2	7	4	4	7	6	3	11	4	6
[truncated: 13 more columns]

## Sheet: Figure 3Dii
Neuronal morphology analysis
	Rad21+/+ NexCre																																	Rad21lox/lox NexCre
Filament Length	3174.27	3176.77	3768.75	3727.5	3960.34	3472.99	3887.92	2950.94	4050.88	3686.23	3966.56	4205.06	2860.72	3634.78	2232.28	2359.42	2213.44	2612.65	4258.93	2897.02	3552.5	3719.62	3845.54	5190.29	2914.31	3575.04	4316.09	3827.47	3306.47	4383.97	3216.58	4183.49		2292.57	2723.11	2139.25	2437.05	3088.03	2435.97	2798.31	2589.78	3190.82	2085.93	1919.26	2766.39	2766.74	1955.91	2884.06	3987.76
No Dendrite Terminal Points	34	41	45	37	44	39	59	35	52	48	53	72	35	42	34	38	32	30	71	38	44	38	58	61	46	52	51	33	37	60	33	54		40	30	29	28	31	32	39	24	37	32	30	33	29	22	27	48
No Dendrite Branch Points	28	35	37	29	37	35	54	29	46	41	47	65	28	37	27	34	27	27	65	35	38	32	49	52	40	44	43	29	30	55	25	48		36	23	24	21	24	25	32	19	31	27	26	26	24	18	23	43
	Rad21+/+ NexCre										Rad21lox/lox NexCre
Number of spines per 10 µm	8.75955	7.63856	10.5132	10.8119	8.61595	9.68775	11.6721	7.77878	7.22112	10.3805	7.44849	4.77099	3.15484	3.15666	3.77711	3.76667	2.55935	3.26052	3.3258	3.27537
[truncated: 12 more columns]

## Sheet: Supplement 1
Supplement 1
RT-qPCR
Relative expression to Ubc and HPRT
	Rad21+/+ NexCre			Rad21lox/lox NexCre
Mdm2 mRNA	0.093	0.106	0.152	0.078	0.068	0.078	0.12	0.115	0.104	0.113	0.094	0.124	0.116
Cdkn1a mRNA	0.141	0.178	0.287	0.107	0.083	0.088	0.275	0.305	0.279	0.278	0.17	0.257	0.206
Cdkn2a mRNA	0	0	0	0	0	0	0	0	0	0	0	0	0
Cdkn2b mRNA	0.002	0.001	0.003	0.002	0.001	0.001	0.004	0.004	0.002	0.003	0.001	0.002	0.004
	Rad21+/+ NexCre			Rad21lox/lox NexCre
Brain weight at birth	96	99	98	70	84	83	83	79	79
Cortex cellularity
Cell number (x10^6)
Rad21+/+ NexCre	E17.5	7.14	6.37	6.16	6.09	7.14	5.88	6.09	7.7	7.7	6.23	5.25	5.74	3.85	3.78	4.06	5.67	3.78	2.87	2.8	3.92	4.62	2.87	4.62	5.95	5.88	6.3	5.88	5.18	5.32	5.32	6.58	4.06	6.16	4.69	5.25	7.21	4.55	6.23	5.81	6.3	6.44	6.37	5.11	5.74	7.35
	E18.5	3.78	4.9	3.5	3.85	5.46	6.02	5.95	5.81	5.04	6.16	6.44	5.32	4.97	6.3	6.37	4.9	5.74	5.18	4.55	6.23	4.13	5.67	4.59	3.96	4.83	5.04	3.92	3.5	4.69	5.6	3.78	6.23	4.27	6.09	6.3	3.01
Rad21lox/lox NexCre	E17.5	6.72	5.88	7.49	6.3	7.21	6.16	7.77	6.3	6.58	6.65	5.95	6.79	5.67	5.81	3.99	3.64	4.2	3.36	3.71	4.55	2.87	4.34	4.76	4.2	5.53	5.18	4.41	4.83	5.04	6.72	5.95	7.14	7.63	4.83	4.83	6.3
	E18.5	4.76	4.06	5.53	6.86	5.39	5.46	5.11	5.81	5.25	3.85	6.02	4.9	2.97	3.36	3.99	5.04	5.11	4.97	3.99	3.85	5.46	5.6	3.5	3.36	6.23	3.57	6.93	4.69	7.35	6.93	4.9	4.62
