# Supplementary material for: Cohesin-dependence of neuronal gene expression relates to chromatin loop length
Source: eLife. 2022 Apr 26;11:e76539. doi: 10.7554/eLife.76539 (PMC9106336; doi:10.7554/eLife.76539)
Supplement: Figure 5—source data 1. [file elife-76539-fig5-data1.xlsx]

## Sheet: Sheet1
		exp 1	exp 2	average
activity-dependent	% down	-19.9	-11.6	-15.75
	% up	0	0.7	0.35
constitutive	% down	-2.7	-3.3	-3
	% up	1	1	1
