# Supplementary material for: Cohesin-dependence of neuronal gene expression relates to chromatin loop length
Source: eLife. 2022 Apr 26;11:e76539. doi: 10.7554/eLife.76539 (PMC9106336; doi:10.7554/eLife.76539)
Supplement: Figure 6—source data 1. [file elife-76539-fig6-data1.xlsx]

## Sheet: Figure 6a
Fig6a
All loops							CTCF loops
IEG	Loop length	DownReg SEG	Loop length	Non-DE SRG	Loop length		IEG	CTCF Loop length	DownReg SEG	CTCF Loop length	Non-DE SRG	CTCF Loop length
Egr3	230000	Fosl2	550000	Spred3	365000		Egr3	230000	Fosl2	55000	Spred3	365000
Klf4	1630000	Sstr2	2080000	Plagl1	1315000		Klf4	1630000	Sstr2	2080000	Plagl1	1315000
Egr4	80000	Dusp4	610000	Nr4a3	610000		Egr4	80000	Dusp4	610000	Nr4a3	610000
Dusp5	145000	Glt28d2	985000	Acsl4	425000		Dusp5	145000	Glt28d2	985000	Acsl4	425000
Egr2	730000	Lipg	540000	Nefl	620000		Egr2	730000	Lipg	540000	Nefl	620000
Nr4a1	0	Pcdh20	995000	Cort	40000		Nr4a1	0	Pcdh20	995000	Cort	40000
Egr1	105000	Gpr26	265000	Bdnf	0		Egr1	105000	Gpr26	265000	Bdnf	0
Ier2	110000	Kcnj3	335000	Mctp2	80000		Ier2	110000	Kcnj3	335000	Mctp2	80000
Dusp1	125000	Acan	135000	Crem	55000		Dusp1	125000	Acan	135000	Crem	55000
Junb	65000	Grasp	755000	Slc2a3	1525000		Junb	65000	Grasp	755000	Slc2a3	1525000
Npas4	495000	Trip10	435000	Stard4	1040000		Npas4	495000	Trip10	435000	Stard4	1040000
Amigo3	80000	Baz1a	0	Errfi1	175000		Amigo3	80000	Baz1a	0	Errfi1	175000
Fos	350000	Bmp3	1740000	Nptx2	310000		Fos	350000	Bmp3	1740000	Nptx2	310000
Maff	115000	Rasgrp1	130000	Pam	260000		Maff	115000	Rasgrp1	130000	Pam	260000
Fosb	85000	Chrm2	1005000	Csrnp1	65000		Fosb	85000	Chrm2	1005000	Csrnp1	65000
Ppp1r15a	0	Kcna4	565000	Chst8	380000		Ppp1r15a	0	Kcna4	565000	Chst8	195000
Arc	860000	Atf3	230000	Sertad1	150000		Arc	860000	Atf3	230000	Sertad1	55000
Gadd45g	1145000	Gpr22	595000	Adcyap1	1545000		Gadd45g	1145000	Gpr22	595000	Adcyap1	1525000
		Tll1	330000	Crhbp	90000				Tll1	330000	Crhbp	1040000
		C2cd4b	210000	Peg10	1225000				C2cd4b	210000	Peg10	175000
		Klf14	565000	Klhl4	0				Klf14	565000	Klhl4	0
		Pou3f1	720000	Nppc	540000				Pou3f1	720000	Nppc	540000
				Gmeb2	125000						Gmeb2	125000
				Sema3e	0						Sema3e	0
				Kcnj4	220000						Kcnj4	220000
				Rgs2	355000						Rgs2	355000
				Hsd17b12	140000						Hsd17b12	140000
				Rheb	0						Rheb	0
				D16Ertd472e	375000						D16Ertd472e	0
				Fbxo33	5585000						Fbxo33	5585000
				Kcna1	145000						Kcna1	145000
				Pard6a	305000						Pard6a	305000
				Osgin2	150000						Osgin2	0
				Slc6a17	110000						Slc6a17	110000
				Chml	225000						Chml	225000
				Spty2d1	120000						Spty2d1	120000
				Per2	70000						Per2	70000
				Gpr3	260000						Gpr3	260000
				Per1	75000						Per1	75000
				Eprs	45000						Eprs	0
				Bves	260000						Bves	260000
				Cystm1	160000						Cystm1	160000
				Pthlh	0						Pthlh	0

## Sheet: Figure 6c
Fig6c
All loops							CTCF loops
non-dereg GO term genes	Loop length	Downreg GO term genes	Loop length	Upreg GO term genes	Loop length		non-dereg GO term genes	CTCF Loop length	Downreg GO term genes	CTCF Loop length	Upreg GO term genes	CTCF Loop length
Wnt7a	1760000	Ephb1	1165000	Pcdh8	415000		Wnt7a	1760000	Ephb1	1165000	Pcdh8	415000
Syt4	1075000	Neto2	1225000	Lama2	0		Syt4	1075000	Neto2	1225000	Lama2	0
Etv5	390000	Adra2a	1160000	Elavl4	230000		Etv5	95000	Adra2a	1160000	Elavl4	230000
Grin3a	2965000	Sstr1	370000	Sv2c	255000		Grin3a	0	Sstr1	0	Sv2c	0
Neto1	1430000	Lypd1	1010000	Htr5a	0		Neto1	1430000	Lypd1	1010000	Htr5a	0
Gsg1l	315000	Htr1a	2710000	Lrrtm2	295000		Gsg1l	315000	Htr1a	2710000	Lrrtm2	295000
Mgll	110000	Nr3c1	685000	Hrh3	140000		Mgll	110000	Nr3c1	685000	Hrh3	140000
Glra2	0	Gabra5	1715000	Snca	0		Glra2	0	Gabra5	1715000	Snca	0
Egr3	230000	Chrm3	465000	Sv2b	200000		Egr3	230000	Chrm3	465000	Sv2b	200000
Grin2c	180000	Nptx1	340000	Pdlim4	595000		Grin2c	180000	Nptx1	340000	Pdlim4	595000
Igsf11	2355000	Kcnh1	940000	Ifngr2	195000		Igsf11	2355000	Kcnh1	940000	Ifngr2	195000
Cdh11	6815000	Shisa6	690000	Jak2	1825000		Cdh11	6815000	Shisa6	690000	Jak2	1825000
Rph3a	175000	Kcnn2	890000	Cacnb3	120000		Rph3a	175000	Kcnn2	890000	Cacnb3	120000
Sorcs3	1720000	Nlgn1	0	Gabrq	1165000		Sorcs3	1720000	Nlgn1	0	Gabrq	1165000
Dgke	55000	Cntnap4	1010000	Chrna3	350000		Dgke	55000	Cntnap4	1010000	Chrna3	350000
Glul	1105000	Sorcs2	520000	Gabbr1	215000		Glul	1105000	Sorcs2	520000	Gabbr1	215000
Ntrk2	680000	Plk2	1875000	Chrna4	95000		Ntrk2	680000	Plk2	1875000	Chrna4	95000
Rara	1370000	Htr2a	1120000	Gabra3	0		Rara	1370000	Htr2a	1120000	Gabra3	0
Sez6	110000	Gabra4	0	Pcdh17	4155000		Sez6	110000	Gabra4	0	Pcdh17	4155000
Oxtr	505000	Gabrd	0	Kiss1r	105000		Oxtr	505000	Gabrd	0	Kiss1r	105000
Kit	575000	Lrfn2	945000	Grin2d	130000		Kit	575000	Lrfn2	945000	Grin2d	130000
Apoe	285000	Grik4	1720000	Rapgef2	0		Apoe	285000	Grik4	1720000	Rapgef2	0
Stxbp5	420000	Grm7	0	Tubb2b	75000		Stxbp5	420000	Grm7	0	Tubb2b	75000
Egfr	0	Cdh8	3445000	Erc2	130000		Egfr	0	Cdh8	3445000	Erc2	130000
Gnai2	280000	Prkce	1410000	Prkar1b	275000		Gnai2	280000	Prkce	1410000	Prkar1b	275000
Serpine2	1430000	Cadps2	0	Fchsd1	60000		Serpine2	1430000	Cadps2	0	Fchsd1	60000
Rapgef4	0	Lrrc4c	0	Cntn2	200000		Rapgef4	0	Lrrc4c	0	Cntn2	200000
Vps18	110000	Calb1	0	Lgmn	60000		Vps18	110000	Calb1	0	Lgmn	60000
Prnp	115000	Gria3	0	Hap1	330000		Prnp	115000	Gria3	0	Hap1	330000
Adora1	135000	Plcl1	1810000	Neurl1a	145000		Adora1	135000	Plcl1	1810000	Neurl1a	145000
Chrnb2	430000	Amigo2	430000	Dnm1l	555000		Chrnb2	430000	Amigo2	430000	Dnm1l	555000
Ctnnb1	435000	Pak7	235000	Syt11	0		Ctnnb1	435000	Pak7	235000	Syt11	0
Kcnj10	515000	Flrt3	2415000	Baiap3	60000		Kcnj10	515000	Flrt3	2415000	Baiap3	60000
Gria1	855000	Gabrg3	1090000	Git2	55000		Gria1	855000	Gabrg3	1090000	Git2	55000
Klhl24	360000	Grm8	2240000	Ston2	2305000		Klhl24	360000	Grm8	2240000	Ston2	2305000
Stau2	410000	Nr3c2	0	Snap25	570000		Stau2	410000	Nr3c2	0	Snap25	570000
Ngfr	100000	Pcdhb16	405000	Mpp2	335000		Ngfr	100000	Pcdhb16	405000	Mpp2	335000
Ctnnd2	1090000	Shisa9	1110000	Ntsr1	105000		Ctnnd2	1090000	Shisa9	1110000	Ntsr1	105000
Abat	140000	Dlgap1	0	Prrt2	195000		Abat	140000	Dlgap1	0	Prrt2	195000
Kcnc4	365000	Grid2	1890000	Chrna5	120000		Kcnc4	365000	Grid2	1890000	Chrna5	120000
Gfap	125000	Gabra1	1395000	Slc17a6	335000		Gfap	125000	Gabra1	1395000	Slc17a6	335000
Pla2g6	0	Ptk2b	280000	Lrrtm1	3870000		Pla2g6	0	Ptk2b	280000	Lrrtm1	3870000
Shc3	65000	Ntng1	2930000	Cdc20	130000		Shc3	65000	Ntng1	2930000	Cdc20	130000
Jph3	635000	Cdk5r1	1705000	Doc2b	640000		Jph3	635000	Cdk5r1	1705000	Doc2b	640000
Anxa3	0	Cckbr	100000	Tprgl	650000		Anxa3	0	Cckbr	100000	Tprgl	650000
Lin7c	2325000	Chrm4	130000	Sybu	315000		Lin7c	2325000	Chrm4	130000	Sybu	315000
Ppargc1a	0	Clstn2	725000	Ifngr1	305000		Ppargc1a	0	Clstn2	725000	Ifngr1	305000
Slc1a3	0	Tshz3	790000	Plat	105000		Slc1a3	0	Tshz3	790000	Plat	0
Rnf216	135000	Tnr	545000	Erc1	0		Rnf216	135000	Tnr	545000	Erc1	0
Bcl2l1	385000	Grid1	2205000	Ghsr	0		Bcl2l1	385000	Grid1	2205000	Ghsr	0
Cbln1	545000	Crhr1	145000	Cyfip1	0		Cbln1	545000	Crhr1	145000	Cyfip1	0
Hnrnpk	365000	Rasgrf1	0	Cacna1g	350000		Hnrnpk	365000	Rasgrf1	0	Cacna1g	350000
Sdcbp	175000	Dlg1	225000	Stat3	390000		Sdcbp	175000	Dlg1	225000	Stat3	390000
Vgf	230000	Adra1a	245000	Trim9	555000		Vgf	230000	Adra1a	245000	Trim9	555000
Bdnf	0	Grm5	1540000	Mecp2	305000		Bdnf	0	Grm5	1540000	Mecp2	305000
Cdh2	2770000	Myo5b	1300000	Nrn1	710000		Cdh2	2770000	Myo5b	1300000	Nrn1	550000
Ptprd	0	Grin2a	1100000	Unc13c	0		Ptprd	0	Grin2a	1100000	Unc13c	0
Ptprd	0	Gabrg1	0	Pfn2	645000		Ptprd	0	Gabrg1	0	Pfn2	575000
Gria2	1110000	Syt10	0	Rab26	105000		Gria2	1110000	Syt10	0	Rab26	105000
Ntng2	350000	Gabrb3	810000	Igsf9b	185000		Ntng2	350000	Gabrb3	50000	Igsf9b	185000
Syt9	0	Prkca	340000	Ppp2ca	75000		Syt9	0	Prkca	340000	Ppp2ca	0
Car2	325000	Plcb1	515000	Cacng5	0		Car2	325000	Plcb1	515000	Cacng5	0
Mctp2	80000	Syt2	205000	Slc8a3	105000		Mctp2	80000	Syt2	205000	Slc8a3	105000
Nrxn1	455000	S1pr2	90000	Clcn3	335000		Nrxn1	455000	S1pr2	90000	Clcn3	335000
Synj1	3550000	Calb2	460000	Asic1	190000		Synj1	0	Calb2	460000	Asic1	190000
Atp2a2	230000	Lynx1	0	Cx3cr1	60000		Atp2a2	230000	Lynx1	0	Cx3cr1	60000
Dnm1	70000	Bace1	285000	Frrs1l	125000		Dnm1	70000	Bace1	285000	Frrs1l	125000
Gabrb2	1650000	Cacnb4	50000	Ngf	0		Gabrb2	1650000	Cacnb4	0	Ngf	0
Prkaca	520000	Homer2	0	Pirb	220000		Prkaca	520000	Homer2	0	Pirb	0
Bscl2	260000	Htr2c	0	Slc5a7	0		Bscl2	260000	Htr2c	0	Slc5a7	0
Clstn1	80000	Rin1	65000	Tyrobp	150000		Clstn1	80000	Rin1	65000	Tyrobp	150000
Nrg3	465000	Chrm2	1005000				Nrg3	465000	Chrm2	1005000
Gabrg2	0	Htr7	1825000				Gabrg2	0	Htr7	1825000
Pak1	215000	Itpka	0				Pak1	215000	Itpka	0
Ppp1r9b	0	Adcy8	890000				Ppp1r9b	0	Adcy8	890000
Cplx3	0	Ctbp2	460000				Cplx3	0	Ctbp2	460000
Pde4a	75000	Htr1b	1980000				Pde4a	75000	Htr1b	1980000
Cask	0	Plcl2	540000				Cask	0	Plcl2	540000
Cnih3	170000	Stxbp5l	280000				Cnih3	170000	Stxbp5l	280000
Grm4	465000	Rasgrf2	0				Grm4	465000	Rasgrf2	0
Ncdn	130000	Myo6	50000				Ncdn	130000	Myo6	50000
P2rx4	55000	Mef2c	1585000				P2rx4	0	Mef2c	1585000
Nptx2	310000	Mme	0				Nptx2	310000	Mme	0
Xbp1	160000	Crtac1	235000				Xbp1	160000	Crtac1	235000
Grik1	0	Nrgn	50000				Grik1	0	Nrgn	50000
Homer1	180000	Gjd2	0				Homer1	0	Gjd2	0
Eif4a3	580000	Gria4	0				Eif4a3	580000	Gria4	0
Gjc1	100000	Abhd6	190000				Gjc1	100000	Abhd6	190000
Fam107a	360000	Fgf12	0				Fam107a	360000	Fgf12	0
Cadps	0	Cartpt	0				Cadps	0	Cartpt	0
Cpeb3	370000	Dgki	235000				Cpeb3	175000	Dgki	235000
Ssh1	0	Grm3	0				Ssh1	0	Grm3	0
Cacng2	155000	Adcy1	410000				Cacng2	155000	Adcy1	410000
Pten	615000	Adrb1	260000				Pten	615000	Adrb1	175000
Cacnb2	1320000	Gabrb1	0				Cacnb2	1320000	Gabrb1	0
Eif4e	695000	Plekhg5	70000				Eif4e	695000	Plekhg5	70000
Pacsin2	0	Bche	0				Pacsin2	0	Bche	0
Plcg1	135000	Cacna1e	1175000				Plcg1	135000	Cacna1e	1175000
Sncaip	135000	Egln1	960000				Sncaip	135000	Egln1	960000
Ppt1	50000	Syt12	0				Ppt1	50000	Syt12	0
Camk4	880000	Ppfia3	70000				Camk4	880000	Ppfia3	70000
Prkcz	0	Ntf3	745000				Prkcz	0	Ntf3	745000
Apba2	770000	Rims2	625000				Apba2	770000	Rims2	625000
Ptn	0	Chrm1	100000				Ptn	0	Chrm1	100000
Cln3	540000	Rgs4	0				Cln3	540000	Rgs4	0
Cyth1	345000	Htr4	0				Cyth1	345000	Htr4	0
Rnf19a	220000	Asic2	440000				Rnf19a	220000	Asic2	440000
Car7	185000	Cep89	1945000				Car7	185000	Cep89	1945000
Grik3	450000	Crh	130000				Grik3	450000	Crh	130000
Snapin	115000	Gabrr2	245000				Snapin	115000	Gabrr2	245000
Cacng7	250000	Glra3	0				Cacng7	250000	Glra3	0
Daglb	110000	Lingo2	1995000				Daglb	110000	Lingo2	1995000
Sipa1l1	1090000	Mir9-2	1465000				Sipa1l1	1090000	Mir9-2	1465000
Pnkd	300000	Ptger4	990000				Pnkd	300000	Ptger4	990000
Mtmr2	45000	Ptgs2	0				Mtmr2	0	Ptgs2	0
Kras	560000	Sphk1	80000				Kras	560000	Sphk1	80000
Adcyap1	1545000	Sptbn2	240000				Adcyap1	1545000	Sptbn2	240000
Crhbp	90000	Syne4	150000				Crhbp	90000	Syne4	150000
Atp2b2	235000						Atp2b2	235000
Grik2	3770000						Grik2	3770000
Mctp1	0						Mctp1	0
Stx2	0						Stx2	0
Pclo	275000						Pclo	275000
Usp46	195000						Usp46	195000
Rgs9	545000						Rgs9	545000
Akap7	1050000						Akap7	1050000
Egr1	105000						Egr1	105000
Nr2e1	335000						Nr2e1	335000
Disc1	0						Disc1	0
Fbxl20	250000						Fbxl20	250000
Zmynd8	390000						Zmynd8	390000
Gnaq	470000						Gnaq	470000
Star	370000						Star	370000
Ephb4	435000						Ephb4	435000
Baiap2	155000						Baiap2	155000
Mink1	0						Mink1	0
Mapk1	80000						Mapk1	80000
Otof	240000						Otof	240000
Retn	395000						Retn	395000
Rims4	0						Rims4	0
P2rx7	55000						P2rx7	0
Gls	50000						Gls	50000
Cplx2	605000						Cplx2	605000
Cspg5	100000						Cspg5	100000
Ppp1r9a	1390000						Ppp1r9a	1390000
Slitrk5	3110000						Slitrk5	3110000
Met	0						Met	0
Cd38	405000						Cd38	405000
Anapc2	130000						Anapc2	130000
Bcr	95000						Bcr	95000
Grm1	55000						Grm1	0
Ncstn	295000						Ncstn	295000
Abr	115000						Abr	115000
Pick1	390000						Pick1	390000
Epha4	2040000						Epha4	2040000
Prepl	120000						Prepl	0
Agrn	0						Agrn	0
Rpl22	125000						Rpl22	125000
Slc12a4	0						Slc12a4	0
Chrna7	275000						Chrna7	275000
Mmp9	395000						Mmp9	395000
Slc17a7	125000						Slc17a7	125000
Rims1	0						Rims1	0
Nsg1	0						Nsg1	0
Psen2	495000						Psen2	495000
Gipc1	50000						Gipc1	50000
Mir434	725000						Mir434	725000
Mirlet7d	655000						Mirlet7d	655000
Mir425	110000						Mir425	110000
S100b	0						S100b	0
Slc17a8	295000						Slc17a8	295000
Apba3	885000						Apba3	885000
Mtor	175000						Mtor	175000
Nat8l	50000						Nat8l	0
Sv2a	180000						Sv2a	180000
Cnr1	520000						Cnr1	520000
Cyp46a1	150000						Cyp46a1	150000
Slc29a1	75000						Slc29a1	75000
Stxbp1	260000						Stxbp1	260000
Ric3	300000						Ric3	300000
Crhr2	0						Crhr2	0
Eif2ak4	155000						Eif2ak4	155000
Stac3	80000						Stac3	80000
Ythdf1	95000						Ythdf1	95000
Nptn	505000						Nptn	505000
Pdzd11	0						Pdzd11	0
Ophn1	210000						Ophn1	210000
Src	130000						Src	130000
Htr3a	585000						Htr3a	585000
Creb1	55000						Creb1	55000
Grm2	0						Grm2	0
Rab5a	0						Rab5a	0
Stau1	400000						Stau1	400000
Dlgap2	755000						Dlgap2	755000
Vdac1	200000						Vdac1	200000
Celf4	4480000						Celf4	4480000
Camk2b	110000						Camk2b	110000
Scrib	255000						Scrib	255000
Itpr3	465000						Itpr3	465000
Syn2	70000						Syn2	70000
Gsk3b	410000						Gsk3b	410000
Iqsec2	205000						Iqsec2	205000
Penk	2275000						Penk	2275000
Rims3	385000						Rims3	385000
Arrb2	310000						Arrb2	310000
Sh3gl1	300000						Sh3gl1	300000
Lgi1	0						Lgi1	0
Tac1	0						Tac1	0
Cav2	0						Cav2	0
Clstn3	55000						Clstn3	55000
Vdac3	385000						Vdac3	385000
Dcc	1695000						Dcc	1695000
Kcnb1	115000						Kcnb1	115000
Nf1	0						Nf1	0
Cacnb1	205000						Cacnb1	205000
Syn3	440000						Syn3	440000
Snap91	370000						Snap91	370000
Slc12a5	395000						Slc12a5	395000
Dbi	0						Dbi	0
Slc24a2	0						Slc24a2	0
Fyn	185000						Fyn	185000
Kcnma1	420000						Kcnma1	420000
Hrh2	0						Hrh2	0
Nlgn2	240000						Nlgn2	240000
Gabra2	1390000						Gabra2	1390000
Dlg4	610000						Dlg4	610000
Atp1a3	55000						Atp1a3	55000
Cacng3	235000						Cacng3	235000
Camk2a	260000						Camk2a	260000
Syt7	130000						Syt7	130000
Rap1b	280000						Rap1b	280000
Pdyn	185000						Pdyn	185000
Fmr1	0						Fmr1	0
Kat2a	330000						Kat2a	330000
Rimbp2	430000						Rimbp2	430000
Nos1	305000						Nos1	305000
Homer3	50000						Homer3	50000
Doc2a	295000						Doc2a	295000
Celsr1	420000						Celsr1	420000
Plcb4	250000						Plcb4	220000
App	495000						App	495000
Ptk2	100000						Ptk2	100000
Snap29	225000						Snap29	225000
Cacna1b	350000						Cacna1b	350000
P2ry2	0						P2ry2	0
Cacna2d2	130000						Cacna2d2	130000
Slc30a1	95000						Slc30a1	95000
Arid1b	1420000						Arid1b	1420000
Slc6a9	750000						Slc6a9	750000
Slc12a6	85000						Slc12a6	85000
Lrrk2	0						Lrrk2	0
Grik5	55000						Grik5	55000
Dbn1	125000						Dbn1	125000
Git1	465000						Git1	465000
Npas4	495000						Npas4	495000
Dtnbp1	1385000						Dtnbp1	1385000
Ptprs	155000						Ptprs	155000
Sncb	400000						Sncb	400000
Paip2	950000						Paip2	950000
L1cam	0						L1cam	0
Th	575000						Th	575000
Nrxn3	1490000						Nrxn3	1490000
Fchsd2	305000						Fchsd2	305000
Kcnq4	125000						Kcnq4	125000
Syde1	0						Syde1	0
Rab11a	315000						Rab11a	315000
Shisa7	85000						Shisa7	85000
Lrp6	145000						Lrp6	145000
Dapk1	120000						Dapk1	120000
Rgs14	155000						Rgs14	155000
Vamp2	75000						Vamp2	75000
Kcnc3	0						Kcnc3	0
Spg11	0						Spg11	0
Pnoc	150000						Pnoc	150000
Dvl1	70000						Dvl1	50000
Necab2	335000						Necab2	335000
Grin2b	1090000						Grin2b	1090000
Neurod2	80000						Neurod2	80000
Ica1	0						Ica1	0
Cux2	170000						Cux2	170000
Adarb1	55000						Adarb1	0
Ppfia2	590000						Ppfia2	590000
Psmc5	500000						Psmc5	500000
Shank1	70000						Shank1	70000
Tiam1	0						Tiam1	0
Grin1	115000						Grin1	115000
Syn1	60000						Syn1	0
P2ry1	0						P2ry1	0
Rap1a	120000						Rap1a	120000
Shank3	60000						Shank3	60000
Myo5a	145000						Myo5a	145000
P2rx3	365000						P2rx3	300000
Rab8a	450000						Rab8a	450000
Synpo	0						Synpo	0
Stx1b	415000						Stx1b	415000
Napa	110000						Napa	110000
Ncam1	705000						Ncam1	705000
Lin7b	70000						Lin7b	70000
Eif4ebp2	145000						Eif4ebp2	145000
Unc13b	350000						Unc13b	350000
Syt1	705000						Syt1	705000
Pafah1b1	70000						Pafah1b1	0
Snap23	0						Snap23	0
Slc6a6	50000						Slc6a6	50000
Usp8	440000						Usp8	440000
Cacna1a	150000						Cacna1a	150000
Adnp	80000						Adnp	80000
Mapt	55000						Mapt	55000
Stx3	155000						Stx3	155000
Usp14	225000						Usp14	225000
Lin7a	655000						Lin7a	655000
Shank2	170000						Shank2	170000
Dmpk	140000						Dmpk	140000
Braf	0						Braf	0
Kif13b	110000						Kif13b	110000
Nrxn2	255000						Nrxn2	255000
Slc4a10	0						Slc4a10	0
Npy2r	0						Npy2r	0
Ppp3r1	670000						Ppp3r1	670000
Apba1	510000						Apba1	510000
Slc6a1	165000						Slc6a1	165000
Mir541	835000						Mir541	835000
Rab3b	305000						Rab3b	305000
Syt17	230000						Syt17	230000
Cx3cl1	80000						Cx3cl1	80000
Lzts1	75000						Lzts1	75000
Htr5b	75000						Htr5b	75000
Gnai1	270000						Gnai1	270000
Cnih2	65000						Cnih2	65000
Ptpra	120000						Ptpra	120000
Sqstm1	145000						Sqstm1	145000
Begain	0						Begain	0
Synj2bp	0						Synj2bp	0
Csnk2b	490000						Csnk2b	250000
Rasd2	140000						Rasd2	140000
Napb	60000						Napb	60000
Slc12a7	170000						Slc12a7	170000
Tacr1	0						Tacr1	0
Pxk	235000						Pxk	235000
Vamp1	90000						Vamp1	90000
Flot1	120000						Flot1	120000
F2r	0						F2r	0
Stx1a	120000						Stx1a	120000
Brsk1	245000						Brsk1	245000
Vhl	75000						Vhl	75000
Ncs1	0						Ncs1	0
Syp	225000						Syp	225000
Syngap1	590000						Syngap1	590000
Mir7-1	365000						Mir7-1	365000
Cacng4	160000						Cacng4	160000
Cpeb1	295000						Cpeb1	295000
Ptprn2	130000						Ptprn2	130000
Rab3gap1	360000						Rab3gap1	360000
Ptpn5	120000						Ptpn5	120000
Atad1	705000						Atad1	705000
Syngr1	595000						Syngr1	595000
Unc13a	455000						Unc13a	70000
Slc7a11	0						Slc7a11	0
Jph4	410000						Jph4	410000
Prkar2b	180000						Prkar2b	70000
Nedd4	200000						Nedd4	200000
Kctd13	140000						Kctd13	140000
Atxn1	660000						Atxn1	660000
Efnb3	115000						Efnb3	115000
Cacna1c	555000						Cacna1c	555000
Fgf14	0						Fgf14	0
Arf1	265000						Arf1	265000
Cfl1	0						Cfl1	0
Cplx1	0						Cplx1	0
Lrrc4	305000						Lrrc4	305000
Slc8a2	175000						Slc8a2	175000
Tmem108	390000						Tmem108	390000
Stx11	1630000						Stx11	1630000
Arc	860000						Arc	860000
Rhot1	115000						Rhot1	115000
Mapk8ip2	85000						Mapk8ip2	85000
Tor1a	0						Tor1a	0
Dlg3	0						Dlg3	0
Ephb2	145000						Ephb2	145000
Npy5r	695000						Npy5r	695000
Rab3a	65000						Rab3a	65000
Prkcb	175000						Prkcb	175000
Htr1f	0						Htr1f	0
Glrb	835000						Glrb	835000
Dgkb	0						Dgkb	0
Nlgn3	155000						Nlgn3	155000
Snap47	140000						Snap47	140000
Exoc4	0						Exoc4	0
Rac1	40000						Rac1	0
Stx4a	0						Stx4a	0
Prkar2a	110000						Prkar2a	110000
Dagla	70000						Dagla	70000
Ywhag	0						Ywhag	0
Rac3	330000						Rac3	330000
Reln	380000						Reln	380000
Kif5b	240000						Kif5b	240000
Pink1	535000						Pink1	535000
Tmod2	0						Tmod2	0
Doc2g	150000						Doc2g	150000
Scgn	210000						Scgn	210000
Srf	85000						Srf	85000
Cdk5	0						Cdk5	0
Akap12	60000						Akap12	60000
Cpeb4	675000						Cpeb4	675000
Dlg2	0						Dlg2	0
Grip2	280000						Grip2	280000
Htt	55000						Htt	55000
Lrp8	100000						Lrp8	100000
Abl1	210000						Abl1	210000
Ccl2	880000						Ccl2	880000
Chrm5	270000						Chrm5	270000
Chrna1	1095000						Chrna1	1095000
Chrne	395000						Chrne	395000
Hras	270000						Hras	270000
Hrh1	350000						Hrh1	350000
Kdr	0						Kdr	0
Kmt2a	295000						Kmt2a	295000
Map1a	0						Map1a	0
Mir132	390000						Mir132	390000
Mir134	835000						Mir134	835000
Mir1983	60000						Mir1983	60000
Mir381	920000						Mir381	835000
Mir382	835000						Mir382	835000
Mir384	0						Mir384	0
Mir539	920000						Mir539	835000
Mir667	920000						Mir667	835000
Mir99a	510000						Mir99a	510000
Mirlet7c-1	510000						Mirlet7c-1	510000
Mirlet7f-1	655000						Mirlet7f-1	655000
Nsmf	65000						Nsmf	0
Prkcg	115000						Prkcg	115000
Tbc1d24	190000						Tbc1d24	190000
Tpgs1	75000						Tpgs1	75000
