# Supplementary material for: Cohesin-dependence of neuronal gene expression relates to chromatin loop length
Source: eLife. 2022 Apr 26;11:e76539. doi: 10.7554/eLife.76539 (PMC9106336; doi:10.7554/eLife.76539)
Supplement: Figure 7—source data 1. [file elife-76539-fig7-data1.xlsx]

## Sheet: Figure 7a,b
		WT_Base_11	WT_Base_15	WT_Base_7	WT_TTX_19	WT_TTX_23	WT_TTX_3	WT_KCl1h_16	WT_KCl1h_24	WT_KCl1h_8	WT_KCl6h_12	WT_KCl6h_20	WT_KCl6h_4		KO_Base_1	KO_Base_17	KO_Base_21	KO_TTX_13	KO_TTX_5	KO_TTX_9	KO_KCl1h_10	KO_KCl1h_18	KO_KCl1h_2	KO_KCl6h_14	KO_KCl6h_22	KO_KCl6h_6
Fos		1053.4	643.242	966.893	300.44	220.326	205.58	28551.8	23677.7	18222.9	7707.29	8133.75	11390.7		151.709	175.94	604.484	101.626	98.6163	134.378	26167.1	32174.5	30132	9382.98	10239.1	11379.8
Fos_e1		9.7455	5.9013	7.58773	0	0	0	22.3662	21.228	21.8619	31.0456	23.1319	17.3339		1.65802	2.74906	7.88457	0	0	0	49.1928	26.6361	18.8577	19.4541	24.0151	17.8014
Fos_e2		2.65786	10.3273	7.58773	2.80785	4.42125	4.26072	12.4257	23.3508	25.1411	11.5312	9.63829	11.5559		4.14505	2.74906	11.3888	6.22202	8.21803	0	48.0215	29.807	20.572	7.2953	6.72422	10.3061
Fos_e5		7.97359	7.37663	19.5113	4.49256	3.68438	3.19554	39.7622	31.842	45.9099	13.3053	13.4936	18.4895		5.80307	4.1236	7.00851	3.11101	1.49419	8.72586	53.8778	32.978	25.715	14.5906	20.1727	12.1799

## Sheet: Figure 7c
H3K27Ac normalized to H3	Control TTX		Control KCl			Rad21-/- TTX			Rad21-/- KCl
	Replicate 1	Replicate 2	Replicate 1	Replicate 2	Replicate 3	Replicate 1	Replicate 2	Replicate 3	Replicate 1	Replicate 2	Replicate 3
Intergenic	0.984831	1.88371	0.589787	0.594666	1.65056	0.385128	0.727074	0.002454	0.501104	0.265345	0.723415
c-fos e1	7.48905	4.90093	39.6773	36.3879	31.0637	5.65676	10.7901	3.38708	41.1153	14.0861	35.3139
c-fos e2	25.3591	16.2468	49.223	57.3259	48.428	23.9832	35.2211	24.8493	73.9123	33.2606	50.6832

## Sheet: Figure 7e
Obs Values	rep 1	rep 2	mean
Fos enh 1
WT_TTX	1166.96	1027.83	1097.39
WT_KCl	1751.75	1616.9	1684.33
Rad21KO_TTX	986.38	960.81	973.59
Rad21KO_KCl	1432.61	1333.39	1383
Fos enh 2
WT_TTX	2183.91	2140.71	2162.32
WT_KCl	2835.23	3060.29	2947.76
Rad21KO_TTX	1969.97	1946.31	1958.14
Rad21KO_KCl	3110.23	2913.22	3011.72
Fos CTCF loop
WT_TTX	1447.03	1369.68	1408.35
WT_KCl	1288.96	1408.38	1348.67
Rad21KO_TTX	702.12	843.55	772.84
Rad21KO_KCl	636.81	771.76	704.28

## Sheet: Figure 7 - figure supplement 1a
Figure 7 - figure supplement 1a
RNA-seq		Rad21lox/lox NexCre versus Rad21+/+ NexCre
Normalized counts
	Rad21+/+_baseline_1	Rad21+/+_baseline_2	Rad21+/+_baseline_3	Rad21+/+_TTX_1	Rad21+/+_TTX_2	Rad21+/+_TTX_3	Rad21+/+_1h KCl_1	Rad21+/+_1h KCl_2	Rad21+/+_1h KCl_3	Rad21+/+_6h KCl_1	Rad21+/+_6h KCl_2	Rad21+/+_6h KCl_3	Rad21lox/lox_baseline_1	Rad21lox/lox_baseline_2	Rad21lox/lox_baseline_3	Rad21lox/lox_TTX_1	Rad21lox/lox_TTX_2	Rad21lox/lox_TTX_3	Rad21lox/lox_1h KCl_1	Rad21lox/lox_1h KCl_2	Rad21lox/lox_1h KCl_3	Rad21lox/lox_6h KCl_1	Rad21lox/lox_6h KCl_2	Rad21lox/lox_6h KCl_3
Gadd45b	83.846	71.373	105.188	133.017	136.154	108.927	2366.11	1628.91	2477.15	329.268	334.678	439.009	58.7037	63.1619	79.7427	142.117	105.988	116.704	3644.77	4227.74	2534.71	641.76	570.824	612.738
Dusp14	895.829	643.438	621.404	568.249	502.81	402.587	716.776	652.44	705.188	2411.17	1478.56	2004.48	482.859	442.133	658.973	374.482	336.623	463.331	588.363	658.315	544.154	3144.38	2548.49	2841.49
Homer1	4977.81	4769.01	5833.06	3909.64	3530.97	3872.79	5811.1	7841.32	9110.36	16844.7	12142	21748.3	3637.98	3342.77	3086.3	2655.61	2843.75	2496.06	6330.03	6797.27	6718.26	21715.3	22466.2	16280.4
Npas4	720.782	1451.25	877.744	144.723	254.23	172.958	14653	9773.46	11438.4	10872.8	6900.92	7057.1	100.871	111.22	401.342	64.3155	71.6537	64.4482	18968.7	19256.8	15389.6	9768.61	9512.16	5891.72

## Sheet: Figure 7 - figure supplement 1b
Figure 7 - figure supplement 1b
RT-qPCR	BDNF estimulation
Relative expression to Ubc and Hprt
Fos mRNA
	Rad21+/+ NexCre							Rad21lox/lox NexCre
0	0.0598502	0.124576	0.027278	0.0237957	0.0511143	0.0657152	0.0557407	0.0574122	0.0423205	0.0344345	0.0712554	0.0397479	0.0191526	0.0217157
BDNF 10min	0.210224	0.0867668	0.572258	0.406849	0.046629	0.0677974	0.0521884	0.164938		0.130534	0.0785264	0.0242365	0.324434	0.0177611
BDNF 30min	1	1	0.962855	1.03714	1.0961	0.972569	0.931336	0.658612	0.61664	0.688964	0.656326	1.26806	1.02438	0.583325
BDNF 2h	0.328167	1.04799	0.447475	0.571677	0.882625	1.02802	0.950905	0.32421		0.368567	0.896752	0.8381	0.627394	0.566392
BDNF 4h	0.0543152	0.187106	0.10679	0.113755	0.209842	0.222577	0.297791	0.116226	0.137738	0.142102	0.185652	0.228793	0.285548	0.154414

## Sheet: Figure 7 - figure supplement 2a
Figure 7 - figure supplement 2a
RNA-seq		Rad21lox/lox NexCre versus Rad21+/+ NexCre
Normalized counts
	Rad21+/+_baseline_1	Rad21+/+_baseline_2	Rad21+/+_baseline_3	Rad21+/+_TTX_1	Rad21+/+_TTX_2	Rad21+/+_TTX_3	Rad21+/+_1h KCl_1	Rad21+/+_1h KCl_2	Rad21+/+_1h KCl_3	Rad21+/+_6h KCl_1	Rad21+/+_6h KCl_2	Rad21+/+_6h KCl_3	Rad21lox/lox_baseline_1	Rad21lox/lox_baseline_2	Rad21lox/lox_baseline_3	Rad21lox/lox_TTX_1	Rad21lox/lox_TTX_2	Rad21lox/lox_TTX_3	Rad21lox/lox_1h KCl_1	Rad21lox/lox_1h KCl_2	Rad21lox/lox_1h KCl_3	Rad21lox/lox_6h KCl_1	Rad21lox/lox_6h KCl_2	Rad21lox/lox_6h KCl_3
Arc	130.917	104.897	129.938	102.157	146.323	116.287	15793.9	11121	11470.1	1207.32	1428.41	2097.98	28.1116	42.5656	56.0828	49.7926	50.7547	76.6411	6456.6	6940.66	6552.08	2653.34	2613.38	1489.04
RT-qPCR	BDNF estimulation
Relative expression to Ubc and Hprt
Arc mRNA	Rad21+/+ NexCre							Rad21lox/lox NexCre
0	0.0049273	0.0043024	0.0041623	0.0029136	0.0011219	0.0011355	0.0011615	0.0026866	0.0021596	0.0018768	0.0018439	0.0018439	0.0020812	0.000987
BDNF 10min	0.0433597	0.0110633	0.067846	0.0570239	0.0027673	0.0025377	0.0032965	0.0074554		0.0087288	0.0030731	0.0036878	0.0149844	0.0013576
BDNF 30min	0.37566	0.24032	0.387097	0.335068	0.195832	0.145107	0.135155	0.0821839	0.107321	0.105112	0.0399508	0.0934235	0.262643	0.0432155
BDNF 2h	1	1	1.06847	0.93153	0.929929	0.942911	1.12716	0.462492		0.456125	0.481254	0.981561	0.881582	0.602984
BDNF 4h	0.245705	0.384143	0.530697	0.404162	0.475558	0.37441	0.515017	0.478802	0.500867	0.587434	0.649662	1.3614	1.05557	0.717073

## Sheet: Figure 7 - figure supplement 2c
Figure 7 - figure supplement 2c
Obs Values	rep 1	rep 2	mean
Arc enh-prom
WT_TTX	1257.56	1351.9	1304.73
WT_KCl	1700.68	1506.65	1603.66
Rad21KO_TTX	1505.04	1464.48	1484.76
Rad21KO_KCl	1478.54	1389.85	1434.19
Arc_CTCF loop
WT_TTX	243.58	251.85	247.71
WT_KCl	233.94	228.85	231.4
Rad21KO_TTX	128.76	158.73	143.74
Rad21KO_KCl	123.56	130.5	127.03
