# Supplementary material for: Cohesin-dependence of neuronal gene expression relates to chromatin loop length
Source: eLife. 2022 Apr 26;11:e76539. doi: 10.7554/eLife.76539 (PMC9106336; doi:10.7554/eLife.76539)
Supplement: Supplementary file 1. [file elife-76539-supp1.xlsx]

## Sheet: Sheet 1 - RiboTag_RNAseq
Supplementary Data 1
NexCre Ribotag RNAseq Rad21lox/lox minus wild-type
RiboTag_RNAseq
geneNames	baseMean	log2FoldChange	lfcSE	stat	pvalue	padj
Rad21	2075.718217	-5.729631205	0.177589581	-32.26332968	2.29E-228	3.12E-224
Plxnd1	3197.231394	-3.91735744	0.139797202	-28.02171555	8.84E-173	6.03E-169
Ldb2	2773.123232	-4.159243405	0.163000276	-25.51678747	1.28E-143	5.84E-140
Vcan	3058.10977	-4.76967914	0.187470124	-25.44234266	8.58E-143	2.93E-139
Cpne4	4234.995856	-3.336695016	0.148258248	-22.5059655	3.63E-112	9.91E-109
Kcnh5	815.1480435	-4.996882355	0.243003501	-20.56300558	5.8871E-94	1.33961E-90
Sema6a	5974.271803	-3.014356896	0.151498694	-19.89691671	4.32743E-88	8.44035E-85
Lrrtm4	650.9922582	-3.996134603	0.204258811	-19.56407455	3.13035E-85	5.34233E-82
Etv6	2015.436987	-3.261862831	0.167946474	-19.42203823	5.02552E-84	7.62372E-81
Cacna1i	2538.443774	-2.647439536	0.136930313	-19.33421085	2.76871E-83	3.78013E-80
Pcdh20	2112.125094	-3.748321915	0.194018327	-19.31942191	3.68757E-83	4.21199E-80
Brinp1	10626.59553	-2.690731082	0.139277419	-19.31921984	3.70203E-83	4.21199E-80
Cpne8	1660.033105	-3.834300696	0.199644967	-19.20559662	3.32284E-82	3.48975E-79
Ntf3	661.8565919	-4.587564155	0.243430989	-18.84544023	3.20289E-79	3.12351E-76
Nell1	705.4846538	-4.118370454	0.221378388	-18.60330856	3.02076E-77	2.74949E-74
Lama2	2244.165487	2.493297372	0.137881583	18.08288915	4.34697E-73	3.70932E-70
Nfib	14762.8296	2.004410598	0.113183855	17.7093332	3.55256E-70	2.85312E-67
Kcnh1	1617.55902	-2.557291432	0.145434681	-17.58377993	3.27965E-69	2.37703E-66
Gabrg1	337.348653	-4.727965092	0.26888963	-17.58329275	3.30795E-69	2.37703E-66
Pcdha12	299.2022878	-4.485455102	0.255328937	-17.56735898	4.38098E-69	2.99068E-66
Sfrp1	1718.411167	-2.633609235	0.154505897	-17.04536388	3.78382E-65	2.46002E-62
Kctd12	1656.931407	-2.810923742	0.165581166	-16.97610788	1.23403E-64	7.6583E-62
Nwd2	14868.84672	-2.547434637	0.150323724	-16.94632465	2.04867E-64	1.21611E-61
Rspo2	366.3190003	-4.548973901	0.269755525	-16.86332062	8.37488E-64	4.76426E-61
Npr3	376.1044722	-4.222572725	0.251849754	-16.76623722	4.3095E-63	2.3535E-60
Chst2	9505.903709	-2.061714702	0.123385273	-16.70956879	1.1164E-62	5.86238E-60
Vstm2a	1905.300508	-3.226274678	0.19319541	-16.69954104	1.32077E-62	6.67868E-60
B3gat1	5178.191821	-1.995751002	0.121210647	-16.46514595	6.53049E-61	3.18432E-58
Edil3	5421.508309	-2.086158238	0.127942148	-16.30548084	9.02261E-60	4.24778E-57
Pcsk2	5757.528965	-2.380029796	0.148650734	-16.01088494	1.07273E-57	4.8782E-55
Unc5c	2159.596396	-2.846662046	0.177817543	-16.00889316	1.10763E-57	4.8782E-55
Lpl	628.7954713	-3.75980046	0.23527295	-15.98058964	1.74488E-57	7.44462E-55
Fbxw7	8318.97169	-2.112237222	0.133089581	-15.87079321	1.00957E-56	4.17686E-54
Lrrtm3	1129.149191	-2.64449432	0.166830152	-15.85141705	1.37446E-56	5.51927E-54
Efna5	166.8528038	-4.734541128	0.311626666	-15.19299098	3.93545E-52	1.53516E-49
Trpc4	498.1374499	-3.146161302	0.207225612	-15.1822995	4.63252E-52	1.75688E-49
Pex5l	2035.89395	-2.402555042	0.16138551	-14.88705552	4.00001E-50	1.47601E-47
Chrm3	343.6685133	-3.755895026	0.252372376	-14.88235397	4.29131E-50	1.54182E-47
Cdh12	1075.856087	-2.945505249	0.198292291	-14.85436084	6.51867E-50	2.28204E-47
Car10	668.4053659	-3.663752607	0.247461011	-14.80537313	1.35234E-49	4.61589E-47
Plxdc2	1667.976176	-2.448593509	0.167246952	-14.64058679	1.54727E-48	5.15241E-46
Vwc2l	350.7107518	-3.711938249	0.258677067	-14.34969976	1.06999E-46	3.47825E-44
Calb2	1885.926071	-2.792068765	0.195631826	-14.27205799	3.2679E-46	1.0376E-43
Lingo2	1393.408684	-2.080879865	0.146003702	-14.2522404	4.34127E-46	1.34708E-43
Tcerg1l	397.0151968	-3.372109353	0.240231677	-14.03690551	9.26716E-45	2.81166E-42
Cntn5	2026.158171	-2.431403996	0.173482329	-14.01528334	1.25696E-44	3.7307E-42
Car8	123.5867058	-4.604664171	0.330556078	-13.93005447	4.16038E-44	1.20855E-41
Gpr6	418.9529591	-3.031906592	0.21829114	-13.88927923	7.35719E-44	2.09266E-41
Nrxn3	1689.896068	-2.695524919	0.195021505	-13.82168043	1.88615E-43	5.25542E-41
Luzp2	1180.677954	-2.656270778	0.192921765	-13.76864234	3.93539E-43	1.0746E-40
Pdzrn3	2035.741539	-2.200870022	0.160666915	-13.69833992	1.03872E-42	2.78072E-40
Aldh1a3	324.0112733	-4.100777246	0.304663287	-13.46003088	2.68804E-41	7.05765E-39
Grm7	3729.527768	-1.667925201	0.124483857	-13.39872692	6.15092E-41	1.5845E-38
Lrrc4c	9075.430127	-1.934452389	0.144498291	-13.38737214	7.1672E-41	1.81211E-38
Rasgrp1	468.4243358	-3.228439166	0.24377515	-13.24351218	4.91934E-40	1.22116E-37
Cav1	178.5559944	-4.194529019	0.316882552	-13.23685699	5.37516E-40	1.31048E-37
Stxbp6	648.8242968	-2.607221624	0.200158939	-13.02575662	8.73311E-39	2.09181E-36
Alcam	2447.160877	-2.005892008	0.154942977	-12.94600146	2.47514E-38	5.8264E-36
Kcnk9	389.0501953	-3.015884093	0.233043927	-12.94126879	2.63246E-38	6.09168E-36
Nxn	642.82689	2.470042621	0.191337866	12.90932462	3.98783E-38	9.07432E-36
Tshz3	1689.30592	-2.043232457	0.158858458	-12.86196836	7.36763E-38	1.64902E-35
Htr2a	128.5598757	-4.254068573	0.33327028	-12.76462028	2.58408E-37	5.69039E-35
Gatm	1928.693163	-1.712606475	0.134341008	-12.74820324	3.19013E-37	6.91347E-35
Nov	7164.304243	-2.427622657	0.193062726	-12.57426904	2.92493E-36	6.2397E-34
Crym	599.5072621	-2.627497115	0.209010754	-12.57110971	3.04421E-36	6.39424E-34
Kit	842.4685527	-2.242610858	0.178948421	-12.53216344	4.97858E-36	1.02989E-33
Rhou	3398.06263	-1.683891013	0.135950107	-12.38609554	3.10811E-35	6.33359E-33
Trhde	390.7075413	-2.512122001	0.203456691	-12.3472076	5.04317E-35	1.01256E-32
Lmo4	12473.99146	-1.436781259	0.116486692	-12.33429534	5.92046E-35	1.17148E-32
Igfbp4	262.7537761	-3.286080164	0.266893363	-12.31233375	7.77422E-35	1.49628E-32
Bace2	221.4416945	-3.25614108	0.264463272	-12.31226194	7.78114E-35	1.49628E-32
Nts	116.6670669	-4.02497466	0.327423105	-12.29288524	9.89116E-35	1.87561E-32
Pcdhb22	390.523465	-2.616323413	0.214133357	-12.21819639	2.48538E-34	4.64833E-32
Sh3d19	3569.287068	-1.702617172	0.140291294	-12.13629955	6.78246E-34	1.25136E-31
Diras2	7288.703205	-1.677828556	0.138569475	-12.10821182	9.55546E-34	1.73948E-31
Plcxd3	872.9659973	-2.07675805	0.171574794	-12.10409758	1.00468E-33	1.80486E-31
Grm5	7926.903348	-1.400307546	0.115773957	-12.09518597	1.11988E-33	1.98568E-31
Asic2	1106.390854	-1.806838412	0.151367434	-11.93677108	7.61212E-33	1.33241E-30
Rtn4rl1	2066.480672	-1.780294907	0.150174226	-11.8548632	2.03056E-32	3.50926E-30
Zbtb16	585.0446777	-2.581854133	0.219164415	-11.78044409	4.9233E-32	8.40223E-30
Hlf	214.0185554	-3.369724923	0.287060094	-11.73874389	8.06757E-32	1.35983E-29
Fam19a2	2494.439292	-2.359173852	0.201530044	-11.7063134	1.18313E-31	1.96991E-29
Mpped1	13732.33632	-1.357854062	0.116556526	-11.64974719	2.30141E-31	3.78567E-29
Fat3	5134.335087	-2.314030243	0.198916246	-11.6331888	2.79459E-31	4.54221E-29
Slc17a6	4083.229011	1.478263448	0.127284056	11.61389334	3.50294E-31	5.62655E-29
Pcdh10	5577.101631	-1.735065618	0.150282058	-11.54539432	7.78835E-31	1.23645E-28
Grm3	2287.483303	-1.945623974	0.16900722	-11.51207607	1.14684E-30	1.79975E-28
Arhgef26	2975.338225	-1.66925213	0.146119447	-11.42388751	3.17698E-30	4.92901E-28
Gpc5	382.7995181	-2.67024391	0.234175223	-11.40276019	4.05069E-30	6.21394E-28
Ptprt	1503.067014	-1.954364956	0.171503675	-11.39546984	4.40448E-30	6.68159E-28
Has3	469.0112196	-2.168793426	0.190621851	-11.37746496	5.4151E-30	8.12443E-28
Sphkap	14285.56544	-1.551139524	0.136509912	-11.36283438	6.40328E-30	9.50261E-28
Crhr1	547.0381335	-2.225942986	0.196430245	-11.33197681	9.11246E-30	1.33777E-27
Gria3	479.9302239	-2.46376773	0.219047944	-11.2476186	2.37929E-29	3.4558E-27
Tnr	1147.837786	-2.057869803	0.182979344	-11.24645961	2.41076E-29	3.46464E-27
Syndig1	808.8834471	-2.156835367	0.193393962	-11.15254763	6.95851E-29	9.8963E-27
Pou3f1	915.7517132	-2.018839176	0.181544788	-11.12033674	9.98942E-29	1.40604E-26
Nyap2	3497.621067	1.621110972	0.14580399	11.11842665	1.02056E-28	1.4218E-26
Neto2	2557.357518	-1.929224074	0.173586072	-11.11393359	1.07325E-28	1.48011E-26
Clu	901.9198305	-2.473820771	0.223416431	-11.07268951	1.70214E-28	2.32393E-26
Pcdhgb6	910.6103003	-1.676540635	0.151993653	-11.03033317	2.72852E-28	3.68837E-26
Nr3c1	845.1077324	-2.473815357	0.224445732	-11.02188637	2.99711E-28	4.01173E-26
Arhgap20	8401.658415	-1.543358426	0.140671516	-10.9713641	5.24747E-28	6.9557E-26
Ahi1	9395.41988	1.312320884	0.120014444	10.9346912	7.86734E-28	1.03281E-25
Cenpf	284.0399711	2.650659403	0.244470474	10.84245208	2.16587E-27	2.81625E-25
Npnt	1170.66724	-2.227619821	0.20592815	-10.81746144	2.8455E-27	3.66506E-25
Ephb1	344.152795	-2.914460961	0.27142051	-10.73780668	6.7632E-27	8.62972E-25
Cnksr2	21043.07243	-1.48386167	0.138373599	-10.72358946	7.88814E-27	9.97192E-25
Nlgn1	6933.385608	-1.240360081	0.115774578	-10.71357899	8.78966E-27	1.10097E-24
Ddn	8549.921822	-1.575607206	0.147858189	-10.65620524	1.63118E-26	2.02459E-24
Pknox2	3519.982898	-1.565248259	0.147013766	-10.64695029	1.80171E-26	2.21611E-24
Plk2	7269.507635	-1.414578077	0.133142887	-10.62451106	2.2921E-26	2.79411E-24
Trpv6	492.8317928	-2.325806957	0.219244157	-10.60829619	2.72676E-26	3.29455E-24
Grm8	196.6515792	-3.103676984	0.292903204	-10.59625483	3.10153E-26	3.71449E-24
Sstr1	1655.042411	-2.457175729	0.232051878	-10.58890687	3.35487E-26	3.98296E-24
Kcnj2	721.8532397	-1.807943084	0.171821855	-10.52219511	6.82643E-26	8.0346E-24
Wnt7b	1709.86297	-2.103414744	0.199977859	-10.51823817	7.11923E-26	8.3076E-24
Nnat	17333.06337	-1.565067094	0.148874212	-10.51268099	7.55157E-26	8.73742E-24
Prr16	109.5750922	-3.453262552	0.329236369	-10.48870318	9.73554E-26	1.11697E-23
Dpp10	1034.677173	-1.885306262	0.181605273	-10.38134098	3.0151E-25	3.43043E-23
Nr3c2	440.0007358	-2.38160971	0.22997019	-10.35616708	3.92372E-25	4.42731E-23
Ccbe1	593.9535202	-2.442291736	0.237289751	-10.29244509	7.6216E-25	8.52932E-23
Slco3a1	1776.98192	-1.428538965	0.138829246	-10.2898993	7.82582E-25	8.68666E-23
Brinp3	382.0576355	-2.707342174	0.263515316	-10.27394617	9.23481E-25	1.0168E-22
Vim	232.1360176	-3.126110043	0.305328424	-10.2385163	1.33264E-24	1.45557E-22
Myc	481.218295	-1.86848399	0.18293367	-10.21399719	1.71645E-24	1.85989E-22
Mcc	655.0999764	-2.000517487	0.197016178	-10.15407724	3.17802E-24	3.4165E-22
Cntn3	473.2642953	-2.025004635	0.200215272	-10.1141367	4.78214E-24	5.10083E-22
Pcdhga12	909.8501407	-2.05597185	0.203700852	-10.09309403	5.92713E-24	6.2731E-22
Kctd16	957.8852212	-2.324967715	0.230375534	-10.0920774	5.98885E-24	6.28967E-22
Pcdhgb7	438.4922973	-2.179342432	0.216150106	-10.08254158	6.59965E-24	6.87825E-22
Cntnap4	509.2692473	-2.13812733	0.213569206	-10.01140273	1.35813E-23	1.40474E-21
Syt1	14788.67718	-1.10396029	0.110307559	-10.00802032	1.40537E-23	1.44267E-21
Stxbp5l	3076.73992	-1.435439697	0.143568021	-9.998324713	1.54997E-23	1.57923E-21
Pcdhgc3	7644.565121	1.593558763	0.159812874	9.971404174	2.03334E-23	2.05638E-21
Kirrel3	3022.688155	1.509245741	0.152030485	9.927257299	3.16851E-23	3.18086E-21
Avpr1a	198.1432449	-3.27298372	0.331564373	-9.871337166	5.54208E-23	5.52307E-21
D430036J16Rik	92.34648488	-3.150365481	0.319978139	-9.845564739	7.16358E-23	7.08727E-21
Zfp608	2041.543152	1.716451813	0.17579367	9.76401378	1.60668E-22	1.57813E-20
Ptk2b	2378.595434	-1.411531396	0.145054961	-9.731010848	2.22372E-22	2.1686E-20
Ngef	2794.772843	-1.388610081	0.142813466	-9.723243307	2.40012E-22	2.32403E-20
Sdk1	220.7786256	-2.385167056	0.245499462	-9.715569398	2.58798E-22	2.48829E-20
Slit2	1869.640335	-1.827427958	0.18827593	-9.706115698	2.83952E-22	2.71105E-20
Unc5d	3074.906498	-1.510794019	0.156569687	-9.649339236	4.94735E-22	4.6907E-20
Lhfp	290.5312076	-2.41852012	0.251036297	-9.634145141	5.73675E-22	5.38123E-20
Ramp3	95.58847247	-3.302362852	0.34278823	-9.633828024	5.75449E-22	5.38123E-20
Cntn4	89.95293439	-3.079046918	0.319780047	-9.628639894	6.05253E-22	5.62144E-20
Prex1	1747.420261	-1.668302838	0.173753302	-9.601560491	7.87431E-22	7.26405E-20
Id2	2143.844823	-1.820261143	0.189982174	-9.581220734	9.59046E-22	8.78782E-20
Kcnd2	3582.211292	-1.361457839	0.14220941	-9.573612863	1.03234E-21	9.39633E-20
Vsnl1	16173.62078	-1.332174331	0.139251332	-9.566690018	1.10383E-21	9.98053E-20
Sema3a	3914.68666	-1.801713125	0.189024429	-9.531641661	1.54815E-21	1.39059E-19
L3mbtl3	4440.470805	-1.669333845	0.175524446	-9.510549016	1.89659E-21	1.69243E-19
Il1rapl2	60.35435647	-3.337315987	0.352693954	-9.462356676	3.0108E-21	2.66925E-19
Islr2	11818.4011	1.183652291	0.125099703	9.461671504	3.03059E-21	2.66946E-19
Il1rap	122.6985728	-2.984587723	0.316076657	-9.442607223	3.63617E-21	3.18235E-19
Fgfr2	208.7614903	-2.927536308	0.310281484	-9.435098321	3.90628E-21	3.39697E-19
Tes	1314.100223	-1.515362269	0.160718796	-9.428656164	4.15376E-21	3.58933E-19
Arhgap29	483.5593263	-2.313688883	0.24587478	-9.410029306	4.95999E-21	4.25904E-19
Slit3	725.9498007	-2.048885255	0.218135513	-9.392717524	5.84718E-21	4.98947E-19
B3galt2	1887.195969	-1.742966043	0.185867101	-9.377485484	6.75648E-21	5.72958E-19
Spon1	197.0504349	-2.836473143	0.303274837	-9.35281402	8.53462E-21	7.19279E-19
Fstl1	1370.349364	-1.916914438	0.205029079	-9.349475934	8.80831E-21	7.3779E-19
Pcdh11x	4096.669545	-2.759454512	0.296043066	-9.321125288	1.15113E-20	9.58315E-19
Chst15	845.6087977	-1.42606672	0.153118321	-9.31349504	1.23694E-20	1.02351E-18
Kif26a	99.52652638	-2.96778486	0.319105776	-9.300316948	1.40028E-20	1.15169E-18
Smarca2	10259.84268	-1.067572252	0.114824685	-9.297410688	1.43907E-20	1.17651E-18
Rasal1	1050.084901	-1.682110894	0.181216817	-9.282311204	1.65841E-20	1.34776E-18
Wscd1	2496.138872	-1.419756192	0.153179617	-9.26857126	1.88656E-20	1.52409E-18
Slc1a2	10141.60233	1.077589226	0.11641702	9.256285922	2.11667E-20	1.69993E-18
Rspo3	1361.89937	1.551948717	0.168256275	9.223719692	2.86969E-20	2.2781E-18
Rasgrf2	8820.426756	-1.06226446	0.115166724	-9.223709939	2.86995E-20	2.2781E-18
Csgalnact1	633.2809259	-1.751221168	0.189996771	-9.217110146	3.05215E-20	2.40873E-18
Chn2	2307.940776	-1.495398599	0.162474065	-9.203921888	3.45118E-20	2.70799E-18
Cdh7	107.4695429	-3.176154951	0.345121148	-9.203014574	3.48046E-20	2.71535E-18
Ntng1	271.160153	-2.623562604	0.286281605	-9.164272371	4.98824E-20	3.86957E-18
Pcdhga2	897.0431196	-1.656984922	0.180994039	-9.154914313	5.4401E-20	4.19625E-18
Fam84b	276.5100848	-2.619807382	0.287115218	-9.124585594	7.20112E-20	5.52342E-18
Nrgn	5706.563886	-1.798568213	0.198479268	-9.061743493	1.28382E-19	9.79216E-18
Masp1	568.8485633	2.162032558	0.239097067	9.042488824	1.53145E-19	1.1616E-17
Cntn6	965.0595607	-3.164785938	0.351358183	-9.007292543	2.11206E-19	1.59315E-17
Gabra5	7635.342738	-1.294222179	0.143768013	-9.00215669	2.21326E-19	1.66031E-17
Shisa9	1796.428359	-1.508942051	0.167720502	-8.996765666	2.32465E-19	1.73434E-17
Rgma	2629.306926	-1.541119216	0.171814029	-8.969693725	2.9734E-19	2.2063E-17
Stag1	1894.363393	1.260220515	0.140770763	8.952288708	3.48187E-19	2.56962E-17
Tbc1d5	3679.313439	-1.471641243	0.164407286	-8.951192366	3.51663E-19	2.58132E-17
Rorb	3783.430046	-3.133995365	0.350201328	-8.949124738	3.58312E-19	2.61606E-17
Nrsn1	566.7381532	-2.327591554	0.260428343	-8.937550838	3.97891E-19	2.88958E-17
Pde2a	6789.931077	-1.117900279	0.125154587	-8.932155894	4.17786E-19	3.01801E-17
Pcdhb17	771.1175448	-1.925632356	0.2156457	-8.929611648	4.27507E-19	3.07197E-17
Dab1	5931.851426	-0.998111777	0.11197696	-8.913545922	4.94259E-19	3.53305E-17
Tox	473.2638203	-2.27185827	0.255589129	-8.888712448	6.18211E-19	4.39606E-17
Gm13749	120.822075	2.937628527	0.330556728	8.886911924	6.28308E-19	4.44471E-17
Hs3st4	179.0077542	-2.790284367	0.314950323	-8.859442788	8.04154E-19	5.65933E-17
Ptpru	947.9606049	-2.160700323	0.244200453	-8.848060271	8.90536E-19	6.23512E-17
Itgb8	1093.001834	-1.699709187	0.192891876	-8.811719933	1.2324E-18	8.58469E-17
Serpine2	231.1600966	-2.38225922	0.271627363	-8.770321205	1.78157E-18	1.23471E-16
Shisa6	250.37203	-2.198052452	0.251477408	-8.740556353	2.31965E-18	1.59951E-16
Cdh20	719.9251785	-1.914202006	0.219889638	-8.705285174	3.16777E-18	2.17335E-16
Fst	178.3207408	-2.515475285	0.289488151	-8.689389444	3.64393E-18	2.48753E-16
Arpp21	11188.85582	-1.047172597	0.121205646	-8.639635425	5.63927E-18	3.83049E-16
Gabra1	2131.435883	-1.547494509	0.179900584	-8.601942645	7.8378E-18	5.2975E-16
Nxph2	164.5791381	-2.888209013	0.338072789	-8.543157303	1.30603E-17	8.78388E-16
Tacr3	87.31802136	-2.958383178	0.347356443	-8.516851307	1.6395E-17	1.09726E-15
Slitrk4	1957.681428	-1.285213954	0.15114244	-8.503329429	1.84229E-17	1.22697E-15
Sorcs2	2135.707483	-1.19488376	0.141162087	-8.464622396	2.56984E-17	1.7032E-15
Pcdhgb5	420.2956511	-1.629267656	0.192652616	-8.457023284	2.74289E-17	1.80912E-15
Dlc1	575.8848286	-1.671494163	0.197811576	-8.449930961	2.91475E-17	1.91323E-15
Epha7	1418.611905	-1.418201668	0.168284161	-8.427422165	3.53363E-17	2.30836E-15
Dlgap1	7140.644766	-0.931643628	0.110616182	-8.422308662	3.69137E-17	2.39992E-15
Col6a1	70.94890005	-2.977983906	0.354389726	-8.403132728	4.34723E-17	2.81292E-15
Lrp1b	743.6162165	-1.442345629	0.171948003	-8.388266242	4.93364E-17	3.17731E-15
Irs1	3241.100817	1.222265277	0.145910961	8.376788639	5.43914E-17	3.48641E-15
Ptprk	13133.09942	-1.01548164	0.121303603	-8.371405435	5.69351E-17	3.6324E-15
Satb1	6634.668665	-2.448624053	0.293332992	-8.347591725	6.96689E-17	4.42414E-15
Pcdh19	3893.385655	-1.21204305	0.145484562	-8.331076728	8.01104E-17	5.06364E-15
Mpped2	4228.006462	1.049834143	0.126026413	8.330270732	8.06577E-17	5.07474E-15
Pcdhb16	589.2427657	-1.612088053	0.193867838	-8.315397091	9.14456E-17	5.72709E-15
Ncam2	2921.258249	-1.619480192	0.195467229	-8.285174965	1.17936E-16	7.35239E-15
Mapk4	3380.17753	-1.348638843	0.162947112	-8.276543378	1.26802E-16	7.86924E-15
Cap2	1455.279053	-1.166253264	0.140986464	-8.272093866	1.31627E-16	8.13167E-15
Cemip	1133.593846	-1.886086208	0.229264352	-8.226687637	1.92461E-16	1.18364E-14
Psd3	33642.67886	-1.003525009	0.122052308	-8.222089547	1.99988E-16	1.22441E-14
Klhl5	1585.273006	-1.341748015	0.163672955	-8.197738075	2.44952E-16	1.49301E-14
Tap1	237.4241808	2.15830622	0.263351506	8.195533983	2.49483E-16	1.51386E-14
Abca8a	953.3718995	-1.547032456	0.18914521	-8.17907286	2.86036E-16	1.72799E-14
Ephb3	213.3144193	-2.597693265	0.318952417	-8.144453918	3.80997E-16	2.29152E-14
Calb1	2002.182169	-2.896505457	0.357686908	-8.09787943	5.59255E-16	3.3489E-14
Sh3bp4	1017.465147	-1.840131182	0.227338065	-8.094250227	5.76181E-16	3.4352E-14
Peg3	12191.19286	1.141764077	0.141697758	8.05774273	7.77162E-16	4.6133E-14
Sash1	628.8217029	-1.425241165	0.177307068	-8.038264827	9.11195E-16	5.37006E-14
Lmo3	979.9293515	-1.709938427	0.212729506	-8.038087705	9.12513E-16	5.37006E-14
Pcdha6	435.6980643	-1.683762659	0.209599026	-8.033256134	9.49192E-16	5.56194E-14
Diap3	201.5645252	1.968396876	0.245832172	8.007075973	1.17468E-15	6.8538E-14
Nptx1	987.3809839	-1.681199397	0.210334676	-7.992973042	1.31723E-15	7.65282E-14
Btbd3	1000.081996	-1.310605451	0.164599422	-7.962394018	1.68742E-15	9.76202E-14
Gabrq	174.6696892	2.192426263	0.275402214	7.960815684	1.70909E-15	9.84565E-14
2900055J20Rik	237.5653116	-2.19392413	0.276180586	-7.943802849	1.96075E-15	1.1248E-13
Plxna1	15748.04613	-0.99678853	0.126008038	-7.910515424	2.56325E-15	1.46427E-13
Epha5	9386.577125	1.050192152	0.132779634	7.909286364	2.58869E-15	1.47264E-13
Kcnab1	378.5781307	-2.015535573	0.257283522	-7.833908502	4.72933E-15	2.67923E-13
Chsy3	175.0269437	-2.128196336	0.271868293	-7.828041705	4.95528E-15	2.79564E-13
Kcnip2	274.5536252	-2.004008658	0.256318577	-7.818429252	5.34865E-15	3.00515E-13
Egr3	933.2240523	-1.332915284	0.170545376	-7.815604956	5.46997E-15	3.06072E-13
Neurl1b	4343.859976	-0.928304219	0.118924772	-7.805810381	5.91204E-15	3.29458E-13
Myt1l	14767.24044	1.245328093	0.160563716	7.755974536	8.76676E-15	4.86555E-13
Magi3	3675.460141	-1.211576829	0.156433993	-7.744971568	9.56032E-15	5.2845E-13
Hs6st1	5261.512608	-1.158281224	0.14968159	-7.73830118	1.00754E-14	5.54675E-13
Rbfox1	15484.02603	0.943441152	0.122115082	7.725836434	1.11121E-14	6.09292E-13
Kcnip4	3120.321387	-1.396792827	0.181847829	-7.681108076	1.57718E-14	8.61331E-13
Ptger3	761.7192092	-1.417348367	0.185407752	-7.644493573	2.09769E-14	1.14103E-12
Pcdh7	22024.2425	1.181392081	0.155216693	7.611243731	2.71471E-14	1.46634E-12
Gpr26	1010.897376	-1.189718164	0.156313085	-7.611123308	2.71724E-14	1.46634E-12
Cntnap5b	379.3461326	-2.697807814	0.356861695	-7.559813363	4.03648E-14	2.16641E-12
Caln1	5891.048285	-0.949082389	0.125548315	-7.55949921	4.04624E-14	2.16641E-12
Wasf1	2183.759326	-1.073010441	0.141989533	-7.556968614	4.12571E-14	2.20033E-12
Coch	838.2688868	-1.36073052	0.180699226	-7.530361626	5.06E-14	2.6881E-12
Tpbg	162.7801788	-2.348027105	0.311873984	-7.528768746	5.1221E-14	2.71054E-12
Csmd2	2370.61223	-1.212852851	0.161380667	-7.515478005	5.67034E-14	2.98908E-12
Idnk	861.8349659	1.377390911	0.183683296	7.49872712	6.44405E-14	3.38387E-12
Cntnap3	200.0210743	-2.395173717	0.320281501	-7.478339247	7.52677E-14	3.93432E-12
Gucy1b3	14517.24459	-0.8679615	0.116069673	-7.477935288	7.54994E-14	3.93432E-12
Kcnq5	9927.440263	-1.238793191	0.167228608	-7.40778269	1.28429E-13	6.66705E-12
Ctgf	98.11494227	-2.307232707	0.311902024	-7.397299565	1.38982E-13	7.18757E-12
Pcdhb19	713.5493797	-1.382741613	0.186951429	-7.396261281	1.40072E-13	7.21663E-12
Egfem1	102.2597343	-2.21171686	0.299622156	-7.38168663	1.56297E-13	8.02225E-12
Sstr2	426.1321918	-1.563303176	0.212147004	-7.368961852	1.71962E-13	8.79324E-12
Tmem200c	444.4511669	-1.652102402	0.224320322	-7.364925233	1.77246E-13	9.02963E-12
Klhl13	601.4056641	-1.402040785	0.191493846	-7.321597084	2.45037E-13	1.24368E-11
Prokr2	3448.685131	1.129546296	0.154757096	7.2988336	2.90273E-13	1.46781E-11
Foxp1	4283.55199	-1.249311192	0.171998679	-7.263492949	3.7722E-13	1.90044E-11
Cd99l2	5757.318187	0.826091445	0.113895049	7.253093518	4.07359E-13	2.04473E-11
Neto1	294.8664876	-1.781192248	0.245620141	-7.251816738	4.11218E-13	2.05654E-11
Tmem132b	1200.327668	-1.094001121	0.15088299	-7.250659086	4.14748E-13	2.06663E-11
Klf12	1567.980607	0.973114761	0.13456011	7.231822001	4.76557E-13	2.36597E-11
Zfp521	491.0281443	-1.660551543	0.2299802	-7.220410892	5.18307E-13	2.56393E-11
Pcdha11	320.6426237	-1.695743537	0.23545076	-7.202115377	5.92855E-13	2.92211E-11
Thsd4	407.1005244	-1.934242086	0.269354818	-7.181019072	6.91937E-13	3.39821E-11
Eepd1	170.3585757	-2.213123067	0.308726927	-7.168545636	7.57987E-13	3.70924E-11
Gas1	121.4229699	-2.279282005	0.318066564	-7.166053473	7.71906E-13	3.76387E-11
Lrrn3	5930.048796	-0.941497325	0.131406845	-7.164751006	7.79281E-13	3.78631E-11
Cited2	1097.14703	-2.378609435	0.332256527	-7.158954718	8.12945E-13	3.93587E-11
Mmp16	3199.635096	-0.867801142	0.121347253	-7.151386774	8.59056E-13	4.14441E-11
Cdh11	2376.330819	-1.07210416	0.149998794	-7.147418548	8.8425E-13	4.25094E-11
Fat1	4072.902453	-1.240196954	0.173941668	-7.129958946	1.00399E-12	4.80963E-11
Trim16	88.67487423	-2.290067656	0.322437495	-7.102361513	1.22643E-12	5.8547E-11
Hist1h1a	444.4009056	1.414074861	0.19944519	7.090042428	1.34071E-12	6.37794E-11
Pcdha5	442.8616681	-1.343912584	0.189613212	-7.087652654	1.36406E-12	6.46649E-11
Sdk2	514.8504455	-1.719477068	0.242809747	-7.081581728	1.42518E-12	6.73288E-11
Bcl2l11	129.3336562	-2.307558351	0.327319953	-7.049855433	1.79104E-12	8.43208E-11
Ephb6	2683.867571	-1.192163717	0.169422852	-7.036616989	1.96963E-12	9.24103E-11
Etl4	1629.06472	-1.512992767	0.215104269	-7.033764468	2.01034E-12	9.39973E-11
Layn	626.3163229	1.569497357	0.223586017	7.019657939	2.22412E-12	1.03638E-10
Sulf2	1174.485488	-1.284241859	0.183016431	-7.017085037	2.26545E-12	1.05205E-10
Npas2	467.1873884	-1.286228012	0.184234845	-6.981458964	2.9213E-12	1.35202E-10
Samd4	1276.315393	1.236906241	0.177752316	6.958594232	3.43685E-12	1.58525E-10
Syt13	2458.130307	0.922299658	0.132701052	6.950206075	3.64753E-12	1.67676E-10
Fam174b	2369.466161	0.871850988	0.125737786	6.933882121	4.09446E-12	1.87589E-10
Plec	653.1509956	-1.405929093	0.203121399	-6.921619768	4.46508E-12	2.03886E-10
Fam46a	81.04349338	-2.388130364	0.345195847	-6.918189729	4.57451E-12	2.08186E-10
Rapgef6	1628.878404	0.964272304	0.139451157	6.914767325	4.68632E-12	2.12566E-10
Cdk18	518.4288636	1.31773124	0.190643363	6.912022616	4.77792E-12	2.16003E-10
Inpp5f	14317.59173	1.022490298	0.148058683	6.905979955	4.9858E-12	2.24657E-10
Lrrtm2	1883.034605	-1.02139457	0.147974037	-6.902525521	5.1086E-12	2.29433E-10
Gria1	11528.69941	-0.955216555	0.138559464	-6.893910553	5.42792E-12	2.42975E-10
Ascl1	116.2165259	-2.360822604	0.343351328	-6.875821971	6.16334E-12	2.74994E-10
Pcdhb20	582.3630978	-1.214357002	0.177008046	-6.860462171	6.86381E-12	3.0525E-10
Cxxc4	735.0637465	-1.243686171	0.181318098	-6.859139746	6.92764E-12	3.07088E-10
Slc35f1	5875.795122	-0.804749713	0.117342252	-6.85814104	6.97624E-12	3.08241E-10
Cdh10	1856.780786	-1.000650424	0.146142193	-6.847101455	7.53613E-12	3.31906E-10
Epb4.1l2	2094.01664	-0.881712066	0.128793141	-6.845955124	7.59673E-12	3.33499E-10
Galnt18	403.6561953	-1.857718491	0.271914366	-6.831998312	8.37398E-12	3.66442E-10
Pik3r1	25736.32652	-1.228455769	0.179868537	-6.829742365	8.50673E-12	3.71062E-10
Pcdha7	252.1558657	-1.734058311	0.254336055	-6.817980679	9.23291E-12	4.01455E-10
Ryr3	1112.454674	-1.239984162	0.181948146	-6.815041477	9.42366E-12	4.08448E-10
Syt4	17182.34891	-1.225266599	0.180107	-6.802992649	1.02468E-11	4.4272E-10
Pcdhb15	285.1413082	-1.554614254	0.228561007	-6.801747482	1.03358E-11	4.45155E-10
Itga4	223.2156568	-1.803283064	0.265164032	-6.800632246	1.04161E-11	4.47204E-10
Elmo1	2413.690551	-1.459215768	0.214765669	-6.794455436	1.08722E-11	4.65325E-10
Ankrd45	863.1134707	-1.162883387	0.17155968	-6.778302396	1.21596E-11	5.18798E-10
Samd5	139.7785422	-2.025421861	0.299326894	-6.76658831	1.31855E-11	5.60813E-10
Rprm	532.3454599	-2.363392766	0.349605404	-6.760172293	1.37828E-11	5.84398E-10
Cntnap5a	561.4209947	-1.727621184	0.255615998	-6.758658293	1.39275E-11	5.88708E-10
St8sia4	362.067742	-1.38564817	0.205236006	-6.751486723	1.46338E-11	6.16651E-10
Lancl3	394.5235607	-1.327176929	0.196753362	-6.745383732	1.52623E-11	6.41158E-10
Nrn1	1144.634842	1.220480332	0.181154238	6.737244151	1.61419E-11	6.76028E-10
Oxtr	88.53985792	-2.119822381	0.31586114	-6.711247799	1.92967E-11	8.05682E-10
Tmtc4	1147.279711	-1.064680888	0.158850339	-6.702414959	2.05003E-11	8.53325E-10
Dusp7	2560.049633	-0.85763538	0.128064129	-6.696921179	2.12856E-11	8.83322E-10
Mcu	1874.732732	-0.868611514	0.129750042	-6.694498876	2.16412E-11	8.95355E-10
Utrn	671.1224494	-2.325440593	0.34746618	-6.692566723	2.1929E-11	9.0452E-10
Dgkk	313.7907799	-1.6378121	0.244895557	-6.687798342	2.26553E-11	9.31665E-10
Nxph3	152.6296412	-2.208274448	0.33075675	-6.676430482	2.44832E-11	1.00381E-09
2010300C02Rik	1562.548776	-1.200160124	0.180213199	-6.659668263	2.74446E-11	1.12186E-09
Dusp4	273.3173223	-1.927657329	0.289674551	-6.65456225	2.84144E-11	1.15804E-09
Glra3	59.87599135	-2.336546992	0.353992012	-6.600564176	4.09596E-11	1.66435E-09
Arhgap31	199.6267491	-1.729475723	0.264548658	-6.537457927	6.25732E-11	2.53505E-09
Mef2c	46071.43147	-0.82686988	0.126559314	-6.533457338	6.42685E-11	2.59603E-09
Syt10	514.5591865	-2.323984715	0.357296047	-6.504367281	7.80211E-11	3.14225E-09
Susd5	122.2998234	-2.15565083	0.331758289	-6.497654768	8.15817E-11	3.27599E-09
Shroom3	176.7203009	-1.840961898	0.283730893	-6.488408362	8.67479E-11	3.47322E-09
Naf1	424.5111247	-1.36258309	0.21039283	-6.47637606	9.39517E-11	3.75065E-09
Rasgrf1	1569.060596	-1.218938731	0.188743194	-6.458186409	1.05965E-10	4.21791E-09
Ier5l	31.2838647	-2.308485185	0.358188347	-6.444891929	1.15683E-10	4.59133E-09
Plcb1	13807.89413	-0.944481674	0.1465664	-6.444053146	1.16324E-10	4.60341E-09
Ntrk2	27060.26666	-0.713137448	0.111095062	-6.419164212	1.37025E-10	5.40692E-09
Cacng5	266.4065994	1.664150649	0.259887443	6.403351513	1.52003E-10	5.98067E-09
Prss35	257.7838228	-1.741560807	0.272022381	-6.402270287	1.53083E-10	6.00588E-09
Osbpl3	332.8751838	-1.787182391	0.279246309	-6.400021533	1.55355E-10	6.07754E-09
9430021M05Rik	227.5098079	-1.709237373	0.267674191	-6.385514292	1.70822E-10	6.66354E-09
Sostdc1	367.9047527	1.370687933	0.215102209	6.372263395	1.86259E-10	7.24498E-09
Nap1l5	5013.203994	1.00423097	0.157873799	6.360972982	2.0048E-10	7.77599E-09
Stac	371.1065845	-1.539201488	0.243332085	-6.32551803	2.52384E-10	9.76149E-09
Fzd1	728.9942775	1.325390737	0.210240089	6.304177027	2.89729E-10	1.11742E-08
Sla	6743.580109	0.800680616	0.127297564	6.289834561	3.17804E-10	1.22225E-08
Lifr	4067.505779	0.997389924	0.158735856	6.28333098	3.31394E-10	1.27094E-08
Rnd3	292.6002691	-1.425907849	0.227151514	-6.27734249	3.44409E-10	1.31715E-08
Sntg1	798.8671624	-1.240467572	0.197799009	-6.271353815	3.57922E-10	1.365e-05
Iqgap2	286.1486209	-1.54131692	0.246759378	-6.246234408	4.20466E-10	1.59906E-08
Ism1	114.8322344	-1.846029947	0.29648698	-6.226344052	4.77445E-10	1.81071E-08
Matn2	457.6323312	-1.577306152	0.254625845	-6.194603511	5.84319E-10	2.20989E-08
Cnn3	2022.595296	0.919058374	0.148468756	6.190247688	6.00697E-10	2.26556E-08
Grin2a	1557.900624	-1.069692273	0.172830186	-6.189267613	6.04444E-10	2.27341E-08
Tmem200a	1737.3475	-1.223204029	0.197999947	-6.177799776	6.50011E-10	2.43808E-08
Pcdhb21	156.8605485	-1.684339784	0.272680623	-6.176969108	6.53439E-10	2.44358E-08
Slc24a2	1408.71299	-1.025474386	0.16602629	-6.176578319	6.55057E-10	2.44358E-08
Kcng1	100.8926496	-2.064481999	0.334402514	-6.17364377	6.67338E-10	2.48261E-08
Ptprd	16802.47069	-0.66262502	0.107410932	-6.169064989	6.8695E-10	2.54862E-08
Mgat5	1554.858287	-1.152426703	0.186892236	-6.166263116	6.99227E-10	2.58714E-08
Gpr50	29.81842648	2.203093973	0.357421599	6.163852371	7.09961E-10	2.61976E-08
Pnrc2	1197.874067	0.929734343	0.151339836	6.143355044	8.07964E-10	2.97335E-08
Sgk1	1372.023021	-1.150870134	0.187933179	-6.123826258	9.13545E-10	3.35286E-08
Fam189a1	1207.443623	-1.198241277	0.195752563	-6.121203527	9.28712E-10	3.39199E-08
Pcsk6	262.174068	-1.675901643	0.273789865	-6.121123748	9.29177E-10	3.39199E-08
Pcdhb18	606.4082199	-1.186566815	0.193928386	-6.118582422	9.44114E-10	3.43733E-08
Pmp22	47.67532926	-2.192049262	0.358545959	-6.113719061	9.73356E-10	3.53437E-08
Gm3893	377.0404288	-1.381551475	0.226601871	-6.096822897	1.08197E-09	3.91835E-08
Ctnna1	386.3312502	-1.469899106	0.241251859	-6.092799095	1.10953E-09	4.00753E-08
Hs6st3	972.7880608	-1.134112054	0.186312996	-6.087133364	1.1495E-09	4.14094E-08
Xkr4	4490.376291	0.717246775	0.11784334	6.086443025	1.15447E-09	4.14788E-08
Laptm4a	3451.983536	0.866031451	0.142423034	6.08069797	1.19661E-09	4.28799E-08
Fam160a1	152.2438103	-1.604813746	0.26407501	-6.077113266	1.22365E-09	4.37344E-08
Cblb	1283.830406	-0.882570535	0.145244276	-6.076456556	1.22867E-09	4.37991E-08
Ybx3	1448.368194	-1.035977145	0.170769033	-6.066539861	1.30695E-09	4.64683E-08
Myo3b	95.16706885	1.93147324	0.318481067	6.064640703	1.32249E-09	4.68986E-08
Khdrbs3	4452.856898	-0.725603918	0.119770644	-6.058278502	1.37586E-09	4.86648E-08
Khdrbs2	469.5711245	-1.38281365	0.228324654	-6.056348386	1.39246E-09	4.91248E-08
Efnb1	927.3095456	-1.093889097	0.180863295	-6.048154209	1.46515E-09	5.15558E-08
Disp2	6285.642923	0.751805727	0.124502553	6.038476399	1.55576E-09	5.46036E-08
Tgfa	275.642276	-1.494998731	0.247762872	-6.033990167	1.5996E-09	5.59982E-08
Gria4	1773.418641	-0.87197149	0.144569653	-6.031497436	1.62447E-09	5.67236E-08
Trpc5	465.1550056	-1.245632298	0.206552117	-6.030595658	1.63356E-09	5.68955E-08
Dpy19l1	414.8421806	-1.393175983	0.231327384	-6.022529454	1.71712E-09	5.96536E-08
Gprc5b	96.31827057	-2.009123926	0.333846148	-6.018113257	1.76462E-09	6.1148E-08
Gpx8	119.1433371	1.909289108	0.317691851	6.009877512	1.85664E-09	6.41738E-08
Rnf150	1960.132273	0.833062592	0.138692729	6.006533992	1.89531E-09	6.53452E-08
Acvr1c	232.9555284	-1.746581054	0.290957267	-6.002878274	1.9385E-09	6.66658E-08
St8sia2	5221.177534	-0.730026418	0.121755423	-5.995843123	2.02432E-09	6.94424E-08
Trpm3	3880.47613	0.930588219	0.155405008	5.988148191	2.12244E-09	7.26256E-08
Etv1	408.8467689	-2.134806676	0.35776248	-5.967106099	2.41498E-09	8.24294E-08
Faim2	2386.090675	0.871192688	0.146166003	5.960296307	2.51781E-09	8.57248E-08
Hcn1	1999.879589	-1.318171009	0.221438432	-5.952765284	2.63649E-09	8.95424E-08
Galntl6	251.7288763	-1.325937694	0.222926151	-5.947878645	2.7164E-09	9.20273E-08
Gabra2	2012.08015	-1.248675629	0.210071887	-5.944039653	2.78082E-09	9.39767E-08
Bmp3	278.866573	-1.751839593	0.295148047	-5.935460564	2.93022E-09	9.87809E-08
Slc24a4	288.9473233	-1.752732277	0.295411196	-5.933195158	2.97095E-09	9.99075E-08
Hap1	3549.594956	0.957417975	0.161455132	5.929932137	3.0306E-09	1.01663E-07
Pcdhga5	827.8734431	-0.940065954	0.15918247	-5.905587164	3.51393E-09	1.17587E-07
Nbea	18926.85445	-0.754664459	0.127807468	-5.904697688	3.53294E-09	1.17935E-07
Slc20a1	2187.542646	-0.903448475	0.153397701	-5.889582878	3.87172E-09	1.28928E-07
Zbtb20	1302.495806	1.157181832	0.196729566	5.88209417	4.05108E-09	1.34573E-07
Tmem191c	420.0674169	-1.177079379	0.200163034	-5.880603209	4.08774E-09	1.35461E-07
Parva	1423.906959	0.994206366	0.169088617	5.879794787	4.10775E-09	1.35795E-07
Ndst3	146.4430833	-1.825558875	0.310998439	-5.869993693	4.35812E-09	1.43723E-07
Bai3	4754.626086	-0.768720853	0.131076924	-5.864654372	4.50069E-09	1.48067E-07
Cacna1e	8104.567682	-0.831097496	0.141804911	-5.860851291	4.605e-06	1.51135E-07
Nek6	1588.79677	0.8499719	0.14515916	5.855447897	4.75726E-09	1.55758E-07
Cpxm2	93.2500938	1.81617977	0.310561306	5.848055556	4.97352E-09	1.62449E-07
Zswim7	221.9154372	1.540828175	0.263519317	5.847116618	5.00167E-09	1.62978E-07
Htr1b	48.13527334	-2.088491769	0.357289146	-5.845382626	5.05405E-09	1.64293E-07
Scube1	3914.795117	-0.953724801	0.163255393	-5.841919125	5.16029E-09	1.67348E-07
Gpr123	1970.292987	1.001980985	0.171627715	5.838107112	5.27972E-09	1.70815E-07
Jam2	120.3113245	-1.824257339	0.312760777	-5.832756134	5.45192E-09	1.75969E-07
Adamts3	1193.129429	-1.277152791	0.219163774	-5.827390029	5.63009E-09	1.81292E-07
Tmem132a	9687.291906	-0.783330361	0.134716808	-5.814644618	6.07628E-09	1.95199E-07
Smyd3	1283.382398	0.904814033	0.155643484	5.813375615	6.12255E-09	1.96223E-07
Dgkg	1099.465272	-1.158010818	0.199254646	-5.811713006	6.18368E-09	1.97718E-07
Prrg1	64.58640065	1.951691983	0.336013165	5.80837951	6.30804E-09	2.01224E-07
Rgs7	5390.321532	-0.791617278	0.136538413	-5.797762409	6.72056E-09	2.13883E-07
Eml2	4898.257772	0.78857486	0.136045834	5.796391082	6.77572E-09	2.15137E-07
Pcdhac2	3282.444118	0.877705475	0.151488395	5.793879288	6.87789E-09	2.17874E-07
Cacna1h	1567.119482	-0.776281604	0.134266744	-5.78163721	7.39771E-09	2.33798E-07
Trabd2b	28.81262425	-2.057338438	0.356131423	-5.776907913	7.60859E-09	2.39908E-07
Nol4	4972.047172	0.697539252	0.120951346	5.767106173	8.06443E-09	2.53695E-07
Calm1	152715.0466	-0.753136651	0.130746944	-5.76026199	8.39835E-09	2.63592E-07
Adcy1	26822.43395	-0.709802683	0.123818888	-5.732588104	9.89096E-09	3.09728E-07
Tmem229a	570.192466	1.126708143	0.196679421	5.728652925	1.01231E-08	3.16272E-07
Zmat4	102.2407592	-1.932649433	0.337594794	-5.724760775	1.0358E-08	3.2287E-07
Fam155a	2288.156254	0.74687743	0.130547802	5.721103085	1.05835E-08	3.29148E-07
Cdh8	2625.172194	-0.959532533	0.167730496	-5.720680226	1.06098E-08	3.29219E-07
Isyna1	593.2859857	-1.006244664	0.176129523	-5.713094823	1.1094E-08	3.43461E-07
Carhsp1	4330.641294	0.839131483	0.147538936	5.687525664	1.28893E-08	3.9814E-07
Colgalt2	139.5552446	-1.75215728	0.308260676	-5.684011673	1.31571E-08	4.05495E-07
Vgll4	908.0070502	-1.040893393	0.183222713	-5.681028151	1.33887E-08	4.11704E-07
Cntnap5c	128.4360797	-1.728178387	0.304663002	-5.672426183	1.40789E-08	4.31954E-07
Rab3c	9095.931529	-0.665082372	0.117911833	-5.640505764	1.69551E-08	5.19033E-07
Slitrk5	5752.862779	-0.705981458	0.125184633	-5.639521741	1.70523E-08	5.20839E-07
Sepp1	96.002468	1.7228181	0.305526562	5.638848839	1.71191E-08	5.21711E-07
Chrm4	738.4515215	-1.02095609	0.181084852	-5.637998311	1.72038E-08	5.23126E-07
Tmx4	8338.939511	0.612581197	0.108832801	5.628644959	1.81631E-08	5.51068E-07
Stk32b	941.2157502	1.052505081	0.187112779	5.624977021	1.85533E-08	5.61658E-07
Pcdha9	185.4445556	-1.492722689	0.265662386	-5.618871049	1.92209E-08	5.80582E-07
Pcdha3	451.5907967	-1.069261473	0.190433765	-5.61487336	1.96706E-08	5.92854E-07
Dpy19l3	653.4464398	-1.012567543	0.18038022	-5.613517611	1.98254E-08	5.96204E-07
Gnpda1	757.4696046	0.972099238	0.173405181	5.605941132	2.07126E-08	6.21516E-07
Gjc1	445.224824	-1.138490285	0.203136435	-5.604559727	2.08785E-08	6.25119E-07
Igsf21	2411.86979	-0.78236904	0.140055803	-5.586123684	2.32194E-08	6.93686E-07
Pde10a	6541.577287	0.668139782	0.11965639	5.583820309	2.35292E-08	7.01406E-07
Mar-01	4706.940718	-0.803352616	0.144158071	-5.572720363	2.50792E-08	7.45983E-07
Tll1	55.8323955	-1.945729105	0.349641702	-5.564922877	2.62268E-08	7.78424E-07
Pcdhga11	2105.684835	-0.803815735	0.144583369	-5.559531088	2.705e-05	8.01115E-07
Pkib	108.7402665	-1.927574201	0.346981371	-5.555267118	2.77188E-08	8.19143E-07
Chodl	75.23372337	-1.865324033	0.336934283	-5.536165734	3.09165E-08	9.1167E-07
Tmem131	6092.804059	-0.79123041	0.143047049	-5.53125992	3.17939E-08	9.35521E-07
Swap70	335.3163687	-1.699881753	0.307404776	-5.529783152	3.20627E-08	9.41402E-07
Arhgap28	150.8169754	-1.63106467	0.294992049	-5.529181808	3.21728E-08	9.42607E-07
Sntg2	114.9587723	-1.772013846	0.32116532	-5.517450776	3.43952E-08	1.00556E-06
Dcc	2273.481966	-0.888413048	0.161112286	-5.514247672	3.50275E-08	1.02186E-06
Creg1	969.0104005	0.842769006	0.15305823	5.506198552	3.66665E-08	1.06739E-06
Flrt2	2118.705329	-0.949523391	0.172841866	-5.493596036	3.93831E-08	1.14178E-06
Lmcd1	135.3927639	1.695164742	0.308572515	5.493570102	3.93889E-08	1.14178E-06
Klhl14	232.6042786	1.691169378	0.307956381	5.491587388	3.98337E-08	1.15222E-06
Epha3	2539.026153	0.965399919	0.176165056	5.480087494	4.25116E-08	1.22708E-06
Crb1	193.8096938	1.43550878	0.262137555	5.476166055	4.3464E-08	1.25193E-06
Nfia	1011.108177	0.81721404	0.149362005	5.471364961	4.46583E-08	1.28362E-06
Fam101b	955.4570821	-0.950595258	0.173953907	-5.46463872	4.63851E-08	1.33045E-06
Mxi1	1320.341224	0.847789687	0.155204939	5.462388594	4.6977E-08	1.34461E-06
Dock5	412.2730485	1.485199942	0.272461332	5.451048532	5.00737E-08	1.43024E-06
Slc8a3	1221.632483	0.897408315	0.164687218	5.449167969	5.0606E-08	1.44243E-06
Zeb2	14638.0517	0.685441209	0.125834788	5.447151921	5.11827E-08	1.45583E-06
Mchr1	121.653528	-1.623049077	0.298899095	-5.430090296	5.63255E-08	1.59878E-06
Nipal3	3668.487316	0.825238077	0.152163102	5.423378372	5.8483E-08	1.65657E-06
Tex15	189.0184726	-1.609727546	0.296962832	-5.420636433	5.93872E-08	1.6787E-06
Adcy5	5841.277341	0.667815224	0.123329576	5.414882997	6.13288E-08	1.73E-06
Enc1	16342.70544	-1.013300173	0.187517247	-5.403770524	6.52544E-08	1.83695E-06
Macrod2	2710.035238	-0.726932036	0.134738469	-5.395133568	6.84726E-08	1.92357E-06
Camk2d	3583.333478	-0.89424109	0.165889918	-5.390569258	7.02348E-08	1.96903E-06
Nedd9	2932.917504	-0.693163065	0.128809574	-5.381300801	7.39495E-08	2.06892E-06
Dzank1	2088.040767	0.728406486	0.135633403	5.370406323	7.85594E-08	2.1934E-06
AI504432	1137.108246	0.834401811	0.155784265	5.356136637	8.50202E-08	2.36894E-06
Pcdh15	341.6835191	-1.373509226	0.256550526	-5.353757201	8.61464E-08	2.39543E-06
Lmtk2	10709.15264	-0.593792049	0.111071922	-5.346014	8.99123E-08	2.49507E-06
Spock3	1045.011569	-1.197516644	0.224093246	-5.343831937	9.10019E-08	2.52018E-06
Brinp2	3272.150958	-0.992852326	0.185918819	-5.340246511	9.28203E-08	2.56533E-06
Pcdhga1	613.3921282	-1.025686668	0.192250853	-5.335147542	9.54669E-08	2.63315E-06
A930017M01Rik	579.5568224	0.949821578	0.178385384	5.324548218	1.01204E-07	2.78577E-06
Cxx1c	1090.417769	-0.862232291	0.162393146	-5.309536229	1.09905E-07	3.01917E-06
Arhgef3	509.1410357	-1.085337737	0.204712715	-5.301760257	1.14691E-07	3.14434E-06
Rhoq	439.4942784	1.060344014	0.200100842	5.299048239	1.16408E-07	0.003185
Nkrf	1913.193836	0.740417992	0.139972132	5.289752914	1.22482E-07	3.34449E-06
Sipa1l2	2552.577803	0.723655262	0.136845026	5.288137137	1.23568E-07	3.36742E-06
Zbtb34	802.0065381	-0.938413395	0.177521754	-5.286188155	1.24891E-07	3.3967E-06
Pcdhgb1	609.6768493	-1.116840793	0.211490017	-5.280820383	1.28607E-07	3.49079E-06
Hif3a	82.91962509	-1.800187316	0.341170624	-5.276501522	1.31673E-07	3.56694E-06
BC049635	239.1611991	-1.450834941	0.275452484	-5.267096967	1.38598E-07	3.74709E-06
Wfs1	1350.444463	0.909790331	0.172955732	5.260249656	1.4386E-07	3.88166E-06
Prkg2	83.49758963	-1.725202567	0.328042721	-5.259078938	1.44779E-07	3.89875E-06
Tmem178	643.3973935	0.958179678	0.182714886	5.244124877	1.57026E-07	4.22022E-06
Zim1	463.1958757	-1.116322482	0.213416668	-5.230718356	1.68853E-07	4.52916E-06
Susd1	132.1085121	-1.726048794	0.330050822	-5.229645496	1.69835E-07	4.54659E-06
Ildr2	4521.640793	-0.591227802	0.113209793	-5.222408629	1.76611E-07	4.71872E-06
Prkd1	76.79337524	-1.734516807	0.332217652	-5.221025422	1.77935E-07	4.74482E-06
Tspan7	16226.09528	0.560782734	0.107544897	5.214405817	1.84407E-07	4.90782E-06
Cntn2	2637.199749	1.000297726	0.191853132	5.213872288	1.84939E-07	4.91239E-06
Atp2b1	25301.16687	-0.596494729	0.11464227	-5.203095938	1.95996E-07	5.19598E-06
Npc2	1768.179244	0.824210044	0.158625006	5.195965399	2.0366E-07	5.38871E-06
Rap2a	7871.276588	-0.62668312	0.120942749	-5.181651031	2.1993E-07	5.80795E-06
Wscd2	1246.928255	-0.748214111	0.14464386	-5.172802451	2.30609E-07	6.07625E-06
9430020K01Rik	2263.991839	-1.034362885	0.19997342	-5.172501842	2.3098E-07	6.07625E-06
Zhx2	809.0864869	0.915010887	0.177022615	5.168892621	2.35485E-07	6.18284E-06
Adrbk2	1427.550564	-0.941657598	0.18241722	-5.162109138	2.44183E-07	6.3989E-06
Pcdhgc4	4022.237923	0.802783886	0.155609788	5.158954947	2.48332E-07	6.49517E-06
Xxylt1	633.7626937	0.965060861	0.187480802	5.147518325	2.63955E-07	6.89059E-06
Sox1	123.7529772	-1.626805747	0.316174602	-5.145276499	2.67127E-07	6.96009E-06
Camta1	11255.87113	0.613908957	0.119337522	5.144307902	2.68509E-07	6.98276E-06
Cbfb	1287.675268	0.772470948	0.150426524	5.135204398	2.81838E-07	7.31545E-06
Sptbn2	25232.20451	-0.622612285	0.121371805	-5.129793418	2.9006E-07	7.5146E-06
Sh3rf3	8777.813064	-0.686902896	0.1340322	-5.124909496	2.97681E-07	7.69741E-06
Postn	60.10097105	1.783176615	0.348106411	5.122504378	3.01504E-07	7.78154E-06
Crabp1	45.43231845	-1.834232663	0.358511597	-5.116243593	3.1168E-07	8.02901E-06
Htr1a	575.0932812	-1.794501265	0.350976739	-5.112878052	3.17287E-07	8.15804E-06
Pcdhb7	920.1908912	-0.965320318	0.188890927	-5.110464198	3.21368E-07	8.24744E-06
Itgb4	50.47035192	-1.828428194	0.358428794	-5.101231335	3.37451E-07	8.64393E-06
Tchh	123.2124145	1.626820647	0.319517371	5.091493593	3.55254E-07	9.08292E-06
Gpm6a	81516.44081	0.708630353	0.139218768	5.090049016	3.57971E-07	9.13529E-06
Mmab	3548.058804	0.740032223	0.145459241	5.087557312	3.62705E-07	9.23882E-06
Chst1	2289.660533	-0.811127789	0.159757406	-5.077246874	3.82943E-07	9.73617E-06
Fam150b	38.2446236	-1.818748711	0.358543351	-5.072604771	3.92407E-07	9.95824E-06
Micu1	2017.029287	-0.631588882	0.124632431	-5.067612632	4.02836E-07	1.02039E-05
Tgfb1i1	768.464946	-1.109675212	0.219674626	-5.051449201	4.38471E-07	1.1086E-05
1110032F04Rik	156.1325627	-1.476467832	0.292617374	-5.04572853	4.51797E-07	1.14018E-05
Sez6l	4712.957454	-0.86858034	0.172216677	-5.043532098	4.57016E-07	1.15123E-05
Usp43	853.3418585	-1.053429387	0.209454202	-5.029402015	4.92012E-07	1.2371E-05
Phf21a	2160.88996	-0.753484241	0.150149675	-5.018220916	5.21522E-07	1.30889E-05
Rwdd2a	925.8866657	0.990057497	0.197687166	5.00820321	5.49405E-07	1.37634E-05
Hmgcll1	233.1941827	-1.30433929	0.260475366	-5.007534157	5.51318E-07	1.3786E-05
Hlcs	342.3498998	0.989240253	0.197725912	5.003088586	5.6419E-07	1.40821E-05
Cadps2	2390.571298	-1.669156435	0.333973229	-4.997874956	5.79656E-07	1.44417E-05
Zfp281	1595.0785	-0.720007387	0.144133638	-4.995415356	5.87093E-07	1.46003E-05
Scara3	138.3399594	-1.595154987	0.319418956	-4.993927121	5.91637E-07	1.46866E-05
Cdc42ep3	1199.076096	-0.806716461	0.161591344	-4.992324735	5.96568E-07	1.47821E-05
Zfp804b	51.69541078	-1.718535047	0.344377852	-4.990260073	6.02981E-07	1.49139E-05
Kcnf1	3113.217028	-0.718285873	0.143947769	-4.989906265	6.04086E-07	1.49143E-05
Lancl2	10640.31621	0.583295484	0.116932598	4.988305181	6.09113E-07	1.50112E-05
G2e3	351.111475	-1.120753394	0.225259577	-4.975386205	6.51177E-07	1.60189E-05
Pcdhga4	982.2217293	-0.880815963	0.177103743	-4.973446335	6.5773E-07	1.61511E-05
Cdh13	14348.95146	-0.686772035	0.138417685	-4.9615917	6.99178E-07	1.71115E-05
Klf14	28.72863443	-1.736721194	0.350036388	-4.961544719	6.99348E-07	1.71115E-05
Tprkb	1881.318587	0.695322388	0.140180105	4.960207367	7.0418E-07	1.71989E-05
Otogl	361.1340136	1.405414359	0.283488752	4.957566565	7.13816E-07	1.73652E-05
D8Ertd82e	1072.476197	-1.209382612	0.243959585	-4.95730723	7.14769E-07	1.73652E-05
Pcdhgb2	507.1709308	-0.986783454	0.199056748	-4.95729718	7.14806E-07	1.73652E-05
Col19a1	191.6638052	-1.2601706	0.254511108	-4.951338311	7.37048E-07	1.78738E-05
Hibadh	691.5193487	0.805388907	0.162737768	4.948998109	7.45965E-07	1.80579E-05
Pcdh8	9199.807033	0.695698228	0.140808037	4.940756529	0.0007782	1.88049E-05
Spry1	380.5941594	-1.249715928	0.253125627	-4.937137113	7.92777E-07	1.91233E-05
Ccdc91	1653.812827	0.752940754	0.15261309	4.933657737	8.07038E-07	1.9433E-05
Nxph1	96.15588482	-1.611658182	0.326776774	-4.931985105	8.13981E-07	1.95656E-05
Nab2	201.185145	-1.237748459	0.251481633	-4.921824484	8.57411E-07	2.05733E-05
Itga9	58.47357336	-1.70793233	0.347855504	-4.909890202	9.11274E-07	2.18274E-05
Jun	2591.97605	0.825119179	0.168091324	4.908755303	9.16563E-07	2.19156E-05
Spcs3	770.9976908	-0.910872127	0.185633062	-4.906842118	9.25545E-07	2.20917E-05
Igsf9	782.0272003	-0.801823767	0.163451784	-4.90556755	9.31576E-07	2.21969E-05
Sec24d	1102.687771	0.971533969	0.198132261	4.903461782	9.41623E-07	2.23972E-05
Piezo2	70.71538329	-1.67314247	0.341502883	-4.899350936	9.61538E-07	2.28311E-05
Asap2	2656.363609	0.679480258	0.138813657	4.894909287	9.83511E-07	2.33123E-05
Eda	395.4494676	-0.954903704	0.195285943	-4.889771842	1.00953E-06	2.38875E-05
CK137956	155.6039446	-1.509526189	0.308737254	-4.889355498	1.01167E-06	2.38967E-05
Ust	1917.634381	0.789430207	0.161574264	4.885866036	1.02975E-06	2.42819E-05
Klhl34	624.8605727	-0.882669572	0.180686748	-4.885081945	1.03386E-06	2.43367E-05
Col6a3	426.964867	1.068085767	0.218751083	4.88265361	1.04668E-06	2.4596E-05
Cpeb4	7173.967291	-0.568317715	0.116470774	-4.879487754	1.06362E-06	2.49511E-05
Mpp1	625.7575403	-0.833202363	0.170815757	-4.877783968	1.07284E-06	2.51244E-05
C1ql3	262.1350534	-1.150002429	0.23591241	-4.874700873	1.08973E-06	2.54763E-05
Bmp2	60.35069108	-1.746045611	0.358509999	-4.870284275	1.11438E-06	2.60079E-05
Grn	2500.137312	0.730117295	0.14998035	4.868086346	1.12684E-06	2.62539E-05
Fzd7	88.13030456	-1.577932894	0.324302343	-4.865622861	1.14097E-06	2.65377E-05
Zdhhc2	2461.341679	0.684595659	0.141076684	4.852649227	1.21823E-06	2.82866E-05
Cyb5r3	6275.84116	0.595543242	0.122764807	4.851090947	1.22784E-06	2.84613E-05
Adamts12	33.4568012	1.737339083	0.358423807	4.847164305	1.25239E-06	2.89811E-05
Dnah5	1198.895149	0.717959137	0.148306627	4.841045535	1.29158E-06	2.97652E-05
Stam2	3121.423794	0.6411356	0.132438603	4.841002429	1.29186E-06	2.97652E-05
Grik2	1409.624119	-0.729869325	0.150772785	-4.840855893	1.29281E-06	2.97652E-05
Strip2	303.1615662	-1.469025359	0.303705348	-4.837008533	1.31808E-06	3.02958E-05
Map3k9	8295.365954	0.595699602	0.123195589	4.835397149	1.3288E-06	3.0491E-05
Elovl6	7278.310132	0.595013921	0.123181688	4.830376418	1.36275E-06	3.12175E-05
Shb	205.5403828	1.178193726	0.244188269	4.824939913	1.40045E-06	3.20275E-05
Kcnk13	50.82976353	-1.721516232	0.357324213	-4.817798981	1.4515E-06	3.31395E-05
Flrt3	3516.467394	-0.968030556	0.20097123	-4.816761866	1.45907E-06	3.32565E-05
Rad51d	684.9753981	0.907289908	0.188445449	4.814602378	1.47493E-06	3.35621E-05
2310022B05Rik	1173.81724	-0.766503999	0.159302632	-4.811621676	1.49711E-06	0.03401
Pcdhga3	2282.091066	-0.74102603	0.154220946	-4.804963579	1.5478E-06	3.51031E-05
Arl15	4014.205203	-0.596272903	0.124300449	-4.797029355	1.61036E-06	3.64614E-05
Pcdh17	7243.946447	0.631792425	0.131737852	4.795830609	1.62002E-06	3.66195E-05
Fam19a5	1562.255184	0.655509248	0.136917726	4.787614211	1.68776E-06	3.80875E-05
Mcm6	430.0854835	1.233466993	0.25827125	4.775858686	1.78942E-06	4.03151E-05
Itgav	105.4257074	-1.473530962	0.308665881	-4.773870552	1.80719E-06	4.06483E-05
Arntl	1884.357133	-0.783613528	0.164195793	-4.772433643	1.82013E-06	4.08721E-05
Galk1	170.9633807	-1.276957133	0.267633715	-4.771286508	1.83053E-06	4.10381E-05
Zfp423	318.115344	-0.99641319	0.209444646	-4.757405871	1.96097E-06	4.38903E-05
Scrt1	612.2401185	-1.00603076	0.211563478	-4.755219422	1.98231E-06	4.42954E-05
Tmem74	1333.766121	-0.764434719	0.160797341	-4.754025876	1.99405E-06	4.4485E-05
L3mbtl4	157.0278928	-1.503613156	0.316568974	-4.749717374	2.03701E-06	4.53692E-05
Inpp5k	1084.33378	-0.697415398	0.14699083	-4.744618405	0.002089	4.64513E-05
Ptgfrn	3362.073581	-0.659766358	0.139175551	-4.740533482	2.13156E-06	4.73207E-05
Ctbp2	1622.177734	-0.657501224	0.138775164	-4.737888299	2.15957E-06	4.78646E-05
Mkl2	4119.958722	-0.638075452	0.134872086	-4.730967487	2.23452E-06	4.94456E-05
Dfna5	691.6341849	0.837979123	0.177276108	4.726971569	2.27893E-06	5.03467E-05
Maml3	316.1745414	-1.135411338	0.240713537	-4.716857029	2.39516E-06	5.28289E-05
Gabra3	1264.744267	0.76395104	0.162334032	4.706043641	2.5257E-06	5.56185E-05
1600029O15Rik	115.1674037	1.391134722	0.295944987	4.700653106	2.59331E-06	5.70152E-05
Skil	5293.998625	0.56576169	0.120409325	4.698653426	2.61882E-06	5.74836E-05
Cep120	4261.779717	0.533349683	0.11356908	4.696257869	2.64971E-06	5.80682E-05
Sobp	7526.938789	-0.696253004	0.14829996	-4.694896767	2.66741E-06	5.83625E-05
Ahcyl1	3443.478052	-0.558899659	0.11934035	-4.683241312	2.82374E-06	6.1684E-05
Fam184b	910.197015	-1.071583457	0.228906684	-4.681311348	2.85046E-06	6.21682E-05
Spr	777.2084932	0.792186281	0.169495135	4.673799511	2.95678E-06	6.43842E-05
Mast4	2810.320107	0.674058248	0.144275334	4.67202695	2.98242E-06	6.48391E-05
Foxq1	19.75700257	-1.622834929	0.347882835	-4.664889336	3.08783E-06	6.70241E-05
Dock11	650.9061379	0.974455446	0.209397272	4.653620547	3.26157E-06	7.06828E-05
Gabrg3	193.5105482	-1.201533336	0.258314768	-4.651431069	3.29639E-06	7.13244E-05
Zdbf2	1643.81167	0.788435784	0.169521843	4.65093919	3.30427E-06	7.13816E-05
Prepl	11054.55394	0.50086044	0.107833567	4.644754458	3.40481E-06	7.34374E-05
3110035E14Rik	7778.607258	0.686204816	0.147999802	4.636525239	3.54315E-06	7.63007E-05
Nova1	312.5672483	1.107360602	0.239130556	4.630778346	3.64294E-06	7.82752E-05
Npy1r	1809.653833	-0.686281003	0.148206048	-4.630587024	3.6463E-06	7.82752E-05
Dhrs7	151.8544928	1.359302284	0.29387115	4.625504354	3.73688E-06	8.00936E-05
Prickle1	1154.638437	-0.748536928	0.162075387	-4.618449107	3.86619E-06	8.27352E-05
Eya1	57.61915301	-1.61651798	0.350168278	-4.616403265	3.90448E-06	8.34239E-05
Cldn1	19.97959027	-1.599393796	0.347100032	-4.607875684	4.06804E-06	8.67827E-05
Gabrb3	21561.91888	-0.54697326	0.118715108	-4.607444415	4.07648E-06	8.68271E-05
Pmaip1	444.096645	-1.278628793	0.277711716	-4.604158618	4.14137E-06	8.80718E-05
Cdh22	244.6321685	-1.037153968	0.225501533	-4.599321134	4.2387E-06	9.00015E-05
Ntm	6060.886683	-0.534665752	0.116351629	-4.595257981	4.32214E-06	9.16308E-05
Cacna2d3	973.0315696	-0.986351122	0.214700827	-4.594072305	4.34679E-06	9.20104E-05
Cdo1	1647.020963	0.646499246	0.14077118	4.592553996	4.37854E-06	9.25391E-05
Prickle2	7592.654561	-0.522584113	0.114004917	-4.583873473	4.5644E-06	9.62288E-05
Prim2	1069.061672	0.788689339	0.172062232	4.583744682	4.56722E-06	9.62288E-05
Far2	867.5793693	-0.812071439	0.177276454	-4.580819518	4.63157E-06	9.74343E-05
Tnfrsf19	2366.702509	-0.642140192	0.140309576	-4.576595634	4.72604E-06	9.92686E-05
Ldlrad4	911.1641492	-0.755801954	0.165397453	-4.569610611	4.88631E-06	0.000102477
Necab3	190.0609093	-1.311639375	0.287474889	-4.562622426	5.05186E-06	0.000105787
Abhd5	1975.98419	0.903859356	0.198206806	4.560183241	5.1109E-06	0.000106859
Vwa5b1	140.8025162	1.342299846	0.295055389	4.549314801	5.38209E-06	0.000112357
Adamts15	528.3377123	-1.044078604	0.229521516	-4.548935645	5.39179E-06	0.000112388
Synm	3703.273558	-0.613949255	0.135075076	-4.545244546	5.48715E-06	0.000114201
Bok	324.2283026	-1.00378463	0.22120316	-4.537840364	5.68333E-06	0.000118104
Trappc9	3703.262062	0.556804998	0.122748957	4.536128153	5.72964E-06	0.000118886
Mb21d2	1372.961737	-0.920915969	0.203208303	-4.531881606	5.84606E-06	0.000121117
Unc13c	241.5528566	1.072241801	0.236644488	4.53102378	5.86985E-06	0.000121426
1500009C09Rik	2244.111445	0.576630433	0.127365781	4.527357579	5.97258E-06	0.000123364
Pgap1	4613.201247	-0.734435739	0.162318792	-4.52465009	6.04955E-06	0.000124765
Ntn1	91.02025372	-1.476998305	0.326756346	-4.520182463	6.17864E-06	0.000127235
Ifi27	51.77626248	1.597670561	0.353755128	4.516317736	6.29242E-06	0.000129383
Prkce	11352.15568	-0.583775273	0.12950017	-4.50791123	6.5469E-06	0.000134413
Mfge8	122.3925885	-1.525546659	0.339044747	-4.499543714	6.80995E-06	0.000139604
Arsb	1254.866017	0.78461851	0.174422751	4.498372512	6.84756E-06	0.000140165
Ajap1	1645.827139	-0.639824096	0.142329693	-4.495366234	6.94503E-06	0.000141947
Sik1	1015.797852	-0.761406194	0.169672498	-4.487505054	7.20621E-06	0.000147065
Clstn2	5845.524061	-0.654544856	0.145922679	-4.485559464	7.27229E-06	0.000148192
Mpp2	2585.465704	0.587750211	0.131209128	4.479491781	7.4821E-06	0.00015224
9930014A18Rik	114.773344	-1.39618221	0.312213427	-4.471883945	7.75335E-06	0.000157525
Mapk9	12332.82604	0.528679483	0.118236484	4.471373502	7.77188E-06	0.000157526
S100a10	2337.344542	-0.887122344	0.198406058	-4.471246247	7.77651E-06	0.000157526
Pcdhb3	334.8743196	-1.008789332	0.22604987	-4.462684857	8.0939E-06	0.000163713
Parp8	2763.210645	0.534735528	0.120038732	4.454691562	8.40139E-06	0.000169681
Fjx1	1340.706404	-1.49000295	0.334554385	-4.453694276	8.44053E-06	0.000169917
Atp2a2	19578.23339	-0.520526172	0.116876762	-4.453632736	8.44295E-06	0.000169917
Stk38l	457.0375006	0.862396054	0.193647063	4.45344246	8.45044E-06	0.000169917
Tmem29	1481.704204	0.65762939	0.147703534	4.45236055	8.49314E-06	0.000170525
2610001J05Rik	434.9385429	-0.898493455	0.201898828	-4.450216301	8.57838E-06	0.000171983
Ttll5	1788.891074	0.633808547	0.142461263	4.448988685	8.62756E-06	0.000172716
Tmtc2	77.22627248	-1.454994353	0.327187371	-4.446975894	8.70876E-06	0.000174086
Trp53i11	600.8961144	0.847023803	0.190591069	4.444194625	8.82217E-06	0.000176095
Rnf152	735.888009	-0.950563631	0.213985427	-4.442188626	8.90484E-06	0.00017723
Soga3	11832.89736	0.53029002	0.119375953	4.44218461	8.90501E-06	0.00017723
Anxa11	212.2180765	-1.142266761	0.257200007	-4.441161466	8.94746E-06	0.000177816
Ckap2l	187.0452765	-1.389597357	0.313198048	-4.436800816	9.13057E-06	0.000181191
Pcdhb12	412.748422	-1.141594571	0.258185053	-4.421613718	9.79665E-06	0.000194127
Cdh9	127.5942132	-1.471615143	0.333400327	-4.413958313	1.01498E-05	0.000200833
Glra2	645.5097525	-1.005465864	0.228085559	-4.40828375	1.04193E-05	0.000205868
Irf6	65.0684734	1.453322293	0.329788249	4.406834684	1.04892E-05	0.00020695
Vldlr	4882.937375	-0.844317125	0.191881213	-4.400207356	1.08147E-05	0.000213065
Dtx4	8049.294948	-0.574776163	0.130707105	-4.397436243	1.09537E-05	0.000215491
A830019L24Rik	19.72723085	-1.54421662	0.351209674	-4.396851045	1.09833E-05	0.000215762
Vamp1	205.1603125	1.034112043	0.235663442	4.38808852	1.14351E-05	0.000224316
Pdzrn4	224.111523	-1.24189166	0.283135066	-4.386216357	1.15339E-05	0.00022593
Lhfpl3	377.9449594	-1.167826371	0.266381385	-4.384038956	1.16499E-05	0.000227874
Tmie	154.8333613	-1.136189489	0.25924385	-4.382705667	1.17214E-05	0.000228945
Hdac11	4544.506449	0.537674832	0.122717881	4.381389466	1.17925E-05	0.000230004
Tmem132e	338.5960938	1.108826922	0.253349383	4.376671104	1.20506E-05	0.000234702
St8sia1	1044.448781	0.716125617	0.163638209	4.376273859	1.20725E-05	0.000234795
Kif26b	2303.994146	0.723100241	0.165574712	4.367214254	1.25841E-05	0.000244397
Cntfr	866.8548563	0.761502891	0.174383787	4.366821612	1.26068E-05	0.000244489
Lypd1	45.51650778	-1.558826737	0.357341285	-4.362291181	1.28707E-05	0.000249254
Hecw2	4464.199724	-0.619474086	0.142284761	-4.353762694	1.33821E-05	0.000258789
Tshz2	236.7698133	-1.525472625	0.350843875	-4.348009855	1.37378E-05	0.000265294
Slc30a3	104.1183642	-1.340283085	0.308485611	-4.344718315	1.39454E-05	0.000268923
Sec14l1	4427.64844	-0.619396534	0.142629433	-4.342697859	1.40744E-05	0.000271026
Olfm4	187.238156	1.302203812	0.300061348	4.339791922	1.42618E-05	0.000274248
Acsl5	430.1190213	-1.084246253	0.250124145	-4.334832416	1.45871E-05	0.00028011
Myrip	727.9196565	-0.901090277	0.207895848	-4.334335126	1.46201E-05	0.000280349
Unc5b	134.2317911	-1.290871392	0.298022314	-4.331458855	1.48125E-05	0.000283639
Net1	363.2445202	-0.840460972	0.194250848	-4.326678516	1.51375E-05	0.000289456
Pds5b	3016.431313	-0.699005413	0.161654321	-4.324075036	1.53173E-05	0.000292486
Ano10	1348.023931	0.622357472	0.143984306	4.32239798	1.54342E-05	0.000294307
Hsd17b4	1612.752392	-0.654250538	0.151386668	-4.321718329	1.54819E-05	0.000294803
Slc4a4	125.8866004	-1.299601205	0.300984838	-4.317829482	1.57571E-05	0.000299626
Plp2	188.5949454	-1.121457479	0.260139331	-4.310987798	1.62527E-05	0.000308339
D630023F18Rik	498.2170141	1.035622738	0.240234549	4.310881777	1.62605E-05	0.000308339
Npy2r	19.21251782	-1.475311308	0.342759434	-4.304217955	1.67577E-05	0.000317326
Ank1	988.2815411	0.643825559	0.150022935	4.291514231	1.77459E-05	0.000335574
Adora1	5815.473725	-0.602444201	0.140394651	-4.291076586	1.77809E-05	0.000335771
Tacc1	3151.938576	0.520868411	0.121574261	4.284364182	1.83263E-05	0.000345592
Hcrtr2	247.7186919	-1.46599684	0.342252588	-4.283376928	1.84078E-05	0.00034665
Gpr22	2411.724626	-0.567548374	0.132701035	-4.276894851	1.89518E-05	0.000356404
Cplx2	9130.263637	0.556312146	0.130090762	4.27633859	1.89992E-05	0.000356804
9330159F19Rik	7307.870183	0.535042997	0.125354612	4.268235451	1.97025E-05	0.000369504
Laptm4b	126.2592681	-1.233065479	0.289139378	-4.264605844	2.00255E-05	0.000375046
Kndc1	3097.93686	0.546868641	0.128353353	4.260649428	2.03834E-05	0.000381225
Arhgap21	11103.68378	0.507274289	0.119085656	4.259742987	2.04662E-05	0.000382066
Gprin3	255.9438902	-1.172017177	0.275150775	-4.25954525	2.04843E-05	0.000382066
Rora	561.6701631	-0.990389284	0.232572417	-4.258412489	2.05884E-05	0.000383483
Tapbp	597.8120545	0.837410578	0.196762063	4.255955467	2.08158E-05	0.000387191
Prkacb	18724.34527	-0.524152957	0.123166641	-4.255640599	2.08451E-05	0.000387209
Impact	5195.680792	0.613977053	0.144298064	4.254922308	2.09122E-05	0.000387926
Hipk1	4173.229725	0.496264108	0.116652623	4.254204461	2.09794E-05	0.000388645
Itgbl1	371.2413483	0.901723643	0.212091646	4.251575495	2.12272E-05	0.000392703
Glis3	377.4935867	-1.174867693	0.276489429	-4.249231877	2.14505E-05	0.000396297
Rgs5	43.87041722	1.513318621	0.356237707	4.248058511	2.15631E-05	0.000397839
Nup93	1171.367869	0.68131206	0.160517994	4.244459111	2.19121E-05	0.000403733
Gpc6	246.8070285	-1.106475043	0.260707511	-4.244124146	2.19449E-05	0.000403792
Ppp2r1b	819.0098162	0.777901762	0.183453272	4.24032646	2.23195E-05	0.000410132
Odc1	5601.618994	0.55758906	0.131560145	4.238282487	2.25236E-05	0.000413327
Mcur1	358.0662954	0.973585612	0.229846591	4.235806187	2.27733E-05	0.000417348
Sh3bgrl	3723.638572	0.537064252	0.126890607	4.232498078	2.3111E-05	0.000422782
Pcdha10	64.1343582	-1.444027439	0.341192437	-4.232296157	2.31318E-05	0.000422782
Plat	685.5532195	0.734195414	0.173613217	4.228914295	2.34822E-05	0.000428613
Dock3	14368.24538	-0.598137082	0.141481461	-4.227671096	2.36123E-05	0.000430411
Ackr1	1881.757442	-0.628517165	0.148830243	-4.223047372	2.41021E-05	0.000438755
Pde3a	40.68788086	-1.510199977	0.358546969	-4.212000404	2.53119E-05	0.000459933
B3gnt5	922.2422296	-0.714854245	0.169725994	-4.211813582	2.53329E-05	0.000459933
Ago2	6345.203973	0.50410669	0.119744863	4.209839786	2.55552E-05	0.000463353
Pou3f4	58.15602612	-1.397970646	0.332285537	-4.207136604	2.58627E-05	0.000468307
Tgfb2	121.2039092	-1.228468697	0.292234812	-4.203704164	2.62582E-05	0.000474839
Xpr1	9691.426247	-0.517740769	0.123275093	-4.199881389	2.67055E-05	0.000482288
Dlg1	1850.989091	-0.652932405	0.15548083	-4.199439934	2.67576E-05	0.000482591
Rgag1	755.676093	0.798426416	0.190266916	4.196349172	2.71252E-05	0.000488204
Slc9a9	1090.629995	0.916241362	0.218349073	4.196222814	2.71403E-05	0.000488204
Usp25	1022.147699	-0.715888697	0.170728475	-4.193141758	2.75117E-05	0.000494234
Tenm1	22168.45767	-0.640097245	0.152691839	-4.19208551	2.76402E-05	0.000495889
Gabra4	1817.833677	-0.700974031	0.167327233	-4.189240544	2.7989E-05	0.000501487
Dtna	5851.441354	0.547865212	0.130896377	4.185487965	2.84554E-05	0.000509177
Arl4a	2834.820425	-0.715173007	0.170949505	-4.183533659	2.87013E-05	0.000512903
Cdh18	597.3656214	-1.035421502	0.247572081	-4.182303178	2.88571E-05	0.000515014
Morn2	446.091156	0.787545191	0.188361929	4.181021066	2.90203E-05	0.000516648
Cux2	1928.60152	-0.564729792	0.135070851	-4.180989363	2.90243E-05	0.000516648
Nefm	522.9050117	0.918498606	0.219782188	4.17913124	2.92625E-05	0.000520209
Slc6a6	9666.827785	-0.50490706	0.120830799	-4.178628842	2.93272E-05	0.000520681
Tanc2	17692.83469	-0.469365997	0.112670637	-4.165823596	3.10231E-05	0.000550075
Col12a1	69.58672298	-1.362727303	0.327178883	-4.165083309	3.11239E-05	0.000551147
Ksr1	873.9768406	-0.656123523	0.157578966	-4.163776044	3.13027E-05	0.000553596
Meis2	7631.082613	0.539620949	0.129736087	4.159374327	3.19121E-05	0.000563642
Adam23	10234.37553	0.46441631	0.111696866	4.157827579	3.21288E-05	0.000566738
Dgkh	2306.428437	-0.596365552	0.143814536	-4.146768265	3.37201E-05	0.000594039
Pak1	10139.16842	-0.58020102	0.14003326	-4.143308668	3.42331E-05	0.000602299
Arl4c	4639.915211	0.477578297	0.115368999	4.139572159	3.47954E-05	0.000611405
Pcx	365.933894	-0.870022793	0.210248588	-4.138067237	3.50244E-05	0.000614637
Pcdhga9	604.0135192	-0.702299493	0.169786172	-4.136376275	3.52833E-05	0.000618387
Timp3	175.5976652	-1.072661811	0.259405765	-4.135073142	3.54842E-05	0.000621109
Rgs4	20145.72163	-0.555063769	0.134526101	-4.126067472	3.69019E-05	0.000645098
Prkd3	99.38088885	-1.309873255	0.317514438	-4.125397461	3.70095E-05	0.000646152
Gsn	39.76454128	-1.471665729	0.356766136	-4.12501519	3.7071E-05	0.000646399
Itgb3	137.3796113	-1.192741596	0.289204146	-4.124220251	3.71993E-05	0.000647808
Coro1a	2714.708934	-0.524387221	0.127215811	-4.122028662	3.7555E-05	0.000653171
Dzip1	3414.680521	0.569418005	0.13816212	4.1213757	3.76617E-05	0.000654192
Fgf10	128.0192951	-1.326625012	0.32191185	-4.121081627	3.77098E-05	0.000654195
Syt17	226.8798092	-1.058027055	0.2568084	-4.119908282	3.79023E-05	0.000656701
Mpp6	2414.007196	0.560010794	0.136033458	4.116713662	3.84313E-05	0.000665022
Trp53inp1	444.1656793	0.977823278	0.237624624	4.114991368	3.87194E-05	0.000669159
Chrm2	78.32948409	-1.469186014	0.357109693	-4.114102875	3.88688E-05	0.000670892
Igsf9b	1846.025972	0.8123979	0.197791501	4.107344843	4.00233E-05	0.000689948
Gnb4	3672.907672	-0.769231629	0.187428078	-4.104142974	4.05816E-05	0.000698473
Ptx3	16.61096618	-1.408386404	0.343180475	-4.103923467	4.06202E-05	0.000698473
Stat3	1231.205206	0.607800367	0.148124028	4.10332054	4.07262E-05	0.000699416
Tmem184c	4526.877514	0.501611212	0.122274849	4.10232535	4.09019E-05	0.000701549
Rxfp1	50.61438746	-1.46843125	0.35840034	-4.097181522	4.18211E-05	0.000716416
Tmem91	111.4294258	-1.204402166	0.294009266	-4.096476899	4.19485E-05	0.000717698
Frrs1l	5800.379618	0.552819049	0.135063783	4.093022098	4.25787E-05	0.000727454
Ccdc147	60.35935696	1.395460212	0.340957513	4.092768628	4.26253E-05	0.000727454
Pcyt1b	10519.8407	0.492492272	0.120381989	4.091079368	4.2937E-05	0.000731859
Nr1d1	4148.944098	-0.533505139	0.130465289	-4.089249658	4.32771E-05	0.000736736
Itpripl1	271.1580395	-1.082526369	0.26505374	-4.084176923	4.42333E-05	0.000752077
Lgi1	3147.574703	0.612603578	0.150109383	4.08104788	4.48331E-05	0.000761327
Nrip3	6241.03909	0.49789757	0.122161623	4.075728197	4.58706E-05	0.000777976
F2r	547.9458178	-0.832132509	0.204194371	-4.075198085	4.59752E-05	0.000778783
Ccdc104	2700.432346	0.558475192	0.137150233	4.071995951	4.6612E-05	0.000788592
Marcksl1	33672.83687	-0.454450546	0.111617799	-4.071488166	4.67137E-05	0.000789335
Traf3	1987.617969	0.658920028	0.16191001	4.069668264	4.70801E-05	0.000794543
Mdga1	3177.587995	-1.240816167	0.305055836	-4.067505096	4.75192E-05	0.000800962
Pvrl3	1809.832483	-0.853184663	0.20982821	-4.06611039	4.78043E-05	0.000804774
Scel	91.56529576	1.243331907	0.305879999	4.064770211	4.80798E-05	0.000808416
Dst	12884.48305	0.497572385	0.122445367	4.063627694	4.83159E-05	0.000811386
C1ql2	110.857144	-1.284157938	0.316219901	-4.060964964	4.88703E-05	0.000819688
Bcl6	206.9360771	-1.282583516	0.316124267	-4.057213094	4.96618E-05	0.000831941
Slc22a3	35.5043638	-1.449526751	0.357446561	-4.055226451	5.00858E-05	0.000837706
Tnrc6a	2277.109346	0.518294138	0.127815226	4.055026565	5.01286E-05	0.000837706
Cdk19	3490.299226	-0.531963919	0.131436005	-4.04732266	5.18068E-05	0.000864692
Tcp11	96.53352418	1.266561168	0.313609495	4.03865696	5.37581E-05	0.000896166
2510009E07Rik	4774.690748	-0.636399703	0.157633236	-4.037217778	5.40889E-05	0.000900579
Atp6v1g2	10361.75945	0.520946643	0.129075362	4.035988229	5.43729E-05	0.000904207
Tiparp	762.7134756	-0.834743589	0.206968694	-4.033187688	5.50253E-05	0.000913942
Mycn	1758.283872	-0.708123671	0.175621163	-4.032108993	5.52785E-05	0.000917033
Rian	4337.830737	0.548617683	0.136199835	4.028034857	5.6245E-05	0.000931607
Dclk3	953.6767463	0.806934167	0.200339585	4.027831889	5.62936E-05	0.000931607
Nacc2	585.013202	0.932380058	0.231540236	4.02685975	5.65267E-05	0.000934333
Cdk6	46.87879581	-1.443523891	0.358535311	-4.026169381	5.66929E-05	0.000935946
Adamts8	654.7091253	0.882035384	0.219118748	4.025376157	5.68843E-05	0.000937973
Tjp2	462.6812653	-0.922958735	0.229320771	-4.024749828	5.70359E-05	0.000939338
Maats1	94.82643289	1.197546318	0.297718254	4.022414824	5.76045E-05	0.000947559
B3gnt2	218.6963362	-0.966813101	0.24037928	-4.022031771	5.76983E-05	0.00094796
Dok5	4593.972596	-0.532404025	0.132440584	-4.019946225	5.82114E-05	0.000955241
Ccng2	2207.019989	0.638306666	0.15881401	4.019208807	5.83939E-05	0.000957085
Fam198b	63.60226182	-1.380772328	0.344367057	-4.009594702	6.08231E-05	0.000995704
Ly6g6e	33.91492102	1.430252444	0.357977098	3.99537415	6.45922E-05	0.00105614
Cat	5792.842933	0.49589538	0.124290833	3.989798505	6.61294E-05	0.001078851
Klhl25	850.4498208	0.67452309	0.169063427	3.989763495	6.61392E-05	0.001078851
Lrrc58	7998.215612	0.475542325	0.119208733	3.989156777	6.63086E-05	0.001080324
Il4ra	20.97079144	-1.400606692	0.351407185	-3.985708754	6.7279E-05	0.001094827
Fndc5	413.9529489	-1.082464286	0.271640476	-3.984915286	6.75042E-05	0.001097184
Atp7a	507.4528111	0.732611898	0.183985147	3.981907831	6.83643E-05	0.001109843
Fam13b	785.8444904	0.920160838	0.231354336	3.977279405	6.97082E-05	0.001130317
Tgfb3	203.2014689	0.990408405	0.249074105	3.976360393	6.9978E-05	0.001133346
Pcdh9	8040.88012	-0.494172202	0.124343327	-3.974255916	7.05996E-05	0.001142058
AF529169	531.5797242	-1.416781362	0.35665451	-3.972419593	7.11463E-05	0.001148726
Dkk3	598.2799764	-0.968652356	0.243851376	-3.972306291	7.11801E-05	0.001148726
Hunk	883.08628	-0.994779753	0.25098409	-3.963517178	7.38535E-05	0.001190463
Acsl3	8783.187833	0.432381561	0.109100382	3.963153516	7.39662E-05	0.001190873
Acan	324.443171	-1.400881267	0.35357819	-3.962012669	7.43206E-05	0.00119517
Csmd3	1926.419421	-0.564874816	0.142680959	-3.959006311	7.52622E-05	0.001208021
Chrna3	135.2442896	-1.341703404	0.338908392	-3.95889696	7.52967E-05	0.001208021
Slc15a4	440.3091044	0.735704049	0.185851204	3.958564889	7.54015E-05	0.001208282
Man2a1	151.5473708	-1.166253447	0.295859858	-3.941911743	8.08347E-05	0.001293829
Anxa3	62.17966418	1.379700167	0.350081894	3.941078335	8.11161E-05	0.001296813
Epb4.1l3	3661.916446	-0.512847716	0.130312325	-3.935527336	8.30142E-05	0.001325606
Sgk3	176.9342889	-1.023252135	0.260062351	-3.934641559	8.33209E-05	0.00132895
Itpk1	4085.080992	-0.533127194	0.135579811	-3.932201942	8.41713E-05	0.001340946
Isoc1	694.7067104	-0.90743944	0.230947511	-3.929202081	8.52282E-05	0.001356201
Hs3st5	319.6366926	-1.066380028	0.271814165	-3.923195202	8.73823E-05	0.00138886
Ptchd1	2371.093052	-0.617913378	0.157564869	-3.921644341	8.79467E-05	0.001396206
Tmem50b	2496.535736	0.593796337	0.151454498	3.920625316	8.83195E-05	0.001400176
Rcan1	2981.138097	0.64903131	0.165552297	3.920400524	8.84019E-05	0.001400176
Adcy8	2304.248782	-1.315121042	0.3355847	-3.918894526	8.8956E-05	0.001407319
Gjd2	429.4148748	-0.845719248	0.216228137	-3.911235882	9.1825E-05	0.001451027
Pnma3	588.9830404	-0.847794046	0.217035085	-3.906253428	9.37382E-05	0.001479546
Hist2h2bb	1809.383871	0.655868695	0.167923597	3.905756579	9.3931E-05	0.001480878
6430573F11Rik	83.026991	-1.308721233	0.33516383	-3.904720968	9.43342E-05	0.001485518
Fosl2	2593.040749	-1.270221533	0.325619191	-3.900941859	9.58192E-05	0.001505983
Spred2	1601.319228	0.707428514	0.181352261	3.900853023	9.58543E-05	0.001505983
Gfod1	3220.341528	-0.632048011	0.162047962	-3.900376178	9.60433E-05	0.001507218
Med13	8641.10682	-0.528633785	0.135617532	-3.897975252	9.70003E-05	0.001520488
Nanos1	1016.747093	0.632183289	0.162236514	3.896676987	9.75215E-05	0.001526906
Gucy2e	15.18962264	-1.323598579	0.339699551	-3.896380127	9.76411E-05	0.001527026
Cdc42se1	3046.951832	0.503031089	0.129213269	3.893029651	9.9E-05	0.001546508
Slc35f4	266.4044752	-0.977015778	0.251328894	-3.887399342	0.000101324	0.001581002
Exo5	287.6451829	-0.85621088	0.220307393	-3.886437355	0.000101726	0.001585465
Pak3	21508.97366	0.580309165	0.149364933	3.885176743	0.000102255	0.001591897
Atp1b1	16506.75623	-0.488051559	0.125655961	-3.884030296	0.000102739	0.001597605
Sertm1	259.0292877	-1.119892513	0.288542485	-3.881204929	0.00010394	0.001614443
Actn1	1333.140929	-0.568084835	0.146682499	-3.872887633	0.000107553	0.001668667
Lhfpl2	737.5445693	-0.832545897	0.215105429	-3.870408572	0.000108653	0.001683815
Rassf5	429.0336976	0.794766186	0.205437451	3.868652877	0.000109438	0.00169406
Creb5	94.69802208	1.283527052	0.331802023	3.868352103	0.000109573	0.00169423
Hspa4l	2873.162991	0.481045366	0.124472134	3.864683202	0.000111233	0.001717953
Cttnbp2	2405.968298	-0.614667336	0.159116352	-3.863005448	0.000112001	0.001727845
Usp29	4431.878815	0.557431013	0.144312577	3.862664115	0.000112157	0.001728309
Jkamp	1817.694107	0.560863904	0.145394908	3.857520952	0.000114543	0.001763082
Cbln2	65.46925125	-1.334269454	0.345933771	-3.857008379	0.000114783	0.001764792
Gmip	780.1146153	-0.637750601	0.165408862	-3.855601164	0.000115446	0.001772979
Ppp1r3c	62.72363264	-1.378581074	0.358531755	-3.845073851	0.000120516	0.001848772
Cnr1	6829.747559	0.452676126	0.117797951	3.84281835	0.000121629	0.001863757
Hey2	36.54682092	-1.363792314	0.355408965	-3.837247927	0.000124421	0.001904392
Scrn1	19360.056	0.480304148	0.12518492	3.836757224	0.00012467	0.001905886
Nrp2	4639.388324	0.572885588	0.149324862	3.836505053	0.000124798	0.001905886
Tmem163	465.9197288	-0.891873133	0.232663275	-3.833321495	0.000126425	0.001928575
Rab36	849.7438462	0.595365849	0.155354793	3.832297911	0.000126952	0.001934458
Meig1	133.7532939	1.039606467	0.27155755	3.828309939	0.000129026	0.001963874
Kif21a	8035.854203	0.451217676	0.118011282	3.823513041	0.000131564	0.002000265
Shf	876.0674971	-0.724226139	0.189741705	-3.816905401	0.000135136	0.002052293
Sqle	18844.75978	0.404372613	0.105970235	3.815907473	0.000135683	0.002058316
Pik3r5	22.16929397	-1.299225859	0.340780003	-3.812506151	0.000137565	0.002084542
Cacnb3	8864.344587	0.46520804	0.122091215	3.810331805	0.00013878	0.002100631
Gabrg2	5998.880546	0.474387355	0.12470638	3.804034359	0.000142358	0.002152403
Enpp5	8206.065452	0.451559039	0.118881022	3.798411496	0.000145626	0.002199378
Diap2	249.6128924	-0.893370008	0.235335261	-3.796158745	0.000146955	0.002216997
Fndc9	624.4058377	0.74440193	0.196158977	3.794890969	0.000147708	0.002225896
Tmem169	2357.686802	0.516710141	0.13618691	3.794124857	0.000148165	0.002230318
Eno2	4595.176315	-0.575705626	0.151925472	-3.789395006	0.000151015	0.002270708
Habp4	4711.17367	0.454802492	0.120054279	3.788307221	0.000151677	0.002278162
Enox2	782.1109721	-0.741552582	0.1960552	-3.782366296	0.000155345	0.00233068
Gch1	45.97790811	1.324154175	0.350343099	3.779592577	0.000157085	0.002353775
Zfr	21248.54379	0.418857715	0.110827529	3.779365293	0.000157229	0.002353775
Pcdhb9	1481.965005	-0.67675801	0.179394003	-3.772467301	0.000161641	0.002417181
Pkn2	926.3971066	-0.61214765	0.162495274	-3.767172033	0.000165107	0.002466312
Itpka	539.3687639	-0.972951683	0.258296914	-3.766795618	0.000165356	0.002467332
Fam196b	50.3702805	-1.349454617	0.358547351	-3.763671977	0.000167436	0.002495644
Slc16a1	486.7669591	-0.789573686	0.20980664	-3.763339829	0.000167659	0.002496238
Mmgt1	1381.242666	0.579050793	0.15414243	3.756595717	0.00017224	0.002561654
Ccdc3	58.87674293	1.327891966	0.35361351	3.755207104	0.000173198	0.002573096
Hrasls	46.81850723	-1.344849377	0.358164763	-3.754834414	0.000173456	0.002574126
Rnf128	236.6634982	0.938167358	0.250047593	3.751955161	0.000175461	0.00260105
Mesdc2	2089.363586	0.494865428	0.1320817	3.746661562	0.000179204	0.002653652
Gcnt2	235.7066869	-1.134845659	0.30295437	-3.745929329	0.000179727	0.002658521
Slc43a2	1186.115953	0.59825147	0.15974613	3.74501384	0.000180384	0.002664902
Ptma	15596.15299	-0.431292469	0.115171516	-3.744784176	0.000180549	0.002664902
Tspyl4	27237.19881	0.451854333	0.120688181	3.743981649	0.000181127	0.002670546
Gpx1	211.6971866	-1.171663732	0.313544187	-3.736837674	0.000186349	0.002744579
Dcaf7	14576.02676	0.516277478	0.138185642	3.736115204	0.000186885	0.002749506
Pdgfc	107.3755714	-1.242315943	0.332616716	-3.734977477	0.000187732	0.002758993
Neb	217.1644663	1.02915903	0.276178643	3.726425106	0.000194215	0.002851198
Cggbp1	3011.809459	0.4816024	0.129322129	3.72405251	0.00019605	0.002875051
Sh2d5	631.5957455	-0.634605039	0.170425041	-3.723660778	0.000196355	0.002876428
AI414108	937.5369415	0.826993239	0.222196498	3.721900422	0.000197729	0.002893456
Spire1	9962.427483	-0.544613392	0.146512383	-3.717183351	0.000201456	0.002944842
Osbpl2	3666.891186	0.455257676	0.122613106	3.712960952	0.000204849	0.002991226
Lmo7	4616.228112	0.589860929	0.158944287	3.711117527	0.000206346	0.003009878
Prom1	85.73505306	-1.322543432	0.356756381	-3.707133222	0.000209619	0.003054348
Pitpnm3	1001.006178	0.633894333	0.171072528	3.705412788	0.000211047	0.003071878
Akt3	11549.98795	-0.456373296	0.123191471	-3.704585152	0.000211737	0.003078642
Gpr139	39.04886464	-1.318782816	0.356829647	-3.695833084	0.000219167	0.003183235
Fmn1	388.4826559	-0.859443398	0.232560644	-3.695566807	0.000219397	0.003183235
Wipi1	209.8571627	0.98725412	0.267430407	3.691630029	0.000222821	0.003229492
1110032A03Rik	1719.55483	0.52300461	0.141749946	3.689628294	0.000224582	0.003251556
Lix1l	1402.585608	0.526396908	0.142694723	3.68897249	0.000225162	0.003256494
Rbmx	3381.046363	-0.481259072	0.130499709	-3.687817199	0.000226186	0.00326785
Cdkn1c	175.8212778	-1.109689943	0.300937472	-3.687443562	0.000226518	0.003269191
Dctd	247.9345972	-0.904497349	0.245539673	-3.683711627	0.000229862	0.003313949
Aifm3	36.71104658	1.30596588	0.354612538	3.682796687	0.000230689	0.003322362
Atrnl1	4381.757606	-0.553875104	0.150479199	-3.680741965	0.000232556	0.003345303
Plce1	169.6048888	-1.245848255	0.338505904	-3.680432862	0.000232838	0.003345303
Ubxn2b	1677.373038	0.649394873	0.176454629	3.680237112	0.000233017	0.003345303
Cox16	1276.558693	0.625073521	0.170004519	3.676805335	0.000236173	0.00338705
D430019H16Rik	19544.32894	0.464171264	0.126297121	3.675232337	0.000237633	0.003404412
Rapgef2	9376.353003	0.439889889	0.119966674	3.666767389	0.000245636	0.003511936
Dusp16	151.3054823	1.122823004	0.306217508	3.666749865	0.000245653	0.003511936
2310015A10Rik	90.15100733	1.09980133	0.299981214	3.666234007	0.000246149	0.003515343
AI987944	584.1441546	0.665539459	0.181549392	3.665886456	0.000246483	0.003516443
Slc5a3	926.2726691	-0.597951232	0.163324618	-3.66112127	0.000251114	0.003578766
Crtac1	1182.930556	-0.759377171	0.207692835	-3.656251165	0.000255931	0.003643609
Ret	282.3491779	0.823256759	0.225214334	3.655436774	0.000256744	0.003651388
Gpr133	42.71608035	1.307165235	0.357744999	3.653902187	0.000258285	0.00366947
Scml4	460.3216785	0.732120536	0.200466678	3.652080954	0.000260124	0.003688658
Tlk1	3599.664792	-0.437926385	0.119913144	-3.652029894	0.000260176	0.003688658
Rabgap1l	10537.18153	0.543755295	0.149076777	3.647484905	0.00026482	0.003750607
Cdc42ep2	623.6798595	0.720481956	0.19756543	3.646801758	0.000265525	0.003756692
Cadm3	46877.84161	-0.396189935	0.108700797	-3.644774873	0.000267626	0.003782502
Sub1	7918.076331	-0.491060988	0.134752981	-3.644156766	0.00026827	0.003787682
Dynll2	2243.330722	0.512348715	0.140719962	3.640909994	0.000271676	0.003828507
Col26a1	1069.462202	-0.721570979	0.198186618	-3.640866293	0.000271722	0.003828507
Lrrc49	4397.540414	-0.434804217	0.119437351	-3.640437549	0.000272175	0.003830935
Rfx3	5165.788871	-1.189902742	0.326882786	-3.640151132	0.000272478	0.003831249
Rcn1	2865.403523	-0.595885643	0.164047043	-3.632407104	0.00028079	0.003942485
Bend6	6481.068506	0.523291454	0.144068343	3.632244558	0.000280967	0.003942485
Sorcs1	289.8786691	-1.291332594	0.355848725	-3.628880767	0.000284653	0.003990106
Anxa5	519.4996294	0.671386973	0.185160439	3.625974197	0.000287874	0.004027408
Mstn	101.4269163	1.162374941	0.320571362	3.625947545	0.000287904	0.004027408
Arfgef1	5202.437663	-0.48801301	0.134624573	-3.624992064	0.00028897	0.00403819
Aadat	51.98166295	-1.298229259	0.358333538	-3.622963301	0.000291247	0.004065846
Fbxo2	216.1533578	0.869833357	0.240118519	3.622516746	0.000291751	0.004068713
Slc16a6	173.9222486	0.957671998	0.264461597	3.621213856	0.000293224	0.004085089
Kcng3	40.28986523	-1.297133941	0.358461112	-3.618618299	0.00029618	0.004122066
Figf	29.72025661	-1.288091205	0.356111945	-3.617096318	0.000297926	0.004142149
Cckbr	101.479848	-1.23898729	0.342726634	-3.615089011	0.000300244	0.00417013
Ethe1	383.0332274	-0.707128282	0.195741484	-3.612562173	0.000303186	0.004206711
Reln	886.6708425	-0.612465369	0.169561605	-3.612052203	0.000303783	0.004210715
Arrdc3	2273.045872	0.50336273	0.139400759	3.610903807	0.000305132	0.004225068
Aldh7a1	610.1607531	0.638081557	0.176722374	3.610643874	0.000305438	0.004225068
Atp2b2	15690.59649	-0.441232673	0.122366904	-3.605817083	0.000311172	0.004300035
Cd93	29.20766835	-1.268644631	0.351866065	-3.605475939	0.000311581	0.004301335
Htr4	17.34463434	-1.207583393	0.33556046	-3.598705861	0.000319805	0.004410397
Sep-08	1216.570385	0.525776255	0.146171115	3.596991476	0.000321919	0.004435076
Trdn	19.28518433	1.256261918	0.349446585	3.595004138	0.000324386	0.004464564
Cdk5r1	6965.906931	-0.415426852	0.115681546	-3.591124643	0.000329254	0.004526995
Capn1	225.4159393	-0.831425199	0.23157933	-3.590239249	0.000330375	0.004537831
Eef2k	3168.447314	-0.474803855	0.13227351	-3.58956118	0.000331235	0.004545078
Cacnb4	2882.987804	0.458796315	0.127982508	3.584836097	0.00033729	0.004623514
Spata13	906.4285505	0.761926852	0.212643286	3.583122082	0.000339512	0.004649303
Cadm2	7043.856837	0.42066791	0.117485635	3.58059016	0.000342819	0.004689888
Rtn3	30832.68829	0.400201769	0.111916591	3.575893136	0.000349034	0.004768346
Ino80c	864.4699446	0.681811026	0.190677463	3.575729485	0.000349253	0.004768346
Tsc22d1	16023.88144	-0.401227043	0.112316524	-3.572288659	0.000353875	0.004826629
Ypel1	4947.768677	0.494946435	0.138661739	3.569452084	0.000357729	0.00487432
Nt5dc3	4252.612243	-0.425009622	0.119125296	-3.567752905	0.000360056	0.004901138
Brms1	411.8354172	-0.690542579	0.193604763	-3.566764419	0.000361416	0.004914755
Ptprj	5376.152063	-0.46968591	0.131720768	-3.565769603	0.00036279	0.004928529
Rims2	2610.560345	-0.521925335	0.146382893	-3.565480396	0.00036319	0.004929063
Whrn	348.246162	-0.745121886	0.209231472	-3.561232349	0.000369118	0.005001214
Ndfip2	2552.00389	0.493518094	0.138584055	3.561146307	0.000369239	0.005001214
Nr2e1	39.95588143	1.271417388	0.357053901	3.560855617	0.000369648	0.005001792
A830018L16Rik	7493.732345	-0.540667315	0.151861364	-3.560269062	0.000370475	0.005008015
Syndig1l	401.9722037	0.733467128	0.206137711	3.558141416	0.000373488	0.005043753
Flrt1	995.3496815	0.552332322	0.155285422	3.556884575	0.000375279	0.005062928
Parp1	3155.760991	-0.465384797	0.13088635	-3.555640418	0.000377059	0.005081928
Coprs	875.4330925	0.545278011	0.153405642	3.554484722	0.000378721	0.005099281
Cdkl2	2691.718017	0.529798944	0.149082161	3.553738035	0.000379797	0.005108742
Clvs1	1250.696326	-0.519788298	0.146294161	-3.553035171	0.000380814	0.005117369
Nbas	1452.254448	0.517118553	0.14557493	3.55225005	0.000381952	0.005123386
Ralyl	4131.195545	-0.49541122	0.139465687	-3.552208643	0.000382012	0.005123386
Erich5	21.45494833	1.212404626	0.341525864	3.549964307	0.000385283	0.005162192
Mnd1	101.3813542	1.161395821	0.327262477	3.548820606	0.000386961	0.005179582
Nek9	1327.225421	0.513687442	0.144864734	3.545979948	0.000391156	0.00523061
Sstr4	97.98408498	-1.139459317	0.321398235	-3.545319146	0.000392138	0.00523861
Inhba	218.1662275	-0.884664	0.249643813	-3.543704886	0.000394547	0.005265635
AK129341	227.0251462	0.864246031	0.243933088	3.542963519	0.000395657	0.005275304
LOC100505025	50.21972943	-1.222427963	0.345329157	-3.539892128	0.000400291	0.005331871
Inhbb	241.0735887	-0.914296033	0.258434087	-3.537830648	0.000403429	0.005368433
Arhgef17	2364.20117	-0.471771412	0.133451496	-3.535152676	0.00040754	0.005417856
Parm1	1196.160954	-1.196996223	0.338764148	-3.533420612	0.000410219	0.005448175
Grin3a	376.4852661	-1.260321198	0.35702462	-3.530068033	0.000415453	0.00551232
Rassf8	91.36241465	1.155908218	0.327493131	3.529564771	0.000416244	0.005517453
Sult2b1	51.46157784	-1.242467218	0.352062746	-3.529107333	0.000416964	0.005521638
1700003E16Rik	1207.81418	0.595964226	0.168899896	3.528505581	0.000417913	0.005528845
Lap3	1028.67598	-0.525866249	0.149070537	-3.527633697	0.000419292	0.005541716
Gfra1	65.95197112	-1.197479022	0.339740274	-3.524689639	0.000423979	0.005594615
Lrrc20	506.4857769	0.647649063	0.183750794	3.524605519	0.000424114	0.005594615
Chml	1680.786846	-0.623592436	0.177014785	-3.522826836	0.00042697	0.005626858
Ghsr	58.19071174	1.242743037	0.35309108	3.519610394	0.000432181	0.005690038
Gm2115	15.31589805	-1.1774581	0.334805087	-3.516846502	0.000436706	0.005744076
Chn1	5092.076724	-0.557669114	0.158789163	-3.512009906	0.000444731	0.005844002
Stim1	1891.503735	0.4834176	0.137690255	3.510906424	0.000446582	0.005862671
Tcf24	21.04221058	-1.217722809	0.346896669	-3.510332955	0.000447546	0.005869687
C1galt1	421.2344181	-0.807028761	0.230152138	-3.50650126	0.000454039	0.005949135
Klhl1	48.32414193	-1.254601331	0.358009649	-3.504378537	0.000457674	0.005991014
Snx30	4810.969303	0.441663287	0.126044122	3.504037164	0.000458261	0.005992953
Ppm1k	530.8054104	-0.681963796	0.194725561	-3.502179135	0.000461469	0.006025472
Rpl29	4943.653873	-0.495483719	0.141482456	-3.502085945	0.000461631	0.006025472
Gsr	1014.555937	0.582836233	0.166665766	3.4970363	0.000470458	0.006134824
Micu2	1649.918697	0.459014065	0.131315799	3.495497637	0.000473179	0.006164416
Ank2	40544.63599	0.38943977	0.111493395	3.492940269	0.000477733	0.00621782
Fam134b	1837.132887	0.449905103	0.128977712	3.48823913	0.000486213	0.006322158
Mgat4c	50.61692316	-1.250377503	0.358547466	-3.487341626	0.000487848	0.006337379
Rbpms	50.94029235	-1.200148065	0.344481412	-3.483926924	0.000494114	0.006412684
Msc	49.76054991	-1.205341078	0.346338872	-3.480236195	0.000500972	0.006495508
Pkp2	60.26417713	-1.190459873	0.342418873	-3.476618745	0.000507779	0.006577525
Pcdhga10	402.9620436	-0.789002012	0.227576124	-3.466980627	0.00052634	0.006811486
Sfxn5	1116.20547	-0.592554587	0.170948231	-3.466280897	0.000527712	0.006822772
Epha6	1109.189585	-0.663717527	0.191494641	-3.465984858	0.000528293	0.006823827
Dctpp1	400.2124013	-0.778809978	0.224720457	-3.465683493	0.000528885	0.006825022
Dok4	2698.382196	-0.538395364	0.15554915	-3.461255586	0.000537662	0.00692879
Fgf13	1727.943605	-0.526926714	0.152241868	-3.461115655	0.000537942	0.00692879
Sirpa	8159.565219	-0.427367041	0.123559066	-3.458807643	0.000542572	0.006981846
Cadm1	19708.63585	-0.576072579	0.166701554	-3.45571211	0.000548841	0.007055865
Morc1	48.50470727	1.238084888	0.358312855	3.455318085	0.000549644	0.007059538
Ahr	321.2563096	-0.814555235	0.235831205	-3.453975631	0.000552387	0.007088105
Nsmf	14761.22418	-0.379958333	0.110081094	-3.451622072	0.000557228	0.007143501
Kcna3	440.0615188	0.786859778	0.228033312	3.450635222	0.000559269	0.007162944
Astn2	174.7410872	-1.020429947	0.295749832	-3.450314549	0.000559934	0.007164738
S1pr1	13.36433676	-1.139028247	0.330147318	-3.450060576	0.000560461	0.007164767
Gse1	1419.573236	0.669510176	0.194102252	3.449265363	0.000562114	0.007179179
B2m	1559.877364	-0.776634771	0.22524623	-3.447936825	0.000564886	0.007207842
Ppargc1a	662.6172172	0.578166322	0.167723239	3.447144977	0.000566544	0.007222252
Psrc1	24.09683235	-1.20908212	0.351241767	-3.442307358	0.000576775	0.007345804
Tgoln1	980.5353533	0.553918102	0.160991745	3.440661518	0.000580294	0.007383741
Vegfa	877.1118944	-0.855135223	0.248766278	-3.437504596	0.000587101	0.007448989
Hprt	2753.282706	0.448562909	0.130491832	3.43747882	0.000587157	0.007448989
Ptprh	107.7217109	1.025909144	0.298458217	3.4373627	0.000587408	0.007448989
Msrb2	117.0140202	-0.967339052	0.281426355	-3.437272437	0.000587604	0.007448989
Epb4.1l4a	786.0069523	-0.663151779	0.193004522	-3.435939079	0.000590504	0.007478801
Fundc1	445.0755034	0.648451578	0.188902265	3.43273585	0.000597524	0.007560699
Rab3d	2308.245669	0.474520889	0.138265139	3.43196336	0.000599229	0.007575247
Clk3	3367.446687	-0.614526685	0.179085694	-3.431467194	0.000600326	0.007582097
Tead1	292.5428403	0.822043908	0.239859614	3.427187654	0.000609867	0.00769549
Hip1	2724.397237	-0.555117755	0.161986707	-3.426934013	0.000610437	0.007695569
Ccdc171	109.712573	0.996539971	0.291050358	3.423943469	0.000617195	0.007773577
Kcnk10	1921.064416	0.47908256	0.139956472	3.42308257	0.000619153	0.007791052
Adam12	702.617885	-0.700499632	0.204969957	-3.417572232	0.000631823	0.00794317
Optn	1601.928151	0.489247361	0.143169102	3.417269179	0.000632527	0.007944703
Fam196a	1349.821204	-0.656747932	0.192214142	-3.416751364	0.000633731	0.007952512
Xrcc5	774.8993067	0.584742842	0.171361189	3.412341181	0.000644074	0.008074884
E330009J07Rik	548.7216449	0.649007137	0.190225603	3.411775955	0.000645411	0.008084221
Smpd4	1453.613968	-0.569702515	0.167260968	-3.406069698	0.000659054	0.008247532
Onecut2	74.70193449	-1.16318939	0.341654565	-3.404577339	0.000662665	0.008285137
Ndufaf2	408.2844608	0.663069729	0.194786272	3.404088614	0.000663852	0.008292382
Phip	2093.400864	-0.461503682	0.135736317	-3.400001498	0.000673855	0.008409634
Wdr16	29.39270035	-1.209093226	0.355675785	-3.399425197	0.000675276	0.00841968
Fbxo9	1764.914914	0.687332855	0.202260332	3.398258311	0.000678164	0.008442777
Dgkz	7274.865611	-0.433217804	0.127485363	-3.398176808	0.000678366	0.008442777
Pcdhb1	65.49243799	1.135953315	0.334801733	3.392913488	0.000691535	0.008598838
Cep350	6737.720911	0.380436909	0.112203046	3.390611249	0.000697369	0.008663499
Themis	30.79133555	1.215107264	0.358496146	3.389456981	0.000700312	0.008692145
Pls1	82.1259123	-1.161960013	0.343443968	-3.383259339	0.00071631	0.008874775
Kdsr	825.899369	0.540673339	0.159815159	3.383116727	0.000716682	0.008874775
Ptprf	13600.13731	-0.394218922	0.116529256	-3.383003853	0.000716976	0.008874775
Sdc1	285.8468056	-0.844628014	0.249898618	-3.379882696	0.000725168	0.008968039
Nkd2	1160.05202	-0.537562589	0.159351906	-3.373430564	0.000742378	0.009172563
Gpr85	18078.4516	0.487764434	0.144690394	3.371090639	0.000748712	0.009242466
Adamts17	902.8389214	-0.779227391	0.231188134	-3.370533676	0.000750227	0.009247972
Sel1l3	1328.489158	-0.612871315	0.181837786	-3.37042882	0.000750513	0.009247972
Ppap2b	536.2789638	1.185520475	0.351906815	3.368847731	0.000754831	0.009292795
Fam13c	585.94385	0.569542813	0.169382501	3.362465482	0.000772498	0.009501723
Srd5a1	1471.29035	-0.557537258	0.165986246	-3.358936495	0.00078243	0.009615232
Glcci1	2433.705285	-0.533665731	0.158937942	-3.357698752	0.000785942	0.009649702
Negr1	17459.91809	-0.479227434	0.142768291	-3.35667977	0.000788844	0.009676631
Trhr	109.8579396	-1.108030052	0.330526399	-3.352319379	0.000801375	0.009821521
Atp8a2	1883.133944	0.489079169	0.145997204	3.349921481	0.000808345	0.009898054
Tmem141	132.2924951	-0.975175747	0.291145093	-3.34944936	0.000809724	0.009906054
6330403A02Rik	4948.766877	-0.467373715	0.139551494	-3.349112952	0.000810707	0.00990921
Sh2d7	112.5051416	-1.12118548	0.334978209	-3.347040041	0.000816794	0.009974678
Il1rapl1	310.798203	-0.768352883	0.229662762	-3.34557016	0.000821136	0.010018738
Rps6ka3	1241.569475	-0.519654	0.155479127	-3.342275014	0.000830947	0.010129391
Gm3414	252.4442019	-0.753854075	0.225600552	-3.341543581	0.000833139	0.010147058
Lrch1	828.3433497	0.551107534	0.16494198	3.341220553	0.000834109	0.010149817
Lyrm9	2492.716439	0.512421715	0.153413935	3.340124975	0.000837407	0.01018087
Ostf1	148.3846507	-0.948644562	0.28413791	-3.338676498	0.000841785	0.010224996
Kcnj11	328.452425	0.715794861	0.214494292	3.337127782	0.00084649	0.010273005
Phldb2	33.23814716	-1.182210016	0.3542897	-3.336845567	0.00084735	0.010274309
Hrh1	353.391337	-0.723592232	0.216892898	-3.336173008	0.000849403	0.01029006
Tsc22d2	1828.785544	0.472079405	0.141606049	3.333751685	0.000856831	0.010370847
Extl1	335.9724367	0.888501692	0.266904585	3.328911312	0.000871862	0.010543425
Pparg	13.83463784	-1.086955065	0.326854093	-3.325505444	0.000882584	0.010663643
Rab31	2393.010009	-0.456427693	0.137312435	-3.324008431	0.000887335	0.010704088
Nell2	29441.17337	-0.36924067	0.111084676	-3.323956858	0.000887499	0.010704088
Hn1l	708.7222241	-0.77126638	0.232187487	-3.321739638	0.000894581	0.010773636
Ppfibp1	1238.305822	-0.515324203	0.155140669	-3.321657728	0.000894844	0.010773636
Traf6	754.2349677	-0.590025154	0.177758188	-3.319257244	0.000902572	0.010857111
Ugp2	1383.619648	-0.531433876	0.160187728	-3.317569227	0.000908044	0.010913315
Clcn3	9865.530613	0.398792243	0.120242967	3.316553584	0.000911351	0.010943427
C730002L08Rik	36.94395986	1.165870507	0.35179523	3.314060022	0.000919518	0.011031788
Rev3l	13538.96309	0.382126736	0.115328059	3.313389112	0.000921726	0.011048579
Zfhx2	113.6850215	-1.01772147	0.307223934	-3.312637322	0.000924207	0.011061014
Pbx4	278.2040681	0.826999502	0.249653908	3.31258384	0.000924384	0.011061014
Rassf2	843.403264	0.539075896	0.162805649	3.311162114	0.000929094	0.011107632
Ldb3	79.76489739	1.117523439	0.337827964	3.307966065	0.000939762	0.011225346
Mblac2	3579.857575	0.462596846	0.139886469	3.306944898	0.000943194	0.011256498
Adra1a	147.388257	-1.097619324	0.332128342	-3.304804751	0.000950426	0.011332344
Mme	65.83623472	-1.144914349	0.346463557	-3.30457367	0.00095121	0.011332344
Taf9b	2003.953745	0.438664998	0.132831408	3.302419247	0.000958547	0.011409799
Myh3	241.1505226	-1.053783666	0.319535611	-3.297859864	0.000974247	0.011585798
Fzd8	47.51799637	-1.170513095	0.354955381	-3.297634455	0.00097503	0.011585798
Prps2	539.5736394	-0.739641931	0.224472545	-3.29502181	0.00098414	0.011683886
Sall2	1680.879367	-0.608851572	0.184852428	-3.293716926	0.00098872	0.011728059
Peg10	639.8816493	0.84876028	0.257871456	3.29140841	0.000996871	0.011814476
Ska2	562.3307105	0.608384029	0.184963238	3.289215938	0.001004669	0.011896572
Med12l	1037.034891	0.509480398	0.155014397	3.286665034	0.001013813	0.01199445
AU022754	33.53386008	-1.172769208	0.356896104	-3.28602412	0.001016123	0.012011367
Tnfrsf21	2900.188315	0.453154233	0.13806997	3.282062223	0.001030509	0.012170877
Tnn	178.5837206	-1.020461774	0.311220845	-3.278899178	0.001042129	0.012292624
Bcor	2108.536666	0.420879152	0.128365078	3.278766779	0.001042618	0.012292624
2900079G21Rik	254.3065484	-0.760614774	0.232158533	-3.276273179	0.001051868	0.012390983
1700001L19Rik	1478.979057	0.508444437	0.155247792	3.275050995	0.001056429	0.012433987
Pcdhgc5	816.2814249	0.691141524	0.211131339	3.273514607	0.001062189	0.012491013
Synj2	363.328391	-0.751105561	0.22975974	-3.269091267	0.001078935	0.012677021
Apex2	201.1427682	-0.766018039	0.234484784	-3.266813414	0.001087653	0.012768471
Lgals8	756.0938164	0.604468334	0.185168669	3.264420147	0.001096884	0.012865768
Necab1	26445.62199	-0.550354418	0.168623629	-3.263803664	0.001099273	0.012882726
Ap3m2	6206.764804	0.363841483	0.111492061	3.263384686	0.0011009	0.012890724
Zbtb41	2207.774579	-0.447765398	0.137256919	-3.262242821	0.001105344	0.012911222
Ammecr1l	985.8161828	0.557768602	0.170977583	3.262232353	0.001105385	0.012911222
Uckl1	154.2701537	-0.914073161	0.280200923	-3.262206107	0.001105487	0.012911222
Pcsk1n	795.5891984	-0.621770559	0.190700877	-3.260449397	0.001112358	0.012980364
Atp11c	661.7011878	0.61436758	0.188499812	3.259247713	0.001117081	0.013024342
Adam11	1208.352966	-0.501895577	0.154025619	-3.25852012	0.001119949	0.013046645
Chrm1	2696.915721	-0.537032604	0.164836026	-3.257980777	0.00112208	0.013048729
Aldh3a2	1727.991608	0.524070376	0.160864206	3.257843298	0.001122624	0.013048729
Pdxp	5064.037618	0.423810073	0.130092903	3.257749368	0.001122995	0.013048729
Vstm2l	463.1832855	-0.663659736	0.203752432	-3.257186818	0.001125224	0.0130635
Mllt11	24173.00152	0.346313174	0.106384638	3.255293078	0.001132754	0.013139755
Rgs8	170.352472	-0.95267991	0.292690534	-3.25490509	0.001134303	0.013146549
Maged1	24788.14897	-0.390680473	0.12016566	-3.251182344	0.001149261	0.01330862
Vipr1	53.129402	-1.099141943	0.338331965	-3.248708543	0.001159302	0.013413517
3110043O21Rik	1564.291714	0.439366453	0.135254869	3.248433532	0.001160423	0.013415121
Olfml2b	230.0432934	-0.983969227	0.302980826	-3.247628704	0.00116371	0.013440001
Stx18	941.9481768	0.482726572	0.148649035	3.247424853	0.001164544	0.013440001
Kcnn2	134.8423438	-0.888241541	0.273556517	-3.24701291	0.001166231	0.013448101
Ptpro	8312.607706	0.448567794	0.138168967	3.24651623	0.001168268	0.01346022
Ikzf4	371.1439612	-0.63743611	0.196628343	-3.241832279	0.001187639	0.013671867
Amotl1	1095.398039	-0.526339479	0.16238935	-3.241219192	0.001190196	0.013689764
Wdr37	2675.342893	0.486208445	0.150108763	3.239041041	0.001199323	0.01378313
Nrip1	6092.722124	-0.53759663	0.166013732	-3.238266042	0.001202586	0.013809006
Mvk	3509.140969	0.473699759	0.146324701	3.237319177	0.001206584	0.013843268
Ypel2	352.3408552	-0.774092429	0.239307372	-3.234720357	0.001217619	0.013958149
Lcorl	3730.611064	-0.432982654	0.133886629	-3.233949937	0.001220909	0.013984114
Lypd6	379.6459427	-0.75333802	0.233087132	-3.232001757	0.001229263	0.014068003
Meg3	1690.461586	0.600550681	0.185950043	3.229634542	0.001239485	0.014173111
2610044O15Rik8	332.8550296	-0.825009529	0.255592413	-3.227832617	0.001247319	0.014250754
Cdyl2	1062.862899	0.527691522	0.163553721	3.226410983	0.001253532	0.01429983
Wt1	29.92475826	-1.156166425	0.358348933	-3.226370496	0.00125371	0.01429983
Xylt1	145.7802514	-0.915692145	0.283855966	-3.225904177	0.001255754	0.014311192
9130024F11Rik	846.9548079	-0.533811281	0.165582103	-3.22384649	0.001264812	0.014402399
Bscl2	3025.44545	0.50199308	0.155845216	3.221100351	0.001276994	0.014529002
Pcdhgb4	338.4716012	-0.720175089	0.223742749	-3.218763922	0.001287444	0.014635701
Lgi2	1271.206427	-0.611123844	0.190185059	-3.213311532	0.001312139	0.014892469
Tnrc6c	7766.027108	-0.395938949	0.123218972	-3.21329535	0.001312213	0.014892469
Pik3r2	9966.591666	-0.360199347	0.112124542	-3.212493353	0.001315882	0.014921708
Jak1	9607.653031	0.380127961	0.118361751	3.211577713	0.001320083	0.014956919
Zcchc16	44.81220569	-1.130608942	0.352111787	-3.210937505	0.001323027	0.014977851
Tmem196	53.23403486	-1.141503409	0.35554632	-3.210561731	0.001324758	0.014985023
Tmem66	5141.360465	0.436506853	0.135981471	3.210046554	0.001327135	0.014999479
Clpp	1521.859268	0.461546346	0.143936489	3.206597215	0.001343149	0.01516792
Gopc	3521.803275	0.387335775	0.120855316	3.20495439	0.001350839	0.015242151
Cep83os	196.7489623	0.84110277	0.262740365	3.201269706	0.001368234	0.01542568
Rbm41	332.3657991	-0.763577101	0.238585657	-3.200431709	0.001372219	0.0154463
Zfp768	371.8199994	-0.77961686	0.243601116	-3.200382959	0.001372451	0.0154463
Fam69a	812.9235992	0.547799956	0.171178297	3.200171779	0.001373457	0.0154463
Dpcd	1383.712254	0.525205861	0.164274337	3.197126645	0.00138804	0.015591276
Pkia	25718.67902	0.430211917	0.134567229	3.197003603	0.001388632	0.015591276
Cryl1	457.1341644	0.647471921	0.202699461	3.194245899	0.001401966	0.015728059
Hadh	53.72313185	1.100130411	0.344789505	3.190730559	0.001419136	0.015907601
Ets2	1719.288706	-0.421050867	0.132057297	-3.188395328	0.001430648	0.016023492
Cxcl14	87.4587807	-1.090251264	0.342507762	-3.183143233	0.001456855	0.016303643
BC030500	119.5255648	-0.900272755	0.282929742	-3.181965768	0.001462791	0.016356664
Plekhh1	90.60316256	-0.966608445	0.303858585	-3.181112835	0.001467105	0.016391474
Nr2c2	3953.581119	0.418551946	0.131588445	3.180765195	0.001468866	0.016397736
Rgs20	108.176927	-1.007505747	0.316983886	-3.178413139	0.001480836	0.016517852
Kif21b	27582.90254	-0.381053642	0.119967799	-3.176299358	0.001491669	0.016625112
Gm6548	25.27237727	1.082447842	0.34100183	3.17431681	0.001501897	0.016708862
Frmd6	110.7359351	-1.00835286	0.317676757	-3.174147424	0.001502773	0.016708862
Osbpl9	2038.448593	0.452629005	0.142599318	3.174131623	0.001502855	0.016708862
Rasa3	1947.417038	-0.635982859	0.200629235	-3.169941101	0.001524698	0.016937923
Txnip	548.1720045	0.698659871	0.220463278	3.169053263	0.001529364	0.016975937
Zbbx	108.7434865	0.990319305	0.312576548	3.168245701	0.001533619	0.017005257
Nucb2	2072.761124	0.440411055	0.139015158	3.168079373	0.001534496	0.017005257
Cib2	132.404486	-0.957460828	0.30228091	-3.167453837	0.001537801	0.017028062
Ctxn2	118.4046697	0.920466187	0.290986462	3.163261203	0.001560123	0.017261229
Greb1l	536.5347145	-0.654958132	0.207094447	-3.162605958	0.001563638	0.017286115
A630007B06Rik	3312.680529	0.399934672	0.126596545	3.159127868	0.00158242	0.017479601
Slc4a8	4968.824195	0.373468618	0.118341639	3.15585132	0.001600304	0.017662855
Def6	231.5917339	0.705238768	0.223498428	3.155452918	0.001602491	0.017672709
Angpt1	916.9458595	-0.788766131	0.250085565	-3.153985038	0.001610573	0.017744171
AI593442	1849.165213	-0.540761829	0.171463337	-3.153804418	0.001611571	0.017744171
Shisa2	94.46387903	-0.963666816	0.305835881	-3.150927921	0.001627526	0.017897006
Peli2	1096.027091	-0.581555823	0.184572272	-3.150829847	0.001628073	0.017897006
Scamp1	5612.079539	0.351497601	0.111666315	3.147749623	0.001645326	0.018072108
A330102I10Rik	85.13922915	-1.001868825	0.318344157	-3.147124903	0.001648845	0.018096208
St6gal2	1852.938992	-0.421992568	0.134246842	-3.143407781	0.00166993	0.018308289
Rab30	793.8784457	0.518801521	0.165052766	3.143246453	0.001670851	0.018308289
Slc9a6	1362.09771	0.509611374	0.162147408	3.142889436	0.00167289	0.018315934
Dusp6	1469.704556	-0.674873746	0.214754229	-3.142539964	0.001674888	0.018323119
Stau2	8819.294838	0.390123973	0.124219015	3.140613972	0.001685941	0.018422078
Hs6st2	1148.992277	-0.729623943	0.232327777	-3.140493804	0.001686633	0.018422078
Ryr1	53.94739875	1.102501327	0.351382594	3.137609391	0.001703317	0.018567811
Hrk	2640.767816	-0.491924176	0.156787854	-3.137514573	0.001703868	0.018567811
Foxo6	1518.766694	-0.47741789	0.152171465	-3.137368039	0.00170472	0.018567811
Map2	42865.29628	0.359483493	0.114585598	3.137248471	0.001705415	0.018567811
Foxp2	30.34641961	-1.123876628	0.358457374	-3.135314569	0.001716699	0.018675772
Slc29a4	3696.018283	-0.486126966	0.155135832	-3.133556954	0.001727014	0.018773027
Arap2	2953.816232	-0.551628012	0.17608637	-3.132712729	0.001731989	0.018812125
Stat5b	157.2171481	-0.825818808	0.263706997	-3.13157716	0.001738701	0.018870019
Nr0b1	16.54955251	-1.065606539	0.340309335	-3.131288007	0.001740414	0.018873607
Tmc7	157.8449956	-0.906506062	0.289571079	-3.130513117	0.001745012	0.018908452
Icam5	1409.269764	-0.599978422	0.19172212	-3.12941679	0.001751537	0.018964101
Slc18b1	167.1891411	0.84909039	0.271348148	3.129154904	0.001753099	0.018965971
Cryz	202.9022504	-0.810923893	0.259394762	-3.126215369	0.001770718	0.019141422
C1qtnf4	579.2244149	-0.65453515	0.209424585	-3.125397858	0.001775647	0.019179519
Tshz1	963.3671312	0.489164561	0.156530521	3.125042703	0.001777792	0.019187511
Iqcf5	38.15899979	1.115469385	0.357232445	3.122531001	0.001793032	0.019336705
Runx1t1	3877.104344	0.517725402	0.165907312	3.120570123	0.001805013	0.019450548
Pcp4	2656.979357	0.576127606	0.184661704	3.119908429	0.001809073	0.019462879
Scn1a	1663.669506	-0.495874368	0.158941902	-3.119846708	0.001809452	0.019462879
Kcnh3	1939.286012	-0.617005991	0.197778182	-3.119686832	0.001810434	0.019462879
Pamr1	110.7933708	-1.010015842	0.323873722	-3.118548292	0.001817444	0.019519587
D10Bwg1379e	10001.61459	0.378120085	0.121255841	3.118365953	0.001818568	0.019519587
Hnrnpdl	6728.055657	-0.500362133	0.160555548	-3.116442499	0.001830474	0.019631939
Pld5	18.11305543	-1.022667677	0.328196486	-3.116022628	0.001833082	0.019644481
Slc4a7	1343.519966	-0.453719184	0.145635063	-3.115452935	0.001836627	0.019667029
Cnnm1	1017.022465	-0.591851414	0.190128621	-3.11290016	0.001852587	0.019822388
Kcns3	65.32444971	-1.099528659	0.353491186	-3.110483945	0.00186781	0.019969629
Npy	90.28726048	-1.060537214	0.341081392	-3.109337653	0.001875073	0.020026266
Lrrn1	2020.980835	-0.997946292	0.320967153	-3.109185103	0.001876041	0.020026266
Cpne7	1358.590664	-1.019768449	0.328076893	-3.108321468	0.001881533	0.02006891
Fgfr1	755.9003029	-0.675980035	0.217491428	-3.10807667	0.001883092	0.02006891
Htr7	62.57458829	-1.114088315	0.358473932	-3.10786424	0.001884446	0.02006891
Kctd13	7054.412104	-0.39533775	0.127250417	-3.106769783	0.001891436	0.020127654
St8sia5	110.7216619	-1.011142814	0.325594438	-3.105528521	0.001899393	0.020196583
Ube2ql1	18422.22812	0.417781713	0.134579672	3.104344867	0.001907009	0.020261786
Neurl1a	1507.966246	0.46080707	0.148489241	3.103302756	0.001913738	0.020317464
Ccnjl	161.405727	-0.891465239	0.287313264	-3.102763949	0.001917225	0.020338673
Plcxd2	10870.86861	-0.985809236	0.317850712	-3.101485063	0.001925526	0.020410873
Tnfrsf11a	185.8559755	-0.865729362	0.279229812	-3.100418815	0.001932472	0.02046861
Magi1	4014.625699	0.395798376	0.127693372	3.099600009	0.001937821	0.020509361
Ndrg1	4855.941102	-0.437377986	0.141175542	-3.098114442	0.001947562	0.020596487
Fam185a	649.3084649	-0.582327045	0.1879963	-3.097545247	0.001951306	0.02062011
Jakmip3	1389.764061	0.461378017	0.149017763	3.096127657	0.001960659	0.020702925
Tuba8	40.32502828	-1.098930716	0.355771937	-3.088862842	0.002009242	0.021199519
Sorcs3	251.5824223	-0.836125877	0.270812409	-3.08747255	0.002018664	0.021282488
Cpd	9626.670449	-0.380388295	0.123222943	-3.086992447	0.002021927	0.02129196
Jazf1	6638.698715	0.409503157	0.132659173	3.086881575	0.002022682	0.02129196
Atp6ap2	7829.378991	0.422685321	0.137051271	3.084140094	0.002041414	0.021472597
Kcnj16	444.2265904	0.650961201	0.211395073	3.079358441	0.002074469	0.021803487
Ccdc88c	674.0047348	-0.678063803	0.220217623	-3.079062402	0.002076532	0.021808376
Ntn4	30.18363403	-1.102219109	0.358056726	-3.078336561	0.002081597	0.021844766
Igf2bp3	214.0607572	-0.725463844	0.236096716	-3.072740089	0.002121031	0.022241506
Stk35	619.2402421	-0.547407269	0.178299226	-3.070160659	0.002139437	0.022417288
Dok6	682.8277828	-0.708931405	0.230948304	-3.069654087	0.002143068	0.022438122
Zmynd10	106.4071623	1.003702003	0.327068965	3.06877787	0.002149363	0.022477264
Gde1	3776.960483	0.380736976	0.124072084	3.068675588	0.002150099	0.022477264
Elfn1	102.9761542	-0.946264006	0.308408335	-3.068218001	0.002153395	0.022494489
Glul	6688.80358	-0.429585947	0.140034188	-3.067721908	0.002156972	0.022514637
2700099C18Rik	80.64179513	-0.98971398	0.322825551	-3.065785769	0.002170988	0.022643621
Magee2	462.2532251	-0.625216365	0.204157821	-3.062416925	0.002195574	0.022882575
Emx2	148.1761479	0.886424161	0.289499055	3.061924197	0.002199191	0.022902792
Vwa8	1050.533454	0.489978507	0.160063992	3.061141354	0.00220495	0.022945258
Rnmtl1	365.9601067	-0.61439362	0.20087404	-3.058601401	0.002223728	0.023123046
Tusc3	6793.751344	0.426643766	0.139523943	3.057853419	0.002229286	0.023145928
Rps6ka2	2831.594886	-0.526747159	0.172260686	-3.057848948	0.002229319	0.023145928
Ttc9c	1074.33644	0.45384804	0.148433788	3.057579049	0.002231328	0.023149178
Mest	707.863493	-0.574510093	0.188006007	-3.055807114	0.002244556	0.023268734
Dnajc6	22617.4703	0.371673137	0.121732639	3.053192134	0.002264209	0.023454665
Zfp706	6941.500775	0.540555285	0.177072216	3.052739147	0.00226763	0.023456839
Nlk	2923.846562	-0.404003013	0.132342446	-3.052709286	0.002267855	0.023456839
Ubqln2	6066.517572	0.355712851	0.116678883	3.048648062	0.002298736	0.023758246
Ntng2	1103.795936	-0.525282826	0.172347911	-3.047805015	0.002305194	0.023806975
A730056A06Rik	84.93490393	-0.964186432	0.316403431	-3.047332417	0.002308822	0.023812566
Aldh9a1	946.5922822	0.538814934	0.176818315	3.047280107	0.002309224	0.023812566
Fam214a	1185.689662	0.609770724	0.200137225	3.046763167	0.002313199	0.023835551
Cadps	8517.56002	0.351946359	0.115550613	3.045819906	0.002320468	0.023892418
Large	6187.829214	-0.437018755	0.143701145	-3.041164041	0.002356654	0.024201557
Gprasp1	21522.15402	0.377074746	0.123992272	3.041114912	0.002357039	0.024201557
Bre	1754.295235	0.439184072	0.144418396	3.041053523	0.002357519	0.024201557
Ermp1	1297.701867	0.471703966	0.155112435	3.041045466	0.002357582	0.024201557
Grm4	454.7600969	-0.559811472	0.184223112	-3.038768947	0.00237547	0.024366857
Rbm43	542.0093836	0.565859529	0.186258046	3.038040729	0.002381218	0.024407481
Agbl4	98.90295023	0.970669731	0.31972926	3.035911476	0.002398098	0.02456206
Lphn1	34184.11278	0.399442548	0.131587699	3.03556145	0.002400883	0.024572155
Acvr2a	4510.704624	-0.455258726	0.150036507	-3.034319677	0.002410788	0.024635216
Chd5	9842.975852	0.372452719	0.122752295	3.034181312	0.002411894	0.024635216
Ptn	5721.51436	-0.462179688	0.152335438	-3.0339604	0.002413661	0.024635216
Dtd1	2361.222053	0.443270109	0.146106417	3.033885296	0.002414262	0.024635216
Mt1	354.9423976	-0.744965806	0.245643924	-3.03270601	0.002423716	0.024713215
Lrch2	1523.254438	0.440991848	0.14556273	3.029565656	0.002449057	0.024952963
Thrb	915.4860769	-0.596294801	0.196870565	-3.028867229	0.002454725	0.02499207
Shd	613.7674153	-0.59333343	0.195927682	-3.028328741	0.002459104	0.025001547
Cys1	79.43712719	0.955484392	0.315518159	3.028302384	0.002459319	0.025001547
Fbxo10	2345.795269	0.43931177	0.145128892	3.027045581	0.002469567	0.025087054
AU023762	159.1337854	0.925027538	0.305713011	3.025803633	0.002479733	0.025171594
Zfp808	33.36376401	-1.083138966	0.358423155	-3.021955897	0.002511471	0.025474828
Mical2	1658.152553	0.561684506	0.185944491	3.020710662	0.002521822	0.02556083
Nme6	136.1416888	-0.871739395	0.289576123	-3.010398042	0.002609055	0.02641115
A730017C20Rik	475.4934555	0.736929959	0.244799855	3.010336579	0.002609583	0.02641115
Cntnap2	1427.383407	-0.439937765	0.146154097	-3.010095325	0.002611657	0.026412559
Poglut1	1024.004565	0.553984424	0.184156119	3.008232505	0.00262772	0.026555339
Grik3	542.2239254	-0.702566223	0.233660073	-3.006787661	0.002640241	0.02666214
Fam109a	451.4820163	-0.567388141	0.189076563	-3.000838027	0.002692377	0.027168535
Rnf169	1258.552242	-0.546449868	0.182129819	-3.000331689	0.002696858	0.027180573
Bend4	614.1298509	0.504843866	0.168267484	3.000246121	0.002697615	0.027180573
Elmod2	607.3653427	0.599672077	0.199888788	3.000028581	0.002699543	0.027180573
Efhd1	31.43356518	-1.072169231	0.357561653	-2.99855765	0.002712608	0.027291998
Fermt2	1060.058606	0.43441287	0.144910225	2.997806877	0.002719299	0.02733917
Tmem117	285.8169827	0.694479931	0.231871996	2.995100497	0.002743544	0.027562627
Dgkb	792.1403417	-0.635123874	0.212116745	-2.994218471	0.002751488	0.02760411
Lrrc16b	1865.499839	-0.470882648	0.157265289	-2.994193123	0.002751717	0.02760411
Pttg1	36.50879921	-1.021433539	0.341409762	-2.991811169	0.002773277	0.027799968
Glrx	1072.703851	0.477030872	0.159463275	2.991477954	0.002776306	0.027809907
Arxes1	449.5459158	0.555672392	0.185930519	2.988602379	0.002802566	0.02805237
Chrna7	283.5846003	-0.7146569	0.239169958	-2.988071349	0.00280744	0.028080571
Slco5a1	936.6167054	0.455228052	0.152359989	2.987845133	0.002809519	0.028080791
Arhgap12	2484.268352	0.426946273	0.142969679	2.986271462	0.002824018	0.028205064
Pbx1	8665.452052	0.396757566	0.132881106	2.985808728	0.002828295	0.028227127
Plxnc1	4505.829416	0.480242342	0.160865871	2.985358797	0.002832459	0.028248034
Otof	209.3798706	-0.792171925	0.265384262	-2.98499963	0.002835787	0.028260581
Sdc2	837.4409652	0.510230347	0.17104142	2.983080637	0.002853628	0.028417194
Aldh4a1	723.1876209	0.549957505	0.18437241	2.982862273	0.002855665	0.028417194
Matn4	10.62341987	-0.926546074	0.310709667	-2.982031689	0.002863424	0.028473651
Dcun1d4	2996.803817	0.430100303	0.144312679	2.980336209	0.002879322	0.028610902
Slc25a1	4633.101276	-0.428607637	0.143872102	-2.979087893	0.002891078	0.028689244
Flot2	4945.468543	0.341125222	0.114507943	2.979052905	0.002891409	0.028689244
Htr2c	168.0419517	-1.024467499	0.34392238	-2.978775323	0.002894029	0.028694392
Gclc	1727.569562	0.417161767	0.140061959	2.978408776	0.002897493	0.028707886
Nap1l2	1579.873891	0.44283667	0.148697133	2.978111682	0.002900303	0.028714891
Zbtb18	31970.66281	0.422465745	0.14191985	2.976791093	0.002912824	0.028817962
6030458C11Rik	1484.079432	0.419935221	0.141089547	2.97637372	0.002916792	0.02883632
Nek7	236.3389387	0.761652038	0.255935506	2.975953009	0.002920796	0.028855014
Met	12140.49062	-0.905632376	0.304382179	-2.975313399	0.002926894	0.028894344
Col8a1	30.43526653	1.052445145	0.353784687	2.974818258	0.002931622	0.02892011
Hs3st1	945.9918151	-0.726452258	0.244278239	-2.973872169	0.002940676	0.028988479
Tbr1	3714.737747	0.361318564	0.121572105	2.972051562	0.00295817	0.029139895
Klhl32	264.2512211	-0.652327086	0.21965162	-2.969825973	0.002979685	0.029317078
Polr2a	2516.770512	0.390995835	0.131659647	2.969746947	0.002980452	0.029317078
Acot7	11687.19321	0.329572019	0.110997072	2.969195617	0.002985805	0.029337509
Scn3b	8074.513237	-0.447606094	0.150755288	-2.969090499	0.002986826	0.029337509
Slc27a2	19.29113957	-0.995161459	0.335204074	-2.968822689	0.00298943	0.029341979
Cab39l	889.9888443	0.495853174	0.167096534	2.967465336	0.003002661	0.029450672
Paqr7	470.0680823	-0.630693028	0.212723344	-2.964851034	0.003028295	0.029680772
Osbpl8	7708.273154	0.391941271	0.13221905	2.964332834	0.0030334	0.029702863
Zmat3	2658.470036	0.376451619	0.127000227	2.964180685	0.0030349	0.029702863
Ttc7b	2579.441478	-0.449868698	0.151794164	-2.96367584	0.003039883	0.02973032
2810459M11Rik	206.7199545	0.734631863	0.248086484	2.961192606	0.003064502	0.02994022
Lurap1	220.7600195	-0.768867345	0.259658694	-2.961069136	0.003065731	0.02994022
Grk5	299.7358606	-0.745988935	0.252040675	-2.959795811	0.00307843	0.030042749
Rbm24	578.3233807	-0.553101212	0.186905495	-2.959256015	0.003083828	0.030072818
Zfp229	272.3699672	0.637735137	0.215533726	2.958864724	0.003087746	0.030072818
Pnrc1	2043.264265	0.428552857	0.144838743	2.958827499	0.003088119	0.030072818
Radil	475.9857125	0.548767061	0.185497163	2.958358245	0.003092825	0.030097173
Dbi	879.4484285	0.495216339	0.167453306	2.957339879	0.003103059	0.030175257
Arrdc4	2747.290067	-0.432165853	0.146392035	-2.952113158	0.003156072	0.030668938
Prr7	154.5659568	-0.890106911	0.301911244	-2.948240351	0.003195885	0.031018933
Cnga4	26.53802893	-1.056765911	0.358448343	-2.948167931	0.003196634	0.031018933
Fam13a	161.9422016	-0.846072793	0.287100631	-2.946955536	0.003209193	0.031118692
Wnk1	3847.081319	0.392962933	0.133405696	2.945623354	0.003223046	0.031230836
N28178	4756.000237	-0.365576601	0.124129782	-2.945115952	0.003228337	0.031259914
Baz2b	1926.124637	0.402316996	0.136626892	2.94463988	0.003233308	0.03128586
Hrh3	419.0768201	0.604563889	0.205356228	2.9439764	0.003240247	0.031330803
Chp1	3632.402835	0.364633884	0.123872229	2.943628996	0.003243886	0.031343791
Schip1	268.6913745	-0.66597502	0.226288739	-2.943032087	0.003250147	0.03138208
Heg1	129.5907487	-0.825619821	0.280570574	-2.942645797	0.003254205	0.031399055
Bard1	33.97774614	-1.048322889	0.356449685	-2.941012249	0.003271416	0.031541631
Bcl11a	4094.346173	0.408405111	0.138875263	2.940805301	0.003273602	0.031541631
Mtus2	3145.470981	-0.373332743	0.127008303	-2.939435733	0.003288105	0.031659021
Fam131b	5574.592845	-0.373040104	0.126995171	-2.937435356	0.003309392	0.031841525
Rgs13	470.3779242	1.030951544	0.351495024	2.933047333	0.003356527	0.0322723
Rnase4	65.72404565	0.982142894	0.335097864	2.930913617	0.003379667	0.032471921
Lrp10	1172.111578	0.421510974	0.143863191	2.929943181	0.00339024	0.032550594
Mkx	180.2041197	-0.835054303	0.285119573	-2.92878631	0.003402883	0.032649022
Ociad2	727.8901014	0.500848623	0.171041011	2.928237036	0.003408901	0.032683791
Lonrf2	8743.873421	0.365438557	0.124822092	2.92767532	0.003415065	0.032719914
Larp1b	1119.618623	-0.431616592	0.14746534	-2.926901953	0.003423568	0.032765599
Vav2	882.162007	0.506760872	0.17314472	2.926805236	0.003424633	0.032765599
Efhd2	604.2232528	0.584449449	0.199763996	2.92569963	0.003436826	0.032859233
Mllt4	6771.457716	-0.428173531	0.146379947	-2.925083258	0.003443641	0.032901349
Lsamp	2827.011587	-0.381475946	0.130425759	-2.924851269	0.003446209	0.03290286
Letmd1	3142.872074	-0.431994132	0.147745727	-2.923902703	0.003456728	0.032980227
Tril	10.70883191	-0.901364017	0.308345666	-2.923225833	0.003464252	0.033028929
Jarid2	1959.364779	-0.388279615	0.132860331	-2.92246461	0.003472731	0.033068126
Endov	1087.698518	0.439059829	0.150238343	2.922421929	0.003473207	0.033068126
Bicc1	34.61259659	-1.046803563	0.358342061	-2.921241118	0.003486399	0.033170595
Asap1	2466.703551	-0.428192415	0.14659055	-2.921009676	0.00348899	0.03317213
Mrps23	1735.534302	0.375844996	0.128688456	2.920580495	0.003493799	0.03319474
Zrsr2	1888.132815	0.379841039	0.130096488	2.919687115	0.00350383	0.03326689
Pim3	572.0769948	-0.624080215	0.213838903	-2.918459669	0.003517654	0.033374932
Gm2762	87.07581508	-0.9934825	0.340565706	-2.917153672	0.003532417	0.033491728
Cspg5	12093.43706	-0.404795744	0.138841014	-2.915534332	0.0035508	0.033642663
Tspan9	1977.974763	0.402670553	0.138178175	2.914140047	0.003566699	0.033769859
Anp32e	1501.865841	0.454509779	0.15601807	2.913186784	0.003577605	0.033849651
Tmem18	1259.750356	-0.530388978	0.182241021	-2.910370974	0.00361	0.034132499
Sp3	1868.754866	0.399573858	0.137428485	2.907503906	0.003643258	0.034423115
D19Bwg1357e	3516.802361	-0.410419919	0.141204853	-2.906556761	0.003654306	0.034503623
Ube2h	6977.67352	0.351229235	0.120918945	2.90466671	0.003676444	0.034688655
Pkd2l2	87.3539089	0.93705801	0.322856385	2.902398878	0.003703167	0.03491667
Bmper	35.9504837	-1.031379105	0.355477572	-2.901390092	0.003715111	0.035005112
Rfx5	390.5076705	0.620923869	0.21404296	2.900931049	0.003720557	0.035032255
Zhx1	3551.719402	0.567785314	0.195777193	2.900160667	0.003729714	0.035094272
Twf2	750.338213	-0.457968906	0.157945085	-2.899545156	0.003737045	0.035139034
Nrg3	2612.201492	-0.43081186	0.14868788	-2.897424191	0.003762407	0.035353157
Tal1	251.2924792	-0.657306725	0.227077807	-2.894632163	0.003796031	0.035644572
Uros	759.9461418	0.464442257	0.160539699	2.893005647	0.003815744	0.035805057
H2-DMa	713.7474792	0.601167313	0.208018396	2.889971871	0.003852763	0.036127591
Dsc3	120.6257467	-0.889391919	0.307802361	-2.889490242	0.00385867	0.036158146
Ctnnbip1	4026.912773	0.363276258	0.125769121	2.88843759	0.003871609	0.036254507
Lsm11	8319.608049	-0.357709525	0.124096863	-2.882502558	0.003945299	0.03691924
Bbx	323.2197768	0.67371869	0.233775298	2.881907093	0.003952763	0.036963745
Tgm3	301.4474533	-0.689794796	0.239420978	-2.881095893	0.003962951	0.03703365
Dhx34	460.0786085	-0.552145383	0.191735362	-2.879726391	0.003980204	0.037154597
Ccpg1	2482.352041	0.380656853	0.13218919	2.879636778	0.003981336	0.037154597
Fbl	1434.830628	-0.38940581	0.135275627	-2.87861028	0.003994316	0.037250271
9930021J03Rik	3072.789165	0.397892407	0.138251271	2.878037976	0.00400157	0.037273593
Ankfn1	36.12777249	-0.997299797	0.346527435	-2.877982221	0.004002277	0.037273593
Ppm1e	9304.670843	-0.365985944	0.127231668	-2.876531845	0.004020716	0.037419795
Pdlim1	35.38044397	-1.014473444	0.352981368	-2.874014142	0.004052908	0.037693702
Gm11110	53.05393872	-1.001061806	0.348459638	-2.87281997	0.004068259	0.037792064
2210016F16Rik	169.6456086	0.765155756	0.266360628	2.872630843	0.004070695	0.037792064
Lars2	47841.16816	1.029671184	0.358470616	2.872400519	0.004073663	0.037792064
Arid1b	7042.074955	-0.365156191	0.127128858	-2.872331239	0.004074556	0.037792064
Tpk1	163.2111413	0.799521802	0.27841623	2.871678138	0.004082986	0.037844539
Gpsm2	423.1267182	-0.624242484	0.217402121	-2.871372564	0.004086935	0.037855446
Sema4c	496.8558262	-0.537979895	0.187392078	-2.870878541	0.004093328	0.037888951
Rnmt	3480.905725	-0.334599532	0.116566962	-2.870449103	0.004098892	0.037905349
Fam171b	14110.44373	0.35556221	0.123875746	2.870313366	0.004100652	0.037905349
Hist1h1c	1143.613926	-0.435908845	0.15192656	-2.869207637	0.004115016	0.038012387
Atpaf1	509.7005541	-0.539911839	0.188413225	-2.865572943	0.004162554	0.038417209
1700020I14Rik	1067.551665	-0.455014425	0.158794608	-2.865427432	0.004164467	0.038417209
6530402F18Rik	2408.450414	-0.454085855	0.158512108	-2.864676137	0.004174359	0.038480227
Asb1	2076.196726	0.456861759	0.159491997	2.864480766	0.004176935	0.038480227
C130074G19Rik	44.99269646	-1.026459783	0.35850718	-2.86314986	0.004194521	0.038616182
Mgll	242.2831878	-0.694327623	0.242649286	-2.861445154	0.004217145	0.038798299
Elovl4	2988.327041	0.413797447	0.144658792	2.860506729	0.004229646	0.038887107
Flywch2	322.6631211	0.792367944	0.277103993	2.859460579	0.004243622	0.038989344
Pde4d	5595.838912	-0.320800713	0.112204129	-2.859081176	0.0042487	0.039009756
Ccdc110	55.31264075	0.991367195	0.346770906	2.858853436	0.004251752	0.039011537
Nsf	23704.05359	0.393144474	0.137597819	2.857199883	0.004273966	0.039189025
6430548M08Rik	5988.541929	0.382575649	0.133917481	2.856801407	0.004279335	0.039211919
Lypd6b	500.7084763	-0.529553648	0.185516852	-2.854477329	0.004310771	0.039473477
Epha8	450.4428886	-0.572020371	0.200434356	-2.853903796	0.004318561	0.039518304
Ovol2	88.75332948	-0.859863787	0.301457506	-2.852354875	0.004339662	0.039659929
Cad	584.8838583	-0.528349036	0.185235334	-2.852312383	0.004340243	0.039659929
Phactr2	301.1495043	-0.61395613	0.215262425	-2.852128655	0.004342752	0.039659929
Tango2	1338.165511	0.470199024	0.164937023	2.850779141	0.004361225	0.039802009
Metap2	2380.944517	0.376986865	0.132312867	2.849207881	0.004382823	0.039970886
Mtfp1	660.3122364	0.495063057	0.17376685	2.849007497	0.004385585	0.039970886
Sv2a	9969.495926	0.34762461	0.122124637	2.84647406	0.004420633	0.04025006
Dennd2a	672.131026	0.487897744	0.171410659	2.846367587	0.004422112	0.04025006
Atl3	466.8379638	0.586931367	0.206235725	2.84592481	0.004428265	0.040269864
Chd4	5459.396641	-0.349434794	0.122790228	-2.845786663	0.004430186	0.040269864
Prkcd	50.87568916	-1.016471146	0.357329587	-2.84463191	0.004446277	0.040389236
Gng13	211.7378509	-0.667912733	0.23482634	-2.844283714	0.004451139	0.04040652
Emx2os	56.54671675	0.997369269	0.350740326	2.843611625	0.004460538	0.040464935
Smarca1	2811.449576	-0.423429006	0.148948952	-2.842779361	0.004472202	0.0405352
Tmem2	1857.596175	-0.402176383	0.141490259	-2.842431601	0.004477084	0.0405352
Rnf182	592.3823059	0.477300312	0.16793973	2.84209288	0.004481843	0.0405352
Spsb3	1085.574608	-0.45479613	0.160033295	-2.841884431	0.004484775	0.0405352
R3hdm1	9996.999143	0.347301689	0.122212195	2.841792416	0.004486069	0.0405352
Cep135	243.1460447	0.723963719	0.254756198	2.841790408	0.004486097	0.0405352
Rftn1	186.7727361	-0.817452521	0.287781479	-2.840532067	0.004503834	0.040668553
Pdik1l	1682.173015	0.412096628	0.145122725	2.839642295	0.004516415	0.040755195
Rab3il1	67.8722157	-0.991659819	0.349507163	-2.837309001	0.004549556	0.041027137
Dscam	4721.322755	0.335073181	0.118114051	2.836861321	0.00455594	0.041057586
Spsb1	114.1986225	-0.928016991	0.327183526	-2.836380553	0.004562804	0.041084525
Tktl2	56.29446891	-0.96664004	0.340818564	-2.836230601	0.004564947	0.041084525
Abcc5	872.4784631	-0.47809384	0.168614059	-2.835432837	0.004576364	0.041141695
Nhsl1	556.8047445	0.489893901	0.172779797	2.835365653	0.004577326	0.041141695
Zfp599	87.25497389	-0.89768963	0.316781139	-2.833784968	0.004600027	0.041318535
Trpc6	66.92962405	-0.986250998	0.348149196	-2.832840082	0.004613646	0.041413616
Smtn	38.72457923	-1.005380137	0.354972895	-2.832272974	0.004621837	0.041440628
Mettl15	163.7845383	0.733612048	0.259024457	2.832211511	0.004622726	0.041440628
Serpinh1	15.63494224	-0.905160342	0.319731496	-2.831001492	0.00464025	0.041570433
Igip	273.7306536	0.651578687	0.230256987	2.829788994	0.004657871	0.041700928
Fnbp1l	7709.958524	-0.338339953	0.119640224	-2.827978267	0.004684299	0.041906824
Filip1	867.313325	0.599618471	0.212044672	2.827793151	0.004687008	0.041906824
Sep-02	2727.458951	-0.387305525	0.137090613	-2.82517902	0.004725421	0.042222623
Vopp1	4625.234076	-0.394328998	0.139634267	-2.824013095	0.004742645	0.042348809
Tfb2m	950.7866908	0.429755507	0.152270853	2.822309703	0.004767911	0.042546593
Cox20	454.5975339	0.52281758	0.185318079	2.821190369	0.00478458	0.042667454
Cpe	28691.59929	0.335351676	0.118910801	2.820195257	0.004799444	0.042772065
Rtn4r	1387.521796	-0.478282447	0.169831853	-2.816211678	0.004859364	0.043259495
Siae	694.8621504	0.516096046	0.183263748	2.816138222	0.004860475	0.043259495
Cdyl	184.613683	-0.770084476	0.273570247	-2.814942355	0.004878598	0.043381274
Stac2	162.1911686	-0.80557606	0.286191345	-2.814816289	0.004880512	0.043381274
Kcnc4	1468.157281	0.388143407	0.138023328	2.812158015	0.004921032	0.043712981
Gsk3b	17845.92379	0.317834708	0.113053372	2.811368669	0.004933123	0.043765585
Hectd2	835.1090349	0.482248462	0.171536085	2.811352844	0.004933365	0.043765585
Cabp7	27.79742782	-1.001625656	0.356415786	-2.810272987	0.00494995	0.043884195
Slc17a8	50.81749214	0.987034655	0.351502738	2.808042581	0.004984364	0.044136687
Prdx6	1274.570775	-0.434962308	0.154900652	-2.808008249	0.004984895	0.044136687
Gm2721	19.02079698	0.9857436	0.351235504	2.806503299	0.00500824	0.044314647
Hsph1	5221.415626	-0.466080225	0.166159324	-2.805019993	0.005031346	0.044490262
Sncb	7493.737945	0.335365321	0.119571937	2.804715967	0.005036094	0.044503422
Dhx40	1342.905329	-0.430194199	0.153452532	-2.803435003	0.005056142	0.044651688
Elovl2	1164.51908	0.431358259	0.153893839	2.802959892	0.005063597	0.044688613
Trib1	502.0510133	-0.66567115	0.237568884	-2.802013207	0.005078479	0.044791008
Adcy2	646.9415491	-0.473339066	0.168974293	-2.801248979	0.005090523	0.044868242
Dck	661.5760712	0.465265331	0.166182812	2.799719925	0.005114696	0.045052224
Cst6	10.4978152	-0.883316567	0.315525901	-2.79950573	0.005118091	0.045053059
Grb14	1140.052288	-0.567571052	0.202816708	-2.79844327	0.005134959	0.045172419
Bcl2	536.6333505	0.601220361	0.21504569	2.795779632	0.005177469	0.045517054
Msrb1	291.3297753	-0.650654948	0.232748867	-2.795523587	0.005181572	0.045523812
Exd1	41.72139754	1.000098779	0.357998441	2.793584169	0.005212746	0.045768246
Nav1	21419.17958	0.414514725	0.148394547	2.793328558	0.005216867	0.045774994
Lcp2	64.1335675	-0.949961875	0.340253707	-2.791922187	0.005239595	0.045944892
Specc1	131.1368332	-0.815510123	0.292168428	-2.79123288	0.005250768	0.045990074
Lin7b	689.8798352	-0.454119683	0.162697594	-2.791188678	0.005251485	0.045990074
Thsd7b	128.425641	-0.90989943	0.326181985	-2.789545324	0.005278211	0.046194495
Ywhab	19567.74202	0.402439312	0.144353306	2.78787734	0.005305463	0.046289832
Camk4	17430.59005	-0.445444809	0.159782299	-2.787823258	0.005306348	0.046289832
Nelfb	1666.206813	-0.373794942	0.134088337	-2.787676768	0.005308748	0.046289832
Trak1	9363.233688	0.321424693	0.115302561	2.787663096	0.005308972	0.046289832
Apc	65063.58695	-0.370707875	0.132981706	-2.787660695	0.005309012	0.046289832
Cpsf1	1706.959884	-0.369282673	0.132471714	-2.787634145	0.005309447	0.046289832
Tab3	2512.997326	-0.448514257	0.161037197	-2.785159362	0.005350142	0.046614863
Ccdc85a	1864.436342	-0.394489665	0.141689938	-2.784175574	0.005366398	0.046726675
Tmem192	318.5699813	0.670256906	0.240761101	2.783908623	0.005370816	0.046735344
Bambi	107.8434922	-0.841383315	0.302279608	-2.783460387	0.005378243	0.04677016
Slc36a1	1520.322259	0.477016171	0.171463075	2.782034384	0.005401932	0.046946259
Lipg	215.07709	-0.864209329	0.310709837	-2.781403177	0.005412447	0.046980092
Gm5607	27.0551307	-0.973149471	0.349879127	-2.781387616	0.005412707	0.046980092
Neurod6	9105.338126	0.370217923	0.13313112	2.780851861	0.005421647	0.047000331
Cnrip1	14124.59383	0.302959215	0.1089454	2.780835312	0.005421923	0.047000331
Vstm2b	200.4401624	0.670027722	0.241110012	2.778929491	0.005453836	0.047246971
Uchl5	990.9599252	0.434525824	0.156416683	2.778001773	0.005469432	0.047334785
Bai2	6103.787426	-0.350848885	0.126299397	-2.777914169	0.005470907	0.047334785
Camkv	20746.47522	-0.332750235	0.119820552	-2.777071448	0.005485112	0.047427634
Scn1b	1767.08637	0.371309115	0.133722592	2.776711913	0.005491183	0.047450073
Rgmb	2279.082323	-0.387567054	0.139618791	-2.775894643	0.005505004	0.047516311
Cdc40	1137.229379	-0.435595128	0.156923312	-2.77584715	0.005505809	0.047516311
Vwa3a	368.1250656	0.59323035	0.213836048	2.774229859	0.005533257	0.047723028
Gm9899	306.4075322	-0.612383949	0.22078971	-2.773607283	0.005543856	0.047784257
Sec14l3	644.2241732	0.618948017	0.223258341	2.772339947	0.005565488	0.047940447
Naa11	28.57363421	0.992286084	0.358044461	2.771404653	0.005581502	0.048048072
Ssfa2	77.98473208	-0.969653753	0.349973233	-2.770651185	0.005594432	0.048129038
Rnf11	4956.638179	0.370048859	0.133593982	2.76995157	0.005606463	0.048202164
Gm1943	384.2957387	-0.540016747	0.195152719	-2.767149491	0.005654882	0.048587855
Aip	1316.535412	0.387714965	0.140157508	2.766280381	0.005669976	0.04866491
Ppp1r21	2075.931476	0.386228552	0.139623085	2.766222731	0.005670979	0.04866491
Bach2	1132.563196	-0.521947182	0.188822942	-2.764214864	0.005705995	0.048934644
Lmbrd2	1888.348577	0.362642239	0.131230077	2.763407969	0.005720122	0.048999721
BC048403	191.4397169	-0.679294606	0.24582095	-2.763371493	0.005720761	0.048999721
Sh3pxd2a	1807.008616	0.486426393	0.176046446	2.763057154	0.005726274	0.049016186
Chd1l	287.3448384	0.6870264	0.248724382	2.762199641	0.005741336	0.049103681
Chrna1	24.17948974	0.966482556	0.349912925	2.762065894	0.005743689	0.049103681
Serinc2	33.088245	-0.985981477	0.357040571	-2.761539045	0.005752964	0.049152199
Sema5a	310.0772277	-0.609582598	0.220899293	-2.759549787	0.005788107	0.049421526
Abcd2	126.9026225	-0.852856731	0.309213964	-2.758144296	0.005813053	0.049603509
Maz	3378.947896	-0.395395553	0.143602951	-2.753394356	0.00589808	0.05028102
A930012L18Rik	23.83384961	-0.975644561	0.354354871	-2.753298007	0.005899816	0.05028102
Crem	505.5621501	0.570962666	0.207445327	2.752352505	0.005916879	0.05039498
Prss12	3198.020222	0.461457674	0.167715423	2.751432553	0.005933524	0.050505236
Sgms1	619.4706571	0.493173948	0.179451364	2.748231814	0.005991763	0.050969184
Acyp2	263.2472875	0.663189731	0.241395449	2.747316624	0.00600851	0.051053932
Jag1	9.284570895	-0.828072731	0.301415626	-2.747278711	0.006009204	0.051053932
Kat6b	2681.856807	-0.355457949	0.129438206	-2.74615941	0.006029746	0.051196591
Arhgap6	61.31185192	0.975416418	0.355359257	2.744874096	0.006053412	0.051365587
Lsp1	164.2957577	0.784641905	0.285891642	2.744543003	0.006059521	0.051385495
Bhlhe41	114.8593742	0.797060907	0.290661094	2.742234592	0.006102274	0.051715922
Hipk2	989.3868773	0.469509548	0.171284623	2.741107405	0.006123249	0.051861486
Fbln7	29.81050449	-0.981176458	0.357993598	-2.740765374	0.006129626	0.051883314
Mastl	107.3162573	0.781428964	0.285400133	2.738011913	0.006181184	0.052287299
Erc1	13343.11574	0.345198709	0.126086709	2.737788228	0.006185389	0.052288627
Col5a2	51.84830672	-0.945313844	0.345307982	-2.737596268	0.006189	0.052288627
Hspa13	3121.932833	0.476468883	0.174145074	2.736045705	0.006218239	0.052503163
Draxin	771.0276164	-0.513206196	0.187710219	-2.734034395	0.006256351	0.052765242
Rara	519.5493712	-0.628328378	0.229820197	-2.733999824	0.006257008	0.052765242
Dpp4	10.32076479	0.835617903	0.305964825	2.7310914	0.006312496	0.053200315
Mfsd4	375.321237	-0.622840606	0.228105748	-2.730490628	0.006324013	0.053264498
Chrdl1	51.35539537	-0.971363664	0.355789485	-2.730164053	0.006330282	0.053284423
Tcp11l1	1037.383286	0.425170373	0.155864633	2.72781814	0.006375475	0.053631765
Arxes2	245.8881333	0.787117539	0.288622778	2.727149754	0.006388404	0.053706389
Pura	1460.788514	0.389543943	0.142849522	2.726953075	0.006392213	0.053706389
Shc4	220.0780474	0.637664917	0.233855395	2.726748802	0.006396171	0.053706596
D930015E06Rik	1503.926021	-0.472210937	0.173260436	-2.72544008	0.006421583	0.053886831
Klhdc10	10456.95908	0.326491713	0.119803889	2.725217986	0.006425905	0.053889973
Wdr96	124.9298747	0.882313064	0.323836489	2.724563455	0.006438656	0.05396376
Zfp697	1944.288174	-0.349057327	0.128145294	-2.723918423	0.006451244	0.054036094
Snrpb	1503.138547	-0.411516298	0.151088843	-2.723670982	0.006456079	0.054043436
Coro2b	2238.476045	0.374864784	0.13767142	2.722894732	0.006471267	0.054137386
Slc36a4	1365.35633	0.412525784	0.151555702	2.721941692	0.006489959	0.05426051
Adra2a	220.0434379	-0.700912112	0.257616483	-2.720758023	0.006513242	0.054391629
Lrrc7	9266.040615	-0.36248739	0.133231207	-2.720739358	0.00651361	0.054391629
Tpm3	22515.28799	-0.329444731	0.121105674	-2.720307978	0.006522114	0.054429353
Garem	3199.855155	-0.426092779	0.156740017	-2.718468367	0.006558493	0.054671275
Oprm1	19.44451121	-0.890816811	0.327698565	-2.718403149	0.006559786	0.054671275
Iqsec3	2251.637704	0.362787006	0.133478821	2.717936856	0.006569037	0.054671275
Pcyox1	5229.006192	0.340203063	0.125171716	2.717890864	0.00656995	0.054671275
Nudt19	860.5522081	0.517724593	0.190491775	2.717831745	0.006571124	0.054671275
Sri	2644.77077	0.364917345	0.134291751	2.717347445	0.006580749	0.054718002
Pcdha2	212.2567493	-0.643954833	0.237015375	-2.716932742	0.006589	0.054753263
Eefsec	1224.366919	0.444004559	0.163437139	2.716668691	0.006594258	0.054763629
Fstl5	759.9920063	-0.500724587	0.184334017	-2.716398175	0.006599649	0.054775083
Ncoa3	1391.097531	-0.426358716	0.157017045	-2.715365815	0.00662026	0.054912763
Cyp1a1	22.62331958	0.934915164	0.344444126	2.714272337	0.006642154	0.055060913
Magi2	7726.371948	0.349755865	0.12888421	2.713721613	0.006653205	0.055090136
C530008M17Rik	6651.994925	0.29483762	0.10864805	2.713694531	0.006653749	0.055090136
Ric8	3559.304121	-0.354675591	0.130735311	-2.712928808	0.006669143	0.055184129
Dgkd	7398.378976	-0.298964482	0.110208593	-2.712714814	0.006673451	0.055186329
Stx16	2149.376237	0.352476682	0.129987945	2.71161055	0.006695721	0.055336972
Hnrnpul2	3585.135201	0.318445762	0.11754911	2.709044422	0.00674773	0.055715553
Egflam	111.0841112	0.924074757	0.341119407	2.708948063	0.00674969	0.055715553
Mrgpre	541.9623285	0.536030659	0.19793841	2.708067923	0.006767617	0.055829774
Gkap1	1228.18706	0.399985523	0.147790249	2.706440543	0.006800876	0.056070265
Scoc	7665.573254	0.395092369	0.146024814	2.705652263	0.006817039	0.056169603
Prkca	5618.843472	-0.457656147	0.169212792	-2.704619078	0.006838276	0.056284297
Hps1	89.71135752	-0.831906057	0.307592272	-2.704573987	0.006839204	0.056284297
Ago4	282.5819092	-0.61157461	0.226220743	-2.70344179	0.006862547	0.056442379
Esyt1	116.2486492	0.830098186	0.307264967	2.701571205	0.00690127	0.056726695
Slc9a3r1	59.94706924	0.945062208	0.349911108	2.700863695	0.006915968	0.0568133
Fam217b	685.3531818	0.479300939	0.17749767	2.700322431	0.00692723	0.056871604
Atp6v0a1	28159.32391	0.300412429	0.111312897	2.698810636	0.006958776	0.057096255
Slc37a1	66.43361387	-0.939413362	0.348179582	-2.698071367	0.006974249	0.05718884
Abca4	14.79705297	-0.873443363	0.323863425	-2.696949687	0.006997784	0.057347388
Amn	12.18574334	-0.848718932	0.314867117	-2.695482906	0.007028668	0.057565933
Mbp	540.3933717	-0.578742766	0.214793951	-2.694409046	0.007051357	0.057717132
Nrcam	15695.10749	-0.327377637	0.121519389	-2.694036229	0.007059249	0.057747111
Rgs10	679.5034728	-0.46117464	0.171271504	-2.692652484	0.007088611	0.057944746
Rplp2	1544.367425	-0.378272714	0.140491366	-2.692497953	0.007091897	0.057944746
Klf6	9271.568907	-0.432158435	0.16052805	-2.692105435	0.007100249	0.057963535
Chgb	13371.31317	-0.427163681	0.158679465	-2.691990935	0.007102688	0.057963535
Mfsd2a	31.69327116	-0.964800031	0.35851722	-2.691084212	0.007122021	0.058086594
Fam163a	98.31207026	-0.882902748	0.328238546	-2.689820437	0.007149048	0.058264763
Exd2	912.5569648	-0.424252005	0.157739401	-2.689575351	0.007154299	0.058264763
Glrx5	957.9940764	0.448894654	0.166908544	2.689464803	0.007156669	0.058264763
Grid2	292.2749383	-0.956845564	0.355825901	-2.689083516	0.007164849	0.058296594
Arhgef18	1830.715406	-0.399110233	0.148516096	-2.687319721	0.007202797	0.058569308
Fstl4	283.7008732	-0.730904525	0.272002806	-2.68712127	0.007207078	0.058569308
Glt25d1	2759.851256	-0.335723792	0.124956132	-2.686733234	0.007215455	0.058569308
Esr1	37.47411762	-0.963247413	0.358520367	-2.686729967	0.007215526	0.058569308
Tspan13	5521.132381	0.441344138	0.164356535	2.685285	0.007246798	0.058729525
Olfm3	84.0466671	-0.863029813	0.321416111	-2.685085728	0.00725112	0.058729525
Clcn2	258.2406208	-0.604323514	0.225069735	-2.685050093	0.007251894	0.058729525
Fdft1	18226.31704	0.316639511	0.117928022	2.685023512	0.00725247	0.058729525
Elk1	1299.620995	-0.611831409	0.22789168	-2.684746582	0.007258482	0.058743363
Prdm16	110.0918128	0.793402164	0.295648077	2.683603332	0.007283346	0.058909673
Ginm1	430.3003018	0.628444208	0.234231915	2.682999919	0.007296501	0.058981128
Ccdc92	2019.42801	0.35532836	0.13259186	2.679865565	0.007365173	0.059501012
Kcnd3	2233.258103	0.433432532	0.161776926	2.679198722	0.007379858	0.05958439
Plcz1	20.11943652	0.90161296	0.336590954	2.6786607	0.007391725	0.059644933
Alg5	509.0361485	0.517741116	0.19337393	2.677409073	0.007419399	0.059832871
2610301B20Rik	940.1709348	0.44392521	0.165871672	2.676317216	0.007443616	0.059992729
Galc	251.8299576	0.635893846	0.23763503	2.675926386	0.007452301	0.060027297
Ano4	133.8510381	-0.759666243	0.284002474	-2.67485783	0.007476095	0.060183443
Pxylp1	670.0336556	-0.638901186	0.23888911	-2.674467609	0.007484801	0.060218022
Stard13	21.16575655	-0.93205112	0.34858345	-2.673824935	0.007499159	0.060298006
Podn	25.30955276	-0.957413126	0.358130587	-2.673363188	0.00750949	0.060345537
Gucy1a3	15031.50572	-0.347644166	0.130069532	-2.672756337	0.007523087	0.060419242
BC003331	1441.234593	0.390718547	0.146231918	2.671910153	0.007542084	0.060536197
Fam19a1	805.574951	-0.407126056	0.152462093	-2.670342825	0.007577384	0.060760797
Zfyve16	491.977068	0.541780573	0.202894365	2.670259342	0.007579268	0.060760797
Rnft2	4564.830956	0.329212814	0.12330059	2.670001929	0.007585081	0.060760797
Syt6	98.50057395	-0.862528322	0.323059005	-2.669878593	0.007587868	0.060760797
Zfand2a	4407.123189	0.309798808	0.116045546	2.669631171	0.007593461	0.060769941
Homer1	3933.868183	-0.404170146	0.151417987	-2.669234699	0.007602431	0.060806084
Chic2	286.1682916	0.607581289	0.227720234	2.668104091	0.007628062	0.06097537
Bfsp1	48.73200811	-0.935687304	0.351158062	-2.664575886	0.007708547	0.061582677
Mapk11	551.1271785	-0.604582884	0.22700563	-2.663294672	0.007737962	0.061781517
Slc41a2	3015.533682	0.350385447	0.131619586	2.662107195	0.007765314	0.061963669
Mc4r	47.32374011	-0.951806573	0.358099843	-2.657936302	0.007862075	0.062699131
Myadm	974.49549	0.404398381	0.15216613	2.657611004	0.007869667	0.062723037
Cbs	77.11772468	0.855289203	0.321902688	2.656980615	0.007884398	0.062798519
Rnf125	43.34257285	-0.952516588	0.358518595	-2.656812228	0.007888337	0.062798519
Car11	2026.783511	-0.396794552	0.149379452	-2.656286027	0.007900657	0.062859949
Dysf	40.51015494	0.936400852	0.352663277	2.655226428	0.007925519	0.06299328
Tmtc1	1851.82452	-0.468459409	0.176432353	-2.655178601	0.007926643	0.06299328
Emr1	8.835292455	-0.809812158	0.305033562	-2.654829693	0.007934846	0.063021786
Clgn	343.4271862	0.608216104	0.229120403	2.654569806	0.007940961	0.063033684
Hadha	1417.961439	0.410282791	0.154631782	2.653288895	0.007971161	0.063236646
Creb3l1	230.6633817	-0.817330717	0.308122031	-2.652620176	0.007986969	0.063285994
Pbdc1	817.8332117	0.416959383	0.157191711	2.652553238	0.007988553	0.063285994
Acot2	251.6542398	0.660391958	0.248975485	2.652437678	0.007991288	0.063285994
Aldh2	341.6711303	-0.606496007	0.228673133	-2.652239898	0.007995971	0.06328637
Trpm8	54.81332502	0.926810735	0.349560881	2.651357132	0.008016902	0.063415276
Ston2	426.0857558	0.606375113	0.228733913	2.651006596	0.008025227	0.063444372
Thbs3	208.2112955	0.67427673	0.254519729	2.649212042	0.008067969	0.063735766
Trim32	12164.93584	0.279758193	0.105606295	2.649067409	0.008071423	0.063735766
Tram1	1111.869511	0.419673076	0.158519976	2.647445989	0.008110231	0.063973123
Ddr1	740.2557889	-0.490985544	0.185458118	-2.647420073	0.008110853	0.063973123
Vash2	1740.795377	-0.372731084	0.140846266	-2.646368231	0.00813612	0.06410781
Klf3	403.0935136	0.628444957	0.237478973	2.646318321	0.00813732	0.06410781
Polr2k	736.0135836	0.590075115	0.223214655	2.643532144	0.008204597	0.064600559
Zcchc12	5381.190784	0.456711697	0.172842793	2.642353145	0.008233216	0.06478853
Slmo2	2087.227891	0.369551924	0.13993301	2.640920269	0.008268117	0.065025696
Syt11	22307.76914	0.296467479	0.112305605	2.639827993	0.008294812	0.065198078
Hpcal1	2389.412235	0.362515445	0.137488259	2.6367011	0.008371656	0.065764224
Abca6	18.80119942	-0.861022378	0.326849668	-2.634307026	0.008430921	0.066191701
Mndal	34.77141431	-0.922950458	0.35051603	-2.633119112	0.008460467	0.066368041
Nudt1	200.6293712	0.632591222	0.240271448	2.632818949	0.008467947	0.066368041
B230216N24Rik	129.8332409	-0.789324946	0.299802293	-2.63281824	0.008467965	0.066368041
Lamtor4	867.2072933	0.42397278	0.161116968	2.631459523	0.008501899	0.066595773
Rasl11b	203.6469712	-0.631410167	0.240042255	-2.630412573	0.00852813	0.066762936
Hhip	61.9371725	-0.911258955	0.346662214	-2.628665363	0.008572067	0.067034334
Znfx1	1362.156084	-0.360223547	0.137037809	-2.62864351	0.008572618	0.067034334
4833424O15Rik	3352.682419	-0.451784204	0.171903441	-2.628127758	0.008585626	0.067097629
St8sia3	4613.019736	0.349294218	0.132920102	2.62785096	0.008592615	0.067113832
Enpp2	686.3498082	-0.918089059	0.349741418	-2.625051002	0.008663599	0.067629569
Egfr	30.06178207	-0.92363248	0.351881138	-2.624842258	0.008668912	0.067632373
Mrpl39	1633.619649	-0.395908957	0.150868289	-2.624202602	0.00868521	0.067720833
Nrep	36622.69885	0.333175427	0.127046449	2.622469416	0.00872951	0.068027399
Nup50	3066.009566	0.305490841	0.116579496	2.620450863	0.008781358	0.068392405
Vegfc	8.950637114	-0.774260608	0.295560914	-2.619631253	0.008802489	0.068517893
Aph1b	1218.445319	0.375924237	0.143627778	2.617350505	0.00886153	0.068938155
Tnfsf9	28.7020336	-0.935406039	0.357527621	-2.616318249	0.008888367	0.06910756
Mrpl18	716.0543151	-0.445615574	0.170342868	-2.615991961	0.008896865	0.069134263
Rab5b	8678.57813	0.309511677	0.118408049	2.613941194	0.008950444	0.069511042
Lgr4	1161.43898	0.411118605	0.157343721	2.612869474	0.008978559	0.069689744
Tspan12	84.1882433	-0.799352624	0.305962795	-2.612581129	0.008986136	0.06970893
Spata20	9.738460614	-0.769927396	0.294842034	-2.611321682	0.009019301	0.069926472
Sult4a1	11301.83227	0.275950229	0.105710622	2.610430473	0.009042835	0.069981767
Micu3	1891.256459	0.345089744	0.132198486	2.610391049	0.009043877	0.069981767
Elovl5	2570.90545	0.392572504	0.150390021	2.610362721	0.009044627	0.069981767
Pik3r4	966.3304392	0.44279994	0.169644231	2.610167991	0.009049777	0.069981767
Endod1	1775.897104	0.377309735	0.144558595	2.610081634	0.009052062	0.069981767
Adra1d	10.1371002	-0.768436567	0.294582	-2.608565921	0.00909225	0.07025268
Bysl	1298.180556	-0.364085252	0.139584745	-2.608345572	0.009098105	0.070258163
4833422C13Rik	44.58315532	-0.924697399	0.354682986	-2.607109543	0.009131014	0.070472436
Lyrm5	275.5492357	0.638007992	0.244768599	2.606576146	0.009145249	0.070542419
Btg1	474.9996719	-0.495665795	0.190220041	-2.605749605	0.009167345	0.070672932
Dnal1	3603.219222	0.338630585	0.130005674	2.604736973	0.009194481	0.07084213
Dusp10	29.90958927	-0.929911038	0.357096201	-2.604091099	0.009211827	0.070905815
Dennd5b	6870.908633	0.283952897	0.109043113	2.604042473	0.009213134	0.070905815
Tspan5	4094.49064	0.352639886	0.135492369	2.602654953	0.0092505	0.071153284
Gnptab	9366.199029	0.300722577	0.115566295	2.602165082	0.009263725	0.071214885
Glt28d2	25.95481595	-0.86936031	0.334217338	-2.601182555	0.0092903	0.071378992
Mrps27	871.0890512	0.431412906	0.165947179	2.599700157	0.009330525	0.071647725
Trove2	3126.314615	-0.319338892	0.122933965	-2.597645751	0.009386528	0.072037246
Gabrd	112.135757	-0.750493677	0.289117573	-2.595807891	0.009436881	0.072352332
Mturn	22851.19084	0.353318592	0.136113709	2.595760517	0.009438182	0.072352332
Bhlhe22	26892.97269	-0.393470286	0.151629146	-2.594951535	0.009460426	0.072482151
Cflar	264.5005293	-0.562018638	0.216722577	-2.593262987	0.009507004	0.072798165
Igf1r	1941.437486	-0.426352535	0.164428692	-2.59293271	0.009516139	0.072827266
Nr4a3	3306.71287	-0.827236239	0.319132931	-2.592136879	0.009538181	0.072955065
Ppfibp2	20.13806027	0.877938797	0.338737291	2.591798486	0.009547568	0.072985971
Slc30a5	1419.700267	-0.36669087	0.141516708	-2.591148949	0.009565608	0.073082958
Tcf4	34454.34742	0.322098837	0.124362998	2.589989322	0.009597891	0.073254603
Dtd2	605.8350258	0.469228209	0.181182303	2.589812583	0.00960282	0.073254603
Rasip1	493.4040266	-0.512167621	0.197766125	-2.589764157	0.009604171	0.073254603
Ube2e3	4474.986079	-0.399487997	0.154274788	-2.58945744	0.00961273	0.073278955
Gaa	4997.597372	-0.408373317	0.157734577	-2.588990479	0.009625776	0.073320921
Elavl4	6313.813983	0.285901546	0.110434623	2.588875998	0.009628976	0.073320921
Tenm4	8074.191214	0.420624994	0.162490182	2.588617898	0.009636195	0.073334992
Tbc1d1	674.7038893	0.422905575	0.163398279	2.588188668	0.009648212	0.073385536
Diablo	1139.876823	0.417301651	0.161263	2.587708593	0.009661668	0.073446966
Fah	56.82251023	-0.921382334	0.356125952	-2.587237265	0.009674895	0.073506587
Socs5	1078.957866	0.387032948	0.149721396	2.585020965	0.009737308	0.073939634
Mtfr1	474.7541979	-0.481856311	0.186446772	-2.584417554	0.009754362	0.074027964
Fbn2	215.502553	-0.665851604	0.257664652	-2.584179087	0.00976111	0.074038016
Frmd5	1117.636217	-0.435764424	0.168652067	-2.5838072	0.00977164	0.074076737
Azi2	2200.070126	0.349616533	0.135321048	2.583607923	0.009777287	0.074078414
Nrxn1	41071.13464	-0.298357736	0.115556891	-2.581912104	0.009825461	0.074402115
Myo6	228.7237515	0.791395292	0.306621169	2.581019747	0.009850895	0.074553362
Pxdn	437.1227599	-0.916031619	0.35504648	-2.580032955	0.009879089	0.074725317
Akap6	21319.09442	0.294263796	0.11412521	2.578429393	0.009925058	0.075016923
Arsj	55.99160252	0.88086753	0.341645965	2.578305085	0.00992863	0.075016923
Fam171a2	3774.936914	-0.388292665	0.150699616	-2.576600229	0.009977727	0.07534619
Kctd6	694.9900544	0.411197448	0.15963022	2.575937362	0.009996875	0.075449055
Elovl7	130.8598136	0.777218747	0.301789225	2.575369435	0.010013307	0.075492579
2210039B01Rik	62.57263185	-0.841520261	0.326758832	-2.575355828	0.010013701	0.075492579
Ptger1	247.2368767	-0.660852529	0.256677997	-2.574636457	0.01003455	0.075608005
Lpcat1	2076.269915	0.501402385	0.194826051	2.573590039	0.010064945	0.075795201
Fam98c	73.51472781	0.816909825	0.317498573	2.572955897	0.010083406	0.075892358
Vbp1	1224.439173	0.444921028	0.173014568	2.571581302	0.010123524	0.07611384
Ctdsp2	913.8543345	-0.44659272	0.17366569	-2.571565628	0.010123983	0.07611384
Nrd1	5262.453545	0.337836298	0.131472598	2.569632785	0.010180637	0.076497652
Dis3l	1460.048381	0.398429692	0.155103382	2.568800804	0.01020511	0.076608073
Ythdc2	1820.458648	-0.423867136	0.165008991	-2.568751761	0.010206554	0.076608073
Mpeg1	241.6343104	-0.683301491	0.266284511	-2.566057967	0.010286164	0.077163183
Itgal	25.89785946	0.903846516	0.352407615	2.564775779	0.01032425	0.077406361
Trim59	62.23032434	-0.856659529	0.334052613	-2.564444931	0.010334098	0.07743767
Mecom	34.3778443	0.912764715	0.356073389	2.563417385	0.010364736	0.077624655
Plekha3	694.4104862	0.45187106	0.176344614	2.562431871	0.010394198	0.077802622
Cd151	386.4164479	0.520089415	0.203012148	2.561863517	0.010411222	0.077887353
2610307P16Rik	35.46888852	-0.912586602	0.356248793	-2.561655279	0.010417466	0.077891383
Gpr165	40.4039814	-0.909475619	0.355198401	-2.560472163	0.010453004	0.078114319
Gprasp2	4246.248353	0.359596283	0.140470008	2.559950619	0.010468704	0.078188847
Pdp2	539.2956158	-0.489925497	0.19145078	-2.559015416	0.010496909	0.07835664
Grid1	2020.282153	-0.395591211	0.154609414	-2.558648929	0.01050798	0.078396421
Hmox1	134.1399224	0.882632457	0.345025569	2.558165355	0.010522604	0.078462653
Gtf3c6	857.702509	0.456747658	0.178615981	2.557148894	0.010553403	0.078649355
Odf3l2	55.09051753	0.887457079	0.347124105	2.556598827	0.010570104	0.078730841
Gpr149	51.36336314	-0.914938152	0.357931174	-2.556184592	0.010582696	0.078781653
Tnc	708.9903061	-0.896174634	0.35078028	-2.55480335	0.01062478	0.079051841
Tpcn1	829.6629273	0.442785472	0.173423531	2.553202954	0.010673728	0.079372772
Vezf1	1639.631447	0.357402763	0.140068328	2.55163154	0.010721984	0.079664843
Plcl1	648.6130725	-0.52545407	0.205935718	-2.551544119	0.010724674	0.079664843
Mxd4	504.4732003	0.530422071	0.208226463	2.547332667	0.01085499	0.080589003
AW495222	24.33944469	0.88487499	0.347425081	2.546951961	0.010866839	0.080601926
Satb2	16094.4432	-0.288492299	0.113279659	-2.546726403	0.010873865	0.080601926
Abat	2802.700921	0.446921616	0.175501694	2.546537334	0.010879757	0.080601926
Mrpl34	674.2115213	-0.46858211	0.184008918	-2.546518482	0.010880345	0.080601926
Susd4	1107.022569	0.380839055	0.149589588	2.545892791	0.010899866	0.080661551
Qsox1	640.3033186	0.467123757	0.183482108	2.545881784	0.01090021	0.080661551
Hnrnpa3	2121.013571	-0.385077687	0.151269393	-2.545641787	0.010907706	0.080673296
Zfp105	120.3680777	-0.746683922	0.29344114	-2.544578178	0.010940982	0.080875595
Rph3a	438.5717001	-0.485094636	0.190681408	-2.544005953	0.010958922	0.080964371
Sema3e	904.0855735	-0.911552949	0.358543885	-2.542374827	0.011010203	0.08128787
Pitrm1	957.2258963	-0.407310549	0.16021752	-2.542234761	0.011014616	0.08128787
Jph4	9742.840183	-0.375325313	0.147682933	-2.541426457	0.011040117	0.081432046
Dnah7b	42.84787424	0.903121595	0.355396682	2.541164958	0.011048378	0.081448976
Mlec	4244.905582	0.304513812	0.119852947	2.540728621	0.011062174	0.081506675
Smc5	1292.381053	-0.390206153	0.15360218	-2.540368586	0.01107357	0.081546629
Acer2	19.84855566	0.900135555	0.354592933	2.538503932	0.011132755	0.081938279
Hnmt	329.8394609	-0.649272407	0.255869545	-2.537513429	0.011164308	0.082107377
Btrc	3072.583842	0.307065649	0.121015609	2.537405298	0.011167758	0.082107377
B3glct	926.3076486	0.461277211	0.181837766	2.53675142	0.011188637	0.082216609
Lmo1	1273.787969	-0.421756576	0.166280315	-2.536419147	0.01119926	0.082250402
Zbtb17	999.694769	-0.396539965	0.156361938	-2.536038951	0.011211426	0.082295486
Prmt10	1243.573679	0.372532473	0.146942018	2.535234493	0.011237208	0.082440406
Srfbp1	931.8057353	-0.37802499	0.14927619	-2.532386373	0.011328908	0.083068519
Tmcc3	153.8457986	-0.733521809	0.289800102	-2.531130269	0.011369561	0.083321858
2210408F21Rik	34.43829326	0.901705988	0.356398692	2.530048532	0.011404675	0.083524147
Egr2	86.94134759	-0.847933723	0.335164492	-2.529903207	0.0114094	0.083524147
Ccl27a	1297.060594	-0.392206434	0.155140837	-2.528067024	0.011469245	0.08391726
Papln	9.508149398	-0.771505603	0.305204007	-2.527835758	0.011476803	0.083927578
Rtn1	40403.84572	0.285653118	0.113025826	2.527326072	0.011493474	0.084002328
Dennd4b	1031.208817	0.398528656	0.157699029	2.527147184	0.01149933	0.084002328
Fez2	1989.57325	-0.340626627	0.13481639	-2.526596561	0.011517372	0.084089135
Zfp41	964.5577751	0.387553826	0.153403078	2.526375803	0.011524613	0.084097028
2010107G23Rik	1285.597262	0.388005926	0.15361893	2.525768966	0.011544537	0.084197419
Pianp	835.4201418	0.453424669	0.179550931	2.525326188	0.011559094	0.084258578
Zdhhc23	170.9103154	-0.652881086	0.258562176	-2.525044829	0.011568353	0.08428107
Mybl1	142.7792671	-0.720648345	0.285591231	-2.523355993	0.011624066	0.084600793
Abhd6	991.3188177	0.369303232	0.146354987	2.523338902	0.011624631	0.084600793
Bloc1s2	1320.789362	0.396093212	0.157013276	2.522673376	0.011646652	0.084715899
Ano2	44.12847596	-0.890306116	0.353262672	-2.520238301	0.011727541	0.085258847
Dmrt2	8.079535198	-0.733026317	0.290895385	-2.519896685	0.011738928	0.085296216
Mto1	695.0785665	-0.435087039	0.172682135	-2.519583386	0.011749381	0.085326753
Calhm2	25.3966743	0.896210209	0.355842744	2.518556928	0.011783683	0.085520556
Hck	95.73593882	0.87392877	0.347016058	2.51841017	0.011788595	0.085520556
Klf5	499.2277842	-0.748244984	0.297163517	-2.517957086	0.01180377	0.08558517
Gpr156	139.1400094	-0.762205434	0.302978722	-2.515706148	0.011879418	0.086087949
Pcnxl4	1685.715003	0.362032211	0.144068308	2.512920539	0.01197363	0.086724653
Kcna1	6178.186858	0.359043451	0.142900128	2.512548138	0.011986275	0.086770209
Pdia4	1849.800488	-0.405287784	0.161319442	-2.512330686	0.011993664	0.086777688
Camk2g	6728.349078	0.289498117	0.115269753	2.511483796	0.012022481	0.086940109
Psd	17991.18432	-0.325328073	0.129660666	-2.509072963	0.012104848	0.087489406
Dnah6	137.6413792	0.730227615	0.291064157	2.508820127	0.012113515	0.087505725
Decr2	791.0880436	-0.465295423	0.185489829	-2.508468657	0.012125573	0.087546505
Dusp26	1046.118107	-0.488422205	0.194824728	-2.506982613	0.01217667	0.087868963
Sez6	3597.259449	-0.442882906	0.17670409	-2.506353455	0.012198361	0.087978988
Foxg1	2015.126392	-0.413654449	0.165074471	-2.505865658	0.012215202	0.088053936
Cdc42bpg	8.517831743	-0.726188199	0.289911382	-2.504862673	0.012249894	0.088257419
Gls2	92.82116932	0.79294583	0.316744609	2.503423289	0.012299834	0.088570482
Cd1d1	16.68468081	0.781169627	0.312156158	2.502496288	0.012332092	0.088755957
Fam98a	853.0885403	0.446613278	0.178565335	2.501119701	0.012380133	0.089028034
Ccnd1	272.3641489	0.542045557	0.216728108	2.501039494	0.012382937	0.089028034
Sh3rf2	31.74284035	0.896340278	0.35842909	2.50074646	0.012393187	0.089054831
Mttp	504.984119	0.522338545	0.208928773	2.500079519	0.012416543	0.089175731
Kcnv1	834.3018968	-0.515472796	0.206258647	-2.499157265	0.012448905	0.089361148
Raver2	128.8207384	-0.803249289	0.321435779	-2.498941751	0.012456478	0.089366328
Fat4	14931.65771	-0.432410816	0.173062559	-2.498580969	0.012469165	0.089366328
Tmem158	843.3264514	-0.570018253	0.228137049	-2.498578178	0.012469264	0.089366328
Ssbp4	850.7878931	-0.426653662	0.170788468	-2.498140927	0.012484655	0.089429694
Steap3	7.923011033	-0.723629235	0.289774763	-2.497212761	0.012517383	0.08961711
Azin1	6660.391338	0.307642607	0.123215963	2.496775587	0.012532824	0.089680634
Kcng2	46.06846809	-0.864269298	0.34625774	-2.496028818	0.01255924	0.089822578
Eri1	749.6693835	0.39125851	0.156853583	2.494418692	0.012616363	0.090164484
Gpr45	457.7193754	0.530031358	0.212496249	2.494309241	0.012620254	0.090164484
Faah	1965.54828	0.357906922	0.143583734	2.492670383	0.012678648	0.090534303
Cobl	4661.943922	0.339140539	0.136145539	2.4910147	0.012737885	0.090875134
Serping1	17.83951826	0.847257728	0.340132423	2.490964318	0.012739691	0.090875134
Exph5	14.58749947	-0.807018623	0.324731695	-2.485185881	0.01294838	0.092315529
Cux1	4133.456007	-0.337956903	0.136001686	-2.484946414	0.012957094	0.092329437
Rnf112	1782.314541	0.384632693	0.154798405	2.484732925	0.012964866	0.092336629
Grem1	17.21861022	-0.846497166	0.340899923	-2.483125136	0.013023533	0.092706097
Fpgt	1300.973319	-0.35718778	0.143879813	-2.4825427	0.013044843	0.092809403
Nab1	2064.31269	0.331784438	0.133667102	2.482169761	0.013058505	0.092858211
Ttc7	83.50184114	0.769406598	0.310023451	2.481769028	0.013073198	0.092914304
H2afy	2045.076376	0.32207788	0.129834903	2.480672552	0.013113478	0.093152087
Rfk	1291.879006	0.40895834	0.164949204	2.47929865	0.013164103	0.093461837
Glipr1	9.220634834	0.746994971	0.301314815	2.479117965	0.013170774	0.093461837
Rps3a1	10764.64832	-0.270652395	0.109261287	-2.477111538	0.01324505	0.09392525
Smco3	169.7178041	0.638906947	0.257937604	2.476982561	0.013249838	0.09392525
Iffo2	1538.03147	0.343023026	0.1385251	2.476251781	0.013276991	0.094068894
Hs3st2	1120.681463	-0.530581707	0.214431868	-2.474360326	0.0133475	0.094484138
H2-Ob	8.392470982	0.73000447	0.295033742	2.474308416	0.01334944	0.094484138
Pla2g4e	1023.932407	0.402135623	0.162551125	2.473902422	0.013364619	0.094542564
Denr	3820.137798	0.303931076	0.122886967	2.4732572	0.013388775	0.094616025
Gdf11	711.4719992	0.442156033	0.17877761	2.473218164	0.013390237	0.094616025
Dsg2	8.197421996	-0.713130245	0.288358306	-2.473069897	0.013395794	0.094616025
Stk17b	18.91107891	-0.851562875	0.344540171	-2.471592419	0.013451278	0.094958788
Agpat5	1373.696319	0.347573868	0.140694093	2.470422616	0.013495351	0.095220688
Ccno	62.96453727	0.844710975	0.342064347	2.469450512	0.013532073	0.095430475
Yes1	311.7226837	-0.574393441	0.232622594	-2.469207449	0.013541269	0.095446023
Crat	1267.168152	0.365156243	0.147914002	2.468706402	0.013560242	0.095530439
Gpr158	1264.868108	-0.467683525	0.18946259	-2.468474254	0.013569041	0.095543126
Neurl4	6146.612169	-0.276833623	0.112178353	-2.467798953	0.013594665	0.095666593
Mpp5	394.9475741	-0.487001246	0.197368984	-2.46746594	0.013607317	0.095666593
Ints10	1686.032664	-0.345921665	0.140193506	-2.467458557	0.013607597	0.095666593
Pcdha1	109.5621003	-0.723992035	0.293465206	-2.467045567	0.013623302	0.095727711
2610100L16Rik	360.0698337	0.55796886	0.226241074	2.466258001	0.013653295	0.095889115
Rn45s	38812.58827	0.876844941	0.35566181	2.465389637	0.013686433	0.096050299
Dll1	297.5536487	-0.526183557	0.213436951	-2.465288013	0.013690316	0.096050299
Pitpnc1	4658.110756	-0.292691988	0.118744328	-2.464892373	0.013705441	0.096107031
Dapk3	1294.567155	-0.355539102	0.14431354	-2.46365727	0.013752755	0.096389301
Trip12	5804.559624	0.298803791	0.121351668	2.462296524	0.013805048	0.096706167
Akap8l	1843.078986	-0.443130527	0.180008515	-2.46171981	0.013827264	0.096812121
Upf3b	909.4355526	0.418350686	0.170029345	2.460461663	0.01387584	0.097102428
Sil1	544.9143494	0.458636	0.186419533	2.46023575	0.013884578	0.097107438
Ampd3	18.47058208	-0.861169342	0.350083706	-2.459895524	0.013897747	0.097107438
Parp11	2137.2662	0.348385634	0.141627006	2.459881378	0.013898294	0.097107438
Rgs6	1164.148956	-0.534310357	0.217225107	-2.459708105	0.013905006	0.097107438
Pafah1b3	1487.805366	-0.404897013	0.164696977	-2.458436225	0.013954356	0.09740226
Ramp1	35.24423446	-0.881274077	0.358522434	-2.458072338	0.013968503	0.09745119
Slc39a10	3401.31957	-0.304154181	0.123761464	-2.457583889	0.013987514	0.097533977
Fam124a	5808.019973	-0.283432329	0.115338806	-2.457389128	0.0139951	0.097537062
Eif4g2	37454.37668	0.260820436	0.106179871	2.456401901	0.014033611	0.097755558
Cd81	7296.994675	0.343875418	0.140135123	2.453884593	0.014132233	0.098386938
Slc8a2	5838.114142	-0.319512596	0.130215537	-2.45372099	0.014138663	0.098386938
AI597479	1099.390293	0.381024626	0.155319182	2.453171723	0.014160272	0.098487109
Sdc3	32213.36766	-0.299592673	0.122163848	-2.452384055	0.014191311	0.098652731
Iqch	8.863753384	0.701291935	0.286098537	2.451225169	0.014237086	0.098920579
Cln6	153.9078374	0.699392881	0.285504176	2.449676539	0.01429846	0.099296476
Mre11a	262.6646665	-0.581088782	0.23732394	-2.448504698	0.014345056	0.099546295
Polrmt	547.3576274	-0.500052789	0.204240611	-2.448351414	0.014351161	0.099546295
LOC100862268	18.91550624	-0.85883165	0.350798073	-2.448222259	0.014356307	0.099546295
Slc39a6	5691.718123	0.379578482	0.15509034	2.447466958	0.014386432	0.099704543
Ano5	62.23757393	0.815995752	0.333479638	2.446913274	0.01440855	0.099807174
Sesn1	1317.506386	0.351690239	0.143741808	2.44668023	0.014417869	0.099821079
Mettl16	1290.049627	0.35817416	0.146536016	2.444273913	0.014514402	0.10043098
Rhob	5871.488935	0.285159274	0.116671644	2.444118071	0.014520673	0.10043098
Thbd	11.38089372	-0.727997703	0.297914608	-2.443645538	0.014539704	0.100469827
Neo1	14295.66845	-0.329806776	0.134966851	-2.443613184	0.014541008	0.100469827
Zfp536	324.7906896	-0.580874212	0.23777384	-2.44296939	0.014566973	0.10059832
Ipcef1	390.5116874	-0.68601429	0.280834278	-2.442772642	0.014574916	0.100602289
Ngfr	55.89682589	-0.87439512	0.358192771	-2.441129999	0.014641383	0.101010007
Diap1	1316.466024	0.354396343	0.145204198	2.440675607	0.014659817	0.101049511
Sytl5	28.55266092	-0.868028948	0.355658615	-2.440623991	0.014661912	0.101049511
Pou3f3	2750.405897	0.377322499	0.154716422	2.43880058	0.014736098	0.101509558
Urod	312.1095785	-0.525113654	0.215364189	-2.438258917	0.014758199	0.101610536
Wls	753.9340693	-0.852393211	0.349784303	-2.436910985	0.014813325	0.101938675
Krt2	11.81406303	-0.793679226	0.325716292	-2.436719454	0.014821173	0.101941298
Snrpb2	950.9623863	-0.359331091	0.147480262	-2.436469034	0.014831439	0.101960544
Golph3	2247.515262	0.326886377	0.134445211	2.431372409	0.015041745	0.103353019
Slc16a14	536.566976	0.581487006	0.239185089	2.431117292	0.015052341	0.103353019
1700021K19Rik	6178.239839	-0.318152115	0.130872275	-2.431012329	0.015056702	0.103353019
Sec61g	1980.89243	-0.388444013	0.159832494	-2.430319418	0.015085521	0.103498806
Lpin1	613.8407582	0.458873368	0.188857206	2.429737141	0.015109777	0.103609392
Slc22a15	249.1768676	0.542997527	0.22349548	2.429568276	0.015116817	0.103609392
Fcrl5	14.58066576	-0.760732068	0.313159336	-2.429217273	0.015131461	0.103657723
Ptpn9	1908.442555	0.324229729	0.133493616	2.428803258	0.01514875	0.103724116
Gpr63	165.5834588	-0.692154207	0.285029071	-2.428363551	0.015167131	0.103772811
Tdo2	46.20429139	0.847551634	0.349035237	2.42826954	0.015171064	0.103772811
[truncated: 22,019 more rows]
