# Supplementary material for: Cohesin-dependence of neuronal gene expression relates to chromatin loop length
Source: eLife. 2022 Apr 26;11:e76539. doi: 10.7554/eLife.76539 (PMC9106336; doi:10.7554/eLife.76539)
Supplement: Supplementary file 2. [file elife-76539-supp2.xlsx]

## Sheet: Sheet 1 - In_Rest__KO_minus_WT_
Supplementary Data 2
Gene expression analysis total RNA-seq NexCre Rad21 lox/lox minus wild-type baseline
In_Rest__KO_minus_WT_23092015
rownames(testGenotype_TreatmentNone)	baseMean	log2FoldChange	lfcSE	stat	pvalue	padj
Rad21	2090.80049552909	-1.93084779269526	0.0772057301650681	-25.0091254699237	4.86438272363224e-138	8.2139966671254e-134
Nwd2	3112.05683877655	-3.29100133119266	0.146062133506722	-22.5315162265599	2.03857717072344e-112	1.7211707052418e-108
Slc17a6	7221.41583373281	2.27555541656109	0.109511474379776	20.7791505816977	6.68305518646169e-96	3.76166899595307e-92
Pcdh20	2932.60906612148	-3.58576412220759	0.179134738149545	-20.0171343606963	3.90547319721278e-89	1.64869551020337e-85
Plxnd1	885.064051999513	-3.40783248761464	0.195302911042028	-17.4489590013397	3.50563603686469e-68	1.18392340236994e-64
Prr16	151.017117522669	-3.10311449699169	0.188410510481094	-16.4699649136775	6.03053450246892e-61	1.6971934268115e-57
Carhsp1	3524.48209890689	1.68035599257755	0.104398257183539	16.095632608343	2.73759043251519e-58	6.60385029192165e-55
Egfem1	405.518110904829	-2.09578749569212	0.131948059323345	-15.8834279673359	8.25414407067872e-57	1.73968748424452e-53
Lipg	339.807058655745	-2.51672321048298	0.15852244218608	-15.8761319582041	9.27228909048957e-57	1.73968748424452e-53
Pex5l	741.427957998526	-1.72885601405247	0.109450008543203	-15.7958508826432	3.32279239111617e-56	5.61086723163877e-53
Gabrg1	815.115466385139	-2.31332431022992	0.14835373837812	-15.5932997410135	8.08473582703362e-55	1.24108044704809e-51
Crhr1	333.841684374259	-2.65437737300582	0.171219464160918	-15.5027781801205	3.32211076008562e-54	4.67476352456714e-51
Kcnip4	461.058857558265	-1.88292577455715	0.121625695463316	-15.4813155837211	4.63888476484903e-54	6.02555447224928e-51
Ldb2	661.22556907657	-4.20107748515933	0.273918853312917	-15.3369417049952	4.33125220585963e-53	5.22410891058183e-50
Ntf3	58.5380332532408	-4.39843225438922	0.292110048177441	-15.0574493477109	3.084600436727e-51	3.47243753163814e-48
Masp1	969.28448762822	2.36482515741231	0.159262463921733	14.8486033631532	7.10331334049353e-50	7.49665931672336e-47
Bmp3	260.416031691507	-2.2550836958036	0.153520424975035	-14.6891444325425	7.56630881827555e-49	7.51557004149417e-46
Vcan	2548.685587674	-2.90386900767092	0.200069554020219	-14.5142973996806	9.83603414426436e-48	9.22729292000267e-45
Acvr1c	311.090337447349	-2.31887611395083	0.160631435265402	-14.4360044478186	3.07138363452774e-47	2.72965179224397e-44
Sphkap	6785.69504300715	-1.57817256153579	0.109666489659194	-14.3906544874393	5.92327130514721e-47	5.00101796293579e-44
Nxn	527.637444067966	1.69624127754025	0.123578710588321	13.7259991584713	7.09443233133677e-43	5.7045992546168e-40
Kcnk9	280.142646412235	-2.5335530792513	0.184759327068342	-13.7127208647721	8.52018299567888e-43	6.5396277302288e-40
Klf5	150.392383387135	-2.95134083458526	0.215614692202512	-13.6880321300798	1.19707493365111e-42	8.78861188244895e-40
Fbxw7	4861.64078464781	-1.77058262814481	0.130239252534418	-13.594846359218	4.29661989924253e-42	3.02303015077539e-39
A930017M01Rik	763.934181725764	1.61206352796076	0.118729022146118	13.577670386073	5.43270261019239e-42	3.66946465102835e-39
Gabra5	5616.93342132986	-1.32622174979279	0.0984636485401559	-13.4691509958818	2.37582100873113e-41	1.54300436743977e-38
Cpne8	719.704206029671	-2.5713842440336	0.190992914458788	-13.4632441801313	2.57363512301944e-41	1.60957046990023e-38
Lama2	441.167504361957	2.11330226439012	0.15716669539532	13.4462473685951	3.23897458799692e-41	1.95333303188986e-38
Pcsk2	3119.95934890518	-1.78164146148035	0.132887069122689	-13.4071845608653	5.48830760350644e-41	3.19570904113137e-38
Crym	656.505179566186	-2.85195945303724	0.215628573292835	-13.2262594399497	6.18917508518147e-40	3.48368034961247e-37
D430036J16Rik	48.7934650888307	-3.48950403505092	0.265134663779982	-13.1612516647262	1.46636351547904e-39	7.98742397496098e-37
Rspo2	421.066102684317	-3.07477396983311	0.233666824585627	-13.1587955426953	1.51481406229787e-39	7.99348445498809e-37
Syt10	105.947928334667	-2.50982578176237	0.192285766347579	-13.0525822552334	6.14294135309745e-39	3.14332447540617e-36
Gabrq	168.625798729595	2.40913679910287	0.185572193994644	12.9822078795512	1.54365629855535e-38	7.6665236051193e-36
Cbln4	99.4195515450288	-3.31549916386876	0.256177471375354	-12.9421964627438	2.60085692980921e-38	1.25480200333595e-35
Lhfpl3	1019.76258544678	-2.07042144523128	0.160261687122354	-12.9190044258712	3.51662133286228e-38	1.64949077296423e-35
Kcnh1	769.432358482516	-1.85432556732349	0.148005447856359	-12.5287656243784	5.19651638630257e-36	2.37157772159744e-33
Prkg2	225.885556954617	-2.19270833798303	0.175670400061173	-12.4819453773628	9.3669722240137e-36	4.16238665722883e-33
Pcdh15	476.831399642363	-2.54322556657791	0.204197457723279	-12.4547366795545	1.31785728755453e-35	5.70598414298611e-33
Fstl1	1546.60176847185	-1.38567425715186	0.111280843143271	-12.4520467136275	1.36304293540667e-35	5.75408575181924e-33
Chsy3	208.647820252134	-1.68368789628789	0.135897132338613	-12.3894291756847	2.98158109666952e-35	1.22797508288687e-32
Tacr3	116.060109343032	-3.20799137549156	0.260712087479121	-12.3047282023258	8.54235011038776e-35	3.43443152295256e-32
Syndig1	473.187872944279	-1.74442227531508	0.141960095650616	-12.288117074874	1.04921482150977e-34	4.12024220372417e-32
Aldh1a3	119.818414911719	-4.26695893987324	0.350365786816642	-12.1785833561034	4.04242332230935e-34	1.55137182319354e-31
Calb1	1111.71366578374	-2.40691135226724	0.198202196910241	-12.1437168194318	6.19468119357724e-34	2.32451970299434e-31
Cnksr2	2659.95443519232	-1.5564606152629	0.129527647459776	-12.0164354544172	2.9126735513135e-33	1.06920446929304e-30
Pcdha12	142.905500435063	-2.16605435721301	0.185377740592389	-11.684543949512	1.52898019627475e-31	5.49326799878627e-29
Adcy8	1101.52247403406	-2.06641563720278	0.177929145743833	-11.6136995350825	3.51089583325864e-31	1.23510389667511e-28
Rorb	737.584400589867	-2.9294472566659	0.252772500780926	-11.5892640521241	4.67128915025219e-31	1.60978344063589e-28
Cdh12	633.285645562854	-2.34798859632305	0.202651441886156	-11.5863404398676	4.83345725414718e-31	1.63235518387058e-28
Brinp1	5954.42965831453	-1.69818898946058	0.147637051979172	-11.5024579988237	1.28211394255354e-30	4.24505412430571e-28
Man1a	320.512028837013	-1.97050913109597	0.171999273437218	-11.4564968311638	2.18161540134207e-30	7.08437647443502e-28
Lrrc4c	4253.22093716928	-1.41527594610475	0.124434065654968	-11.3737017162892	5.65378899710219e-30	1.80131850952958e-27
Klf14	49.1912128550715	-3.59401764790288	0.316362442471598	-11.3604434831911	6.58097043467807e-30	2.05789382888841e-27
Chrna5	215.513565572957	2.3936141325283	0.212526041703776	11.2626862728878	2.00550589132152e-29	6.15726772379187e-27
B3galt2	5446.82891916099	-1.80663255299458	0.160887278965952	-11.2291820994555	2.93179818165245e-29	8.84041858846131e-27
Rgs7	2605.61429599032	-1.02919500126503	0.0920495381001628	-11.1808817567897	5.05848660745543e-29	1.4985544711139e-26
Nr3c1	959.863155299365	-1.29456722113193	0.11634962148829	-11.1265271392586	9.3196079448054e-29	2.71329137510317e-26
Lypd1	1753.75084506602	-2.24624922200516	0.202821742176819	-11.0749922463781	1.65894513897041e-28	4.74795722316175e-26
Glis3	464.208353064836	-1.97366286210602	0.178418277122999	-11.0619993306258	1.91774384598046e-28	5.39717043053769e-26
Lrrtm3	1027.21089214414	-1.80324438019301	0.16352860329277	-11.0270884963446	2.8287495265035e-28	7.83053516467837e-26
Tshz2	99.9428342728896	-2.66547702376671	0.243618259266982	-10.9412037988729	7.32211541867725e-28	1.99421356386748e-25
Fosl2	3056.58649624227	-2.23888344147426	0.20489798458429	-10.9268202223494	8.58025665776312e-28	2.29978117338076e-25
Gpr6	75.2056795470392	-2.78694709548258	0.257203663841395	-10.8355653020602	2.33518615234638e-27	6.16124271383141e-25
St3gal1	202.725920655877	-2.30970219684478	0.21398018763315	-10.7940002408286	3.67439687279361e-27	9.54551778369121e-25
Slco3a1	1423.79600637345	-1.42696907668956	0.132617949437372	-10.7599995531785	5.31704243888994e-27	1.36035725186508e-24
Wnt7b	1148.77410252082	-2.10539367280981	0.19594181335067	-10.7449943266671	6.25657694241647e-27	1.57684415297977e-24
Kctd16	572.233021003323	-1.55924539934574	0.145209853236041	-10.7378760090829	6.75812744220377e-27	1.67820205866254e-24
Slc24a4	196.92978249879	-2.61376227086379	0.243598252099064	-10.7298071654506	7.37499142258348e-27	1.8048421037934e-24
Satb1	1098.64594979922	-1.81909738190716	0.169941219150716	-10.7042740483923	9.71894314504551e-27	2.34448677067484e-24
Diras2	4501.17457877575	-1.12689236804267	0.105455378268245	-10.6859639266212	1.18412490453749e-26	2.81621593493239e-24
Bace2	207.211088975352	-2.39592343231605	0.224680709319116	-10.6636810947267	1.50519370032874e-26	3.5300973366321e-24
Cntn5	1337.37386934011	-1.20586519024276	0.113745835623619	-10.601400777721	2.93550009606542e-26	6.79025405783023e-24
Smoc2	82.7461265836945	-2.47542752391829	0.233577396095664	-10.5978898870183	3.04779263666488e-26	6.95473330577341e-24
Itga4	119.260704436478	-2.24269257567845	0.21175050024224	-10.5912031995808	3.2735675794223e-26	7.37032828615e-24
Mgat4c	164.336051672582	-1.61045020849233	0.152892295463311	-10.5332332385498	6.07125875753252e-26	1.34893783394334e-23
1600029O15Rik	129.182884931141	2.42013112279763	0.230630710208234	10.4935336695296	9.25027633603175e-26	2.02857358714587e-23
Npc1l1	40.4273776037674	-2.7141077902546	0.258886208886496	-10.4837866873185	1.02553479738913e-25	2.22015135752728e-23
Chrm3	666.829217416671	-1.83627252797091	0.175247970126092	-10.4781386434873	1.08865246435784e-25	2.32696019153753e-23
Atp10a	77.1097231887507	-2.39560494567155	0.232744925369472	-10.2928342771325	7.59084729258602e-25	1.60223809228259e-22
Atf3	845.384718767184	-1.76709123018723	0.171938432135758	-10.2774650683797	8.90386220952504e-25	1.85618046012395e-22
Npr3	236.869686833125	-2.06664808808131	0.201289806590016	-10.2670280382882	9.92140478447802e-25	2.04308342915483e-22
Tex36	45.6447135981256	2.70748515626602	0.263918175785797	10.2588052081092	1.08035136873169e-24	2.19792930269919e-22
Glra3	127.367670200198	-2.23985909134881	0.218985058601928	-10.2283649197292	1.47996959444587e-24	2.97509125854917e-22
Cthrc1	18.0054502021497	-4.41155159682596	0.433716921402672	-10.1714998403998	2.65784118012053e-24	5.28003601970768e-22
9130227L01Rik	17.6827520554541	-3.18206067127794	0.3136365565895	-10.145694449269	3.46306498104579e-24	6.79968782208596e-22
Cdh7	107.251433695643	-2.30552715583103	0.228459229317301	-10.091635005163	6.01590248863566e-24	1.16763826923105e-21
Cdh20	235.241884307627	-1.66724209247065	0.16546275479839	-10.0762379696997	7.03689723961523e-24	1.35028462259253e-21
Rhou	973.376858583731	-1.27453213577191	0.126709934746689	-10.05865987004	8.41358049373017e-24	1.59631146311379e-21
Cartpt	110.030953025853	-2.35681038534571	0.235352917771003	-10.0139416484264	1.32371057625806e-23	2.48357519896595e-21
Hcrtr2	337.202834026357	-2.01820249847344	0.202385844436468	-9.97205364877672	2.02008022255993e-23	3.7484697404557e-21
Tcp11	70.403437262409	2.54608921805462	0.256990744830426	9.90731872361647	3.86889615462367e-23	7.10110657249732e-21
Sstr1	1024.1875103821	-2.06907383966965	0.209207269238661	-9.89006666546214	4.5972166095748e-23	8.34716125476131e-21
Klhl25	390.949853408744	1.36182793399963	0.137736655102762	9.88718604342177	4.73140435672778e-23	8.49941425188354e-21
Ahi1	12215.4740961778	0.946695455159844	0.0960250185955845	9.85884167486508	6.27693126510981e-23	1.1157080141331e-20
Pcdhb1	52.9094239540533	2.27969751005197	0.231436172264329	9.85022128454612	6.83932285142852e-23	1.20300839238773e-20
Pdzrn3	512.011166832868	-1.33537011752571	0.135616351614475	-9.84667484140742	7.08492099423169e-23	1.23075310714749e-20
Ndst3	465.325904684951	-1.44248733767523	0.14650704621424	-9.84585639359526	7.1428286450583e-23	1.23075310714749e-20
Bmp2	36.5628611532308	-2.46474323723479	0.250451527036307	-9.84119867984469	7.4814085092612e-23	1.27607135441803e-20
Asic2	491.03196557958	-1.5119155112431	0.154145577761601	-9.80836124654448	1.03637903016516e-22	1.75002963033688e-20
Cdh8	1299.1036131394	-1.45606948575697	0.148532454034351	-9.80303931031949	1.0924798931573e-22	1.82649658176773e-20
Ccbe1	247.74946271034	-3.13751769332561	0.320402019470258	-9.79244044251992	1.21331406626653e-22	2.00862954146829e-20
Nell1	1653.84650600894	-1.89476820905472	0.193902129085682	-9.77177619446075	1.48819782234862e-22	2.43977751729891e-20
Chst2	4390.55601946871	-1.11923154109605	0.115039837217993	-9.72907792780668	2.26637969320367e-22	3.67981610571512e-20
Fam19a2	3742.16652831958	-1.7301354154323	0.17837107475114	-9.69964114330843	3.02560899781449e-22	4.86575557496148e-20
B930025P03Rik	48.4773216024777	2.67779231516172	0.276151202391774	9.69683380687493	3.1099984428117e-22	4.95428619861493e-20
Layn	238.715623229928	2.20057352927739	0.227045518576603	9.69221301117618	3.25400203870438e-22	5.13524097435161e-20
Plxdc2	2500.06118228	-1.48312472812783	0.153213769888614	-9.68010074555349	3.66354799187308e-22	5.72802512877489e-20
Rab3c	14385.1229868157	-0.88224754292705	0.0913838640077528	-9.65430333359729	4.71352080630115e-22	7.30206535185333e-20
Cap2	978.751704103463	-1.29033533754858	0.134172224641737	-9.61700784938163	6.77739595339807e-22	1.04039189153709e-19
Chrm2	148.925596167553	-1.58763427351103	0.165353588685521	-9.60145035939002	7.88272885346653e-22	1.1991690037805e-19
1110032F04Rik	162.735886753854	-1.64434228696847	0.171603026355085	-9.58224526626913	9.49577890992307e-22	1.43165823815144e-19
Ankrd33b	502.482580470812	-1.45719251174628	0.152112013625553	-9.57973323088986	9.72959161935751e-22	1.45392817773868e-19
Trpc6	209.597488274575	-2.06260319734921	0.216336975231301	-9.53421482917536	1.51024043300212e-21	2.23701052207664e-19
Myo1h	23.6894129202611	2.85686051137268	0.301066034528375	9.48914916904525	2.32927637426874e-21	3.42018790051321e-19
Cdo1	1252.14743983004	0.939306218968365	0.0998657145477316	9.40569266661999	5.16886177012985e-21	7.52425860779419e-19
Kcnj2	766.929404257893	-1.7107347946722	0.182119729002144	-9.39346222424949	5.80597029878359e-21	8.37945422779998e-19
Cpne4	676.248134315789	-1.78750642826282	0.190628415019555	-9.37691491627547	6.79312826589928e-21	9.72108168626909e-19
Fxyd6	12594.3296958312	0.870894903038987	0.0929682940852826	9.36765497966531	7.41618679895567e-21	1.05235067468206e-18
Car10	235.097758387885	-1.76881582940359	0.188950761896844	-9.36125269698178	7.87968402870441e-21	1.10880287090586e-18
Csgalnact1	247.846995571253	-1.40382619071423	0.150229568710096	-9.34453984503705	9.22898980400492e-21	1.28793984983824e-18
Chst15	377.062342879703	-1.06810524615662	0.114488941790948	-9.32933110786313	1.06541137208897e-20	1.47463413353232e-18
Gpr26	1000.20309306301	-1.41244442300748	0.151625389965371	-9.31535558345513	1.21544723236051e-20	1.66862129801948e-18
Tec	76.6838018533426	-1.71613294222153	0.184451320737997	-9.30398836590168	1.35273910570746e-20	1.84212520475615e-18
Fhl1	4180.81808986872	0.580758813700205	0.0624595756821638	9.29815496434838	1.42903849789083e-20	1.93045952603076e-18
Ptprk	3476.61525597525	-1.8651986952042	0.201464055144188	-9.25822074746421	2.07867042080463e-20	2.78574831156405e-18
Il1rap	215.919496452692	-1.43795420054993	0.155349663444921	-9.25624277943641	2.11752494107846e-20	2.81547450039771e-18
Tex15	476.558665305382	-1.29601285935774	0.140030335436644	-9.25522927097552	2.13771130820756e-20	2.82010883987444e-18
Rtn4rl1	486.398494492578	-1.5870308490083	0.17246576182538	-9.20200526882056	3.51331103157688e-20	4.59889690536489e-18
Kcng3	57.6087477557038	-2.28421668548178	0.248439153365595	-9.19427012424405	3.77548926730502e-20	4.90407013597788e-18
Kcnd2	2257.36525418549	-1.30983191430583	0.143127732710465	-9.15148929911095	5.61539761781028e-20	7.23829039498812e-18
Vegfa	805.808483819502	-1.02878229698056	0.113103891262015	-9.09590541493656	9.38016094951803e-20	1.19994998328456e-17
Psd3	24128.8559450365	-1.05567054923707	0.116559893576554	-9.05689355784912	1.34218471730602e-19	1.70407001025785e-17
Grm7	1829.60239072706	-1.14972951107226	0.127166209406141	-9.04115579477777	1.55023905944439e-19	1.95353259386402e-17
Gpc5	163.087498557231	-1.7980386353328	0.199041374483102	-9.03349185566167	1.66279360747957e-19	2.07984687821481e-17
Nol4	7028.76300815732	0.886017573071406	0.0981756054429263	9.02482413094448	1.79984236658082e-19	2.23471604427087e-17
Cldn12	1170.26220238629	-0.850717186098288	0.0945403827502488	-8.99845295047792	2.28920589693706e-19	2.82157158946564e-17
2900055J20Rik	187.98259686789	-1.4178751544548	0.157939764746152	-8.97731585667279	2.77452499560747e-19	3.39497312143679e-17
Slit2	1396.42353646791	-1.49805933958408	0.166932433117799	-8.97404603530184	2.85817755246034e-19	3.47217166552844e-17
Arhgap20	3389.66202416327	-0.964710683884001	0.107517608161771	-8.97258319244319	2.89640396217941e-19	3.49347695038297e-17
Arpp21	10220.5954289512	-1.49689870636166	0.167273488464096	-8.94881023948369	3.59334274141487e-19	4.30334649159797e-17
Npy1r	963.488187364473	-1.02464054545905	0.114748824754513	-8.92942082545168	4.28244876412058e-19	5.09249505851691e-17
Rnase4	400.247978490851	1.66156350366942	0.186254960576477	8.9209087292318	4.62477629000609e-19	5.46111695335964e-17
Klhl14	113.793213540464	2.20670487903181	0.24755497419115	8.91399935001065	4.92241135453186e-19	5.77221098143229e-17
Dzip1	4106.09338695128	0.771417500084172	0.0865939389272459	8.90844682249987	5.17524479222307e-19	6.02684024561923e-17
Sema6a	1167.90763437205	-1.53745990340137	0.17266579453696	-8.90425290964195	5.37467872157374e-19	6.21622088304755e-17
Grm3	437.181892664326	-1.48615102855512	0.167139690027716	-8.89167036452371	6.01970492557866e-19	6.91488009342322e-17
Fam198b	56.4910032122335	-1.90675554120255	0.214516343187275	-8.88862598006312	6.18692103092163e-19	7.05894246811774e-17
Gabra4	3097.54819339377	-0.871547102254993	0.0981351930087398	-8.88108613774647	6.6210656496577e-19	7.50357815839731e-17
Diap3	171.177598674304	1.91967660729372	0.216268964194189	8.87633884245188	6.90971302910728e-19	7.7784942806337e-17
Col6a1	237.816847221394	-1.47847575992061	0.166679344071447	-8.87017985436073	7.30278590735063e-19	8.1665458828823e-17
Gucy2f	52.6597704044511	3.4131393954178	0.386689686976205	8.82655915162234	1.07945269754165e-18	1.19918672701897e-16
Drd1a	178.044586073288	-1.53454519075448	0.174691526377328	-8.78431382779215	1.57321903908521e-18	1.73629913032633e-16
Sla	1975.1829843502	2.19950433972322	0.251500727793526	8.74551878644638	2.21993287766553e-18	2.4341419852117e-16
Calcrl	273.152013174202	-2.55254219505472	0.294489707618136	-8.66767879835242	4.41018760703374e-18	4.80454373757237e-16
Acan	560.812753880783	-2.38011984738945	0.27470012707023	-8.66442936439176	4.53780122207707e-18	4.91187893820471e-16
Rgs4	15729.0002725427	-1.25607385720431	0.145295268751461	-8.64497425138407	5.3817432295729e-18	5.78828765443109e-16
Prokr2	1036.55979954823	1.27361454656271	0.147532354553187	8.63278126631918	5.98778729992254e-18	6.39935293332228e-16
Fgf10	96.6989565731934	-1.81879115370518	0.21083267541003	-8.62670432924105	6.31451391861002e-18	6.70609320941187e-16
Tnn	79.132595308326	-1.98650426287297	0.231304758924319	-8.58825504546986	8.83000878350777e-18	9.31897051989452e-16
Nfib	11456.8374728387	1.65212192794337	0.192672419357201	8.57477127995397	9.92839014357495e-18	1.04130929170439e-15
Gpr22	4453.67360278461	-1.14474449589614	0.133733472163511	-8.55989512106965	1.12970243312545e-17	1.17754044973805e-15
Btbd3	2097.89876452809	-1.20980009637141	0.141425011519752	-8.55435741790586	1.18527125793057e-17	1.2278828503936e-15
Magi3	2560.57590185307	-0.793344211384815	0.0928731093336129	-8.5422380824466	1.3164684148355e-17	1.35548083249465e-15
Slc16a11	24.263215754928	-2.40540068242049	0.282116396325991	-8.52627041088742	1.5114171466145e-17	1.54677514774136e-15
Ly6g6e	17.1914090906488	3.44869958956616	0.404584876363084	8.52404474573392	1.5407606147685e-17	1.56730624945668e-15
Cxcl12	43.3394934364664	-2.21939139472956	0.260839320220793	-8.50865349921519	1.75964833092813e-17	1.77924680934445e-15
Il1rapl1	463.123545049585	-1.11876961901301	0.131826484101561	-8.4866832839985	2.1261820825439e-17	2.13706610987121e-15
Prim2	552.642297212164	1.08737254127929	0.128443107766535	8.46579127667762	2.54419434343327e-17	2.54208672681741e-15
Arhgap29	207.509584687027	-1.46415548814286	0.173775602985429	-8.42555262642723	3.59051558643955e-17	3.56643801133048e-15
Spon1	266.255468942353	-1.8383151267148	0.218497902806561	-8.41342229422806	3.98218111610411e-17	3.93234563313064e-15
Gpr151	30.111232538591	2.47749725836765	0.294533643951056	8.4115934096118	4.04477872334302e-17	3.97093799548664e-15
Cdh18	355.661085854301	-1.48777957159703	0.176944969664327	-8.40814844535803	4.16533765906528e-17	4.06565848040325e-15
Pou3f1	221.161958817895	-1.74878440066408	0.208584548609632	-8.38405534983774	5.11347296190433e-17	4.96241979509865e-15
Vldlr	4593.21557374091	-0.715626780516481	0.0854505972515852	-8.37474287522554	5.53445721497066e-17	5.34027683039969e-15
Muc2	27.5252159943847	-2.63659260137032	0.314856838936808	-8.37394102752674	5.57226514727972e-17	5.34620848164576e-15
Mturn	18757.8815504992	0.896402407229308	0.107391903261382	8.34702039917803	7.00066303043524e-17	6.67871163457229e-15
2010300C02Rik	628.628787027447	-1.3615284745199	0.163550333692078	-8.32482847196937	8.44509389163176e-17	8.01145255360078e-15
1700019D03Rik	56.025011028291	-1.81286829446019	0.217915088607437	-8.31914993149458	8.85964200232035e-17	8.35776060621125e-15
Pmaip1	572.766756388123	-1.15724029779288	0.139567481506942	-8.29161840063236	1.11717849379652e-16	1.04803755812489e-14
Psmb9	63.4277474338568	2.00610054706031	0.242219511966341	8.28215914884299	1.20961785965851e-16	1.12848658443058e-14
Myc	188.660579792186	-1.38271956798106	0.167481525402186	-8.25595279634953	1.50695179452925e-16	1.3981531869462e-14
Sntg1	1264.20510179867	-1.2040646273433	0.145923403340598	-8.2513469380433	1.56619140643295e-16	1.4451753054113e-14
Zbbx	105.334276209896	1.80308679786109	0.218598137354357	8.24840879105115	1.6051746138527e-16	1.47309665921287e-14
Grm8	110.858443821108	-1.76999256373284	0.215166690598937	-8.22614577937643	1.9333369588666e-16	1.75701199050989e-14
Galnt3	89.6803391381931	-1.5587543543702	0.189490692313694	-8.22602068385369	1.93535609519625e-16	1.75701199050989e-14
Grm5	11388.4101089237	-0.998509690372222	0.121395826813045	-8.22523901015122	1.94802006270126e-16	1.75905169939965e-14
Fam189a1	312.467473336291	-1.33999750348153	0.163071664564445	-8.21723079273507	2.08256047301791e-16	1.87053809294577e-14
Gpr63	191.802921793886	-1.4577043640737	0.178193538896061	-8.18045577356184	2.82772263246682e-16	2.52639811491189e-14
Fbxo25	3587.97889202774	0.764367850131763	0.0936825179780844	8.159130077082	3.37446088076498e-16	2.99900770697881e-14
Ctxn2	305.424155723897	1.59528911653832	0.195577903915336	8.1567962668672	3.4402796912817e-16	3.04149543806193e-14
Vsnl1	7325.86927361715	-1.13275771711004	0.139029204861388	-8.14762422211509	3.71143557776706e-16	3.26413026907159e-14
Emp1	200.634871132995	-2.11314606289489	0.25979959245701	-8.13375434083701	4.16195534026308e-16	3.64138745469857e-14
E330009J07Rik	654.213482912013	0.899384431975835	0.11096403697157	8.10518846035013	5.26638206422486e-16	4.58392409981964e-14
Lpl	264.290937952006	-1.82979340385704	0.226097470577127	-8.09294062063756	5.82412613301465e-16	5.04339455805566e-14
Pcdhgc4	1883.00055575251	1.52775407059488	0.188954751906638	8.08529055331582	6.20161693722704e-16	5.34288283683754e-14
Tnr	1346.29712973605	-1.3091250911199	0.162095284927447	-8.0762687928021	6.67785964583221e-16	5.7239765471839e-14
Csrp2	1002.92974452253	1.06295755695916	0.13180433469972	8.06466311886341	7.34380909592739e-16	6.24758910008138e-14
Dgkk	224.399379800774	-1.47823091558214	0.183304437312741	-8.0643487809304	7.36272788651069e-16	6.24758910008138e-14
Fat3	3754.73221619483	-1.64650023169433	0.20460703710136	-8.04713393547002	8.47554127934283e-16	7.15589950214915e-14
Vipr1	93.7915109689407	-1.44080821567616	0.179131303308155	-8.04330783658495	8.74452884890008e-16	7.34627433544909e-14
Vwa3a	251.760882133007	1.56934169476946	0.195390428748032	8.03182481775105	9.60334308233666e-16	8.0278243212048e-14
Tcf24	12.5201953468415	-2.61945603229079	0.326625474202532	-8.01975424202991	1.05956942205509e-15	8.81373855212917e-14
Stxbp5l	2860.27495981541	-0.931651856808997	0.116279358606156	-8.01218606618353	1.12687205186431e-15	9.32762817048079e-14
Luzp2	3339.85639123542	-0.94361385824492	0.117869320036834	-8.00559346528883	1.18891889843785e-15	9.79321196049832e-14
Utrn	706.463747750679	-0.950703704734389	0.118818826873917	-8.00128843001637	1.23123998931947e-15	1.00925817765284e-13
Lmcd1	65.3828032827426	1.71535908840142	0.214590459857348	7.99364095468985	1.31010938588892e-15	1.06872014928117e-13
Pkib	141.793663635504	-1.74355752222097	0.218374962757262	-7.98423729628315	1.41393795185744e-15	1.14787289687811e-13
Slitrk4	3216.43785779963	-1.16672422875116	0.14624167049508	-7.97805594534985	1.48656017747789e-15	1.20105527066467e-13
Ankrd6	1087.33053678369	0.699926463751089	0.0878203689363821	7.96997863056261	1.58701808460564e-15	1.27611368460242e-13
Laptm5	64.0812322661407	2.33317181509631	0.293019428977646	7.96251573909902	1.68576160798944e-15	1.34908864988197e-13
Hpgd	21.6484022722791	-2.13539315430593	0.268446069461525	-7.95464488859648	1.79646027181616e-15	1.43089755423999e-13
Pabpc1l	13.8533295363295	-2.47612201822678	0.311713722485793	-7.94357719795166	1.96432346909876e-15	1.55725662437566e-13
Ephb3	88.5383305345663	-1.69304536248004	0.213775786795021	-7.91972462299212	2.38037175722958e-15	1.87826904170928e-13
Sh3bp4	523.682035108963	-1.3639152584582	0.172368469283001	-7.91278859835366	2.51686540546835e-15	1.97673438310412e-13
Alcam	7131.31850116379	-1.08898836341247	0.137635256566212	-7.91213233135935	2.5301723131445e-15	1.97798563332213e-13
Edil3	4202.88702728392	-1.27759458222169	0.161513334022359	-7.91014927624999	2.57080445255925e-15	2.00048866294541e-13
2610100L16Rik	325.520998220318	1.13841866611556	0.144093705805826	7.90054402271838	2.77688741022199e-15	2.15094132151415e-13
Esr2	23.7260447666455	-2.65402882731207	0.336190205505859	-7.89442638080014	2.91653488360121e-15	2.24879488787626e-13
Htr2a	407.426536162491	-1.31395891566893	0.166972839087547	-7.86929732314129	3.56638675097396e-15	2.73736393986119e-13
Robo3	18.8965279824214	-2.59324806521946	0.330433368212973	-7.84802115852912	4.22652919135112e-15	3.22937429525588e-13
C730002L08Rik	54.9388882997942	1.9418625607687	0.247612475382637	7.84234541401006	4.42207949618372e-15	3.36356911588101e-13
Islr2	3782.38827369246	1.39766618391967	0.178549510279576	7.82789144440203	4.96120012759142e-15	3.75671862576273e-13
Cenpf	267.240423388503	1.64213121723539	0.210759368827683	7.791498078446	6.62193207668167e-15	4.99187254673422e-13
Khdrbs2	349.197979713691	-1.20782928849003	0.155240485253531	-7.78037563150786	7.23095219194878e-15	5.42674927614431e-13
C1galt1	946.95856507591	-0.957771382044471	0.123110482173005	-7.77977118714011	7.26558388260873e-15	5.42861280715624e-13
Rgs2	4900.98899714031	-1.50586801640529	0.193615515852389	-7.77762055781391	7.39013326480107e-15	5.49734759072383e-13
Htr1b	20.3631614197025	-2.29883692324923	0.297099071566831	-7.73761059274169	1.01302554597908e-14	7.5026093725451e-13
Pcdha9	214.478200094672	-1.20226557338292	0.155559769020629	-7.72864077230332	1.08700935802619e-14	8.01538865486037e-13
Fam84b	328.951494465966	-1.50965016447698	0.195372095138942	-7.72705110933765	1.10066464419779e-14	8.06289390693556e-13
C1ql3	1619.09726293533	-1.61509719572958	0.209025879628343	-7.72678100243516	1.10300159451742e-14	8.06289390693556e-13
Trhde	420.845994870003	-1.46202660762642	0.189367430771123	-7.72058110348175	1.15800540039355e-14	8.42848240993343e-13
Pkp2	75.4436312869619	-1.46220644254089	0.18954764969506	-7.71418925475076	1.21753693545073e-14	8.80396874541846e-13
Wls	2370.8603055483	-1.09214281262596	0.141580611454691	-7.71392919838796	1.22002172594334e-14	8.80396874541846e-13
Pdgfc	124.397140400238	-1.60889234466698	0.209346437719048	-7.68531035061692	1.52626545777333e-14	1.09670291574299e-12
Dcn	58.8531836473464	-1.8304080257428	0.238616718850843	-7.67091272798436	1.70776717936076e-14	1.22192188943584e-12
Dfna5	324.277041142822	1.03978969304899	0.135806901159176	7.65638332201011	1.91242343423447e-14	1.36258152364908e-12
Pcdh11x	5891.72417461729	-1.67079629637828	0.218302475847776	-7.65358381708569	1.95454140977233e-14	1.3867389178746e-12
Ddn	6553.91134932709	-1.41759098640609	0.185412285531436	-7.64561518856712	2.07948698462169e-14	1.46921410972058e-12
Aldh1b1	400.484637760983	1.03957845292358	0.136143574354273	7.63589804259428	2.24251740540179e-14	1.57779787115061e-12
Erich5	14.0541689882302	3.09769453259361	0.406780213005663	7.6151553924047	2.63374417311684e-14	1.84536946503116e-12
D630023F18Rik	573.855235232219	0.90604102925267	0.119061055949549	7.60988571810243	2.74338390212982e-14	1.91424713104811e-12
Zdhhc2	4594.50984739583	0.772244604235475	0.101495477011856	7.60866027700194	2.76951658100151e-14	1.92452909410665e-12
Etv1	291.398292543226	-1.17332078300476	0.154501047143987	-7.59425780403477	3.09561551565481e-14	2.14231818021914e-12
Gm3279	531.553621034028	1.23076258236978	0.162083479301098	7.5933869859952	3.11650007758675e-14	2.14796817592367e-12
Htr1a	387.276298167958	-2.67999707591648	0.353591272543178	-7.57936432265651	3.4725212830267e-14	2.3836176579345e-12
Htr2c	356.593815606493	-1.35723848393507	0.179165407282332	-7.57533780947072	3.58194353373196e-14	2.44877321905254e-12
Tmem229a	502.69713308581	1.04568650853523	0.138144274376806	7.56952478307564	3.74591997002023e-14	2.55054857313555e-12
Recql4	116.324212593495	-1.48525795069669	0.196523430101117	-7.55766348029078	4.1037408629748e-14	2.78296257880291e-12
Ccdc42	21.352857686114	2.12777097057093	0.281994419187182	7.5454364547497	4.50775269771569e-14	3.04471648214509e-12
Dpy19l1	1760.84893660261	-0.973737702616975	0.12911381089089	-7.54170058104669	4.63881871985941e-14	3.12076067344804e-12
Nrn1	3521.21166392713	1.05998371718443	0.14076907982688	7.52994704865592	5.07609035361935e-14	3.40138340123874e-12
Kcnh5	88.3277045127135	-1.78343514198256	0.237966534237249	-7.49447878332551	6.65623333951533e-14	4.43645283568106e-12
Etv6	340.922434145927	-1.59946684186911	0.213428941321564	-7.49414222815859	6.67333305852772e-14	4.43645283568106e-12
Kcnj3	1215.62838696264	-1.05070557614524	0.140344112638008	-7.48663806693015	7.06602076635237e-14	4.67909124159318e-12
Antxr2	152.306404077549	-1.27561638997227	0.170416054650888	-7.4853064318704	7.13803914258696e-14	4.70831753756732e-12
Atp6v1c2	40.9931671684634	-2.31329580094403	0.309960611014346	-7.46319280173622	8.4450631247757e-14	5.54876793482344e-12
Kcnq5	2222.85887625702	-1.18441829145782	0.159838497374354	-7.41009400685132	1.26209920318457e-13	8.26039036626922e-12
Ryr3	1421.59953174991	-1.16981120690085	0.158126840346684	-7.39792943649609	1.38324315659715e-13	9.01831812443997e-12
Ephb1	218.765613643112	-1.32552007269727	0.179286703568993	-7.39329825531196	1.43230701650327e-13	9.30228318487473e-12
Dlg1	2732.32354687035	-0.765739079927394	0.103605059982197	-7.39094287536705	1.4579124885386e-13	9.43230278983249e-12
AF529169	527.615116650848	-1.42700651586404	0.193657135980892	-7.36872673777865	1.7226535131017e-13	1.10671966710233e-11
Dennd2c	258.356784704622	-1.35908179365131	0.184441227809216	-7.36864425483617	1.72371948624845e-13	1.10671966710233e-11
Rwdd2a	613.265190163583	0.887727907023882	0.120821863516465	7.34741114883486	2.02082538229056e-13	1.292562780506e-11
Adcy7	181.106086797782	1.38352274633871	0.188420753656987	7.34273013713428	2.09280234356896e-13	1.33354944805681e-11
Trpm3	432.830622855381	1.42830809821397	0.194932069964653	7.3272094144025	2.3499447524304e-13	1.49177319885488e-11
Myt1l	6303.81272844729	1.4879240132314	0.203295765621011	7.31901133644478	2.49804496763251e-13	1.57984971248849e-11
Cpxm2	45.8739716586966	1.44333332066755	0.197759857645912	7.29841403532883	2.91179447575078e-13	1.83352888083381e-11
Ism1	369.165977339067	-1.63987565935374	0.224702220242824	-7.29799490891372	2.92087687400387e-13	1.83352888083381e-11
Col6a3	92.5416042721763	1.56964420075188	0.215481856948679	7.28434506263661	3.23236715576609e-13	2.02154636267652e-11
Stag1	2864.64495758009	0.939931164671776	0.129109887850375	7.28008660158595	3.33605950110531e-13	2.07869744412045e-11
Tap1	351.376432927393	1.43519016045954	0.197368637040302	7.27162218871925	3.55195877253754e-13	2.20508734680401e-11
Nxph3	66.6661054130856	-1.85523307126908	0.255154023661945	-7.27103200115351	3.567514079494e-13	2.20663160242988e-11
Ccdc147	68.6329709188002	1.54428788063767	0.212462180363599	7.26853070035732	3.63418566408059e-13	2.23966639137463e-11
Fzd7	44.8219168133997	-1.50191462736897	0.206665005079188	-7.26738727146128	3.66506957359363e-13	2.25048599344371e-11
Rin1	107.764649104401	-1.36834589653554	0.1884553197617	-7.26085046718656	3.8466400631925e-13	2.35341898938654e-11
Elavl4	5161.18538411973	0.657720937336962	0.0906257714400101	7.25754856357103	3.94168489495601e-13	2.40286249589268e-11
Slc25a37	153.686451634477	-1.23145577955653	0.170305011843648	-7.23088396650997	4.79860225046051e-13	2.9147193381754e-11
Ift52	893.552592837284	0.579548491884914	0.0802352265143482	7.22311778831054	5.08089677290775e-13	3.07512626907958e-11
Gpr132	8.82710536115988	-2.96419797043142	0.41091513223547	-7.2136500651741	5.44716316397338e-13	3.28502847095909e-11
Arap2	1493.6449102777	-0.810588286597669	0.112389007869038	-7.21234489001104	5.49964617032072e-13	3.30487634277707e-11
Tmem200a	1109.34523411224	-0.895737339239655	0.124220609938115	-7.21085929046636	5.55998860712174e-13	3.32928963190985e-11
Gm11974	209.16449748048	-1.25728057823918	0.174524437593459	-7.2040374149087	5.84553148679563e-13	3.48790263908237e-11
Fam69a	892.103456723123	0.6268802672346	0.0873574677502487	7.17603524207941	7.17620633180488e-13	4.26591152326094e-11
Thsd4	108.72566937226	-1.59198743977233	0.22186174781206	-7.17558324259175	7.19995726714064e-13	4.26591152326094e-11
Grid2	185.229597975092	-1.2246925445933	0.170806999721104	-7.1700372150614	7.49773821231547e-13	4.42681144941115e-11
Fst	257.669962567562	-2.38180912161747	0.33249816833097	-7.16337516556363	7.87145428607722e-13	4.62137044965396e-11
Myo15	44.3904347683977	-2.21541749174228	0.309277984864065	-7.16319169214716	7.88200100379214e-13	4.62137044965396e-11
Fancd2	212.98477823082	1.18961863107097	0.166161011827885	7.15943299805621	8.1011427547662e-13	4.73342202619315e-11
Hip1	1617.89852353267	-0.889078504717986	0.124315030257669	-7.15181827068848	8.56358941338564e-13	4.98637140808379e-11
Cpne7	1269.85973503359	-0.765320707187882	0.10723941200303	-7.13656194950283	9.56941890977091e-13	5.55289373575229e-11
Adam33	8.15242184765992	-3.14592620032096	0.443014544828521	-7.10118039474001	1.2369578951506e-12	7.15317500599759e-11
Naf1	301.152650239137	-0.936582412208849	0.1319499544774	-7.09801239354927	1.26563837632172e-12	7.29405106572304e-11
Adra1a	188.223766502138	-1.27775359252186	0.180190528085565	-7.09112518897278	1.33025937252212e-12	7.64039447769e-11
Ostn	27.6717260144857	-2.78533595549586	0.394435489360298	-7.06157541760039	1.64625353074344e-12	9.42326682038433e-11
Has3	134.382717142224	-1.26875056321923	0.179779300638112	-7.05726720882719	1.69808902394234e-12	9.6871389386116e-11
Hs6st2	1737.51041352086	-1.04317330829173	0.14799805000495	-7.04856116858862	1.80777280245833e-12	1.0278131832428e-10
Ptprh	44.7553012777375	1.57734271455416	0.224288164787759	7.03266138026846	2.02630722761816e-12	1.14819543105907e-10
Itpka	477.61033503719	-1.83327077196126	0.261119461638757	-7.02081246819312	2.2058175812717e-12	1.24573363469411e-10
Sostdc1	113.429325544837	1.28110275074658	0.182961033297168	7.00205244613914	2.52239614749621e-12	1.41977271155403e-10
Gpm6a	116550.168218837	0.773726394104417	0.110522553820669	7.00061994006986	2.54832366952293e-12	1.42960111241077e-10
Rxfp1	33.5825848524413	-2.18548291043384	0.312374222164699	-6.99636127235092	2.62695631941774e-12	1.46662560817407e-10
Kcna4	1839.90022448234	-0.841972011675701	0.120348616297612	-6.99610878444645	2.63169228518739e-12	1.46662560817407e-10
Ppp2r1b	901.811362847263	1.04288702595066	0.149365511492222	6.98211398020729	2.90771064171261e-12	1.61511848341971e-10
Gm13749	16.9052585695668	2.46755038043898	0.353955579956056	6.97135606887546	3.13900363339124e-12	1.73787591322769e-10
Trim16	34.9151715359098	-1.87268298381747	0.269025459601624	-6.96098795478524	3.37894666501582e-12	1.86460435900186e-10
Unc5c	3507.11283535818	-1.16987370242613	0.168539011148872	-6.94126359500691	3.88608119718631e-12	2.13747124090189e-10
Mybl1	385.455259704965	-1.03483548512598	0.149392162526303	-6.92697305953904	4.29940418034917e-12	2.35713438277195e-10
Gatm	605.9561137675	-0.898897254282888	0.129817009066672	-6.92434112251984	4.38009302486022e-12	2.39360035009028e-10
9130019P16Rik	24.649267846611	1.87256678939852	0.270604185634368	6.91994761651127	4.51810682819497e-12	2.46105651293227e-10
Mapk4	1309.07941200108	-1.04312858855129	0.150951029417059	-6.91037744213891	4.83365881678248e-12	2.62447468746588e-10
Nnat	41227.9318307415	-1.02939921180359	0.14907618501612	-6.90518885824906	5.01366819452825e-12	2.713487215795e-10
Ly86	50.5088963205353	2.92781676757801	0.42445852287436	6.89776882733168	5.28256154859778e-12	2.84988288529144e-10
Vwc2l	129.954502165272	-1.13554834035317	0.165206669168485	-6.8735018148395	6.26447121089944e-12	3.36884907220535e-10
Cited2	758.615051785888	-1.08579330051548	0.158268542742939	-6.86044921939435	6.8644342231819e-12	3.67977258071903e-10
Dpp4	13.0928845832075	2.10932744891818	0.307782387032999	6.85330784926308	7.21615604386044e-12	3.85607629609581e-10
Col20a1	166.80015276961	-1.49585483268667	0.218592387537925	-6.8431240883315	7.74844766429564e-12	4.12745385676013e-10
Fam155a	1616.37798752008	0.817009072761916	0.119503226137113	6.83671143592819	8.10317296547606e-12	4.30283580801977e-10
Mpped2	1562.4110523762	0.9628700939704	0.140854183697617	6.8359353530987	8.14716797063755e-12	4.3126356850215e-10
Neurod1	635.463244989381	0.930664161834058	0.13621156253026	6.83249016857367	8.34531271652894e-12	4.40371720410337e-10
Dnah6	298.838793695527	0.977106055582536	0.14316818219445	6.82488274004513	8.79971625571385e-12	4.6290345387534e-10
Itm2b	9416.26920296528	0.479732840057772	0.0703298374523388	6.82118511055678	9.02925037287098e-12	4.73502862721427e-10
A930003O13Rik	15.8153786785279	-2.25188947254436	0.330381465551156	-6.81602846209203	9.35917616618024e-12	4.89284980625757e-10
Prmt2	3143.14861108827	0.507227614094853	0.074460801431584	6.81200852452418	9.62454023070319e-12	5.01604896097698e-10
Pcdha11	117.524212991173	-1.38035727742434	0.202749357898479	-6.80819555599041	9.88304661239342e-12	5.1349269260577e-10
Zfp521	146.465859045008	-0.931372442566245	0.136819027398744	-6.80733126286495	9.94258174207627e-12	5.15001335265951e-10
Stc2	254.45309685707	-1.459003861068	0.214788738266645	-6.79273910188322	1.10024250261194e-11	5.67875824496178e-10
Inpp4b	402.779777985957	-0.920008943448565	0.135447416201621	-6.79236983065871	1.10306330945604e-11	5.67875824496178e-10
Onecut2	147.6872635044	-1.65900452087968	0.244385516126906	-6.78847317620159	1.13326444322777e-11	5.81343351570082e-10
Cd81	5759.07554414789	0.436400891229964	0.0642889990185295	6.78811146373866	1.13610864632315e-11	5.81343351570082e-10
Zfp599	74.1613529994719	-1.60405247352814	0.236426342097403	-6.78457594571803	1.1642797715591e-11	5.93958556572416e-10
Plcxd3	727.884576596131	-1.17996651257281	0.174190896345269	-6.77398496322084	1.2528269920653e-11	6.36095324169336e-10
Themis	36.0595801129695	1.87620356238658	0.276979379219051	6.77380232303422	1.25441041660778e-11	6.36095324169336e-10
Htr4	73.382765586091	-1.60296487892622	0.236888887941297	-6.76673732084659	1.31718903301725e-11	6.65929760824232e-10
Cd52	66.9013913059504	2.10865412625376	0.311791025817977	6.76303662275639	1.35129061644333e-11	6.81131144754091e-10
Stx16	1200.09885159462	0.832691133080654	0.123135981139706	6.762370554679	1.35751953161203e-11	6.82234369369068e-10
Efna5	257.773178808797	-1.18446440661126	0.175329047200769	-6.7556655643884	1.42181041737346e-11	7.12424056610336e-10
AU022754	39.1572452076004	-1.55983049252262	0.230926188543931	-6.75467127551834	1.43159461715137e-11	7.15204340391068e-10
Tmem74	1378.34199934992	-1.12522478396593	0.166708684839898	-6.7496470567599	1.48205229078448e-11	7.38228170565981e-10
Osbpl2	2283.59071434594	0.451089647407546	0.0671404859776359	6.71859371941099	1.83486714704387e-11	9.1128137191126e-10
Dab1	3261.81841489058	-0.932673201436892	0.138929765328043	-6.71327126505	1.90308843461857e-11	9.42391533928714e-10
Tbr1	621.441265535353	1.17820624419941	0.175653959656657	6.70754161478856	1.97930524859463e-11	9.77267497887982e-10
4921506M07Rik	10.0166099212308	-2.27725467462577	0.340122503052177	-6.69539549482978	2.15089113647568e-11	1.05889060438858e-09
Siglec1	7.62566134496363	-2.97032747662141	0.443737882867796	-6.69387850643882	2.17331876543274e-11	1.06249679972795e-09
Lifr	1789.69542285026	0.980350925371927	0.146457061368094	6.6937771126514	2.17482593865692e-11	1.06249679972795e-09
Abca12	24.90786813279	1.99246448851115	0.297665998007356	6.69362473997419	2.17709281479255e-11	1.06249679972795e-09
Brinp3	274.246961267082	-1.46435070728051	0.218795562194879	-6.69278066058868	2.18969230113732e-11	1.06556611518746e-09
Cbfb	1724.93397826906	0.740565487654979	0.110814070989521	6.68295534170031	2.34170954569641e-11	1.13626745369625e-09
Scml4	214.499715369511	1.39663953901677	0.209321396956934	6.67222538794787	2.51953215492253e-11	1.21904928275134e-09
Fam160a1	51.8163104590043	-1.57116121871661	0.235831579852849	-6.66221724714293	2.697269132027e-11	1.30131675895451e-09
Tcfl5	259.823084313644	0.856136971123166	0.128548180374937	6.66004737388013	2.73739335079576e-11	1.31691236813497e-09
Cemip	914.983087829743	-1.08951035713713	0.164152004473362	-6.63720410014204	3.19688852563809e-11	1.53359828533877e-09
Rprm	227.541250641479	-1.22484298130523	0.18492453359134	-6.62347476301863	3.50851850207145e-11	1.67832417637333e-09
Abca4	15.5366267391604	-1.86315674644827	0.281443268329903	-6.62000820806385	3.59178924532035e-11	1.71330376261241e-09
Trip10	94.5383966978066	-1.64956819441012	0.249598960174607	-6.60887446508657	3.87252918946116e-11	1.84201487023215e-09
Fbn2	417.329520659249	-1.1212294637171	0.169902923011633	-6.5992358685926	4.13282346013812e-11	1.96030497044641e-09
Sema3a	2073.85546014935	-1.32016454451209	0.200373798717557	-6.58850884178208	4.44265800779627e-11	2.10136479326744e-09
Rad51d	393.699690030459	0.767942626988381	0.116665636681409	6.58242348675028	4.62841007503746e-11	2.18310984712521e-09
Grin2a	1238.5916846789	-0.958319370232032	0.145761008367505	-6.57459344556563	4.87862834493718e-11	2.29472195634009e-09
Cdh10	1380.85566671824	-1.02825925749817	0.156424054169913	-6.57353667858037	4.91339626582343e-11	2.29877624789576e-09
Prex1	555.448282012412	-1.34822174002708	0.205099401719184	-6.57350401184022	4.91447486373545e-11	2.29877624789576e-09
Prss12	952.527745517347	1.06484166720008	0.16200705524957	6.57281045914764	4.93742948855695e-11	2.30313354540808e-09
Arhgef26	1137.30434250448	-0.937662544296938	0.142709041244337	-6.57044946922131	5.01636058435882e-11	2.33350591811248e-09
Trabd2b	9.73564797996137	-3.06079494622806	0.466805692715148	-6.55689292995791	5.49404300157155e-11	2.54869258583893e-09
Cyp11a1	63.1007885506523	1.45972069202152	0.222697613666733	6.55472085213264	5.57460565286626e-11	2.57220456329907e-09
Stac	148.286607049247	-1.42063314004799	0.216734865174439	-6.55470516432414	5.57519169825572e-11	2.57220456329907e-09
Zfp608	1213.83120113215	0.820826187229615	0.125360973164763	6.54770114260997	5.84294967101685e-11	2.68839368241936e-09
Fhod3	1403.82066578359	-0.600340443861358	0.0918259877550243	-6.53780545724116	6.24280536448196e-11	2.86456552675658e-09
Dnah7b	86.8724696576944	1.37541753755494	0.210531348759286	6.53307711968134	6.44319442564431e-11	2.94850355207127e-09
Arhgap25	10.3556111008744	2.4549007801637	0.376369806639458	6.52257629825062	6.91098867625406e-11	3.15402580506016e-09
B020018J22Rik	11.2668922564806	-2.31183815098571	0.354895704743799	-6.5141339274721	7.31102460157935e-11	3.32760003833609e-09
Glt28d2	11.1357694908294	-2.81844909998519	0.432699679051662	-6.5136380645401	7.33521205325931e-11	3.32963415944453e-09
Ahrr	22.4877988407437	-1.56556198351085	0.240544838161636	-6.5083998288039	7.59555320233478e-11	3.43856598859585e-09
Dnajc6	13290.3385595684	0.638559928255573	0.0982990323694832	6.49609576883091	8.24311945488264e-11	3.72174639345316e-09
Tshz3	437.215740636248	-1.45621731837492	0.224342317292283	-6.49105053362578	8.52398792166586e-11	3.83829493453999e-09
Mef2b	11.5306840947865	-2.00419275148141	0.308893676495483	-6.48829323481058	8.68141913511094e-11	3.89878839136924e-09
Atp1b1	21117.5111759821	-0.562602278962894	0.0867665616733738	-6.48409096906212	8.92683513803842e-11	3.99836971196065e-09
Rapgef6	1886.43108491549	0.94903500996308	0.146403250884576	6.48233563277429	9.03134516735071e-11	4.0344786903673e-09
Trdn	13.7326776377632	2.01601345825652	0.311043710988803	6.48144742051732	9.08468282480175e-11	4.04759773560956e-09
Snhg1	1091.95302932088	-0.892459492395337	0.13770382849301	-6.48100711623019	9.11123740699101e-11	4.04874618038027e-09
Insm1	82.8288855433691	1.32280191198053	0.204175881718561	6.47873735549187	9.24933433239857e-11	4.0993243972935e-09
Parva	1398.46797997364	0.881942538521377	0.136313994573941	6.46993392921945	9.80457784813384e-11	4.33403407182168e-09
Pkia	38124.9678590311	0.678797471125903	0.104955392846739	6.46748540227103	9.96471635387233e-11	4.3933211580023e-09
Iqcf5	39.1782232782876	1.42869146577463	0.22111146421044	6.46140837100556	1.0373296036602e-10	4.56154887692867e-09
Hcn1	1569.85025034754	-0.980268156683554	0.151790562458217	-6.45803099223239	1.06074022094393e-10	4.65237905736604e-09
Cd72	21.3276922142071	2.56283175522971	0.397040474480816	6.45483752904778	1.0833506474629e-10	4.73923809146592e-09
Gbe1	398.533491115663	-0.869540812342285	0.134845284169479	-6.44843323737901	1.13012325769076e-10	4.9190553550027e-09
Trhr	77.0404803133794	-1.92709359641792	0.298847777677138	-6.44841200224641	1.13028158103817e-10	4.9190553550027e-09
Trpc4	734.57606978152	-0.997906472388979	0.154781125275505	-6.44721034695115	1.13927620953822e-10	4.94545451780522e-09
Aldh8a1	13.6027147227874	-2.07843568545013	0.322592527041684	-6.44291330772695	1.17201648612146e-10	5.07453086785818e-09
Lingo2	719.789847411926	-1.36757773283809	0.213151427444213	-6.41599143499057	1.39909312782001e-10	6.04222162566976e-09
Sema3d	126.757193788136	-1.39628828903248	0.217859327856293	-6.40912786600314	1.46354412870724e-10	6.30444034626285e-09
Ntng1	82.5631374973422	-1.52905631189847	0.239268088461487	-6.39055680901881	1.65282784325079e-10	7.10169235652233e-09
Npas2	172.362613320104	-1.08341943446718	0.169613887845018	-6.38756323690394	1.68549916946153e-10	7.22369009531151e-09
Itgbl1	358.869281479376	1.39165100382802	0.218249509479954	6.37642213787352	1.81272842218303e-10	7.74929927518546e-09
Enpp5	6619.81397167567	0.535876373905779	0.0840549781361464	6.37530799232145	1.82595623644975e-10	7.78613560825517e-09
Dnah7a	93.841998378825	-1.37084060804469	0.21529312416408	-6.36732182398885	1.92357298185505e-10	8.18172629007668e-09
Cadps2	1357.01305143211	-1.42112724908293	0.223206247833204	-6.36687934535281	1.92912805658853e-10	8.1847377797874e-09
Leprel1	17.5772523718703	-1.77014127008391	0.278412005140124	-6.35799188757325	2.04408263345295e-10	8.65072164122469e-09
Scrn1	5843.52037195259	0.586292947553491	0.092220478199767	6.35751363469911	2.05045476608166e-10	8.65599479501374e-09
Polh	431.067601193764	-0.72606607903275	0.114423977375169	-6.34540151188901	2.21846085547968e-10	9.34187780689022e-09
Pvrl3	2810.19176011052	-0.912038461629197	0.143988344747098	-6.33411310638446	2.38710358120257e-10	1.00270226547728e-08
Rbfox1	4002.83061448861	0.842334840625212	0.133066912377242	6.33015995920317	2.44907172947931e-10	1.02617928595503e-08
Bche	64.7396472958752	-1.63654143169198	0.258720769226028	-6.32551239155539	2.52393649647101e-10	1.0549304871141e-08
Igfbpl1	74.2012655654974	1.42599278514222	0.225656788736879	6.319299291301	2.62751962424415e-10	1.09551349074041e-08
Epha6	389.983647701398	-1.16797165402506	0.185277742807662	-6.30389617406737	2.90254968477489e-10	1.20720329992879e-08
Cd5l	8.43140266304164	2.61460026004995	0.415150987547387	6.29795023612105	3.01607300242027e-10	1.25133682355943e-08
Grap	9.02946122286548	2.47563773632687	0.393158033134538	6.29680059336272	3.03851747555218e-10	1.25755897284741e-08
Arhgef3	378.187709189103	-0.714887224561006	0.113626596656019	-6.29154833111108	3.14314919723112e-10	1.2976825756588e-08
Tmem150c	1786.09846013774	0.951845008584523	0.151384203664621	6.28761116115691	3.22388159627156e-10	1.32776743011321e-08
Ghsr	108.187784432227	1.4439086231698	0.229689619381517	6.28634688436421	3.25023268995465e-10	1.33536324093854e-08
Cntn3	188.60207832714	-0.976401617493184	0.155364806975072	-6.28457394247492	3.28754034622364e-10	1.34741277394011e-08
Fam214a	1136.79219416306	0.697234647371921	0.111112492546549	6.2750338093606	3.49558326733899e-10	1.42691309572863e-08
Tmem255a	221.743520994817	-1.31331390745425	0.209296124672529	-6.27490790624575	3.49841301451885e-10	1.42691309572863e-08
Man2a1	403.180766835321	-0.796172432779948	0.12699150532657	-6.26949362268383	3.62224129337498e-10	1.47385943325132e-08
Ap1s3	148.091578685647	-0.921470606367637	0.147083411075082	-6.26495265259557	3.72938705884861e-10	1.51380841047398e-08
Tigd3	114.012133915343	1.02191416033912	0.163135716831664	6.26419634023868	3.74753056775232e-10	1.5175252078433e-08
Hck	44.5408192214351	1.98265528538347	0.31672202981426	6.25992226226319	3.8516942696305e-10	1.55597390997561e-08
Uchl1	26932.0116465836	0.5347714978943	0.0854869066890483	6.25559537251111	3.96002248158029e-10	1.59591741345978e-08
Gabra1	3226.83722727753	-0.890579278086985	0.142408763382305	-6.2536831086453	4.0088403880229e-10	1.61174473314654e-08
Ypel1	3351.33434184698	1.06929716496944	0.171161100966891	6.24731413229388	4.17570723563119e-10	1.67173869407616e-08
Cntn2	1107.68261512703	1.05071475724392	0.168188807298007	6.24723353547658	4.17786171325441e-10	1.67173869407616e-08
Pcdhb22	311.812004219823	-1.02788314832062	0.164590532306096	-6.24509280041106	4.23548570096996e-10	1.69078987107751e-08
Adap2	9.67605088268358	2.24106425781798	0.358924859056965	6.24382569573511	4.26995816921773e-10	1.69831715100605e-08
Idnk	556.093219029971	0.859548562906627	0.137667396223998	6.2436610735926	4.27445688249184e-10	1.69831715100605e-08
Dusp1	3450.51433233378	-0.869383623553575	0.139412641628648	-6.2360458377178	4.48769652754019e-10	1.77885548272403e-08
Hey2	57.6653184976086	-1.4026514634866	0.225089194584075	-6.23153619647734	4.61883240772513e-10	1.82654810390741e-08
Arc	2952.43070453811	-1.29547007079153	0.208230507282345	-6.22132696932331	4.92967616559676e-10	1.94491849841745e-08
Sec14l3	428.181139119665	0.960022238906028	0.154381844595823	6.21849182732205	5.01956086778911e-10	1.97576468096706e-08
Krt6a	41.3256180396586	-2.36592710816857	0.380552753285935	-6.21708051706273	5.06489901573393e-10	1.98897406464379e-08
Crabp2	9.63002576694838	-2.09208157353616	0.336980681680075	-6.20831307927129	5.3556374022467e-10	2.09826666297767e-08
Slc1a2	11239.3950551083	0.724117374551109	0.11671772247573	6.20400534890218	5.50439136107002e-10	2.15155445655158e-08
Pde10a	4602.73089882655	0.802127472736616	0.129546648597919	6.19180412166602	5.94794406308314e-10	2.31956081868873e-08
Fam174b	2097.56658221096	0.784593856502232	0.126805854308244	6.18736304236405	6.11789592176914e-10	2.38034079573718e-08
Sorcs2	878.735667793971	-0.980814294558407	0.1586087834513	-6.18385863138253	6.25533907313932e-10	2.4250007805459e-08
Abtb2	124.901597501691	-1.18290925689596	0.191294556862937	-6.18370577968677	6.26140199169734e-10	2.4250007805459e-08
Hecw2	2486.19354528565	-0.651757923303593	0.1055372411719	-6.17562024614612	6.590422433213e-10	2.54658748757974e-08
B630005N14Rik	3804.32116214194	-0.700517459242639	0.113573404503586	-6.16797094623084	6.91718496082299e-10	2.66674852165427e-08
Slc40a1	186.416232745006	-1.44990164084336	0.23521172511306	-6.16424049501118	7.08222372180402e-10	2.72415557554403e-08
Nlgn1	3878.36768825284	-0.749761085656157	0.121712938977095	-6.1600770793749	7.27095451496299e-10	2.7903940440833e-08
Ppp1r2-ps9	5.92511211690493	-8.34481767940183	1.3560643892784	-6.15370313193046	7.56943159234164e-10	2.89835423737598e-08
6530402F18Rik	783.365083783063	-1.01939722822565	0.165787797298736	-6.14880735998185	7.80677255808263e-10	2.98246971528922e-08
Bend6	6890.95677719197	0.578301870488761	0.0940696439275941	6.1475928508232	7.86676505970919e-10	2.99860484871895e-08
Eepd1	408.597330849595	-1.05477014745349	0.171593347067723	-6.14691749696571	7.90031948304407e-10	3.00461249528563e-08
Tusc3	10935.1501249411	0.515540209901079	0.083906461386689	6.1442253836111	8.03546782918245e-10	3.0491440396309e-08
Inhba	117.051826895136	-1.60187259466216	0.261225102223981	-6.13215414990504	8.66970355112873e-10	3.28243529516502e-08
Katnal2	126.754279944362	0.980159591373413	0.159865362276227	6.13115672724541	8.7242406519017e-10	3.29569413082801e-08
A730018C14Rik	6.04877082876573	-2.79618329228961	0.456783349234774	-6.12146501612617	9.27188774862924e-10	3.49475661882485e-08
Rasa3	1814.19285894615	-0.774308216118315	0.126522305332941	-6.11993445804467	9.36138544881148e-10	3.52063150754189e-08
Rspo3	958.7990618972	1.01966608644316	0.166792097911175	6.11339565370884	9.75331537718584e-10	3.65987741020356e-08
Cmbl	55.9709734350355	-1.29260022075186	0.211621350215469	-6.10808039659403	1.00836559418008e-09	3.77544599186802e-08
Rassf5	192.580936680044	0.917975413910406	0.150301329376064	6.10756683072025	1.01161458119993e-09	3.77923093321726e-08
Grem1	23.463345817597	-1.6001212209555	0.262023673757468	-6.106781108781	1.01660508144172e-09	3.78949081793043e-08
C1qtnf7	9.14393894023023	2.43089469946058	0.39841723314095	6.10137940142912	1.0515696690563e-09	3.91119062371909e-08
4833424O15Rik	2569.12031729637	-0.622747452233618	0.102086234564224	-6.10020983624232	1.05929311864818e-09	3.93125793439409e-08
9430020K01Rik	1587.73087717619	-0.847144207224199	0.139091018251391	-6.09057448765731	1.12506221126332e-09	4.1661843200422e-08
Gabrg3	330.000771143364	-0.74239500030441	0.121907799313508	-6.08980725175103	1.13046708991655e-09	4.17703879219492e-08
Hs6st3	275.646916889261	-1.28741595536262	0.211511668804252	-6.08673725965486	1.1523484274291e-09	4.24859291387944e-08
Col12a1	181.609538005331	-1.38438831122068	0.227485399565673	-6.08561390693127	1.16045785660902e-09	4.26917023239649e-08
Dusp15	446.375703893393	0.753574507662643	0.123850700573258	6.0845397254487	1.16826434510991e-09	4.28854602859259e-08
Mettl7a1	214.519878333926	0.737462577522635	0.121605826071209	6.06436879998495	1.32472865370888e-09	4.85235749382391e-08
Tmem169	1300.15397816058	0.475065587569132	0.0783682502605334	6.06196496654943	1.34468508566744e-09	4.91479488237669e-08
Kndc1	1483.77224596438	0.970621721183825	0.160141804445928	6.06101401531013	1.35266043870612e-09	4.93326655896146e-08
Pcdhb17	672.504910703287	-0.98912258128562	0.163359672823182	-6.05487611594467	1.40525769059743e-09	5.10475217231856e-08
Txnrd3	295.575964166282	0.777604102616299	0.128427235102852	6.05482242137776	1.40572649539745e-09	5.10475217231856e-08
2610001J05Rik	770.122775514228	-0.923809726319427	0.15263676020797	-6.05234102886305	1.42755851493903e-09	5.17290838696575e-08
Nr4a1	2079.32737996985	-1.23060822967054	0.203420652228879	-6.04957370938874	1.45229606809176e-09	5.25127867361829e-08
Spry1	204.846795576973	-1.10386575615392	0.18253806753345	-6.04731808038693	1.4727681485026e-09	5.31392370846473e-08
Slc3a2	4439.57391574658	-0.694736649406121	0.114921400833637	-6.04532005672156	1.4911369156413e-09	5.36872877559039e-08
Rab36	409.754231794885	0.825143611779095	0.13659429167916	6.04083524747314	1.53318469014584e-09	5.50837376123461e-08
9430008C03Rik	341.581169034427	-0.880542364758234	0.145933393319154	-6.03386479770603	1.60084016995103e-09	5.73923293201551e-08
Zkscan16	364.980859427936	0.890766298944565	0.147691999345517	6.0312427409197	1.62703576256342e-09	5.81680592770657e-08
Gucy1b3	5645.12652437581	-0.729717527314953	0.120994221449805	-6.03101138691721	1.62936705188038e-09	5.81680592770657e-08
Nkrf	2072.96947449199	0.568522614028178	0.0944696887820196	6.01804262677305	1.76538711305978e-09	6.28909847914081e-08
Spr	399.317378705389	0.758298879027697	0.126015360563569	6.01751148142907	1.77118756006295e-09	6.29647855562588e-08
Dgkd	6808.76015822006	-0.482037808036144	0.0801492003810102	-6.01425598439723	1.80714753247123e-09	6.41081790615739e-08
1700101E01Rik	21.1445493060953	1.72021348750336	0.286068341519186	6.01329555856495	1.81789153616965e-09	6.43541225990792e-08
Tfap2d	26.5943658579197	1.74713827017704	0.290866660123793	6.00666391065053	1.893795124546e-09	6.69008880190037e-08
Zfp804a	749.921431667336	-0.923174001782833	0.153859284895041	-6.00011889053428	1.97173107533398e-09	6.9508665841523e-08
Wfdc3	14.9099174324732	-1.78504935947683	0.297620534204581	-5.99773588958687	2.0008759316858e-09	7.03891478800966e-08
Kcnab1	183.468074173506	-1.14685753411994	0.191231596320203	-5.99721780390107	2.00726760422903e-09	7.04189115906355e-08
Nipa1	1537.87689656646	0.432822075764358	0.0721731982885105	5.99699176464597	2.01006250069207e-09	7.04189115906355e-08
Slc6a8	1969.58174238214	-0.60847185602881	0.101483445287813	-5.99577452561993	2.02517854068838e-09	7.08015835156603e-08
Sstr2	666.934016263799	-0.672732020768489	0.112304061897789	-5.9902732759636	2.09488730490990e-09	7.29996753222116e-08
Baz1a	412.972945896103	-1.32014921499225	0.220387304593416	-5.99013276843573	2.09669800611587e-09	7.29996753222116e-08
Myoc	10.6288559899145	-2.15207691099826	0.359555773222847	-5.98537715500519	2.15889012474235e-09	7.50103264329204e-08
Gria3	1311.58275565076	-1.00171047770895	0.167446525681133	-5.98227089892865	2.20047895599701e-09	7.62983319321674e-08
Brinp2	2562.01229842275	-0.626527057950151	0.104810372496472	-5.97771998159094	2.26282252810801e-09	7.82992237902292e-08
Piwil2	28.1951145021648	-1.7027521131556	0.284990016005665	-5.97477812388258	2.30403545176244e-09	7.95622548843774e-08
Rac2	81.5644294974146	2.14534474752827	0.359814714559046	5.96235968325364	2.48621124052407e-09	8.56778836887541e-08
Dpyd	113.518620678459	1.15852171576385	0.194329628246141	5.96163192519698	2.4973117569941e-09	8.58851452721026e-08
Gmnc	10.3910456595434	-2.0222417551887	0.339231899117184	-5.96123701942939	2.5033554552541e-09	8.59180085719935e-08
Fam196a	553.401966136624	-0.84329054546902	0.14151069666206	-5.95920001357122	2.53475706269962e-09	8.6819285518754e-08
Galnt18	549.971291158863	-0.98214615681045	0.164860765353772	-5.95742810427259	2.56238378352962e-09	8.75878796936867e-08
Zim1	270.48151314546	-0.951110507894196	0.159674263632957	-5.95656736567463	2.57590959902256e-09	8.78723424022121e-08
Smyd3	867.772867943524	0.695634746630028	0.116812900647361	5.95511919295658	2.59882353950362e-09	8.84752707420525e-08
Rasgrp1	347.178979077033	-1.88912489383609	0.317250485763542	-5.95467927902283	2.60582337137555e-09	8.85350773622685e-08
Nrip3	5466.40668954815	0.739680123469114	0.124352830725685	5.94823711814656	2.71045759481715e-09	9.19051946708482e-08
Fjx1	914.024537415567	-0.940128797542889	0.158102269091748	-5.94633336348465	2.74215411434598e-09	9.27936159816557e-08
Scube3	45.5262851368488	1.45054580441325	0.243976891884748	5.94542291775107	2.75743986794028e-09	9.31242592200792e-08
D430019H16Rik	10460.7754383999	0.852248394491787	0.143375144970548	5.94418505848313	2.77835583704245e-09	9.3643346635327e-08
Sfrp1	1229.25174052418	-0.942411969069992	0.158584623062429	-5.94264406517521	2.80460979526864e-09	9.43399223165463e-08
Cd53	32.5176265700303	1.92770572563831	0.325053743684441	5.9304215474894	3.02157927569415e-09	1.01436158348651e-07
Gm13446	11.7833489646172	1.84073226301574	0.310409730440713	5.93000825200392	3.02919456417049e-09	1.01490038513061e-07
Cirbp	1791.13322748721	0.654900062435088	0.1104837585171	5.92756864198938	3.07452845637303e-09	1.02804925770921e-07
Exph5	71.8638491966569	-1.4059142775977	0.237221061261644	-5.92659972989094	3.0927158911876e-09	1.03208696716588e-07
Syndig1l	108.378562351436	1.06768793714042	0.180183979376572	5.92554310785324	3.11266913851461e-09	1.03669686534433e-07
Grp	415.319134842984	1.84411934278756	0.311331255685825	5.92333506228019	3.15477133629539e-09	1.04865096032842e-07
Lancl2	7579.0159308372	0.515157032598417	0.0870028195542496	5.9211533055799	3.19691665153298e-09	1.06057238856161e-07
Trim17	109.082180117574	-1.02873589170201	0.17395776907938	-5.9137105353	3.34485503486785e-09	1.10747494350546e-07
Crtac1	635.962375132551	-0.905410563422681	0.153152684312995	-5.91181648225185	3.38355398255714e-09	1.11737331921959e-07
Syt13	1897.04462154272	0.810853245321867	0.137163054540019	5.91160096310985	3.38798495463954e-09	1.11737331921959e-07
Wscd1	2385.67433680522	-0.853906203775573	0.144643151182804	-5.90353706202366	3.55789649598182e-09	1.17112359125047e-07
Tmtc2	369.229649704653	-0.923752382162039	0.156824792369292	-5.89034659766538	3.85386469531028e-09	1.26607702811302e-07
Lrrc75b	372.545223208128	1.13240037170828	0.192704439227425	5.87635851176134	4.19389536940414e-09	1.37510907199531e-07
Kif18a	474.628521045462	-1.07454200179739	0.18307560578904	-5.86938930048168	4.37403285356725e-09	1.43139377452203e-07
Dusp4	882.07097348324	-1.18499140512123	0.201937749943896	-5.86810244964328	4.40810859519693e-09	1.43975477250475e-07
Epha7	1167.97460059909	-0.953959520336509	0.16262269815094	-5.86609084207347	4.46189403430999e-09	1.45450854562468e-07
Yes1	762.473660674406	-0.742360054095661	0.12660429263452	-5.86362467375966	4.52870520840333e-09	1.4734434710809e-07
Nabp1	415.360892833366	-0.929475648265658	0.158534065652931	-5.86293957981563	4.54743728129037e-09	1.4766928063821e-07
Apaf1	2229.61523232156	0.582014604395111	0.0993151408448468	5.86028071293129	4.62085370047407e-09	1.49765327420739e-07
Usp43	62.4605571664922	-1.01479727443851	0.17336376226726	-5.85357205662211	4.81125658586863e-09	1.55637698676202e-07
Bcl2a1b	14.3233188770102	2.61038952732392	0.445983767864258	5.85310434015264	4.8248121588648e-09	1.5577777842178e-07
BC021891	150.154033495915	0.748510808768922	0.128101363866783	5.84311350148718	5.12340834904817e-09	1.65102811797762e-07
Tprgl	2326.52400872496	0.387817092971427	0.0663894283588243	5.84154891160288	5.17176891048347e-09	1.6634379013795e-07
Gabrr2	19.3560623860994	-1.63334718033774	0.279629436721507	-5.84111315134696	5.18531689210071e-09	1.664624734601e-07
Lrrtm4	849.632589167013	-0.92208774079574	0.157934022269963	-5.8384363770561	5.26929970466127e-09	1.6883756131482e-07
Syt4	45438.5433352785	-0.846323601198477	0.145019522464128	-5.83592875509449	5.34917510087569e-09	1.70900739691288e-07
Nyap2	885.5190636429	0.97874912899289	0.16771520385907	5.83578057607302	5.3539317361537e-09	1.70900739691288e-07
2700099C18Rik	71.3078579818759	-1.20852258459896	0.20714578199185	-5.83416458195857	5.40607400380994e-09	1.72239557789311e-07
Tyrobp	38.0011649617616	2.0024891509811	0.34342134881291	5.83099786283822	5.50968904422432e-09	1.75210186818779e-07
Cabp7	25.415074196717	-1.58343046133068	0.271982115843118	-5.82181830750967	5.82108128295478e-09	1.8476462132326e-07
Tnfrsf11a	69.2121066943113	-1.12601293857938	0.1934314040688	-5.82125195234008	5.84084416234697e-09	1.85044079784974e-07
Fxyd7	582.08343387153	1.13176452809202	0.194473265292006	5.81964069144746	5.89742652842984e-09	1.86486787189263e-07
P2ry4	6.34519860103894	-2.54057570838133	0.436668610760317	-5.8180864064347	5.95251315266138e-09	1.87876891767925e-07
Crb1	183.199852765459	1.02526349387009	0.176259202769122	5.81679411776902	5.99869496156645e-09	1.88981274479498e-07
Mc4r	71.0065454887654	-2.00129290836203	0.344134050772602	-5.81544576559339	6.04725177965691e-09	1.90156226352489e-07
1500009C09Rik	1937.95584570693	0.594188704370216	0.102291570504062	5.80877487208607	6.29316430783379e-09	1.97521138479705e-07
Zbtb18	19857.2215016204	0.856749191538664	0.147673546045342	5.80164297859823	6.56682670463676e-09	2.05553141997092e-07
Ppp1r18	257.506505685793	0.97877579334217	0.168711546340685	5.80147485202757	6.573415650742e-09	2.05553141997092e-07
Zfhx2	88.7277374904695	-1.05447914572423	0.181800132416534	-5.80021109835192	6.62314888691353e-09	2.06725493723516e-07
Slc6a15	3651.02578376765	0.521811147021334	0.0899692648047846	5.79988230595816	6.63614792041089e-09	2.06749066022248e-07
Pam	14641.8003643893	-0.724625373465695	0.125033078854516	-5.79546932783159	6.81303795786552e-09	2.11869169349019e-07
Gm9962	56.5749327677017	-1.1412080657388	0.196935267041607	-5.7948384912576	6.83869613100287e-09	2.12276144978152e-07
Chodl	219.331852600053	-0.994657867364538	0.171786625997957	-5.79007743813752	7.03539804985394e-09	2.17981158660245e-07
Gm16532	315.155782499531	0.636829701530948	0.109992806387832	5.78973955156215	7.04956496651847e-09	2.18020062316174e-07
Tlr7	27.4662698435033	1.90371032580268	0.328934011559684	5.78751439164345	7.14355689105014e-09	2.20523037773807e-07
Fblim1	95.1912818611711	1.18988399582322	0.205656664852912	5.78577891785922	7.21770905548848e-09	2.22405538523683e-07
Hap1	3213.08218141159	0.973748980275479	0.168326625922962	5.78487791183513	7.25650127945868e-09	2.23122470660395e-07
Sertm1	2095.35236593408	-0.605527146009182	0.104678710827898	-5.7846255577672	7.26740251469958e-09	2.23122470660395e-07
Trpm8	76.0541157915418	1.16854178888375	0.202020767861839	5.78426565373175	7.28297726956054e-09	2.2319483516116e-07
Hpx	15.1842880630933	-1.86324331493304	0.322433049761127	-5.778698295083	7.52807822329983e-09	2.3028827695406e-07
Psph	809.316811748297	-0.892294972343351	0.15457271623519	-5.77265505890237	7.80320798436993e-09	2.38273001851846e-07
Cdc42ep2	368.265747176978	0.697089600423309	0.120907910718455	5.76545898677007	8.14359049274077e-09	2.48217814188485e-07
Uhrf1bp1l	3134.46512316504	-0.475502829693211	0.0825314289363572	-5.761475789543	8.33816252406807e-09	2.53690472759303e-07
Tmem163	226.491830314958	-1.15958670139982	0.201300058949494	-5.76048863299516	8.38707786802617e-09	2.54719778560234e-07
Piga	156.356108014373	-0.89746798609328	0.155843970295302	-5.75875976717424	8.47341921810247e-09	2.56514360103391e-07
Loxhd1	6.80673290579812	-2.75506050852053	0.478432982155591	-5.75850873848107	8.48602748004598e-09	2.56514360103391e-07
Clec12a	25.6622652990275	2.2314190634327	0.387525500231969	5.75812188384247	8.50549350831237e-09	2.56514360103391e-07
Far2	312.664704147521	-0.903142542290638	0.156862517793717	-5.75754205015579	8.53475131668479e-09	2.56514360103391e-07
Pcdh9	9423.83050955946	-0.925716146196121	0.160783807102651	-5.75752100213116	8.53581521655811e-09	2.56514360103391e-07
Skil	4335.46904179326	0.74373950133872	0.129177701436052	5.75749137096159	8.53731318122147e-09	2.56514360103391e-07
Calb2	1048.08347331237	-1.29912963232036	0.225694496228474	-5.75614228095858	8.60578602539245e-09	2.58112438409906e-07
Aif1	45.3835977165432	1.59412049377042	0.27696347013437	5.75570667495257	8.62800894875996e-09	2.58254107092476e-07
Shmt2	559.475273273899	-1.07336820435201	0.186495945035498	-5.75545063002683	8.64109738879834e-09	2.58254107092476e-07
Sh3bgr	15.3471538057884	-1.65168387685804	0.287233335153195	-5.75032099243328	8.90741699292226e-09	2.65743186117465e-07
Spag4	114.446318835261	-0.976632499508581	0.170017717520949	-5.74429838106868	9.23029014335465e-09	2.7465959262876e-07
Plk2	9465.34085412516	-0.981917054964313	0.170942332518748	-5.74414213551591	9.23881609695225e-09	2.7465959262876e-07
Fstl5	2453.96033707191	-0.949670491076151	0.165361542796889	-5.74299486454729	9.30165489793907e-09	2.76041730415816e-07
Elovl2	1389.64658934831	0.772158104735179	0.134572671836607	5.73785222658507	9.58847196705828e-09	2.8405427655394e-07
Cryl1	505.304001885085	0.848268291487008	0.147851459419296	5.73730076672007	9.61973375890513e-09	2.84481303420091e-07
Myo18b	58.5031454964447	1.27902311664583	0.222957999188792	5.73661012970789	9.65902514493705e-09	2.85143878666795e-07
Pcdhgb7	96.3066349662315	-1.14975637665811	0.200489425831679	-5.73474821372067	9.76573114285562e-09	2.87790813400105e-07
Fgd2	54.7335730328737	-1.48312046737872	0.258887259139674	-5.728827568832	1.01127121936997e-08	2.97496965335912e-07
Fzd1	616.513472125251	1.04540543235374	0.182613717378139	5.72468184407536	1.03627757583407e-08	3.04323185139723e-07
Dis3	1013.45755828788	-0.526233618039341	0.0920039462870416	-5.71968528825441	1.06721537989023e-08	3.12864564319904e-07
Nipal3	2248.46638376699	0.920931224786804	0.161197641004269	5.71305646316758	1.10964840570985e-08	3.24740432908432e-07
Pde6b	10.236685621913	-2.08490581380393	0.365067829297068	-5.71100942479204	1.12308025622282e-08	3.28102650632847e-07
Igsf6	14.6325083933702	2.67401079280027	0.468610248824304	5.70625759788459	1.15487178880193e-08	3.36807686108972e-07
Sh3gl3	1807.82840719841	0.70550589905162	0.123706007087099	5.70308520713054	1.17658129412431e-08	3.42547443665227e-07
Figf	11.8709578120766	-2.03964006935388	0.35779943189385	-5.70051231931242	1.19447899831613e-08	3.47159593211121e-07
Tmem132e	282.958720889688	1.09555221150305	0.192279344663567	5.69771138662837	1.2142638027137e-08	3.52303411900747e-07
BC018473	10.4580647252836	-1.80357468850758	0.316686022932291	-5.69515089995997	1.23262852289147e-08	3.5701827165601e-07
Creg1	1354.5195658876	0.557895294417577	0.098045516643855	5.69016629739534	1.26915709012022e-08	3.66968949037159e-07
Adamts15	472.038693333872	-1.0296719093276	0.180966851212675	-5.68983712999191	1.27160599503093e-08	3.67048527044311e-07
Gm4890	40.6128636648543	1.41409609226906	0.248701904893143	5.6859077652688	1.30119612430669e-08	3.74948767150901e-07
Camk2d	2306.8948821322	-0.891434138614745	0.156861915480472	-5.68292268957866	1.32412135042353e-08	3.80904823224049e-07
Nap1l5	7810.24786880943	0.629160462438492	0.110749429859243	5.68093635550202	1.33959322376069e-08	3.84700190075222e-07
Khdrbs3	3898.67791496378	-0.618791237923796	0.108940405424928	-5.68008936179526	1.34624387740976e-08	3.8595372010087e-07
Vstm2a	4199.63492126801	-0.776315263995071	0.136724176712652	-5.6779662723925	1.36305581290659e-08	3.90111194182045e-07
Aff1	350.182946543579	-0.860147156227184	0.151594615261761	-5.67399544332067	1.39504843951227e-08	3.98592012683659e-07
Oasl2	16.1546970344533	1.84965333030156	0.326228289953157	5.66981278836102	1.42953639565359e-08	4.07755938800786e-07
Nlrp3	8.96206432934245	-2.18222720536376	0.384952613101861	-5.66882034591185	1.43784032855647e-08	4.09432913794344e-07
Syne1	3873.79395005337	-0.483792283853607	0.0854011637931154	-5.6649378341681	1.47077849050552e-08	4.18107164826199e-07
Ica1l	2088.77690682205	0.507577887137204	0.0896208964560839	5.66361091228236	1.48220289111644e-08	4.2064668940155e-07
Iqgap2	239.828186026457	-1.29257732399204	0.228244964928573	-5.66311429650391	1.48650073331618e-08	4.21158580247935e-07
2510009E07Rik	2112.05026998253	-0.671590524752086	0.118607504008369	-5.66229371713865	1.49362878031195e-08	4.22469272769641e-07
Osbpl3	607.514622277871	-1.01205344298426	0.178831013223742	-5.65927254305741	1.52015978133877e-08	4.29254482737232e-07
Slco5a1	635.243209705441	1.00711063169864	0.178072103390541	5.65563393997704	1.55272086246796e-08	4.37542459788163e-07
Tapbp	387.576590771423	0.807580418953248	0.142797705433816	5.65541593613033	1.55469309411878e-08	4.37542459788163e-07
Accsl	11.7077134251859	-1.97738965406201	0.349855953519743	-5.65201087524275	1.58581554757226e-08	4.45558757675627e-07
Cx3cr1	19.7078068454867	2.2502455418929	0.398234292283175	5.65055693469211	1.59928823820512e-08	4.48422539444738e-07
Kcnk10	1407.09000164394	0.561767759690786	0.0994219607850159	5.65033877078243	1.6013193846096e-08	4.48422539444738e-07
Pls1	78.4202021948207	-1.23472430671401	0.219189043772613	-5.63314792319142	1.76949556174159e-08	4.9469705390014e-07
Tmem144	22.4157910069069	-1.3490947188157	0.240205277849083	-5.6164241306276	1.94949790887764e-08	5.4411936676542e-07
Cdyl2	536.578386468524	0.69364840765548	0.123645326229793	5.60998485592854	2.02344321152349e-08	5.63826106762139e-07
Rnf112	2201.52880813274	0.6079234665651	0.108476869042087	5.60417600483321	2.09247999910454e-08	5.82102426110037e-07
Arsb	388.848315153777	1.20829636788305	0.215706807689709	5.60156807670699	2.12421329699196e-08	5.89958317977077e-07
Sgk1	1648.22615955803	-0.831662495488128	0.148636287141847	-5.59528572383173	2.20258727678354e-08	6.10720669224413e-07
Faim2	1491.23484682902	0.990469413003126	0.177030713453104	5.59490154947325	2.20746995754457e-08	6.11071109886846e-07
Fmn1	171.007610959976	-0.85038304133057	0.152058099599861	-5.59248763182193	2.23839103803213e-08	6.18616547761221e-07
Dpysl3	78569.398146434	0.562938533595712	0.100698877067696	5.59031590011941	2.2665688075843e-08	6.25380406615499e-07
Ccdc109b	119.893546096118	-1.01493872269126	0.181738027156546	-5.58462496028425	2.34205069113529e-08	6.44322090724832e-07
Gnl3	1444.94764155361	-0.604680312291926	0.108277054132014	-5.58456560477426	2.34285066744668e-08	6.44322090724832e-07
Dclk3	304.497884039178	1.07938520692242	0.193306701541373	5.58379610388934	2.35324581435021e-08	6.46128598717361e-07
Fosb	1661.33604774677	-1.30110634512506	0.233114116009144	-5.58141380453349	2.38571279602421e-08	6.53979647299754e-07
Csrp2bp	260.52712517987	-0.665772958325796	0.119366736168653	-5.57754178169979	2.439412047267e-08	6.67616075042958e-07
Pcdhga12	151.773632178271	-1.10796150330923	0.198771640977154	-5.57404214133632	2.48895484799346e-08	6.80072679016465e-07
Cacnb3	3651.46301325781	0.854300722102907	0.153526345839343	5.56452195505836	2.62872033061919e-08	7.16833388434739e-07
Slc7a11	504.841728318276	-1.01287515158565	0.182030826812175	-5.56430561418463	2.63198330468754e-08	7.16833388434739e-07
Spire1	7097.04825670503	-0.485972588231443	0.0873546036244021	-5.56321668312955	2.64846694418364e-08	7.20161237028743e-07
Fcrl5	6.16253640892	3.61812825529277	0.65089138498911	5.55872813611338	2.7174759134973e-08	7.37737914394137e-07
F2rl2	15.7941449924245	1.96447140640786	0.353564125115306	5.55619551550144	2.7571802727836e-08	7.47315346488346e-07
Myh3	19.6891594280677	-1.64350455000046	0.29589551009754	-5.55434095454401	2.78661099424758e-08	7.54081943090779e-07
Ctss	72.4465643482169	2.26412548783659	0.408048662631527	5.54866538033756	2.87858513367615e-08	7.77724617076088e-07
Mx1	12.5160729402552	1.81520764607752	0.327186215799684	5.54793435182142	2.89064365461988e-08	7.79734964088039e-07
Osbpl5	918.535266165842	0.622802179619113	0.112404710364644	5.54071246301622	3.01243502741709e-08	8.11291513125439e-07
Ccndbp1	1495.58215323906	0.45298816249433	0.0817995445883835	5.53778342867033	3.06323718842843e-08	8.23659604519147e-07
Kcng1	5.77836596154214	-3.18078675138603	0.574840191926576	-5.53334091119416	3.14187956634588e-08	8.43462295028881e-07
Cntnap5b	332.73998776583	-1.3136764154476	0.23755783734365	-5.52992243967622	3.20372404554164e-08	8.58699749730415e-07
Samd5	154.740771475321	-0.958753855700131	0.173421848075731	-5.52844907569809	3.23074175890582e-08	8.64569022834924e-07
Lor	27.1041899193823	1.34873907769916	0.244129595678135	5.52468484598386	3.30077562287002e-08	8.81912929869987e-07
Asl	421.685065081656	0.752017066559296	0.136134695422017	5.52406617745788	3.31242603803513e-08	8.8322017258171e-07
Ccpg1	2068.70636796437	0.6555619549255	0.118678020802737	5.52386996759204	3.31612927523869e-08	8.8322017258171e-07
Rnf182	671.72020354861	0.955812117312508	0.173160653266137	5.51979967321724	3.39386346487192e-08	9.02500448312239e-07
Nov	3609.82790804458	-1.4014950262162	0.254041700048864	-5.51679124311729	3.45245126565719e-08	9.16636667796969e-07
Rarb	141.310390970141	-0.822689422041969	0.149277251494576	-5.51115065293029	3.56495419571793e-08	9.45020667957502e-07
Lrrn1	1248.75548406336	-0.999691355984393	0.181444487455607	-5.50962649790605	3.59595897247586e-08	9.51745504846823e-07
Gcg	6.1869130707494	3.69991325927124	0.671871060260908	5.50687993293602	3.65249187985656e-08	9.65195272038463e-07
AB124611	11.997201535905	2.05524582965509	0.373681627217214	5.49999165054057	3.79809234065613e-08	1.00210292600499e-06
Nudt10	1025.85163430846	0.620309514604102	0.112837936816549	5.49734895997432	3.8554328812141e-08	1.01564492405899e-06
Mkx	154.434963396168	-0.994298453707737	0.180884853800357	-5.49685854187187	3.86616582509156e-08	1.01688592091115e-06
Zcchc12	12232.9216737711	0.501682431394286	0.0914765172967293	5.48427559574596	4.15167115863007e-08	1.09028179136279e-06
Fam64a	34.5133933572809	1.25104286351467	0.228207298342947	5.48204580922131	4.20435325233675e-08	1.10240231395898e-06
Bhlhe41	158.463124528486	0.82159820592434	0.149878713161335	5.4817538034233	4.21130014965274e-08	1.10251185003157e-06
Lgr5	24.2748086698648	-1.67317787390209	0.305310324237834	-5.48025317545011	4.24717642272916e-08	1.11018298876478e-06
Gpc4	255.086416987245	-0.967160506773151	0.1766600789063	-5.47469758171074	4.38259407576656e-08	1.14380963776498e-06
Morc1	11.4864314654186	2.032781025582	0.371333328343855	5.47427572593119	4.39304610105054e-08	1.14476815528302e-06
Rsph9	636.424073657609	0.602198103552013	0.110015607210006	5.47375157783288	4.40606622280604e-08	1.14639189889527e-06
Fzd8	60.0155296346482	-1.13060615515268	0.20656136757472	-5.47346373829415	4.41323221824753e-08	1.14648983442043e-06
Lsm6	1123.25366151644	0.664975781240629	0.121706677035807	5.46375759684071	4.66159993133846e-08	1.20915171183689e-06
1110015O18Rik	133.044240142937	1.23772924308728	0.226800656718007	5.45734417615119	4.83308969277801e-08	1.25171092871548e-06
Csmd2	1059.1955804784	-0.811759911036396	0.148820921329386	-5.454608826401	4.90807692602313e-08	1.26918509912445e-06
Cdh9	602.912362049566	-0.976957109515143	0.179169258132952	-5.45270499914776	4.96093302328504e-08	1.2808916671436e-06
Vat1l	4464.28482438056	0.736637851912653	0.135211368321815	5.44804672162915	5.09259825594843e-08	1.31287960534267e-06
Rims1	2285.3744438043	-0.513110058272645	0.0941902252838622	-5.44759349206649	5.10558801338543e-08	1.31422193893333e-06
Slc20a1	3088.7525960114	-0.758393204587293	0.139333925051294	-5.44299031487199	5.23934966400378e-08	1.34660058487622e-06
C1qb	62.3303032233074	2.24106330571511	0.412145580859174	5.43755267506035	5.40173835051683e-08	1.38622726119798e-06
Actn2	113.752793504076	-0.829257430451692	0.1525580837813	-5.43568331416953	5.45868315990706e-08	1.39871508100441e-06
Phf21b	130.138970362368	-1.07092715184862	0.197052002198326	-5.43474382346429	5.48752132879084e-08	1.40397401754488e-06
Pcdhgb8	34.3580700637746	-1.24036392242467	0.228341330989863	-5.43206049052825	5.57070308962504e-08	1.42309973330421e-06
Snca	10541.5739846453	0.721104093876198	0.132965160490011	5.42325592071442	5.85231091111793e-08	1.49278129977549e-06
Bmper	108.761437670866	-0.890745990745578	0.164260319369541	-5.42277035722572	5.86823620551232e-08	1.49458577023048e-06
A730017C20Rik	746.793196707296	0.859748025999528	0.158705062765028	5.41726905884807	6.05162390523307e-08	1.5389717057796e-06
Pcyox1	3382.35912667497	0.571138106538729	0.105456917240602	5.41584299525526	6.10006120202229e-08	1.54895689409546e-06
Meig1	63.7017495604897	0.996549761361872	0.184055994350699	5.41438362210063	6.15001871127606e-08	1.55907222891875e-06
Igf2bp3	47.4343818822765	-1.06571931402337	0.196839963481643	-5.41414098627767	6.15836300301317e-08	1.55907222891875e-06
Tnik	6226.67559863416	0.719361518142542	0.132954160528219	5.41059802329287	6.28146284379953e-08	1.58785601168262e-06
Hlcs	247.312687643432	0.769407255852662	0.142280039059194	5.40769640590666	6.38405185369915e-08	1.61137667565865e-06
Nr3c2	473.454744199945	-0.916756441042	0.169547126151176	-5.40708923738748	6.40572323077635e-08	1.61443346977447e-06
Swap70	194.624090084083	-1.24665689287781	0.231011447771431	-5.39651564848546	6.79474881863284e-08	1.7099274001704e-06
Frrs1l	4124.40676925807	0.665652601618973	0.123363524622507	5.39586238035816	6.81952033169418e-08	1.7136074452528e-06
Ctsh	34.0276785199812	1.84439205140586	0.34208641536264	5.39159688481245	6.98342900070728e-08	1.75218695551179e-06
Herpud1	1864.46273596134	-0.796007856102731	0.147655756587731	-5.39097069087025	7.00781049137615e-08	1.75455954537034e-06
Snn	5412.3707673436	0.619735992418346	0.114961345840578	5.39082060919641	7.01366631010883e-08	1.75455954537034e-06
Disp2	3163.69280871374	0.842312232673232	0.15636578077616	5.38680668169344	7.17205026050601e-08	1.79152722927374e-06
Astn2	360.858821949672	-0.864882966264196	0.160763452606801	-5.37984816971769	7.45486849500581e-08	1.85942259094044e-06
1700001L05Rik	192.348514680535	1.27825702817207	0.237683861344953	5.37797148253545	7.53297443552337e-08	1.87613283655232e-06
Pcdhgb6	209.907825365289	-1.00809697644846	0.187470620857502	-5.37735977956098	7.55860376957269e-08	1.87974349415323e-06
Folr1	44.7374918793474	-1.50807813823031	0.280550482727871	-5.37542521248528	7.64021600340986e-08	1.89724540343498e-06
Tktl2	76.7200207090007	-1.02738464889763	0.191355151044243	-5.36899395334326	7.91770737682155e-08	1.96326588494873e-06
Strip2	284.619226590207	-1.20014958791034	0.223760370979256	-5.36354843647271	8.16027563430128e-08	2.01630238645906e-06
Ap3m2	3713.70427541104	0.41612549330155	0.0775857277825645	5.3634283674924	8.16570431762931e-08	2.01630238645906e-06
Vmn2r-ps54	13.7676383974918	-1.72423168419348	0.32148166662854	-5.3633903988241	8.16742172413832e-08	2.01630238645906e-06
Cldn1	24.6822172172243	-1.23517038351674	0.230319095393116	-5.36286572942859	8.19118951778306e-08	2.01921790069029e-06
Mapk15	120.038047476248	0.927259282568569	0.172949798529417	5.36143603781562	8.25629569750513e-08	2.032300424899e-06
Adamts16	37.356832568595	-1.1265537240661	0.210232940448406	-5.35859757116689	8.38704380413699e-08	2.06147920926721e-06
Cacna1i	474.787465641768	-1.19312828938645	0.222680880269673	-5.35801855975033	8.41395988830412e-08	2.06508905049278e-06
Tmem132c	134.054295438299	-0.937574431953529	0.174996752198919	-5.35766761481256	8.43031470281102e-08	2.06610005909531e-06
Nek6	1705.77092948395	0.582005883262273	0.10869778428898	5.35434909799977	8.58649440456032e-08	2.10132673210733e-06
Grasp	252.611926085323	-0.978718743791823	0.18283419594926	-5.35303988791811	8.64887741496515e-08	2.11353030432853e-06
Trem3	13.2901394255395	-1.6172191734305	0.303035606276073	-5.33672987575318	9.46378677547235e-08	2.30756223936796e-06
Ly6e	1137.4709843288	0.843240964008133	0.158013526262142	5.33651127188445	9.47519843805402e-08	2.30756223936796e-06
Tle4	973.405881126564	0.806031877450008	0.151045680232902	5.33634511233397	9.48388128699138e-08	2.30756223936796e-06
Gm10754	29.9936779237831	1.26567182731037	0.237205023806818	5.33577159116639	9.51391047876211e-08	2.31153801934355e-06
Agbl4	58.6472015074935	1.10744629363416	0.207671092021722	5.33269355331519	9.67665375949598e-08	2.34770079573059e-06
Plekhb2	10947.9643206437	0.301089175450542	0.0564645868733999	5.33235417316731	9.69476168521137e-08	2.3487194521733e-06
Zc3h12d	6.53151784521792	-2.08473357704781	0.391470751793551	-5.32538782909439	1.00737867283591e-07	2.43704817614717e-06
Cacng5	414.575565793936	0.80297453628132	0.150933253311799	5.32006379417615	1.03730872318897e-07	2.50586482114005e-06
Aldh3a2	1432.42918310269	0.40880642239991	0.076846869144358	5.31975377724187	1.03907780614297e-07	2.50655254779003e-06
Sash3	9.03079372226726	2.21573547069152	0.417092109633807	5.31234089428559	1.08225906168934e-07	2.60699379681686e-06
Rtp2	5.31680904365566	-2.6458888020433	0.498179942044335	-5.31111066251607	1.0895913908609e-07	2.6209174111221e-06
9330158H04Rik	12.9386580077738	-1.60280042864128	0.301807570955015	-5.31067005234332	1.09222915480552e-07	2.62352510783016e-06
Nudt11	2134.59527681115	0.510553200852199	0.0961589994612607	5.30946873108725	1.0994524370862e-07	2.63712412679512e-06
Rnf32	410.669251504083	0.705093654251466	0.132809288709113	5.30906882421307	1.10186722974848e-07	2.63799593937206e-06
St8sia4	3256.93354247498	-0.857446803102634	0.161511461179004	-5.30889137429277	1.10294038445853e-07	2.63799593937206e-06
AF251705	17.5850489843772	1.82285903280173	0.343525677096544	5.30632542000473	1.11857189455586e-07	2.67159901152338e-06
Unc5d	2833.79241532021	-0.811801178561995	0.153079833663426	-5.3031229465985	1.1383819570662e-07	2.71507312528529e-06
Slit3	146.191222662007	-1.14341695645556	0.215676928166607	-5.30152652940367	1.14838355855577e-07	2.7350641424221e-06
Id2	1592.07079682533	-0.543485331958048	0.102522364963177	-5.30113924072326	1.15082272014373e-07	2.73701302145732e-06
Npas4	5996.61875363935	-1.49470715448045	0.282070171951844	-5.29906137943445	1.16399502701692e-07	2.76444726107e-06
Amz1	200.71620793507	1.00932264496788	0.19062967035627	5.29467759704741	1.19226569177766e-07	2.8249256054026e-06
Pcdhb21	136.140002358997	-0.991984233028011	0.187357912478643	-5.2945948207076	1.19280584901816e-07	2.8249256054026e-06
Hsh2d	8.43700828253463	-2.08759033227801	0.394394022138701	-5.29315916341107	1.20221198844317e-07	2.84321451496518e-06
Slc43a2	1272.74409590444	0.683978873300671	0.129303875106533	5.28970127722115	1.22516291562696e-07	2.8934406983604e-06
Chst9	8.65479779070844	-2.04400974129189	0.386484783292438	-5.28871984009074	1.23175384187459e-07	2.90494348797406e-06
Colgalt2	88.3016852399118	-1.03767166656735	0.196434118326788	-5.28254294827272	1.2740295526459e-07	3.00045509427874e-06
Masp2	42.1040885658174	-1.67972854142149	0.318101888871508	-5.28047333318408	1.28850577723766e-07	3.03032152568735e-06
Kcnh3	888.471060355195	-1.04077298802163	0.197317815876095	-5.27460221166839	1.33044351438856e-07	3.12459933017598e-06
Bpifb2	3.95380510294219	-2.61336456211175	0.495954558434446	-5.26936292381547	1.36898057646282e-07	3.21063972418767e-06
Emr1	268.289931763056	2.06970987218207	0.392901788987401	5.26775374964872	1.3810319039528e-07	3.23441119696907e-06
C1qc	76.2208916083065	2.21004035331568	0.419756411945346	5.26505442304819	1.40147834324004e-07	3.27775115013176e-06
Pik3ip1	493.144029841644	0.884764571607637	0.168105572627812	5.2631483762083	1.41609202137628e-07	3.3073485301466e-06
Ptger3	283.131222596996	-0.786409341156705	0.149586379272469	-5.25722559086931	1.46244875517924e-07	3.41089912706583e-06
Fabp5	6559.75791525619	0.621086311010331	0.118153667533511	5.25659781854994	1.46744739916648e-07	3.41783679756209e-06
Tubb2b	51669.6864826311	0.535243605016493	0.101829506042701	5.2562722320586	1.47004638861053e-07	3.41917401075446e-06
Smarcd3	1710.714149558	0.639889967229382	0.121768873402114	5.25495514043469	1.48060555783753e-07	3.43899662305978e-06
Sh3bgrl	9059.50288270146	0.661051709105283	0.125817081037015	5.25406966730377	1.4877456215585e-07	3.45083414363143e-06
Drc1	701.084884256189	0.532793121810423	0.101421022268304	5.2532809263246	1.4941337135033e-07	3.46089737808186e-06
Ulk3	133.101486276776	-0.73524178454818	0.139972269625553	-5.25276746969284	1.49830649679275e-07	3.46580869929348e-06
Cdk18	54.9427560440547	1.19421586706104	0.227696180520608	5.24477777506221	1.56470804902265e-07	3.61445418820745e-06
Lrp1b	1002.23692719654	-1.04819670813124	0.199998685802988	-5.24101797930704	1.59693153161913e-07	3.68385052498915e-06
Slc2a2	11.201336548744	-1.78141600415526	0.339989077588651	-5.23962715740701	1.60901346210558e-07	3.7066577518574e-06
Plcl1	779.361983079139	-0.766538262076789	0.146452403076399	-5.23404359351424	1.65841312063059e-07	3.81525394481855e-06
Mocos	31.2487306324661	-1.24881545218708	0.238993462578748	-5.22531218516322	1.73861518576705e-07	3.99432054787244e-06
Cyb5r3	3585.25917003803	0.522072933216612	0.0999248435958962	5.22465599573931	1.74479179604129e-07	4.0030644385806e-06
B3gnt2	189.514417221418	-0.688622877866827	0.131836143653488	-5.22332388359882	1.75739607751084e-07	4.02651155561033e-06
Col9a1	15.9803555078171	-1.53366775350212	0.294040832476135	-5.2158325787171	1.82993405176128e-07	4.18634223205826e-06
Ptpru	248.312500971568	-1.06529546704273	0.204251289079822	-5.21561196427215	1.83211353161853e-07	4.18634223205826e-06
Peg3	9543.80372190059	0.689754528839738	0.132268666103648	5.21479915960772	1.84016501245521e-07	4.19905762166469e-06
Usp25	888.476616333356	-0.729999898006044	0.140046740716199	-5.21254471380644	1.86267651695291e-07	4.24469037318041e-06
Itgam	16.6120843166819	1.91965601460338	0.368295657570459	5.21226893433066	1.8654484867845e-07	4.24527805226996e-06
Tmc3	10.4784528356804	1.85665277867943	0.356257154536883	5.21155225947109	1.87267073151129e-07	4.25597819277249e-06
Fcer1g	38.1797321963693	2.14009013754077	0.410806815573062	5.20948060356645	1.89370002669381e-07	4.29798637778921e-06
C130080G10Rik	11.3209664883664	-1.71769220372101	0.330000672670823	-5.20511727997116	1.93874124083074e-07	4.38931259298947e-06
Gm2061	84.2855021964514	0.893442043330426	0.171648111976017	5.20507935126754	1.93913727014695e-07	4.38931259298947e-06
Zfp804b	341.587143516708	-0.86237145268356	0.165711070597072	-5.20406662980548	1.94974047850128e-07	4.40683474365504e-06
Olfml2b	84.7972353197931	-1.28700835533734	0.247329980533631	-5.20360836385678	1.95455692584382e-07	4.40683474365504e-06
Ptk2b	789.66572590435	-0.861613190525015	0.165580401299865	-5.20359404712782	1.9547075820192e-07	4.40683474365504e-06
Angpt1	956.765496373639	-1.0630627889923	0.204328683723986	-5.20270952475926	1.96403728722778e-07	4.42196448428378e-06
Plce1	428.322648235448	-1.05075908487254	0.202106161189809	-5.19904528732162	2.00314721032701e-07	4.50401382071663e-06
2310015A10Rik	93.2291108776435	0.957740847759094	0.184290368870078	5.19691209926596	2.026261143055e-07	4.54992628479078e-06
Crlf1	216.44106703989	0.91040974278759	0.175270589182386	5.19430982137123	2.05480701063062e-07	4.60789789927073e-06
Dazl	91.7099685893929	0.885843700338372	0.170597717169869	5.1925882422935	2.07390519021228e-07	4.64455743261599e-06
Siae	478.696256571769	0.542333805674406	0.104457531340688	5.19190716757018	2.08150789009841e-07	4.65540956717904e-06
Parp11	1239.00517697006	0.520357455159809	0.100277555666631	5.18917171146172	2.11231546934204e-07	4.71806336181346e-06
Ly9	22.5715457576471	1.94801156932174	0.375728777235364	5.1846216934868	2.16453774421619e-07	4.82832025744182e-06
Vav1	26.2978125562349	2.04469532529617	0.394456443712878	5.18357693957331	2.17670372968479e-07	4.84905266219755e-06
Adora1	2795.17835811035	-0.59878576890212	0.115539617071836	-5.18251474323158	2.18914055931691e-07	4.87033300192693e-06
Cc2d2a	496.456484040666	0.577159116577162	0.111415223380116	5.18025364099538	2.21584396579381e-07	4.92325542189399e-06
Mtus1	642.21391893901	0.734218147968996	0.141754932814421	5.17948923110988	2.22494255842691e-07	4.93697503831757e-06
Dnah10	50.4474729748812	-1.29787290969883	0.250687331607526	-5.17725766745473	2.25171134142759e-07	4.98981597261762e-06
Map2	55630.2962778453	0.574327598047292	0.110995850537598	5.17431593402447	2.28747485155636e-07	5.06242468458462e-06
Nmrk2	18.5499477962472	-1.4510825643859	0.280498916184578	-5.17321986168043	2.30093995826928e-07	5.08555918001767e-06
Srpr	1399.05858169838	-0.395047310211532	0.0764436757441973	-5.16782201229406	2.3683768870667e-07	5.22776628954358e-06
Galk1	124.027239555734	-0.977855432462297	0.189287668536867	-5.16597536448521	2.39188296261494e-07	5.27275923064176e-06
Slc22a15	179.92815055063	0.742053654280879	0.143672683892489	5.16489031997315	2.40579950657605e-07	5.29652287718946e-06
Cd84	23.0038672730712	1.51919216302153	0.294185618048124	5.16405993298086	2.41650267635708e-07	5.31315940012573e-06
Clec4a3	15.2306225164046	2.30374076921961	0.446254275328769	5.16239484209394	2.43810343515167e-07	5.35368200337725e-06
Syce1	14.4593035465762	-1.76667188894308	0.342747869054406	-5.15443580675524	2.54395686131926e-07	5.57886435847235e-06
Fam189a2	511.027353629748	-0.797807377470128	0.154855171154604	-5.15195825571503	2.57780424150394e-07	5.64575906900591e-06
Ahr	469.982176598854	-0.638198049454122	0.123943219918715	-5.14911626366225	2.61716624965814e-07	5.72454265436882e-06
Fkbp7	39.8612114856305	-1.09307466005394	0.212317565867692	-5.14830063912423	2.62856956909607e-07	5.74204731484556e-06
Upk1a	14.820816244527	-1.47201149820241	0.286127487727591	-5.1446000868111	2.68091293760764e-07	5.84882375509595e-06
Ahsa2	933.178729921884	0.504605501842984	0.0980990137453245	5.14383868479039	2.6918069638481e-07	5.86501321181149e-06
Sim1	4.36158795529614	-3.46941856690842	0.674519742879307	-5.14353894535184	2.69610730931488e-07	5.86537095325231e-06
Nhsl1	338.1273097478	0.76838410354714	0.149393898602773	5.14334327394599	2.69891817522033e-07	5.86537095325231e-06
Polr2m	4978.75275983768	0.26459973398738	0.0514497254650981	5.14287941471866	2.70559293499097e-07	5.87231906172976e-06
Camta1	5180.46568314323	0.787964105747297	0.153471453873487	5.13427146130282	2.83239033750449e-07	6.13963327844684e-06
Ccng2	2089.40412893963	0.671981210539816	0.130892597791289	5.1338366101596	2.83894579279154e-07	6.14595367398435e-06
Frmpd3	82.6875492371446	0.8521352534183	0.166076309995106	5.13098619209091	2.88228055591786e-07	6.2317784209e-06
Cnksr1	13.2453171650517	-1.54224901315312	0.300621879274661	-5.13019550298287	2.89441409339006e-07	6.24531601620811e-06
CK137956	34.0717148562747	-1.36539438162425	0.266153749314542	-5.13009636400282	2.89593890838029e-07	6.24531601620811e-06
Fam46a	524.118254902212	-1.34106753069523	0.261554179615939	-5.12730300339466	2.939222676401e-07	6.3305757798096e-06
Wt1	13.7275756129321	-1.75140017847606	0.341669257870374	-5.12601042713805	2.95946223114234e-07	6.36604831019995e-06
Mtmr10	233.315396756398	-0.615436757393748	0.120098335840085	-5.12444034372983	2.98422813870024e-07	6.41115475192012e-06
Gm5148	55.7428069968899	1.12322772887178	0.219731427691343	5.11182101110079	3.19068069367581e-07	6.8459763905222e-06
Nostrin	21.4242851748512	-1.29935070326097	0.254392888874298	-5.10765339790224	3.2618426830019e-07	6.98978116055459e-06
Zfand4	91.2751911509912	0.891840967994065	0.174624296922668	5.1071986184661	3.26970012860432e-07	6.99773845014101e-06
AI506816	258.440134674191	-1.07862356350382	0.21120716884411	-5.10694579832156	3.27407612464367e-07	6.9982341064219e-06
Dusp5	82.57868258992	-1.20246130529466	0.235497687785045	-5.10604293657538	3.2897497117444e-07	7.02284622408545e-06
Cdkl2	3516.34921513717	0.692677463946845	0.135755214888596	5.10240040881873	3.35372242171504e-07	7.15037333498487e-06
Rtdr1	7.27606882208045	1.81993852294407	0.356706605818494	5.10206004951343	3.35976103456137e-07	7.15313408686584e-06
Fam26e	40.4696643471226	-1.16548687527726	0.228453837613653	-5.10162966598205	3.36741187482997e-07	7.15313408686584e-06
Ms4a6c	47.6801576157509	2.18582975034088	0.428463568208838	5.10155334671415	3.3687703413586e-07	7.15313408686584e-06
Scg2	28701.6185261129	-1.01214112382647	0.198405584682213	-5.10137416468203	3.37196182230558e-07	7.15313408686584e-06
Plec	374.471325095408	-1.02455722888192	0.200891785192538	-5.1000454194778	3.39571986204732e-07	7.19449505527365e-06
Hbq1b	81.6379962534905	1.04474736279325	0.20487170626132	5.09951999648325	3.40515896656059e-07	7.2054529209702e-06
Pnmal1	1639.9183607916	0.370523510543068	0.0727597930036524	5.0924211744867	3.53519706541033e-07	7.47125627616005e-06
Hcls1	29.541456361782	1.92605252971811	0.378424048748413	5.0896673614911	3.58692162959334e-07	7.57109482966414e-06
Tfrc	12158.8463291131	-0.956056987082015	0.187873128005081	-5.08884371721409	3.60253343655969e-07	7.59455425839538e-06
Pparg	27.6833798136455	-1.5039351150392	0.295618537831337	-5.08741815067518	3.62970952570702e-07	7.64230362233027e-06
Psd2	1479.11084931371	0.559788192763892	0.110082271572498	5.08518024535157	3.67277105588657e-07	7.72333898501875e-06
Adcy5	2714.47392516106	0.57753424356574	0.113748836024425	5.07727607376773	3.82884341946999e-07	8.04152362949878e-06
Etl4	637.784921955937	-0.703110601693427	0.138526394235185	-5.07564356652285	3.8618663411342e-07	8.10080435234684e-06
Def6	40.6046018792829	1.07111202333216	0.211047664947876	5.07521380820158	3.87060523862731e-07	8.10906204211671e-06
Prlr	20.9898624793652	-1.55894010822865	0.307233637543223	-5.07411922956948	3.89294917259461e-07	8.14576700476239e-06
Col26a1	566.098285338955	-0.794061980399804	0.15650195116384	-5.07381521121427	3.8991772365093e-07	8.14870133857624e-06
Tprkb	1122.78294324805	0.559053100773248	0.110205972188466	5.0728022236145	3.91999858164636e-07	8.1820885104673e-06
Ifit2	253.197328870709	0.849562877714674	0.167526415579454	5.07121742428581	3.95278855740246e-07	8.2403441457158e-06
Spib	9.02631440785417	2.54491028938786	0.502049588044783	5.06904168430639	3.99823666350643e-07	8.32481187422559e-06
1810032O08Rik	164.419229380069	-0.766756892116145	0.151296867581542	-5.06789667474708	4.0223563583655e-07	8.36471791469949e-06
Rps6ka2	1606.94462378221	-0.418758994274303	0.0826855300001872	-5.06447735502639	4.09522311333391e-07	8.50577336921973e-06
Ifngr2	3069.97143627191	0.502556230575257	0.0992744207273364	5.06229325634203	4.14243175964984e-07	8.59325585914585e-06
Ankrd45	461.474973813507	-0.698851547167895	0.138106151529176	-5.0602492316952	4.1870880871809e-07	8.67523551412721e-06
Parp3	54.5505332301867	-1.13973824620822	0.225249439853057	-5.05989380906666	4.19490035142206e-07	8.68077050663149e-06
Lhx2	1897.79805230737	0.808650776982932	0.159926417651351	5.05639273897722	4.27260995328104e-07	8.83075785448025e-06
Gcnt1	10.4868484597166	-1.58578448118643	0.313658969692751	-5.05576002733098	4.28680098244712e-07	8.84925689359439e-06
Trim43a	11.1970977849081	-1.67113445818561	0.330747055618334	-5.05260569912381	4.35823025822357e-07	8.98572358246194e-06
Fam102b	4319.17414257377	0.801405220241068	0.158751475890417	5.04817492716894	4.4605064597467e-07	9.1840990471766e-06
Slfn2	13.778052528865	2.15590206017717	0.427083090611186	5.04796866832616	4.46532353294563e-07	9.1840990471766e-06
Col7a1	91.8845652184987	-1.18926854741048	0.235604756612202	-5.04772723824069	4.47096838804859e-07	9.18452216552171e-06
Ssfa2	451.879091229117	-0.832183191047558	0.164899255903539	-5.04661580483031	4.49704362053803e-07	9.22686252447208e-06
Sepp1	184.476432235336	1.12825490369586	0.223623566598378	5.04533095888852	4.52737009626022e-07	9.27781206862258e-06
Slc9a9	662.323694265635	0.662307282903301	0.131371638141254	5.04147845207787	4.6194887954534e-07	9.45511367273045e-06
Gucy1b2	26.9287622599977	1.46389169478885	0.290497743100052	5.03925324571165	4.67351747716123e-07	9.55411817425478e-06
Ifi27	279.177723133397	1.13376299004973	0.225075122857086	5.03726478367682	4.72231320960474e-07	9.62600773304155e-06
Kcna3	799.358993256964	0.6371905345241	0.1264959778276	5.0372394875078	4.72293711748028e-07	9.62600773304155e-06
Fzd5	40.9247181723532	-1.21320755310831	0.240853220489517	-5.03712406519853	4.72578491690835e-07	9.62600773304155e-06
Cd99l2	5436.45235114507	0.557728231222314	0.110873882809151	5.03029403400924	4.8972822037905e-07	9.96331413171162e-06
Sdk1	186.646915511029	-0.8837699692909	0.175835225510025	-5.02612583302036	5.00487555287851e-07	1.01699553051632e-05
Kcns3	140.369739698738	-0.844130237559944	0.168004114388397	-5.02446169626811	5.04846542830071e-07	1.0246200387294e-05
Rbm43	482.421908406616	0.574573760731606	0.114385142286252	5.02315029074074	5.08307368161501e-07	1.0304055484724e-05
Gm13152	50.9388399938172	1.29421027447328	0.257895075880901	5.01835977306896	5.211451212128e-07	1.0551626518944e-05
C1ql2	183.964515519043	-1.1161885008886	0.222465312792165	-5.01735972623914	5.23864242598023e-07	1.05939779646829e-05
Marco	67.4388458932527	1.89957702050361	0.378936410688762	5.01291764771535	5.36108455877346e-07	1.08286212750537e-05
4930590J08Rik	24.0658845398901	-1.30264460683827	0.260029414829352	-5.00960480833735	5.45419174939691e-07	1.10035223273974e-05
Itgb2	35.4553938732188	1.15626305875587	0.230859064872383	5.00852353099084	5.48491705539e-07	1.10523042240233e-05
Pcdha7	141.335244901603	-0.872882764648644	0.174351457371808	-5.00645522444475	5.54415509131813e-07	1.11583555270558e-05
Cd14	14.519198568556	1.68127287928992	0.335854290141057	5.00595921696814	5.55845259419603e-07	1.11738131554279e-05
Gm136	3.98052348769474	-2.42734280708996	0.484943202842818	-5.00541670212196	5.57413138337891e-07	1.11920074363539e-05
Micall2	34.831476673545	1.18145569458741	0.236296075209043	4.99989554859181	5.73613804767018e-07	1.15036136666222e-05
Arxes2	3021.38168388835	0.566369854790748	0.113297515299477	4.99896095067638	5.76400732415481e-07	1.15457921323462e-05
Hist1h2bc	887.72171388661	-0.790886859440835	0.158337679337841	-4.99493779843356	5.88547335872794e-07	1.17751307032559e-05
Tnfrsf1b	27.4507228900134	1.40543268488152	0.281389407465138	4.99461830330495	5.89522452854695e-07	1.17806818211886e-05
Gpsm2	318.089518482986	-0.609735151252959	0.122089867089066	-4.99415034016006	5.90953514117453e-07	1.17953203775264e-05
Nup62cl	10.5819796464483	-1.59367729090309	0.319548679076552	-4.98727547711534	6.12367202040907e-07	1.22083029204991e-05
Nudcd2	356.600473420535	-0.532156538841087	0.106753534325258	-4.98490792089099	6.1991327927779e-07	1.23441693795811e-05
Scnn1a	13.6508731491151	1.55782032912705	0.312893488163409	4.97875599224193	6.39942606840553e-07	1.2727998656195e-05
Foxq1	4.33612198937437	-2.46921012902456	0.49597681292852	-4.97847896244379	6.40859075951505e-07	1.27312310076672e-05
Lmo4	2360.06801740831	-0.831231869162408	0.16726908681345	-4.9694291096923	6.71503150812266e-07	1.33243269149423e-05
Prkd1	229.959995486888	-1.10697431039022	0.222770578714117	-4.96912256896728	6.72565479584358e-07	1.33297425918562e-05
Scd3	15.0394123210344	-1.41974349685157	0.285746793480474	-4.9685369328513	6.74599528512189e-07	1.33543817566903e-05
5830403L16Rik	31.8938007626147	1.28435024621823	0.258600745029169	4.96653730086262	6.81589481315752e-07	1.34769554818475e-05
Plvap	102.284553403632	0.966348579716513	0.194612104961654	4.96551116338278	6.85203511846777e-07	1.35325690070698e-05
Idh1	10041.1599158475	0.607787012702073	0.122430224356704	4.96435431606551	6.89300042544887e-07	1.35975706990806e-05
Lect1	16.8084596720977	1.46360407894648	0.29500206837563	4.96133497302416	7.00103367683224e-07	1.37945688059497e-05
Slc7a6	568.670162824873	-0.51779947238012	0.104386352292131	-4.96041351201766	7.03432755996965e-07	1.38348398318747e-05
Maml3	266.428359195957	-0.815725622850434	0.164450332603204	-4.96031604155322	7.03785823497592e-07	1.38348398318747e-05
Fcrls	105.793136138491	2.09796781736341	0.423240128249817	4.95692085256406	7.16191343180371e-07	1.40623337452834e-05
Dlgap1	2558.8478099707	-0.645658340688163	0.130306507768663	-4.95492014746046	7.23599997384599e-07	1.41913002971386e-05
Mir335	19.4272798519391	-1.61760452219208	0.326618707323187	-4.95257768744846	7.32368026781259e-07	1.43465968680143e-05
Ucp2	22.5601074277469	1.46614977304963	0.296071603649198	4.95201078042867	7.3450534196774e-07	1.43717928209354e-05
Kcns1	42.3194020599371	-1.09514727062785	0.221214948159795	-4.95060247843997	7.39840866476563e-07	1.44594361936612e-05
Acp5	8.55762269998543	2.06452267246599	0.417172206130114	4.94885000038109	7.46532500613207e-07	1.45733500639938e-05
Adamts9	68.5407282972686	-1.1650960031881	0.235455351930551	-4.94826723468044	7.48770614022596e-07	1.46001623422466e-05
Casp3	4934.57798991932	0.57659063343256	0.116600733959308	4.94500003433752	7.61438510297925e-07	1.48300469260562e-05
Cpa6	16.5487952569725	-1.54971328123113	0.313464377675146	-4.9438258111649	7.66041554079413e-07	1.49025088504435e-05
Calm1	128995.402193233	-0.407461511101155	0.0824445516679579	-4.94224909782019	7.72264569062839e-07	1.50062825238148e-05
Tlr1	20.492872325331	2.11680016004959	0.428533362899499	4.93963911170675	7.82672898867366e-07	1.51910512302004e-05
Rnf128	781.724253123557	0.6429307726054	0.130163949162402	4.93939202630702	7.83665219488041e-07	1.51928483309702e-05
Gm5468	245.843526652091	0.801999265481525	0.162474288217423	4.93616112605023	7.96752900834957e-07	1.54288640865815e-05
Dusp6	3166.80935748279	-0.983500599479908	0.199256658244246	-4.93584810739097	7.98031999979203e-07	1.54359316742827e-05
Tubb3	37503.6251576177	0.624153957932469	0.126523133338357	4.93312125193193	8.09258825061849e-07	1.56351767963322e-05
Cldn14	3.32778295624739	5.28291013316019	1.07136904313359	4.93099008881992	8.18138855140939e-07	1.57886773804684e-05
Mcc	366.731832623299	-0.803135011493171	0.16298694326943	-4.92760337351394	8.32443835064602e-07	1.60328121207435e-05
Chn1	3707.80832406686	-0.567024455634654	0.115072382874594	-4.9275459625495	8.32688394521619e-07	1.60328121207435e-05
Fam179a	22.5949555665369	1.25059686718871	0.25401345381674	4.92334893446614	8.50755567947731e-07	1.63620256496189e-05
Prrg1	125.920516306406	0.881610150437631	0.179113395350762	4.92207826617967	8.56299528490782e-07	1.64499133539196e-05
Isg20	13.3123088242075	-1.73217093098342	0.352026629131244	-4.92056789924728	8.62934561169673e-07	1.6558537499899e-05
Rcan1	2100.56005912122	0.481570846274387	0.0978772891110528	4.92014900134791	8.647835292141e-07	1.65751812421218e-05
Smr3a	7.77366060867247	1.86385410042924	0.379056405561278	4.91708904818372	8.78406008383352e-07	1.6817192582269e-05
9330159F19Rik	4001.07208320233	0.841662081313861	0.171195328963379	4.91638461405628	8.81571184492179e-07	1.68586761283521e-05
Pcdhb12	219.890497866768	-0.698422743270045	0.142099296971559	-4.91503306599635	8.87674761017364e-07	1.69561945865828e-05
Atf6	2372.37253610415	-0.423230155263062	0.0861358001013584	-4.91352207520027	8.94546553447853e-07	1.70681503971982e-05
Tox	46.753226425026	-1.01849480829394	0.207324183542113	-4.91257117666186	8.98897348466297e-07	1.71318065758486e-05
Atl1	2506.30318542961	0.498940074428881	0.101600319477302	4.91081206236116	9.06999870282035e-07	1.72667416117051e-05
Cntnap4	1381.82248026183	-0.840711306083327	0.171244610451435	-4.90941760950632	9.1347267393717e-07	1.7370382401017e-05
Jkamp	2081.7389255231	0.538207448286105	0.109647118261392	4.90854166365823	9.17561379372069e-07	1.74285055703901e-05
Npnt	220.613374728077	-0.698656580192953	0.142359936718655	-4.90767695109126	9.21614930498712e-07	1.74858311420239e-05
Fam13a	111.899664546745	-0.923709702222903	0.188525569497506	-4.89965209857182	9.60065036305155e-07	1.81949025847911e-05
Snx30	3513.82162975492	0.333089976203858	0.0680222789559524	4.89677766338216	9.74209578087394e-07	1.84422678650042e-05
Tmem194	86.1811073634656	0.854100279002233	0.174457329181623	4.89575464102773	9.7929191119387e-07	1.8517719162844e-05
Adamts12	30.9848515979864	1.16429137851331	0.23799164988095	4.89215222086877	9.97392553228953e-07	1.88388933487965e-05
Vipr2	30.9073679923576	-1.0488860358077	0.214530774246365	-4.88921013543339	1.01241378932623e-06	1.91012505548187e-05
Kcnip2	266.856205681321	-0.797315171263639	0.163125918473011	-4.88772831887874	1.0200616376598e-06	1.92240634079502e-05
Nab2	165.837990897057	-0.859380821820399	0.175907092138283	-4.88542452367315	1.03206236856545e-06	1.94285453239645e-05
Cntnap5a	353.229198476752	-0.947452525705131	0.194137644315047	-4.88031329033541	1.05917447665497e-06	1.99167262948728e-05
Smad1	1120.14763026677	0.455802539642359	0.0934543760322184	4.8772733711819	1.07562318121663e-06	2.02035295194928e-05
Hspb3	95.0200366043313	1.0716935023464	0.219771065304416	4.87640855206276	1.0803473712659e-06	2.02588444238985e-05
Ms4a6d	38.4918975696725	2.04911305753026	0.420219231739775	4.87629528293269	1.08096759599269e-06	2.02588444238985e-05
Clca3	5.37149894158947	-2.57655715074343	0.528475173986088	-4.87545541885994	1.08557711925353e-06	2.03226776449169e-05
C2cd4a	10.3870038046465	1.65708535269425	0.340107210453472	4.8722441093937	1.10337718246183e-06	2.0633031121872e-05
Dgkg	2181.29818910259	-0.75133806216811	0.154293102691697	-4.86955054413164	1.11852371126398e-06	2.08931320668182e-05
Spry2	1187.48257763402	-0.91739445657654	0.18849378555572	-4.86697454704868	1.13319616809211e-06	2.11255255306633e-05
Rfx3	6101.4256913524	-0.949316497603966	0.195063130445637	-4.86671415267036	1.13468959639145e-06	2.11255255306633e-05
Tyro3	1909.53449310105	-0.728770306932197	0.149746015612104	-4.86670916720733	1.13471820776452e-06	2.11255255306633e-05
Icam5	1266.23023350993	-0.955362553396004	0.196711422955039	-4.85667044162637	1.19376029582635e-06	2.220026030322e-05
Tpgs2	2298.73603446638	-0.433384572660413	0.0892697630389895	-4.85477453850894	1.20523789732817e-06	2.23890507527872e-05
Dnah5	738.194435490379	0.875058301105064	0.180286951755013	4.85369735627987	1.21180626640791e-06	2.24863303456746e-05
Krt1	92.5651402615957	0.837456023139467	0.172626254563748	4.85126683224312	1.22675371174137e-06	2.27155417244885e-05
Ptk6	3.880978136878	-2.63732715625261	0.543638523820548	-4.8512514119091	1.22684910889101e-06	2.27155417244885e-05
Tm7sf2	1064.63907214748	0.735823258085337	0.151689035665495	4.85086647731071	1.22923280213704e-06	2.27347481893605e-05
Rab5b	6394.81708856551	0.346350647597241	0.0714258251698979	4.84909550254953	1.24025701975826e-06	2.28993281749812e-05
Dst	15700.5893380457	0.703185622064158	0.145016575860524	4.84900169440268	1.24084361483524e-06	2.28993281749812e-05
Larp1b	366.084702598938	-0.545994328175455	0.112653647417415	-4.84666356298599	1.25555079473954e-06	2.3136844786781e-05
Flrt3	2572.23463040929	-0.801637480163785	0.165404733566082	-4.846520791036	1.25645426207972e-06	2.3136844786781e-05
Xlr3c	4.53304659934055	-3.3030150201983	0.681728647405471	-4.84505826881259	1.26574525678987e-06	2.32825429260934e-05
Lrrc59	2749.52621124235	-0.452073969918452	0.0933378608443688	-4.84341472826593	1.27626507463242e-06	2.34505027750197e-05
Pcdhgc3	1465.11320127543	0.686381001009646	0.141736502009061	4.84265514726592	1.28115529676049e-06	2.35147699359757e-05
Fam126b	7403.43023070407	-0.482468601907406	0.099636342263908	-4.84229540090387	1.28347764742601e-06	2.35318171057932e-05
1700020I14Rik	3562.67829656117	-0.504340713405262	0.104288460004063	-4.83601650063308	1.32466930381391e-06	2.42418945909936e-05
Cyld	1948.28134968334	0.555280875517359	0.114823413393048	4.83595513413797	1.32507809472267e-06	2.42418945909936e-05
Rgs13	371.289933508552	1.7134476647218	0.354513135100311	4.83324169141709	1.34327539720767e-06	2.45482125078449e-05
Soga3	3344.03859180096	0.599695210447169	0.124203182859419	4.828340116903	1.37675805638969e-06	2.51329043677799e-05
Plcb1	4475.76719165636	-0.737006111527156	0.152863661517518	-4.82132970132142	1.42604434199537e-06	2.60045191781142e-05
Dtd1	1399.59381545184	0.45742753405453	0.0948996294653941	4.82011928425215	1.43472409637367e-06	2.61330915330152e-05
Ccdc23	525.580110854697	0.602512336866259	0.125004750544403	4.81991551714862	1.43619027257125e-06	2.61330915330152e-05
Hunk	378.822152478971	-0.878000331115508	0.182178318709513	-4.81945567032868	1.43950432899532e-06	2.61651992458719e-05
Klhl13	2196.32067223578	-0.789208977353749	0.163762991812077	-4.81921445511567	1.4412456748464e-06	2.61686822209208e-05
Cdc40	821.727530165519	-0.491698396038216	0.102055158392412	-4.8179671050785	1.45028273053728e-06	2.63044835530103e-05
Rnasel	570.003860866384	0.935203975470442	0.194241356061566	4.81464912741869	1.47458750741933e-06	2.67166144316339e-05
Fbxl21	84.7744386435016	1.03988021900367	0.216069093071173	4.81272080251262	1.48889227488963e-06	2.69468756203498e-05
Ptpn6	37.3610632529423	1.56723715425772	0.325671289918075	4.81232826710628	1.49182049453837e-06	2.69709645297376e-05
Msrb2	124.585388441633	-0.70020869656272	0.145548898010882	-4.81081413966025	1.50316747793429e-06	2.7147043884918e-05
2010107G23Rik	1063.57875323539	0.518316353897216	0.107809645253961	4.80769928030322	1.52677197154134e-06	2.75438798199221e-05
Mcur1	335.513305278105	0.731664596792915	0.152208326638505	4.80699455116288	1.53216165001451e-06	2.76116132573585e-05
Lgi2	1112.5893085116	-0.97747233712378	0.203449021859299	-4.80450742987488	1.55132940695073e-06	2.79272370637207e-05
1500009L16Rik	663.298201507003	0.498849515002344	0.103852213731544	4.8034557673644	1.55950352541724e-06	2.80444904474926e-05
Apol7a	4.45038571826889	-2.3625268960415	0.491975624764078	-4.80212184734647	1.56993108922689e-06	2.82019748645588e-05
Asb5	34.7562091575212	-1.32901541649425	0.277214355250339	-4.79417963508447	1.63341862986816e-06	2.93112720339573e-05
Gatad2a	848.030225282192	-0.414338897936583	0.0864302988193531	-4.79390796510593	1.6356333455408e-06	2.93198563405541e-05
Sash1	393.081469403506	-0.598629073382541	0.124902455716362	-4.79277264765677	1.64491998771125e-06	2.94240874179777e-05
Thsd7a	4144.41435880855	1.41311294026012	0.294842570607151	4.79277106202876	1.64493299316422e-06	2.94240874179777e-05
D630041G03Rik	36.4013982430512	-1.05696739879488	0.220620081710056	-4.7908938778473	1.66039933391378e-06	2.96693155052572e-05
Pcdha10	86.9079070669244	-0.975411128978872	0.20363459242715	-4.79000702853483	1.6677547134616e-06	2.97692453398652e-05
Tcerg1l	287.861250698318	-0.67643818387176	0.141229729452211	-4.78963024637564	1.67088915167457e-06	2.9793700332816e-05
Tes	2281.12261377881	-1.0524320183405	0.219836931175991	-4.78733037579557	1.69014481171125e-06	3.01052587453124e-05
D10Wsu102e	1174.37605454067	0.544352880878311	0.113764048593852	4.78492887345896	1.71047893841221e-06	3.04353502149932e-05
L3mbtl3	1157.63759462082	-0.808341531603414	0.168969210759889	-4.7839575504208	1.71876997881136e-06	3.05506840654827e-05
Gm5544	7.42444337834595	-1.81939279267045	0.380408222248706	-4.78273782284587	1.72923606926598e-06	3.0704395652603e-05
C1qa	56.3843200057681	1.98755302249914	0.415919266082638	4.77869909999369	1.76432999542251e-06	3.12946179650258e-05
Gm11541	14.1946433933972	1.59881162980495	0.334648939026095	4.77757866036526	1.77418654239608e-06	3.14364259757609e-05
Ldlrad4	260.562950222873	-0.70627685280918	0.147838258040588	-4.77736184239451	1.77609999857521e-06	3.14373423227894e-05
Wasf1	835.428247389994	-0.867800289019675	0.181690000246967	-4.77626885266165	1.78577605742485e-06	3.15755125713886e-05
Bcl6	136.2020690213	-0.885954931105157	0.185499963745789	-4.77603829787955	1.78782358087131e-06	3.15786495675658e-05
Lgmn	2232.81971567819	0.405089889664509	0.0848574068671761	4.77377172623929	1.808073146316e-06	3.19029499986332e-05
Abcg3	4.48567569508124	2.55115466083513	0.534479928490847	4.77315334934755	1.8136358824762e-06	3.19676988637715e-05
Isoc2a	84.5211418940939	-0.954251668665007	0.200075193944505	-4.76946516882891	1.8471567705987e-06	3.25245977354845e-05
Arhgap4	99.2363467443467	-1.11491615418956	0.234094249818413	-4.76268065129495	1.91038042717367e-06	3.36027957221402e-05
Golim4	188.721653672272	-0.667237655608143	0.140113887620749	-4.76210935931045	1.91579807403775e-06	3.36630242228943e-05
Stk32b	435.95035761061	0.752015692866434	0.157939189713782	4.76142554757461	1.922302171441e-06	3.37421979905953e-05
Adamts2	30.062778209708	-1.30824182154117	0.27478897316869	-4.76089635786824	1.92735013219713e-06	3.37956742806654e-05
Pcdha6	196.632355066061	-0.92496352496303	0.194300956073983	-4.76046821205983	1.93144354887153e-06	3.38323192595899e-05
Arl14ep	1320.00763060776	-0.338393063018575	0.0711436116930666	-4.75647855043538	1.96999159909515e-06	3.44717908210578e-05
Garnl3	1550.79250268537	0.6202903590331	0.130450416852663	4.7549894741516	1.98456756772879e-06	3.46908984975863e-05
Dcaf7	13243.0960182364	0.545560467694786	0.114763538651693	4.75377871843565	1.99649547950005e-06	3.48281897755303e-05
Pdxp	5087.82955184127	0.424829001051213	0.0893666890227121	4.75377353348343	1.9965467074922e-06	3.48281897755303e-05
3110039I08Rik	62.7655846671021	0.970027453292089	0.204183380323256	4.75076596222659	2.0264756600148e-06	3.5313795660485e-05
Usp36	798.205924047565	-0.699610534263592	0.14734784982776	-4.74801997505489	2.05417752748255e-06	3.57596306485262e-05
Nrp2	1542.90908959575	0.906826991999211	0.19100522198797	4.74765549633153	2.05788166573392e-06	3.57872191633192e-05
Dnajb5	1625.52786737674	-0.312657443200726	0.0658638896600695	-4.74702366978907	2.0643180222682e-06	3.58622161769761e-05
Gpr149	43.2814779419535	-1.07988179230161	0.227793419143098	-4.74061891850894	2.13066351497626e-06	3.69767565404822e-05
Gfra1	412.740426902932	-0.892808904773189	0.188387350848726	-4.73921895897409	2.1454357368674e-06	3.71948951260195e-05
C3ar1	42.9489515221505	1.95690032423513	0.413145359408581	4.73659035414664	2.17343864409468e-06	3.76417281478798e-05
Jakmip3	654.667393340201	0.430789940420869	0.0909800065221212	4.73499570827273	2.19059734433122e-06	3.79000274143207e-05
Stxbp6	543.938910491725	-0.909632988615227	0.192156101556164	-4.73382308055078	2.20329797208927e-06	3.80807467315245e-05
Gm13031	13.7718114921471	1.71384811633789	0.362226020116633	4.73143292076601	2.22940489753039e-06	3.84925675866034e-05
BB123696	4.39975703744836	-2.37120818396653	0.501463925629288	-4.7285718129991	2.26104654405137e-06	3.89990111775806e-05
Prdm16	68.0552218649093	1.22146234909125	0.258339087454252	4.72813603674106	2.26590357637266e-06	3.90429059088048e-05
Akap13	853.913379634792	-0.711246348003294	0.150535705710305	-4.72476841721549	2.30377739547316e-06	3.96550306829356e-05
Ccdc135	41.4662917304264	1.04352518705827	0.220936730029178	4.72318562386824	2.32178750449264e-06	3.9924341956072e-05
Gfod1	1574.33058081496	-0.629564719822866	0.133381960257685	-4.72001400044344	2.35828411214448e-06	4.05106668541929e-05
Cd86	8.97659375065634	1.88034720744345	0.398466188987127	4.71896301220225	2.37049911828465e-06	4.06791139343034e-05
Myo1b	634.38378329919	-0.692865329345576	0.146893256886463	-4.7167946577773	2.39589282990859e-06	4.10731434780066e-05
Rnft1	758.652685006751	-0.686489942815405	0.14561329527589	-4.71447295739532	2.42337184736778e-06	4.14734884803206e-05
Elmo1	1988.67146424745	-0.654345072736913	0.138796901986249	-4.71440690226458	2.42415806763451e-06	4.14734884803206e-05
Pitpnm3	410.96904787258	0.780316559419979	0.165547930503041	4.7135385930158	2.43451590005251e-06	4.16085379436101e-05
5430416N02Rik	242.219876884015	-0.739763038605903	0.156957358445535	-4.71314658919038	2.43920591828554e-06	4.16465431103839e-05
Rps6ka3	2062.38975612787	-0.647697882676303	0.137496723592966	-4.71064230296639	2.46937307671758e-06	4.21190240135889e-05
H2-T24	3.42847092127725	3.5455075300401	0.75271625051844	4.71028429052528	2.47371492245139e-06	4.21282145300177e-05
Pigv	220.905256240932	0.534730162509981	0.113526323735439	4.71018654454195	2.47490162346189e-06	4.21282145300177e-05
Tmod3	735.189808026627	0.81721460595689	0.173561735810021	4.70849523452222	2.49552199116607e-06	4.24364394187616e-05
Xdh	26.5982490718135	-1.28696140054774	0.273347779242565	-4.70814653813488	2.49979373801855e-06	4.24663149498805e-05
Gpr50	16.6696046808711	1.50684105067584	0.32007057543353	4.70783997758884	2.50355509212454e-06	4.24874686287587e-05
Ptpro	3556.0238672427	0.734169004065594	0.156018421030236	4.70565590407631	2.53051031392352e-06	4.28676094059417e-05
Fut10	157.344697042268	0.61810957012823	0.131355778303781	4.70561385353565	2.53103201336752e-06	4.28676094059417e-05
Ttc7b	1715.35108239626	-0.506347084397107	0.107617225388992	-4.70507469939751	2.53773017632231e-06	4.29379877328441e-05
Park2	549.131740181215	0.797608727883539	0.169629874777232	4.70205339083698	2.57558127141944e-06	4.35176390658184e-05
Wdr35	1657.20425652781	0.391411514855999	0.0832448685833307	4.70192963863213	2.57714314022376e-06	4.35176390658184e-05
Spcs3	1536.28836932915	-0.716758250240938	0.152475616882988	-4.70080570843656	2.59136987551095e-06	4.37141575603177e-05
Gdf10	89.3316393628031	-1.19664743124374	0.254667752828956	-4.69885730702408	2.61621157540361e-06	4.40891703216221e-05
Glipr1	22.3280666138739	1.58162035309665	0.336715182416618	4.69720534056499	2.63745269301686e-06	4.44028177211193e-05
Palm2	2216.53916564434	0.834360685430183	0.177647757245085	4.69671387001577	2.64380394139803e-06	4.44654117076167e-05
Cat	1920.8831011557	0.677378116616279	0.144233024503202	4.69641483945475	2.64767547773526e-06	4.44862170318782e-05
R74862	411.631713820687	0.563623384308978	0.120019465742151	4.69609976034941	2.65176068079361e-06	4.45105674511738e-05
Tnfrsf22	40.1958123597342	1.10571389837629	0.235489445788636	4.69538621857696	2.66103458301282e-06	4.46218768309379e-05
Cdh6	478.783532925718	0.927997756821441	0.197663057538875	4.69484671731808	2.6680671372652e-06	4.46954183331946e-05
1700001L19Rik	781.689668229231	0.899210681272983	0.191557811793524	4.69420000601293	2.67652071274807e-06	4.47925953968919e-05
Ptprc	72.8650841441461	1.85340348890244	0.394885953234638	4.69351587140697	2.68549144990284e-06	4.48918581971134e-05
Hlf	95.8970240018451	-0.99595579239867	0.21220607439673	-4.69334252202735	2.6877690771812e-06	4.48918581971134e-05
4933417D19Rik	14.2906121888754	-1.34912202837349	0.287534997182768	-4.69202720222589	2.70511148713677e-06	4.51368701302287e-05
Mir221	5.4260472573146	-2.03057625168541	0.433058639572523	-4.68891754172095	2.74654026216823e-06	4.57829011519968e-05
Pax6	158.572330065804	0.750928942447955	0.160184582964159	4.68789772743595	2.76025893078127e-06	4.59662054291642e-05
Hibadh	777.44814597906	0.549174561145506	0.117159757831226	4.68739925134206	2.76698839544417e-06	4.60328729512023e-05
Impg1	3.87081044347736	-2.97828545355788	0.636614985166577	-4.67831503020398	2.89241924852332e-06	4.80722356600048e-05
Stbd1	121.533019815207	-0.873684939516975	0.186809884552426	-4.67686676007652	2.91291387169937e-06	4.83652543141745e-05
2010002M12Rik	17.571846373594	-1.28861290428249	0.275639034354932	-4.67500151891835	2.93951443902258e-06	4.87589791918814e-05
Hapln4	9.54454458246742	-1.56436688493798	0.334733264864151	-4.67347302806271	2.96148613481474e-06	4.90752255863412e-05
Reep5	13323.8901399753	0.372771785177503	0.0797774379359615	4.67264673850184	2.97342937511157e-06	4.92248317922881e-05
Spata5l1	49.5068062465081	-0.930555854986368	0.199423912875824	-4.66622002129605	3.06791189348813e-06	5.07392362717341e-05
Helz2	39.2530195799896	-1.13857406343669	0.244074268245932	-4.66486726199848	3.08816318324731e-06	5.10241913036342e-05
Them6	53.3517291310099	-1.15120241424216	0.246864503394434	-4.66329666036591	3.1118365303276e-06	5.1365074927773e-05
Armc2	277.479204980713	0.644455769250324	0.138250398074056	4.66151112928522	3.13896090657363e-06	5.17622010433617e-05
Mnd1	57.4581188583455	0.952479355012717	0.204409392719207	4.65966530374226	3.16723956811577e-06	5.21775681436127e-05
Stxbp2	318.835050994641	-0.540092093190621	0.115916064535821	-4.65933773160251	3.17228354647252e-06	5.22097270621198e-05
Magi2	1881.42429930345	0.538356673313087	0.115577846462212	4.65795729711146	3.19362434823042e-06	5.25097767713913e-05
Lrrc9	26.9177683890948	1.27546723193497	0.274056329551652	4.65403311071706	3.25504498272912e-06	5.34675968661128e-05
Nefh	282.282531769394	-0.936222760998304	0.201362472724792	-4.64944012819045	3.32837280901551e-06	5.46189535986743e-05
Frmd4b	444.920157179382	0.838579040079295	0.180403818444531	4.64834418312012	3.34610245527513e-06	5.48565884075494e-05
Tmem29	1107.24373186869	0.458818040722537	0.0987482872698013	4.64633922681563	3.37877229962207e-06	5.53384568878935e-05
Pptc7	825.685866036866	-0.372308483799365	0.0801542216899928	-4.64490174003958	3.40238352932542e-06	5.56711708102608e-05
Fli1	10.2779982543053	2.03233433409221	0.437742554527406	4.64276162569195	3.43782901996871e-06	5.61966900592368e-05
Zeb2	8216.6773004043	0.641691604624874	0.138294303332727	4.64004365444473	3.48335585950095e-06	5.68858288622176e-05
H2-DMa	614.599506326205	0.752190158264124	0.162132738188395	4.63934777558678	3.49510466724727e-06	5.70225482233211e-05
Rnf150	1746.93681409174	0.659562847334165	0.142208186293853	4.63800899598896	3.51781478645561e-06	5.73376645599318e-05
Gm5797	16.3512431578242	-1.36064842924456	0.293890849851548	-4.62977472735834	3.66063758599326e-06	5.955193665054e-05
2900008C10Rik	69.4414326257209	0.877702134446744	0.189577909306567	4.6297700911313	3.66071954537845e-06	5.955193665054e-05
Rnf43	28.6412292822702	-1.53883778150861	0.332466119605184	-4.62855518431785	3.68225745187476e-06	5.98446576827308e-05
Scube2	27.0600765133174	1.22608296226197	0.265012746721108	4.62650562069854	3.71886779747609e-06	6.03815400270973e-05
Cyb5	1654.31874050784	0.44046659350352	0.0952205685241262	4.62575051095098	3.73244370980364e-06	6.05437507048455e-05
Gtpbp10	323.478481601402	-0.538470555390644	0.116567080407149	-4.61940501134505	3.84842009987264e-06	6.23650881059975e-05
Ms4a7	43.6165297727455	2.2949351252573	0.49691220626448	4.61839153139222	3.86726042189572e-06	6.26103159004134e-05
Abca6	132.613850548481	-1.04446961462757	0.226270881887457	-4.61601424767977	3.91180102787156e-06	6.32707587707272e-05
Rab3d	1288.27195833051	0.502831025921245	0.108941762683963	4.61559473183798	3.91971191414426e-06	6.33380434279808e-05
Me1	1618.0417308309	0.62908791511917	0.136399299789171	4.61210516543366	3.98611219681513e-06	6.43494173569983e-05
A3galt2	15.9746722608534	-1.44401439545085	0.313178779775751	-4.61083090139384	4.01062684081072e-06	6.46833283991689e-05
Tspan12	539.447853658985	-0.580588734366793	0.125945029754599	-4.60985824925413	4.02943616432084e-06	6.49246746858031e-05
Mycl	1397.12159266658	0.721891916199536	0.156631744870862	4.60884807734673	4.04906053696265e-06	6.51786808647772e-05
Myo7a	78.8618887963694	-2.85119730247961	0.618687963650945	-4.60845768786964	4.05666905381768e-06	6.52301169075105e-05
1110038B12Rik	305.785404846872	-0.685682677905603	0.148793367117437	-4.60828793103674	4.05998181154764e-06	6.52301169075105e-05
Stim2	1390.60349358411	0.311419981399444	0.0676148941834969	4.60578967341568	4.10903546853527e-06	6.59554875681431e-05
Bambi	147.676190253322	-0.751935990853355	0.163427749719847	-4.60103007073369	4.2040672363247e-06	6.74167895086219e-05
Rassf4	58.4371443935841	1.66317376725056	0.361615373455916	4.5992894366072	4.2393444185214e-06	6.7917997961245e-05
Pde2a	5312.83472037084	-0.776283352965359	0.168824064245825	-4.59817950973511	4.26198706169196e-06	6.82160317760477e-05
Necab3	128.123795194791	-1.05964889037795	0.230491471592013	-4.59734532934738	4.27908066893556e-06	6.83647265895591e-05
Plcxd2	4983.59249717438	-0.743715594170386	0.161771164703973	-4.59733102330889	4.27937439329409e-06	6.83647265895591e-05
Parp8	1731.96434688172	0.464836119160138	0.1011357693412	4.59615942201349	4.30349480587951e-06	6.86850787259749e-05
G2e3	866.887574064572	-0.645802917924521	0.140542436922593	-4.59507414319427	4.32595423017758e-06	6.89783410111225e-05
Aldh9a1	784.384396455645	0.44370055782451	0.096583324611109	4.59396650106074	4.34899223624968e-06	6.92802668880302e-05
D8Ertd82e	283.20361351204	-1.34221280296027	0.292351732245184	-4.59108893473089	4.40939383837654e-06	7.0176271776462e-05
A330076H08Rik	429.072780508162	0.748796316831913	0.163166020061273	4.58916823828098	4.45015663934139e-06	7.07583286364583e-05
Mybpc1	11.9838078696531	-1.37350036773035	0.299449449910419	-4.58675201487675	4.50194890183176e-06	7.1514495913764e-05
Vwa5b1	40.6442812910158	1.29188418395951	0.282001104347714	4.5811316482172	4.62466592639323e-06	7.3394839128831e-05
Ppp1r15a	1475.88434051643	-0.729783206934727	0.15938409697799	-4.57877053465068	4.67716949829213e-06	7.41013609681678e-05
Slc30a10	316.168103955025	0.897645004036433	0.196046501548255	4.57873513144782	4.67796107971496e-06	7.41013609681678e-05
Rnd3	652.671436396574	-0.785047691103869	0.17151158200511	-4.57722844093688	4.71176842201259e-06	7.45669368079706e-05
Unc93b1	35.6288700335643	1.5069744443785	0.329446963714841	4.57425507094031	4.77917322185789e-06	7.55628455283637e-05
Ccdc24	48.6251255965306	-0.938906735690833	0.205314984776992	-4.57300638192897	4.80775489457917e-06	7.59436381196107e-05
Ier2	890.129943879941	-0.969263169302281	0.211996320443657	-4.57207543637479	4.82917007972968e-06	7.62106223984256e-05
Ano5	98.6328669190382	0.909523999803625	0.199125157549913	4.56759964935943	4.93341159023326e-06	7.77829954366749e-05
Sytl1	13.9006888662133	-1.35560062767261	0.296831980006575	-4.56689547953218	4.95000671126067e-06	7.79718407895034e-05
Cdh22	260.166035377604	-0.819940126556388	0.179564849106706	-4.56626188608408	4.96498424496012e-06	7.81348778754861e-05
Ankrd10	1750.46545981549	0.376691851019824	0.0825003648026141	4.56594164063489	4.9725710388136e-06	7.81814102061513e-05
Deaf1	3337.86827716862	0.493640995500263	0.108150819115295	4.56437592926609	5.00982372801268e-06	7.86938450895089e-05
Lcp1	115.740949252044	1.6491614802912	0.361428276090994	4.56290110482669	5.04515829443755e-06	7.91752257991379e-05
Hrh3	190.445883729089	1.01301563092452	0.222029044063558	4.5625365600121	5.05392895352634e-06	7.9239224056867e-05
Otogl	208.607815158329	0.879947635232748	0.192897216753443	4.56174355463863	5.07305848883474e-06	7.94653670152722e-05
Pdia5	67.7642871268489	-0.902207555685582	0.197990460319337	-4.55682336527941	5.19330613656104e-06	8.12735564615104e-05
Foxa1	3.04175724869552	-4.40079575223943	0.96648952202389	-4.55338175112741	5.2790350274781e-06	8.25386902536993e-05
Prkra	1317.84333782505	0.428848960993446	0.0942229244749553	4.55142910690949	5.32827517055508e-06	8.32315028029538e-05
Dbndd1	770.354799442627	0.526588862745008	0.115705106325173	4.55112898185414	5.33588235231413e-06	8.32732988920299e-05
Mblac2	2989.90484967089	0.395939101256843	0.0870055790480925	4.550732327613	5.34595218524212e-06	8.33534151431195e-05
Paqr5	7.48772667063945	-1.99505313292581	0.438522518051682	-4.54948845452603	5.37764842832389e-06	8.37702687829126e-05
6330419J24Rik	1251.62378065379	0.384815535532288	0.0845932917348466	4.54900770073439	5.38994708879264e-06	8.38844668583894e-05
Eml2	1950.20522109817	0.670447125638694	0.147412277150067	4.54810914396345	5.41300623792854e-06	8.41657673422296e-05
Anxa11	50.9231718791244	-1.29931243704992	0.285991668612672	-4.54318282540466	5.54111535086506e-06	8.607844877158e-05
Pawr	36.7674047595817	-1.08709556023513	0.2393035877512	-4.5427466025514	5.55259818377866e-06	8.61775486500795e-05
Fezf2	462.839558414244	0.818465749380408	0.180195203052599	4.54210620213624	5.56949692408204e-06	8.63476990047937e-05
D930020B18Rik	13.1950713248511	-1.24086321941592	0.273200914925015	-4.54194386485309	5.57378845879576e-06	8.63476990047937e-05
Asb2	25.7864144960809	1.55192367492077	0.341726956009649	4.54141427133116	5.58781076762934e-06	8.64855844383034e-05
Ophn1	1503.60842591714	0.46442998224656	0.102299870863819	4.53988825523353	5.62840494505451e-06	8.69619324846809e-05
Iyd	168.284056680041	-0.878609681035679	0.193531895315478	-4.5398701831729	5.628887374497e-06	8.69619324846809e-05
Cox20	278.606982237491	0.529799881226503	0.116722925246071	4.53895308149276	5.65342122897446e-06	8.72611251119404e-05
Megf11	205.218170893867	-0.767354558086448	0.169119218902713	-4.53735869326522	5.69631737381275e-06	8.78286370289875e-05
Gng2	38865.3282912565	0.51798895649781	0.114164882191986	4.53720046438387	5.70059138835546e-06	8.78286370289875e-05
Armc3	24.9443478969457	1.19301145399576	0.263047273218851	4.53535001293547	5.7508034421648e-06	8.84451756578202e-05
Gng4	7840.80089126105	0.640925339634487	0.141318044321592	4.53533972049571	5.75108390810651e-06	8.84451756578202e-05
Mrpl18	663.347445008701	-0.460679745216134	0.101603864459732	-4.5340770025407	5.78559211055541e-06	8.88949120826557e-05
Kcnab3	80.9290389510375	-0.86531338062504	0.190866827601972	-4.53359754283515	5.79874687176852e-06	8.9016036069712e-05
Rai14	160.125584444069	-0.680950964612492	0.150245002118864	-4.53227032519703	5.83531073336284e-06	8.94959646172252e-05
Rufy4	3.48235934937329	-2.6856220260116	0.593269229804554	-4.52681833321501	5.98783725677302e-06	9.17519237004257e-05
Tmem91	118.988100336696	-0.824456503155819	0.1822569580142	-4.52359411755126	6.07982650162731e-06	9.30770175036072e-05
Itgb8	1271.01813161063	-0.746356946814412	0.165020360779192	-4.52281732563344	6.10219026468103e-06	9.33347688490977e-05
Tchh	60.6655623413252	1.02850432352435	0.227491219453569	4.52107261983476	6.15270749378376e-06	9.40222794027444e-05
Serping1	11.6599740391928	1.53833543570276	0.340843993373712	4.51331244090923	6.3822892284811e-06	9.74424375335731e-05
Erc2	8437.28414133591	0.398893040544096	0.0884364697639445	4.51050388610972	6.46738164969925e-06	9.86523997622597e-05
Slc41a2	2563.20001444463	0.475249515249648	0.105382712367772	4.50974836926849	6.4904565997438e-06	9.89150272051207e-05
Adamts3	710.66292449923	-0.872968344933132	0.193633225824325	-4.50836028381377	6.53305687541658e-06	9.947448007059e-05
Hpcal4	6822.61377070199	0.833914444168113	0.185014854715355	4.50728372838542	6.5662803617295e-06	9.98902794487966e-05
Slc7a7	27.1940218556206	1.37639373013568	0.305390294017469	4.50699893578459	6.57509632156806e-06	9.99343622736258e-05
Ybx3	668.82726685043	-0.697328655284247	0.154788461410485	-4.50504287548278	6.63595427291376e-06	0.000100768636557933
Tesc	136.735333572877	-0.765447309786373	0.169980620577042	-4.50314457723399	6.69553009246849e-06	0.000101581959695798
Acat3	22.5511794835402	1.66270967225611	0.36950162099665	4.49987111767281	6.7994674879336e-06	0.000103066254938283
1700029H14Rik	5.39609003395151	-2.07958989369521	0.462238037238252	-4.49895881810204	6.82870830213485e-06	0.000103416653264439
Baat	6.32677554757517	-1.60931796950197	0.357735552874792	-4.49862463087427	6.83944966442625e-06	0.000103486511678765
St6gal1	401.365518498306	0.680331383533299	0.151281221499334	4.49713042233927	6.88767413260303e-06	0.00010412288755876
Nub1	3834.03247745181	0.302431710506023	0.0673116316051594	4.49300816655351	7.02240906129172e-06	0.000106064757968669
Kctd8	173.413036235535	-0.790723105952763	0.176073765564749	-4.49086269846365	7.09352693338425e-06	0.000107043159782955
Zbtb20	914.11428362133	0.81269907562718	0.181031713523795	4.48926356497398	7.14698244220443e-06	0.000107753522784879
Adam8	53.6482210576117	-0.806376278101246	0.179912236155145	-4.48205355752388	7.39281834264197e-06	0.000111360508950805
Atp7a	851.862170897038	0.62724113820627	0.139974331102677	4.48111545356241	7.42539270544701e-06	0.000111751498417271
Aadat	18.1523527919671	-1.24092283042642	0.27699365185109	-4.4799684835143	7.46540616192801e-06	0.000112253649555046
Gnptab	4832.77214080583	0.294738215526125	0.0658094254771244	4.47866264428302	7.51121296059139e-06	0.000112841941327888
Capn11	30.730722225308	-2.60496873127846	0.581886666279855	-4.47676305754292	7.57832760308729e-06	0.00011374901324954
March11	66.8911658966226	-0.929472054133734	0.207726860769877	-4.47449140996464	7.65934055995505e-06	0.000114862899374246
Serpina10	9.36201157596743	1.57255662127069	0.351526505530851	4.47350796178492	7.6946691673972e-06	0.000115290313718429
Dtd2	282.233240832965	0.505364638756366	0.112990286444183	4.47263791127759	7.72605400955348e-06	0.000115632104663073
Pcdhb18	575.607436916074	-0.579532929178523	0.129577063855843	-4.47249622682658	7.73117648730362e-06	0.000115632104663073
Rrm2	125.136234871068	0.827418769690617	0.18504034124422	4.47155881861769	7.76514956513647e-06	0.000116037447395482
Car6	13.4379510944851	-1.56344981974291	0.349695819017666	-4.47088507988118	7.78965497319532e-06	0.000116300719608644
Mchr1	118.456077103981	-0.839110734239341	0.187753180227692	-4.46922248252591	7.85044416698713e-06	0.000117088605464251
Rimbp3	75.6109068483183	0.720687336322109	0.16126139115067	4.46906312279518	7.85629456301056e-06	0.000117088605464251
Enox2	583.043175961975	-0.497129251661878	0.111277275780973	-4.46748222557475	7.91455850328029e-06	0.000117852940816923
Mmab	1011.34073941353	0.512317678074447	0.114709737898032	4.4662091245458	7.9617786681018e-06	0.000118451625189046
Cmas	3368.71610903315	0.375715065541556	0.0841710500148893	4.46370890555714	8.05529844745898e-06	0.000119678637231268
Zfp663	21.237606201077	1.20852631620161	0.270749921781895	4.46362572608664	8.05842772308135e-06	0.000119678637231268
Cog5	1331.49573224309	-0.468367642237392	0.104988011934467	-4.46115355084296	8.15196516526788e-06	0.000120961409297639
Laptm4a	4588.59838421724	0.520256574662091	0.116689407297917	4.45847302432376	8.25455827954976e-06	0.000122376181833606
Rasgrf1	1208.60712266302	-0.819463178504954	0.183829716805355	-4.4577296464675	8.28322781489932e-06	0.000122690306129872
C330022C24Rik	7.47780462236876	-1.61718481244479	0.362797012854118	-4.45754721000162	8.29027829528507e-06	0.000122690306129872
Fcgbp	24.1921195820031	1.2424338588121	0.278760034922713	4.45700137452116	8.31140704618404e-06	0.000122810938383494
Vmn2r53	3.80418386091513	-2.31485339273364	0.519379334703509	-4.4569609109594	8.31297539810102e-06	0.000122810938383494
Cpne5	520.617494863619	0.83513182240547	0.1873905332914	4.45663827161859	8.32549089736279e-06	0.000122888321060199
Prom1	83.8230701519675	-0.848647889635964	0.190593101007646	-4.45266846044925	8.48096540845938e-06	0.000125073870643882
Sntg2	58.2609449005475	-0.97507874413488	0.219018703120487	-4.45203414248358	8.50606366888369e-06	0.000125334547218822
Bdnf	8603.65319262294	-0.959018483868198	0.215469899866329	-4.4508234535921	8.55416456041213e-06	0.000125831815847932
L3mbtl4	57.924002866686	-0.912515590326252	0.205022381756927	-4.45080962627837	8.55471542066953e-06	0.000125831815847932
Ptgs2	306.496233175018	-1.58247528646404	0.355588908790447	-4.45029427899454	8.5752703093335e-06	0.00012602438158695
Adamts18	187.958548367154	1.07800664595923	0.242433519977936	4.44660724332735	8.72371249397956e-06	0.000128094442759425
Grin2d	115.199650527713	0.907042892163709	0.204049137013215	4.44521797759413	8.78027954072246e-06	0.00012881303242801
Pak3	26101.8229564173	0.529929599446613	0.119301209329043	4.4419465856798	8.91486930563866e-06	0.000130674030464422
Ncam2	1937.78950479903	-0.686636782317371	0.15461381133897	-4.4409796018288	8.95502841285859e-06	0.000131148837623183
3110007F17Rik	55.5229314580133	1.15322632406556	0.259963527711278	4.43610815031852	9.15998409487693e-06	0.000134034221339768
Rab7l1	83.8499725858782	-0.75083955290165	0.16932020700832	-4.43443559494795	9.23138108465885e-06	0.000134961992203939
Nme6	170.095415312069	-0.875619191629384	0.197480231807652	-4.43395869862177	9.25183575135263e-06	0.00013514402984199
Nrgn	646.603520282603	-0.952904525328734	0.215082029697171	-4.43042371633928	9.40481124714181e-06	0.000137259846775485
Dpp10	2002.90955155209	-0.707968477348102	0.159890992019903	-4.42781965640676	9.51904385036684e-06	0.000138807059116835
Il10ra	28.8315756321892	1.40061531292217	0.316403564451694	4.4266736228125	9.56973598441033e-06	0.000139425851451901
Dock2	29.2215720616933	1.56535121282711	0.353689788111358	4.42577440865853	9.60969108161228e-06	0.000139887278969056
Cd24a	25350.6525978084	0.812179976977857	0.183591762997239	4.42383668917691	9.6963328311566e-06	0.000141026939006813
Cebpa	74.4453079946942	0.837702641562563	0.189379911179625	4.42339758396028	9.71607010354968e-06	0.000141192392227659
Avil	69.092707042173	-0.989248968009797	0.223680096541727	-4.42260613842883	9.75174162809892e-06	0.000141588915848735
Tbrg4	463.57130069206	-0.495587706175721	0.112067206284326	-4.42223664359372	9.76843806461378e-06	0.000141709488968272
Raver2	246.719264491951	-0.582456570151495	0.131774060655612	-4.4201155163134	9.86481543245232e-06	0.000142984784027802
Arid3b	63.9639681339943	-0.837078347858142	0.189442640732636	-4.4186374546981	9.93251014947644e-06	0.000143842509763344
Eya1	138.965121787069	-0.66055294230324	0.149575376267734	-4.41618773614767	1.00456845454316e-05	0.000145356837390024
Mcm4	240.265264843617	0.619100790293115	0.140236248870873	4.41469873358615	1.01150755962064e-05	0.000146235587771867
Wnt10b	28.9483499575339	-1.37699924154464	0.312140559823969	-4.4114716854522	1.02670382083201e-05	0.000148305566454827
Qpct	1136.90166225694	0.696251346413894	0.157868759110405	4.41031747089982	1.03219179793551e-05	0.00014897086068324
Slc4a7	2602.8122395988	-0.58525141828737	0.132749525633725	-4.4086893380106	1.03998077785623e-05	0.000149966826770968
Galnt10	253.135749326752	0.674460629449191	0.15306121499721	4.40647638568323	1.05065756596054e-05	0.000151377164324315
Cd180	8.21677917053274	2.37250455983932	0.538651797960912	4.40452360656834	1.06016596459067e-05	0.000152616900921381
Odf3l2	18.5276152660927	1.20528018156473	0.27383266639639	4.40152081716945	1.07494752339819e-05	0.000154612980239368
Slc15a3	13.1134345064306	1.56073980898293	0.354621982598003	4.40113666261962	1.07685270351407e-05	0.000154755189374797
Sh3d19	670.747205443421	-0.881507085420935	0.200302363394834	-4.40088209884632	1.07811696542923e-05	0.00015480512821631
Cep120	2327.24655740561	0.435143979846924	0.098891220477538	4.40022863248778	1.08136882318371e-05	0.000155140135499406
Shisa6	231.568191334614	-1.00510885860572	0.228525626265837	-4.39823259662137	1.09135982935995e-05	0.000156440594894501
Zfp882	598.982311164698	0.586907473122269	0.133503323252218	4.3962012242457	1.10161816489397e-05	0.000157777135983033
Plekhg4	105.757672254531	-0.779517343121389	0.177358731316426	-4.39514501110549	1.10698830440285e-05	0.000158411902611411
Lix1	2054.29452849072	0.678857701022724	0.154509073637267	4.39364294304452	1.11466838073884e-05	0.000159375870255343
Ptpdc1	712.997454584746	0.511662189919977	0.116482866202962	4.39259615254012	1.12005067156567e-05	0.00015988875940727
Sdc2	2719.13904978547	0.491267144550066	0.111840302799968	4.39257702501686	1.12014925014095e-05	0.00015988875940727
Chek1	93.7954348505108	-0.807215156051853	0.18380503851866	-4.39169221125516	1.12471842833364e-05	0.000160405366392245
Phf21a	884.995085310869	-0.412328315963952	0.0939207723935312	-4.39017168892396	1.13261199508882e-05	0.000161394819823374
Tmem141	164.363608189161	-0.792162548398668	0.180458217198152	-4.38972832990384	1.13492356824194e-05	0.000161587853063519
Gmfg	12.2955310731014	1.34662564312146	0.307011414455086	4.38623966314603	1.153270479526e-05	0.00016406171286669
5330426P16Rik	406.460442775132	0.792637868040303	0.180840562451048	4.38307566232471	1.17015449955562e-05	0.000166290733193743
Uros	951.550103082084	0.364723196859605	0.0832143692606321	4.38293530432552	1.17090892909725e-05	0.000166290733193743
Rabl6	1743.65296030344	-0.360212469785227	0.0822276248819927	-4.38067462488644	1.18312431160603e-05	0.000167884345594785
Frmd6	296.819191098275	-0.759430747343609	0.173394295459999	-4.37979084218953	1.18793274454961e-05	0.000168425124470736
Cyth4	49.4920068398624	1.77882358214926	0.406293504485023	4.37817381403603	1.19677890014782e-05	0.000169536984126645
Dbf4	330.411310307874	-0.700961331384083	0.160115865117068	-4.37783807914086	1.19862344532477e-05	0.000169655955555356
Gprasp1	29966.844571607	0.53183910134724	0.121504960179622	4.37709786136317	1.20269983115441e-05	0.000169987260346457
Gm6416	2.64367904466102	3.78372840219439	0.864447638322418	4.37704753238409	1.20297747313761e-05	0.000169987260346457
Frzb	134.153830346566	-0.805282003622761	0.183999107277157	-4.37655386234984	1.20570406981352e-05	0.000170230091328354
Nr4a3	917.960940375155	-0.96961546897816	0.221621557169395	-4.37509546166143	1.21379347659278e-05	0.00017122904465953
BC035044	8.55226318149562	2.25587372635205	0.515889953065611	4.3727808865957	1.22673830940402e-05	0.000172910710288784
Cd244	6.69122221794277	2.21262607212074	0.506188856203229	4.37114733958584	1.23595351363298e-05	0.000174064312186877
Mpeg1	63.3564035401706	1.90979100925854	0.437140335561976	4.36882816316496	1.24915004244227e-05	0.000175776230139002
Rcan2	3236.36904800357	-0.682085712370543	0.156134911805544	-4.36856628977405	1.25064856895864e-05	0.00017584056399197
Tspan33	367.415007946422	0.549090161871896	0.12571327490596	4.36779777062242	1.25505620119444e-05	0.000176313469329196
Oprl1	1889.6481014367	0.498558588414361	0.114166148439891	4.36695636339923	1.2598988599503e-05	0.000176846651281136
Dap	128.995111574679	0.643201962317084	0.147346249194141	4.36524150315907	1.26982387122601e-05	0.000178091743268459
Mrc2	24.2204092570855	-1.18471716583465	0.271560073685739	-4.36263383550874	1.28505923721508e-05	0.000180078923482272
Tmem8c	17.1834071311451	1.24043399634568	0.28458132859786	4.35880316694468	1.30775666380106e-05	0.000183107620439011
Zfp706	6624.16856979648	0.469164230438256	0.107641467372459	4.35858263446801	1.30907493600003e-05	0.000183140342744792
Paqr8	1334.04082898617	-0.408365881624618	0.0937192298186033	-4.35733288050941	1.3165695458388e-05	0.00018403636879995
Tnrc6a	1348.59979070254	0.546299825181131	0.125426725280781	4.35552968442875	1.32745525104284e-05	0.000185404543995942
Pld4	42.2630854805516	1.49653335947673	0.343616507855862	4.35524290964649	1.32919437440881e-05	0.000185494018233613
D430020J02Rik	116.5898321647	0.654650391559528	0.150388812017376	4.35305248294594	1.34254993720922e-05	0.000187203123366762
Gabrd	179.229302578334	-0.940100707127961	0.215977485206563	-4.3527718003978	1.34427055110704e-05	0.000187288387178164
Pcdhac1	67.1845202596397	-0.862334707773756	0.19838912116152	-4.34668344072999	1.38211465909248e-05	0.000192402210498232
Mkrn1	5595.14879516752	0.307837038696313	0.0708917205657888	4.34235530241694	1.4096332353789e-05	0.000196071390548666
AI504432	3463.01043888815	0.669241280882082	0.154139135267722	4.34179989215385	1.4132021702143e-05	0.000196406023425832
Sesn2	1289.36069989687	-0.726118658659819	0.167305597091422	-4.34007392031865	1.42434793950142e-05	0.000197792264033067
Macrod2	1450.81734503079	-0.497114472272668	0.114555846113954	-4.33949457086777	1.42810794820138e-05	0.000198151444645263
Ankra2	1814.91091732119	0.357006767851544	0.0822877721889268	4.33851541188747	1.43448426998231e-05	0.00019871746049567
Syt17	261.049057638379	-0.680997904115983	0.156965967084539	-4.33850672706146	1.43454094720018e-05	0.00019871746049567
Igip	1123.58819699968	0.563548910175149	0.12998322214784	4.33555116470481	1.45395349198467e-05	0.000201241464472566
Sh3rf3	1907.70452226745	-0.561875669923621	0.129620777158312	-4.33476547696807	1.45915599516001e-05	0.000201738653510683
Lmo3	665.922095532268	-0.767748228900134	0.177118930946042	-4.33464805144982	1.45993506212279e-05	0.000201738653510683
Isyna1	198.494587474059	-0.938185172332336	0.216452472630479	-4.33437031663748	1.46177929001487e-05	0.000201828332716199
A330074K22Rik	19.0375051592948	1.26241772647602	0.291339837247578	4.3331448881233	1.46994299686876e-05	0.000202789685009198
Brms1	316.695229835547	-0.624088041652187	0.144129556713323	-4.3300489912247	1.49076172215313e-05	0.000205493897471656
Hdac11	3590.94172331928	0.516501430164699	0.119337754247937	4.32806393433225	1.50425807745083e-05	0.000207185170439109
Serf1	1031.78704520512	0.440357534185168	0.101791115087048	4.32609008957797	1.51779366793362e-05	0.000208879086199894
Pisd	1405.38391624791	-0.410638090878269	0.0949634113844797	-4.32417164560057	1.53106057502356e-05	0.000210533296985732
Mamdc2	48.0514504918132	1.09826722048605	0.254214347696775	4.32024089291788	1.55858965523483e-05	0.000214144385014608
Efna4	45.1992938921584	0.929075222061748	0.215176137549185	4.31774281592623	1.57632952465025e-05	0.000216405693928814
4833423E24Rik	2.90357098780862	-2.59975445006938	0.602327976278552	-4.31617748544872	1.58754349564298e-05	0.000217768151644414
Hmha1	5.26824235727606	2.01096306961039	0.466621253486635	4.30962596449325	1.63530892657083e-05	0.000224138202386972
Pik3ap1	26.3865188649565	1.99845680924226	0.463937351598695	4.30760058951004	1.65035049789441e-05	0.000226016370701095
Il34	48.3180858990962	1.16290026417375	0.270052633559779	4.30619856894055	1.66083982230276e-05	0.000227268567580263
Rcc1	327.991435462964	-0.586304633625164	0.136194285550044	-4.30491361114948	1.67050910923938e-05	0.00022840661391592
6430573F11Rik	104.673369795687	-0.944944632487843	0.21952491347181	-4.30449837124835	1.67364523609213e-05	0.000228650270684884
St8sia5	448.695168220549	-0.648582224172676	0.150696972140987	-4.30388358145568	1.67829878222299e-05	0.000229100672891006
Plxnc1	6686.56317271903	1.02767843561671	0.23879910161286	4.30352722717851	1.68100178749869e-05	0.000229284298737503
Ctnnbip1	2052.55510671485	0.396734565371558	0.0922687601981979	4.29977128249424	1.70974469609568e-05	0.000233016537032055
Slc16a1	3075.95025572711	-0.696273499299956	0.161949900802979	-4.29931414497754	1.71327480764006e-05	0.000233309341950081
Fut7	26.2015991903326	-1.18729425409215	0.276180200881512	-4.29898396156766	1.71582887187802e-05	0.000233468866482936
Abi3bp	5.57361393225229	-1.8501941321331	0.430441619487654	-4.29836253830508	1.72064560388732e-05	0.000233935762216113
Atrnl1	4976.4810294129	-0.477740199734859	0.111220018169814	-4.2954515526641	1.74338108915439e-05	0.000236836146994859
Triqk	406.802328234589	0.623172442347002	0.145096201079247	4.29489151136799	1.74778785186522e-05	0.000237243936226657
Ntng2	368.79015865422	-1.00321667424404	0.233602902422931	-4.294538568822	1.75057047921302e-05	0.000237430788048121
Hn1	10501.0070600565	0.373369170873066	0.0869695272610263	4.29310337346613	1.76192921725378e-05	0.000238662511180369
Batf	4.84518005402152	2.27507822906133	0.529946452482094	4.29303417053858	1.76247868910293e-05	0.000238662511180369
Hk3	9.30438206747205	1.71652450373305	0.400011954643828	4.2911830104214	1.7772376594433e-05	0.000240468230107048
Rhbdd1	175.045774311763	-0.593957999769378	0.138441801935766	-4.29030821229099	1.78425317068635e-05	0.000241224171659004
A830018L16Rik	4614.35943742325	-0.658926178503905	0.153618088624872	-4.28937883814562	1.79173526036567e-05	0.000242041932852277
Polg	1185.28501461191	-0.495183222289451	0.115559617967524	-4.28508877927076	1.82666229050129e-05	0.000246562905175099
Cd83	60.355877805202	0.948242518571466	0.221324829763902	4.28439285182328	1.8323888944059e-05	0.00024713832964008
Abcb11	4.92675860842903	1.79218479653953	0.418419050137165	4.28322944653695	1.8420004627254e-05	0.000248236391169841
Nfil3	3264.40916997998	-0.692372073070403	0.161786715112515	-4.27953600880573	1.87283337165002e-05	0.000252190305531756
Osgin2	1059.46075506482	-0.508779224090503	0.118950386654861	-4.27723892623188	1.89225676393131e-05	0.000254602770643379
Gabra3	1007.69850716667	0.92340734367026	0.215979754363123	4.2754347341175	1.90764681127229e-05	0.000256469140566433
Tgif1	82.0034176505035	-0.813466942708034	0.190279691120186	-4.27511174691904	1.91041449551499e-05	0.000256636906692651
Dcun1d4	2900.61843266113	0.397279235438234	0.0929346467863364	4.27482375170164	1.91288555781205e-05	0.000256764590852259
Entpd1	59.933760555336	0.857320696799907	0.200606244552828	4.27364910155695	1.92299588043564e-05	0.000257916667490359
Erf	741.917549605972	-0.896563791923189	0.209864159933595	-4.27211483946034	1.93627808563803e-05	0.000259491998048284
Slc26a8	46.8197586041418	0.941181677822116	0.220444750156941	4.26946741599454	1.95940270003526e-05	0.000262382823099092
Sema4d	341.233102575086	0.766968650314055	0.179697289630703	4.26811473834834	1.97131930573962e-05	0.000263729095038387
Rint1	411.660032361045	-0.453976119927257	0.106368108669221	-4.26797209809393	1.97257993031791e-05	0.000263729095038387
Ctsb	11139.2769229453	0.308020409665677	0.0722220923564996	4.26490564888705	1.99986694137858e-05	0.000267165768766761
Lman1l	12.4021463837612	1.37943167226221	0.323547025676018	4.2634657802217	2.01280337441995e-05	0.000268681405379093
Serinc5	1114.02190664157	0.738350203257396	0.173193037892448	4.26316330172526	2.01553108774953e-05	0.000268833001166971
Bcl11a	1006.0539639152	0.664780221287121	0.155948116055418	4.26282944675575	2.01854583665625e-05	0.000269022612452861
Atp6v1g2	3551.1278885351	0.437025088330656	0.102542150998972	4.26190677758492	2.02689999334971e-05	0.000269842926879532
Sfxn1	3652.46286651021	0.328906975144346	0.0771756565944583	4.26179691444262	2.02789692177026e-05	0.000269842926879532
Rcl1	495.302413810935	0.578966876271233	0.135896808387383	4.26034196933343	2.04114360773886e-05	0.000271391739844712
2610203C20Rik	665.931490148151	0.689939706340352	0.162001529588439	4.25884686455201	2.05484174288685e-05	0.000272998093394078
Ncf2	28.9877350194836	1.28498305148213	0.301740073056727	4.25857606006662	2.05733219516169e-05	0.000273114083706763
Aoc3	3.36816856063328	-2.15121579695196	0.50533603626874	-4.2570005749757	2.07187822982175e-05	0.000274829032119168
Bcl2a1a	4.17226575415473	2.49761049623	0.586836864488071	4.25605589452666	2.08064711678645e-05	0.000275727063552559
Rasal1	407.249225111791	-0.933343329364186	0.219312665942275	-4.25576573680358	2.08334755782084e-05	0.000275727063552559
Asph	4296.02150310481	-0.539737239598387	0.126825579211558	-4.25574432976213	2.08354692107702e-05	0.000275727063552559
Ttc9	1921.80588284716	0.485215612847384	0.114044065863396	4.25463270862849	2.09392441854322e-05	0.000276883380826318
Arl4d	359.88599186787	-0.807132747520296	0.189795100965905	-4.25265322135627	2.11252579393961e-05	0.000279124495746982
Fuk	127.947259235151	-0.807290402368401	0.189868559324688	-4.25183824662555	2.12022979276826e-05	0.000279923379833345
Wdr52	71.9332667658069	0.849187871051608	0.199784840087566	4.25051205426502	2.13282356259003e-05	0.000281366083421057
Fam185a	615.5379546694	-0.407609425175994	0.0959167743179988	-4.24961564934013	2.14137629035074e-05	0.000282273848859192
Myo5b	1258.14302405824	-0.538539730491344	0.126757454566349	-4.24858429300072	2.15125700019798e-05	0.000283355114706264
Sybu	6112.53478853882	0.517718494391012	0.121904310769308	4.24692524098465	2.16724234178156e-05	0.000285238146401585
Xkr4	4334.11483027133	0.532153068270557	0.125372592022706	4.24457259505474	2.19010458367085e-05	0.000287815693918945
A330093E20Rik	24.0949023232571	0.99583423093959	0.234614287671895	4.24455919041151	2.19023550092292e-05	0.000287815693918945
Bcl2a1d	4.09000711641535	2.59012761381553	0.610266363034508	4.24425754179912	2.19318354083671e-05	0.000287910328417156
Hn1l	573.550604426624	-0.432501375170102	0.101905618700992	-4.2441366892549	2.19436570338078e-05	0.000287910328417156
1500004A13Rik	1474.27481415857	0.416919399435932	0.098263078063401	4.24288967588547	2.20659928224559e-05	0.000289290648136638
Nmd3	666.090298823619	-0.487878784457902	0.114994784871003	-4.24261661087663	2.20928678296937e-05	0.000289331064801276
Ttll5	757.879905003386	0.520229254976708	0.122622981319922	4.24251024870645	2.21033444032717e-05	0.000289331064801276
Lyz2	113.076613701276	1.64291794035356	0.387448834151534	4.24034813255111	2.23173386582324e-05	0.000291905949328359
Egr4	133.157401588329	-1.2316200004155	0.290470512755531	-4.24008615790916	2.2343400988008e-05	0.000292020641705498
Mcf2l	9248.72799338764	0.446965237242825	0.105447846759154	4.23873270986468	2.24785097056194e-05	0.000293559253587849
Gria4	5026.34140268473	-0.402335755094526	0.0949695515312444	-4.23647104369193	2.27060186998355e-05	0.000296301261024283
Ube2l6	186.403865633907	-0.779490389420398	0.184255213389909	-4.23049299436044	2.33179706193878e-05	0.000304051931952882
Suclg1	1581.98811601726	-0.526814230780489	0.124543306229409	-4.2299682474311	2.3372429976054e-05	0.000304526892419482
Bend7	143.996986934886	0.814575924629867	0.19262763024816	4.22875951690035	2.34983354564954e-05	0.000305931297238536
Ramp3	178.028694543559	-1.42154480905628	0.336252715043971	-4.22760841907368	2.36188374651873e-05	0.000307263243017838
Dync1i1	5413.72385080819	0.304324851126276	0.0719938961093131	4.22709240050294	2.36730472337821e-05	0.00030773138998433
Zbtb7b	50.3216643454493	-0.987083752112825	0.233597862694005	-4.22556842228402	2.38338390769751e-05	0.000309583235887539
Gcnt4	7.54450861936796	-1.69986485162766	0.402420017437345	-4.224106103003	2.3989101926276e-05	0.000311360472810989
Cd55	191.969930575582	0.621617933845745	0.147247018534487	4.22159945941557	2.42574877130558e-05	0.000314602102551966
Arl2bp	2284.21919487494	-0.34826457081946	0.0825099527797373	-4.22087953133559	2.43350967727486e-05	0.000315315290640045
Slc18a2	28.475299221453	-1.31979670942962	0.312692969052577	-4.2207431571885	2.43498246473184e-05	0.000315315290640045
Clk3	1591.9433685206	-0.437298735156452	0.103635949347369	-4.21956606670053	2.44772987728376e-05	0.00031672311653497
Ttc7	93.8486970340243	0.62233831787367	0.147505219475397	4.21909353504248	2.45286504113339e-05	0.00031714455654348
Abhd5	1431.5294655769	0.466499316131476	0.110584321383049	4.21849417979955	2.4593931856891e-05	0.000317540854004525
Hs3st4	97.463807984458	-0.84464239251703	0.200224967860046	-4.21846686526837	2.4596910875158e-05	0.000317540854004525
Ppfia3	2110.69957494328	-0.61660682636218	0.146282824289082	-4.2151690012742	2.4959121200851e-05	0.000321789816479893
Ypel3	957.06203028493	0.484841710601382	0.115024318467668	4.21512352396737	2.49641513436373e-05	0.000321789816479893
Tubb5	42394.3993488973	0.539212961958118	0.127951416171109	4.21420081226011	2.5066418929387e-05	0.000322861594234652
Tmprss5	9.21099987706487	1.44787257922212	0.343781182517215	4.21161091081423	2.5355600802924e-05	0.000326337404846169
Ggcx	385.760477568368	-0.49279727108344	0.117014548759037	-4.21141880483797	2.53771768211949e-05	0.000326366342576312
Clec4a1	10.4919925708313	1.90409964188878	0.45222804284099	4.21048555486926	2.54822417456595e-05	0.00032746813859757
Atp7b	38.8761937140339	-1.00124876580529	0.237928538868927	-4.20819112564244	2.57423095416475e-05	0.000330558660775863
Pth2r	30.0773219241436	-1.29707275546103	0.308239669465445	-4.2080007343326	2.5764002978233e-05	0.000330585831527691
Thrb	872.771474702592	-0.623391325003705	0.148184761728603	-4.20685175541485	2.58952886922675e-05	0.000332018105434798
Etnk2	183.042116668972	0.720537575657322	0.171340106469042	4.20530598764109	2.60729167601873e-05	0.000334041936580063
N4bp2	778.993512131508	0.579846918491066	0.138018314061908	4.20123171647333	2.65466707074037e-05	0.000339853738866731
Pcyt1b	3179.91826039063	0.6447041239828	0.153463355542869	4.20102976180987	2.65703655507678e-05	0.000339899388401716
Preb	1211.91493268435	-0.383699704365132	0.0913437878423861	-4.20061082891818	2.66195820646482e-05	0.00034027120571056
Col11a2	168.895681835388	-0.873575347067239	0.208001820264564	-4.19984472230152	2.67098090898236e-05	0.000341126313352496
Gfra2	105.943867108681	-0.953638285446363	0.227072951762308	-4.19970004373131	2.67268809999616e-05	0.000341126313352496
Lrrn3	5726.89284197887	-0.502077600274917	0.119563798370138	-4.19924431240147	2.67807246366923e-05	0.000341555374784883
Sdr42e1	194.524075603072	0.532719658521444	0.126872178119496	4.19886902248733	2.68251417312274e-05	0.00034186365530076
Shroom1	11.287992372563	1.39489338304077	0.332477582444979	4.19545093170788	2.72329240505851e-05	0.000346543425168525
Polr3gl	269.648106009288	0.484386945884382	0.115455384238844	4.19544700386018	2.7233396020291e-05	0.000346543425168525
Poln	21.6592568846385	-1.18866553846522	0.283429568863052	-4.19386566910936	2.74240422124602e-05	0.000348706609035846
Dis3l	767.453375259722	0.309940681501904	0.0739130144451338	4.19331674981238	2.74905162826185e-05	0.000349180351174828
Esrrg	315.467567553119	-0.964296352430053	0.229965784521877	-4.19321663192168	2.75026570568827e-05	0.000349180351174828
Pcdha5	194.728700431596	-0.79439733319325	0.189488934257539	-4.19231516766865	2.76122027697843e-05	0.000350307780593973
Slc6a9	242.802479014017	-0.783944214235277	0.187200466032807	-4.1877257618466	2.81763687801625e-05	0.000357196819235604
Arhgap12	2160.95516975061	0.404434008576593	0.0966219542119933	4.18573617015906	2.84243351858883e-05	0.000360070010464299
Dlk1	6.95878687584957	-1.64978317388033	0.394182909809513	-4.18532395196327	2.84759694718194e-05	0.000360453688531591
Adra2a	143.963163903681	-1.11825637455305	0.267432317872939	-4.18145564248651	2.89648763213218e-05	0.000366367716525723
B3gat1	2412.18654618749	-0.635623006577898	0.152019614755421	-4.18119074700017	2.89986461412506e-05	0.000366520313429011
Cacna2d2	221.62957321706	-0.813447673770549	0.194738692431674	-4.17712404049316	2.95218053071841e-05	0.00037285355603374
Tspan5	3033.3440964253	0.894417721500358	0.214224742447371	4.17513734073034	2.97806331103323e-05	0.000375841383184658
Pou2f1	750.184445881899	0.546431202496495	0.130945052004936	4.17298091168725	3.00640138109908e-05	0.000379123303021665
BC055402	3.43245567546564	-2.32497175632979	0.55717072106459	-4.17281753766144	3.00855872349302e-05	0.000379123303021665
Zfyve20	1801.05708334086	-0.289251994356574	0.0693235411141962	-4.1724930623508	3.01284776047467e-05	0.000379380665796982
Gm13178	2.98852314459688	-2.5715002572157	0.616340640055005	-4.17220622833861	3.01664407905232e-05	0.00037957564768165
Mpp5	1352.77797763348	-0.496587460509818	0.119060420282693	-4.17088617132996	3.03417403837624e-05	0.000381497116991967
Psme1	1498.44816245912	0.332941071699134	0.0798644203563838	4.16882849976787	3.06169249522927e-05	0.000384670680613404
Arap3	14.2091442856437	-1.34214925972859	0.322039097592856	-4.16765936111717	3.07743357112292e-05	0.000386272100989831
Mtbp	84.3336552760894	-0.715317338694709	0.171640090100336	-4.16754231646321	3.07901366772659e-05	0.000386272100989831
Tmem14a	594.943905358566	0.511593841145923	0.122772628817643	4.16700241798851	3.08631225388791e-05	0.000386900287447299
Nfia	983.050372064841	0.71263833700321	0.171114829445195	4.16467900131036	3.11790925422863e-05	0.000390571332840539
Nr2c2	5831.74363960197	0.474565572712609	0.11396452096605	4.16415186664964	3.12512061096798e-05	0.000391184482111232
Lrmp	17.3590898211904	1.8089896432351	0.434558127403667	4.16282547525501	3.14333621098564e-05	0.00039317315006447
Nrsn1	870.961768471692	-0.770769721638129	0.185176931787975	-4.16234200554014	3.15000085119508e-05	0.00039371513229667
Trim32	5475.47962279905	0.362909508317686	0.0872662096419912	4.15864868895439	3.20135817096846e-05	0.000399838269785307
Cacng3	267.524941862287	-0.763668353141507	0.183669113771956	-4.15784852149764	3.21258924679192e-05	0.000400944434747438
Olfr920	7.7655282845474	-1.5797550296203	0.380112578536526	-4.15601881869453	3.23841161666173e-05	0.000403868674733752
Nfam1	8.06342189085917	1.8718604612187	0.45071801384683	4.15306334273746	3.28053883047978e-05	0.000408820506948204
Glis2	127.546718179315	0.690416866067314	0.166266769062369	4.15246456018117	3.28913703477673e-05	0.000409589734286429
6330416G13Rik	189.822838035962	-0.698295080218858	0.16821010738236	-4.15132652303442	3.30553769631463e-05	0.000411328736477294
Frat2	359.360732599792	0.718342221479271	0.173080410535095	4.15033809579286	3.31984528535451e-05	0.000412804915231931
Atp8a2	1344.58529867596	0.600368590307609	0.144745810245589	4.14774416813148	3.35767294982921e-05	0.000417201364465166
Cmya5	43.0095491621604	-1.00557564457395	0.242459637935094	-4.14739398746088	3.3628109478404e-05	0.000417532541656124
Senp3	1968.4267119692	-0.290576047196464	0.0700929666162962	-4.14558066556291	3.3895364493516e-05	0.000420465400735149
Sp3os	161.714767082765	0.68010732018405	0.164061001826532	4.14545390197699	3.39141226934308e-05	0.000420465400735149
Tlr2	19.8671460600502	1.49408980788146	0.360645775997971	4.14281798739234	3.4306421078402e-05	0.000425017040594202
Ctnna3	70.9203780204547	0.996768478914362	0.240633204145505	4.1422732263983	3.43880325005104e-05	0.000425715774782712
Ncf1	30.9013194385395	1.51571072356844	0.366114798583946	4.13998759250073	3.47324606793186e-05	0.000429649488267352
Ndufaf4	866.183571275546	-0.547294356449655	0.132202205802192	-4.13982772169886	3.47566742255835e-05	0.000429649488267352
4933413G19Rik	4.57312246284815	1.95942307389308	0.473408777600354	4.13896650549053	3.4887387447637e-05	0.000430949834996927
Gabarapl1	14555.1543574611	0.276764833256104	0.0669323484327866	4.1349936127526	3.54964507926958e-05	0.000438152827547852
Col16a1	126.293688326282	0.822866257509098	0.199013820741145	4.13471915892409	3.55388966091576e-05	0.000438356324428222
Draxin	321.340302792234	0.803380798359196	0.194331110079514	4.13408227859387	3.56375794737109e-05	0.000439252676637287
Plk5	43.0694310608897	0.971497429297431	0.235053539742059	4.13308997755798	3.57918525063877e-05	0.000440832400746071
Aen	1638.47457893785	-0.401064554191804	0.0970546893713826	-4.13235627036133	3.59063295272537e-05	0.000441920029444027
Ncf4	8.53407603194721	1.7654098440556	0.427590062429454	4.128743858136	3.64750458623161e-05	0.000448592588806315
Olfm4	84.1164401840849	1.08736586726695	0.263455003241917	4.12733048864696	3.66998774561498e-05	0.000451029207223104
Neurl1b	1388.87968213337	-0.727949927368129	0.176392368644744	-4.1268788041178	3.67720061309053e-05	0.000451508932698658
Sbk3	17.9634462315731	-1.11948528812925	0.2712752002229	-4.12675131088058	3.67923896359916e-05	0.000451508932698658
Il10	2.62330625834454	2.84064330162537	0.688511094318902	4.1257770935927	3.69485011825413e-05	0.000453095418277699
Rap2a	5186.29569657542	-0.492525821992838	0.119433861220498	-4.12383738547595	3.72612004246134e-05	0.000456598425522512
Hnrnpdl	1696.88841860681	-0.4168490625184	0.101098177140883	-4.12321047032836	3.73628011421096e-05	0.000457511428633548
Zfp827	1118.66032588954	0.538673501727335	0.130670767545531	4.12237191106755	3.74991130973518e-05	0.000458847843305712
Grm2	100.707899583296	-0.816386896955913	0.198055388605683	-4.12201305252689	3.75575914623832e-05	0.000459230622327156
Btk	3.46500170308095	2.60289263822599	0.63157008182346	4.12130452840792	3.76733044371179e-05	0.000460312169844553
March1	3514.10183313634	-0.559542993671466	0.135799774787508	-4.12035288384688	3.78292553850673e-05	0.000461625447992017
Stmn2	21636.298978637	0.483635947501266	0.117378389192697	4.12031508378679	3.78354625145654e-05	0.000461625447992017
Shisa9	1127.84460438125	-0.586305805164095	0.142325428589567	-4.11947331530518	3.79739396609824e-05	0.000462980465787255
Nfatc3	429.196553057183	-0.458042795647984	0.111256191917232	-4.11700946935827	3.83820308621146e-05	0.000467618306737134
Abcb6	1216.41370417078	-0.418326874552237	0.101674075227089	-4.11439074924364	3.88203361874708e-05	0.000472590607962979
Slfn14	17.4414369788482	-1.37675129394048	0.334630971126629	-4.11423751156464	3.88461307504806e-05	0.000472590607962979
Cetn4	94.4616621484927	0.787165417167392	0.191353873385965	4.11366335699755	3.89429231716892e-05	0.000473427070321918
Btd	201.794100918906	0.561190476301903	0.136465811915633	4.11231552008679	3.91710451248937e-05	0.000475829555638917
1700003M02Rik	108.176971865401	-1.04074387756029	0.253089146680687	-4.11216320893189	3.91969034640373e-05	0.000475829555638917
Rfx5	568.719419771973	0.550721104466843	0.133932483996623	4.11193078805831	3.92363935061471e-05	0.000475966767776437
Capn5	1176.65025809884	0.621348391350616	0.151228463496216	4.10867357232764	3.97938068117144e-05	0.000482382068788664
Ccl17	15.3404165234215	-1.36844565046242	0.333101409964102	-4.10819531088113	3.98762826053134e-05	0.000483035084701092
Peli2	354.246709182926	-0.646671124808387	0.15742560854798	-4.10778862964531	3.99465420466956e-05	0.000483539289606094
3830406C13Rik	1572.41012521977	0.4414435064253	0.107534852725802	4.10512029575116	4.04104536630931e-05	0.000488804384351712
Clec4n	2.67063932052467	3.05289514590976	0.743815044700596	4.1043740210157	4.05411116977302e-05	0.00049002171443264
Tll1	245.030534513998	-0.949410524801	0.231329841618414	-4.10414202577064	4.05818111191489e-05	0.00049002171443264
Vgll4	311.414778231239	-0.58490572664397	0.142519188784789	-4.10404894689098	4.05981510417662e-05	0.00049002171443264
Asb11	2.35663855790881	-2.91195792049008	0.709571381927372	-4.10382661231415	4.06372069693587e-05	0.00049014276920328
Mill2	3.1371854256619	2.32165025656363	0.565756143091376	4.10362359280411	4.06729010968018e-05	0.00049022313199186
Wdr11	1408.19697728728	0.428865190301608	0.104524805492344	4.10299917116821	4.07828711267441e-05	0.000491125725553639
Ccl3	11.9232962499939	1.42269383906385	0.346755912899963	4.10286828900964	4.08059571806086e-05	0.000491125725553639
Parp1	1731.73666787422	-0.477872762482359	0.116524027023166	-4.10106631817104	4.11250667249161e-05	0.000494613872305508
Maats1	78.020265520003	0.701138819452042	0.171033187211156	4.09943140793151	4.14166391700768e-05	0.00049776609895083
Lingo4	16.5889430150339	1.24142787963238	0.302902559014074	4.09843972158287	4.15944526380852e-05	0.0004995476011712
Srms	5.44348171525503	-1.92557773601753	0.470390844462301	-4.09356975945957	4.24782197134225e-05	0.000509799017825766
Npc2	2790.03045712049	0.567634503278668	0.138719131569596	4.09196984479306	4.27724282585401e-05	0.000512817085581713
Oxtr	85.2167176147363	-0.793306148306689	0.19387363450961	-4.09187226676439	4.27904342996941e-05	0.000512817085581713
Gm4841	83.0958770858786	-0.942561365558237	0.230416699359138	-4.09068165710124	4.30107170705685e-05	0.000514857998037223
Clstn2	2019.26816060058	-0.751623702787045	0.183743116071277	-4.09062238008131	4.30217123789246e-05	0.000514857998037223
Gnb3	8.41754882521782	-1.38420973804699	0.338589187611615	-4.08816875639508	4.34791822742841e-05	0.000519964215214987
Adck3	426.578319215232	0.674817879915206	0.165084716613477	4.0877065652007	4.35658711487186e-05	0.000520632201144559
Arl4a	2735.36431703008	-0.394367114097886	0.0964979505882354	-4.08679263853678	4.3737770673998e-05	0.000522316828572228
Pkhd1l1	26.2094429173907	-1.04222685980334	0.255036951532199	-4.08657197924418	4.37793705697286e-05	0.000522444135293596
Areg	28.6575530264799	-1.32067748002899	0.323189342609836	-4.08638932634406	4.3813833681103e-05	0.000522486155041741
Ang	18.5522391455548	1.22428571905181	0.2998278897203	4.08329498698038	4.44016015983709e-05	0.000529121696958427
Dnm3	4479.04875114178	0.706418684669774	0.173088272419096	4.08126255347521	4.4791722138535e-05	0.000533394231333782
Fgf12	6030.60364511388	-0.324010252103126	0.0793932563462462	-4.08108027072308	4.48268692685457e-05	0.000533436585249234
Osbpl8	11598.0269589113	0.33961562662182	0.0832457462215586	4.07967544333055	4.50986221711436e-05	0.000535982983324247
Prr5	133.678625798147	0.749605719658692	0.183752096689876	4.07944036101979	4.51442493394426e-05	0.000535982983324247
Fbxo10	1300.20190584289	0.496754594256786	0.121771599840219	4.07939613923604	4.51528372443797e-05	0.000535982983324247
Habp4	2505.3197045874	0.258825850003817	0.0634482983752018	4.07931901456599	4.51678186231437e-05	0.000535982983324247
Pgrmc1	19196.1609863476	0.323919856226931	0.0794186847042724	4.07863536689251	4.5300822656971e-05	0.000537183772040458
Ovgp1	76.9194441600075	-0.805035498864394	0.197441606646314	-4.07733462332734	4.5554909363023e-05	0.000539817683862461
Impg2	65.5582477522644	0.950901146999781	0.233253385139537	4.07668744627621	4.56818316031446e-05	0.000540942081662482
Syde1	54.4762075347324	-0.875753793631686	0.214874424243471	-4.07565393934172	4.5885215223605e-05	0.000542969687642463
Tuba8	65.9110046903632	-1.08446070989985	0.266117041446967	-4.07512688403296	4.59892646558647e-05	0.00054381983401886
Iqcg	268.585160756176	0.492759281082798	0.120930151124084	4.07474295287359	4.60651998290143e-05	0.000544336574046701
Frmd4a	2263.80828735915	0.595376758218871	0.146136548782069	4.07411262398666	4.61901262596295e-05	0.000545431099314758
Vit	96.4127847940011	1.32640382957194	0.325593854907543	4.07379872064412	4.62524593040107e-05	0.000545785484142225
B230216N24Rik	1537.83698784484	-0.730255323412818	0.179315911911213	-4.07245132698764	4.65209238220503e-05	0.000548570055627892
Cep112	176.458356972332	0.650448962574733	0.159745080815706	4.07179338013633	4.66525542399446e-05	0.000549738332795328
Tiparp	4205.76402462515	-0.735171789656198	0.180635619459671	-4.06991595486699	4.70301008120434e-05	0.000553800754750464
Cep76	257.729076267539	-0.548200634322151	0.134723972675336	-4.06906524084788	4.72021298954153e-05	0.000555439139661312
Fam13b	1727.93477373534	0.617375024819925	0.151739899892179	4.06863999026367	4.72883464187277e-05	0.000556066168263674
Nudt1	171.194734295479	0.764954141339561	0.188183268216017	4.06494237554352	4.80443308151544e-05	0.000564562679293456
Tal1	124.47275183207	-0.770335223799476	0.18953392553922	-4.06436589970839	4.8163219892386e-05	0.000565566155148004
Coch	406.654821949856	-0.689625871971401	0.169695247977579	-4.06390797733192	4.82578579050409e-05	0.000566283661281808
Sdk2	209.403753148908	-0.80775884869756	0.198817099435796	-4.06282382647077	4.84826207452344e-05	0.000568526065211131
Ntm	2834.70729342549	-0.754095501299941	0.185636280616863	-4.06222048186975	4.86081337712425e-05	0.000569602322596253
Fat1	3630.41988587169	-0.686388491096196	0.169033878399462	-4.06065634649947	4.89349548891054e-05	0.000573034430136916
Micu2	1190.55277260585	0.451599790383153	0.111242707376343	4.05959007142244	4.91589425670892e-05	0.000575258422860616
Mthfd1l	445.928245520424	-0.688999471809089	0.169758290238925	-4.05870883147657	4.93447939314004e-05	0.000577033372801681
Trim72	13.965923615805	-1.27946415460274	0.315334443524221	-4.05748303389656	4.96044195311247e-05	0.000579667977994859
Ano10	1014.00943079637	0.46106041227603	0.113646359408177	4.05697476520181	4.97124508479298e-05	0.000580528661838273
S100pbp	646.358259293302	0.503452535668719	0.124126284750907	4.05597039079218	4.99265843873975e-05	0.000582626333079194
Npbwr1	42.8208527485878	-1.06326415520402	0.262253489814071	-4.05433748835082	5.02765879224503e-05	0.000586305568824928
Clec4a2	28.4377783017435	1.89512688459065	0.467553138752982	4.05328662672477	5.05030628492713e-05	0.000588540178932226
Lrch1	392.879059500646	0.420543567071602	0.103760882822724	4.05300683293241	5.05635250051046e-05	0.00058883840223186
Cxx1b	1602.98214113397	0.413071199683718	0.101939374314161	4.05212610399883	5.07542946843096e-05	0.000590652667153172
C1qtnf3	6.84623216896888	-1.45722525794478	0.359648002805031	-4.05180967662639	5.08230006369862e-05	0.000591044895837568
Tcp10a	3.12619039140023	-2.62406628224534	0.647863596796687	-4.05033759454897	5.11437947658338e-05	0.000594366220520213
Tmem120a	455.831588718282	-0.369330339055059	0.0911998170019279	-4.0496828962634	5.12870814208461e-05	0.000595621497161215
Irs4	69.0924344725659	-1.02914298554332	0.254213987336348	-4.0483334387957	5.15836235922231e-05	0.00059865365496789
Dgki	1737.52748646562	-0.420309829959875	0.103909889475745	-4.04494540491245	5.23353188740394e-05	0.000606675695934253
Gm14446	55.8125607651128	-1.01499872732467	0.250933304699693	-4.04489443336099	5.2346706678681e-05	0.000606675695934253
Acnat1	4.48839185830133	-1.76753891168487	0.437153844820403	-4.04328803835875	5.27068047568274e-05	0.000610430113253627
Cml2	7.38206913813545	-1.51674400549701	0.375246801900898	-4.04199049216035	5.29993821162203e-05	0.000613397920777585
Htr7	159.656819301416	-0.790135692342996	0.19555825107234	-4.04041091598182	5.3357630230681e-05	0.000616553354073041
Acsl3	5268.15133561048	0.585984945272133	0.145034999163973	4.04030026303949	5.33828121423732e-05	0.000616553354073041
H2afy	1772.29787019664	0.344068001078982	0.0851616177654427	4.04017690254118	5.34108992588392e-05	0.000616553354073041
Myo1f	23.5468283870269	1.48108527318529	0.366592070957045	4.04014541099781	5.34180715982979e-05	0.000616553354073041
Slc8a3	1104.66887933383	0.466759668393563	0.115574060800765	4.03861961031374	5.37666748526006e-05	0.000620153054344955
Lpin3	44.9251514303048	-0.81160119422853	0.201007412028536	-4.03766799461759	5.39851829541687e-05	0.000622248327210985
Trp53inp1	2138.10714772968	0.671857670729677	0.166538765643135	4.03424192640744	5.47788577263016e-05	0.000630965751409502
Ttc33	1371.51319412437	0.466030701358784	0.115523799425837	4.03406660510644	5.48197681104589e-05	0.000631006546907437
Pycard	15.3361548456295	1.67940652588574	0.416337671427594	4.03376067346287	5.48912251233979e-05	0.000631398656289985
2610307P16Rik	35.0082918238328	-0.92697440780162	0.230008837039648	-4.03016866539711	5.57368444210529e-05	0.00064047795257465
Smim18	579.63128872258	0.62138769780499	0.154187197550178	4.03008620480808	5.57564011775871e-05	0.00064047795257465
Cdt1	158.381971968362	-0.849586972990535	0.210845889371537	-4.02942156246383	5.59142685228229e-05	0.000641854750697748
Mob3a	794.853740249388	0.471151658705823	0.116961740450024	4.02825451205679	5.61924939434106e-05	0.000644610361907902
Smco3	203.891926768191	0.633039926140205	0.15722400734555	4.02635664125324	5.66477495407493e-05	0.000649391648842562
Snapc4	651.084821422028	-0.424753799074573	0.105514133889127	-4.02556305414873	5.68391468238893e-05	0.00065114371320773
Olfm3	972.923194715801	-1.03670022126976	0.257717315933964	-4.02262540067504	5.75529937979928e-05	0.00065870815217576
Cybb	32.6084738755845	1.7097884493788	0.425053501092991	4.02252527030648	5.75774743936647e-05	0.00065870815217576
Rab26	120.175580604113	0.797627158457997	0.198325803251783	4.02180223339559	5.77545406349045e-05	0.000660286508572104
Tmem206	499.893138140527	0.413974981306767	0.102946205723014	4.02127478520777	5.78840338840602e-05	0.000661319212561732
Cacna2d4	28.5518696641531	1.0451233222083	0.259921276904407	4.02092254491604	5.79706651126056e-05	0.000661758820078999
Ccnjl	37.4925473144583	-0.968119818104521	0.240777923615521	-4.02079976256642	5.80008914909937e-05	0.000661758820078999
Plcz1	10.6999029280662	1.3254885878887	0.329780337675834	4.01930751005423	5.83694471433113e-05	0.000665514169116782
Cftr	61.9063470134621	-0.937654526729397	0.233330689298173	-4.01856493695594	5.85536728006653e-05	0.000667164182801643
Fstl4	75.2332664596887	-0.890422514157415	0.221598749689049	-4.01817481103513	5.86506800160526e-05	0.000667818869016226
Numb	324.754747630948	-0.566463260637313	0.140991197312637	-4.01772076153965	5.87637738725832e-05	0.000668655718067681
Lrtm2	339.393363017585	0.673081829461151	0.167549779310542	4.01720510901801	5.88924621475511e-05	0.000669294125410464
Rabgap1l	13085.3420459346	0.35940962406121	0.0894681774458752	4.01717833448255	5.88991513893136e-05	0.000669294125410464
Fzd6	32.7995941478508	-1.07084711855066	0.266583766655691	-4.01692545643159	5.89623649193934e-05	0.000669561865520428
Dnah8	117.892410909203	0.741936398764995	0.184918041143626	4.01224452831366	6.01441520414771e-05	0.000682522951191117
Jph1	333.077969603741	-0.571241503094372	0.142381346416514	-4.01205296530416	6.01929902003797e-05	0.000682618423454407
Apobr	9.58210085735227	-1.30946790776272	0.326410013916492	-4.01172712825452	6.02761472120852e-05	0.000683102699210249
Cdh23	115.346644439639	-0.784542330961454	0.195570385328152	-4.01155997951865	6.03188475140573e-05	0.000683128141597835
St8sia3	5213.07612942832	0.394915026415295	0.0985451847262532	4.00745127742488	6.13775181719344e-05	0.000694651991857429
L3mbtl1	161.301419282856	0.727916063903066	0.181725470244204	4.00558085184695	6.18652676445031e-05	0.00069970322132959
1700028E10Rik	10.9873013470062	1.29934852948628	0.324556021439412	4.00346455975042	6.24215558454236e-05	0.00070518493402179
Rev3l	13258.9272746041	0.462413485854898	0.115504630822732	4.00341945219993	6.2433464192975e-05	0.00070518493402179
Lsamp	1716.5887299663	-0.559359373784011	0.139728516508844	-4.00318694966325	6.2494878746571e-05	0.000705406766386763
Fam181b	150.42010766782	0.778266352054492	0.194486565036399	4.00164583043993	6.29034070233078e-05	0.000709543708079877
Rgma	277.52836063406	-0.982141894233921	0.245483095958473	-4.00085346161702	6.31144352547843e-05	0.000710979365500052
Gas2l3	113.074782976351	-0.869080556610647	0.217223942090059	-4.0008506808625	6.31151770200657e-05	0.000710979365500052
Klhl35	5.41066780872632	1.88636406697041	0.471509215148087	4.00069395542559	6.31569968168943e-05	0.000710979365500052
Mesdc2	1892.12750383794	0.436116300307804	0.109041211569862	3.9995547924409	6.34617542874372e-05	0.000713934165821229
Pde6g	7.05290801759552	-1.46260731308541	0.365804711601672	-3.99832825192821	6.37914437244625e-05	0.00071697523898633
Pbx4	184.009313981493	0.726341012323203	0.181665483688544	3.99823344300492	6.38169953924229e-05	0.00071697523898633
Prkaa1	1151.29141885137	0.340456916948606	0.0851914414178104	3.99637465081591	6.43199140568e-05	0.000722144992528674
Clca1	54.4993523869475	1.02728086453149	0.257072031528437	3.9960817924211	6.43994916991379e-05	0.000722558017828334
Krt78	3.40931371682513	2.17265786081176	0.543737213195084	3.99578658235452	6.44798026638693e-05	0.000722978716986785
Irak2	61.3269664684163	-0.702918355521707	0.175978882756238	-3.99433355020996	6.48764789556126e-05	0.000726943744953202
4930507D10Rik	1.06759239456814	-5.75939313121944	1.44237491081554	-3.99299314487034	6.5244455397014e-05	NA
Lrrc58	8742.90631251717	0.452381416365097	0.113361746537291	3.99060027022682	6.5906278109417e-05	0.000737992978883034
Gm1141	17.4197218311615	-1.06867193455885	0.267870622403765	-3.98950778912971	6.62105451421098e-05	0.000740908724499447
Sik1	912.903266390717	-0.63722758050768	0.159740223782815	-3.98914916617409	6.6310714740031e-05	0.000741464815590915
Orai2	3002.80993340955	0.364649082310738	0.0914133007237658	3.98901559645725	6.63480597156149e-05	0.000741464815590915
Wnt11	7.50596498321827	-1.96934829958763	0.493961086076705	-3.98684907596511	6.69565873843489e-05	0.000747569545199701
Noxred1	37.7899244959249	-0.893902617610719	0.224218044406934	-3.98675592758437	6.69828687603428e-05	0.000747569545199701
Atf6b	998.761102567582	-0.583641648880571	0.146422667200728	-3.98600612895862	6.71947767343084e-05	0.00074943923377512
Ctsw	5.03480166630916	-1.63722542308241	0.410766271713235	-3.98578348766033	6.7257821635771e-05	0.000749647244977973
Atg4a	164.362319803274	-0.608395953669868	0.152717495692035	-3.98379996288532	6.78219684626344e-05	0.000755436516794224
Cd79b	4.19028214273644	2.33849024310746	0.587026293434927	3.98362095405303	6.78731011815782e-05	0.00075550770372586
Cdyl	250.436940795681	-0.751358713437381	0.188661735615058	-3.98257076872461	6.81738153538365e-05	0.000758355102809541
Vmn2r3	2.13107010925469	-3.09024255847504	0.776001516547075	-3.98226355565063	6.82620220002928e-05	0.000758836407832089
Mlh3	987.061961402593	0.394990368725936	0.0992020714614362	3.98167460524738	6.84314227549884e-05	0.000760219082000483
Arntl	670.924091677348	-0.416925995205493	0.104727063071672	-3.9810721601174	6.86051165126991e-05	0.000761355705319852
Ddx19b	1947.78434994571	-0.287448105559422	0.0722048721874157	-3.98100705466688	6.86239123236299e-05	0.000761355705319852
Nptx1	1015.90136185761	-0.766234390055649	0.192610572845528	-3.97815332115834	6.94525832666003e-05	0.000770043546316358
Ccm2l	3.11777462380542	2.11822253659888	0.532635113715063	3.97687362709632	6.98272491058878e-05	0.000773689585565631
Itgal	21.9560395446652	1.56049591373907	0.392465700096294	3.97613323497109	7.00448917435569e-05	0.000775592158676526
Kcna1	3446.32563727457	-0.580047204492242	0.145887981248703	-3.97597663308128	7.00910079470286e-05	0.000775594207204145
Ndfip1	12076.2546627243	0.36058384105857	0.0906954888602933	3.97576379585991	7.01537304089436e-05	0.000775779889774343
Klf11	386.998608457842	0.674711609925687	0.169713632369072	3.97558876389144	7.02053515675148e-05	0.000775842648278177
Micu1	1542.15321500808	-0.330831401783581	0.0832879451819291	-3.97214027865538	7.12297511947841e-05	0.000786648514503025
Cd69	15.5659228459834	2.27744380410418	0.573398847321445	3.9718318492319	7.13220582321247e-05	0.000787153121116116
Susd1	200.656921073784	-0.582639722821807	0.146768642305649	-3.96978342014262	7.19379913315534e-05	0.000793157132404408
Lrrtm2	3010.46631824521	-0.515219658067586	0.129787715775552	-3.96971049986409	7.19600098805847e-05	0.000793157132404408
Rimklb	4015.23187038738	0.270522543444116	0.0681556454604686	3.96918760898573	7.21180855744368e-05	0.000794380947821226
Pou3f2	1624.54955335785	0.521770430734324	0.131476480136504	3.96854578242892	7.23125658723484e-05	0.000796003903077232
Ablim1	2683.59861940607	0.505035727858654	0.127313926107586	3.9668537708269	7.28276438609396e-05	0.000801151527189463
Stap1	3.47138836046356	2.19063425989755	0.552425568270398	3.96548310889421	7.32474395328495e-05	0.000804780016193822
Stxbp4	519.139479056063	0.481274872262096	0.121370183201142	3.96534683864239	7.32893001742883e-05	0.000804780016193822
2610528A11Rik	6.96349311522908	-1.49502532678752	0.377032598475648	-3.96524155426334	7.33216578078823e-05	0.000804780016193822
Dusp27	3.638286401557	2.14049791042121	0.539826982309931	3.96515546752032	7.33481253655272e-05	0.000804780016193822
Cxcl16	8.50897662789114	1.61405019174196	0.407157066028881	3.96419545774865	7.36438953854944e-05	0.000807500530830817
Spi1	13.5143737184226	1.68082626449713	0.424161523818824	3.96270328662596	7.4105859537809e-05	0.000812038639945128
Col23a1	357.130350020638	-1.2652316619715	0.319386427220778	-3.96144467684879	7.44976443801164e-05	0.00081580234954776
Galns	386.951290049304	0.579019226368643	0.146204201182442	3.96034602074197	7.48412387051681e-05	0.000819033802187601
Slc36a4	992.772636591053	0.49237872960635	0.124338370181307	3.95999021772905	7.49528336197575e-05	0.000819723800844057
4930444P10Rik	15.6894213861973	1.13309093002405	0.286170940293417	3.95948983800474	7.51100402087998e-05	0.000820911416806339
AW822252	11.1935527210136	-1.43029851517636	0.361477485798164	-3.95681217052335	7.59566077384468e-05	0.000829626958778404
Scn1a	2407.2711610038	-0.699496251512367	0.176810471435684	-3.95619244625345	7.61538205792793e-05	0.000831243318876348
Gpr31b	6.15076059920318	1.98835979556973	0.502674868031464	3.95555839773011	7.63560928129075e-05	0.000832912779869997
Lgals9	24.0563927169794	1.21689725936725	0.30767057504041	3.95519545282295	7.64721069143694e-05	0.000833639765885114
Arl8a	4138.69738528987	0.374176115516821	0.0946079213285351	3.95501888491408	7.65286064908362e-05	0.000833717451099523
Sfxn5	1434.79759449221	-0.255365645463809	0.0645807884172375	-3.95420451998768	7.67897045520797e-05	0.000836022534536698
Mxi1	1532.37596076215	0.556060888781507	0.140662709198341	3.9531507103097	7.71288226447639e-05	0.000839173517512554
Car8	92.6750321312854	-0.943834708358419	0.238807433789534	-3.95228361772959	7.74089161930283e-05	0.000841678659906939
Fbxo2	341.172032806877	0.556288031839562	0.140845125670843	3.94964347676194	7.82676846063242e-05	0.000850357673427479
Cyba	46.138797744954	0.890623715916574	0.225510716907191	3.94936315280799	7.83593937117516e-05	0.000850357673427479
Neto2	4401.37108856916	-0.532316314173797	0.134786087760536	-3.94934167923563	7.83664230646991e-05	0.000850357673427479
Dusp18	997.537115302322	0.73305749361674	0.185621158660513	3.94921300409209	7.84085572383385e-05	0.000850357673427479
Gpr123	1070.42194107286	0.601663036300962	0.152364700699407	3.94883482551484	7.85325143440535e-05	0.000851155351228298
Tmem38b	142.362613056773	-0.618873054920235	0.156831433921131	-3.94610340189494	7.94333208523674e-05	0.000860366296288053
Ctps2	1536.16695587127	0.391281117859077	0.0992013111889302	3.94431397296631	8.0028749694786e-05	0.000866259914965485
Gfm2	836.955060056572	-0.358852148649958	0.0910088633476757	-3.94304615451637	8.04531646416223e-05	0.000870153009843685
Casd1	3227.82861178923	0.372020850169834	0.0943513220863996	3.94293203257042	8.04914723069902e-05	0.000870153009843685
Rag1	27.3376737064215	1.22620499994847	0.31101704041916	3.94256532791869	8.06146819341328e-05	0.000870927395482896
Kdsr	831.4700846467	0.407354764053212	0.103356174406435	3.94127168882376	8.10507588788125e-05	0.000875078717664723
Resp18	208.27674108617	0.915753536609051	0.232470403956222	3.93922633171619	8.17447873641426e-05	0.00088200797407726
Creg2	2579.58567187399	0.507943976019189	0.128991786422082	3.93780092599939	8.2231771778041e-05	0.000886695848176245
Rgs10	904.13557012388	-0.552611063201292	0.140402537196764	-3.93590510709111	8.28837208356744e-05	0.000893155398871218
C230029M16	27.8290865439873	-1.17388147675721	0.298302149563177	-3.93520958020651	8.31241265762148e-05	0.000895174745769109
Ablim3	1551.45609075528	0.454147832984805	0.115417269406895	3.93483432174903	8.32541065177282e-05	0.000895839294630679
Snx31	2.37974193228541	-2.77070819273884	0.704170905202685	-3.93470984425483	8.32972647504818e-05	0.000895839294630679
Fkbp11	28.5084759136969	-1.06224653641734	0.269977640811666	-3.93457226022043	8.33449918195426e-05	0.000895839294630679
Trim14	12.9708035891935	1.30891052680625	0.332697877177952	3.93423167562366	8.34632497531728e-05	0.000896539717132364
Fhit	91.8877418136936	0.768241531436435	0.195282084515159	3.9340092735276	8.35405578726815e-05	0.000896799656858296
Cst6	12.2987544845604	-1.17927058852935	0.299794519625436	-3.93359621784525	8.36843177538995e-05	0.000897772166195901
Cggbp1	3471.7157201549	0.405065989494899	0.103024567164058	3.93174172573678	8.43326410722544e-05	0.000904153001362595
Fyb	42.8722005300936	2.07145695885758	0.526923111698359	3.93123192524415	8.45116953901302e-05	0.000905497771800596
Atp6v1a	25603.6181310698	0.287320630384956	0.0731083870872857	3.93006386588611	8.49233016821942e-05	0.000909330927207059
St6galnac5	457.746920558404	-0.714279876718858	0.18176771291718	-3.92963010457369	8.50766343387931e-05	0.000910395467328809
Hist2h2bb	1506.77637795961	0.509339273722733	0.1296214081965	3.92943789771671	8.51446622029125e-05	0.000910546400226967
Capn1	59.8945710220321	-0.782157225125235	0.199137489098008	-3.92772465228929	8.57533071183272e-05	0.000916474901265869
Pcdhb15	146.430274867581	-0.767657582788117	0.195717420975177	-3.92227518104011	8.77167277332171e-05	0.00093678549998266
Fam71f2	6.71278134155123	-1.53978827867935	0.392588461349704	-3.92214349190402	8.776469625563e-05	0.00093678549998266
Gm20754	99.6985711132627	-0.766991541045601	0.195618624246517	-3.92085131975494	8.82366938516846e-05	0.000941228561199966
Wif1	35.9496389937906	-1.1345690541258	0.289494036811587	-3.91914481770213	8.88637112014999e-05	0.000946804826055547
Tmem192	206.022274342121	0.547318708356728	0.13965334731414	3.91912345019253	8.88715888486345e-05	0.000946804826055547
Psrc1	127.192996755688	-0.618498733498478	0.157859624034282	-3.91802994136208	8.92756191573432e-05	0.00095050952401696
Mir551b	1.8222501082665	-3.47663654176736	0.887577696297491	-3.91699403474204	8.96599665312501e-05	0.000954000122776742
Diap1	615.001618803058	0.558475171693597	0.142728746056417	3.91284297749555	9.1215850445252e-05	0.00096994386059101
Ms4a6b	9.22579756540165	1.90834407400955	0.487767260965823	3.91240705706829	9.13807120721366e-05	0.000971085402171239
Il33	14.3022097380645	-1.30733976222446	0.334419716253949	-3.90927836692409	9.25722428284086e-05	0.000983128863144973
Per1	933.958339177097	-0.576979253774146	0.147631418268075	-3.90824162324611	9.29703026173178e-05	0.000986735719670665
Adm2	3.64724558852912	-1.9961487943882	0.510865575440035	-3.90738560269757	9.33001912518371e-05	0.000989614968265403
Efnb1	370.081965474226	-0.724202988378739	0.185445192451096	-3.90521306487748	9.4142402400818e-05	0.00099792128495933
4930429B21Rik	251.775366423047	-0.469006339901299	0.120108810932426	-3.90484541692087	9.42856340381323e-05	0.000998812557319888
Grn	622.314226736679	0.834322386894204	0.213685478076302	3.90444121147197	9.44433455679019e-05	0.000999856008313224
Tvp23a	1593.22094989546	0.333353976531021	0.0854306604870542	3.90204142904333	9.53848266905428e-05	0.00100919059116322
Srd5a1	880.806110037095	-0.571237111870621	0.146416143278456	-3.90146263301197	9.56132224262087e-05	0.00101097362172133
Ctsz	104.519647428691	0.900797009279291	0.230975420594332	3.89996912641792	9.62049551857158e-05	0.00101613242342585
Thbs3	493.579243566854	0.488079047582433	0.125150798080619	3.89992756792509	9.62214701562206e-05	0.00101613242342585
Prmt8	2268.4260457133	-0.42632170346488	0.109366680413357	-3.89809493946032	9.69524077392953e-05	0.00102321147317859
Dok3	29.495508415485	-0.96362135354891	0.247230491871314	-3.89766386118135	9.71251018393966e-05	0.00102439379741415
2610203C22Rik	5.43179688774731	1.61022859295283	0.413282674587925	3.89619186083316	9.77169909865841e-05	0.00102999320212201
AW495222	11.1442611341477	1.35127714676751	0.346854571693445	3.89580318970622	9.78738424416069e-05	0.00103100293416655
Cckbr	77.0234249634532	-1.17396378124385	0.301388336697779	-3.89518650292384	9.81231993783927e-05	0.00103298525230894
Itga9	109.199193317331	-0.623454108755718	0.160063956369274	-3.8950312293755	9.81860786013463e-05	0.00103300319206376
Cib2	144.545941879967	-0.602974757062647	0.154828896632253	-3.89445878759197	9.84182221260475e-05	0.00103480080873004
Gng5	330.189027258728	-0.537443315499611	0.138036138229844	-3.89349718408317	9.880934994436e-05	0.00103826675990072
Mlip	535.244531164388	-0.71229740436265	0.182959656512647	-3.89319382173968	9.89330453728459e-05	0.00103892002746634
Eif4e3	380.344637173705	0.421217345127143	0.1082207542393	3.89220485560227	9.93373103408113e-05	0.00104251698099126
Cntnap1	183.605629812619	-0.645162775056779	0.16577789653513	-3.89172976941508	9.95320679027321e-05	0.00104391211093511
Nkain4	200.106569512578	0.520232296937887	0.13369202152298	3.89127407164283	9.97192159985351e-05	0.00104522574882139
Nup210l	48.1208813271453	-0.886849477779737	0.228224239792646	-3.88586890939144	0.000101964521217707	0.001068097335783
Thnsl1	1237.846478598	0.322754583168734	0.0830713330689848	3.88527030017334	0.000102216097827521	0.00107006883317763
Kdelr3	56.1978530577851	-0.787239679947423	0.202659546528784	-3.88454278829451	0.000102522636872049	0.00107261291587448
Lonrf3	445.855527925558	-0.731080380451809	0.188239731566193	-3.88377296529841	0.000102847948533606	0.0010748684370866
Tm7sf3	906.222445612722	0.278566966010082	0.0717282201013714	3.88364531583792	0.000102901984696673	0.0010748684370866
Focad	1082.1613171286	0.379492227007483	0.0977214809606799	3.88340642483896	0.000103003183278543	0.0010748684370866
Apol8	7.23763564830035	-1.47408027234476	0.379590482392573	-3.88334360507034	0.000103029810471528	0.0010748684370866
Id1	14.7086791037334	-1.18409566109032	0.30492147340958	-3.88328066190278	0.000103056496484852	0.0010748684370866
Chac1	683.74253633547	-0.837395533469329	0.215667622638257	-3.88280597349518	0.000103257960334631	0.00107630488778431
9530026P05Rik	13.0349378960271	-1.25035454738275	0.322395854823211	-3.8783207931392	0.000105179964220379	0.00109566247737527
Rpusd4	147.07261490303	-0.622831589336961	0.160616345379925	-3.87775968793028	0.000105422773064249	0.00109735994320525
Cgn	118.137155602642	0.648355538533506	0.167217984845981	3.87730745069487	0.00010561885598888	0.00109735994320525
Pex7	640.226804645075	0.464952365008637	0.119916993506902	3.87728504035482	0.000105628581702828	0.00109735994320525
Tnfaip8l2	5.70928217742712	1.97543176969666	0.509490690546228	3.87726764463308	0.000105636131738649	0.00109735994320525
Gpr35	30.0190842312784	-0.939567628194521	0.242331822154431	-3.87719458320155	0.000105667847190083	0.00109735994320525
Syn3	2195.65710180015	0.820011442608587	0.211619855505874	3.874926767379	0.000106656769927669	0.00110694911923702
Lmod3	9.10993133120743	-1.43912098135868	0.371627014071984	-3.87248753956279	0.000107730185151517	0.00111740289095117
Arfip2	1960.42555769611	-0.339128373952403	0.0875794777027549	-3.87223562925787	0.000107841620538546	0.00111787207146341
Bcl10	450.95673176878	0.389427697342177	0.100580067826385	3.87181780404426	0.000108026690102675	0.00111910349022931
Rrp36	499.026656754085	-0.67689371550283	0.174833785930166	-3.87164135296596	0.000108104936488522	0.00111922744178123
Neurl1a	1646.47558831973	0.52075006074455	0.134540048297343	3.87059516727433	0.000108569962073975	0.00112335317376296
Tbx6	14.2328886418532	-1.12618032125704	0.291088391855003	-3.86886029387944	0.000109345269045297	0.00113068231053208
Ier5l	18.3537023128894	-1.26103678013286	0.325984644611705	-3.86839319267611	0.000109554905226455	0.0011321567500942
1700021K19Rik	2514.11381820703	-0.438229776248829	0.113329048174923	-3.86687952741315	0.000110236850265861	0.0011385073110638
Asap2	539.349331309033	0.659209077860307	0.170522074840341	3.86582838894918	0.00011071276904647	0.00114272360520702
Gipr	30.721610910219	-1.01515087843773	0.262820900707534	-3.86251959301892	0.000112223561506698	0.00115760968821143
Rgs20	197.878561263945	-0.666536810963354	0.172617740844893	-3.86134592945621	0.000112764111855291	0.0011623629585894
Erlin1	929.292753213875	-0.368526133637589	0.0954429138846455	-3.86122047869367	0.000112822035362313	0.0011623629585894
Neurod6	2396.26964579033	0.530416057250874	0.137387429540473	3.86073208462365	0.000113047805578906	0.00116397880793012
Cyp4f41-ps	2.90894258657283	-2.51922454525816	0.652634570215684	-3.8600844335071	0.000113347852947337	0.00116635700479508
Dnm1l	8085.53680631361	0.365443739620604	0.0946932362352994	3.85923804222434	0.000113741106142714	0.0011695879917795
Pts	653.943394791982	0.43751496258496	0.113373935716151	3.85904361369571	0.000113831623770748	0.0011695879917795
Fos	9190.97128102345	-1.029480550458	0.26677654450444	-3.85896201021101	0.000113869635111068	0.0011695879917795
Wisp2	14.6942264286886	-1.18379210599567	0.306823964329763	-3.85821266791069	0.000114219242931641	0.00117246573625756
Esrra	431.037951036043	-0.657147571885561	0.170349199793218	-3.85764989024459	0.000114482473905251	0.0011744538604885
Uchl1os	5.31509070324826	1.55773974351584	0.404015438923644	3.85564410029944	0.000115425313793749	0.00118340731555631
Igsf3	2805.51250756571	0.542131829228692	0.140620866998201	3.85527298189413	0.000115600562280017	0.00118448488753663
Slc16a14	530.776955421406	0.498614503939981	0.129376544480769	3.85397914236377	0.000116213499986703	0.00119004315389659
2410018L13Rik	72.4084809404318	0.752210445122478	0.195204844417032	3.85344148281213	0.000116469108764214	0.0011919378003591
Adi1	245.13082934287	0.761451553848585	0.197625349281952	3.85300548039625	0.000116676777920952	0.0011933398376579
Tpd52l1	199.433270071978	-0.566347733538375	0.147038195386125	-3.85170487199694	0.000117298337726157	0.0011989707813825
Rtn1	31734.8998571812	0.511424542387779	0.132830178976062	3.85021345548247	0.000118014927544063	0.00120556567846887
Cycs	6077.539225507	-0.50587618461836	0.131414981622604	-3.84945596287591	0.000118380463405249	0.00120856862458346
Fcgr4	4.7818579154638	1.73615127197579	0.451116661573569	3.84856384137931	0.000118812334910038	0.00121224476573469
Tmeff1	7811.16785622387	0.330768575661173	0.0859688835530313	3.84753834167374	0.000119310609455025	0.00121659356959997
Kank4os	11.4897766300158	-1.57671036077051	0.409856830545354	-3.84697836723264	0.00011958352348184	0.00121864054165018
Rap2c	1245.71814719084	0.372325434219532	0.0969132592221088	3.84184204729122	0.000122114413459571	0.00124368153539102
Kctd12	2619.3697126246	-0.930286456003676	0.242367033411753	-3.83833742942765	0.000123870184062117	0.00126080284995353
Cog7	930.293207298651	0.376131263370313	0.0980357102458601	3.83667606861854	0.000124710794879051	0.00126859426646245
Gys1	280.345337881435	-0.67697725130493	0.176512368636861	-3.83529639612777	0.000125412961867532	0.00127496885857624
Itprip	591.333666464404	-0.802517563261093	0.209281690945235	-3.83462862726533	0.000125754151198953	0.00127766822932943
Dnah11	55.075133755508	1.07627285861133	0.280700072160718	3.83424503715518	0.000125950537896313	0.00127889403663088
Myl12b	6728.38416117367	0.475376577110289	0.123990166640268	3.83398611350767	0.000126083262464243	0.00127947233772308
2900011O08Rik	9431.09419726562	0.388926003451218	0.101466526745061	3.8330473696849	0.000126565569901793	0.00128359532334034
Zswim7	271.473157979346	0.640632236940265	0.167203329132505	3.83145622915545	0.000127387039389959	0.00129115098867878
Csf1r	41.0460198966508	1.28122814334105	0.334470716290416	3.83061380545069	0.00012782399551026	0.00129480263238527
Fam203a	255.244409343201	-0.460179691616992	0.120202948815287	-3.82835609402677	0.000129002022497534	0.00130595212943247
Isoc2b	40.4976920054917	-0.885720148988256	0.231381438115646	-3.82796544183275	0.000129206892207385	0.00130724240971474
Nudcd1	796.662238260556	-0.477012985776931	0.124686361051193	-3.82570300195929	0.000130399426352335	0.00131851779244642
Yipf1	933.112911387379	0.37528065978651	0.0981169139108343	3.82483146715717	0.000130861574473214	0.00132239889081669
Mrpl17	1001.53657399438	-0.458316012249071	0.119845620947391	-3.82421993082466	0.000131186774381713	0.00132489226806794
Gse1	390.742681256583	0.727824958479108	0.190329502484457	3.82402596012956	0.000131290082182395	0.00132514305303761
Gm20300	1782.95432850104	0.322845646396388	0.0844357564481406	3.82356551273009	0.000131535621172562	0.00132682825514927
D930028M14Rik	15.116770064466	1.04880134073424	0.274367009236551	3.82262190943661	0.00013204016136651	0.00133112248646859
Slc6a14	1.20270182850972	-5.78111287812236	1.51280467397838	-3.82145360704047	0.000132667373878774	NA
Ap4m1	417.842088614466	0.408104934896564	0.106799232093288	3.82123473078992	0.000132785191144541	0.00133783456901356
Mitf	78.6826910999528	-0.842018300900181	0.220369239946092	-3.82094298236071	0.000132942387522192	0.00133861965158005
Zhx1	3786.73214024616	0.557139316847706	0.145871033334178	3.81939651837078	0.000133778566875135	0.00134623651981736
Podxl2	7112.53082939298	0.395691409095475	0.103734770877087	3.8144530107877	0.000136484902440765	0.00137212130356289
Creb3l2	51.6786459031767	-0.730661068131737	0.191553261367298	-3.81440160776336	0.00013651331221045	0.00137212130356289
Mthfd2	794.178256625616	-0.737335453206584	0.193344717907818	-3.81357950289663	0.000136968436384521	0.00137587686900002
Atp9a	18774.1029099532	0.39088695885376	0.102589806051354	3.81019298016892	0.000138858358621301	0.00139403224951206
Mrap2	25.2438750716772	-0.964734072720978	0.253295891222006	-3.80872373439101	0.000139685919873753	0.00140150709624966
Tmem184a	4.52091210510041	-1.78258614534988	0.468049514789792	-3.80854180812571	0.000139788713527905	0.00140170559182435
Baiap3	50.4585901432677	0.867522893439056	0.227905045694401	3.80651025428512	0.000140941451487644	0.00141182523470382
Actl6b	2402.47416366193	0.271023831137826	0.071200856890721	3.80646867149076	0.00014096513950673	0.00141182523470382
Lrrc66	2.0228725646489	-3.04438419153059	0.799868847320309	-3.80610421537203	0.000141172915784436	0.00141306808294961
Ugt8a	58.0765820463744	-0.855789175096108	0.224857148364039	-3.80592381128397	0.000141275870771944	0.00141326087313687
Lurap1	199.826979344776	-0.696788760650087	0.183119117756803	-3.80511204502131	0.000141740014095091	0.0014170644630016
Isl2	3.8391049283278	-2.07801784769118	0.54620812241166	-3.80444332924994	0.000142123443938751	0.00141965981584874
Tnfrsf12a	337.383343372863	-0.749336684442329	0.19696755095387	-3.80436615479788	0.000142167757230855	0.00141965981584874
Irf4	5.32500047179193	-1.87161706954491	0.492143688703562	-3.80298907108867	0.000142960664744813	0.00142673391541425
Sertad4	346.877199360552	0.630511233063504	0.165840683626918	3.80190927385423	0.000143585309616017	0.0014321214047112
Pfas	608.552414426515	-0.349667424789167	0.0919930695620079	-3.80101921214264	0.00014410212719871	0.00143642769768443
Epha5	5720.23486954048	0.524550655991512	0.138010078703195	3.80081412111657	0.000144221462132201	0.00143676909118841
Slc17a8	71.3266509629237	0.877331038200724	0.230848230541733	3.80046680947862	0.000144423762283012	0.00143793611433428
Ormdl1	373.055850005751	-0.688115373586652	0.181159660580056	-3.79839182400416	0.0001456379665326	0.0014491707147139
Vmn2r29	137.412067264209	0.573110002220424	0.150926288714021	3.7972841385265	0.000146290071739193	0.00145480220929801
Ptger4	34.2832096708124	-1.04526846337126	0.275295613637367	-3.79689472549365	0.000146519975432207	0.00145623090355989
Lypd6b	303.80989499502	-0.456940444922911	0.120410101937887	-3.7948680182882	0.000147722016421293	0.00146731409958233
4932443I19Rik	8.41855586059827	1.33284174351615	0.351310375853786	3.79391511075346	0.000148290389842418	0.00147209378182191
Vps13c	2418.30512946069	0.512263664095671	0.135127115456057	3.7909760921542	0.000150056399619984	0.00148874992008405
Fra10ac1	167.946336073172	0.579046749766527	0.152750945982964	3.79078994267641	0.000150168918036965	0.00148899139751743
Zfp667	853.67107558842	0.498202029362449	0.131445128790275	3.79019012684255	0.000150532018458541	0.001491092678847
Dusp7	539.726608849651	-0.581009404835774	0.153294641268955	-3.79014817495412	0.000150557445068941	0.001491092678847
Arfgef1	5613.89141546867	-0.437523250372834	0.115483447967804	-3.78862302842578	0.000151484570968724	0.00149939534899055
Ttll3	85.9059908161895	-0.707791188236163	0.186914697623504	-3.78670696973141	0.00015265694784728	0.00151011436517233
Zscan25	229.749115241124	-0.540305082708874	0.142691503143896	-3.78652597249612	0.0001527681348565	0.00151032946439511
Creb3l1	29.9023800135091	-0.808974021908733	0.213653850305723	-3.78637698665927	0.000152859714387116	0.00151035057761313
Usp29	5200.48281473866	0.384010663894895	0.101439858595713	3.78559936114819	0.000153338549399303	0.00151419575740153
Net1	438.045617999919	-0.64319974471809	0.17005990009786	-3.78219524031218	0.000155451356987963	0.0015339195924926
Adam12	246.616013820409	-0.596226754075433	0.157644815393074	-3.78208920216496	0.000155517608808914	0.0015339195924926
Gas1	74.8717997070996	-0.696208947012159	0.184127998537151	-3.7811139671498	0.000156128175583231	0.00153864012672542
8430427H17Rik	1388.26118310475	0.632370703994135	0.167248094328008	3.78103383799355	0.000156178442331362	0.00153864012672542
Rrp15	289.187009464777	-0.540314168746376	0.142912443920684	-3.78073563031536	0.000156365648298559	0.00153958620243117
Ppfia1	779.377263408514	-0.348950971828854	0.0923071799779143	-3.7803231765107	0.000156624922694924	0.00154124035234643
Olfr212	2.67523183414655	-2.28547173907693	0.604877857655568	-3.77840205282953	0.000157837909009929	0.00155227194615123
Slc17a9	7.99880479030633	-1.35500486638937	0.35886147070704	-3.77584381995565	0.000159466891274417	0.00156737946802084
Tcp11l2	672.921538041907	0.660180626764005	0.174901613271997	3.77458283210532	0.00016027564760775	0.00157441220797235
Fam184b	597.629203410181	-0.61017963099319	0.161718448497825	-3.7730984724442	0.000161232613031761	0.00158289180445019
Mettl16	776.370751168638	0.384522969129717	0.10193189939104	3.77235165269093	0.00016171611766467	0.00158671607372784
Atp5g1	6479.98540003378	-0.420343327950661	0.111461874213965	-3.77118481915851	0.000162474278722376	0.00159322919309294
Fendrr	2.04977258605823	-2.9740069331004	0.789232457773538	-3.7682268434451	0.000164411264165088	0.00161128764172471
Pim3	735.058036249949	-0.515900078961383	0.136924452608105	-3.76777171012656	0.000164711222970263	0.00161329101570526
Mmp16	2743.72041355256	-0.441576929325854	0.117209616661106	-3.76741211092437	0.000164948583374562	0.0016140696591022
Dmgdh	3.82351406388869	1.76348230050435	0.468094769467444	3.76736168727261	0.000164981892195333	0.0016140696591022
Pcdhb19	595.741548680911	-0.712383273701101	0.189185357677659	-3.7655307072701	0.000166195695471849	0.001625003192668
Tmem132a	8047.42759686212	-0.653724789342209	0.173648154748252	-3.76465151783475	0.000166781513491454	0.00162978740556521
Rpgrip1	36.0864499977163	0.85679400089576	0.227602002378463	3.7644396443888	0.000166922978355863	0.00163022638086588
Kcnf1	1833.66066009355	-0.620871093811468	0.164946668036903	-3.76407175240764	0.000167168882766256	0.00163168425109306
Espnl	2.59867000583017	-2.11452981678823	0.562027756482493	-3.76232275434621	0.000168342607127245	0.00164219137143308
Duoxa1	4.86778873125595	-2.28824112793199	0.608454376120113	-3.76074397315252	0.000169408754774075	0.00165163754798789
Vgll3	54.3073935073973	-1.00918802698417	0.268447392926623	-3.75935119347583	0.000170354565878099	0.00165990028818095
Neat1	69.8170423581274	-0.731856610920299	0.194727146776861	-3.75836971389992	0.000171024051509086	0.00166546259157003
Cacna2d3	1781.30083709057	-0.622113216320127	0.165659976697158	-3.75536221073728	0.000173090968580774	0.0016831028320104
Egr1	2171.31790821373	-0.698510724818014	0.186005321287032	-3.75532656799702	0.00017311560445475	0.0016831028320104
Pbx1	4182.66591952157	0.728432454496904	0.193974545494033	3.755299194756	0.000173134526779703	0.0016831028320104
Mest	2931.76318882094	-0.59087216861435	0.157384866374417	-3.75431375472068	0.000173817029766113	0.00168876545720977
Tti1	746.717038269498	0.304366048111138	0.0811118321595899	3.75242476969684	0.000175132395989004	0.00170056678474429
Wrn	482.628203525927	0.387583145921598	0.103461444030255	3.74616021991979	0.000179561932236157	0.00174257631479295
Mxd4	622.162674866555	0.553812234777539	0.14798658660348	3.74231372915872	0.000182333679586455	0.00176845865220958
Jazf1	3315.55662362319	0.312315510564517	0.0834639442471331	3.74192129765356	0.000182618712391922	0.00177020641644661
Cdk15	41.0222839210472	-0.931347253810452	0.249043122535116	-3.73970276444445	0.00018423798254695	0.00178487812581055
Kcnj14	7.47108164537897	-1.35902896455119	0.363492847229622	-3.73880524722589	0.000184896892186244	0.0017876924041533
Clmp	934.814728407444	0.565068304423574	0.151137174235098	3.73877775129365	0.000184917113174035	0.0017876924041533
Hint3	469.227142639377	0.354165077608561	0.0947287016932817	3.73873040881842	0.000184951934526702	0.0017876924041533
Tpcn1	274.073585638279	0.851248705191855	0.227683897190511	3.7387303875934	0.000184951950139513	0.0017876924041533
Brk1	3782.36729503607	0.260251501234655	0.0696775647486656	3.73508319605328	0.000187653139977991	0.00181276368516497
Mettl4	516.5494064014	-0.313461714795116	0.0839822896844518	-3.73247402485561	0.000189608254681031	0.00182982233563769
Cdkn1b	2961.81022097258	0.465505626868851	0.124721183399884	3.73237018908277	0.000189686456044541	0.00182982233563769
Cdc42ep3	783.87484618631	-0.614226950715204	0.164575983212943	-3.73217852765589	0.000189830880766537	0.00182982233563769
E130006D01Rik	152.938918277826	0.580753939803345	0.155614046824158	3.73201488975857	0.000189954270395364	0.00182982233563769
Arrdc1	244.330531971398	0.472858366908785	0.126703532151362	3.73200619493307	0.000189960828755944	0.00182982233563769
Proser2	20.7268473390221	1.03961504051884	0.278604694531075	3.7315058250136	0.000190338608094987	0.00183241604121548
Ankrd34b	298.717061485226	-0.44576118010136	0.119494616434824	-3.73038713710163	0.000191185773151978	0.00183952305723322
1700026L06Rik	8.05381833194136	1.29997312404444	0.348647850567727	3.72861361952355	0.000192536096375954	0.00185146043474052
Chrdl1	78.3261102770697	-0.869422875381831	0.233265020292235	-3.7271892472031	0.000193627071284463	0.00186089170501391
Cenpj	84.2548616037872	0.730194335226283	0.195946267388088	3.7265029079634	0.000194154833250598	0.00186490245407827
Cldn15	7.98993087457306	-1.30359130249815	0.349975832802932	-3.72480377304277	0.000195467208050401	0.00187644074766291
Siglece	4.91662710052768	2.34292409810851	0.629317120825586	3.72296259004504	0.000196898705505119	0.00188897246520304
Guca1b	4.79927547661577	-1.87869476340416	0.504640557009765	-3.72283744797746	0.000196996358594253	0.00188897246520304
Slc9a7	1773.92743577013	0.359861431340164	0.0967053968720753	3.72121353078359	0.000198267696377006	0.0019000841776516
Dgkz	2530.69479143348	-0.498960635146583	0.134092045392299	-3.72103083137278	0.000198411210154277	0.00190038099527233
Ptchd1	2575.44688260736	-0.564383022013473	0.151689847660421	-3.72063806983921	0.000198720062138712	0.00190198969804716
9930014A18Rik	60.4190393354814	-0.910034408160103	0.244597999935404	-3.72053086452233	0.000198804442559116	0.00190198969804716
Cntnap3	664.592447475767	-0.728627554770661	0.195908238754915	-3.71922875424443	0.000199832013979815	0.00191073804533588
Pcdh7	8712.68729052716	0.587961231680875	0.158126503907244	3.71829653570138	0.000200570744988852	0.00191671624215153
Homer1	8281.70451338406	-0.574891558451353	0.154732351242201	-3.71539341214741	0.000202887777765275	0.00193776188650703
Dgkh	970.783379933968	-0.441406678135417	0.118831968865125	-3.71454485144831	0.000203569763065951	0.00194306440950222
Msrb1	243.356878065132	-0.601403928933967	0.161910741077503	-3.71441650462268	0.00020367310226335	0.00194306440950222
Runx2	26.3870009372829	-0.841707091306103	0.226706237587201	-3.71276547246454	0.000205006842237722	0.00195468409826436
Mavs	116.360471121344	0.57613727761428	0.155188060183754	3.71251033702007	0.000205213676625516	0.00195555199971697
Nol9	633.865259953945	-0.474072217624665	0.127722540927869	-3.71173493872468	0.000205843483884259	0.00196044730336695
Lyve1	6.11614857579543	-1.42500278465621	0.384103910342715	-3.70994084227041	0.000207307682746786	0.00197327932968559
Bnip3	4442.18109776446	0.361855904779966	0.0975649280559868	3.70887276801268	0.000208183999535603	0.00198050423445532
Dpysl2	38835.1131839697	0.503235549383448	0.135701948372158	3.70838853399027	0.000208582441441406	0.00198317742465066
Tmsb10	17486.428250312	0.383105826299893	0.103370306682265	3.7061496535699	0.000210433986485887	0.00199965576578542
Pnrc1	2000.31632151024	0.539084391128247	0.145477197739062	3.70562809503098	0.00021086752447052	0.00200264849168121
Spice1	322.495336731607	0.418518400066009	0.112951558643132	3.70529105656975	0.000211148128830265	0.00200418623014495
Tmem132b	3044.64510860544	-0.421031711353909	0.113649958190566	-3.70463586663121	0.000211694616750864	0.00200824454969387
Osbpl9	2154.93105366746	0.42441856812981	0.11457302222109	3.70434994121754	0.000211933520588391	0.00200938204865557
A630095E13Rik	3.20370925346738	-2.60218049824824	0.702620773478401	-3.70353481774509	0.000212615984265241	0.00201472138625301
Cpq	32.6839306984118	-1.07884181005818	0.291312986595068	-3.70337698524162	0.000212748368094225	0.002014845173101
Chrna7	568.962443109139	-0.608315554439078	0.164291000894694	-3.70267118178306	0.000213341316458681	0.00201932817809489
Serpinb6a	846.241547443354	0.365934859996207	0.0988660189513235	3.70132087726092	0.000214480039766264	0.00202896916050035
Cd48	17.7450999706534	2.10416424002295	0.56862671955423	3.70043152680636	0.000215233151335626	0.00203495352377009
A630001G21Rik	7.30275740291575	1.51249029277453	0.408788695476203	3.69993179731307	0.000215657416577831	0.00203782380320831
Ipo11	4492.21763437043	-0.333425778552593	0.0901429071972426	-3.69885761309007	0.000216572047604077	0.00204532192161211
Lhcgr	8.87290822337587	1.32229944107149	0.357516175357576	3.69857235060475	0.000216815550167143	0.00204647701516063
Stk40	900.295085128949	-0.496867565825975	0.134353427866169	-3.69821279380316	0.000217122837224782	0.00204823253037858
Tpx2	189.734643185614	0.570599633807175	0.154324075343897	3.69741164841354	0.000217808989167962	0.00205355811897834
Arhgdig	3633.3497330356	0.358543760850379	0.0970007543092819	3.69629868760794	0.000218765578949407	0.00206142609717616
Fank1	193.215663630268	0.580047257752234	0.156942539309139	3.69592119705467	0.000219090926888844	0.00206334043025378
Nsg1	19991.426139524	0.461536716133261	0.124885701960898	3.69567299447753	0.000219305092827394	0.00206420613014681
Fdft1	9620.45964752117	0.711558090628418	0.192587984996278	3.69471694011529	0.000220131879129917	0.00207073892593478
Htatip2	57.7750265454777	0.81088384100523	0.219486890964378	3.69445226292277	0.000220361286014708	0.00207073892593478
Il1rapl2	28.99044425224	-1.17525477759581	0.318113973334018	-3.69444562676221	0.000220367040738173	0.00207073892593478
Kctd12b	58.6126631213853	-0.874474398758398	0.236925728532108	-3.6909220631135	0.000223442598747952	0.00209847148078861
Myrip	288.555588149456	-0.557861293950462	0.151174469847272	-3.69018191043802	0.000224093744635023	0.0021024888769237
Irak3	7.67672954153162	1.48041040076193	0.401178617671367	3.69015280364377	0.000224119387567373	0.0021024888769237
Nr1i2	0.96703247080287	-5.61257283978781	1.52151572270904	-3.68880370805152	0.000225310960729306	NA
1110012L19Rik	879.190877454359	0.346010427046603	0.0938589519492443	3.68649361473494	0.000227365143978516	0.00213175337102788
Endod1	1816.88431384019	0.372932747916669	0.101183295813732	3.68571457291922	0.000228061838663052	0.00213709889437531
Sorcs3	924.961145248847	-0.678844797100085	0.184190746617733	-3.68555320810415	0.000228206396991956	0.0021372674540245
Rangrf	134.325771763794	-0.690360469213066	0.187344587811177	-3.68497685083316	0.000228723427903172	0.00214092228579433
Slc31a2	201.360683140963	0.483819295340825	0.131312803018145	3.68447922990396	0.000229170711255319	0.00214385251156857
Btbd17	73.7057885210865	0.768845519842145	0.208678954663292	3.68434622975132	0.000229290396535167	0.00214385251156857
Lynx1	971.142447683644	-0.962725392657766	0.26142006280228	-3.68267600557461	0.000230798414473871	0.00215542192101542
Mid1	295.248609806644	-1.48764493555372	0.403966735486277	-3.68259266140556	0.000230873907838167	0.00215542192101542
Gca	181.877250392742	-0.593547251311344	0.161181767431653	-3.68247141577617	0.000230983773823649	0.00215542192101542
Gm11201	9.10634933809146	1.23920012902323	0.336531288289765	3.6822731559992	0.000231163531427241	0.00215542192101542
2410004N09Rik	153.35221282412	-0.597375936672603	0.162230327067675	-3.68227043284827	0.000231166001359643	0.00215542192101542
Kcng2	28.8173596581713	-0.964551849817532	0.262008513565911	-3.68137598542151	0.000231978617950672	0.00216180515602376
Ror1	11.3413079896731	-1.13980879648439	0.309834404863449	-3.67876768555359	0.000234363624194182	0.00218282634205348
Clvs1	2088.96994076325	-0.319386498028486	0.0868445100395194	-3.677682076658	0.000235363060780246	0.00219092648530057
Zfp963	211.964216599397	0.494625349265486	0.134556575002924	3.67596566169092	0.000236951395902562	0.00220449656816014
Sh3glb1	5298.81768275217	0.38299411533231	0.104193688075782	3.67578998694961	0.000237114527835392	0.00220479951378217
Lin7a	4016.24101870105	-0.416098651053432	0.113241606580714	-3.67443260138538	0.000238378556337449	0.00221533313280912
Vezf1	1013.03036179178	0.374334882289546	0.101889936091582	3.67391419259584	0.00023886297672099	0.00221861398509937
Sema4a	421.610163291951	0.807075904501265	0.219741289367361	3.67284594909246	0.00023986409700996	0.00222668781864222
Ston2	252.440905374301	0.722108457850468	0.196695358727144	3.67120232283761	0.000241412137042857	0.00223938314483255
Trib3	70.4029045080859	-0.941571602884995	0.256481264209462	-3.67111260850631	0.000241496903158834	0.00223938314483255
Txndc15	2015.81542415316	0.381564580980162	0.103961660834738	3.6702432215537	0.000242319786508203	0.00224578041436746
Tada1	1246.67848675617	0.254069024836763	0.0692509734137133	3.66881521388769	0.000243677121045918	0.0022571211552284
Sgce	632.840041404541	0.345320202583796	0.094142781020966	3.66804760640003	0.00024440968324114	0.00226266552149665
Ahcyl1	1801.24902341174	-0.398594423090605	0.108734845545734	-3.66574690100566	0.000246617744132992	0.00228145428556616
Med12l	1009.34962349953	0.461239272214108	0.125827356159685	3.66565178107025	0.000246709435357326	0.00228145428556616
Nupr1	42.4215291088366	-1.12412083925354	0.306729745356968	-3.66485760272548	0.000247476235599094	0.00228729267341341
Tcf12	2132.86658445241	-0.439047980147049	0.119848490086454	-3.66335846058919	0.000248929793522856	0.00229946854126201
Sil1	462.510059898818	0.428970316807807	0.117107791352886	3.66303823043824	0.000249241322662202	0.0023010874655407
Fgf21	1.54468977750586	-3.08764613043836	0.843060910424033	-3.66242354764779	0.000249840328704805	0.00230440499872666
Atad3a	883.524718069114	-0.384000909321865	0.104849829491749	-3.66238944958976	0.00024987359662848	0.00230440499872666
Elovl6	5072.44905816925	0.475455578786519	0.129851898600437	3.66152196395315	0.000250721361625083	0.00231096119672552
Adcy10	6.03778139600497	-1.48504743465565	0.405634269333895	-3.66105022905066	0.000251183504123509	0.0023139578017619
Inpp5f	16393.5582134393	0.464555842233857	0.126941269181139	3.6596123957998	0.000252597033427505	0.00232571074506917
Arhgap22	22.8956318014484	0.901919161172878	0.246489535531317	3.65905659738764	0.00025314543360278	0.00232948980480465
Mrm1	381.55918891959	-0.484315466447173	0.132366553375749	-3.65889610400556	0.000253303998297832	0.00232967936560849
Rtn3	23717.0731098953	0.451072038668002	0.123297462248083	3.6584048888242	0.00025378988943754	0.00233287755745362
Mettl13	225.292499279507	-0.494443538605086	0.135216404546459	-3.65668307971612	0.000255499946948254	0.00234731888148434
Henmt1	15.1650433977971	1.07313347122566	0.293523887579959	3.65603453972149	0.000256146857442178	0.00235198250939022
Arid3c	2.3168400476752	-2.37029084394239	0.648445230221231	-3.65534471297401	0.000256836636489365	0.00235703448030403
Mir9-2	107.265089672292	-0.744329543542861	0.203658576791171	-3.65479104916895	0.000257391521624743	0.00236084369047008
Cav1	173.121274064702	-0.687813213368217	0.188211618820353	-3.6544673367096	0.000257716468712438	0.00236254087441815
Sgk3	314.049430360105	-0.553131302431218	0.151409943656206	-3.65320327763392	0.000258989036264772	0.00237291853845195
Zbtb16	246.295599806055	-0.759287771179196	0.207919412196276	-3.65183684947334	0.000260371287682983	0.00238428935130957
Prepl	3892.92001194305	0.553815459343594	0.151663704526045	3.65160181913193	0.000260609735746757	0.00238517940261233
Sv2b	7273.59724336401	0.399824399803747	0.109555198004004	3.6495246879033	0.000262725990357161	0.00240324543508723
Asic3	5.25102280607406	-1.61046487185766	0.441400084825275	-3.64853774891129	0.000263737155180446	0.00241118873978182
Gyk	1047.17861140046	-0.427048431581601	0.117078328466667	-3.6475446581319	0.000264758304647262	0.00241877898230115
Ksr1	364.840561259591	-0.540842621078854	0.14827957560287	-3.6474519088682	0.000264853863453442	0.00241877898230115
Hspa5	20303.5223103752	-0.483538608488556	0.132574684803484	-3.64729215992713	0.000265018527287345	0.00241897451447249
Pcdhga10	192.412450727589	-0.513304066232595	0.140751038009853	-3.64689364633078	0.000265429720127611	0.00242141882986215
Ramp1	86.9015487876452	-0.984345945073512	0.270004581507104	-3.64566386088384	0.000266702406661759	0.00243171535577239
Cdh4	576.768693340689	0.628792284285502	0.172504156764331	3.64508482624297	0.000267303619703339	0.00243532756279593
Wwc2	592.408131434029	0.591002587538552	0.162140423213395	3.64500459432455	0.000267387024838544	0.00243532756279593
Ppfibp2	40.3167310016722	0.856464898772741	0.235069210972108	3.64345843179933	0.000268999111753496	0.00244868948844719
Fcgr1	1.49091614459786	4.12776112046204	1.13346374696181	3.64172310894485	0.000270819273165108	0.00246393008979849
Slc9a6	4143.19761773557	0.504340087454466	0.138494933670124	3.64157788367721	0.000270972120693071	0.00246399312332967
Vbp1	3613.57718076988	0.374794387550576	0.10297748799421	3.63957593888531	0.000273087395958514	0.00248108379148335
Hrc	6.02781987394494	-1.62744970511896	0.447160390881796	-3.63952116132121	0.000273145491434772	0.00248108379148335
Sesn3	977.333869559014	0.744342186868185	0.204566339471158	3.6386347274554	0.000274087229059512	0.00248829943542953
Tusc1	126.380484756944	0.588434536451657	0.161746805862218	3.63799787770096	0.000274765688797503	0.00249311844225397
Mia	49.3414066026009	0.776872591389694	0.213596146938632	3.6371095758244	0.000275714659007578	0.00249941506628436
Rbm4b	694.567238684324	0.339558855164598	0.0933605177985006	3.63707124994171	0.000275755671472685	0.00249941506628436
Kcnn2	332.696861241529	-0.556129854633044	0.152919589093175	-3.63674698533351	0.000276102895397888	0.00250121968438237
Dsc2	42.4827878002579	0.734700823179679	0.202196071264556	3.63360582915772	0.000279487733689078	0.00253052540003955
Pdlim1	71.1573049953853	-0.788371778822713	0.217060594683873	-3.63203546903987	0.000281194460196747	0.00254338768870794
Mrgpre	237.923911777405	0.478437198090719	0.131727519835548	3.63202160556892	0.000281209570935552	0.00254338768870794
Prcp	366.702359737276	0.497211077045046	0.136905275847849	3.63178901591511	0.000281463199694578	0.00254431883835259
Odc1	5600.59795085028	0.536231711564387	0.147741270026883	3.6295322997211	0.000283935202934645	0.00256529151244217
Rgsl1	25.1279617926194	0.969211718051824	0.267124730447521	3.62831144996601	0.00028528098436313	0.00257607203313145
Nhp2	775.950567204208	-0.363968399248274	0.100365926032948	-3.62641399959574	0.000287384471809825	0.002593679417948
Atpaf1	584.562984342375	-0.435042074294939	0.119979403359062	-3.62597297631986	0.000287875460980837	0.00259672277463804
Ndst4	54.7287387498616	-0.838046495418384	0.231172757863561	-3.62519573311057	0.000288742675685921	0.00260315473658968
Mvp	42.7636210507298	-0.826666012383252	0.228051026412624	-3.6249168678922	0.000289054417694946	0.00260457465165254
Trpm6	8.98700401491109	-1.20204771058659	0.331722073579666	-3.62365909996613	0.000290464392300254	0.00261588358847045
Bin2	5.16670728116512	2.00755859418973	0.554035642680371	3.62351884885484	0.000290622014318379	0.00261590796043718
Cdc34	687.602813448881	-0.520059685535164	0.143537312188338	-3.62316722813357	0.000291017537618992	0.00261807253075882
Sqle	10620.5390682525	0.61661805451871	0.170215362584786	3.62257580723107	0.000291683939582394	0.00262216964214084
Vwa8	746.187371344754	0.344709325956899	0.0951581815942899	3.62248752741597	0.000291783534145603	0.00262216964214084
Phf20	3551.11829560583	0.340614102865934	0.0940319716451928	3.62232224749216	0.000291970083511436	0.00262245044158198
Mllt11	18009.239984888	0.321566281116931	0.0887934856717888	3.62150757664307	0.000292891225886555	0.0026293254866137
Hyou1	5466.96197772985	-0.486070497244452	0.134261300320205	-3.62033211420717	0.000294225111227822	0.00263989650807279
Akap6	14276.0059391167	0.472139081880774	0.130446915711083	3.61939628320901	0.000295291134954459	0.00264721710211057
Csf3r	5.92587376315323	1.66853063857235	0.461004026179668	3.61934070814833	0.000295354555275158	0.00264721710211057
Nptx2	946.206196006071	-0.730983930561086	0.202006059413964	-3.61862378129511	0.000296173831877941	0.00265315189659995
Fbln1	144.705841121332	0.678793558959708	0.187630508332982	3.61771422457095	0.000297216301945163	0.00266107872462673
Rrad	24.9536249651824	-1.04006214034786	0.287515770185933	-3.61740901960008	0.000297566875841337	0.00266280565207038
Poglut1	1593.99608972138	0.36783615913355	0.101693427382847	3.61710848577018	0.000297912462646334	0.00266448614631674
Prdx4	363.089314431076	-0.525676519937246	0.145350177582099	-3.61662110553891	0.00029847370518885	0.00266809263410213
Sec14l1	2102.68679434618	-0.529877791452851	0.14651965418256	-3.6164280786019	0.000298696258935797	0.0026686693271904
P2ry6	5.83191459248403	2.03494227303842	0.562986014893329	3.61455208336568	0.000300867330263108	0.00268664502317443
Fam179b	3373.39749858991	-0.300219706078143	0.0830835356352224	-3.61346810511598	0.00030212853559228	0.00269648121142243
H2-M3	21.6327531107677	-0.944649511448866	0.261511106342892	-3.61227301073113	0.000303524761721433	0.00270751142442056
Cbr4	386.788918914177	0.437207030793337	0.121049956368566	3.6117900733657	0.000304090688713195	0.00271112743907656
Mpp1	715.001663153375	-0.424099518394324	0.117443842406144	-3.61108347364609	0.000304920493710728	0.00271709100622657
Iars	2509.84297870458	-0.415900203954356	0.115218057472239	-3.60967901281069	0.000306576140988594	0.00273040333161045
Syt16	3842.16672981994	0.427106137625332	0.118387358466052	3.60770054471489	0.000308922741720227	0.00274985209103202
Mt2	501.430631012084	-0.60891100876125	0.168834438392162	-3.60655690012067	0.000310286843187533	0.00275965419813622
3110002H16Rik	1078.34818921896	0.316335506829538	0.0877125212212921	3.60650340937581	0.000310350783030953	0.00275965419813622
Sema3f	121.830726027794	0.820785523726913	0.227684406774699	3.60492637749719	0.000312241431255282	0.00277500463588247
Eml1	1544.59366534137	0.388093170241488	0.107758223777784	3.60151788546368	0.000316364653010871	0.00281017018976411
Znrf2	3369.82311464489	0.612168614103753	0.170065085811824	3.59961370778429	0.000318690255073	0.00282786435219542
Lyrm9	1614.01407061232	0.434008099995939	0.120570779161876	3.5996126342789	0.000318691570663738	0.00282786435219542
Cmc1	275.768472565396	0.416149577910736	0.115633715914192	3.59886019938636	0.00031961493813984	0.00283456819612885
Gem	143.220742693716	-0.713218254698256	0.198256570183062	-3.59745078833805	0.000321351271033779	0.00284847116150992
Gm6682	73.1483114459297	0.80156777715957	0.222993010011024	3.59458701023831	0.000324906550983877	0.00287740093742323
Prrt4	115.983813853203	0.816599375088711	0.227177235514473	3.59454754891886	0.000324955796971816	0.00287740093742323
2610035D17Rik	226.356610221446	0.700171274402736	0.19495581318191	3.59143573600146	0.000328861273273589	0.00291045674030284
Mthfr	727.194639937782	-0.480791834299248	0.133954669896968	-3.58921293799651	0.000331677840130494	0.00293323819665802
2610507I01Rik	40.4440492462638	-1.92339411048285	0.535894182113198	-3.58913041917773	0.000331782835225443	0.00293323819665802
Kbtbd7	1495.91144234691	0.540353951050353	0.150608918623095	3.58779517169637	0.000333486103373369	0.00294675371091717
Alpk3	14.450730223422	-1.14049185926086	0.317914577347479	-3.58741605615117	0.000333971199952873	0.00294949669581811
Cxx1c	947.118052198573	-0.346310649275645	0.0965494737525299	-3.58687246875409	0.000334667898342397	0.00295391343756036
Vim	2923.71509778255	-0.52834387086361	0.147304224110206	-3.58675302120548	0.000334821172538821	0.00295391343756036
2610318N02Rik	15.8886430590798	-1.02700489461603	0.286392880488179	-3.58600008794009	0.000335788843786884	0.00296090361158503
Pknox2	1033.58363709737	-0.715551198417952	0.199570785816035	-3.58545062340713	0.000336496667549544	0.00296559641348727
Dnaja4	425.100234070576	-0.452637672889736	0.12625127758199	-3.58521261375581	0.00033680370624127	0.00296618279016877
Mcu	519.323005146038	-0.590446911022497	0.164693454393838	-3.58512676290423	0.000336914520404103	0.00296618279016877
Trp63	10.2935133454386	1.21582978018563	0.339424196810616	3.58203625908263	0.000340926458911425	0.00299993964834722
4931440P22Rik	37.0831778977995	1.01964201218409	0.284766577662245	3.58062389397911	0.000342774762110024	0.00301463262134889
Slc12a8	26.6488218988956	-0.871132184452871	0.243308785157351	-3.5803564753714	0.000343125775450601	0.0030161487997183
Gm8773	82.5865736367626	0.69668608520626	0.194656645121937	3.5790511275371	0.000344844005391828	0.00302967527317711
4833403I15Rik	7.3361395059348	-1.3961548026631	0.390272937232839	-3.57738051877819	0.000347054771579544	0.00304751267441091
Fam163a	82.613061154024	-0.78531433159898	0.219671976149462	-3.57494089762575	0.000350307021064972	0.00307447211938832
Ddx41	870.203868177183	-0.380077851072367	0.106335675768646	-3.57432111400975	0.000351137781203852	0.00308016237579649
Prkab1	307.737250538086	-0.432452017124699	0.120998063027954	-3.57404082596586	0.000351514085067234	0.00308186232629559
Pgr	428.504253738604	0.420566315812176	0.117678789518733	3.57384977813039	0.000351770794613967	0.00308251252612945
Gpd2	3151.97260320317	0.470534471435108	0.13167936345736	3.57333494847485	0.000352463440545149	0.00308668821589009
2310036O22Rik	1381.92744291004	0.367315153198983	0.102796622538642	3.57322200017715	0.000352615570417076	0.00308668821589009
Slc11a1	17.0625296902143	1.33932388161576	0.374836489284217	3.57308831958519	0.000352795703936271	0.00308668821589009
Rpgrip1l	1055.74347611595	0.383845140005634	0.107434658811941	3.57282411700617	0.000353151967942056	0.00308820514276
Ephb6	980.965901760744	-0.749245563935155	0.209720483239559	-3.5725912527071	0.000353466252788411	0.00308903444597173
Gabrb3	16222.9036888686	-0.381604578073572	0.106817750022973	-3.57248283165955	0.00035361267227664	0.00308903444597173
Runx1t1	1482.45473805141	0.719399097762293	0.201453527473047	3.57104244728871	0.000355563260087303	0.00310446805058645
Prkcq	171.269387715242	-0.753393755870378	0.21099827008159	-3.57061579499705	0.000356142967250807	0.00310792255555407
Phlda1	54.961917427217	-0.702336273928942	0.196711332435942	-3.57039050690002	0.000356449430422366	0.00310899022836367
Mkrn3	1027.76172719054	0.497149060074551	0.139261796707061	3.5698883098594	0.000357133465299311	0.00311334831958914
Itga10	43.1414117984191	-0.790725472331717	0.221548525936532	-3.56908478171613	0.000358230492606239	0.00312130036024198
Cyp26b1	20.5266516524437	-1.10546799235885	0.309768714363962	-3.56868831840771	0.000358772929578087	0.00312441448625868
Gmfb	15074.0615428883	0.333166062101636	0.0933666386211666	3.56836303653868	0.000359218550356823	0.00312668270171408
Wdr37	4581.19282264425	0.263222390960688	0.0737735258839096	3.56797899797952	0.000359745331279838	0.00312965464399348
Sltm	1347.56215859243	-0.435801458220658	0.122227870151021	-3.56548353237438	0.000363185967272376	0.00315795996053622
Glce	2326.33558209758	-0.399141126868951	0.112022591461789	-3.56304136210864	0.000366582892017526	0.00318585626073492
4932412D23Rik	1.6294484392632	3.24175427006282	0.910005397414364	3.56234620066402	0.00036755524100906	0.00319266347720112
Dixdc1	2004.65702690714	0.338084692680848	0.0949144620269351	3.56199345664421	0.0003680495593282	0.00319531355209048
Gm11837	129.97920976195	0.634948851392193	0.178320480318899	3.56071748044131	0.000369842845644047	0.00320923242114356
Zcchc9	454.036588846399	-0.493956761139499	0.138737826457099	-3.56036110521194	0.000370345161014829	0.0032119406209021
Syne4	17.431613187004	-1.02270835045061	0.287537330165828	-3.55678460901337	0.000375421718434628	0.00325319897150531
Krt12	30.3393423822373	-0.859254802708703	0.241585041001941	-3.55673844351067	0.000375487669990752	0.00325319897150531
Pcdh19	2537.4881754305	-0.867724894274699	0.244073043521505	-3.55518529107146	0.000377712809007737	0.00327059651177726
Ostf1	236.504210201753	-0.456673709162223	0.12845713911383	-3.55506678969044	0.00037788308625355	0.00327059651177726
Ccl9	11.6857950968699	1.42908660323783	0.40201410802657	3.5548170442401	0.000378242185980404	0.0032720274346645
Rian	43291.9369833452	0.414925078274378	0.116742257028106	3.55419784435455	0.000379133886792495	0.0032780618598966
Urb1	366.826311642252	-0.527286575898809	0.148388783038258	-3.55341263067614	0.000380267487456965	0.00328505805792559
Lrrc73	751.84533115535	-0.554432734906943	0.156030208045202	-3.55336791415624	0.000380332139242244	0.00328505805792559
Aamdc	590.857342946458	0.414561145590882	0.116725018667287	3.55160487720757	0.000382889366314612	0.003305454928215
Eid1	14808.1779612484	0.330860053694863	0.0931679206561776	3.55122290338381	0.000383445520611928	0.00330753744497475
Dcp2	2020.61759502229	-0.394463828481086	0.111079956315998	-3.55117018014415	0.000383522344975752	0.00330753744497475
C2cd4b	13.2062091965138	-1.22587890221775	0.345217498702483	-3.55103349866468	0.000383721574002261	0.00330756635967442
Ralgps1	2401.62584570041	0.468317710997092	0.131908148509557	3.55033192633403	0.000384745719931796	0.00331470215651444
Aldh1a7	26.5901101100679	-1.10507284881039	0.311341873115739	-3.54938716643356	0.000386128904503028	0.00332492232607757
Lgi3	124.058074099936	-0.696300251405666	0.196214981620698	-3.54865997312927	0.000387196722262438	0.00333241786550638
Cryba4	3.95971542931605	1.88067743121432	0.530371918783376	3.54595966454714	0.00039118607910809	0.00336404726380685
Ntsr2	33.0224364648731	1.12694486204403	0.317816044084612	3.54590299331776	0.000391270213556595	0.00336404726380685
Trappc6b	665.647583035605	0.516329222398101	0.145697055545855	3.54385488755192	0.000394322216097706	0.00338814993664056
Rgag1	147.017154236315	0.771530891490887	0.217715774301461	3.54375283080124	0.00039447487714292	0.00338814993664056
Tnfaip2	11.5031354554598	1.39855683121685	0.39469359719681	3.54339883177651	0.000395004832784954	0.00339097692242335
4632428N05Rik	26.7176448523075	1.12945775487797	0.318786563752372	3.54299046228096	0.000395617010267219	0.00339344831726368
Adamtsl3	25.9036512969174	-0.906148056556297	0.25576170765785	-3.5429387176618	0.000395694642703552	0.00339344831726368
Rapgef2	5733.17509121932	0.396738347861067	0.111991544926145	3.54257411238237	0.000396242063520385	0.00339641801248996
Egflam	16.8239154938127	1.18569475757915	0.334738240862955	3.5421550717433	0.000396872087867667	0.00340009237733811
Mslnl	4.21252125313409	-1.82465241785785	0.515435980215389	-3.54001755386841	0.000400100418818078	0.00342601200413898
Rrp9	517.094646060541	-0.514255145693034	0.145282680390976	-3.53968652222758	0.00040060257024216	0.0034285732392849
Camkmt	119.859871499048	0.57319551402675	0.161940763399782	3.53953817428726	0.00040082779450097	0.00342876298781327
G6pc2	2.62480496029628	-2.15821507387969	0.610033043660683	-3.53786585219824	0.000403374937740218	0.00344880465756016
Slc26a1	50.6522940863287	0.668391991405504	0.189117768814703	3.53426330901985	0.000408913493770912	0.00349438929950183
Amacr	151.946167435808	-0.659761507562737	0.186766825989825	-3.53254119978824	0.000411586087504822	0.00351544900030674
Rgs17	3737.43070436674	0.51290951490501	0.145329314736998	3.52929149795566	0.000416673895503344	0.00355710586424139
Ssr3	6559.28157920258	-0.394519149424222	0.111790411292293	-3.5290965017804	0.00041698104627639	0.00355780404848556
Tjp2	177.185112154504	-0.57246414849905	0.162218382081576	-3.52897212481856	0.000417177070709547	0.00355780404848556
Pold3	863.720037732906	0.25147438100956	0.0712906475468785	3.52745261353108	0.000419578856472289	0.00357513693154985
Dirc2	3561.54667045008	0.294193175762477	0.0834018348570231	3.52741850664096	0.000419632914741905	0.00357513693154985
Podxl	485.901524400183	0.681515754328592	0.193225507251883	3.5270485973686	0.000420219626403374	0.00357833011167291
Rgcc	55.9988846390127	-0.74766828429676	0.212072015044051	-3.52553958683072	0.000422621007820882	0.0035969648881368
Zfp389	9.28886518631295	-1.1829099982234	0.335543287560305	-3.52535735947574	0.000422911863031216	0.00359762706254162
Ppan	432.672292540254	-0.506270758942499	0.1436165888154	-3.52515515873478	0.000423234816763969	0.00359856148835669
Josd1	2810.79214567879	-0.274977544936479	0.0780142288596392	-3.52471015808167	0.000423946380253758	0.00360279747205081
Pole	108.136971253178	0.563855244360447	0.159992210606109	3.52426685164457	0.000424656345252961	0.00360701561667077
Lrch2	1277.65599910033	0.447752728269304	0.127061060705261	3.5239177587848	0.000425216206319303	0.00360862747183518
Plcl2	3287.78512385765	-0.26732778794296	0.0758634249977835	-3.52380330773058	0.000425399908279207	0.00360862747183518
Gbp8	3.36902204077945	1.98879040564414	0.564396172718997	3.52374892278782	0.000425487225892682	0.00360862747183518
Amhr2	6.5113311136774	-1.58213489547343	0.44907823748002	-3.52307184679333	0.000426575705660181	0.00361436979638331
Kcnk13	56.2051539514598	-0.804754887502591	0.228424877353285	-3.52306148448948	0.000426592384471867	0.00361436979638331
[truncated: 22,019 more rows]
