# Supplementary material for: Cohesin-dependence of neuronal gene expression relates to chromatin loop length
Source: eLife. 2022 Apr 26;11:e76539. doi: 10.7554/eLife.76539 (PMC9106336; doi:10.7554/eLife.76539)
Supplement: Supplementary file 3. [file elife-76539-supp3.xlsx]

## Sheet: Ribotag_Up_GO
Supplementary data 3
NexCre Ribotag Gene Ontology analysis - upregulated genes
category	over_represented_pvalue	log 10 p value	under_represented_pvalue	numDEInCat	numInCat	term	ontology	DEGenes
GO:1903429	0.000130364	3.88484	0.999989	6	20	regulation of cell maturation	BP	Tcp11, Shb, Ret, Bcl11a, Gsk3b, Bcl2
GO:0031346	0.000325514	3.48743	0.999851	32	347	positive regulation of cell projection organization	BP	Rhoq, Fzd1, Hap1, Plxnc1, Islr2, Myo3b, Arsb, Dock11, Tgfb3, Cnr1, Ret, Ahi1, Grn, Gpm6a, Skil, Cdc42ep2, Bcl11a, Zeb2, Dscam, Atp8a2, Gsk3b, Scn1b, Pak3, Neurl1a, Cep120, Rapgef2, Trak1, Epha3, Atp7a, Cep135, Pcp4, Stau2
GO:0021761	0.000442984	3.35361	0.999896	11	68	limbic system development	BP	Hap1, Kirrel3, Tbr1, Nr2e1, Nrp2, Zbtb18, Zeb2, Gsk3b, Neurod6, Epha5, Emx2
GO:0021670	0.000501618	3.29963	0.999975	4	10	lateral ventricle development	BP	Dnah5, Dbi, Uchl5, Dpcd
GO:0120034	0.000801	3.09637	0.999795	11	76	positive regulation of plasma membrane bounded cell projection assembly	BP	Rhoq, Hap1, Myo3b, Dock11, Tgfb3, Gpm6a, Cdc42ep2, Neurl1a, Cep120, Atp7a, Cep135
GO:0021537	0.000990327	3.00422	0.99961	20	190	telencephalon development	BP	Cntn2, Kirrel3, Nfib, Trappc9, Tacc1, Nr2e1, Hprt, Nrp2, Dnah5, Zbtb18, Slc1a2, Dbi, Zeb2, Gsk3b, Uchl5, Neurod6, Dpcd, Cep120, Epha5, Emx2
GO:0009922	0.00112337	2.94948	0.999971	3	5	fatty acid elongase activity	MF	Elovl2, Elovl4, Elovl6
GO:0019367	0.00112337	2.94948	0.999971	3	5	fatty acid elongation, saturated fatty acid	BP	Elovl2, Elovl4, Elovl6
GO:0019368	0.00112337	2.94948	0.999971	3	5	fatty acid elongation, unsaturated fatty acid	BP	Elovl2, Elovl4, Elovl6
GO:0034625	0.00112337	2.94948	0.999971	3	5	fatty acid elongation, monounsaturated fatty acid	BP	Elovl2, Elovl4, Elovl6
GO:0034626	0.00112337	2.94948	0.999971	3	5	fatty acid elongation, polyunsaturated fatty acid	BP	Elovl2, Elovl4, Elovl6
GO:0102336	0.00112337	2.94948	0.999971	3	5	3-oxo-arachidoyl-CoA synthase activity	MF	Elovl2, Elovl4, Elovl6
GO:0102337	0.00112337	2.94948	0.999971	3	5	3-oxo-cerotoyl-CoA synthase activity	MF	Elovl2, Elovl4, Elovl6
GO:0102338	0.00112337	2.94948	0.999971	3	5	3-oxo-lignoceronyl-CoA synthase activity	MF	Elovl2, Elovl4, Elovl6
GO:0021954	0.00122445	2.91206	0.99967	11	74	central nervous system neuron development	BP	Cntn2, Nfib, Nanos1, Nr2e1, Hprt, Nrp2, Zeb2, Scn1b, Map2, Rapgef2, Atp7a
GO:0051491	0.00141199	2.85017	0.999796	6	27	positive regulation of filopodium assembly	BP	Rhoq, Myo3b, Dock11, Tgfb3, Gpm6a, Neurl1a
GO:0042761	0.00166337	2.77901	0.999942	3	6	very long-chain fatty acid biosynthetic process	BP	Elovl2, Elovl4, Elovl6
GO:0046978	0.00176559	2.75311	1	2	2	TAP1 binding	MF	Tap1, Tapbp
GO:0046979	0.00176559	2.75311	1	2	2	TAP2 binding	MF	Tap1, Tapbp
GO:0014041	0.00177665	2.7504	0.999864	4	12	regulation of neuron maturation	BP	Ret, Bcl11a, Gsk3b, Bcl2
53	0.00193368	2.71362	0.999922	3	7	Ascorbate and aldarate metabolism	KEGG	Aldh7a1, Aldh3a2, Aldh9a1
GO:0004029	0.00203364	2.69173	0.999831	4	14	aldehyde dehydrogenase (NAD) activity	MF	Aldh7a1, Aldh3a2, Aldh9a1, Aldh4a1
GO:0061564	0.00217056	2.66343	0.998881	32	384	axon development	BP	Nefm, Nrn1, Cntn2, Plxnc1, Islr2, Jun, Ust, Nfib, Lama2, Lgi1, Cnr1, Tbr1, Ret, Nr2e1, Nrp2, Skil, Ptpro, Dst, Bcl11a, Zeb2, Dscam, Atp8a2, Gsk3b, Scn1b, Map2, Pak3, Slc9a6, Inpp5f, Bcl2, Trak1, Epha3, Epha5
GO:0048812	0.00219788	2.658	0.998769	41	523	neuron projection morphogenesis	BP	Nyap2, Nefm, Nrn1, Cntn2, Plxnc1, Islr2, Ust, Kirrel3, Nfib, Lama2, Kndc1, Lgi1, Tbr1, Ret, Nr2e1, Flrt1, Lifr, Hprt, Nrp2, Gpm6a, Skil, Ptpro, Dst, Bcl11a, Zeb2, Dscam, Atp8a2, Gsk3b, Scn1b, Map2, Pak3, Slc9a6, Sdc2, Bcl2, Rapgef2, Trak1, Epha5, Atp7a, Impact, Postn, Stau2
GO:0030497	0.00230634	2.63708	0.999901	3	7	fatty acid elongation	BP	Elovl2, Elovl4, Elovl6
GO:0031953	0.00250124	2.60185	0.999889	3	7	negative regulation of protein autophosphorylation	BP	Jun, Impact, Chp1
GO:0010769	0.00260156	2.58477	0.998785	24	265	regulation of cell morphogenesis involved in differentiation	BP	Nefm, Cntn2, Plxnc1, Islr2, Ust, Kndc1, Olfm4, Tbr1, Ret, Nr2e1, Skil, Bcl11a, Zeb2, Dscam, Gsk3b, Map2, Pak3, Sdc2, Rapgef2, Trak1, Mapk9, Dock5, Postn, Stau2
GO:0051489	0.00287102	2.54196	0.999418	7	41	regulation of filopodium assembly	BP	Rhoq, Myo3b, Dock11, Tgfb3, Gpm6a, Neurl1a, Stau2
GO:0050662	0.00292341	2.53411	0.998945	14	153	coenzyme binding	MF	Gch1, Cryl1, Aifm3, Gsr, Hadh, Acot7, Dbi, Hibadh, Cyb5r3, Cat, Aldh9a1, Gclc, Mical2, Sqle
GO:0021591	0.00295393	2.5296	0.999502	6	28	ventricular system development	BP	Cenpf, Dnah5, Dbi, Uchl5, Dpcd, Rapgef2
GO:0006811	0.00308964	2.51009	0.998036	62	978	ion transport	BP	Cacng5, Osbpl8, Hap1, Nipal3, Slc43a2, Kcnc4, Slc4a8, Stim1, Hrh3, Glrx, Gabrq, Slc9a9, Trpm3, Wfs1, Trdn, Ank1, Cnr1, Mmgt1, Slc16a6, Cacnb4, Ndfip2, Slco5a1, Gabra3, Clcn3, Slc17a8, Cacnb3, Fam155a, Mcur1, Slc1a2, Dbi, Wnk1, Pkd2l2, Kcna3, Sv2a, Atp8a2, Scn1b, Chrna1, Ank2, Kcnk10, Tusc3, Slc9a6, Slc8a3, Ano10, Micu2, Atp6v1g2, Bcl2, Slc15a4, Gabrg2, Mapk9, Kcnj11, Ppargc1a, Slc17a6, Acsl3, Atp…
GO:0120039	0.00322225	2.49184	0.998154	41	535	plasma membrane bounded cell projection morphogenesis	BP	Nyap2, Nefm, Nrn1, Cntn2, Plxnc1, Islr2, Ust, Kirrel3, Nfib, Lama2, Kndc1, Lgi1, Tbr1, Ret, Nr2e1, Flrt1, Lifr, Hprt, Nrp2, Gpm6a, Skil, Ptpro, Dst, Bcl11a, Zeb2, Dscam, Atp8a2, Gsk3b, Scn1b, Map2, Pak3, Slc9a6, Sdc2, Bcl2, Rapgef2, Trak1, Epha5, Atp7a, Impact, Postn, Stau2
GO:1903430	0.00322427	2.49157	0.999833	3	8	negative regulation of cell maturation	BP	Shb, Bcl11a, Gsk3b
GO:0045923	0.00340074	2.46843	0.999521	5	25	positive regulation of fatty acid metabolic process	BP	Ghsr, Nucb2, Irs1, Mapk9, Ppargc1a
GO:2000173	0.00341326	2.46683	0.99996	2	3	negative regulation of branching morphogenesis of a nerve	BP	Bcl11a, Cpe
GO:0021730	0.00344892	2.46232	1	2	2	trigeminal sensory nucleus development	BP	Kirrel3, Nfib
GO:0021740	0.00344892	2.46232	1	2	2	principal sensory nucleus of trigeminal nerve development	BP	Kirrel3, Nfib
GO:0046847	0.00346473	2.46033	0.999168	8	53	filopodium assembly	BP	Rhoq, Myo3b, Dock11, Tgfb3, Gpm6a, Neurl1a, Spata13, Stau2
GO:0048858	0.00365348	2.43729	0.997891	41	539	cell projection morphogenesis	BP	Nyap2, Nefm, Nrn1, Cntn2, Plxnc1, Islr2, Ust, Kirrel3, Nfib, Lama2, Kndc1, Lgi1, Tbr1, Ret, Nr2e1, Flrt1, Lifr, Hprt, Nrp2, Gpm6a, Skil, Ptpro, Dst, Bcl11a, Zeb2, Dscam, Atp8a2, Gsk3b, Scn1b, Map2, Pak3, Slc9a6, Sdc2, Bcl2, Rapgef2, Trak1, Epha5, Atp7a, Impact, Postn, Stau2
GO:0030900	0.00372547	2.42882	0.998179	25	282	forebrain development	BP	Cntn2, Hap1, Kirrel3, Nfib, Trappc9, Tacc1, Tbr1, Nr2e1, Hprt, Nrp2, Dnah5, Zbtb18, Slc1a2, Dbi, Zeb2, Gsk3b, Uchl5, Neurod6, Dpcd, Chd5, Cep120, Rapgef2, Epha5, Atp7a, Emx2
380	0.00376618	2.4241	0.999453	5	26	Tryptophan metabolism	KEGG	Hadh, Aldh7a1, Aldh3a2, Cat, Aldh9a1
GO:0046320	0.00382562	2.4173	0.999443	5	26	regulation of fatty acid oxidation	BP	Cnr1, Nucb2, Dbi, Irs1, Ppargc1a
GO:0021766	0.00384232	2.41541	0.999063	8	52	hippocampus development	BP	Kirrel3, Nr2e1, Zbtb18, Zeb2, Gsk3b, Neurod6, Epha5, Emx2
GO:0090278	0.00417502	2.37934	0.999082	7	47	negative regulation of peptide hormone secretion	BP	Ghsr, Anxa5, Ndufaf2, Hadh, Nucb2, Irs1, Kcnj11
GO:0015075	0.00424803	2.37181	0.997557	39	565	ion transmembrane transporter activity	MF	Cacng5, Nipal3, Slc43a2, Kcnc4, Slc4a8, Stim1, Gabrq, Slc9a9, Trpm3, Mmgt1, Anxa5, Slc16a6, Cacnb4, Slco5a1, Gabra3, Clcn3, Slc17a8, Cacnb3, Fam155a, Gpm6a, Slc1a2, Pkd2l2, Kcna3, Scn1b, Chrna1, Kcnk10, Tusc3, Slc9a6, Slc8a3, Ano10, Atp6v1g2, Slc15a4, Gabrg2, Kcnj11, Slc17a6, Atp7a, Kcnj16, Slc36a1, Ryr1
GO:0090158	0.00445897	2.35077	0.999941	2	3	endoplasmic reticulum membrane organization	BP	Trdn, Stx18
GO:0045744	0.00477357	2.32116	0.999078	6	39	negative regulation of G-protein coupled receptor protein signaling pathway	BP	Rgs13, Ly6g6e, Rgs5, Ubqln2, Ywhab, Gprasp1
GO:0015038	0.00484507	2.3147	0.999905	2	4	glutathione disulfide oxidoreductase activity	MF	Glrx, Gsr
GO:0071372	0.00492074	2.30797	0.999721	3	7	cellular response to follicle-stimulating hormone stimulus	BP	Ppargc1a, Epha3, Epha5
GO:0120035	0.00534965	2.27167	0.996838	41	570	regulation of plasma membrane bounded cell projection organization	BP	Rhoq, Nefm, Cntn2, Fzd1, Hap1, Plxnc1, Islr2, Ust, Myo3b, Kndc1, Arsb, Dock11, Tgfb3, Cnr1, Tbr1, Ret, Nr2e1, Ahi1, Grn, Gpm6a, Skil, Cdc42ep2, Bcl11a, Zeb2, Dscam, Atp8a2, Gsk3b, Scn1b, Map2, Pak3, Neurl1a, Sdc2, Inpp5f, Cep120, Rapgef2, Trak1, Epha3, Atp7a, Cep135, Pcp4, Stau2
GO:0045834	0.00542894	2.26528	0.998303	10	91	positive regulation of lipid metabolic process	BP	Ghsr, Vav2, Nucb2, Dbi, Abhd5, Irs1, Mapk9, Ppargc1a, Acsl3, Ccdc3
GO:0000904	0.00558238	2.25318	0.996651	43	585	cell morphogenesis involved in differentiation	BP	Nefm, Nrn1, Cntn2, Spr, Plxnc1, Islr2, Ust, Myo3b, Nfib, Lama2, Kndc1, Olfm4, Lgi1, Tbr1, Ret, Nr2e1, Hprt, Nrp2, Parva, Skil, Ptpro, Fermt2, Dst, Bcl11a, Zeb2, Dscam, Atp8a2, Gsk3b, Scn1b, Map2, Radil, Pak3, Slc9a6, Sdc2, Bcl2, Rapgef2, Trak1, Mapk9, Dock5, Epha5, Atp7a, Postn, Stau2
GO:0032990	0.00561934	2.25032	0.996669	41	558	cell part morphogenesis	BP	Nyap2, Nefm, Nrn1, Cntn2, Plxnc1, Islr2, Ust, Kirrel3, Nfib, Lama2, Kndc1, Lgi1, Tbr1, Ret, Nr2e1, Flrt1, Lifr, Hprt, Nrp2, Gpm6a, Skil, Ptpro, Dst, Bcl11a, Zeb2, Dscam, Atp8a2, Gsk3b, Scn1b, Map2, Pak3, Slc9a6, Sdc2, Bcl2, Rapgef2, Trak1, Epha5, Atp7a, Impact, Postn, Stau2
GO:0004312	0.00592748	2.22713	0.999617	3	8	fatty acid synthase activity	MF	Elovl2, Elovl4, Elovl6
GO:0021953	0.00605521	2.21787	0.997546	15	147	central nervous system neuron differentiation	BP	Cntn2, Nfib, Kndc1, Nanos1, Tbr1, Nr2e1, Faim2, Hprt, Nrp2, Zeb2, Scn1b, Map2, Chd5, Rapgef2, Atp7a
GO:0031344	0.00612908	2.2126	0.996346	41	575	regulation of cell projection organization	BP	Rhoq, Nefm, Cntn2, Fzd1, Hap1, Plxnc1, Islr2, Ust, Myo3b, Kndc1, Arsb, Dock11, Tgfb3, Cnr1, Tbr1, Ret, Nr2e1, Ahi1, Grn, Gpm6a, Skil, Cdc42ep2, Bcl11a, Zeb2, Dscam, Atp8a2, Gsk3b, Scn1b, Map2, Pak3, Neurl1a, Sdc2, Inpp5f, Cep120, Rapgef2, Trak1, Epha3, Atp7a, Cep135, Pcp4, Stau2
GO:0006812	0.00621299	2.2067	0.996178	46	708	cation transport	BP	Cacng5, Hap1, Nipal3, Kcnc4, Slc4a8, Stim1, Hrh3, Glrx, Slc9a9, Trpm3, Wfs1, Trdn, Ank1, Cnr1, Mmgt1, Cacnb4, Ndfip2, Slc17a8, Cacnb3, Fam155a, Mcur1, Dbi, Wnk1, Kcna3, Scn1b, Chrna1, Ank2, Kcnk10, Tusc3, Slc9a6, Slc8a3, Ano10, Micu2, Atp6v1g2, Bcl2, Slc15a4, Kcnj11, Ppargc1a, Slc17a6, Atp7a, Kcnj16, Pcp4, Slc36a1, Nsf, Chp1, Ryr1
GO:0022891	0.00623733	2.205	0.996298	40	603	substrate-specific transmembrane transporter activity	MF	Cacng5, Nipal3, Slc43a2, Kcnc4, Slc4a8, Stim1, Tap1, Gabrq, Slc9a9, Trpm3, Mmgt1, Anxa5, Slc16a6, Cacnb4, Slco5a1, Gabra3, Clcn3, Slc17a8, Cacnb3, Fam155a, Gpm6a, Slc1a2, Pkd2l2, Kcna3, Scn1b, Chrna1, Kcnk10, Tusc3, Slc9a6, Slc8a3, Ano10, Atp6v1g2, Slc15a4, Gabrg2, Kcnj11, Slc17a6, Atp7a, Kcnj16, Slc36a1, Ryr1
GO:0090327	0.00636904	2.19593	0.999898	2	3	negative regulation of locomotion involved in locomotory behavior	BP	Ghsr, Arrdc3
GO:0018958	0.00648323	2.18821	0.998249	8	63	phenol-containing compound metabolic process	BP	Gch1, Spr, Hprt, Zeb2, Sncb, Bcl2, Rapgef2, Atp7a
GO:0036042	0.00659216	2.18097	0.999848	2	4	long-chain fatty acyl-CoA binding	MF	Acot7, Dbi
GO:0015179	0.00662112	2.17907	0.998637	6	37	L-amino acid transmembrane transporter activity	MF	Slc43a2, Slc17a8, Slc1a2, Slc15a4, Slc17a6, Slc36a1
GO:0030182	0.00702629	2.15327	0.995257	69	1083	neuron differentiation	BP	Nyap2, Zhx2, Nefm, Nrn1, Cntn2, Fzd1, Hap1, Spr, Plxnc1, Islr2, Jun, Ust, Hipk1, Kirrel3, Myo3b, Nfib, Lama2, Kndc1, Arsb, Trappc9, Stat3, Lgi1, Myt1l, Nanos1, Cnr1, Tbr1, Ret, Nr2e1, Flrt1, Crb1, Faim2, Lifr, Hprt, Ahi1, Nrp2, Zbtb18, Grn, Gpm6a, Skil, Ptpro, Dst, Bcl11a, Zeb2, Dscam, Atp8a2, Gsk3b, Scn1b, Bend6, Map2, Pak3, Neurl1a, Slc9a6, Sdc2, Inpp5f, Chd5, Bcl2, Rapgef2, Trak1, Mapk9, Epha3…
GO:0022857	0.00731639	2.1357	0.99553	43	662	transmembrane transporter activity	MF	Cacng5, Nipal3, Slc43a2, Kcnc4, Slc4a8, Stim1, Tap1, Gabrq, Slc9a9, Trpm3, Mmgt1, Anxa5, Slc16a6, Cacnb4, Slco5a1, Gabra3, Clcn3, Slc17a8, Cacnb3, Fam155a, Slc18b1, Gpm6a, Slc1a2, Pkd2l2, Kcna3, Sv2a, Scn1b, Chrna1, Kcnk10, Tusc3, Slc9a6, Slc8a3, Ano10, Atp6v1g2, Bcl2, Slc15a4, Gabrg2, Kcnj11, Slc17a6, Atp7a, Kcnj16, Slc36a1, Ryr1
GO:0032409	0.00759126	2.11969	0.996729	16	179	regulation of transporter activity	BP	Cacng5, Hap1, Stim1, Glrx, Trdn, Cacnb4, Ndfip2, Cacnb3, Scn1b, Ank2, Bcl2, Kcnj11, Ppargc1a, Atp7a, Gopc, Chp1
GO:0045666	0.00771594	2.11261	0.99588	27	344	positive regulation of neuron differentiation	BP	Fzd1, Hap1, Plxnc1, Islr2, Arsb, Cnr1, Ret, Ahi1, Grn, Skil, Bcl11a, Zeb2, Dscam, Atp8a2, Gsk3b, Scn1b, Bend6, Pak3, Neurl1a, Bcl2, Rapgef2, Trak1, Epha3, Nap1l2, Impact, Pcp4, Stau2
GO:0032354	0.00772762	2.11195	0.99945	3	8	response to follicle-stimulating hormone	BP	Ppargc1a, Epha3, Epha5
GO:0065001	0.00783447	2.10599	0.99986	2	3	specification of axis polarity	BP	Ahi1, Bcor
GO:0042417	0.00792686	2.1009	0.998601	5	30	dopamine metabolic process	BP	Gch1, Spr, Hprt, Sncb, Atp7a
GO:0048037	0.00798058	2.09797	0.996527	16	209	cofactor binding	MF	Gch1, Cryl1, Aifm3, Gsr, Hadh, Acot7, Dbi, Creg1, Hibadh, Cyb5r3, Uros, Cat, Aldh9a1, Gclc, Mical2, Sqle
GO:0048667	0.00801906	2.09588	0.995307	36	479	cell morphogenesis involved in neuron differentiation	BP	Nefm, Nrn1, Cntn2, Spr, Plxnc1, Islr2, Ust, Myo3b, Nfib, Lama2, Kndc1, Lgi1, Tbr1, Ret, Nr2e1, Hprt, Nrp2, Skil, Ptpro, Dst, Bcl11a, Zeb2, Dscam, Atp8a2, Gsk3b, Scn1b, Map2, Pak3, Slc9a6, Sdc2, Bcl2, Rapgef2, Trak1, Epha5, Atp7a, Stau2
GO:0022890	0.00804746	2.09434	0.995683	27	364	inorganic cation transmembrane transporter activity	MF	Cacng5, Nipal3, Kcnc4, Slc4a8, Stim1, Slc9a9, Mmgt1, Anxa5, Cacnb4, Cacnb3, Fam155a, Gpm6a, Slc1a2, Pkd2l2, Kcna3, Scn1b, Chrna1, Kcnk10, Tusc3, Slc9a6, Slc8a3, Atp6v1g2, Kcnj11, Atp7a, Kcnj16, Slc36a1, Ryr1
GO:0021895	0.00821863	2.0852	0.998918	4	19	cerebral cortex neuron differentiation	BP	Cntn2, Nr2e1, Hprt, Chd5
71	0.00823232	2.08448	0.998524	5	32	Fatty acid degradation	KEGG	Hadh, Aldh7a1, Aldh3a2, Aldh9a1, Acsl3
GO:0006767	0.00828286	2.08182	0.998891	4	21	water-soluble vitamin metabolic process	BP	Tpk1, Mmab, Pdxp, Gclc
GO:0022008	0.00868233	2.06136	0.993951	78	1262	neurogenesis	BP	Nyap2, Zhx2, Nefm, Nrn1, Cntn2, Fzd1, Hap1, Spr, Hdac11, Plxnc1, Islr2, Jun, Ust, Hipk1, Kirrel3, Myo3b, Nfib, Lama2, Kndc1, Arsb, Trappc9, Tacc1, Stat3, Lgi1, Myt1l, Nanos1, Cnr1, Tbr1, Ret, Nr2e1, Flrt1, Crb1, Faim2, Lifr, Hprt, Ahi1, Xrcc5, Nrp2, Zbtb18, Grn, Nav1, Gpm6a, Skil, Ptpro, Dst, Dbi, Bcl11a, Zeb2, Dscam, Atp8a2, Gsk3b, Scn1b, Bend6, Map2, Pak3, Neurl1a, Slc9a6, Sdc2, Nhsl1, Slc8a3, …
GO:0010976	0.00892275	2.0495	0.995445	23	279	positive regulation of neuron projection development	BP	Fzd1, Hap1, Plxnc1, Islr2, Arsb, Cnr1, Ret, Ahi1, Grn, Skil, Bcl11a, Zeb2, Dscam, Atp8a2, Gsk3b, Scn1b, Pak3, Neurl1a, Rapgef2, Trak1, Epha3, Pcp4, Stau2
GO:0007409	0.00910341	2.0408	0.995016	28	355	axonogenesis	BP	Nefm, Nrn1, Cntn2, Plxnc1, Islr2, Ust, Nfib, Lama2, Lgi1, Tbr1, Ret, Nr2e1, Nrp2, Skil, Ptpro, Dst, Bcl11a, Zeb2, Dscam, Atp8a2, Gsk3b, Scn1b, Map2, Pak3, Slc9a6, Bcl2, Trak1, Epha5
GO:0043368	0.00946205	2.02401	0.998713	4	18	positive T cell selection	BP	Themis, Stat3, H2-DMa, Bcl2
GO:0008324	0.0103694	1.98425	0.994128	30	428	cation transmembrane transporter activity	MF	Cacng5, Nipal3, Kcnc4, Slc4a8, Stim1, Slc9a9, Trpm3, Mmgt1, Anxa5, Cacnb4, Cacnb3, Fam155a, Gpm6a, Slc1a2, Pkd2l2, Kcna3, Scn1b, Chrna1, Kcnk10, Tusc3, Slc9a6, Slc8a3, Ano10, Atp6v1g2, Slc15a4, Kcnj11, Atp7a, Kcnj16, Slc36a1, Ryr1
GO:0022898	0.0108671	1.96388	0.995269	15	169	regulation of transmembrane transporter activity	BP	Cacng5, Hap1, Stim1, Glrx, Trdn, Cacnb4, Cacnb3, Scn1b, Ank2, Bcl2, Kcnj11, Ppargc1a, Atp7a, Gopc, Chp1
GO:0019217	0.0108933	1.96284	0.997086	7	58	regulation of fatty acid metabolic process	BP	Ghsr, Cnr1, Nucb2, Dbi, Irs1, Mapk9, Ppargc1a
GO:0046873	0.0109724	1.9597	0.994205	24	298	metal ion transmembrane transporter activity	MF	Cacng5, Nipal3, Kcnc4, Slc4a8, Stim1, Slc9a9, Mmgt1, Anxa5, Cacnb4, Cacnb3, Fam155a, Gpm6a, Slc1a2, Pkd2l2, Kcna3, Scn1b, Kcnk10, Tusc3, Slc9a6, Slc8a3, Kcnj11, Atp7a, Kcnj16, Ryr1
GO:1901215	0.0110708	1.95582	0.995164	15	176	negative regulation of neuron death	BP	Fzd1, Optn, Jun, Wfs1, Cntfr, Stat3, Tgfb3, Faim2, Gsk3b, Sncb, Bcl2, Ppargc1a, Gclc, Atp7a, Pcp4
GO:0004181	0.0114775	1.94015	0.998952	3	11	metallocarboxypeptidase activity	MF	Cpxm2, Agbl4, Cpe
GO:0014043	0.0115109	1.93889	0.999645	2	4	negative regulation of neuron maturation	BP	Bcl11a, Gsk3b
GO:0010891	0.0115133	1.9388	0.999645	2	4	negative regulation of sequestering of triglyceride	BP	Osbpl8, Abhd5
GO:0048666	0.0117287	1.93075	0.992109	59	915	neuron development	BP	Nyap2, Nefm, Nrn1, Cntn2, Fzd1, Hap1, Spr, Plxnc1, Islr2, Jun, Ust, Kirrel3, Myo3b, Nfib, Lama2, Kndc1, Arsb, Lgi1, Myt1l, Nanos1, Cnr1, Tbr1, Ret, Nr2e1, Flrt1, Crb1, Lifr, Hprt, Ahi1, Nrp2, Zbtb18, Grn, Gpm6a, Skil, Ptpro, Dst, Bcl11a, Zeb2, Dscam, Atp8a2, Gsk3b, Scn1b, Map2, Pak3, Neurl1a, Slc9a6, Sdc2, Inpp5f, Bcl2, Rapgef2, Trak1, Mapk9, Epha3, Epha5, Atp7a, Impact, Pcp4, Postn, Stau2
GO:0050770	0.0119143	1.92393	0.994767	15	159	regulation of axonogenesis	BP	Nefm, Cntn2, Plxnc1, Islr2, Ust, Tbr1, Ret, Skil, Bcl11a, Zeb2, Dscam, Gsk3b, Map2, Pak3, Trak1
GO:0097164	0.0120716	1.91824	0.99572	10	107	ammonium ion metabolic process	BP	Gch1, Spr, Hprt, Dbi, Sncb, Kdsr, Aldh9a1, Acsl3, Atp7a, Odc1
GO:0071371	0.0122254		0.998886	3	10	cellular response to gonadotropin stimulus	BP	Ppargc1a, Epha3, Epha5
GO:0000982	0.0123774		0.993695	21	265	transcription factor activity, RNA polymerase II core promoter proximal region sequence-specific binding	MF	Jun, Tead1, Nfib, Stat3, Nacc2, Myt1l, Creb5, Nr2e1, Zbtb20, Camta1, Skil, Nfia, Cys1, Bcl11a, Nkrf, Meis2, Neurod6, Sp3, Nr2c2, Tshz1, Pbx1
GO:0005313	0.012393		0.998865	3	10	L-glutamate transmembrane transporter activity	MF	Slc17a8, Slc1a2, Slc17a6
GO:0015172	0.012393		0.998865	3	10	acidic amino acid transmembrane transporter activity	MF	Slc17a8, Slc1a2, Slc17a6
GO:0030154	0.0126853		0.990284	144	2644	cell differentiation	BP	Sostdc1, Themis, Peg10, Nyap2, Zhx2, Nefm, Nrn1, Osbpl8, Txnip, Cntn2, Fzd1, Sla, Hap1, Spr, Hdac11, Plxnc1, Stim1, Fbxo9, Islr2, Jun, Ust, Hipk1, Nxn, Kirrel3, Myo3b, Nfib, Tcp11, Lama2, Kndc1, Morc1, Arsb, Shb, Dock11, Trappc9, Ank1, Tacc1, Nup93, Olfm4, Stat3, Lgi1, Scel, Myt1l, Tgfb3, Nanos1, Creb5, Cnr1, Tbr1, Ret, Cacnb4, Nr2e1, Flrt1, Crb1, Meig1, Faim2, Lifr, Hprt, Ahi1, Xrcc5, Nrp2, Parv…
GO:0006851	0.0127167		0.998769	3	12	mitochondrial calcium ion transmembrane transport	BP	Mcur1, Slc8a3, Micu2
GO:0006729	0.0129441		0.999467	2	6	tetrahydrobiopterin biosynthetic process	BP	Gch1, Spr
GO:0046146	0.0129441		0.999467	2	6	tetrahydrobiopterin metabolic process	BP	Gch1, Spr
GO:0048699	0.0129587		0.990898	73	1188	generation of neurons	BP	Nyap2, Zhx2, Nefm, Nrn1, Cntn2, Fzd1, Hap1, Spr, Plxnc1, Islr2, Jun, Ust, Hipk1, Kirrel3, Myo3b, Nfib, Lama2, Kndc1, Arsb, Trappc9, Stat3, Lgi1, Myt1l, Nanos1, Cnr1, Tbr1, Ret, Nr2e1, Flrt1, Crb1, Faim2, Lifr, Hprt, Ahi1, Xrcc5, Nrp2, Zbtb18, Grn, Nav1, Gpm6a, Skil, Ptpro, Dst, Bcl11a, Zeb2, Dscam, Atp8a2, Gsk3b, Scn1b, Bend6, Map2, Pak3, Neurl1a, Slc9a6, Sdc2, Nhsl1, Inpp5f, Chd5, Bcl2, Rapgef2,…
GO:1903136	0.0130324		0.999461	2	6	cuprous ion binding	MF	Sncb, Atp7a
GO:0045657	0.0130969		0.9995	2	5	positive regulation of monocyte differentiation	BP	Jun, Ctnnbip1
GO:0004897	0.0134258		0.999551	2	4	ciliary neurotrophic factor receptor activity	MF	Cntfr, Lifr
GO:0070120	0.0134258		0.999551	2	4	ciliary neurotrophic factor-mediated signaling pathway	BP	Cntfr, Lifr
GO:0016209	0.0134355		0.997211	5	44	antioxidant activity	MF	Gpx8, Nxn, Gsr, Trp53inp1, Cat
GO:0031175	0.0135421		0.990974	54	828	neuron projection development	BP	Nyap2, Nefm, Nrn1, Cntn2, Fzd1, Hap1, Plxnc1, Islr2, Jun, Ust, Kirrel3, Myo3b, Nfib, Lama2, Kndc1, Arsb, Lgi1, Cnr1, Tbr1, Ret, Nr2e1, Flrt1, Lifr, Hprt, Ahi1, Nrp2, Grn, Gpm6a, Skil, Ptpro, Dst, Bcl11a, Zeb2, Dscam, Atp8a2, Gsk3b, Scn1b, Map2, Pak3, Neurl1a, Slc9a6, Sdc2, Inpp5f, Bcl2, Rapgef2, Trak1, Mapk9, Epha3, Epha5, Atp7a, Impact, Pcp4, Postn, Stau2
280	0.0138007		0.99714	5	39	Valine, leucine and isoleucine degradation	KEGG	Hadh, Hibadh, Aldh7a1, Aldh3a2, Aldh9a1
GO:0043524	0.0140867		0.994329	12	134	negative regulation of neuron apoptotic process	BP	Optn, Jun, Wfs1, Cntfr, Tgfb3, Faim2, Sncb, Bcl2, Ppargc1a, Gclc, Atp7a, Pcp4
GO:0030156	0.014216		1	1	1	benzodiazepine receptor binding	MF	Dbi
GO:0004028	0.0144335		0.99942	2	5	3-chloroallyl aldehyde dehydrogenase activity	MF	Aldh3a2, Aldh9a1
GO:0042428	0.0146855		0.998529	3	11	serotonin metabolic process	BP	Gch1, Spr, Atp7a
GO:0046888	0.0150505		0.995706	7	59	negative regulation of hormone secretion	BP	Ghsr, Anxa5, Ndufaf2, Hadh, Nucb2, Irs1, Kcnj11
GO:0022604	0.0152799		0.991173	29	394	regulation of cell morphogenesis	BP	Rhoq, Nefm, Cntn2, Plxnc1, Islr2, Ust, Kndc1, Olfm4, Tbr1, Ret, Nr2e1, Parva, Skil, Fermt2, Cdc42ep2, Bcl11a, Zeb2, Dscam, Gsk3b, Map2, Pak3, Sdc2, Rapgef2, Trak1, Mapk9, Dock5, Postn, Stau2, Cdc42se1
GO:0060401	0.0155066		0.993987	11	109	cytosolic calcium ion transport	BP	Hap1, Trdn, Cacnb3, Fam155a, Mcur1, Dbi, Ank2, Slc8a3, Micu2, Bcl2, Ryr1
GO:0031987	0.0158536		0.998333	3	12	locomotion involved in locomotory behavior	BP	Ghsr, Arrdc3, Rcan1
GO:2000143	0.0159328		0.999325	2	5	negative regulation of DNA-templated transcription, initiation	BP	Morc1, Ctnnbip1
GO:0036015	0.0160935		0.999407	2	4	response to interleukin-3	BP	Gsk3b, Jak1
GO:0036016	0.0160935		0.999407	2	4	cellular response to interleukin-3	BP	Gsk3b, Jak1
GO:0048021	0.0163868		0.99939	2	4	regulation of melanin biosynthetic process	BP	Zeb2, Rapgef2
GO:1900376	0.0163868		0.99939	2	4	regulation of secondary metabolite biosynthetic process	BP	Zeb2, Rapgef2
GO:0007631	0.0165575		0.994669	8	76	feeding behavior	BP	Ghsr, Hrh3, Prokr2, Cntfr, Stat3, Cnr1, Tbr1, Atp8a2
GO:0048468	0.0167267		0.98771	91	1551	cell development	BP	Nyap2, Zhx2, Nefm, Nrn1, Cntn2, Fzd1, Hap1, Spr, Hdac11, Plxnc1, Islr2, Jun, Ust, Kirrel3, Myo3b, Nfib, Tcp11, Lama2, Kndc1, Arsb, Shb, Ank1, Nup93, Olfm4, Stat3, Lgi1, Myt1l, Tgfb3, Nanos1, Cnr1, Tbr1, Ret, Cacnb4, Nr2e1, Flrt1, Crb1, Lifr, Hprt, Ahi1, Xrcc5, Nrp2, Parva, Zbtb18, Grn, Gpm6a, Skil, Cbfb, Ptpro, Fermt2, Dst, Smyd3, Bcl11a, Zeb2, Dscam, Atp8a2, Gsk3b, Scn1b, Bend6, Map2, Ank2, Radi…
GO:0034698	0.0167661		0.998235	3	11	response to gonadotropin	BP	Ppargc1a, Epha3, Epha5
GO:0090325	0.0168121		0.999267	2	5	regulation of locomotion involved in locomotory behavior	BP	Ghsr, Arrdc3
GO:0046977	0.0168701		0.9992	2	6	TAP binding	MF	Tap1, Tapbp
GO:0015693	0.0169112		0.998148	3	13	magnesium ion transport	BP	Nipal3, Mmgt1, Tusc3
GO:0031999	0.0171682		0.999243	2	5	negative regulation of fatty acid beta-oxidation	BP	Cnr1, Dbi
GO:0019885	0.0173551		0.999164	2	6	antigen processing and presentation of endogenous peptide antigen via MHC class I	BP	Tap1, Tapbp
GO:0002399	0.0174111		1	1	1	MHC class II protein complex assembly	BP	H2-DMa
GO:0002503	0.0174111		1	1	1	peptide antigen assembly with MHC class II protein complex	BP	H2-DMa
GO:0007214	0.0174697		0.997066	4	22	gamma-aminobutyric acid signaling pathway	BP	Gabrq, Cacnb4, Gabra3, Gabrg2
GO:0050994	0.0175772		0.996161	5	35	regulation of lipid catabolic process	BP	Cnr1, Bscl2, Dbi, Abhd5, Irs1
GO:0007399	0.0176397		0.986866	99	1702	nervous system development	BP	Ghsr, Nyap2, Zhx2, Nefm, Nrn1, Pcdh17, Pcdh8, Cntn2, Fzd1, Hap1, Spr, Hdac11, Plxnc1, Islr2, Jun, Ust, Hipk1, Kirrel3, Myo3b, Nfib, Lama2, Pcdhb1, Kndc1, Cenpf, Arsb, Trappc9, Tacc1, Stat3, Lgi1, Myt1l, Nanos1, Cnr1, Tbr1, Ret, Nr2e1, Flrt1, Crb1, Faim2, Lifr, Hprt, Ahi1, Xrcc5, Nrp2, Dnah5, Zbtb18, Rbfox1, Grn, Nav1, Gpm6a, Skil, Ptpro, Slc1a2, Nfia, Dst, Dbi, Bcl11a, Zeb2, Dscam, Atp8a2, Gsk3b,…
GO:0006584	0.0180576		0.996011	5	37	catecholamine metabolic process	BP	Gch1, Spr, Hprt, Sncb, Atp7a
GO:0009712	0.0180576		0.996011	5	37	catechol-containing compound metabolic process	BP	Gch1, Spr, Hprt, Sncb, Atp7a
GO:0072509	0.0181523		0.992147	13	135	divalent inorganic cation transmembrane transporter activity	MF	Cacng5, Nipal3, Stim1, Mmgt1, Anxa5, Cacnb4, Cacnb3, Fam155a, Gpm6a, Pkd2l2, Tusc3, Slc8a3, Ryr1
GO:1901160	0.0183947		0.997954	3	12	primary amino compound metabolic process	BP	Gch1, Spr, Atp7a
GO:0000902	0.0189663		0.987199	52	799	cell morphogenesis	BP	Rhoq, Nyap2, Nefm, Nrn1, Cntn2, Spr, Plxnc1, Islr2, Ust, Kirrel3, Myo3b, Nfib, Lama2, Kndc1, Olfm4, Lgi1, Tbr1, Ret, Nr2e1, Flrt1, Lifr, Hprt, Nrp2, Parva, Gpm6a, Skil, Ptpro, Fermt2, Dst, Cdc42ep2, Bcl11a, Zeb2, Dscam, Atp8a2, Gsk3b, Scn1b, Map2, Radil, Pak3, Slc9a6, Sdc2, Bcl2, Rapgef2, Trak1, Mapk9, Dock5, Epha5, Atp7a, Impact, Postn, Stau2, Cdc42se1
330	0.0193176		0.995619	5	42	Arginine and proline metabolism	KEGG	Aldh7a1, Aldh3a2, Aldh9a1, Odc1, Aldh4a1
GO:1901021	0.0198057		0.996565	4	21	positive regulation of calcium ion transmembrane transporter activity	BP	Hap1, Stim1, Trdn, Ank2
GO:0046321	0.0199085		0.997649	3	14	positive regulation of fatty acid oxidation	BP	Nucb2, Irs1, Ppargc1a
GO:0015095	0.0200446		0.997627	3	14	magnesium ion transmembrane transporter activity	MF	Nipal3, Mmgt1, Tusc3
GO:0120032	0.0202501		0.991424	12	134	regulation of plasma membrane bounded cell projection assembly	BP	Rhoq, Hap1, Myo3b, Dock11, Tgfb3, Gpm6a, Cdc42ep2, Neurl1a, Cep120, Atp7a, Cep135, Stau2
GO:0032412	0.0203068		0.990739	14	165	regulation of ion transmembrane transporter activity	BP	Cacng5, Hap1, Stim1, Glrx, Trdn, Cacnb4, Cacnb3, Scn1b, Ank2, Kcnj11, Ppargc1a, Atp7a, Gopc, Chp1
GO:0007268	0.0206529		0.987327	33	488	chemical synaptic transmission	BP	Pcdh17, Pcdh8, Cntn2, Hap1, Kcnc4, Prokr2, Plat, Lama2, Pcdhb1, Lgi1, Cnr1, Cacnb4, Nr2e1, Gabra3, Clcn3, Cacnb3, Syt13, Cadps, Dbi, Sv2a, Gsk3b, Sncb, Chrna1, Prepl, Neurl1a, Slc8a3, Rapgef2, Gabrg2, Igsf9b, Unc13c, Stau2, Mpp2, Cplx2
GO:0098916	0.0206529		0.987327	33	488	anterograde trans-synaptic signaling	BP	Pcdh17, Pcdh8, Cntn2, Hap1, Kcnc4, Prokr2, Plat, Lama2, Pcdhb1, Lgi1, Cnr1, Cacnb4, Nr2e1, Gabra3, Clcn3, Cacnb3, Syt13, Cadps, Dbi, Sv2a, Gsk3b, Sncb, Chrna1, Prepl, Neurl1a, Slc8a3, Rapgef2, Gabrg2, Igsf9b, Unc13c, Stau2, Mpp2, Cplx2
GO:0010975	0.0208133		0.987328	32	456	regulation of neuron projection development	BP	Nefm, Cntn2, Fzd1, Hap1, Plxnc1, Islr2, Ust, Kndc1, Arsb, Cnr1, Tbr1, Ret, Nr2e1, Ahi1, Grn, Skil, Bcl11a, Zeb2, Dscam, Atp8a2, Gsk3b, Scn1b, Map2, Pak3, Neurl1a, Sdc2, Inpp5f, Rapgef2, Trak1, Epha3, Pcp4, Stau2
GO:0045664	0.0211709		0.986532	38	569	regulation of neuron differentiation	BP	Zhx2, Nefm, Cntn2, Fzd1, Hap1, Plxnc1, Islr2, Ust, Kndc1, Arsb, Cnr1, Tbr1, Ret, Nr2e1, Ahi1, Grn, Skil, Bcl11a, Zeb2, Dscam, Atp8a2, Gsk3b, Scn1b, Bend6, Map2, Pak3, Neurl1a, Sdc2, Inpp5f, Bcl2, Rapgef2, Trak1, Epha3, Nap1l2, Pbx1, Impact, Pcp4, Stau2
GO:0099537	0.0213256		0.986881	33	489	trans-synaptic signaling	BP	Pcdh17, Pcdh8, Cntn2, Hap1, Kcnc4, Prokr2, Plat, Lama2, Pcdhb1, Lgi1, Cnr1, Cacnb4, Nr2e1, Gabra3, Clcn3, Cacnb3, Syt13, Cadps, Dbi, Sv2a, Gsk3b, Sncb, Chrna1, Prepl, Neurl1a, Slc8a3, Rapgef2, Gabrg2, Igsf9b, Unc13c, Stau2, Mpp2, Cplx2
GO:0060491	0.0214023		0.990862	12	135	regulation of cell projection assembly	BP	Rhoq, Hap1, Myo3b, Dock11, Tgfb3, Gpm6a, Cdc42ep2, Neurl1a, Cep120, Atp7a, Cep135, Stau2
GO:0022892	0.0219094		0.985554	44	731	substrate-specific transporter activity	MF	Cacng5, Osbpl8, Nipal3, Slc43a2, Kcnc4, Slc4a8, Stim1, Tap1, Gabrq, Slc9a9, Trpm3, Mmgt1, Anxa5, Slc16a6, Cacnb4, Slco5a1, Gabra3, Clcn3, Slc17a8, Cacnb3, Fam155a, Gpm6a, Slc1a2, Pkd2l2, Kcna3, Atp8a2, Scn1b, Chrna1, Npc2, Kcnk10, Tusc3, Slc9a6, Slc8a3, Ano10, Atp6v1g2, Slc15a4, Gabrg2, Kcnj11, Slc17a6, Atp7a, Kcnj16, Slc36a1, Atp11c, Ryr1
GO:0099536	0.0219236		0.986484	33	490	synaptic signaling	BP	Pcdh17, Pcdh8, Cntn2, Hap1, Kcnc4, Prokr2, Plat, Lama2, Pcdhb1, Lgi1, Cnr1, Cacnb4, Nr2e1, Gabra3, Clcn3, Cacnb3, Syt13, Cadps, Dbi, Sv2a, Gsk3b, Sncb, Chrna1, Prepl, Neurl1a, Slc8a3, Rapgef2, Gabrg2, Igsf9b, Unc13c, Stau2, Mpp2, Cplx2
GO:0021543	0.0224988		0.990347	12	126	pallium development	BP	Kirrel3, Trappc9, Tacc1, Nr2e1, Nrp2, Zbtb18, Zeb2, Gsk3b, Neurod6, Cep120, Epha5, Emx2
GO:0031133	0.0227942		0.998829	2	5	regulation of axon diameter	BP	Nefm, Cntn2
GO:0035278	0.0232387		0.997173	3	12	miRNA mediated inhibition of translation	BP	Stat3, Ago2, Tnrc6a
GO:0040033	0.0232387		0.997173	3	12	negative regulation of translation, ncRNA-mediated	BP	Stat3, Ago2, Tnrc6a
GO:0045974	0.0232387		0.997173	3	12	regulation of translation, ncRNA-mediated	BP	Stat3, Ago2, Tnrc6a
GO:0014042	0.0236273		0.998762	2	5	positive regulation of neuron maturation	BP	Ret, Bcl2
GO:0050432	0.0239731		0.994281	5	39	catecholamine secretion	BP	Ghsr, Hrh3, Cnr1, Cadps, Pcp4
GO:0045058	0.0241506		0.995477	4	24	T cell selection	BP	Themis, Stat3, H2-DMa, Bcl2
GO:0072006	0.024302		0.990976	9	86	nephron development	BP	Kirrel3, Nup93, Ret, Ahi1, Ptpro, Bcl2, Ctnnbip1, Pbx1, Kif26b
GO:0004757	0.0244053		1	1	1	sepiapterin reductase activity	MF	Spr
GO:0019889	0.0244053		1	1	1	pteridine metabolic process	BP	Spr
GO:0004890	0.0245127		0.996829	3	15	GABA-A receptor activity	MF	Gabrq, Gabra3, Gabrg2
GO:0006582	0.0246051		0.996849	3	14	melanin metabolic process	BP	Zeb2, Bcl2, Rapgef2
GO:0015267	0.0247357		0.986269	22	306	channel activity	MF	Cacng5, Kcnc4, Stim1, Gabrq, Trpm3, Cacnb4, Gabra3, Clcn3, Cacnb3, Fam155a, Gpm6a, Pkd2l2, Kcna3, Scn1b, Chrna1, Kcnk10, Ano10, Bcl2, Gabrg2, Kcnj11, Kcnj16, Ryr1
GO:0022803	0.0247357		0.986269	22	306	passive transmembrane transporter activity	MF	Cacng5, Kcnc4, Stim1, Gabrq, Trpm3, Cacnb4, Gabra3, Clcn3, Cacnb3, Fam155a, Gpm6a, Pkd2l2, Kcna3, Scn1b, Chrna1, Kcnk10, Ano10, Bcl2, Gabrg2, Kcnj11, Kcnj16, Ryr1
GO:0042755	0.0247656		0.99527	4	27	eating behavior	BP	Ghsr, Hrh3, Stat3, Atp8a2
GO:0003857	0.0248032		0.998419	2	8	3-hydroxyacyl-CoA dehydrogenase activity	MF	Cryl1, Hadh
GO:0010770	0.0250761		0.988636	13	146	positive regulation of cell morphogenesis involved in differentiation	BP	Plxnc1, Islr2, Olfm4, Skil, Bcl11a, Zeb2, Dscam, Gsk3b, Pak3, Trak1, Mapk9, Dock5, Stau2
GO:0031730	0.0254016		0.998616	2	5	CCR5 chemokine receptor binding	MF	Stat3, Jak1
GO:0006334	0.0256615		0.991692	7	89	nucleosome assembly	BP	Nap1l5, Hist1h1a, Smyd3, Anp32e, Tspyl4, Hist2h2bb, Nap1l2
GO:0032096	0.0256947		0.998331	2	8	negative regulation of response to food	BP	Ghsr, Nucb2
GO:0032099	0.0256947		0.998331	2	8	negative regulation of appetite	BP	Ghsr, Nucb2
GO:0003714	0.0257306		0.988714	12	137	transcription corepressor activity	MF	Zhx2, Hipk1, Lmcd1, Nfib, Skil, Bcl11a, Ywhab, Bend6, Zhx1, Jazf1, Runx1t1, Bcor
340	0.0258028		0.996534	3	17	Histidine metabolism	KEGG	Aldh7a1, Aldh3a2, Aldh9a1
GO:0120036	0.0258085		0.981375	69	1163	plasma membrane bounded cell projection organization	BP	Rhoq, Nyap2, Nefm, Nrn1, Cntn2, Fzd1, Hap1, Plxnc1, Vav2, Islr2, Jun, Ust, Kirrel3, Myo3b, Nfib, Lama2, Kndc1, Arsb, Dock11, Lgi1, Tgfb3, Cnr1, Tbr1, Ret, Dynll2, Nr2e1, Flrt1, Lifr, Rapgef6, Hprt, Ahi1, Nrp2, Parva, Dnah5, Grn, Gpm6a, Dzip1, Zmynd10, Skil, Ptpro, Dst, Cdc42ep2, Bcl11a, Zeb2, Dscam, Atp8a2, Gsk3b, Scn1b, Map2, Pak3, Neurl1a, Ttll5, Slc9a6, Sdc2, Inpp5f, Cep120, Bcl2, Rapgef2, Tra…
GO:0046189	0.025841		0.995018	4	26	phenol-containing compound biosynthetic process	BP	Gch1, Zeb2, Rapgef2, Atp7a
GO:0005215	0.0260805		0.982158	50	854	transporter activity	MF	Cacng5, Osbpl8, Nipal3, Slc43a2, Kcnc4, Slc4a8, Stim1, Tap1, Gabrq, Slc9a9, Trpm3, Tmem184c, Mmgt1, Anxa5, Slc16a6, Cacnb4, Slco5a1, Gabra3, Clcn3, Slc17a8, Cacnb3, Fam155a, Slc18b1, Gpm6a, Slc1a2, Pkd2l2, Kcna3, Sv2a, Atp8a2, Scn1b, Chrna1, Npc2, Kcnk10, Tusc3, Slc9a6, Slc8a3, Ano10, Atp6v1g2, Bcl2, Slc15a4, Gabrg2, Kcnj11, Slc17a6, Lrp10, Atp7a, Kcnj16, Slc36a1, Atp11c, Chp1, Ryr1
GO:0004422	0.026295		1	1	1	hypoxanthine phosphoribosyltransferase activity	MF	Hprt
GO:0006178	0.026295		1	1	1	guanine salvage	BP	Hprt
GO:0046099	0.026295		1	1	1	guanine biosynthetic process	BP	Hprt
GO:0052657	0.026295		1	1	1	guanine phosphoribosyltransferase activity	MF	Hprt
GO:0031086	0.026414		0.998406	2	6	nuclear-transcribed mRNA catabolic process, deadenylation-independent decay	BP	Pnrc2, Pnrc1
GO:0031087	0.026414		0.998406	2	6	deadenylation-independent decapping of nuclear-transcribed mRNA	BP	Pnrc2, Pnrc1
GO:0051224	0.0265409		0.98784	13	163	negative regulation of protein transport	BP	Ghsr, Fzd1, Anxa5, Ndfip2, Ndufaf2, Hadh, Pkia, Gsk3b, Irs1, Kcnj11, Tnfrsf21, Gopc, Chp1
GO:0050995	0.0267745		0.996417	3	15	negative regulation of lipid catabolic process	BP	Cnr1, Bscl2, Dbi
GO:0021764	0.0269347		0.998485	2	5	amygdala development	BP	Tbr1, Nr2e1
GO:0050104	0.0271485		1	1	1	L-gulonate 3-dehydrogenase activity	MF	Cryl1
GO:0002483	0.0273359		0.998164	2	8	antigen processing and presentation of endogenous peptide antigen	BP	Tap1, Tapbp
GO:0021542	0.0273709		0.996347	3	14	dentate gyrus development	BP	Nr2e1, Neurod6, Emx2
GO:0021979	0.0276297		0.998292	2	6	hypothalamus cell differentiation	BP	Hap1, Nrp2
GO:0005216	0.027643		0.984715	21	286	ion channel activity	MF	Cacng5, Kcnc4, Stim1, Gabrq, Trpm3, Cacnb4, Gabra3, Clcn3, Cacnb3, Fam155a, Gpm6a, Pkd2l2, Kcna3, Scn1b, Chrna1, Kcnk10, Ano10, Gabrg2, Kcnj11, Kcnj16, Ryr1
480	0.0277544		0.994364	4	38	Glutathione metabolism	KEGG	Gpx8, Gsr, Gclc, Odc1
GO:0001578	0.0278486		0.990931	7	68	microtubule bundle formation	BP	Dnah5, Nav1, Zmynd10, Map2, Neurl1a, Ttll5, Chp1
GO:0022603	0.0280099		0.981318	43	676	regulation of anatomical structure morphogenesis	BP	Ghsr, Rhoq, Nefm, Cntn2, Fzd1, Plxnc1, Stim1, Islr2, Ust, Nfib, Kndc1, Olfm4, Tbr1, Ret, Nr2e1, Ahi1, Parva, H2-DMa, Skil, Fermt2, Cdc42ep2, Bcl11a, Zeb2, Dscam, Gsk3b, Map2, Pak3, Sdc2, Bcl2, Rapgef2, Adamts12, Poglut1, Trak1, Mapk9, Ppargc1a, Dock5, Cpe, Postn, Stau2, Bcor, Anxa3, Cdc42se1, Jak1
GO:0070091	0.0280519		0.998251	2	6	glucagon secretion	BP	Nucb2, Irs1
GO:0070092	0.0280519		0.998251	2	6	regulation of glucagon secretion	BP	Nucb2, Irs1
GO:0036114	0.0283145		1	1	1	medium-chain fatty-acyl-CoA catabolic process	BP	Acot7
GO:0036115	0.0283145		1	1	1	fatty-acyl-CoA catabolic process	BP	Acot7
GO:0036116	0.0283145		1	1	1	long-chain fatty-acyl-CoA catabolic process	BP	Acot7
GO:1900533	0.0283145		1	1	1	palmitic acid metabolic process	BP	Acot7
GO:1900535	0.0283145		1	1	1	palmitic acid biosynthetic process	BP	Acot7
790	0.0284027		0.998052	2	8	Folate biosynthesis	KEGG	Gch1, Spr
GO:0017172	0.028763		1	1	1	cysteine dioxygenase activity	MF	Cdo1
GO:0047395	0.028763		1	1	1	glycerophosphoinositol glycerophosphodiesterase activity	MF	Gde1
GO:0042430	0.0288347		0.996029	3	15	indole-containing compound metabolic process	BP	Gch1, Spr, Atp7a
GO:0001836	0.0293866		0.992509	5	48	release of cytochrome c from mitochondria	BP	Jun, Bcl2, Mllt11, Mapk9, Atp7a
GO:0048869	0.0294412		0.976674	147	2783	cellular developmental process	BP	Sostdc1, Themis, Peg10, Rhoq, Nyap2, Zhx2, Nefm, Nrn1, Osbpl8, Txnip, Cntn2, Fzd1, Sla, Hap1, Spr, Hdac11, Plxnc1, Stim1, Fbxo9, Islr2, Jun, Ust, Hipk1, Nxn, Kirrel3, Myo3b, Nfib, Tcp11, Lama2, Kndc1, Morc1, Arsb, Shb, Dock11, Trappc9, Ank1, Tacc1, Nup93, Olfm4, Stat3, Lgi1, Scel, Myt1l, Tgfb3, Nanos1, Creb5, Cnr1, Tbr1, Ret, Cacnb4, Nr2e1, Flrt1, Crb1, Meig1, Faim2, Lifr, Hprt, Ahi1, Xrcc5, Nrp2…
GO:0022838	0.0295846		0.983522	21	289	substrate-specific channel activity	MF	Cacng5, Kcnc4, Stim1, Gabrq, Trpm3, Cacnb4, Gabra3, Clcn3, Cacnb3, Fam155a, Gpm6a, Pkd2l2, Kcna3, Scn1b, Chrna1, Kcnk10, Ano10, Gabrg2, Kcnj11, Kcnj16, Ryr1
GO:0072201	0.030109		0.998049	2	6	negative regulation of mesenchymal cell proliferation	BP	Nfib, Ctnnbip1
GO:0014074	0.0304261		0.989033	8	75	response to purine-containing compound	BP	Jun, Cdo1, Slc8a3, Irs1, Pdxp, Rapgef2, Kcnj11, Ryr1
GO:1904427	0.0304934		0.992252	5	39	positive regulation of calcium ion transmembrane transport	BP	Hap1, Stim1, Trdn, Dbi, Ank2
GO:0032989	0.0305216		0.978632	54	862	cellular component morphogenesis	BP	Rhoq, Nyap2, Nefm, Nrn1, Cntn2, Spr, Plxnc1, Islr2, Ust, Kirrel3, Myo3b, Nfib, Lama2, Kndc1, Olfm4, Lgi1, Tbr1, Ret, Nr2e1, Flrt1, Lifr, Hprt, Nrp2, Parva, Gpm6a, Skil, Ptpro, Fermt2, Dst, Cdc42ep2, Bcl11a, Zeb2, Dscam, Atp8a2, Gsk3b, Scn1b, Map2, Radil, Pak3, Slc9a6, Sdc2, Bcl2, Rapgef2, Trak1, Mapk9, Dock5, Epha5, Atp7a, Impact, Postn, Stau2, Cdc42se1, Ldb3, Neb
GO:0004496	0.030539		1	1	1	mevalonate kinase activity	MF	Mvk
GO:0015672	0.0307441		0.982786	21	309	monovalent inorganic cation transport	BP	Kcnc4, Slc4a8, Glrx, Slc9a9, Ank1, Slc17a8, Wnk1, Kcna3, Scn1b, Ank2, Kcnk10, Slc9a6, Slc8a3, Atp6v1g2, Kcnj11, Slc17a6, Atp7a, Kcnj16, Slc36a1, Nsf, Chp1
GO:0000287	0.030865		0.986058	12	151	magnesium ion binding	MF	Endov, Hprt, Wnk1, Atp8a2, Dck, Nek6, Pdxp, Xxylt1, Stk38l, Gclc, Mast4, Atp11c
GO:1901019	0.0309345		0.990824	6	51	regulation of calcium ion transmembrane transporter activity	BP	Hap1, Stim1, Trdn, Cacnb4, Cacnb3, Ank2
GO:0007417	0.0310018		0.979493	40	595	central nervous system development	BP	Cntn2, Hap1, Hdac11, Kirrel3, Nfib, Kndc1, Cenpf, Arsb, Trappc9, Tacc1, Stat3, Nanos1, Tbr1, Nr2e1, Faim2, Hprt, Ahi1, Nrp2, Dnah5, Zbtb18, Slc1a2, Dbi, Zeb2, Gsk3b, Uchl5, Scn1b, Map2, Neurod6, Dpcd, Slc8a3, Chd5, Cep120, Bcl2, Aldh3a2, Rapgef2, Nr2c2, Epha5, Atp7a, Emx2, Tnfrsf21
GO:0002118	0.031135		0.997946	2	6	aggressive behavior	BP	Kirrel3, Nr2e1
GO:0015291	0.0311667		0.985935	12	139	secondary active transmembrane transporter activity	MF	Slc4a8, Slc9a9, Slc16a6, Slco5a1, Clcn3, Slc17a8, Slc1a2, Slc9a6, Slc8a3, Slc15a4, Slc17a6, Slc36a1
GO:0097210	0.0313464		1	1	1	response to gonadotropin-releasing hormone	BP	Anxa5
GO:0097211	0.0313464		1	1	1	cellular response to gonadotropin-releasing hormone	BP	Anxa5
GO:1902721	0.0313464		1	1	1	negative regulation of prolactin secretion	BP	Anxa5
GO:0008442	0.0314457		1	1	1	3-hydroxyisobutyrate dehydrogenase activity	MF	Hibadh
GO:0045636	0.0315322		0.998067	2	5	positive regulation of melanocyte differentiation	BP	Zeb2, Bcl2
GO:0046676	0.0316427		0.991867	5	40	negative regulation of insulin secretion	BP	Ghsr, Ndufaf2, Hadh, Irs1, Kcnj11
GO:0031998	0.031653		0.99548	3	15	regulation of fatty acid beta-oxidation	BP	Cnr1, Dbi, Irs1
GO:0099504	0.0316535		0.98691	10	109	synaptic vesicle cycle	BP	Pcdh17, Clcn3, Grn, Syt13, Cadps, Dnajc6, Prepl, Slc17a6, Unc13c, Cplx2
GO:2000172	0.0316755		0.99789	2	6	regulation of branching morphogenesis of a nerve	BP	Bcl11a, Cpe
GO:0060284	0.0317753		0.978244	47	754	regulation of cell development	BP	Zhx2, Nefm, Cntn2, Fzd1, Hap1, Plxnc1, Islr2, Ust, Tcp11, Kndc1, Arsb, Shb, Olfm4, Stat3, Cnr1, Tbr1, Ret, Nr2e1, Ahi1, Xrcc5, Grn, Skil, Bcl11a, Zeb2, Dscam, Atp8a2, Gsk3b, Scn1b, Bend6, Map2, Pak3, Neurl1a, Sdc2, Inpp5f, Bcl2, Rapgef2, Trak1, Mapk9, Epha3, Dock5, Nap1l2, Pbx1, Impact, Pcp4, Postn, Tnfrsf21, Stau2
GO:0030902	0.0318612		0.986184	11	117	hindbrain development	BP	Hap1, Nfib, Kndc1, Nanos1, Tbr1, Faim2, Ahi1, Zbtb18, Bcl2, Nr2c2, Atp7a
GO:0060322	0.0319046		0.979598	34	489	head development	BP	Cntn2, Hap1, Kirrel3, Nfib, Kndc1, Cenpf, Trappc9, Tacc1, Tgfb3, Nanos1, Tbr1, Nr2e1, Faim2, Hprt, Ahi1, Nrp2, Dnah5, Zbtb18, Slc1a2, Dbi, Zeb2, Gsk3b, Uchl5, Neurod6, Dpcd, Chd5, Cep120, Bcl2, Rapgef2, Atp6ap2, Nr2c2, Epha5, Atp7a, Emx2
GO:1904950	0.0319298		0.984979	13	167	negative regulation of establishment of protein localization	BP	Ghsr, Fzd1, Anxa5, Ndfip2, Ndufaf2, Hadh, Pkia, Gsk3b, Irs1, Kcnj11, Tnfrsf21, Gopc, Chp1
GO:0030001	0.0321423		0.979273	35	551	metal ion transport	BP	Cacng5, Hap1, Nipal3, Kcnc4, Slc4a8, Stim1, Glrx, Slc9a9, Wfs1, Trdn, Mmgt1, Cacnb4, Ndfip2, Slc17a8, Cacnb3, Fam155a, Mcur1, Dbi, Wnk1, Kcna3, Scn1b, Ank2, Kcnk10, Tusc3, Slc9a6, Slc8a3, Micu2, Bcl2, Kcnj11, Slc17a6, Atp7a, Kcnj16, Nsf, Chp1, Ryr1
GO:0051561	0.0322036		0.997636	2	8	positive regulation of mitochondrial calcium ion concentration	BP	Mcur1, Micu2
GO:0035252	0.032357		0.997704	2	7	UDP-xylosyltransferase activity	MF	Poglut1, Xxylt1
GO:0042285	0.032357		0.997704	2	7	xylosyltransferase activity	MF	Poglut1, Xxylt1
GO:0006780	0.0324066		1	1	1	uroporphyrinogen III biosynthetic process	BP	Uros
5323	0.0324999		0.993106	4	35	Rheumatoid arthritis	KEGG	Jun, Tgfb3, H2-DMa, Atp6v1g2
GO:1904799	0.0325138		1	1	1	regulation of neuron remodeling	BP	Bcl11a
GO:1904800	0.0325138		1	1	1	negative regulation of neuron remodeling	BP	Bcl11a
GO:0048731	0.0328895		0.973672	159	3010	system development	BP	Sostdc1, Themis, Ghsr, Peg10, Rspo3, Nyap2, Zhx2, Nefm, Nrn1, Pcdh17, Pcdh8, Txnip, Cntn2, Fzd1, Hap1, Spr, Hdac11, Plxnc1, Arrdc3, Vav2, Coprs, Stim1, Islr2, Jun, Ust, Hipk1, Tead1, Nxn, Kirrel3, Myo3b, Nfib, Lama2, Pcdhb1, Kndc1, Wfs1, Cenpf, Arsb, Shb, Dock11, Trappc9, Cntfr, Ank1, Tacc1, Nup93, Stat3, Lgi1, Scel, Myt1l, Tgfb3, Nanos1, Creb5, Cnr1, Tbr1, Ret, Cacnb4, Nr2e1, Flrt1, Crb1, Faim2,…
GO:0006631	0.0329649		0.983453	15	216	fatty acid metabolic process	BP	Ghsr, Cryl1, Cnr1, Hadh, Nucb2, Elovl2, Acot7, Dbi, Elovl4, Abhd5, Irs1, Mapk9, Ppargc1a, Acsl3, Elovl6
GO:1902490	0.0330488		1	1	1	regulation of sperm capacitation	BP	Tcp11
GO:0002363	0.0332714		0.997724	2	6	alpha-beta T cell lineage commitment	BP	Stat3, Bcl2
GO:0048513	0.0333113		0.97412	112	2047	animal organ development	BP	Sostdc1, Themis, Ghsr, Peg10, Rspo3, Txnip, Cntn2, Fzd1, Hap1, Arrdc3, Coprs, Stim1, Jun, Hipk1, Tead1, Kirrel3, Myo3b, Nfib, Kndc1, Wfs1, Cenpf, Shb, Dock11, Trappc9, Cntfr, Ank1, Tacc1, Nup93, Stat3, Scel, Tgfb3, Nanos1, Creb5, Tbr1, Ret, Cacnb4, Nr2e1, Crb1, Faim2, Lifr, Hprt, Ahi1, Cdo1, Xrcc5, Nrp2, Parva, Dnah5, Zbtb18, Lgals8, Rbfox1, Zfp608, Gpm6a, H2-DMa, Skil, Cbfb, Ptpro, Ermp1, Slc1a2…
GO:0050897	0.0335105		0.997576	2	7	cobalt ion binding	MF	Myt1l, Cpe
GO:0002478	0.0335124		0.997364	2	10	antigen processing and presentation of exogenous peptide antigen	BP	Tapbp, H2-DMa
GO:0010720	0.0335281		0.978922	31	464	positive regulation of cell development	BP	Fzd1, Hap1, Plxnc1, Islr2, Arsb, Olfm4, Cnr1, Ret, Ahi1, Xrcc5, Grn, Skil, Bcl11a, Zeb2, Dscam, Atp8a2, Gsk3b, Scn1b, Bend6, Pak3, Neurl1a, Bcl2, Rapgef2, Trak1, Mapk9, Epha3, Dock5, Nap1l2, Impact, Pcp4, Stau2
GO:0010842	0.0336124		0.99514	3	14	retina layer formation	BP	Hipk1, Ahi1, Atp8a2
GO:0050795	0.0336956		0.98977	6	54	regulation of behavior	BP	Ghsr, Arrdc3, Stat3, Cnr1, Ahi1, Nr2c2
GO:0048857	0.0336967		0.995123	3	14	neural nucleus development	BP	Kirrel3, Nfib, Bcl2
GO:0018200	0.0343859		0.9948	3	18	peptidyl-glutamic acid modification	BP	Agbl4, Ttll5, Naa11
GO:0032361	0.0344876		1	1	1	pyridoxal phosphate catabolic process	BP	Pdxp
GO:0042365	0.0344876		1	1	1	water-soluble vitamin catabolic process	BP	Pdxp
GO:0042820	0.0344876		1	1	1	vitamin B6 catabolic process	BP	Pdxp
GO:0060395	0.0347009		0.990829	5	42	SMAD protein signal transduction	BP	Jun, Nup93, Tgfb3, Meg3, Mstn
GO:0032414	0.034728		0.988199	7	63	positive regulation of ion transmembrane transporter activity	BP	Hap1, Stim1, Glrx, Trdn, Ank2, Kcnj11, Chp1
GO:0008277	0.0350589		0.986938	8	86	regulation of G-protein coupled receptor protein signaling pathway	BP	Rgs13, Cntn2, Ly6g6e, Arrdc3, Rgs5, Ubqln2, Ywhab, Gprasp1
GO:0032835	0.0352187		0.990756	5	36	glomerulus development	BP	Kirrel3, Nup93, Ret, Ptpro, Bcl2
GO:0072001	0.0352714		0.981766	16	198	renal system development	BP	Kirrel3, Wfs1, Cenpf, Nup93, Ret, Ahi1, Ptpro, Nfia, Cys1, Bcl2, Ctnnbip1, Cat, Pbx1, Emx2, Kif26b, Odc1
GO:0034505	0.0357268		0.997458	2	6	tooth mineralization	BP	Stim1, Bcor
GO:0016620	0.0358014		0.992241	4	31	oxidoreductase activity, acting on the aldehyde or oxo group of donors, NAD or NADP as acceptor	MF	Aldh7a1, Aldh3a2, Aldh9a1, Aldh4a1
5014	0.035934		0.990386	5	44	Amyotrophic lateral sclerosis (ALS)	KEGG	Nefm, Slc1a2, Bcl2, Cat, Chp1
GO:0031547	0.0360548		0.997422	2	6	brain-derived neurotrophic factor receptor signaling pathway	BP	Slc9a6, Rapgef2
GO:0042440	0.0361345		0.990259	5	49	pigment metabolic process	BP	Hprt, Zeb2, Bcl2, Rapgef2, Uros
GO:0030030	0.0365437		0.973109	69	1187	cell projection organization	BP	Rhoq, Nyap2, Nefm, Nrn1, Cntn2, Fzd1, Hap1, Plxnc1, Vav2, Islr2, Jun, Ust, Kirrel3, Myo3b, Nfib, Lama2, Kndc1, Arsb, Dock11, Lgi1, Tgfb3, Cnr1, Tbr1, Ret, Dynll2, Nr2e1, Flrt1, Lifr, Rapgef6, Hprt, Ahi1, Nrp2, Parva, Dnah5, Grn, Gpm6a, Dzip1, Zmynd10, Skil, Ptpro, Dst, Cdc42ep2, Bcl11a, Zeb2, Dscam, Atp8a2, Gsk3b, Scn1b, Map2, Pak3, Neurl1a, Ttll5, Slc9a6, Sdc2, Inpp5f, Cep120, Bcl2, Rapgef2, Tra…
GO:0015171	0.0365881		0.988698	6	52	amino acid transmembrane transporter activity	MF	Slc43a2, Slc17a8, Slc1a2, Slc15a4, Slc17a6, Slc36a1
GO:0021846	0.0365927		0.992165	4	25	cell proliferation in forebrain	BP	Tacc1, Zeb2, Cep120, Emx2
GO:0006874	0.0367952		0.979669	19	264	cellular calcium ion homeostasis	BP	Hap1, Stim1, Hrh3, Wfs1, Trdn, Cacnb4, Cacnb3, Fam155a, Nucb2, Mcur1, Dbi, Sv2a, Adcy5, Ank2, Tmem178, Slc8a3, Micu2, Bcl2, Ryr1
GO:0032105	0.0368253		0.997013	2	9	negative regulation of response to extracellular stimulus	BP	Ghsr, Nucb2
GO:0032108	0.0368253		0.997013	2	9	negative regulation of response to nutrient levels	BP	Ghsr, Nucb2
GO:0014909	0.0372833		0.987118	7	65	smooth muscle cell migration	BP	Plat, Parva, Bcl2, Ppargc1a, Dock5, Atp7a, Postn
GO:0007267	0.0373288		0.973133	59	1003	cell-cell signaling	BP	Sostdc1, Ghsr, Rspo3, Pcdh17, Pcdh8, Cntn2, Fzd1, Hap1, Kcnc4, Glrx, Prokr2, Plat, Nxn, Lama2, Pcdhb1, Lgi1, Scel, Cnr1, Anxa5, Cacnb4, Nr2e1, Ndufaf2, Gabra3, Clcn3, Cacnb3, Hadh, Syt13, Nucb2, Ptpro, Cadps, Fermt2, Dbi, Zeb2, Sv2a, Gsk3b, Sncb, Pcdhgc5, Scn1b, Adcy5, Chrna1, Ank2, Prepl, Neurl1a, Pcdhac2, Slc8a3, Irs1, Rapgef2, Ctnnbip1, Atp6ap2, Gabrg2, Kcnj11, Igsf9b, Pcdhgc3, Epha5, Cpe, Unc…
GO:0008235	0.0373406		0.991843	4	29	metalloexopeptidase activity	MF	Cpxm2, Agbl4, Metap2, Cpe
GO:0045454	0.0375479		0.989752	5	51	cell redox homeostasis	BP	Glrx, Nxn, Gsr, Tmx4, Gclc
GO:0006043	0.0375872		1	1	1	glucosamine catabolic process	BP	Gnpda1
GO:0048537	0.03765		0.997097	2	7	mucosal-associated lymphoid tissue development	BP	Ret, Cacnb4
GO:0048541	0.03765		0.997097	2	7	Peyer's patch development	BP	Ret, Cacnb4
GO:0005261	0.0377623		0.979866	17	219	cation channel activity	MF	Cacng5, Kcnc4, Stim1, Trpm3, Cacnb4, Cacnb3, Fam155a, Gpm6a, Pkd2l2, Kcna3, Scn1b, Chrna1, Kcnk10, Ano10, Kcnj11, Kcnj16, Ryr1
GO:0015085	0.0381213		0.98378	10	101	calcium ion transmembrane transporter activity	MF	Cacng5, Stim1, Anxa5, Cacnb4, Cacnb3, Fam155a, Gpm6a, Pkd2l2, Slc8a3, Ryr1
GO:1903431	0.0381218		0.99704	2	7	positive regulation of cell maturation	BP	Ret, Bcl2
GO:0002003	0.0382222		1	1	1	angiotensin maturation	BP	Atp6ap2
GO:0005004	0.0386264		0.997131	2	6	GPI-linked ephrin receptor activity	MF	Epha3, Epha5
GO:0001077	0.0386529		0.980761	14	177	transcriptional activator activity, RNA polymerase II core promoter proximal region sequence-specific binding	MF	Jun, Tead1, Nfib, Stat3, Creb5, Nr2e1, Camta1, Nfia, Cys1, Nkrf, Meis2, Neurod6, Nr2c2, Pbx1
GO:0001155	0.0387034		1	1	1	TFIIIA-class transcription factor binding	MF	Optn
GO:0051560	0.0390108		0.993761	3	19	mitochondrial calcium ion homeostasis	BP	Mcur1, Slc8a3, Micu2
GO:0043949	0.0390662		0.993788	3	18	regulation of cAMP-mediated signaling	BP	Tcp11, Pde10a, Rapgef2
GO:0042551	0.0390956		0.989423	5	37	neuron maturation	BP	Cntn2, Ret, Bcl11a, Gsk3b, Bcl2
GO:0007420	0.039121		0.974907	32	460	brain development	BP	Cntn2, Hap1, Kirrel3, Nfib, Kndc1, Cenpf, Trappc9, Tacc1, Nanos1, Tbr1, Nr2e1, Faim2, Hprt, Ahi1, Nrp2, Dnah5, Zbtb18, Slc1a2, Dbi, Zeb2, Gsk3b, Uchl5, Neurod6, Dpcd, Chd5, Cep120, Bcl2, Rapgef2, Nr2c2, Epha5, Atp7a, Emx2
GO:0048002	0.0395782		0.993511	3	23	antigen processing and presentation of peptide antigen	BP	Tap1, Tapbp, H2-DMa
GO:0008088	0.0397083		0.98748	6	53	axo-dendritic transport	BP	Nefm, Hap1, Ap3m2, Dst, Trak1, Stau2
GO:1904977	0.0397851		1	1	1	lymphatic endothelial cell migration	BP	Lgals8
GO:0004586	0.0398444		1	1	1	ornithine decarboxylase activity	MF	Odc1
GO:0021960	0.039866		0.996987	2	6	anterior commissure morphogenesis	BP	Nfib, Nr2e1
1040	0.0398912		0.993564	3	19	Biosynthesis of unsaturated fatty acids	KEGG	Elovl2, Acot7, Elovl6
GO:0004788	0.0399456		1	1	1	thiamine diphosphokinase activity	MF	Tpk1
GO:0009229	0.0399456		1	1	1	thiamine diphosphate biosynthetic process	BP	Tpk1
GO:0030975	0.0399456		1	1	1	thiamine binding	MF	Tpk1
GO:0046683	0.0400679		0.98592	7	67	response to organophosphorus	BP	Jun, Cdo1, Slc8a3, Pdxp, Rapgef2, Kcnj11, Ryr1
GO:0072073	0.0400682		0.983672	9	95	kidney epithelium development	BP	Nup93, Ret, Ahi1, Ptpro, Bcl2, Ctnnbip1, Cat, Pbx1, Kif26b
410	0.0401714		0.993501	3	19	beta-Alanine metabolism	KEGG	Aldh7a1, Aldh3a2, Aldh9a1
GO:0070008	0.0401877		0.996788	2	7	serine-type exopeptidase activity	MF	Prepl, Cpe
GO:0002528	0.0403574		1	1	1	regulation of vascular permeability involved in acute inflammatory response	BP	Ctnnbip1
GO:0001973	0.0404872		0.996751	2	7	adenosine receptor signaling pathway	BP	Cntn2, Adcy5
GO:0035588	0.0404872		0.996751	2	7	G-protein coupled purinergic receptor signaling pathway	BP	Cntn2, Adcy5
GO:0043455	0.0406414		0.996612	2	8	regulation of secondary metabolic process	BP	Zeb2, Rapgef2
GO:0004362	0.0408807		1	1	1	glutathione-disulfide reductase activity	MF	Gsr
GO:0015817	0.0411113		1	1	1	histidine transport	BP	Slc15a4
GO:0051287	0.0413262		0.988404	5	53	NAD binding	MF	Cryl1, Hadh, Hibadh, Cyb5r3, Aldh9a1
GO:0008238	0.0414198		0.986714	6	61	exopeptidase activity	MF	Cpxm2, Agbl4, Metap2, Scrn1, Prepl, Cpe
GO:0042996	0.0414326		0.996509	2	8	regulation of Golgi to plasma membrane protein transport	BP	Acsl3, Gopc
GO:0002479	0.0414441		1	1	1	antigen processing and presentation of exogenous peptide antigen via MHC class I, TAP-dependent	BP	Tapbp
GO:0050822	0.0414441		1	1	1	peptide stabilization	BP	Tapbp
GO:0050823	0.0414441		1	1	1	peptide antigen stabilization	BP	Tapbp
GO:0004506	0.0414635		1	1	1	squalene monooxygenase activity	MF	Sqle
GO:0005451	0.0415215		0.996621	2	7	monovalent cation:proton antiporter activity	MF	Slc9a9, Slc9a6
GO:0015385	0.0415215		0.996621	2	7	sodium:proton antiporter activity	MF	Slc9a9, Slc9a6
GO:0015386	0.0415215		0.996621	2	7	potassium:proton antiporter activity	MF	Slc9a9, Slc9a6
GO:0003933	0.0415486		1	1	1	GTP cyclohydrolase activity	MF	Gch1
GO:0003934	0.0415486		1	1	1	GTP cyclohydrolase I activity	MF	Gch1
GO:0051066	0.0415486		1	1	1	dihydrobiopterin metabolic process	BP	Gch1
GO:1905627	0.0415486		1	1	1	regulation of serotonin biosynthetic process	BP	Gch1
GO:0031650	0.0418196		0.996583	2	7	regulation of heat generation	BP	Arrdc3, Cnr1
GO:0071228	0.0418357		1	1	1	cellular response to tumor cell	BP	Txnip
GO:0050772	0.0420973		0.983791	8	80	positive regulation of axonogenesis	BP	Plxnc1, Islr2, Skil, Bcl11a, Zeb2, Dscam, Gsk3b, Trak1
GO:0019145	0.0421109		1	1	1	aminobutyraldehyde dehydrogenase activity	MF	Aldh9a1
GO:0047105	0.0421109		1	1	1	4-trimethylammoniobutyraldehyde dehydrogenase activity	MF	Aldh9a1
GO:0019566	0.042474		1	1	1	arabinose metabolic process	BP	Otogl
GO:0046316	0.042474		1	1	1	gluconokinase activity	MF	Idnk
GO:0046373	0.042474		1	1	1	L-arabinose metabolic process	BP	Otogl
GO:0046556	0.042474		1	1	1	alpha-L-arabinofuranosidase activity	MF	Otogl
GO:0070551	0.042474		1	1	1	endoribonuclease activity, cleaving siRNA-paired mRNA	MF	Ago2
GO:0071424	0.042474		1	1	1	rRNA (cytosine-N4-)-methyltransferase activity	MF	Mettl15
GO:0090624	0.042474		1	1	1	endoribonuclease activity, cleaving miRNA-paired mRNA	MF	Ago2
GO:0090625	0.042474		1	1	1	mRNA cleavage involved in gene silencing by siRNA	BP	Ago2
GO:0006820	0.0424766		0.975041	22	327	anion transport	BP	Osbpl8, Slc43a2, Slc4a8, Hrh3, Gabrq, Slc16a6, Cacnb4, Slco5a1, Gabra3, Clcn3, Slc17a8, Slc1a2, Sv2a, Atp8a2, Ano10, Slc15a4, Gabrg2, Mapk9, Acsl3, Slc36a1, Gopc, Atp11c
GO:0015433	0.0426674		1	1	1	peptide antigen-transporting ATPase activity	MF	Tap1
GO:0046967	0.0426674		1	1	1	cytosol to ER transport	BP	Tap1
GO:0046980	0.0426674		1	1	1	tapasin binding	MF	Tap1
GO:0019883	0.0429484		0.996131	2	10	antigen processing and presentation of endogenous antigen	BP	Tap1, Tapbp
GO:0003009	0.0431128		0.992979	3	16	skeletal muscle contraction	BP	Atp8a2, Chrna1, Slc8a3
GO:0050769	0.0431159		0.972958	28	417	positive regulation of neurogenesis	BP	Fzd1, Hap1, Plxnc1, Islr2, Arsb, Cnr1, Ret, Ahi1, Xrcc5, Grn, Skil, Bcl11a, Zeb2, Dscam, Atp8a2, Gsk3b, Scn1b, Bend6, Pak3, Neurl1a, Bcl2, Rapgef2, Trak1, Epha3, Nap1l2, Impact, Pcp4, Stau2
GO:0016917	0.0431771		0.992857	3	18	GABA receptor activity	MF	Gabrq, Gabra3, Gabrg2
GO:0008817	0.0432145		1	1	1	cob(I)yrinic acid a,c-diamide adenosyltransferase activity	MF	Mmab
GO:0030224	0.0432339		0.992843	3	18	monocyte differentiation	BP	Jun, Ctnnbip1, Sp3
GO:1903131	0.0432339		0.992843	3	18	mononuclear cell differentiation	BP	Jun, Ctnnbip1, Sp3
GO:0008802	0.0434316		1	1	1	betaine-aldehyde dehydrogenase activity	MF	Aldh7a1
GO:0045759	0.0434498		0.996374	2	7	negative regulation of action potential	BP	Kcnc4, Cnr1
GO:0032546	0.0436873		1	1	1	deoxyribonucleoside binding	MF	Dck
GO:0032548	0.0436873		1	1	1	pyrimidine deoxyribonucleoside binding	MF	Dck
GO:0034728	0.0439243		0.982748	8	112	nucleosome organization	BP	Nap1l5, Hist1h1a, Smyd3, Anp32e, Chd5, Tspyl4, Hist2h2bb, Nap1l2
GO:1902893	0.0439881		0.989906	4	28	regulation of pri-miRNA transcription from RNA polymerase II promoter	BP	Jun, Tead1, Nfib, Stat3
GO:0006714	0.044208		1	1	1	sesquiterpenoid metabolic process	BP	Aldh3a2
GO:0016899	0.044208		1	1	1	oxidoreductase activity, acting on the CH-OH group of donors, oxygen as acceptor	MF	Aldh3a2
GO:0046577	0.044208		1	1	1	long-chain-alcohol oxidase activity	MF	Aldh3a2
GO:0050061	0.044208		1	1	1	long-chain-aldehyde dehydrogenase activity	MF	Aldh3a2
GO:0052814	0.044208		1	1	1	medium-chain-aldehyde dehydrogenase activity	MF	Aldh3a2
GO:0072009	0.0442781		0.984091	7	68	nephron epithelium development	BP	Nup93, Ahi1, Ptpro, Bcl2, Ctnnbip1, Pbx1, Kif26b
GO:0030003	0.0443254		0.972895	25	388	cellular cation homeostasis	BP	Hap1, Slc4a8, Stim1, Hrh3, Slc9a9, Wfs1, Trdn, Cacnb4, Clcn3, Cacnb3, Fam155a, Nucb2, Mcur1, Dbi, Sv2a, Adcy5, Ank2, Slc9a6, Tmem178, Slc8a3, Micu2, Bcl2, Atp7a, Chp1, Ryr1
GO:0014051	0.0443678		0.992691	3	16	gamma-aminobutyric acid secretion	BP	Hrh3, Cacnb4, Sv2a
GO:0042759	0.0443967		0.996251	2	7	long-chain fatty acid biosynthetic process	BP	Acot7, Elovl6
GO:0035026	0.0445185		1	1	1	leading edge cell differentiation	BP	Jun
GO:0006168	0.0446187		0.999492	1	2	adenine salvage	BP	Hprt
GO:0046083	0.0446187		0.999492	1	2	adenine metabolic process	BP	Hprt
GO:0046084	0.0446187		0.999492	1	2	adenine biosynthetic process	BP	Hprt
GO:0019227	0.0448145		0.996196	2	7	neuronal action potential propagation	BP	Cacnb4, Scn1b
GO:0098870	0.0448145		0.996196	2	7	action potential propagation	BP	Cacnb4, Scn1b
GO:0036444	0.0449626		0.996036	2	8	mitochondrial calcium uptake	BP	Mcur1, Micu2
GO:0055074	0.045164		0.974438	19	270	calcium ion homeostasis	BP	Hap1, Stim1, Hrh3, Wfs1, Trdn, Cacnb4, Cacnb3, Fam155a, Nucb2, Mcur1, Dbi, Sv2a, Adcy5, Ank2, Tmem178, Slc8a3, Micu2, Bcl2, Ryr1
GO:0007184	0.0452335		0.992376	3	18	SMAD protein import into nucleus	BP	Jun, Nup93, Tgfb3
GO:1904064	0.0452974		0.982261	8	85	positive regulation of cation transmembrane transport	BP	Hap1, Stim1, Glrx, Trdn, Dbi, Ank2, Kcnj11, Chp1
GO:0051932	0.0455861		0.98703	5	42	synaptic transmission, GABAergic	BP	Hap1, Cnr1, Clcn3, Dbi, Gabrg2
GO:0003842	0.0456664		1	1	1	1-pyrroline-5-carboxylate dehydrogenase activity	MF	Aldh4a1
GO:0002792	0.0457889		0.981985	8	91	negative regulation of peptide secretion	BP	Ghsr, Anxa5, Ndufaf2, Hadh, Nucb2, Irs1, Kcnj11, Tnfrsf21
GO:0070483	0.0458011		1	1	1	detection of hypoxia	BP	Tgfb3
GO:0006766	0.0459646		0.989121	4	35	vitamin metabolic process	BP	Tpk1, Mmab, Pdxp, Gclc
GO:0048592	0.0459698		0.979743	10	110	eye morphogenesis	BP	Hipk1, Stat3, Crb1, Ahi1, Col8a1, Dscam, Atp8a2, Bcl2, Sp3, Stau2
GO:0046322	0.0460873		0.995771	2	9	negative regulation of fatty acid oxidation	BP	Cnr1, Dbi
GO:0001681	0.0461155		1	1	1	sialate O-acetylesterase activity	MF	Siae
GO:0008126	0.0461155		1	1	1	acetylesterase activity	MF	Siae
GO:0034338	0.0461155		1	1	1	short-chain carboxylesterase activity	MF	Siae
GO:0072755	0.0461155		1	1	1	cellular response to benomyl	BP	Impact
GO:1901561	0.0461155		1	1	1	response to benomyl	BP	Impact
GO:0015037	0.0462381		0.995591	2	11	peptide disulfide oxidoreductase activity	MF	Glrx, Gsr
GO:1902231	0.046607		0.995809	2	8	positive regulation of intrinsic apoptotic signaling pathway in response to DNA damage	BP	Nacc2, Skil
GO:0098659	0.0467439		0.988971	4	31	inorganic cation import across plasma membrane	BP	Slc9a9, Fam155a, Slc9a6, Slc8a3
GO:0099587	0.0467439		0.988971	4	31	inorganic ion import across plasma membrane	BP	Slc9a9, Fam155a, Slc9a6, Slc8a3
GO:1903891	0.0468731		1	1	1	regulation of ATF6-mediated unfolded protein response	BP	Wfs1
GO:1903892	0.0468731		1	1	1	negative regulation of ATF6-mediated unfolded protein response	BP	Wfs1
GO:0019199	0.0470761		0.98457	6	51	transmembrane receptor protein kinase activity	MF	Sostdc1, Ly6g6e, Ret, Nrp2, Epha3, Epha5
GO:2000663	0.0472156		1	1	1	negative regulation of interleukin-5 secretion	BP	Tnfrsf21
GO:2001180	0.0472156		1	1	1	negative regulation of interleukin-10 secretion	BP	Tnfrsf21
GO:0072189	0.0473544		0.995855	2	7	ureter development	BP	Ret, Nfia
GO:0045661	0.0473786		0.988773	4	31	regulation of myoblast differentiation	BP	Sostdc1, Flot2, Nr2c2, Mstn
GO:0009737	0.047407		1	1	1	response to abscisic acid	BP	Lancl2
GO:0009738	0.047407		1	1	1	abscisic acid-activated signaling pathway	BP	Lancl2
GO:0009787	0.047407		1	1	1	regulation of abscisic acid-activated signaling pathway	BP	Lancl2
GO:0009789	0.047407		1	1	1	positive regulation of abscisic acid-activated signaling pathway	BP	Lancl2
GO:0071215	0.047407		1	1	1	cellular response to abscisic acid stimulus	BP	Lancl2
GO:1901419	0.047407		1	1	1	regulation of response to alcohol	BP	Lancl2
GO:1901421	0.047407		1	1	1	positive regulation of response to alcohol	BP	Lancl2
GO:1905957	0.047407		1	1	1	regulation of cellular response to alcohol	BP	Lancl2
GO:1905959	0.047407		1	1	1	positive regulation of cellular response to alcohol	BP	Lancl2
GO:0032411	0.0475007		0.982658	7	69	positive regulation of transporter activity	BP	Hap1, Stim1, Glrx, Trdn, Ank2, Kcnj11, Chp1
GO:0002121	0.0476742		1	1	1	inter-male aggressive behavior	BP	Kirrel3
GO:0014808	0.0481684		0.991875	3	15	release of sequestered calcium ion into cytosol by sarcoplasmic reticulum	BP	Trdn, Ank2, Ryr1
GO:1903514	0.0481684		0.991875	3	15	release of sequestered calcium ion into cytosol by endoplasmic reticulum	BP	Trdn, Ank2, Ryr1
GO:2001247	0.048274		1	1	1	positive regulation of phosphatidylcholine biosynthetic process	BP	Acsl3
GO:0070093	0.0483181		0.999403	1	2	negative regulation of glucagon secretion	BP	Nucb2
GO:0045183	0.0488059		1	1	1	translation factor activity, non-nucleic acid binding	MF	Neurl1a
GO:1901142	0.0488518		0.995491	2	8	insulin metabolic process	BP	Nucb2, Cpe
GO:0003943	0.049187		1	1	1	N-acetylgalactosamine-4-sulfatase activity	MF	Arsb
GO:0061580	0.049187		1	1	1	colon epithelial cell migration	BP	Arsb
GO:0019725	0.0492809		0.967267	34	571	cellular homeostasis	BP	Hap1, Slc4a8, Stim1, Hrh3, Glrx, Nxn, Slc9a9, Wfs1, Trdn, Cacnb4, Gsr, Ndufaf2, Clcn3, Cacnb3, Fam155a, Nucb2, Mcur1, Dbi, Sv2a, Adcy5, Chrna1, Ank2, Slc9a6, Tmem178, Slc8a3, Micu2, Bcl2, Tmx4, Gclc, Epha5, Atp7a, Mstn, Chp1, Ryr1
GO:0009072	0.0494234		0.995189	2	10	aromatic amino acid family metabolic process	BP	Spr, Atp7a
5150	0.049528		0.995173	2	10	Staphylococcus aureus infection	KEGG	Masp1, H2-DMa
GO:0031651	0.0497009		1	1	1	negative regulation of heat generation	BP	Arrdc3
GO:0032427	0.0498534		1	1	1	GBD domain binding	MF	Rhoq
GO:2000016	0.0498689		0.999363	1	2	negative regulation of determination of dorsal identity	BP	Sostdc1
GO:0004180	0.0500821		0.991104	3	20	carboxypeptidase activity	MF	Cpxm2, Agbl4, Cpe
GO:0042999	0.0501913		1	1	1	regulation of Golgi to plasma membrane CFTR protein transport	BP	Gopc
GO:0043000	0.0501913		1	1	1	Golgi to plasma membrane CFTR protein transport	BP	Gopc
GO:0043002	0.0501913		1	1	1	negative regulation of Golgi to plasma membrane CFTR protein transport	BP	Gopc
GO:0043004	0.0501913		1	1	1	cytoplasmic sequestering of CFTR protein	BP	Gopc
GO:0010889	0.050238		0.995164	2	9	regulation of sequestering of triglyceride	BP	Osbpl8, Abhd5
GO:0030730	0.050238		0.995164	2	9	sequestering of triglyceride	BP	Osbpl8, Abhd5
GO:0060402	0.0503539		0.978567	9	99	calcium ion transport into cytosol	BP	Hap1, Trdn, Cacnb3, Fam155a, Dbi, Ank2, Slc8a3, Bcl2, Ryr1
GO:0070884	0.0503856		0.991195	3	17	regulation of calcineurin-NFAT signaling cascade	BP	Lmcd1, Rcan1, Chp1
GO:0106056	0.0503856		0.991195	3	17	regulation of calcineurin-mediated signaling	BP	Lmcd1, Rcan1, Chp1
GO:0046628	0.0504511		0.995425	2	7	positive regulation of insulin receptor signaling pathway	BP	Osbpl8, Irs1
GO:0060391	0.0505462		0.995245	2	8	positive regulation of SMAD protein import into nucleus	BP	Nup93, Tgfb3
GO:0021872	0.0505511		0.983057	6	56	forebrain generation of neurons	BP	Cntn2, Tbr1, Nr2e1, Nrp2, Rapgef2, Atp7a
GO:0015812	0.0506013		0.991142	3	17	gamma-aminobutyric acid transport	BP	Hrh3, Cacnb4, Sv2a
GO:0002396	0.0507441		0.999341	1	2	MHC protein complex assembly	BP	H2-DMa
GO:0002501	0.0507441		0.999341	1	2	peptide antigen assembly with MHC protein complex	BP	H2-DMa
GO:0051001	0.050921		0.99519	2	8	negative regulation of nitric-oxide synthase activity	BP	Cnr1, Gsk3b
GO:0042415	0.0511479		0.995027	2	9	norepinephrine metabolic process	BP	Spr, Atp7a
GO:0001616	0.0513838		1	1	1	growth hormone secretagogue receptor activity	MF	Ghsr
GO:0016520	0.0513838		1	1	1	growth hormone-releasing hormone receptor activity	MF	Ghsr
GO:0036321	0.0513838		1	1	1	ghrelin secretion	BP	Ghsr
GO:0051937	0.0517518		0.984635	5	48	catecholamine transport	BP	Ghsr, Hrh3, Cnr1, Cadps, Pcp4
GO:0098739	0.0522582		0.984538	5	43	import across plasma membrane	BP	Slc9a9, Fam155a, Slc1a2, Slc9a6, Slc8a3
GO:0051453	0.0523718		0.982236	6	60	regulation of intracellular pH	BP	Slc4a8, Slc9a9, Clcn3, Slc9a6, Bcl2, Chp1
GO:0050942	0.0524101		0.995145	2	7	positive regulation of pigment cell differentiation	BP	Zeb2, Bcl2
GO:2000405	0.0527658		1	1	1	negative regulation of T cell migration	BP	Lrch1
GO:0098792	0.0530641		0.994734	2	9	xenophagy	BP	Optn, Lgals8
GO:0038167	0.0530816		1	1	1	epidermal growth factor receptor signaling pathway via positive regulation of NF-kappaB transcription factor activity	BP	Rassf2
GO:0038168	0.0530816		1	1	1	epidermal growth factor receptor signaling pathway via I-kappaB kinase/NF-kappaB cascade	BP	Rassf2
GO:0050879	0.0532017		0.987017	4	28	multicellular organismal movement	BP	Spr, Atp8a2, Chrna1, Slc8a3
GO:0050881	0.0532017		0.987017	4	28	musculoskeletal movement	BP	Spr, Atp8a2, Chrna1, Slc8a3
GO:0039007	0.0532754		1	1	1	pronephric nephron morphogenesis	BP	Ahi1
GO:0039008	0.0532754		1	1	1	pronephric nephron tubule morphogenesis	BP	Ahi1
GO:0004077	0.053303		1	1	1	biotin-[acetyl-CoA-carboxylase] ligase activity	MF	Hlcs
GO:0004078	0.053303		1	1	1	biotin-[methylcrotonoyl-CoA-carboxylase] ligase activity	MF	Hlcs
GO:0004079	0.053303		1	1	1	biotin-[methylmalonyl-CoA-carboxytransferase] ligase activity	MF	Hlcs
GO:0004080	0.053303		1	1	1	biotin-[propionyl-CoA-carboxylase (ATP-hydrolyzing)] ligase activity	MF	Hlcs
GO:0009305	0.053303		1	1	1	protein biotinylation	BP	Hlcs
GO:0018271	0.053303		1	1	1	biotin-protein ligase activity	MF	Hlcs
GO:0070781	0.053303		1	1	1	response to biotin	BP	Hlcs
GO:0071110	0.053303		1	1	1	histone biotinylation	BP	Hlcs
GO:0032848	0.0533973		1	1	1	negative regulation of cellular pH reduction	BP	Bcl2
GO:0043375	0.0533973		1	1	1	CD8-positive, alpha-beta T cell lineage commitment	BP	Bcl2
GO:0046671	0.0533973		1	1	1	negative regulation of retinal cell programmed cell death	BP	Bcl2
GO:0043914	0.0534408		1	1	1	NADPH:sulfur oxidoreductase activity	MF	Mical2
GO:0000038	0.0537208		0.990185	3	20	very long-chain fatty acid metabolic process	BP	Elovl2, Elovl4, Elovl6
GO:0014904	0.0539515		0.986699	4	30	myotube cell development	BP	Smyd3, Rcan1, Bcl2, Ryr1
GO:0006873	0.0540796		0.966251	25	396	cellular ion homeostasis	BP	Hap1, Slc4a8, Stim1, Hrh3, Slc9a9, Wfs1, Trdn, Cacnb4, Clcn3, Cacnb3, Fam155a, Nucb2, Mcur1, Dbi, Sv2a, Adcy5, Ank2, Slc9a6, Tmem178, Slc8a3, Micu2, Bcl2, Atp7a, Chp1, Ryr1
GO:0046038	0.0545521		0.999236	1	2	GMP catabolic process	BP	Hprt
GO:0061614	0.0547837		0.986426	4	30	pri-miRNA transcription from RNA polymerase II promoter	BP	Jun, Tead1, Nfib, Stat3
GO:0033033	0.0548149		0.994461	2	9	negative regulation of myeloid cell apoptotic process	BP	Ghsr, Bcl2
GO:2001223	0.0549057		0.994591	2	8	negative regulation of neuron migration	BP	Stat3, Gsk3b
GO:0016668	0.0549894		0.994228	2	11	oxidoreductase activity, acting on a sulfur group of donors, NAD(P) as acceptor	MF	Nxn, Gsr
GO:0045724	0.0550413		0.989962	3	18	positive regulation of cilium assembly	BP	Hap1, Cep120, Cep135
5140	0.055113		0.986222	4	33	Leishmaniasis	KEGG	Jun, Tgfb3, H2-DMa, Jak1
GO:0032502	0.0552919		0.954237	198	3936	developmental process	BP	Sostdc1, Themis, Ghsr, Peg10, Rhoq, Rspo3, Nyap2, Zhx2, Nefm, Nrn1, Pcdh17, Osbpl8, Pcdh8, Txnip, Cntn2, Fzd1, Sla, Hap1, Spr, Hdac11, Plxnc1, Arrdc3, Slc4a8, Vav2, Coprs, Stim1, Fbxo9, Islr2, Jun, Ust, Hipk1, Tead1, Nxn, Kirrel3, Myo3b, Nfib, Tcp11, Lama2, Pcdhb1, Ppp2r1b, Kndc1, Morc1, Wfs1, Cenpf, Arsb, Shb, Dock11, Trappc9, Cntfr, Ank1, Tacc1, Nup93, Olfm4, Stat3, Lgi1, Scel, Myt1l, Tgfb3, Na…
GO:0016763	0.05538		0.986078	4	35	transferase activity, transferring pentosyl groups	MF	Hprt, Parp8, Poglut1, Xxylt1
GO:2001171	0.0553999		0.994369	2	9	positive regulation of ATP biosynthetic process	BP	Stat3, Ppargc1a
GO:0043103	0.0556311		0.999205	1	2	hypoxanthine salvage	BP	Hprt
GO:0036058	0.0556722		1	1	1	filtration diaphragm assembly	BP	Ptpro
GO:0036060	0.0556722		1	1	1	slit diaphragm assembly	BP	Ptpro
GO:0046502	0.0557328		0.999203	1	2	uroporphyrinogen III metabolic process	BP	Uros
GO:0045820	0.0557618		0.994311	2	9	negative regulation of glycolytic process	BP	Stat3, Ppargc1a
GO:0072702	0.0557819		1	1	1	response to methyl methanesulfonate	BP	Trp53inp1
GO:0072703	0.0557819		1	1	1	cellular response to methyl methanesulfonate	BP	Trp53inp1
GO:0051051	0.0558065		0.965787	23	369	negative regulation of transport	BP	Ghsr, Rhoq, Fzd1, Hrh3, Trdn, Cnr1, Anxa5, Ndfip2, Ahi1, Ndufaf2, Hadh, Nucb2, Ubqln2, Pkia, Wnk1, Gsk3b, Irs1, Bcl2, Kcnj11, Atp7a, Tnfrsf21, Gopc, Chp1
GO:0035094	0.0559442		0.989666	3	19	response to nicotine	BP	Cnr1, Chrna1, Bcl2
GO:0004859	0.0559667		0.999196	1	2	phospholipase inhibitor activity	MF	Anxa3
GO:0019834	0.0559667		0.999196	1	2	phospholipase A2 inhibitor activity	MF	Anxa3
GO:0048306	0.0560674		0.982961	5	49	calcium-dependent protein binding	MF	Masp1, Wfs1, Cplx2, Anxa3, Chp1
GO:2001259	0.0561076		0.983117	5	41	positive regulation of cation channel activity	BP	Hap1, Stim1, Trdn, Ank2, Kcnj11
GO:0045745	0.056183		0.989547	3	20	positive regulation of G-protein coupled receptor protein signaling pathway	BP	Cntn2, Arrdc3, Ubqln2
GO:0006666	0.0566366		1	1	1	3-keto-sphinganine metabolic process	BP	Kdsr
GO:0047560	0.0566366		1	1	1	3-dehydrosphinganine reductase activity	MF	Kdsr
GO:0045634	0.0566427		0.994519	2	7	regulation of melanocyte differentiation	BP	Zeb2, Bcl2
GO:0036309	0.0568273		1	1	1	protein localization to M-band	BP	Ank2
GO:0036371	0.0568273		1	1	1	protein localization to T-tubule	BP	Ank2
GO:0006818	0.0569864		0.982408	5	63	hydrogen transport	BP	Slc9a6, Atp6v1g2, Atp7a, Slc36a1, Chp1
GO:0015992	0.0569864		0.982408	5	63	proton transport	BP	Slc9a6, Atp6v1g2, Atp7a, Slc36a1, Chp1
GO:0098662	0.0570528		0.96456	24	382	inorganic cation transmembrane transport	BP	Cacng5, Hap1, Kcnc4, Stim1, Glrx, Slc9a9, Trdn, Cacnb4, Cacnb3, Fam155a, Mcur1, Dbi, Kcna3, Scn1b, Ank2, Kcnk10, Slc9a6, Slc8a3, Micu2, Kcnj11, Atp7a, Kcnj16, Chp1, Ryr1
GO:0030549	0.0574597		0.999152	1	2	acetylcholine receptor activator activity	MF	Ly6g6e
GO:1990172	0.0575311		1	1	1	G-protein coupled receptor catabolic process	BP	Gprasp1
GO:0043523	0.0577077		0.969522	14	202	regulation of neuron apoptotic process	BP	Optn, Jun, Wfs1, Cntfr, Tgfb3, Faim2, Gsk3b, Sncb, Pak3, Bcl2, Ppargc1a, Gclc, Atp7a, Pcp4
GO:0036158	0.057785		0.993765	2	11	outer dynein arm assembly	BP	Dnah5, Zmynd10
GO:0048087	0.057992		0.994108	2	8	positive regulation of developmental pigmentation	BP	Zeb2, Bcl2
GO:0072503	0.0587289		0.965683	19	281	cellular divalent inorganic cation homeostasis	BP	Hap1, Stim1, Hrh3, Wfs1, Trdn, Cacnb4, Cacnb3, Fam155a, Nucb2, Mcur1, Dbi, Sv2a, Adcy5, Ank2, Tmem178, Slc8a3, Micu2, Bcl2, Ryr1
GO:0098660	0.0587572		0.962658	26	419	inorganic ion transmembrane transport	BP	Cacng5, Hap1, Kcnc4, Stim1, Glrx, Slc9a9, Trdn, Cacnb4, Clcn3, Cacnb3, Fam155a, Mcur1, Dbi, Kcna3, Scn1b, Ank2, Kcnk10, Slc9a6, Slc8a3, Micu2, Gabrg2, Kcnj11, Atp7a, Kcnj16, Chp1, Ryr1
GO:0051220	0.0592875		0.988726	3	20	cytoplasmic sequestering of protein	BP	Dzip1, Ywhab, Gopc
GO:1902203	0.0594955		1	1	1	negative regulation of hepatocyte growth factor receptor signaling pathway	BP	Adamts12
GO:2001112	0.0594955		1	1	1	regulation of cellular response to hepatocyte growth factor stimulus	BP	Adamts12
GO:2001113	0.0594955		1	1	1	negative regulation of cellular response to hepatocyte growth factor stimulus	BP	Adamts12
GO:0010155	0.059589		0.993458	2	11	regulation of proton transport	BP	Atp7a, Chp1
GO:0002931	0.0596778		0.988516	3	22	response to ischemia	BP	Faim2, Rcan1, Bcl2
GO:0051281	0.0600585		0.988464	3	21	positive regulation of release of sequestered calcium ion into cytosol	BP	Hap1, Trdn, Dbi
GO:0051402	0.0602748		0.96718	15	222	neuron apoptotic process	BP	Optn, Jun, Wfs1, Cntfr, Tgfb3, Faim2, Gsk3b, Sncb, Pak3, Bcl2, Ppargc1a, Gclc, Atp7a, Pcp4, Tnfrsf21
GO:1903210	0.0604852		1	1	1	glomerular visceral epithelial cell apoptotic process	BP	Ppargc1a
GO:1904633	0.0604852		1	1	1	regulation of glomerular visceral epithelial cell apoptotic process	BP	Ppargc1a
GO:1904635	0.0604852		1	1	1	positive regulation of glomerular visceral epithelial cell apoptotic process	BP	Ppargc1a
GO:2000184	0.0604852		1	1	1	positive regulation of progesterone biosynthetic process	BP	Ppargc1a
GO:0050433	0.0605038		0.984315	4	36	regulation of catecholamine secretion	BP	Ghsr, Hrh3, Cnr1, Pcp4
GO:0004852	0.0608352		0.999047	1	2	uroporphyrinogen-III synthase activity	MF	Uros
GO:0045655	0.0610599		0.993312	2	10	regulation of monocyte differentiation	BP	Jun, Ctnnbip1
GO:0048630	0.0610829		0.993441	2	9	skeletal muscle tissue growth	BP	Chrna1, Mstn
GO:1900477	0.0611008		1	1	1	negative regulation of G1/S transition of mitotic cell cycle by negative regulation of transcription from RNA polymerase II promoter	BP	Nacc2
GO:0048020	0.0611147		0.993303	2	10	CCR chemokine receptor binding	MF	Stat3, Jak1
GO:0022836	0.0611886		0.965942	16	221	gated channel activity	MF	Cacng5, Kcnc4, Gabrq, Cacnb4, Gabra3, Clcn3, Cacnb3, Fam155a, Kcna3, Scn1b, Chrna1, Ano10, Gabrg2, Kcnj11, Kcnj16, Ryr1
GO:0030317	0.0613696		0.980852	5	50	flagellated sperm motility	BP	Anxa5, Dnah5, Neurl1a, Ttll5, Dpcd
GO:0030641	0.0613711		0.978307	6	63	regulation of cellular pH	BP	Slc4a8, Slc9a9, Clcn3, Slc9a6, Bcl2, Chp1
GO:0035799	0.0614559		1	1	1	ureter maturation	BP	Ret
GO:0030165	0.0614582		0.97281	9	102	PDZ domain binding	MF	Fzd1, Kirrel3, Dtna, Clcn3, Sdc2, Rapgef2, Mpp2, Nsf, Mpp6
GO:0016903	0.0619284		0.983795	4	37	oxidoreductase activity, acting on the aldehyde or oxo group of donors	MF	Aldh7a1, Aldh3a2, Aldh9a1, Aldh4a1
GO:0000415	0.062009		1	1	1	negative regulation of histone H3-K36 methylation	BP	Bcor
GO:0070171	0.062009		1	1	1	negative regulation of tooth mineralization	BP	Bcor
GO:1901681	0.0620147		0.969847	11	146	sulfur compound binding	MF	Adamts8, Rspo3, Hlcs, Hist1h1a, Tpk1, Gsr, Nrp2, Acot7, Dbi, Mstn, Postn
GO:0032536	0.0625772		0.993189	2	9	regulation of cell projection size	BP	Nefm, Cntn2
GO:0019395	0.0628079		0.977564	6	71	fatty acid oxidation	BP	Cnr1, Hadh, Nucb2, Dbi, Irs1, Ppargc1a
GO:0034440	0.0628079		0.977564	6	71	lipid oxidation	BP	Cnr1, Hadh, Nucb2, Dbi, Irs1, Ppargc1a
GO:0060259	0.0629093		0.987685	3	21	regulation of feeding behavior	BP	Ghsr, Stat3, Cnr1
GO:0070296	0.0629687		0.987868	3	18	sarcoplasmic reticulum calcium ion transport	BP	Trdn, Ank2, Ryr1
GO:0050767	0.0629751		0.95576	41	674	regulation of neurogenesis	BP	Zhx2, Nefm, Cntn2, Fzd1, Hap1, Plxnc1, Islr2, Ust, Kndc1, Arsb, Stat3, Cnr1, Tbr1, Ret, Nr2e1, Ahi1, Xrcc5, Grn, Skil, Bcl11a, Zeb2, Dscam, Atp8a2, Gsk3b, Scn1b, Bend6, Map2, Pak3, Neurl1a, Sdc2, Inpp5f, Bcl2, Rapgef2, Trak1, Epha3, Nap1l2, Pbx1, Impact, Pcp4, Tnfrsf21, Stau2
GO:0007610	0.0630361		0.957777	32	506	behavior	BP	Ghsr, Pcdh17, Cntn2, Nipal3, Arrdc3, Hrh3, Jun, Prokr2, Kirrel3, Cntfr, Stat3, Cnr1, Tbr1, Cacnb4, Nr2e1, Hprt, Ahi1, Clcn3, Grn, Slc1a2, Dbi, Dscam, Atp8a2, Adcy5, Meis2, Rcan1, Slc8a3, Inpp5f, Bcl2, Gabrg2, Nr2c2, Atp7a
GO:2001275	0.0632329		0.993255	2	8	positive regulation of glucose import in response to insulin stimulus	BP	Osbpl8, Irs1
GO:0035587	0.0633563		0.993056	2	9	purinergic receptor signaling pathway	BP	Cntn2, Adcy5
GO:0042559	0.0634953		0.992683	2	12	pteridine-containing compound biosynthetic process	BP	Gch1, Spr
GO:1902992	0.0635982		0.992873	2	10	negative regulation of amyloid precursor protein catabolic process	BP	Hap1, Flot2
GO:0120054	0.0638692		0.998948	1	2	intestinal motility	BP	Ghsr
GO:0120055	0.0638692		0.998948	1	2	small intestinal transit	BP	Ghsr
GO:0120057	0.0638692		0.998948	1	2	regulation of small intestinal transit	BP	Ghsr
GO:0120058	0.0638692		0.998948	1	2	positive regulation of small intestinal transit	BP	Ghsr
GO:0014812	0.0639979		0.974964	7	74	muscle cell migration	BP	Plat, Parva, Bcl2, Ppargc1a, Dock5, Atp7a, Postn
4612	0.0641008		0.982936	4	41	Antigen processing and presentation	KEGG	Tap1, Tapbp, H2-DMa, Rfx5
GO:0060052	0.064174		0.992771	2	10	neurofilament cytoskeleton organization	BP	Nefm, Atp8a2
GO:0021952	0.0642477		0.983368	4	27	central nervous system projection neuron axonogenesis	BP	Nfib, Nr2e1, Zeb2, Scn1b
GO:0050808	0.0642854		0.962666	18	245	synapse organization	BP	Ghsr, Pcdh17, Cntn2, Kirrel3, Pcdhb1, Pcdhgc4, Cacnb4, Flrt1, Cacnb3, Gpm6a, Nfia, Sncb, Pcdhgc5, Chrna1, Neurl1a, Slc9a6, Pcdhgc3, Stau2
GO:0017198	0.0646236		0.998923	1	2	N-terminal peptidyl-serine acetylation	BP	Naa11
GO:0018002	0.0646236		0.998923	1	2	N-terminal peptidyl-glutamic acid acetylation	BP	Naa11
GO:0030920	0.0646236		0.998923	1	2	peptidyl-serine acetylation	BP	Naa11
GO:1990190	0.0646236		0.998923	1	2	peptide-glutamate-N-acetyltransferase activity	MF	Naa11
GO:0004357	0.0647197		0.99892	1	2	glutamate-cysteine ligase activity	MF	Gclc
GO:0051195	0.0647325		0.992673	2	10	negative regulation of cofactor metabolic process	BP	Stat3, Ppargc1a
GO:0051198	0.0647325		0.992673	2	10	negative regulation of coenzyme metabolic process	BP	Stat3, Ppargc1a
GO:0014061	0.0649109		0.992641	2	10	regulation of norepinephrine secretion	BP	Ghsr, Hrh3
GO:0048243	0.0649109		0.992641	2	10	norepinephrine secretion	BP	Ghsr, Hrh3
GO:0034767	0.0649736		0.972545	8	92	positive regulation of ion transmembrane transport	BP	Hap1, Stim1, Glrx, Trdn, Dbi, Ank2, Kcnj11, Chp1
GO:0001822	0.0649783		0.96516	14	182	kidney development	BP	Kirrel3, Wfs1, Cenpf, Nup93, Ret, Ahi1, Ptpro, Cys1, Bcl2, Ctnnbip1, Cat, Pbx1, Kif26b, Odc1
GO:0009093	0.0650207		0.998909	1	2	cysteine catabolic process	BP	Cdo1
GO:0019448	0.0650207		0.998909	1	2	L-cysteine catabolic process	BP	Cdo1
GO:0019452	0.0650207		0.998909	1	2	L-cysteine catabolic process to taurine	BP	Cdo1
GO:0098719	0.0654972		0.992685	2	9	sodium ion import across plasma membrane	BP	Slc9a9, Slc9a6
GO:0090276	0.0658659		0.967658	11	144	regulation of peptide hormone secretion	BP	Ghsr, Glrx, Cnr1, Anxa5, Ndufaf2, Hadh, Nucb2, Adcy5, Irs1, Kcnj11, Epha5
GO:0046326	0.0659637		0.982541	4	32	positive regulation of glucose import	BP	Rhoq, Osbpl8, Slc1a2, Irs1
GO:0071318	0.0660911		0.992581	2	9	cellular response to ATP	BP	Pdxp, Ryr1
GO:0031952	0.0663557		0.982296	4	35	regulation of protein autophosphorylation	BP	Jun, Rassf2, Impact, Chp1
40	0.0665004		0.992235	2	11	Pentose and glucuronate interconversions	KEGG	Cryl1, Aldh3a2
GO:0051499	0.0666949		0.998851	1	2	D-aminoacyl-tRNA deacylase activity	MF	Dtd1
GO:0051500	0.0666949		0.998851	1	2	D-tyrosyl-tRNA(Tyr) deacylase activity	MF	Dtd1
GO:0021854	0.0667288		0.992193	2	11	hypothalamus development	BP	Hap1, Nrp2
GO:0051048	0.0668665		0.967055	11	149	negative regulation of secretion	BP	Ghsr, Hrh3, Cnr1, Anxa5, Ndufaf2, Hadh, Nucb2, Wnk1, Irs1, Kcnj11, Tnfrsf21
GO:0033306	0.0669913		0.998841	1	2	phytol metabolic process	BP	Aldh3a2
GO:1903173	0.0669913		0.998841	1	2	fatty alcohol metabolic process	BP	Aldh3a2
GO:0036112	0.0670983		0.998837	1	2	medium-chain fatty-acyl-CoA metabolic process	BP	Acot7
GO:0022037	0.0671717		0.971486	8	86	metencephalon development	BP	Hap1, Kndc1, Nanos1, Faim2, Zbtb18, Bcl2, Nr2c2, Atp7a
GO:0008637	0.0672397		0.973165	7	96	apoptotic mitochondrial changes	BP	Jun, Gsk3b, Bcl2, Mllt11, Mapk9, Gclc, Atp7a
GO:0015299	0.0672939		0.992368	2	9	solute:proton antiporter activity	MF	Slc9a9, Slc9a6
GO:0034757	0.0674028		1	1	1	negative regulation of iron ion transport	BP	Atp7a
GO:0034760	0.0674028		1	1	1	negative regulation of iron ion transmembrane transport	BP	Atp7a
GO:0070403	0.0674992		0.991862	2	13	NAD+ binding	MF	Cryl1, Hadh
GO:0086036	0.0675001		0.992528	2	8	regulation of cardiac muscle cell membrane potential	BP	Trdn, Ank2
GO:0021884	0.0677173		0.981961	4	31	forebrain neuron development	BP	Cntn2, Nrp2, Rapgef2, Atp7a
GO:0071109	0.067972		1	1	1	superior temporal gyrus development	BP	Gsk3b
GO:1904780	0.067972		1	1	1	negative regulation of protein localization to centrosome	BP	Gsk3b
GO:0072078	0.0682169		0.978163	5	46	nephron tubule morphogenesis	BP	Ahi1, Bcl2, Ctnnbip1, Pbx1, Kif26b
GO:1902895	0.0684536		0.986194	3	20	positive regulation of pri-miRNA transcription from RNA polymerase II promoter	BP	Jun, Tead1, Stat3
GO:0044026	0.068825		0.992927	2	6	DNA hypermethylation	BP	Morc1, Gsk3b
GO:0033883	0.0688705		0.998774	1	2	pyridoxal phosphatase activity	MF	Pdxp
GO:0004342	0.0690521		0.998767	1	2	glucosamine-6-phosphate deaminase activity	MF	Gnpda1
GO:0022804	0.0691225		0.960844	16	234	active transmembrane transporter activity	MF	Slc4a8, Tap1, Slc9a9, Anxa5, Slc16a6, Slco5a1, Clcn3, Slc17a8, Slc1a2, Slc9a6, Slc8a3, Atp6v1g2, Slc15a4, Slc17a6, Atp7a, Slc36a1
GO:0033198	0.0692236		0.985974	3	20	response to ATP	BP	Pdxp, Kcnj11, Ryr1
GO:0010565	0.0693403		0.972249	7	84	regulation of cellular ketone metabolic process	BP	Ghsr, Cnr1, Nucb2, Dbi, Irs1, Mapk9, Ppargc1a
GO:0032095	0.0693644		0.991508	2	13	regulation of response to food	BP	Ghsr, Nucb2
GO:0070050	0.0695163		0.991808	2	10	neuron cellular homeostasis	BP	Clcn3, Chrna1
GO:0060538	0.0696601		0.966819	10	127	skeletal muscle organ development	BP	Cntfr, Zbtb18, Rbfox1, Skil, Chrna1, Rcan1, Bcl2, Meg3, Mstn, Ryr1
GO:0097722	0.0696757		0.977443	5	51	sperm motility	BP	Anxa5, Dnah5, Neurl1a, Ttll5, Dpcd
GO:0048203	0.0697165		0.998743	1	2	vesicle targeting, trans-Golgi to endosome	BP	Wipi1
GO:2000795	0.0697516		1	1	1	negative regulation of epithelial cell proliferation involved in lung morphogenesis	BP	Nfib
GO:1903531	0.0697594		0.966723	10	133	negative regulation of secretion by cell	BP	Ghsr, Hrh3, Cnr1, Anxa5, Ndufaf2, Hadh, Nucb2, Irs1, Kcnj11, Tnfrsf21
GO:0014052	0.0700756		0.991704	2	10	regulation of gamma-aminobutyric acid secretion	BP	Hrh3, Sv2a
GO:0043369	0.0701731		0.992059	2	8	CD4-positive or CD8-positive, alpha-beta T cell lineage commitment	BP	Stat3, Bcl2
GO:0015275	0.0701978		0.998725	1	2	stretch-activated, cation-selective, calcium channel activity	MF	Fam155a
GO:0097201	0.070403		0.99151	2	11	negative regulation of transcription from RNA polymerase II promoter in response to stress	BP	Jun, Impact
GO:0072028	0.0705388		0.977177	5	47	nephron morphogenesis	BP	Ahi1, Bcl2, Ctnnbip1, Pbx1, Kif26b
GO:0072088	0.0705388		0.977177	5	47	nephron epithelium morphogenesis	BP	Ahi1, Bcl2, Ctnnbip1, Pbx1, Kif26b
GO:0016358	0.0707422		0.958409	18	246	dendrite development	BP	Kndc1, Nr2e1, Flrt1, Hprt, Grn, Bcl11a, Dscam, Gsk3b, Map2, Pak3, Neurl1a, Slc9a6, Sdc2, Rapgef2, Trak1, Epha5, Atp7a, Stau2
GO:0021767	0.0712031		1	1	1	mammillary body development	BP	Zeb2
GO:0048023	0.0712031		1	1	1	positive regulation of melanin biosynthetic process	BP	Zeb2
GO:0061373	0.0712031		1	1	1	mammillary axonal complex development	BP	Zeb2
GO:1900378	0.0712031		1	1	1	positive regulation of secondary metabolite biosynthetic process	BP	Zeb2
GO:1902748	0.0712031		1	1	1	positive regulation of lens fiber cell differentiation	BP	Zeb2
GO:1903056	0.0712031		1	1	1	regulation of melanosome organization	BP	Zeb2
GO:0006808	0.0712732		0.998685	1	2	regulation of nitrogen utilization	BP	Bcl2
GO:0090275	0.0713678		1	1	1	negative regulation of somatostatin secretion	BP	Irs1
GO:0005310	0.0714666		0.985257	3	21	dicarboxylic acid transmembrane transporter activity	MF	Slc17a8, Slc1a2, Slc17a6
GO:0051344	0.0716404		0.998671	1	2	negative regulation of cyclic-nucleotide phosphodiesterase activity	BP	Aip
GO:0001078	0.0716815		0.969052	8	95	transcriptional repressor activity, RNA polymerase II core promoter proximal region sequence-specific binding	MF	Nacc2, Myt1l, Nr2e1, Zbtb20, Skil, Bcl11a, Sp3, Tshz1
GO:0031497	0.0717701		0.970859	7	105	chromatin assembly	BP	Nap1l5, Hist1h1a, Smyd3, Anp32e, Tspyl4, Hist2h2bb, Nap1l2
GO:0021533	0.0717842		0.985314	3	19	cell differentiation in hindbrain	BP	Kndc1, Faim2, Atp7a
GO:0015874	0.0720816		0.991191	2	11	norepinephrine transport	BP	Ghsr, Hrh3
GO:0051900	0.0725245		0.991106	2	11	regulation of mitochondrial depolarization	BP	Mllt11, Gclc
GO:0070997	0.0727285		0.956329	19	300	neuron death	BP	Fzd1, Optn, Jun, Wfs1, Cntfr, Stat3, Tgfb3, Faim2, Magi1, Gsk3b, Sncb, Pak3, Bcl2, Ppargc1a, Gclc, Atp7a, Pcp4, Tnfrsf21, Chp1
GO:0001228	0.0728427		0.957685	17	244	transcriptional activator activity, RNA polymerase II transcription regulatory region sequence-specific binding	MF	Jun, Tead1, Nfib, Stat3, Myt1l, Creb5, Nr2e1, Stag1, Camta1, Nfia, Cys1, Zeb2, Nkrf, Meis2, Neurod6, Nr2c2, Pbx1
GO:0071206	0.0728994		1	1	1	establishment of protein localization to juxtaparanode region of axon	BP	Cntn2
GO:0046148	0.0730166		0.979703	4	41	pigment biosynthetic process	BP	Hprt, Zeb2, Rapgef2, Uros
GO:0051187	0.0731161		0.990778	2	13	cofactor catabolic process	BP	Acot7, Pdxp
GO:2000666	0.0731649		0.998613	1	2	negative regulation of interleukin-13 secretion	BP	Tnfrsf21
GO:0008649	0.0733894		0.990724	2	13	rRNA methyltransferase activity	MF	Tfb2m, Mettl15
GO:0140102	0.0733894		0.990724	2	13	catalytic activity, acting on a rRNA	MF	Tfb2m, Mettl15
GO:0043096	0.0734037		0.998146	1	3	purine nucleobase salvage	BP	Hprt
GO:0046370	0.0734048		0.998604	1	2	fructose biosynthetic process	BP	Gnpda1
GO:0043014	0.0734442		0.984552	3	23	alpha-tubulin binding	MF	Arl4c, Sncb, Ppargc1a
GO:0120031	0.073671		0.952963	24	383	plasma membrane bounded cell projection assembly	BP	Rhoq, Hap1, Vav2, Myo3b, Dock11, Tgfb3, Dynll2, Rapgef6, Ahi1, Parva, Dnah5, Gpm6a, Dzip1, Zmynd10, Ptpro, Cdc42ep2, Neurl1a, Ttll5, Cep120, Rapgef2, Atp7a, Cep135, Spata13, Stau2
300	0.0741114		0.998576	1	2	Lysine biosynthesis	KEGG	Aldh7a1
GO:0001659	0.074126		0.984348	3	23	temperature homeostasis	BP	Arrdc3, Stat3, Cnr1
GO:2000490	0.0742269		0.998572	1	2	negative regulation of hepatic stellate cell activation	BP	Gclc
GO:0003407	0.074279		0.979501	4	33	neural retina development	BP	Hipk1, Ahi1, Gpm6a, Atp8a2
GO:0031649	0.0743586		0.990895	2	10	heat generation	BP	Arrdc3, Cnr1
GO:0008502	0.074534		0.99856	1	2	melatonin receptor activity	MF	Gpr50
310	0.0746556		0.979321	4	34	Lysine degradation	KEGG	Hadh, Aldh7a1, Aldh3a2, Aldh9a1
GO:0031247	0.0746579		0.998555	1	2	actin rod assembly	BP	Pdxp
GO:0098808	0.0746664		0.998554	1	2	mRNA cap binding	MF	Ago2
GO:0051792	0.0748604		0.998547	1	2	medium-chain fatty acid biosynthetic process	BP	Acot7
GO:0036004	0.0749379		0.998544	1	2	GAF domain binding	MF	Aip
GO:1902857	0.0752112		0.990913	2	9	positive regulation of non-motile cilium assembly	BP	Hap1, Cep135
GO:0043270	0.0753047		0.959698	13	182	positive regulation of ion transport	BP	Hap1, Stim1, Glrx, Wfs1, Trdn, Dbi, Atp8a2, Scn1b, Ank2, Mapk9, Kcnj11, Pcp4, Chp1
GO:0098703	0.0755883		0.990509	2	11	calcium ion import across plasma membrane	BP	Fam155a, Slc8a3
GO:1902656	0.0755883		0.990509	2	11	calcium ion import into cytosol	BP	Fam155a, Slc8a3
GO:0006574	0.0756071		0.998517	1	2	valine catabolic process	BP	Hibadh
GO:0001920	0.0756686		0.998514	1	2	negative regulation of receptor recycling	BP	Optn
GO:0070588	0.0757107		0.95947	13	177	calcium ion transmembrane transport	BP	Cacng5, Hap1, Stim1, Trdn, Cacnb4, Cacnb3, Fam155a, Mcur1, Dbi, Ank2, Slc8a3, Micu2, Ryr1
GO:0005416	0.0758585		0.99079	2	9	cation:amino acid symporter activity	MF	Slc1a2, Slc36a1
GO:0005262	0.0759749		0.966903	8	86	calcium channel activity	MF	Cacng5, Stim1, Cacnb4, Cacnb3, Fam155a, Gpm6a, Pkd2l2, Ryr1
GO:0048856	0.076475		0.936075	184	3658	anatomical structure development	BP	Sostdc1, Themis, Ghsr, Peg10, Rhoq, Rspo3, Nyap2, Zhx2, Nefm, Nrn1, Pcdh17, Pcdh8, Txnip, Cntn2, Fzd1, Hap1, Spr, Hdac11, Plxnc1, Arrdc3, Slc4a8, Vav2, Coprs, Stim1, Islr2, Jun, Ust, Hipk1, Tead1, Nxn, Kirrel3, Myo3b, Nfib, Tcp11, Lama2, Pcdhb1, Ppp2r1b, Kndc1, Morc1, Wfs1, Cenpf, Arsb, Shb, Dock11, Trappc9, Cntfr, Ank1, Tacc1, Nup93, Olfm4, Stat3, Lgi1, Scel, Myt1l, Tgfb3, Nanos1, Creb5, Cnr1, T…
GO:0006534	0.076616		0.990181	2	12	cysteine metabolic process	BP	Cdo1, Gclc
GO:0051260	0.0766931		0.955872	16	253	protein homooligomerization	BP	Gch1, Kcnc4, Optn, Clpp, Olfm4, Lgi1, Nacc2, Anxa5, Hprt, Skil, Slc1a2, Kcna3, Atl3, Cat, Mpp2, Gopc
GO:0051960	0.0767647		0.944544	44	744	regulation of nervous system development	BP	Ghsr, Zhx2, Nefm, Cntn2, Fzd1, Hap1, Plxnc1, Islr2, Ust, Kndc1, Arsb, Stat3, Cnr1, Tbr1, Ret, Nr2e1, Flrt1, Ahi1, Xrcc5, Grn, Skil, Bcl11a, Zeb2, Dscam, Atp8a2, Gsk3b, Scn1b, Bend6, Map2, Pak3, Neurl1a, Sdc2, Inpp5f, Bcl2, Rapgef2, Trak1, Epha3, Nap1l2, Pbx1, Impact, Cpe, Pcp4, Tnfrsf21, Stau2
GO:2001257	0.0769842		0.964339	9	110	regulation of cation channel activity	BP	Cacng5, Hap1, Stim1, Trdn, Cacnb4, Cacnb3, Ank2, Kcnj11, Ppargc1a
GO:0007288	0.0772874		0.990172	2	11	sperm axoneme assembly	BP	Neurl1a, Ttll5
GO:0007169	0.0775749		0.949727	25	393	transmembrane receptor protein tyrosine kinase signaling pathway	BP	Ghsr, Rhoq, Osbpl8, Txnip, Sla, Hap1, Glrx, Plat, Stat3, Ret, Flrt1, Ahi1, Nrp2, Nucb2, Rassf2, Gsk3b, Neurl1a, Slc9a6, Irs1, Rapgef2, Adamts12, Epha3, Epha5, Mstn, Jak1
GO:0098957	0.0775792		0.998437	1	2	anterograde axonal transport of mitochondrion	BP	Trak1
GO:0015491	0.0777131		0.98348	3	20	cation:cation antiporter activity	MF	Slc9a9, Slc9a6, Slc8a3
GO:0045105	0.0777767		0.998429	1	2	intermediate filament polymerization or depolymerization	BP	Nefm
GO:1904020	0.0781375		0.998414	1	2	regulation of G-protein coupled receptor internalization	BP	Ubqln2
GO:1904021	0.0781375		0.998414	1	2	negative regulation of G-protein coupled receptor internalization	BP	Ubqln2
GO:1904732	0.0781875		0.998412	1	2	regulation of electron transfer activity	BP	Atp7a
GO:1904959	0.0781875		0.998412	1	2	regulation of cytochrome-c oxidase activity	BP	Atp7a
GO:0003360	0.0783083		0.998407	1	2	brainstem development	BP	Cntfr
GO:0035926	0.0787366		0.998389	1	2	chemokine (C-C motif) ligand 2 secretion	BP	Postn
GO:1904207	0.0787366		0.998389	1	2	regulation of chemokine (C-C motif) ligand 2 secretion	BP	Postn
GO:1904209	0.0787366		0.998389	1	2	positive regulation of chemokine (C-C motif) ligand 2 secretion	BP	Postn
GO:0019884	0.0787612		0.989464	2	15	antigen processing and presentation of exogenous antigen	BP	Tapbp, H2-DMa
GO:0002636	0.0788806		0.997854	1	3	positive regulation of germinal center formation	BP	H2-DMa
GO:0051962	0.0790076		0.94701	29	462	positive regulation of nervous system development	BP	Fzd1, Hap1, Plxnc1, Islr2, Arsb, Cnr1, Ret, Flrt1, Ahi1, Xrcc5, Grn, Skil, Bcl11a, Zeb2, Dscam, Atp8a2, Gsk3b, Scn1b, Bend6, Pak3, Neurl1a, Bcl2, Rapgef2, Trak1, Epha3, Nap1l2, Impact, Pcp4, Stau2
GO:0071475	0.0791338		0.99784	1	3	cellular hyperosmotic salinity response	BP	Xrcc5
GO:0001654	0.0794581		0.953312	17	241	eye development	BP	Jun, Hipk1, Stat3, Nr2e1, Crb1, Ahi1, Gpm6a, Skil, Col8a1, Zeb2, Dscam, Atp8a2, Meis2, Ttll5, Bcl2, Sp3, Stau2
GO:0015807	0.0794773		0.977474	4	35	L-amino acid transport	BP	Slc43a2, Slc17a8, Slc1a2, Slc36a1
GO:0008509	0.079643		0.956991	13	184	anion transmembrane transporter activity	MF	Slc43a2, Slc4a8, Gabrq, Slc16a6, Slco5a1, Gabra3, Clcn3, Slc17a8, Slc1a2, Slc15a4, Gabrg2, Slc17a6, Slc36a1
GO:1904057	0.0798855		0.998341	1	2	negative regulation of sensory perception of pain	BP	Kcnc4
GO:0001919	0.0802724		0.98248	3	23	regulation of receptor recycling	BP	Optn, Inpp5f, Nsf
GO:0042427	0.0803461		0.998321	1	2	serotonin biosynthetic process	BP	Gch1
GO:0042435	0.0803461		0.998321	1	2	indole-containing compound biosynthetic process	BP	Gch1
GO:1901162	0.0803461		0.998321	1	2	primary amino compound biosynthetic process	BP	Gch1
GO:0006772	0.0803558		0.998321	1	2	thiamine metabolic process	BP	Tpk1
GO:0042357	0.0803558		0.998321	1	2	thiamine diphosphate metabolic process	BP	Tpk1
GO:0042723	0.0803558		0.998321	1	2	thiamine-containing compound metabolic process	BP	Tpk1
GO:0004137	0.0805478		0.998312	1	2	deoxycytidine kinase activity	MF	Dck
GO:0046092	0.0805478		0.998312	1	2	deoxycytidine metabolic process	BP	Dck
GO:0030031	0.0805632		0.948045	24	388	cell projection assembly	BP	Rhoq, Hap1, Vav2, Myo3b, Dock11, Tgfb3, Dynll2, Rapgef6, Ahi1, Parva, Dnah5, Gpm6a, Dzip1, Zmynd10, Ptpro, Cdc42ep2, Neurl1a, Ttll5, Cep120, Rapgef2, Atp7a, Cep135, Spata13, Stau2
GO:0021957	0.0806664		0.989855	2	9	corticospinal tract morphogenesis	BP	Zeb2, Scn1b
GO:0032914	0.0807754		0.998303	1	2	positive regulation of transforming growth factor beta1 production	BP	Atp6ap2
GO:0032098	0.0809856		0.989077	2	14	regulation of appetite	BP	Ghsr, Nucb2
GO:0050932	0.0813272		0.989723	2	9	regulation of pigment cell differentiation	BP	Zeb2, Bcl2
GO:0006562	0.0814494		0.998273	1	2	proline catabolic process	BP	Aldh4a1
GO:0010133	0.0814494		0.998273	1	2	proline catabolic process to glutamate	BP	Aldh4a1
GO:0034312	0.0818406		0.988994	2	13	diol biosynthetic process	BP	Gch1, Spr
GO:0051953	0.0819419		0.98184	3	25	negative regulation of amine transport	BP	Ghsr, Hrh3, Cnr1
GO:0006558	0.0821419		0.997669	1	3	L-phenylalanine metabolic process	BP	Spr
GO:1902221	0.0821419		0.997669	1	3	erythrose 4-phosphate/phosphoenolpyruvate family amino acid metabolic process	BP	Spr
GO:0043133	0.0822862		0.998237	1	2	hindgut contraction	BP	Ghsr
GO:0043134	0.0822862		0.998237	1	2	regulation of hindgut contraction	BP	Ghsr
GO:0050801	0.0823153		0.944527	29	491	ion homeostasis	BP	Hap1, Slc4a8, Stim1, Hrh3, Slc9a9, Wfs1, Trdn, Ank1, Cacnb4, Clcn3, Cacnb3, Fam155a, Nucb2, Mcur1, Dbi, Sv2a, Scn1b, Adcy5, Ank2, Slc9a6, Tmem178, Slc8a3, Micu2, Bcl2, Mllt11, Gclc, Atp7a, Chp1, Ryr1
GO:0010523	0.0827024		0.988928	2	12	negative regulation of calcium ion transport into cytosol	BP	Trdn, Bcl2
GO:0050709	0.0827885		0.965476	7	85	negative regulation of protein secretion	BP	Ghsr, Anxa5, Ndufaf2, Hadh, Irs1, Kcnj11, Tnfrsf21
GO:0032769	0.0830657		0.988993	2	11	negative regulation of monooxygenase activity	BP	Cnr1, Gsk3b
GO:0032571	0.0831154		0.998201	1	2	response to vitamin K	BP	Postn
GO:0071307	0.0831154		0.998201	1	2	cellular response to vitamin K	BP	Postn
GO:0050848	0.0834444		0.971572	5	50	regulation of calcium-mediated signaling	BP	Hap1, Lmcd1, Trdn, Rcan1, Chp1
GO:0036151	0.0837306		0.997576	1	3	phosphatidylcholine acyl-chain remodeling	BP	Dbi
GO:0043392	0.0839598		0.975674	4	37	negative regulation of DNA binding	BP	Jun, Nfib, Ctnnbip1, Habp4
GO:0034764	0.0840923		0.962396	8	99	positive regulation of transmembrane transport	BP	Hap1, Stim1, Glrx, Trdn, Dbi, Ank2, Kcnj11, Chp1
GO:0019287	0.0841642		0.99755	1	3	isopentenyl diphosphate biosynthetic process, mevalonate pathway	BP	Mvk
GO:0031167	0.0843951		0.988346	2	14	rRNA methylation	BP	Tfb2m, Mettl15
GO:0032714	0.084442		0.998141	1	2	negative regulation of interleukin-5 production	BP	Tnfrsf21
GO:0005290	0.084456		0.998141	1	2	L-histidine transmembrane transporter activity	MF	Slc15a4
GO:0048813	0.0846571		0.955219	12	151	dendrite morphogenesis	BP	Kndc1, Nr2e1, Hprt, Dscam, Gsk3b, Pak3, Sdc2, Rapgef2, Trak1, Epha5, Atp7a, Stau2
GO:0048632	0.0848068		0.998125	1	2	negative regulation of skeletal muscle tissue growth	BP	Mstn
GO:0030862	0.084813		0.998125	1	2	positive regulation of polarized epithelial cell differentiation	BP	Ahi1
GO:0034756	0.0848179		0.998124	1	2	regulation of iron ion transport	BP	Atp7a
GO:0034759	0.0848179		0.998124	1	2	regulation of iron ion transmembrane transport	BP	Atp7a
GO:0032901	0.0850023		0.998116	1	2	positive regulation of neurotrophin production	BP	Hap1
GO:0030291	0.0850569		0.980746	3	27	protein serine/threonine kinase inhibitor activity	MF	Pkia, Wnk1, Spred2
GO:0048755	0.0852013		0.988721	2	10	branching morphogenesis of a nerve	BP	Bcl11a, Cpe
GO:0046889	0.0852836		0.970634	5	55	positive regulation of lipid biosynthetic process	BP	Dbi, Mapk9, Ppargc1a, Acsl3, Ccdc3
780	0.0853354		0.998101	1	2	Biotin metabolism	KEGG	Hlcs
GO:1904685	0.0855598		0.998091	1	2	positive regulation of metalloendopeptidase activity	BP	Stat3
GO:0015440	0.086253		0.998059	1	2	peptide-transporting ATPase activity	MF	Tap1
GO:0001655	0.086323		0.949603	16	225	urogenital system development	BP	Kirrel3, Wfs1, Cenpf, Nup93, Ret, Ahi1, Ptpro, Nfia, Cys1, Bcl2, Ctnnbip1, Cat, Pbx1, Emx2, Kif26b, Odc1
5310	0.0863565		0.997418	1	3	Asthma	KEGG	H2-DMa
GO:0031645	0.0863687		0.988295	2	11	negative regulation of neurological system process	BP	Kcnc4, Tnfrsf21
GO:0034230	0.0865564		0.998045	1	2	enkephalin processing	BP	Cpe
GO:0007154	0.0865711		0.927381	177	3556	cell communication	BP	Sostdc1, Cacng5, Themis, Ghsr, Gpr50, Peg10, Rhoq, Rgs13, Rspo3, Nyap2, Pcdh17, Osbpl8, Pcdh8, Txnip, Cntn2, Fzd1, Sla, Ly6g6e, Hap1, Rassf5, Dclk3, Plxnc1, Kcnc4, Arrdc3, Vav2, Optn, Fbxo9, Tspan9, Hrh3, Jun, Sipa1l2, Glrx, Hipk1, Prokr2, Dusp16, Tead1, Plat, Gabrq, Nxn, Lmcd1, Tcp11, Lama2, Pcdhb1, Stk32b, Ppp2r1b, Kndc1, Wfs1, Trdn, Shb, Dock11, Cntfr, Ank1, Rgs5, Nup93, Olfm4, Rnase4, Arl4c, …
GO:0050999	0.0868365		0.980412	3	23	regulation of nitric-oxide synthase activity	BP	Gch1, Cnr1, Gsk3b
GO:0035279	0.0874313		0.998004	1	2	mRNA cleavage involved in gene silencing by miRNA	BP	Ago2
GO:0098795	0.0874313		0.998004	1	2	mRNA cleavage involved in gene silencing	BP	Ago2
GO:0072507	0.0874916		0.946241	19	294	divalent inorganic cation homeostasis	BP	Hap1, Stim1, Hrh3, Wfs1, Trdn, Cacnb4, Cacnb3, Fam155a, Nucb2, Mcur1, Dbi, Sv2a, Adcy5, Ank2, Tmem178, Slc8a3, Micu2, Bcl2, Ryr1
GO:0001227	0.0876087		0.954752	11	151	transcriptional repressor activity, RNA polymerase II transcription regulatory region sequence-specific binding	MF	Nacc2, Myt1l, Nr2e1, Zbtb20, Skil, Bcl11a, Zeb2, Cggbp1, Klf12, Sp3, Tshz1
GO:0015298	0.0876353		0.980315	3	21	solute:cation antiporter activity	MF	Slc9a9, Slc9a6, Slc8a3
GO:1901860	0.0878022		0.997987	1	2	positive regulation of mitochondrial DNA metabolic process	BP	Ppargc1a
GO:0046100	0.0879749		0.997319	1	3	hypoxanthine metabolic process	BP	Hprt
GO:0046101	0.0879749		0.997319	1	3	hypoxanthine biosynthetic process	BP	Hprt
GO:0031069	0.0884845		0.979958	3	22	hair follicle morphogenesis	BP	Sostdc1, Bcl2, Atp7a
GO:0060390	0.0885616		0.987824	2	11	regulation of SMAD protein import into nucleus	BP	Nup93, Tgfb3
GO:0023029	0.0888183		0.997939	1	2	MHC class Ib protein binding	MF	Tap1
GO:0006953	0.088867		0.987947	2	10	acute-phase response	BP	Stat3, Cnr1
GO:0019226	0.0889993		0.965381	6	65	transmission of nerve impulse	BP	Cacng5, Ghsr, Kcnc4, Cacnb4, Scn1b, Chrna1
GO:0004043	0.0890071		0.99793	1	2	L-aminoadipate-semialdehyde dehydrogenase activity	MF	Aldh7a1
GO:0019153	0.0890101		0.997254	1	3	protein-disulfide reductase (glutathione) activity	MF	Glrx
GO:0000188	0.0890964		0.987551	2	12	inactivation of MAPK activity	BP	Dusp16, Spred2
GO:0031699	0.0893994		0.997911	1	2	beta-3 adrenergic receptor binding	MF	Arrdc3
GO:0010888	0.0898593		0.987541	2	11	negative regulation of lipid storage	BP	Osbpl8, Abhd5
GO:0006576	0.0899445		0.979105	3	28	cellular biogenic amine metabolic process	BP	Gde1, Atp7a, Odc1
GO:2000845	0.0901893		0.997873	1	2	positive regulation of testosterone secretion	BP	Nucb2
GO:0021879	0.0902175		0.968554	5	50	forebrain neuron differentiation	BP	Cntn2, Tbr1, Nrp2, Rapgef2, Atp7a
GO:0010828	0.0905709		0.973114	4	36	positive regulation of glucose transport	BP	Rhoq, Osbpl8, Slc1a2, Irs1
GO:2001245	0.0906215		0.997151	1	3	regulation of phosphatidylcholine biosynthetic process	BP	Acsl3
GO:0046983	0.0907243		0.93243	49	950	protein dimerization activity	MF	Zhx2, Nefm, Nrn1, Gch1, Fzd1, Cryl1, Hlcs, Spr, Tap1, Jun, Tead1, Masp1, Cenpf, Olfm4, Stat3, Nacc2, Tgfb3, Dynll2, Cadm2, Gsr, Lifr, Hprt, Clcn3, Ptpro, Dst, Acot7, Dbi, Bcl11a, Dck, Adcy5, Zhx1, Mxi1, Neurod6, Inpp5f, Micu2, Pdxp, Bcl2, Flot2, Cat, Aldh9a1, Taf9b, Nr2c2, Tmem192, Gclc, Pbx1, Runx1t1, Mstn, Odc1, Gopc
GO:0043269	0.0907912		0.939104	27	453	regulation of ion transport	BP	Cacng5, Hap1, Kcnc4, Stim1, Hrh3, Glrx, Wfs1, Trdn, Cnr1, Cacnb4, Cacnb3, Dbi, Wnk1, Kcna3, Sv2a, Atp8a2, Scn1b, Ank2, Bcl2, Mapk9, Kcnj11, Ppargc1a, Atp7a, Kcnj16, Pcp4, Gopc, Chp1
GO:1904456	0.0910087		0.997833	1	2	negative regulation of neuronal action potential	BP	Kcnc4
GO:0046943	0.0911807		0.961121	7	84	carboxylic acid transmembrane transporter activity	MF	Slc43a2, Slc16a6, Slc17a8, Slc1a2, Slc15a4, Slc17a6, Slc36a1
GO:0035425	0.0914138		0.997814	1	2	autocrine signaling	BP	Fzd1
GO:0051882	0.0914255		0.986781	2	14	mitochondrial depolarization	BP	Mllt11, Gclc
GO:0033387	0.0915432		0.997807	1	2	putrescine biosynthetic process from ornithine	BP	Odc1
GO:1904761	0.091587		0.997805	1	2	negative regulation of myofibroblast differentiation	BP	Trp53inp1
GO:0021987	0.0916419		0.958333	8	93	cerebral cortex development	BP	Trappc9, Tacc1, Nr2e1, Nrp2, Zbtb18, Gsk3b, Cep120, Emx2
GO:0003032	0.0918936		0.99779	1	2	detection of oxygen	BP	Tgfb3
GO:0051928	0.0923066		0.963689	6	68	positive regulation of calcium ion transport	BP	Hap1, Stim1, Wfs1, Trdn, Dbi, Ank2
GO:0017075	0.0924368		0.978762	3	21	syntaxin-1 binding	MF	Unc13c, Cplx2, Nsf
GO:0039020	0.0924676		0.997762	1	2	pronephric nephron tubule development	BP	Ahi1
GO:0072114	0.0924676		0.997762	1	2	pronephros morphogenesis	BP	Ahi1
GO:0055080	0.0925883		0.938257	26	438	cation homeostasis	BP	Hap1, Slc4a8, Stim1, Hrh3, Slc9a9, Wfs1, Trdn, Ank1, Cacnb4, Clcn3, Cacnb3, Fam155a, Nucb2, Mcur1, Dbi, Sv2a, Adcy5, Ank2, Slc9a6, Tmem178, Slc8a3, Micu2, Bcl2, Atp7a, Chp1, Ryr1
GO:1905564	0.0927472		0.997013	1	3	positive regulation of vascular endothelial cell proliferation	BP	Ghsr
GO:0098930	0.0927769		0.972143	4	38	axonal transport	BP	Hap1, Ap3m2, Dst, Trak1
GO:0004046	0.09286		0.997006	1	3	aminoacylase activity	MF	Cat
GO:0006885	0.0928827		0.963346	6	71	regulation of pH	BP	Slc4a8, Slc9a9, Clcn3, Slc9a6, Bcl2, Chp1
GO:0044338	0.092926		0.997739	1	2	canonical Wnt signaling pathway involved in mesenchymal stem cell differentiation	BP	Fzd1
GO:0006979	0.0929726		0.944029	17	290	response to oxidative stress	BP	Gpx8, Gch1, Txnip, Fzd1, Jun, Glrx, Nup93, Trp53inp1, Rcan1, Bcl2, Aldh3a2, Cat, Mapk9, Ppargc1a, Gclc, Atp7a, Impact
GO:0051597	0.0932534		0.997722	1	2	response to methylmercury	BP	Arsb
GO:0016651	0.0933343		0.971441	4	55	oxidoreductase activity, acting on NAD(P)H	MF	Nxn, Gsr, Ndufaf2, Cyb5r3
GO:0021966	0.0934905		0.997711	1	2	corticospinal neuron axon guidance	BP	Scn1b
GO:0030742	0.0935251		0.978157	3	24	GTP-dependent protein binding	MF	Gch1, Rab3d, Rapgef6
GO:0015813	0.0938399		0.986659	2	11	L-glutamate transport	BP	Slc17a8, Slc1a2
GO:0042414	0.0938949		0.99769	1	2	epinephrine metabolic process	BP	Atp7a
GO:0006865	0.0944376		0.956699	8	99	amino acid transport	BP	Slc43a2, Hrh3, Cacnb4, Slc17a8, Slc1a2, Sv2a, Slc15a4, Slc36a1
GO:0022027	0.0945977		0.986953	2	9	interkinetic nuclear migration	BP	Tacc1, Cep120
GO:0004823	0.0946891		0.99765	1	2	leucine-tRNA ligase activity	MF	Lars2
GO:0006429	0.0946891		0.99765	1	2	leucyl-tRNA aminoacylation	BP	Lars2
GO:0005280	0.0948162		0.997643	1	2	hydrogen:amino acid symporter activity	MF	Slc36a1
GO:0002161	0.0949412		0.986238	2	12	aminoacyl-tRNA editing activity	MF	Lars2, Dtd1
GO:0086062	0.095272		0.99762	1	2	voltage-gated sodium channel activity involved in Purkinje myocyte action potential	MF	Scn1b
GO:0061146	0.0955911		0.997604	1	2	Peyer's patch morphogenesis	BP	Ret
GO:1904321	0.0956078		0.986259	2	11	response to forskolin	BP	Adcy5, Epha5
GO:1904322	0.0956078		0.986259	2	11	cellular response to forskolin	BP	Adcy5, Epha5
GO:0008038	0.0956652		0.971276	4	32	neuron recognition	BP	Cntn2, Cnr1, Dscam, Epha3
GO:1904062	0.0959686		0.945269	14	211	regulation of cation transmembrane transport	BP	Cacng5, Hap1, Stim1, Glrx, Trdn, Cacnb4, Cacnb3, Dbi, Scn1b, Ank2, Kcnj11, Ppargc1a, Atp7a, Chp1
GO:1905616	0.096071		0.997579	1	2	regulation of miRNA mediated inhibition of translation	BP	Ago2
GO:1905618	0.096071		0.997579	1	2	positive regulation of miRNA mediated inhibition of translation	BP	Ago2
GO:2001169	0.096539		0.98587	2	12	regulation of ATP biosynthetic process	BP	Stat3, Ppargc1a
GO:1905333	0.0965942		0.996754	1	3	regulation of gastric motility	BP	Ghsr
GO:0097369	0.0966244		0.986242	2	10	sodium ion import	BP	Slc9a9, Slc9a6
GO:0015272	0.097175		0.997522	1	2	ATP-activated inward rectifier potassium channel activity	MF	Kcnj11
GO:0097401	0.0972617		0.997517	1	2	synaptic vesicle lumen acidification	BP	Clcn3
GO:0019417	0.0972768		0.997516	1	2	sulfur oxidation	BP	Mical2
GO:0036500	0.097537		0.997503	1	2	ATF6-mediated unfolded protein response	BP	Wfs1
GO:0098749	0.0975541		0.997502	1	2	cerebellar neuron development	BP	Nanos1
GO:0051365	0.0977039		0.997494	1	2	cellular response to potassium ion starvation	BP	Jun
GO:0042998	0.0977301		0.997492	1	2	positive regulation of Golgi to plasma membrane protein transport	BP	Acsl3
GO:0021549	0.097877		0.957664	7	78	cerebellum development	BP	Hap1, Kndc1, Nanos1, Faim2, Zbtb18, Nr2c2, Atp7a
GO:0035729	0.0979901		0.985933	2	10	cellular response to hepatocyte growth factor stimulus	BP	Gsk3b, Adamts12
GO:0021702	0.0983027		0.985862	2	10	cerebellar Purkinje cell differentiation	BP	Faim2, Atp7a
GO:0004096	0.0986131		0.996614	1	3	catalase activity	MF	Cat
GO:0060733	0.0987199		0.99744	1	2	regulation of eIF2 alpha phosphorylation by amino acid starvation	BP	Impact
GO:0071262	0.0987199		0.99744	1	2	regulation of translational initiation in response to starvation	BP	Impact
GO:0071264	0.0987199		0.99744	1	2	positive regulation of translational initiation in response to starvation	BP	Impact
640	0.0988093		0.976114	3	28	Propanoate metabolism	KEGG	Aldh7a1, Aldh3a2, Aldh9a1
GO:0045662	0.0988896		0.985038	2	14	negative regulation of myoblast differentiation	BP	Sostdc1, Mstn
GO:0005342	0.0990354		0.956904	7	86	organic acid transmembrane transporter activity	MF	Slc43a2, Slc16a6, Slc17a8, Slc1a2, Slc15a4, Slc17a6, Slc36a1
GO:0099600	0.0992528		0.933879	25	409	transmembrane receptor activity	MF	Sostdc1, Ghsr, Gpr50, Fzd1, Ly6g6e, Plxnc1, Hrh3, Ptprh, Prokr2, Gabrq, Cntfr, Cnr1, Ret, Lifr, Gabra3, Nrp2, Chrna1, Gabrg2, Kcnj11, Epha3, Gpr85, Epha5, Kcnj16, Tnfrsf21, Ryr1
GO:1904475	0.0994035		0.997403	1	2	regulation of Ras GTPase binding	BP	Ccpg1
GO:2001106	0.0994035		0.997403	1	2	regulation of Rho guanyl-nucleotide exchange factor activity	BP	Ccpg1
GO:0016614	0.0994275		0.959814	6	86	oxidoreductase activity, acting on CH-OH group of donors	MF	Cryl1, Spr, Hadh, Hibadh, Aldh3a2, Kdsr
GO:0097553	0.0997265		0.95658	7	83	calcium ion transmembrane import into cytosol	BP	Hap1, Trdn, Fam155a, Dbi, Ank2, Slc8a3, Ryr1
GO:1901214	0.0999196		0.939293	17	274	regulation of neuron death	BP	Fzd1, Optn, Jun, Wfs1, Cntfr, Stat3, Tgfb3, Faim2, Gsk3b, Sncb, Pak3, Bcl2, Ppargc1a, Gclc, Atp7a, Pcp4, Chp1
GO:0045595	0.10005		0.921906	67	1249	regulation of cell differentiation	BP	Sostdc1, Zhx2, Nefm, Cntn2, Fzd1, Hap1, Plxnc1, Islr2, Jun, Ust, Tcp11, Kndc1, Arsb, Shb, Olfm4, Stat3, Tgfb3, Cnr1, Tbr1, Ret, Nr2e1, Ahi1, Xrcc5, Rbfox1, Grn, Zfp608, Nucb2, H2-DMa, Skil, Trp53inp1, Bcl11a, Zeb2, Rassf2, Dscam, Atp8a2, Gsk3b, Scn1b, Bend6, Map2, Meis2, Pak3, Neurl1a, Sdc2, Tmem178, Inpp5f, Chd5, Bcl2, Rapgef2, Ctnnbip1, Adamts12, Flot2, Trak1, Mapk9, Nr2c2, Epha3, Dock5, Nap1l2…
GO:0002866	0.100207		0.996501	1	3	positive regulation of acute inflammatory response to antigenic stimulus	BP	Cnr1
GO:0050660	0.100293		0.963698	5	58	flavin adenine dinucleotide binding	MF	Aifm3, Gsr, Cyb5r3, Mical2, Sqle
GO:0048469	0.100399		0.953293	8	103	cell maturation	BP	Cntn2, Tcp11, Shb, Ret, Cbfb, Bcl11a, Gsk3b, Bcl2
GO:0110021	0.100596		0.997339	1	2	cardiac muscle myoblast proliferation	BP	Meis2
GO:0110022	0.100596		0.997339	1	2	regulation of cardiac muscle myoblast proliferation	BP	Meis2
GO:0110024	0.100596		0.997339	1	2	positive regulation of cardiac muscle myoblast proliferation	BP	Meis2
GO:0098655	0.100962		0.932579	25	426	cation transmembrane transport	BP	Cacng5, Hap1, Kcnc4, Stim1, Glrx, Slc9a9, Trdn, Cacnb4, Cacnb3, Fam155a, Mcur1, Dbi, Kcna3, Scn1b, Ank2, Kcnk10, Slc9a6, Slc8a3, Micu2, Kcnj11, Ppargc1a, Atp7a, Kcnj16, Chp1, Ryr1
GO:0004601	0.10118		0.983969	2	20	peroxidase activity	MF	Gpx8, Cat
GO:0000179	0.101274		0.996424	1	3	rRNA (adenine-N6,N6-)-dimethyltransferase activity	MF	Tfb2m
GO:0061318	0.101496		0.984896	2	11	renal filtration cell differentiation	BP	Nup93, Ptpro
GO:0072112	0.101496		0.984896	2	11	glomerular visceral epithelial cell differentiation	BP	Nup93, Ptpro
GO:0072311	0.101496		0.984896	2	11	glomerular epithelial cell differentiation	BP	Nup93, Ptpro
GO:0098961	0.101519		0.997289	1	2	dendritic transport of ribonucleoprotein complex	BP	Stau2
GO:0098963	0.101519		0.997289	1	2	dendritic transport of messenger ribonucleoprotein complex	BP	Stau2
GO:0098964	0.101519		0.997289	1	2	anterograde dendritic transport of messenger ribonucleoprotein complex	BP	Stau2
GO:0001921	0.101656		0.984508	2	13	positive regulation of receptor recycling	BP	Inpp5f, Nsf
GO:0003896	0.101696		0.996394	1	3	DNA primase activity	MF	Prim2
GO:0032097	0.101841		0.996383	1	3	positive regulation of response to food	BP	Ghsr
GO:0032100	0.101841		0.996383	1	3	positive regulation of appetite	BP	Ghsr
4920	0.10223		0.962923	5	53	Adipocytokine signaling pathway	KEGG	Stat3, Irs1, Mapk9, Ppargc1a, Acsl3
GO:0072300	0.102527		0.997233	1	2	positive regulation of metanephric glomerulus development	BP	Ret
GO:0015293	0.102657		0.954976	7	84	symporter activity	MF	Slc4a8, Slc16a6, Slc17a8, Slc1a2, Slc15a4, Slc17a6, Slc36a1
GO:0035844	0.102882		0.997213	1	2	cloaca development	BP	Ahi1
GO:0009713	0.102916		0.984203	2	13	catechol-containing compound biosynthetic process	BP	Gch1, Atp7a
GO:0042423	0.102916		0.984203	2	13	catecholamine biosynthetic process	BP	Gch1, Atp7a
GO:2000402	0.102959		0.997209	1	2	negative regulation of lymphocyte migration	BP	Lrch1
GO:1902728	0.103016		0.997206	1	2	positive regulation of growth factor dependent skeletal muscle satellite cell proliferation	BP	Stat3
GO:0050852	0.10302		0.962492	5	55	T cell receptor signaling pathway	BP	Themis, Shb, Cacnb4, Cacnb3, Tnfrsf21
GO:0008090	0.103062		0.984762	2	10	retrograde axonal transport	BP	Hap1, Dst
GO:0051542	0.103104		0.997201	1	2	elastin biosynthetic process	BP	Atp7a
GO:0061582	0.103162		0.997198	1	2	intestinal epithelial cell migration	BP	Arsb
GO:0042438	0.103509		0.984223	2	12	melanin biosynthetic process	BP	Zeb2, Rapgef2
GO:0044550	0.103509		0.984223	2	12	secondary metabolite biosynthetic process	BP	Zeb2, Rapgef2
GO:0000302	0.10354		0.946698	10	149	response to reactive oxygen species	BP	Gch1, Jun, Glrx, Nup93, Bcl2, Aldh3a2, Cat, Mapk9, Atp7a, Impact
GO:0016248	0.103939		0.974455	3	26	channel inhibitor activity	MF	Wnk1, Scn1b, Bcl2
GO:0015297	0.104024		0.962075	5	53	antiporter activity	MF	Slc4a8, Slc9a9, Clcn3, Slc9a6, Slc8a3
GO:0004105	0.104141		0.997143	1	2	choline-phosphate cytidylyltransferase activity	MF	Pcyt1b
GO:1903905	0.104188		0.99714	1	2	positive regulation of establishment of T cell polarity	BP	Flot2
GO:0042536	0.104499		0.996187	1	3	negative regulation of tumor necrosis factor biosynthetic process	BP	Ghsr
GO:0060168	0.104684		0.997112	1	2	positive regulation of adenosine receptor signaling pathway	BP	Cntn2
GO:0050908	0.104767		0.984118	2	11	detection of light stimulus involved in visual perception	BP	Cacnb4, Atp8a2
GO:0050962	0.104767		0.984118	2	11	detection of light stimulus involved in sensory perception	BP	Cacnb4, Atp8a2
GO:0033141	0.104899		0.9971	1	2	positive regulation of peptidyl-serine phosphorylation of STAT protein	BP	Ret
GO:0046324	0.105143		0.961544	5	53	regulation of glucose import	BP	Rhoq, Osbpl8, Ahi1, Slc1a2, Irs1
GO:1903727	0.105244		0.973996	3	26	positive regulation of phospholipid metabolic process	BP	Vav2, Irs1, Acsl3
GO:1901509	0.105348		0.997074	1	2	regulation of endothelial tube morphogenesis	BP	Adamts12
GO:1903860	0.105414		0.99707	1	2	negative regulation of dendrite extension	BP	Bcl11a
GO:0016532	0.105575		0.996106	1	3	superoxide dismutase copper chaperone activity	MF	Atp7a
GO:0033292	0.105646		0.997057	1	2	T-tubule organization	BP	Ank2
GO:0051342	0.10573		0.996094	1	3	regulation of cyclic-nucleotide phosphodiesterase activity	BP	Aip
GO:2000670	0.105791		0.997049	1	2	positive regulation of dendritic cell apoptotic process	BP	Rapgef2
GO:1904339	0.105967		0.997039	1	2	negative regulation of dopaminergic neuron differentiation	BP	Gsk3b
GO:0097156	0.106107		0.997031	1	2	fasciculation of motor neuron axon	BP	Epha3
GO:0016709	0.106196		0.983398	2	13	oxidoreductase activity, acting on paired donors, with incorporation or reduction of molecular oxygen, NAD(P)H as one donor, and incorporation of one atom of oxygen	MF	Mical2, Sqle
GO:0006825	0.106245		0.983386	2	13	copper ion transport	BP	Mmgt1, Atp7a
GO:0015844	0.106389		0.960755	5	60	monoamine transport	BP	Ghsr, Hrh3, Cnr1, Cadps, Pcp4
GO:0038110	0.106569		0.997004	1	2	interleukin-2-mediated signaling pathway	BP	Jak1
GO:0071352	0.106569		0.997004	1	2	cellular response to interleukin-2	BP	Jak1
GO:0042379	0.106618		0.983147	2	14	chemokine receptor binding	MF	Stat3, Jak1
GO:1990189	0.106842		0.996009	1	3	peptide-serine-N-acetyltransferase activity	MF	Naa11
GO:0061141	0.106978		0.99698	1	2	lung ciliated cell differentiation	BP	Nfib
GO:0001657	0.107296		0.956083	6	68	ureteric bud development	BP	Ret, Bcl2, Ctnnbip1, Cat, Pbx1, Kif26b
GO:0072163	0.107296		0.956083	6	68	mesonephric epithelium development	BP	Ret, Bcl2, Ctnnbip1, Cat, Pbx1, Kif26b
GO:0072164	0.107296		0.956083	6	68	mesonephric tubule development	BP	Ret, Bcl2, Ctnnbip1, Cat, Pbx1, Kif26b
GO:0015036	0.107572		0.972728	3	34	disulfide oxidoreductase activity	MF	Glrx, Nxn, Gsr
GO:0003011	0.107854		0.995931	1	3	involuntary skeletal muscle contraction	BP	Atp8a2
GO:0005245	0.108233		0.965877	4	35	voltage-gated calcium channel activity	MF	Cacng5, Cacnb4, Cacnb3, Ryr1
GO:0070094	0.108405		0.996897	1	2	positive regulation of glucagon secretion	BP	Irs1
GO:0008514	0.108441		0.946044	9	121	organic anion transmembrane transporter activity	MF	Slc43a2, Slc4a8, Slc16a6, Slco5a1, Slc17a8, Slc1a2, Slc15a4, Slc17a6, Slc36a1
GO:0021697	0.108498		0.97309	3	23	cerebellar cortex formation	BP	Kndc1, Faim2, Atp7a
GO:0006516	0.108564		0.982807	2	13	glycoprotein catabolic process	BP	Fbxo2, Adamts12
GO:0061333	0.108698		0.959878	5	52	renal tubule morphogenesis	BP	Ahi1, Bcl2, Ctnnbip1, Pbx1, Kif26b
GO:0035082	0.108783		0.965224	4	44	axoneme assembly	BP	Dnah5, Zmynd10, Neurl1a, Ttll5
GO:0006323	0.108842		0.948167	8	130	DNA packaging	BP	Nap1l5, Hist1h1a, Smyd3, Anp32e, Chd5, Tspyl4, Hist2h2bb, Nap1l2
GO:0007275	0.108875		0.907901	170	3387	multicellular organism development	BP	Sostdc1, Themis, Ghsr, Peg10, Rspo3, Nyap2, Zhx2, Nefm, Nrn1, Pcdh17, Pcdh8, Txnip, Cntn2, Fzd1, Hap1, Spr, Hdac11, Plxnc1, Arrdc3, Slc4a8, Vav2, Coprs, Stim1, Islr2, Jun, Ust, Hipk1, Tead1, Nxn, Kirrel3, Myo3b, Nfib, Tcp11, Lama2, Pcdhb1, Kndc1, Morc1, Wfs1, Cenpf, Arsb, Shb, Dock11, Trappc9, Cntfr, Ank1, Tacc1, Nup93, Stat3, Lgi1, Scel, Myt1l, Tgfb3, Nanos1, Creb5, Cnr1, Tbr1, Ret, Cacnb4, Nr2e…
GO:0071549	0.109013		0.982694	2	13	cellular response to dexamethasone stimulus	BP	Smyd3, Mstn
GO:0032696	0.109379		0.995812	1	3	negative regulation of interleukin-13 production	BP	Tnfrsf21
GO:0004616	0.109745		0.995784	1	3	phosphogluconate dehydrogenase (decarboxylating) activity	MF	Hibadh
GO:0016486	0.109788		0.982499	2	13	peptide hormone processing	BP	Atp6ap2, Cpe
GO:0005242	0.110006		0.982443	2	13	inward rectifier potassium channel activity	MF	Kcnj11, Kcnj16
GO:0010273	0.110043		0.995246	1	4	detoxification of copper ion	BP	Atp7a
GO:1990169	0.110043		0.995246	1	4	stress response to copper ion	BP	Atp7a
GO:0050850	0.110068		0.972202	3	27	positive regulation of calcium-mediated signaling	BP	Hap1, Lmcd1, Trdn
GO:0019430	0.110133		0.982411	2	13	removal of superoxide radicals	BP	Gch1, Atp7a
GO:0042270	0.110167		0.99575	1	3	protection from natural killer cell mediated cytotoxicity	BP	Tap1
GO:0033604	0.110217		0.98239	2	13	negative regulation of catecholamine secretion	BP	Ghsr, Cnr1
GO:1903169	0.11039		0.950626	7	90	regulation of calcium ion transmembrane transport	BP	Hap1, Stim1, Trdn, Cacnb4, Cacnb3, Dbi, Ank2
GO:0004872	0.110842		0.921579	32	547	receptor activity	MF	Sostdc1, Ghsr, Gpr50, Fzd1, Ly6g6e, Plxnc1, Hrh3, Ptprh, Prokr2, Gabrq, Cntfr, Cnr1, Ret, Cadm2, Nr2e1, Lifr, Gabra3, Nrp2, Sv2a, Chrna1, Atp6ap2, Gabrg2, Kcnj11, Nr2c2, Epha3, Gpr85, Lrp10, Epha5, Kcnj16, Unc13c, Tnfrsf21, Ryr1
GO:0098771	0.110975		0.924484	26	448	inorganic ion homeostasis	BP	Hap1, Slc4a8, Stim1, Hrh3, Slc9a9, Wfs1, Trdn, Ank1, Cacnb4, Clcn3, Cacnb3, Fam155a, Nucb2, Mcur1, Dbi, Sv2a, Adcy5, Ank2, Slc9a6, Tmem178, Slc8a3, Micu2, Bcl2, Atp7a, Chp1, Ryr1
GO:0006166	0.111238		0.995139	1	4	purine ribonucleoside salvage	BP	Hprt
GO:0032767	0.111715		0.995627	1	3	copper-dependent protein binding	MF	Atp7a
GO:0034446	0.11174		0.95374	6	69	substrate adhesion-dependent cell spreading	BP	Olfm4, Parva, Fermt2, Radil, Dock5, Postn
GO:0007029	0.111956		0.964014	4	40	endoplasmic reticulum organization	BP	Trdn, Stx18, Atl3, Rtn3
GO:0007167	0.112174		0.919304	35	604	enzyme linked receptor protein signaling pathway	BP	Sostdc1, Ghsr, Peg10, Rhoq, Osbpl8, Txnip, Fzd1, Sla, Hap1, Jun, Glrx, Plat, Nup93, Stat3, Tgfb3, Ret, Flrt1, Lifr, Ahi1, Nrp2, Nucb2, Skil, Fermt2, Rassf2, Gsk3b, Neurl1a, Slc9a6, Irs1, Rapgef2, Adamts12, Meg3, Epha3, Epha5, Mstn, Jak1
GO:0021694	0.112219		0.982287	2	11	cerebellar Purkinje cell layer formation	BP	Faim2, Atp7a
GO:0004923	0.112321		0.996661	1	2	leukemia inhibitory factor receptor activity	MF	Lifr
GO:0004924	0.112321		0.996661	1	2	oncostatin-M receptor activity	MF	Lifr
GO:0038165	0.112321		0.996661	1	2	oncostatin-M-mediated signaling pathway	BP	Lifr
5145	0.112384		0.949584	7	86	Toxoplasmosis	KEGG	Lama2, Stat3, Tgfb3, H2-DMa, Bcl2, Mapk9, Jak1
GO:0004118	0.112397		0.996657	1	2	cGMP-stimulated cyclic-nucleotide phosphodiesterase activity	MF	Pde10a
GO:0045980	0.113171		0.963354	4	43	negative regulation of nucleotide metabolic process	BP	Hrh3, Stat3, Nucb2, Ppargc1a
GO:1900543	0.113171		0.963354	4	43	negative regulation of purine nucleotide metabolic process	BP	Hrh3, Stat3, Nucb2, Ppargc1a
GO:0022821	0.113644		0.981702	2	12	potassium ion antiporter activity	MF	Slc9a9, Slc9a6
GO:0048741	0.113702		0.970954	3	26	skeletal muscle fiber development	BP	Rcan1, Bcl2, Ryr1
GO:0042590	0.113713		0.994915	1	4	antigen processing and presentation of exogenous peptide antigen via MHC class I	BP	Tapbp
GO:0001823	0.113831		0.952639	6	69	mesonephros development	BP	Ret, Bcl2, Ctnnbip1, Cat, Pbx1, Kif26b
GO:0060089	0.113889		0.918346	34	589	molecular transducer activity	MF	Sostdc1, Ghsr, Gpr50, Fzd1, Ly6g6e, Plxnc1, Hrh3, Ptprh, Prokr2, Gabrq, Cntfr, Cnr1, Cdk18, Ret, Cadm2, Nr2e1, Lifr, Gabra3, Nrp2, Cdkl2, Sv2a, Chrna1, Atp6ap2, Gabrg2, Kcnj11, Nr2c2, Epha3, Gpr85, Lrp10, Epha5, Kcnj16, Unc13c, Tnfrsf21, Ryr1
GO:0033173	0.11392		0.971046	3	24	calcineurin-NFAT signaling cascade	BP	Lmcd1, Rcan1, Chp1
GO:0097720	0.11392		0.971046	3	24	calcineurin-mediated signaling	BP	Lmcd1, Rcan1, Chp1
GO:2000479	0.114027		0.981604	2	12	regulation of cAMP-dependent protein kinase activity	BP	Pkia, Rapgef2
GO:0006875	0.114203		0.926365	20	334	cellular metal ion homeostasis	BP	Hap1, Stim1, Hrh3, Wfs1, Trdn, Cacnb4, Cacnb3, Fam155a, Nucb2, Mcur1, Dbi, Sv2a, Adcy5, Ank2, Tmem178, Slc8a3, Micu2, Bcl2, Atp7a, Ryr1
GO:0021681	0.114301		0.981533	2	12	cerebellar granular layer development	BP	Kndc1, Faim2
GO:0060279	0.114429		0.995406	1	3	positive regulation of ovulation	BP	Plat
GO:0002317	0.114698		0.994824	1	4	plasma cell differentiation	BP	Lgals8
GO:0015078	0.11482		0.962044	4	65	hydrogen ion transmembrane transporter activity	MF	Slc9a9, Slc9a6, Atp6v1g2, Slc36a1
GO:0015485	0.114852		0.970319	3	29	cholesterol binding	MF	Osbpl8, Npc2, Osbpl2
GO:1904349	0.115259		0.995337	1	3	positive regulation of small intestine smooth muscle contraction	BP	Ghsr
GO:0072010	0.115616		0.981194	2	12	glomerular epithelium development	BP	Nup93, Ptpro
GO:0031394	0.11579		0.995293	1	3	positive regulation of prostaglandin biosynthetic process	BP	Mapk9
GO:2001280	0.11579		0.995293	1	3	positive regulation of unsaturated fatty acid biosynthetic process	BP	Mapk9
GO:0005021	0.115905		0.996438	1	2	vascular endothelial growth factor-activated receptor activity	MF	Nrp2
GO:0021649	0.115905		0.996438	1	2	vestibulocochlear nerve structural organization	BP	Nrp2
GO:0061552	0.115905		0.996438	1	2	ganglion morphogenesis	BP	Nrp2
GO:0097374	0.115905		0.996438	1	2	sensory neuron axon guidance	BP	Nrp2
GO:1904835	0.115905		0.996438	1	2	dorsal root ganglion morphogenesis	BP	Nrp2
GO:1902548	0.116056		0.996428	1	2	negative regulation of cellular response to vascular endothelial growth factor stimulus	BP	Adamts12
GO:0006633	0.116057		0.951227	6	80	fatty acid biosynthetic process	BP	Elovl2, Acot7, Elovl4, Mapk9, Acsl3, Elovl6
GO:0002040	0.116353		0.956022	5	56	sprouting angiogenesis	BP	Ghsr, Rspo3, Nr2e1, Parva, Jak1
GO:0043001	0.11643		0.9698	3	28	Golgi to plasma membrane protein transport	BP	Optn, Acsl3, Gopc
GO:0048753	0.116532		0.980957	2	12	pigment granule organization	BP	Zeb2, Bcl2
GO:0035725	0.116556		0.951147	6	71	sodium ion transmembrane transport	BP	Glrx, Slc9a9, Scn1b, Slc9a6, Slc8a3, Chp1
GO:0004008	0.11664		0.996391	1	2	copper-exporting ATPase activity	MF	Atp7a
GO:0043682	0.11664		0.996391	1	2	copper-transporting ATPase activity	MF	Atp7a
GO:0060003	0.11664		0.996391	1	2	copper ion export	BP	Atp7a
GO:0050796	0.116874		0.940892	9	125	regulation of insulin secretion	BP	Ghsr, Glrx, Cnr1, Ndufaf2, Hadh, Adcy5, Irs1, Kcnj11, Epha5
GO:0009111	0.116951		0.994613	1	4	vitamin catabolic process	BP	Pdxp
GO:0006801	0.117103		0.969482	3	29	superoxide metabolic process	BP	Gch1, Sh3pxd2a, Atp7a
GO:0007519	0.117123		0.940761	9	123	skeletal muscle tissue development	BP	Zbtb18, Rbfox1, Skil, Chrna1, Rcan1, Bcl2, Meg3, Mstn, Ryr1
GO:0006814	0.117159		0.938335	10	137	sodium ion transport	BP	Slc4a8, Glrx, Slc9a9, Slc17a8, Wnk1, Scn1b, Slc9a6, Slc8a3, Slc17a6, Chp1
GO:0019748	0.117193		0.969386	3	30	secondary metabolic process	BP	Zeb2, Bcl2, Rapgef2
GO:0090204	0.117202		0.995174	1	3	protein localization to nuclear pore	BP	Osbpl8
GO:0002474	0.117545		0.979842	2	18	antigen processing and presentation of peptide antigen via MHC class I	BP	Tap1, Tapbp
GO:0035609	0.117707		0.995131	1	3	C-terminal protein deglutamylation	BP	Agbl4
GO:1900186	0.117938		0.995111	1	3	negative regulation of clathrin-dependent endocytosis	BP	Ubqln2
GO:0031000	0.117944		0.981476	2	9	response to caffeine	BP	Irs1, Ryr1
GO:0071474	0.118253		0.994489	1	4	cellular hyperosmotic response	BP	Xrcc5
GO:0004969	0.118297		0.995081	1	3	histamine receptor activity	MF	Hrh3
GO:0050996	0.118367		0.980105	2	14	positive regulation of lipid catabolic process	BP	Abhd5, Irs1
GO:0071442	0.118384		0.995073	1	3	positive regulation of histone H3-K14 acetylation	BP	Nap1l2
GO:0008889	0.118613		0.995053	1	3	glycerophosphodiester phosphodiesterase activity	MF	Gde1
GO:0002360	0.118801		0.980605	2	11	T cell lineage commitment	BP	Stat3, Bcl2
GO:0030033	0.118805		0.980362	2	12	microvillus assembly	BP	Rapgef6, Rapgef2
GO:0042816	0.118989		0.995021	1	3	vitamin B6 metabolic process	BP	Pdxp
GO:0042822	0.118989		0.995021	1	3	pyridoxal phosphate metabolic process	BP	Pdxp
GO:0060164	0.11918		0.995005	1	3	regulation of timing of neuron differentiation	BP	Nr2e1
GO:0009062	0.119449		0.954263	5	64	fatty acid catabolic process	BP	Cnr1, Hadh, Acot7, Dbi, Irs1
GO:0060042	0.11947		0.960811	4	38	retina morphogenesis in camera-type eye	BP	Hipk1, Ahi1, Dscam, Atp8a2
GO:0030674	0.119752		0.945332	7	92	protein binding, bridging	MF	Sla, Optn, Shb, Ank1, Tchh, Ank2, Irs1
GO:0009446	0.120138		0.994922	1	3	putrescine biosynthetic process	BP	Odc1
4940	0.120158		0.979227	2	17	Type I diabetes mellitus	KEGG	H2-DMa, Cpe
GO:2001273	0.120286		0.979971	2	12	regulation of glucose import in response to insulin stimulus	BP	Osbpl8, Irs1
GO:0007289	0.120424		0.979728	2	13	spermatid nucleus differentiation	BP	Chd5, Gopc
GO:0042180	0.120536		0.941377	8	120	cellular ketone metabolic process	BP	Ghsr, Cnr1, Nucb2, Dbi, Irs1, Kdsr, Mapk9, Ppargc1a
GO:0046098	0.120724		0.994871	1	3	guanine metabolic process	BP	Hprt
GO:0015711	0.120794		0.927091	15	238	organic anion transport	BP	Osbpl8, Slc43a2, Hrh3, Slc16a6, Cacnb4, Slco5a1, Slc17a8, Slc1a2, Sv2a, Atp8a2, Slc15a4, Mapk9, Acsl3, Slc36a1, Atp11c
GO:0032417	0.120822		0.994862	1	3	positive regulation of sodium:proton antiporter activity	BP	Chp1
GO:0032934	0.121574		0.967731	3	30	sterol binding	MF	Osbpl8, Npc2, Osbpl2
GO:0007413	0.121706		0.968385	3	22	axonal fasciculation	BP	Cntn2, Cnr1, Epha3
GO:0106030	0.121706		0.968385	3	22	neuron projection fasciculation	BP	Cntn2, Cnr1, Epha3
GO:2000790	0.121735		0.996058	1	2	regulation of mesenchymal cell proliferation involved in lung development	BP	Nfib
GO:2000791	0.121735		0.996058	1	2	negative regulation of mesenchymal cell proliferation involved in lung development	BP	Nfib
GO:0060486	0.121792		0.996054	1	2	Clara cell differentiation	BP	Nfib
GO:0002293	0.122057		0.96776	3	27	alpha-beta T cell differentiation involved in immune response	BP	Shb, Stat3, Atp7a
GO:0002294	0.122057		0.96776	3	27	CD4-positive, alpha-beta T cell differentiation involved in immune response	BP	Shb, Stat3, Atp7a
GO:0042093	0.122057		0.96776	3	27	T-helper cell differentiation	BP	Shb, Stat3, Atp7a
GO:0097324	0.122191		0.996027	1	2	melanocyte migration	BP	Zeb2
GO:0060023	0.122208		0.996026	1	2	soft palate development	BP	Tshz1
GO:0051969	0.122307		0.978886	2	15	regulation of transmission of nerve impulse	BP	Ghsr, Kcnc4
GO:0034334	0.122551		0.994709	1	3	adherens junction maintenance	BP	Rassf8
GO:0009240	0.122921		0.994033	1	4	isopentenyl diphosphate biosynthetic process	BP	Mvk
GO:0046490	0.122921		0.994033	1	4	isopentenyl diphosphate metabolic process	BP	Mvk
GO:0070593	0.122991		0.995973	1	2	dendrite self-avoidance	BP	Dscam
GO:0005164	0.12304		0.978684	2	15	tumor necrosis factor receptor binding	MF	Nucb2, Traf3
GO:0033693	0.12314		0.994657	1	3	neurofilament bundle assembly	BP	Nefm
GO:0032768	0.123214		0.967243	3	28	regulation of monooxygenase activity	BP	Gch1, Cnr1, Gsk3b
620	0.123218		0.966982	3	32	Pyruvate metabolism	KEGG	Aldh7a1, Aldh3a2, Aldh9a1
GO:0030183	0.123284		0.947535	6	71	B cell differentiation	BP	Dock11, Lgals8, Bcl11a, Bcl2, Sp3, Atp11c
GO:0001565	0.123294		0.995953	1	2	phorbol ester receptor activity	MF	Unc13c
GO:0001566	0.123294		0.995953	1	2	non-kinase phorbol ester receptor activity	MF	Unc13c
GO:1904071	0.123338		0.99595	1	2	presynaptic active zone assembly	BP	Pcdh17
GO:0043486	0.123382		0.97859	2	15	histone exchange	BP	Anp32e, Chd5
GO:0015800	0.123517		0.978892	2	13	acidic amino acid transport	BP	Slc17a8, Slc1a2
GO:0021955	0.123604		0.95915	4	35	central nervous system neuron axonogenesis	BP	Nfib, Nr2e1, Zeb2, Scn1b
GO:0048730	0.123733		0.967207	3	26	epidermis morphogenesis	BP	Sostdc1, Bcl2, Atp7a
GO:0034311	0.123863		0.97832	2	16	diol metabolic process	BP	Gch1, Spr
GO:0016434	0.124032		0.994577	1	3	rRNA (cytosine) methyltransferase activity	MF	Mettl15
GO:0003151	0.124041		0.952335	5	52	outflow tract morphogenesis	BP	Fzd1, Jun, Nrp2, Parva, Ryr1
GO:0014911	0.124407		0.958487	4	40	positive regulation of smooth muscle cell migration	BP	Bcl2, Dock5, Atp7a, Postn
GO:0030004	0.124564		0.946745	6	75	cellular monovalent inorganic cation homeostasis	BP	Slc4a8, Slc9a9, Clcn3, Slc9a6, Bcl2, Chp1
GO:0019136	0.124595		0.993864	1	4	deoxynucleoside kinase activity	MF	Dck
GO:0006391	0.124699		0.994517	1	3	transcription initiation from mitochondrial promoter	BP	Tfb2m
GO:0051384	0.124726		0.958152	4	44	response to glucocorticoid	BP	Cdo1, Smyd3, Bcl2, Mstn
GO:0030860	0.124858		0.994502	1	3	regulation of polarized epithelial cell differentiation	BP	Ahi1
GO:0015087	0.124984		0.994491	1	3	cobalt ion transmembrane transporter activity	MF	Mmgt1
GO:0050851	0.125042		0.946485	6	75	antigen receptor-mediated signaling pathway	BP	Themis, Shb, Cacnb4, Cacnb3, Bcl2, Tnfrsf21
GO:1904430	0.125326		0.99446	1	3	negative regulation of t-circle formation	BP	Xrcc5
GO:0046668	0.125381		0.994455	1	3	regulation of retinal cell programmed cell death	BP	Bcl2
GO:0035936	0.125546		0.99444	1	3	testosterone secretion	BP	Nucb2
GO:2000843	0.125546		0.99444	1	3	regulation of testosterone secretion	BP	Nucb2
GO:0097479	0.125567		0.935519	9	126	synaptic vesicle localization	BP	Pcdh17, Ap3m2, Grn, Syt13, Cadps, Dnajc6, Prepl, Unc13c, Cplx2
GO:0010936	0.125665		0.994429	1	3	negative regulation of macrophage cytokine production	BP	Tgfb3
GO:0071276	0.125677		0.977952	2	15	cellular response to cadmium ion	BP	Jun, Mapk9
GO:0016531	0.12619		0.993297	1	5	copper chaperone activity	MF	Atp7a
GO:0034762	0.126263		0.918495	19	312	regulation of transmembrane transport	BP	Cacng5, Hap1, Kcnc4, Stim1, Glrx, Trdn, Cacnb4, Cacnb3, Dbi, Kcna3, Scn1b, Ank2, Bcl2, Kcnj11, Ppargc1a, Atp7a, Kcnj16, Gopc, Chp1
GO:0072526	0.126287		0.993692	1	4	pyridine-containing compound catabolic process	BP	Pdxp
GO:0030158	0.126612		0.994342	1	3	protein xylosyltransferase activity	MF	Poglut1
GO:0048743	0.127027		0.994303	1	3	positive regulation of skeletal muscle fiber development	BP	Bcl2
GO:0001602	0.127104		0.994296	1	3	pancreatic polypeptide receptor activity	MF	Prokr2
GO:1900181	0.127141		0.950587	5	57	negative regulation of protein localization to nucleus	BP	Fzd1, Dclk3, Pkia, Gsk3b, Chp1
GO:1901317	0.127773		0.994234	1	3	regulation of flagellated sperm motility	BP	Anxa5
GO:0005539	0.127797		0.937187	8	107	glycosaminoglycan binding	MF	Adamts8, Rspo3, Hist1h1a, Nrp2, Habp4, Layn, Mstn, Postn
GO:0044273	0.127943		0.977172	2	16	sulfur compound catabolic process	BP	Cdo1, Acot7
GO:0051970	0.128088		0.994205	1	3	negative regulation of transmission of nerve impulse	BP	Kcnc4
GO:0002287	0.128315		0.965276	3	28	alpha-beta T cell activation involved in immune response	BP	Shb, Stat3, Atp7a
GO:0051179	0.128686		0.889646	194	4082	localization	BP	Cacng5, Ghsr, Rhoq, Nefm, Pcdh17, Osbpl8, Txnip, Cntn2, Fzd1, Sla, Hap1, Nipal3, Rassf5, Dclk3, Slc43a2, Rab3d, Ap3m2, Kcnc4, Ccdc91, Hist1h1a, Slc4a8, Vav2, Stim1, Optn, Tap1, Hrh3, Jun, Glrx, Plat, Gabrq, Kirrel3, Slc9a9, Lama2, Trpm3, Pitpnm3, Wfs1, Trdn, Cenpf, Arsb, Stam2, Vamp1, Ank1, Tacc1, Nup93, Arl4c, Stat3, Tmem184c, Nacc2, Tgfb3, Nanos1, Cnr1, Mmgt1, Wipi1, Aifm3, Tbr1, Ret, Dynll2, I…
GO:1904000	0.128791		0.994139	1	3	positive regulation of eating behavior	BP	Ghsr
GO:0014732	0.128864		0.994132	1	3	skeletal muscle atrophy	BP	Mstn
GO:0002863	0.12934		0.993374	1	4	positive regulation of inflammatory response to antigenic stimulus	BP	Cnr1
GO:0048520	0.129835		0.976778	2	15	positive regulation of behavior	BP	Ghsr, Nr2c2
GO:0018125	0.13031		0.993995	1	3	peptidyl-cysteine methylation	BP	Rab3d
GO:0002313	0.130413		0.976783	2	14	mature B cell differentiation involved in immune response	BP	Dock11, Lgals8
GO:0008597	0.130686		0.99396	1	3	calcium-dependent protein serine/threonine phosphatase regulator activity	MF	Rcan1
GO:0099516	0.130871		0.955475	4	41	ion antiporter activity	MF	Slc4a8, Slc9a9, Slc9a6, Slc8a3
GO:1903672	0.131015		0.976612	2	14	positive regulation of sprouting angiogenesis	BP	Ghsr, Jak1
GO:0001755	0.131116		0.964354	3	26	neural crest cell migration	BP	Ret, Nrp2, Zeb2
4630	0.131193		0.943134	6	74	Jak-STAT signaling pathway	KEGG	Stam2, Cntfr, Stat3, Lifr, Spred2, Jak1
GO:0004714	0.131327		0.955501	4	37	transmembrane receptor protein tyrosine kinase activity	MF	Ret, Nrp2, Epha3, Epha5
GO:1900151	0.131336		0.97672	2	13	regulation of nuclear-transcribed mRNA catabolic process, deadenylation-dependent decay	BP	Nanos1, Ago2
GO:1900153	0.131336		0.97672	2	13	positive regulation of nuclear-transcribed mRNA catabolic process, deadenylation-dependent decay	BP	Nanos1, Ago2
GO:0035728	0.13155		0.976895	2	12	response to hepatocyte growth factor	BP	Gsk3b, Adamts12
GO:0051341	0.131594		0.954904	4	46	regulation of oxidoreductase activity	BP	Gch1, Cnr1, Gsk3b, Atp7a
GO:1902855	0.131658		0.976629	2	13	regulation of non-motile cilium assembly	BP	Hap1, Cep135
GO:0060167	0.131662		0.993866	1	3	regulation of adenosine receptor signaling pathway	BP	Cntn2
GO:0060648	0.131772		0.993856	1	3	mammary gland bud morphogenesis	BP	Sostdc1
GO:0002922	0.131896		0.993101	1	4	positive regulation of humoral immune response	BP	H2-DMa
GO:0015808	0.131901		0.993843	1	3	L-alanine transport	BP	Slc36a1
GO:0045332	0.131981		0.977057	2	11	phospholipid translocation	BP	Atp8a2, Atp11c
GO:0071879	0.132008		0.993833	1	3	positive regulation of adrenergic receptor signaling pathway	BP	Arrdc3
GO:0039019	0.132041		0.99383	1	3	pronephric nephron development	BP	Ahi1
GO:0050508	0.132276		0.993807	1	3	glucuronosyl-N-acetylglucosaminyl-proteoglycan 4-alpha-N-acetylglucosaminyltransferase activity	MF	Extl1
GO:0010730	0.132366		0.993798	1	3	negative regulation of hydrogen peroxide biosynthetic process	BP	Stat3
GO:0004888	0.132645		0.910114	23	385	transmembrane signaling receptor activity	MF	Sostdc1, Ghsr, Gpr50, Fzd1, Ly6g6e, Plxnc1, Hrh3, Ptprh, Prokr2, Gabrq, Cntfr, Cnr1, Ret, Lifr, Gabra3, Nrp2, Chrna1, Gabrg2, Epha3, Gpr85, Epha5, Tnfrsf21, Ryr1
GO:0030070	0.132689		0.993767	1	3	insulin processing	BP	Cpe
GO:0023052	0.132732		0.886554	173	3525	signaling	BP	Sostdc1, Cacng5, Themis, Ghsr, Gpr50, Peg10, Rhoq, Rgs13, Rspo3, Nyap2, Pcdh17, Osbpl8, Pcdh8, Txnip, Cntn2, Fzd1, Sla, Ly6g6e, Hap1, Rassf5, Dclk3, Plxnc1, Kcnc4, Arrdc3, Vav2, Optn, Fbxo9, Tspan9, Hrh3, Jun, Sipa1l2, Glrx, Hipk1, Prokr2, Dusp16, Tead1, Plat, Gabrq, Nxn, Lmcd1, Tcp11, Lama2, Pcdhb1, Stk32b, Ppp2r1b, Kndc1, Wfs1, Trdn, Shb, Dock11, Cntfr, Ank1, Rgs5, Nup93, Olfm4, Arl4c, Stat3, L…
GO:0005126	0.132787		0.933982	8	120	cytokine receptor binding	MF	Stat3, Tgfb3, Lifr, Nucb2, Spred2, Mstn, Jak1, Traf3
GO:0035482	0.133402		0.992938	1	4	gastric motility	BP	Ghsr
GO:0048662	0.13363		0.963105	3	29	negative regulation of smooth muscle cell proliferation	BP	Tgfb3, Ctnnbip1, Ppargc1a
GO:0050804	0.133703		0.913037	19	305	modulation of chemical synaptic transmission	BP	Pcdh17, Cntn2, Hap1, Kcnc4, Lama2, Lgi1, Cnr1, Nr2e1, Dbi, Gsk3b, Prepl, Neurl1a, Slc8a3, Rapgef2, Igsf9b, Unc13c, Stau2, Mpp2, Cplx2
GO:0015631	0.133765		0.91656	16	255	tubulin binding	MF	Rad51d, Eml2, Stim1, Arl4c, Agbl4, Cep350, Dst, Sncb, Map2, Jakmip3, Ska2, Kif21a, Ppargc1a, Kif26b, Cnn3, Chp1
GO:0002002	0.133894		0.993649	1	3	regulation of angiotensin levels in blood	BP	Atp6ap2
GO:2001241	0.133925		0.975599	2	15	positive regulation of extrinsic apoptotic signaling pathway in absence of ligand	BP	Ppp2r1b, Ret
GO:0055102	0.13401		0.992414	1	5	lipase inhibitor activity	MF	Anxa3
GO:0045597	0.134114		0.899786	40	724	positive regulation of cell differentiation	BP	Fzd1, Hap1, Plxnc1, Islr2, Jun, Arsb, Shb, Olfm4, Stat3, Tgfb3, Cnr1, Ret, Ahi1, Xrcc5, Grn, H2-DMa, Skil, Bcl11a, Zeb2, Dscam, Atp8a2, Gsk3b, Scn1b, Bend6, Pak3, Neurl1a, Bcl2, Rapgef2, Ctnnbip1, Trak1, Mapk9, Nr2c2, Epha3, Dock5, Nap1l2, Impact, Pcp4, Stau2, Atp11c, Ccdc3
GO:0070300	0.134152		0.975711	2	14	phosphatidic acid binding	MF	Rapgef6, Rapgef2
GO:0031960	0.134364		0.953652	4	45	response to corticosteroid	BP	Cdo1, Smyd3, Bcl2, Mstn
GO:0015718	0.13466		0.941071	6	80	monocarboxylic acid transport	BP	Hrh3, Slc16a6, Cacnb4, Sv2a, Mapk9, Acsl3
GO:0015276	0.134731		0.93675	7	88	ligand-gated ion channel activity	MF	Gabrq, Gabra3, Chrna1, Gabrg2, Kcnj11, Kcnj16, Ryr1
GO:0022834	0.134731		0.93675	7	88	ligand-gated channel activity	MF	Gabrq, Gabra3, Chrna1, Gabrg2, Kcnj11, Kcnj16, Ryr1
GO:0005173	0.135172		0.993524	1	3	stem cell factor receptor binding	MF	Spred2
GO:0016684	0.135189		0.974372	2	23	oxidoreductase activity, acting on peroxide as acceptor	MF	Gpx8, Cat
GO:0048016	0.135292		0.962706	3	26	inositol phosphate-mediated signaling	BP	Lmcd1, Rcan1, Chp1
GO:0014902	0.13535		0.940825	6	74	myotube differentiation	BP	Stim1, Smyd3, Gsk3b, Rcan1, Bcl2, Ryr1
GO:0071450	0.13553		0.97513	2	15	cellular response to oxygen radical	BP	Gch1, Atp7a
GO:0071451	0.13553		0.97513	2	15	cellular response to superoxide	BP	Gch1, Atp7a
GO:0048861	0.13554		0.993487	1	3	leukemia inhibitory factor signaling pathway	BP	Lifr
GO:0036446	0.135574		0.993484	1	3	myofibroblast differentiation	BP	Trp53inp1
GO:1904760	0.135574		0.993484	1	3	regulation of myofibroblast differentiation	BP	Trp53inp1
GO:0005109	0.135654		0.962297	3	29	frizzled binding	MF	Rspo3, Fzd1, Gopc
GO:0044381	0.135669		0.97548	2	13	glucose import in response to insulin stimulus	BP	Osbpl8, Irs1
GO:0019740	0.135738		0.99268	1	4	nitrogen utilization	BP	Bcl2
GO:0010737	0.135759		0.962858	3	23	protein kinase A signaling	BP	Tcp11, Pde10a, Aip
GO:0014916	0.135968		0.993445	1	3	regulation of lung blood pressure	BP	Gch1
GO:0032899	0.135982		0.993443	1	3	regulation of neurotrophin production	BP	Hap1
GO:0005519	0.136514		0.99339	1	3	cytoskeletal regulatory protein binding	MF	Map2
GO:1903670	0.136678		0.961968	3	28	regulation of sprouting angiogenesis	BP	Ghsr, Nr2e1, Jak1
GO:0008331	0.136694		0.975731	2	11	high voltage-gated calcium channel activity	MF	Cacnb4, Cacnb3
GO:0009445	0.136941		0.992546	1	4	putrescine metabolic process	BP	Odc1
GO:0072540	0.136965		0.993345	1	3	T-helper 17 cell lineage commitment	BP	Stat3
GO:1902746	0.137005		0.993341	1	3	regulation of lens fiber cell differentiation	BP	Zeb2
GO:0014063	0.137138		0.992524	1	4	negative regulation of serotonin secretion	BP	Hrh3
GO:1900194	0.137192		0.992518	1	4	negative regulation of oocyte maturation	BP	Shb
GO:0005003	0.137218		0.97503	2	13	ephrin receptor activity	MF	Epha3, Epha5
GO:0098869	0.137369		0.974589	2	15	cellular oxidant detoxification	BP	Gch1, Atp7a
GO:0006892	0.1375		0.939573	6	76	post-Golgi vesicle-mediated transport	BP	Ccdc91, Optn, Wipi1, Tgoln1, Acsl3, Gopc
GO:1902455	0.137694		0.993271	1	3	negative regulation of stem cell population maintenance	BP	Zfp706
GO:1901069	0.137905		0.992437	1	4	guanosine-containing compound catabolic process	BP	Hprt
5340	0.137925		0.974424	2	15	Primary immunodeficiency	KEGG	Tap1, Rfx5
GO:0043985	0.137934		0.992434	1	4	histone H4-R3 methylation	BP	Coprs
GO:0003105	0.138068		0.993233	1	3	negative regulation of glomerular filtration	BP	Ptpro
GO:0019933	0.138514		0.944645	5	59	cAMP-mediated signaling	BP	Tcp11, Pde10a, Adcy5, Rapgef2, Epha5
GO:0000237	0.138559		0.992363	1	4	leptotene	BP	Xrcc5
GO:0007128	0.138559		0.992363	1	4	meiotic prophase I	BP	Xrcc5
GO:0051324	0.138559		0.992363	1	4	prophase	BP	Xrcc5
GO:0065008	0.13858		0.883844	118	2384	regulation of biological quality	BP	Rnf128, Ghsr, Rhoq, Samd4, Nefm, Osbpl8, Gch1, Cntn2, Hap1, Rad51d, Rab3d, Plxnc1, Kcnc4, Arrdc3, Slc4a8, Vav2, Stim1, Islr2, Hrh3, Jun, Glrx, Carhsp1, Nxn, Slc9a9, Tapbp, Wfs1, Trdn, Dock11, Ank1, Stat3, Nanos1, Cnr1, Ret, Anxa5, Cacnb4, Nr2e1, Flrt1, Gsr, Cdo1, Xrcc5, Ndufaf2, Clcn3, Parva, Zbtb18, Cacnb3, Bscl2, Hadh, Fam155a, Syt13, Nucb2, Dzip1, Skil, Ptpro, Cadps, Mcur1, Fermt2, Cdc42ep2, N…
GO:0048022	0.138675		0.993172	1	3	negative regulation of melanin biosynthetic process	BP	Rapgef2
GO:1900377	0.138675		0.993172	1	3	negative regulation of secondary metabolite biosynthetic process	BP	Rapgef2
GO:0045163	0.138924		0.993146	1	3	clustering of voltage-gated potassium channels	BP	Cntn2
GO:0004949	0.138949		0.993144	1	3	cannabinoid receptor activity	MF	Cnr1
GO:0061833	0.138965		0.993142	1	3	protein localization to tricellular tight junction	BP	Mapk9
GO:2001214	0.139014		0.992311	1	4	positive regulation of vasculogenesis	BP	Rapgef2
GO:2000651	0.139087		0.974484	2	13	positive regulation of sodium ion transmembrane transporter activity	BP	Glrx, Chp1
GO:0003091	0.139168		0.993121	1	3	renal water homeostasis	BP	Wfs1
GO:0005127	0.139265		0.993111	1	3	ciliary neurotrophic factor receptor binding	MF	Lifr
GO:0016433	0.139454		0.992261	1	4	rRNA (adenine) methyltransferase activity	MF	Tfb2m
GO:0072603	0.139511		0.993086	1	3	interleukin-5 secretion	BP	Tnfrsf21
GO:2000662	0.139511		0.993086	1	3	regulation of interleukin-5 secretion	BP	Tnfrsf21
GO:0046325	0.139524		0.974136	2	14	negative regulation of glucose import	BP	Rhoq, Ahi1
GO:0031622	0.139548		0.993082	1	3	positive regulation of fever generation	BP	Cnr1
GO:0000062	0.139778		0.973436	2	18	fatty-acyl-CoA binding	MF	Acot7, Dbi
GO:0008089	0.139824		0.96046	3	31	anterograde axonal transport	BP	Hap1, Ap3m2, Trak1
GO:1904706	0.140138		0.992182	1	4	negative regulation of vascular smooth muscle cell proliferation	BP	Tgfb3
GO:1903903	0.14027		0.993008	1	3	regulation of establishment of T cell polarity	BP	Flot2
GO:0007423	0.140429		0.905055	22	358	sensory organ development	BP	Jun, Hipk1, Myo3b, Stat3, Nr2e1, Crb1, Ahi1, Gpm6a, H2-DMa, Skil, Cys1, Col8a1, Zeb2, Dscam, Atp8a2, Meis2, Ttll5, Bcl2, Sp3, Tshz1, Lrp10, Stau2
GO:0072092	0.140757		0.994674	1	2	ureteric bud invasion	BP	Kif26b
GO:0038023	0.140849		0.901498	26	449	signaling receptor activity	MF	Sostdc1, Ghsr, Gpr50, Fzd1, Ly6g6e, Plxnc1, Hrh3, Ptprh, Prokr2, Gabrq, Cntfr, Cnr1, Ret, Nr2e1, Lifr, Gabra3, Nrp2, Chrna1, Gabrg2, Nr2c2, Epha3, Gpr85, Epha5, Unc13c, Tnfrsf21, Ryr1
GO:0086047	0.141033		0.992929	1	3	membrane depolarization during Purkinje myocyte cell action potential	BP	Scn1b
4610	0.14121		0.973129	2	17	Complement and coagulation cascades	KEGG	Plat, Masp1
GO:0034308	0.141504		0.972794	2	19	primary alcohol metabolic process	BP	Gde1, Aldh3a2
GO:0017154	0.141613		0.974696	2	10	semaphorin receptor activity	MF	Plxnc1, Nrp2
GO:0097048	0.141794		0.99285	1	3	dendritic cell apoptotic process	BP	Rapgef2
GO:2000668	0.141794		0.99285	1	3	regulation of dendritic cell apoptotic process	BP	Rapgef2
GO:0006895	0.141915		0.973423	2	14	Golgi to endosome transport	BP	Wipi1, Tgoln1
GO:0072298	0.141975		0.992831	1	3	regulation of metanephric glomerulus development	BP	Ret
GO:2000273	0.142081		0.959872	3	27	positive regulation of receptor activity	BP	Hap1, Trdn, Neurl1a
GO:0019886	0.142369		0.991406	1	5	antigen processing and presentation of exogenous peptide antigen via MHC class II	BP	H2-DMa
GO:0051684	0.142569		0.992769	1	3	maintenance of Golgi location	BP	Arhgap21
GO:0021692	0.142615		0.973438	2	13	cerebellar Purkinje cell layer morphogenesis	BP	Faim2, Atp7a
GO:0002292	0.142812		0.959391	3	29	T cell differentiation involved in immune response	BP	Shb, Stat3, Atp7a
GO:0060675	0.143147		0.949632	4	42	ureteric bud morphogenesis	BP	Bcl2, Ctnnbip1, Pbx1, Kif26b
GO:0034714	0.144002		0.992617	1	3	type III transforming growth factor beta receptor binding	MF	Tgfb3
GO:0022843	0.144086		0.927194	8	107	voltage-gated cation channel activity	MF	Cacng5, Kcnc4, Cacnb4, Cacnb3, Kcna3, Kcnj11, Kcnj16, Ryr1
GO:0044860	0.144164		0.9926	1	3	protein localization to plasma membrane raft	BP	Flot2
GO:0051354	0.144452		0.972286	2	16	negative regulation of oxidoreductase activity	BP	Cnr1, Gsk3b
5414	0.144492		0.935818	6	69	Dilated cardiomyopathy	KEGG	Cacng5, Lama2, Tgfb3, Cacnb4, Cacnb3, Adcy5
GO:0046716	0.144579		0.972618	2	14	muscle cell cellular homeostasis	BP	Chrna1, Mstn
GO:0004675	0.144886		0.972525	2	14	transmembrane receptor protein serine/threonine kinase activity	MF	Sostdc1, Ly6g6e
GO:0070291	0.144947		0.991618	1	4	N-acylethanolamine metabolic process	BP	Gde1
GO:1902117	0.144977		0.941304	5	57	positive regulation of organelle assembly	BP	Hap1, Stx18, Cep120, Mapk9, Cep135
GO:1901615	0.145359		0.908057	16	278	organic hydroxy compound metabolic process	BP	Gch1, Spr, Hprt, Mvk, Gde1, Zeb2, Sncb, Npc2, Cyb5r3, Pdxp, Bcl2, Aldh3a2, Rapgef2, Cat, Atp7a, Sqle
GO:0007204	0.145431		0.917392	11	165	positive regulation of cytosolic calcium ion concentration	BP	Hap1, Hrh3, Trdn, Cacnb3, Fam155a, Dbi, Adcy5, Ank2, Slc8a3, Bcl2, Ryr1
GO:0034204	0.145557		0.972828	2	12	lipid translocation	BP	Atp8a2, Atp11c
GO:0030098	0.145628		0.912944	13	203	lymphocyte differentiation	BP	Themis, Shb, Dock11, Stat3, Lgals8, Zfp608, H2-DMa, Cbfb, Bcl11a, Bcl2, Sp3, Atp7a, Atp11c
GO:0016530	0.145809		0.990612	1	6	metallochaperone activity	MF	Atp7a
GO:0010735	0.14588		0.992417	1	3	positive regulation of transcription via serum response element binding	BP	Mical2
GO:1904306	0.145952		0.991497	1	4	positive regulation of gastro-intestinal system smooth muscle contraction	BP	Ghsr
GO:0032104	0.146001		0.971518	2	18	regulation of response to extracellular stimulus	BP	Ghsr, Nucb2
GO:0032107	0.146001		0.971518	2	18	regulation of response to nutrient levels	BP	Ghsr, Nucb2
GO:0048521	0.146202		0.971592	2	17	negative regulation of behavior	BP	Ghsr, Arrdc3
GO:0101023	0.146212		0.991466	1	4	vascular endothelial cell proliferation	BP	Ghsr
GO:1905562	0.146212		0.991466	1	4	regulation of vascular endothelial cell proliferation	BP	Ghsr
GO:0016054	0.146223		0.925553	8	129	organic acid catabolic process	BP	Cnr1, Cdo1, Hadh, Acot7, Dbi, Hibadh, Irs1, Aldh4a1
GO:0046395	0.146223		0.925553	8	129	carboxylic acid catabolic process	BP	Cnr1, Cdo1, Hadh, Acot7, Dbi, Hibadh, Irs1, Aldh4a1
GO:0051235	0.146282		0.912491	13	202	maintenance of location	BP	Osbpl8, Hap1, Trdn, Bscl2, Dzip1, Dbi, Ywhab, Ank2, Abhd5, Arhgap21, Tnrc6a, Gopc, Ryr1
GO:0046684	0.146344		0.992367	1	3	response to pyrethroid	BP	Scn1b
GO:0015662	0.146546		0.957685	3	31	ATPase activity, coupled to transmembrane movement of ions, phosphorylative mechanism	MF	Anxa5, Atp6v1g2, Atp7a
GO:0032847	0.146578		0.991422	1	4	regulation of cellular pH reduction	BP	Bcl2
GO:0001867	0.146664		0.991411	1	4	complement activation, lectin pathway	BP	Masp1
GO:0040018	0.146992		0.957662	3	29	positive regulation of multicellular organism growth	BP	Ghsr, Atp8a2, Bcl2
GO:1990868	0.147156		0.992278	1	3	response to chemokine	BP	Lrch1
GO:1990869	0.147156		0.992278	1	3	cellular response to chemokine	BP	Lrch1
GO:0032308	0.147282		0.991336	1	4	positive regulation of prostaglandin secretion	BP	Mapk9
GO:0008593	0.147333		0.939898	5	61	regulation of Notch signaling pathway	BP	Stat3, Bend6, Neurl1a, Poglut1, Postn
GO:0045309	0.147419		0.947512	4	43	protein phosphorylated amino acid binding	MF	Vav2, Shb, Ywhab, Irs1
GO:2000110	0.147469		0.992244	1	3	negative regulation of macrophage apoptotic process	BP	Ghsr
GO:1990709	0.147579		0.992232	1	3	presynaptic active zone organization	BP	Pcdh17
GO:0023016	0.147583		0.992232	1	3	signal transduction by trans-phosphorylation	BP	Wnk1
GO:0046292	0.147707		0.991284	1	4	formaldehyde metabolic process	BP	Aldh3a2
GO:0016616	0.147792		0.93922	5	77	oxidoreductase activity, acting on the CH-OH group of donors, NAD or NADP as acceptor	MF	Cryl1, Spr, Hadh, Hibadh, Kdsr
GO:0006570	0.14796		0.991253	1	4	tyrosine metabolic process	BP	Atp7a
GO:0090596	0.148055		0.913358	12	177	sensory organ morphogenesis	BP	Hipk1, Myo3b, Stat3, Crb1, Ahi1, Col8a1, Dscam, Atp8a2, Bcl2, Sp3, Tshz1, Stau2
GO:0051434	0.148223		0.991221	1	4	BH3 domain binding	MF	Bcl2
GO:0032058	0.148232		0.992161	1	3	positive regulation of translational initiation in response to stress	BP	Impact
GO:0051901	0.148261		0.991216	1	4	positive regulation of mitochondrial depolarization	BP	Mllt11
GO:2000182	0.14834		0.992149	1	3	regulation of progesterone biosynthetic process	BP	Ppargc1a
GO:0042803	0.148406		0.891679	32	621	protein homodimerization activity	MF	Zhx2, Nrn1, Gch1, Fzd1, Cryl1, Hlcs, Spr, Tap1, Jun, Masp1, Cenpf, Olfm4, Stat3, Nacc2, Dynll2, Cadm2, Gsr, Hprt, Ptpro, Dst, Acot7, Dck, Inpp5f, Pdxp, Bcl2, Cat, Aldh9a1, Tmem192, Runx1t1, Mstn, Odc1, Gopc
GO:0010898	0.148618		0.991173	1	4	positive regulation of triglyceride catabolic process	BP	Abhd5
GO:0050884	0.148642		0.971373	2	14	neuromuscular process controlling posture	BP	Gch1, Atp8a2
GO:1905071	0.148771		0.992102	1	3	occluding junction disassembly	BP	Tgfb3
GO:1905073	0.148771		0.992102	1	3	regulation of occluding junction disassembly	BP	Tgfb3
GO:1905075	0.148771		0.992102	1	3	positive regulation of occluding junction disassembly	BP	Tgfb3
GO:0030167	0.149143		0.992061	1	3	proteoglycan catabolic process	BP	Adamts12
GO:0000989	0.149259		0.897301	23	401	transcription factor activity, transcription factor binding	MF	Zhx2, Jun, Hipk1, Tead1, Lmcd1, Nfib, Nacc2, Myt1l, Skil, Cbfb, Cys1, Bcl11a, Tfb2m, Ywhab, Bend6, Zhx1, Meis2, Med12l, Aip, Jazf1, Ppargc1a, Runx1t1, Bcor
GO:0043433	0.14941		0.927709	7	103	negative regulation of DNA binding transcription factor activity	BP	Wfs1, Cys1, Ctnnbip1, Cat, Pbx1, Chp1, Traf3
GO:0001191	0.149508		0.956608	3	29	transcriptional repressor activity, RNA polymerase II transcription factor binding	MF	Nfib, Cys1, Bend6
GO:0072171	0.149663		0.946417	4	43	mesonephric tubule morphogenesis	BP	Bcl2, Ctnnbip1, Pbx1, Kif26b
GO:0045409	0.149731		0.991035	1	4	negative regulation of interleukin-6 biosynthetic process	BP	Ghsr
GO:0046903	0.149804		0.887287	39	715	secretion	BP	Ghsr, Hap1, Rab3d, Kcnc4, Optn, Hrh3, Glrx, Vamp1, Tgfb3, Cnr1, Anxa5, Cacnb4, Ahi1, Cdo1, Ndufaf2, Hadh, Syt13, Nucb2, Scamp1, Cadps, Wnk1, Sv2a, Scrn1, Adcy5, Prepl, Neurl1a, Irs1, Mapk9, Kcnj11, Acsl3, Epha5, Pcp4, Unc13c, Postn, Tnfrsf21, Cplx2, Anxa3, Nsf, Chp1
GO:0098907	0.149827		0.993934	1	2	regulation of SA node cell action potential	BP	Ank2
GO:1902953	0.15011		0.990988	1	4	positive regulation of ER to Golgi vesicle-mediated transport	BP	Stx18
GO:0046626	0.150312		0.946099	4	43	regulation of insulin receptor signaling pathway	BP	Osbpl8, Nucb2, Irs1, Mstn
730	0.150397		0.990953	1	4	Thiamine metabolism	KEGG	Tpk1
GO:0032415	0.150415		0.99095	1	4	regulation of sodium:proton antiporter activity	BP	Chp1
GO:0004003	0.150448		0.956213	3	29	ATP-dependent DNA helicase activity	MF	Chd1l, Mcm6, Xrcc5
GO:0008022	0.150467		0.909494	13	209	protein C-terminus binding	MF	Eml2, Optn, Cenpf, Xrcc5, Rbfox1, Ywhab, Ago2, Cep120, Kcnj11, Cep135, Gopc, Nsf, Lmo7
GO:0033013	0.150921		0.955452	3	37	tetrapyrrole metabolic process	BP	Ank1, Mmab, Uros
GO:0046125	0.151069		0.990869	1	4	pyrimidine deoxyribonucleoside metabolic process	BP	Dck
GO:0005244	0.151142		0.916192	10	144	voltage-gated ion channel activity	MF	Cacng5, Kcnc4, Cacnb4, Clcn3, Cacnb3, Kcna3, Scn1b, Kcnj11, Kcnj16, Ryr1
GO:0022832	0.151142		0.916192	10	144	voltage-gated channel activity	MF	Cacng5, Kcnc4, Cacnb4, Clcn3, Cacnb3, Kcna3, Scn1b, Kcnj11, Kcnj16, Ryr1
GO:0055082	0.151212		0.892592	27	486	cellular chemical homeostasis	BP	Hap1, Slc4a8, Stim1, Hrh3, Slc9a9, Wfs1, Trdn, Cacnb4, Ndufaf2, Clcn3, Cacnb3, Fam155a, Nucb2, Mcur1, Dbi, Sv2a, Adcy5, Ank2, Slc9a6, Tmem178, Slc8a3, Micu2, Bcl2, Epha5, Atp7a, Chp1, Ryr1
GO:0042276	0.15123		0.991828	1	3	error-prone translesion synthesis	BP	Rev3l
GO:0006810	0.151363		0.87075	148	3133	transport	BP	Cacng5, Ghsr, Rhoq, Nefm, Pcdh17, Osbpl8, Txnip, Cntn2, Fzd1, Hap1, Nipal3, Slc43a2, Rab3d, Ap3m2, Kcnc4, Ccdc91, Hist1h1a, Slc4a8, Stim1, Optn, Tap1, Hrh3, Jun, Glrx, Gabrq, Slc9a9, Trpm3, Pitpnm3, Wfs1, Trdn, Cenpf, Stam2, Vamp1, Ank1, Tacc1, Nup93, Arl4c, Stat3, Tmem184c, Tgfb3, Cnr1, Mmgt1, Wipi1, Aifm3, Dynll2, Ifi27, Anxa5, Slc16a6, Cacnb4, Ndfip2, Nbas, Slco5a1, Tgoln1, Ahi1, Cdo1, Ndufaf2…
GO:0006635	0.151459		0.945153	4	51	fatty acid beta-oxidation	BP	Cnr1, Hadh, Dbi, Irs1
GO:0045838	0.151657		0.970036	2	16	positive regulation of membrane potential	BP	Glrx, Gsk3b
GO:0021678	0.151713		0.990788	1	4	third ventricle development	BP	Dpcd
GO:0060397	0.151917		0.991751	1	3	JAK-STAT cascade involved in growth hormone signaling pathway	BP	Stat3
GO:0099580	0.151962		0.993753	1	2	ion antiporter activity involved in regulation of postsynaptic membrane potential	MF	Slc8a3
GO:0045118	0.151995		0.990752	1	4	azole transporter activity	MF	Slc15a4
GO:1901474	0.151995		0.990752	1	4	azole transmembrane transporter activity	MF	Slc15a4
GO:0010524	0.152575		0.955142	3	31	positive regulation of calcium ion transport into cytosol	BP	Hap1, Trdn, Dbi
GO:0010827	0.152609		0.937087	5	60	regulation of glucose transport	BP	Rhoq, Osbpl8, Ahi1, Slc1a2, Irs1
GO:0047134	0.152719		0.990066	1	5	protein-disulfide reductase activity	MF	Nxn
GO:0051562	0.153023		0.990622	1	4	negative regulation of mitochondrial calcium ion concentration	BP	Micu2
GO:0051952	0.153098		0.936619	5	66	regulation of amine transport	BP	Ghsr, Hrh3, Cnr1, Sv2a, Pcp4
GO:0010360	0.153401		0.991583	1	3	negative regulation of anion channel activity	BP	Gopc
5210	0.153799		0.936477	5	59	Colorectal cancer	KEGG	Jun, Tgfb3, Gsk3b, Bcl2, Mapk9
GO:0042538	0.153819		0.989917	1	5	hyperosmotic salinity response	BP	Xrcc5
GO:0008237	0.154027		0.920826	8	114	metallopeptidase activity	MF	Adamts8, Cpxm2, Agbl4, Ermp1, Metap2, Adamts12, Adam23, Cpe
GO:0015679	0.154388		0.99147	1	3	plasma membrane copper ion transport	BP	Atp7a
GO:0051006	0.154611		0.989809	1	5	positive regulation of lipoprotein lipase activity	BP	Abhd5
GO:0061365	0.154611		0.989809	1	5	positive regulation of triglyceride lipase activity	BP	Abhd5
GO:0060633	0.154675		0.990411	1	4	negative regulation of transcription initiation from RNA polymerase II promoter	BP	Ctnnbip1
GO:0060278	0.15472		0.990406	1	4	regulation of ovulation	BP	Plat
GO:0010522	0.154779		0.935868	5	61	regulation of calcium ion transport into cytosol	BP	Hap1, Trdn, Dbi, Ank2, Bcl2
GO:0045793	0.154854		0.969426	2	14	positive regulation of cell size	BP	Ret, Atp7a
GO:1902202	0.155166		0.99138	1	3	regulation of hepatocyte growth factor receptor signaling pathway	BP	Adamts12
GO:0033762	0.155176		0.990347	1	4	response to glucagon	BP	Cdo1
GO:0009952	0.155369		0.916481	9	125	anterior/posterior pattern specification	BP	Pcdh8, Hipk1, Zeb2, Ctnnbip1, Poglut1, Atp6ap2, Tshz1, Pbx1, Emx2
GO:0045471	0.155643		0.943251	4	47	response to ethanol	BP	Cnr1, Cdo1, Trp53inp1, Bcl2
GO:0060605	0.155737		0.991314	1	3	tube lumen cavitation	BP	Nfib
GO:0060662	0.155737		0.991314	1	3	salivary gland cavitation	BP	Nfib
GO:0048070	0.155795		0.969127	2	14	regulation of developmental pigmentation	BP	Zeb2, Bcl2
GO:0010968	0.155938		0.991291	1	3	regulation of microtubule nucleation	BP	Eml2
GO:0022417	0.155954		0.989625	1	5	protein maturation by protein folding	BP	Aip
GO:0072593	0.156053		0.912644	10	169	reactive oxygen species metabolic process	BP	Gch1, Spr, Stat3, Ndufaf2, Clcn3, Sh3pxd2a, Bcl2, Cat, Mapk9, Atp7a
GO:0061091	0.156155		0.991266	1	3	regulation of phospholipid translocation	BP	Atp8a2
GO:0061092	0.156155		0.991266	1	3	positive regulation of phospholipid translocation	BP	Atp8a2
GO:1904018	0.156343		0.928645	6	81	positive regulation of vasculature development	BP	Ghsr, Stim1, Nr2e1, Rapgef2, Anxa3, Jak1
GO:0009055	0.15649		0.952479	3	51	electron transfer activity	MF	Glrx, Gsr, Ndufaf2
GO:0071548	0.156498		0.968484	2	16	response to dexamethasone	BP	Smyd3, Mstn
GO:0072329	0.156498		0.934641	5	70	monocarboxylic acid catabolic process	BP	Cnr1, Hadh, Acot7, Dbi, Irs1
GO:0034765	0.156811		0.896887	18	301	regulation of ion transmembrane transport	BP	Cacng5, Hap1, Kcnc4, Stim1, Glrx, Trdn, Cacnb4, Cacnb3, Dbi, Kcna3, Scn1b, Ank2, Kcnj11, Ppargc1a, Atp7a, Kcnj16, Gopc, Chp1
GO:0009584	0.157022		0.96851	2	15	detection of visible light	BP	Cacnb4, Atp8a2
GO:1990791	0.157176		0.991147	1	3	dorsal root ganglion development	BP	Nrp2
GO:0000987	0.157259		0.899375	16	263	core promoter proximal region sequence-specific DNA binding	MF	Jun, Tead1, Nfib, Stat3, Nacc2, Skil, Nfia, Cys1, Bcl11a, Nkrf, Meis2, Neurod6, Sp3, Nr2c2, Rfx5, Pbx1
GO:0031161	0.157275		0.991135	1	3	phosphatidylinositol catabolic process	BP	Inpp5f
GO:0034236	0.157417		0.968608	2	14	protein kinase A catalytic subunit binding	MF	Pkia, Gsk3b
GO:0055114	0.157426		0.885468	30	647	oxidation-reduction process	BP	Gpx8, Cryl1, Spr, Glrx, Nxn, Dhrs7, Cnr1, Aifm3, Gsr, Cdo1, Ndufaf2, Hadh, Nucb2, Dbi, Gsk3b, Sh3pxd2a, Hibadh, Cox20, Cyb5r3, Irs1, Aldh7a1, Aldh3a2, Kdsr, Cat, Tmx4, Aldh9a1, Ppargc1a, Mical2, Sqle, Aldh4a1
GO:0070838	0.15768		0.896231	18	301	divalent metal ion transport	BP	Cacng5, Hap1, Nipal3, Stim1, Wfs1, Trdn, Mmgt1, Cacnb4, Cacnb3, Fam155a, Mcur1, Dbi, Ank2, Tusc3, Slc8a3, Micu2, Bcl2, Ryr1
GO:0045103	0.157714		0.952934	3	31	intermediate filament-based process	BP	Nefm, Tchh, Atp8a2
GO:0045104	0.157714		0.952934	3	31	intermediate filament cytoskeleton organization	BP	Nefm, Tchh, Atp8a2
GO:0031697	0.158156		0.991032	1	3	beta-1 adrenergic receptor binding	MF	Rapgef2
GO:0008201	0.158309		0.927542	6	79	heparin binding	MF	Adamts8, Rspo3, Hist1h1a, Nrp2, Mstn, Postn
GO:0060993	0.158594		0.933853	5	59	kidney morphogenesis	BP	Ahi1, Bcl2, Ctnnbip1, Pbx1, Kif26b
GO:0014053	0.15872		0.989884	1	4	negative regulation of gamma-aminobutyric acid secretion	BP	Hrh3
GO:0035093	0.159058		0.990925	1	3	spermatogenesis, exchange of chromosomal proteins	BP	Chd5
GO:0050793	0.15918		0.868504	87	1706	regulation of developmental process	BP	Sostdc1, Ghsr, Rhoq, Zhx2, Nefm, Cntn2, Fzd1, Hap1, Spr, Plxnc1, Stim1, Islr2, Jun, Ust, Tead1, Nfib, Tcp11, Lama2, Kndc1, Cenpf, Arsb, Shb, Olfm4, Stat3, Tgfb3, Cnr1, Tbr1, Ret, Nr2e1, Flrt1, Ahi1, Xrcc5, Parva, Rbfox1, Grn, Zfp608, Nucb2, H2-DMa, Skil, Fermt2, Cdc42ep2, Trp53inp1, Bcl11a, Zeb2, Rassf2, Dscam, Atp8a2, Gsk3b, Scn1b, Bend6, Map2, Meis2, Pak3, Neurl1a, Sdc2, Tmem178, Inpp5f, Chd5, …
GO:0006821	0.159258		0.933337	5	63	chloride transport	BP	Gabrq, Gabra3, Clcn3, Ano10, Gabrg2
GO:0042036	0.159367		0.967549	2	16	negative regulation of cytokine biosynthetic process	BP	Rnf128, Ghsr
GO:0007186	0.159478		0.890249	22	398	G-protein coupled receptor signaling pathway	BP	Ghsr, Gpr50, Rgs13, Cntn2, Fzd1, Ly6g6e, Arrdc3, Hrh3, Prokr2, Gabrq, Rgs5, Cnr1, Cacnb4, Gabra3, Gde1, Ubqln2, Ywhab, Adcy5, Gprasp1, Rapgef2, Gabrg2, Gpr85
GO:0000303	0.159643		0.967459	2	16	response to superoxide	BP	Gch1, Atp7a
GO:2000142	0.159685		0.952078	3	31	regulation of DNA-templated transcription, initiation	BP	Jun, Morc1, Ctnnbip1
GO:0035610	0.159896		0.989728	1	4	protein side chain deglutamylation	BP	Agbl4
GO:0072080	0.159941		0.93311	5	59	nephron tubule development	BP	Ahi1, Bcl2, Ctnnbip1, Pbx1, Kif26b
GO:0035255	0.15996		0.952241	3	28	ionotropic glutamate receptor binding	MF	Gsk3b, Flot2, Nsf
GO:0006269	0.160122		0.989698	1	4	DNA replication, synthesis of RNA primer	BP	Prim2
GO:0014910	0.160161		0.932989	5	59	regulation of smooth muscle cell migration	BP	Bcl2, Ppargc1a, Dock5, Atp7a, Postn
GO:0071670	0.160227		0.989684	1	4	smooth muscle cell chemotaxis	BP	Parva
GO:0001159	0.160391		0.897047	16	264	core promoter proximal region DNA binding	MF	Jun, Tead1, Nfib, Stat3, Nacc2, Skil, Nfia, Cys1, Bcl11a, Nkrf, Meis2, Neurod6, Sp3, Nr2c2, Rfx5, Pbx1
GO:1901655	0.160824		0.940699	4	46	cellular response to ketone	BP	Smyd3, Adcy5, Epha5, Mstn
GO:0071300	0.161081		0.951652	3	29	cellular response to retinoic acid	BP	Tead1, Ret, Epha3
GO:0015187	0.161171		0.989557	1	4	glycine transmembrane transporter activity	MF	Slc36a1
GO:0005254	0.161418		0.940296	4	48	chloride channel activity	MF	Gabrq, Gabra3, Clcn3, Gabrg2
GO:0072511	0.161631		0.893237	18	302	divalent inorganic cation transport	BP	Cacng5, Hap1, Nipal3, Stim1, Wfs1, Trdn, Mmgt1, Cacnb4, Cacnb3, Fam155a, Mcur1, Dbi, Ank2, Tusc3, Slc8a3, Micu2, Bcl2, Ryr1
GO:0071103	0.16165		0.91194	9	159	DNA conformation change	BP	Nap1l5, Hist1h1a, Mcm6, Smyd3, Anp32e, Chd5, Tspyl4, Hist2h2bb, Nap1l2
GO:0046942	0.161703		0.90615	11	174	carboxylic acid transport	BP	Slc43a2, Hrh3, Slc16a6, Cacnb4, Slc17a8, Slc1a2, Sv2a, Slc15a4, Mapk9, Acsl3, Slc36a1
GO:0008934	0.161713		0.989484	1	4	inositol monophosphate 1-phosphatase activity	MF	Inpp5f
GO:0052832	0.161713		0.989484	1	4	inositol monophosphate 3-phosphatase activity	MF	Inpp5f
GO:0052833	0.161713		0.989484	1	4	inositol monophosphate 4-phosphatase activity	MF	Inpp5f
GO:0052834	0.161713		0.989484	1	4	inositol monophosphate phosphatase activity	MF	Inpp5f
GO:0005001	0.161963		0.990577	1	3	transmembrane receptor protein tyrosine phosphatase activity	MF	Ptprh
GO:0019198	0.161963		0.990577	1	3	transmembrane receptor protein phosphatase activity	MF	Ptprh
GO:0099552	0.162012		0.990571	1	3	trans-synaptic signaling by lipid, modulating synaptic transmission	BP	Cnr1
GO:0099553	0.162012		0.990571	1	3	trans-synaptic signaling by endocannabinoid, modulating synaptic transmission	BP	Cnr1
GO:0048793	0.162077		0.989435	1	4	pronephros development	BP	Ahi1
GO:0070170	0.162157		0.990553	1	3	regulation of tooth mineralization	BP	Bcor
GO:0051046	0.162537		0.882842	28	502	regulation of secretion	BP	Ghsr, Hap1, Rab3d, Kcnc4, Hrh3, Glrx, Tgfb3, Cnr1, Anxa5, Ahi1, Ndufaf2, Hadh, Syt13, Nucb2, Cadps, Wnk1, Sv2a, Adcy5, Prepl, Irs1, Mapk9, Kcnj11, Acsl3, Epha5, Pcp4, Postn, Tnfrsf21, Nsf
GO:0060060	0.162598		0.990499	1	3	post-embryonic retina morphogenesis in camera-type eye	BP	Dscam
GO:0014031	0.162618		0.939903	4	44	mesenchymal cell development	BP	Ret, Nrp2, Zeb2, Bcl2
GO:1903071	0.162623		0.988685	1	5	positive regulation of ER-associated ubiquitin-dependent protein catabolic process	BP	Ubqln2
GO:0060022	0.162636		0.990495	1	3	hard palate development	BP	Fzd1
GO:0065004	0.162714		0.914827	8	149	protein-DNA complex assembly	BP	Nap1l5, Rad51d, Hist1h1a, Smyd3, Anp32e, Tspyl4, Hist2h2bb, Nap1l2
GO:0072611	0.162951		0.989316	1	4	interleukin-13 secretion	BP	Tnfrsf21
GO:2000665	0.162951		0.989316	1	4	regulation of interleukin-13 secretion	BP	Tnfrsf21
GO:0015849	0.163128		0.90515	11	175	organic acid transport	BP	Slc43a2, Hrh3, Slc16a6, Cacnb4, Slc17a8, Slc1a2, Sv2a, Slc15a4, Mapk9, Acsl3, Slc36a1
GO:0006446	0.163282		0.939209	4	51	regulation of translational initiation	BP	Klhl25, Ago2, Habp4, Impact
GO:0001835	0.163528		0.989238	1	4	blastocyst hatching	BP	Grn
GO:0035188	0.163528		0.989238	1	4	hatching	BP	Grn
GO:0071684	0.163528		0.989238	1	4	organism emergence from protective structure	BP	Grn
GO:0007340	0.163598		0.965968	2	17	acrosome reaction	BP	Gnpda1, Tcp11
GO:0010728	0.163601		0.989227	1	4	regulation of hydrogen peroxide biosynthetic process	BP	Stat3
GO:2000587	0.163701		0.990365	1	3	negative regulation of platelet-derived growth factor receptor-beta signaling pathway	BP	Glrx
GO:0004705	0.16371		0.990364	1	3	JUN kinase activity	MF	Mapk9
GO:0016909	0.16371		0.990364	1	3	SAP kinase activity	MF	Mapk9
GO:0045742	0.163722		0.966317	2	15	positive regulation of epidermal growth factor receptor signaling pathway	BP	Hap1, Neurl1a
GO:0014891	0.163954		0.989179	1	4	striated muscle atrophy	BP	Mstn
GO:0006824	0.163988		0.989175	1	4	cobalt ion transport	BP	Mmgt1
GO:0010700	0.164311		0.98913	1	4	negative regulation of norepinephrine secretion	BP	Ghsr
GO:0001515	0.164676		0.988387	1	5	opioid peptide activity	MF	Cdc42ep2
GO:0042756	0.164862		0.988359	1	5	drinking behavior	BP	Hrh3
GO:0051541	0.16487		0.989053	1	4	elastin metabolic process	BP	Atp7a
GO:0002429	0.16521		0.92338	6	82	immune response-activating cell surface receptor signaling pathway	BP	Themis, Shb, Cacnb4, Cacnb3, Bcl2, Tnfrsf21
GO:1903579	0.165595		0.965132	2	18	negative regulation of ATP metabolic process	BP	Stat3, Ppargc1a
GO:0043531	0.165615		0.949384	3	32	ADP binding	MF	Tap1, Cyb5r3, Gclc
GO:0034599	0.165698		0.903264	11	186	cellular response to oxidative stress	BP	Gch1, Fzd1, Jun, Glrx, Nup93, Trp53inp1, Bcl2, Mapk9, Ppargc1a, Atp7a, Impact
GO:0008343	0.165784		0.988224	1	5	adult feeding behavior	BP	Ghsr
GO:0019530	0.166064		0.988183	1	5	taurine metabolic process	BP	Cdo1
GO:0033004	0.166089		0.988884	1	4	negative regulation of mast cell activation	BP	Cnr1
GO:1901031	0.166095		0.949014	3	34	regulation of response to reactive oxygen species	BP	Gch1, Glrx, Nup93
GO:0060316	0.166201		0.988869	1	4	positive regulation of ryanodine-sensitive calcium-release channel activity	BP	Trdn
GO:0000279	0.166204		0.988162	1	5	M phase	BP	Xrcc5
GO:0031587	0.166387		0.990032	1	3	positive regulation of inositol 1,4,5-trisphosphate-sensitive calcium-release channel activity	BP	Hap1
GO:0046627	0.166476		0.949279	3	29	negative regulation of insulin receptor signaling pathway	BP	Nucb2, Irs1, Mstn
GO:0015501	0.166528		0.990015	1	3	glutamate:sodium symporter activity	MF	Slc1a2
GO:0002521	0.16664		0.88942	18	304	leukocyte differentiation	BP	Themis, Jun, Shb, Dock11, Stat3, Lgals8, Zfp608, H2-DMa, Cbfb, Bcl11a, Rassf2, Sh3pxd2a, Tmem178, Bcl2, Ctnnbip1, Sp3, Atp7a, Atp11c
GO:0042308	0.166655		0.937675	4	47	negative regulation of protein import into nucleus	BP	Fzd1, Pkia, Gsk3b, Chp1
GO:1904590	0.166655		0.937675	4	47	negative regulation of protein import	BP	Fzd1, Pkia, Gsk3b, Chp1
GO:0021824	0.167365		0.98991	1	3	cerebral cortex tangential migration using cell-axon interactions	BP	Nrp2
GO:0021828	0.167365		0.98991	1	3	gonadotrophin-releasing hormone neuronal migration to the hypothalamus	BP	Nrp2
GO:0021855	0.167365		0.98991	1	3	hypothalamus cell migration	BP	Nrp2
GO:0021856	0.167365		0.98991	1	3	hypothalamic tangential migration using cell-axon interactions	BP	Nrp2
GO:0061551	0.167365		0.98991	1	3	trigeminal ganglion development	BP	Nrp2
GO:1903375	0.167365		0.98991	1	3	facioacoustic ganglion development	BP	Nrp2
GO:0010727	0.167469		0.988691	1	4	negative regulation of hydrogen peroxide metabolic process	BP	Stat3
GO:0015837	0.167563		0.928537	5	68	amine transport	BP	Ghsr, Hrh3, Cnr1, Sv2a, Pcp4
GO:0070286	0.167779		0.964239	2	19	axonemal dynein complex assembly	BP	Dnah5, Zmynd10
GO:0051101	0.168105		0.921649	6	82	regulation of DNA binding	BP	Jun, Hipk1, Nfib, Ctnnbip1, Habp4, Runx1t1
4660	0.168388		0.92156	6	79	T cell receptor signaling pathway	KEGG	Vav2, Jun, Gsk3b, Pak3, Mapk9, Chp1
GO:0032106	0.168781		0.987777	1	5	positive regulation of response to extracellular stimulus	BP	Ghsr
GO:0032109	0.168781		0.987777	1	5	positive regulation of response to nutrient levels	BP	Ghsr
GO:0032355	0.169226		0.947688	3	33	response to estradiol	BP	Glrx, Stat3, Grn
GO:0010880	0.169303		0.964697	2	14	regulation of release of sequestered calcium ion into cytosol by sarcoplasmic reticulum	BP	Trdn, Ank2
GO:0021648	0.169304		0.989665	1	3	vestibulocochlear nerve morphogenesis	BP	Nrp2
GO:0035087	0.169337		0.988427	1	4	siRNA loading onto RISC involved in RNA interference	BP	Ago2
GO:0051575	0.16949		0.988406	1	4	5'-deoxyribose-5-phosphate lyase activity	MF	Xrcc5
GO:1901032	0.169517		0.96364	2	19	negative regulation of response to reactive oxygen species	BP	Glrx, Nup93
GO:1903206	0.169517		0.96364	2	19	negative regulation of hydrogen peroxide-induced cell death	BP	Glrx, Nup93
GO:1904738	0.169612		0.964886	2	13	vascular associated smooth muscle cell migration	BP	Dock5, Atp7a
GO:1904752	0.169612		0.964886	2	13	regulation of vascular associated smooth muscle cell migration	BP	Dock5, Atp7a
GO:1904754	0.169612		0.964886	2	13	positive regulation of vascular associated smooth muscle cell migration	BP	Dock5, Atp7a
GO:0048489	0.169931		0.910502	8	119	synaptic vesicle transport	BP	Ap3m2, Grn, Syt13, Cadps, Dnajc6, Prepl, Unc13c, Cplx2
GO:0097480	0.169931		0.910502	8	119	establishment of synaptic vesicle localization	BP	Ap3m2, Grn, Syt13, Cadps, Dnajc6, Prepl, Unc13c, Cplx2
GO:0048318	0.170392		0.987534	1	5	axial mesoderm development	BP	Poglut1
GO:0060612	0.170857		0.947125	3	31	adipose tissue development	BP	Arrdc3, Creb5, Ppargc1a
GO:0097252	0.170891		0.988205	1	4	oligodendrocyte apoptotic process	BP	Tnfrsf21
GO:0071472	0.171039		0.987435	1	5	cellular response to salt stress	BP	Xrcc5
GO:0015180	0.171149		0.988168	1	4	L-alanine transmembrane transporter activity	MF	Slc36a1
GO:0022858	0.171149		0.988168	1	4	alanine transmembrane transporter activity	MF	Slc36a1
GO:0098700	0.171604		0.988103	1	4	neurotransmitter loading into synaptic vesicle	BP	Slc17a6
GO:1904468	0.171681		0.987337	1	5	negative regulation of tumor necrosis factor secretion	BP	Ghsr
4260	0.171775		0.934473	4	60	Cardiac muscle contraction	KEGG	Cacng5, Cacnb4, Cacnb3, Slc9a6
GO:0000988	0.171957		0.879477	23	410	transcription factor activity, protein binding	MF	Zhx2, Jun, Hipk1, Tead1, Lmcd1, Nfib, Nacc2, Myt1l, Skil, Cbfb, Cys1, Bcl11a, Tfb2m, Ywhab, Bend6, Zhx1, Meis2, Med12l, Aip, Jazf1, Ppargc1a, Runx1t1, Bcor
GO:0072608	0.172735		0.987939	1	4	interleukin-10 secretion	BP	Tnfrsf21
GO:2001179	0.172735		0.987939	1	4	regulation of interleukin-10 secretion	BP	Tnfrsf21
GO:0033273	0.172906		0.962616	2	18	response to vitamin	BP	Hlcs, Postn
GO:0097155	0.173083		0.989177	1	3	fasciculation of sensory neuron axon	BP	Epha3
GO:0016778	0.173409		0.987071	1	5	diphosphotransferase activity	MF	Tpk1
GO:0072210	0.173437		0.962805	2	16	metanephric nephron development	BP	Ret, Kif26b
GO:0045948	0.173696		0.96234	2	18	positive regulation of translational initiation	BP	Habp4, Impact
GO:0061628	0.174006		0.989056	1	3	H3K27me3 modified histone binding	MF	Chd5
GO:0003150	0.174157		0.987731	1	4	muscular septum morphogenesis	BP	Fzd1
GO:0098762	0.174748		0.986862	1	5	meiotic cell cycle phase	BP	Xrcc5
GO:0098764	0.174748		0.986862	1	5	meiosis I cell cycle phase	BP	Xrcc5
GO:1904694	0.174789		0.988953	1	3	negative regulation of vascular smooth muscle contraction	BP	Dock5
GO:1990138	0.174852		0.900042	10	145	neuron projection extension	BP	Nrn1, Islr2, Flrt1, Nrp2, Bcl11a, Dscam, Gsk3b, Slc9a6, Impact, Postn
GO:0045922	0.174904		0.961916	2	18	negative regulation of fatty acid metabolic process	BP	Cnr1, Dbi
GO:0099003	0.175091		0.907102	8	120	vesicle-mediated transport in synapse	BP	Ap3m2, Grn, Syt13, Cadps, Dnajc6, Prepl, Unc13c, Cplx2
GO:0098519	0.175244		0.986785	1	5	nucleotide phosphatase activity, acting on free nucleotides	MF	Pdxp
561	0.175265		0.944946	3	33	Glycerolipid metabolism	KEGG	Aldh7a1, Aldh3a2, Aldh9a1
GO:0034614	0.17545		0.91144	7	107	cellular response to reactive oxygen species	BP	Gch1, Jun, Glrx, Nup93, Mapk9, Atp7a, Impact
GO:0003712	0.175529		0.879946	20	352	transcription cofactor activity	MF	Zhx2, Jun, Hipk1, Lmcd1, Nfib, Myt1l, Skil, Cbfb, Bcl11a, Tfb2m, Ywhab, Bend6, Zhx1, Meis2, Med12l, Aip, Jazf1, Ppargc1a, Runx1t1, Bcor
GO:0019852	0.176014		0.986664	1	5	L-ascorbic acid metabolic process	BP	Gclc
GO:0070059	0.176325		0.932393	4	52	intrinsic apoptotic signaling pathway in response to endoplasmic reticulum stress	BP	Wfs1, Gsk3b, Tmem117, Bcl2
GO:2000343	0.176973		0.98598	1	6	positive regulation of chemokine (C-X-C motif) ligand 2 production	BP	Postn
GO:1901617	0.177253		0.905553	8	128	organic hydroxy compound biosynthetic process	BP	Gch1, Spr, Mvk, Zeb2, Cyb5r3, Rapgef2, Atp7a, Sqle
GO:0002495	0.177377		0.985913	1	6	antigen processing and presentation of peptide antigen via MHC class II	BP	H2-DMa
GO:0008217	0.177688		0.910088	7	103	regulation of blood pressure	BP	Gch1, Hrh3, Cnr1, Ptpro, Wnk1, Atp6ap2, Postn
GO:0019216	0.177717		0.892131	12	206	regulation of lipid metabolic process	BP	Ghsr, Vav2, Cnr1, Bscl2, Nucb2, Dbi, Abhd5, Irs1, Mapk9, Ppargc1a, Acsl3, Ccdc3
GO:0048339	0.17777		0.961526	2	15	paraxial mesoderm development	BP	Tead1, Poglut1
GO:0033139	0.17777		0.987195	1	4	regulation of peptidyl-serine phosphorylation of STAT protein	BP	Ret
GO:0046883	0.177813		0.894818	11	176	regulation of hormone secretion	BP	Ghsr, Glrx, Cnr1, Anxa5, Ndufaf2, Hadh, Nucb2, Adcy5, Irs1, Kcnj11, Epha5
GO:0035336	0.178023		0.986345	1	5	long-chain fatty-acyl-CoA metabolic process	BP	Acot7
GO:0009235	0.178073		0.986337	1	5	cobalamin metabolic process	BP	Mmab
GO:0090261	0.178209		0.985776	1	6	positive regulation of inclusion body assembly	BP	Hap1
GO:0040014	0.178454		0.922395	5	66	regulation of multicellular organism growth	BP	Ghsr, Spr, Stat3, Atp8a2, Bcl2
GO:1903077	0.178505		0.96064	2	18	negative regulation of protein localization to plasma membrane	BP	Rhoq, Gopc
GO:0086017	0.178843		0.987033	1	4	Purkinje myocyte action potential	BP	Scn1b
GO:0044337	0.178863		0.988408	1	3	canonical Wnt signaling pathway involved in positive regulation of apoptotic process	BP	Gsk3b
GO:0042421	0.179008		0.987008	1	4	norepinephrine biosynthetic process	BP	Atp7a
GO:0010829	0.179167		0.960797	2	16	negative regulation of glucose transport	BP	Rhoq, Ahi1
GO:1990441	0.179304		0.986139	1	5	negative regulation of transcription from RNA polymerase II promoter in response to endoplasmic reticulum stress	BP	Jun
GO:0043552	0.179313		0.960745	2	16	positive regulation of phosphatidylinositol 3-kinase activity	BP	Vav2, Irs1
GO:0006041	0.179353		0.986956	1	4	glucosamine metabolic process	BP	Gnpda1
GO:0007195	0.179386		0.986951	1	4	adenylate cyclase-inhibiting dopamine receptor signaling pathway	BP	Adcy5
GO:0102991	0.179595		0.985545	1	6	myristoyl-CoA hydrolase activity	MF	Acot7
GO:0042483	0.179674		0.988298	1	3	negative regulation of odontogenesis	BP	Bcor
GO:2000675	0.179884		0.986046	1	5	negative regulation of type B pancreatic cell apoptotic process	BP	Wfs1
GO:0023051	0.179959		0.848114	104	2101	regulation of signaling	BP	Sostdc1, Cacng5, Ghsr, Peg10, Rgs13, Rspo3, Pcdh17, Osbpl8, Cntn2, Fzd1, Sla, Ly6g6e, Hap1, Kcnc4, Arrdc3, Vav2, Optn, Fbxo9, Jun, Sipa1l2, Glrx, Hipk1, Dusp16, Nxn, Lmcd1, Tcp11, Lama2, Ppp2r1b, Wfs1, Trdn, Rgs5, Nup93, Olfm4, Stat3, Lgi1, Scel, Nacc2, Tgfb3, Cnr1, Ret, Anxa5, Ndfip2, Nr2e1, Flrt1, Faim2, Ndufaf2, Hadh, Nucb2, Pde10a, Skil, Ubqln2, Ptpro, Dbi, Trp53inp1, Frrs1l, Zeb2, Rassf2, Gs…
GO:0051279	0.179988		0.930714	4	47	regulation of release of sequestered calcium ion into cytosol	BP	Hap1, Trdn, Dbi, Ank2
GO:1901569	0.180175		0.985999	1	5	fatty acid derivative catabolic process	BP	Acot7
GO:0071494	0.180275		0.985983	1	5	cellular response to UV-C	BP	Impact
GO:0042997	0.180344		0.985971	1	5	negative regulation of Golgi to plasma membrane protein transport	BP	Gopc
GO:0005540	0.1804		0.960359	2	16	hyaluronic acid binding	MF	Habp4, Layn
GO:1901798	0.180503		0.959758	2	19	positive regulation of signal transduction by p53 class mediator	BP	Chd5, Spred2
GO:0035092	0.180532		0.986776	1	4	sperm chromatin condensation	BP	Chd5
GO:0002029	0.180543		0.959744	2	19	desensitization of G-protein coupled receptor protein signaling pathway	BP	Ly6g6e, Ubqln2
GO:0022401	0.180543		0.959744	2	19	negative adaptation of signaling pathway	BP	Ly6g6e, Ubqln2
GO:0032094	0.180768		0.959379	2	21	response to food	BP	Ghsr, Nucb2
GO:2000021	0.180865		0.899277	9	134	regulation of ion homeostasis	BP	Hap1, Trdn, Dbi, Scn1b, Ank2, Bcl2, Mllt11, Gclc, Ryr1
750	0.180895		0.985882	1	5	Vitamin B6 metabolism	KEGG	Pdxp
GO:0071787	0.180951		0.986712	1	4	endoplasmic reticulum tubular network formation	BP	Rtn3
GO:0034220	0.180997		0.86709	29	537	ion transmembrane transport	BP	Cacng5, Hap1, Kcnc4, Stim1, Glrx, Slc9a9, Trdn, Cacnb4, Clcn3, Cacnb3, Fam155a, Mcur1, Slc1a2, Dbi, Kcna3, Scn1b, Ank2, Kcnk10, Slc9a6, Slc8a3, Micu2, Gabrg2, Kcnj11, Ppargc1a, Atp7a, Kcnj16, Gopc, Chp1, Ryr1
GO:0051881	0.1812		0.92959	4	57	regulation of mitochondrial membrane potential	BP	Gsk3b, Bcl2, Mllt11, Gclc
860	0.181308		0.95906	2	22	Porphyrin and chlorophyll metabolism	KEGG	Mmab, Uros
GO:0019932	0.181545		0.892223	11	170	second-messenger-mediated signaling	BP	Hap1, Lmcd1, Tcp11, Trdn, Pde10a, Adcy5, Ank2, Rcan1, Rapgef2, Epha5, Chp1
GO:0031620	0.181631		0.986608	1	4	regulation of fever generation	BP	Cnr1
GO:2000580	0.18174		0.985744	1	5	regulation of ATP-dependent microtubule motor activity, plus-end-directed	BP	Dynll2
GO:2000582	0.18174		0.985744	1	5	positive regulation of ATP-dependent microtubule motor activity, plus-end-directed	BP	Dynll2
GO:0048814	0.181958		0.90755	7	94	regulation of dendrite morphogenesis	BP	Kndc1, Nr2e1, Gsk3b, Pak3, Sdc2, Rapgef2, Stau2
GO:0046037	0.182201		0.985105	1	6	GMP metabolic process	BP	Hprt
GO:0045445	0.182204		0.929422	4	49	myoblast differentiation	BP	Sostdc1, Flot2, Nr2c2, Mstn
GO:0038171	0.182537		0.986468	1	4	cannabinoid signaling pathway	BP	Cnr1
GO:0045852	0.182569		0.986463	1	4	pH elevation	BP	Bcl2
GO:0051454	0.182569		0.986463	1	4	intracellular pH elevation	BP	Bcl2
GO:0060235	0.182606		0.986457	1	4	lens induction in camera-type eye	BP	Hipk1
GO:1990748	0.182735		0.958798	2	20	cellular detoxification	BP	Gch1, Atp7a
GO:0031122	0.182737		0.929442	4	44	cytoplasmic microtubule organization	BP	Trdn, Dst, Cep120, Chp1
GO:2000622	0.182949		0.986404	1	4	regulation of nuclear-transcribed mRNA catabolic process, nonsense-mediated decay	BP	Nbas
GO:2000623	0.182949		0.986404	1	4	negative regulation of nuclear-transcribed mRNA catabolic process, nonsense-mediated decay	BP	Nbas
GO:0072093	0.182996		0.98784	1	3	metanephric renal vesicle formation	BP	Kif26b
GO:0010646	0.183033		0.845456	103	2080	regulation of cell communication	BP	Sostdc1, Cacng5, Ghsr, Peg10, Rgs13, Rspo3, Pcdh17, Osbpl8, Cntn2, Fzd1, Sla, Ly6g6e, Hap1, Kcnc4, Arrdc3, Vav2, Optn, Fbxo9, Jun, Sipa1l2, Glrx, Hipk1, Dusp16, Nxn, Lmcd1, Tcp11, Lama2, Ppp2r1b, Wfs1, Trdn, Rgs5, Nup93, Olfm4, Stat3, Lgi1, Scel, Nacc2, Tgfb3, Cnr1, Ret, Anxa5, Ndfip2, Nr2e1, Flrt1, Faim2, Ndufaf2, Hadh, Nucb2, Pde10a, Skil, Ubqln2, Ptpro, Dbi, Trp53inp1, Frrs1l, Zeb2, Rassf2, Gs…
GO:0001881	0.183116		0.941309	3	33	receptor recycling	BP	Optn, Inpp5f, Nsf
GO:0004860	0.183426		0.919279	5	73	protein kinase inhibitor activity	MF	Flrt1, Pkia, Wnk1, Spred2, Chp1
GO:2000015	0.183531		0.98545	1	5	regulation of determination of dorsal identity	BP	Sostdc1
GO:0060216	0.183635		0.959447	2	15	definitive hemopoiesis	BP	Cbfb, Sp3
GO:0051480	0.183691		0.887907	12	193	regulation of cytosolic calcium ion concentration	BP	Hap1, Hrh3, Trdn, Cacnb3, Fam155a, Dbi, Adcy5, Ank2, Tmem178, Slc8a3, Bcl2, Ryr1
GO:0014823	0.183778		0.959396	2	15	response to activity	BP	Hadh, Ppargc1a
GO:0048863	0.183883		0.901414	8	112	stem cell differentiation	BP	Fzd1, Stat3, Ret, Xrcc5, Nrp2, Gpm6a, Zeb2, Gsk3b
GO:0051648	0.184042		0.887688	12	189	vesicle localization	BP	Pcdh17, Hap1, Ap3m2, Wipi1, Ahi1, Grn, Syt13, Cadps, Dnajc6, Prepl, Unc13c, Cplx2
GO:0046058	0.184113		0.911873	6	83	cAMP metabolic process	BP	Hrh3, Wfs1, Cacnb4, Nucb2, Pde10a, Adcy5
GO:0090521	0.184343		0.986187	1	4	glomerular visceral epithelial cell migration	BP	Nup93
GO:0001661	0.184383		0.98618	1	4	conditioned taste aversion	BP	Tbr1
GO:0000320	0.184567		0.986152	1	4	re-entry into mitotic cell cycle	BP	Gsk3b
GO:0002768	0.184626		0.911501	6	85	immune response-regulating cell surface receptor signaling pathway	BP	Themis, Shb, Cacnb4, Cacnb3, Bcl2, Tnfrsf21
GO:0045109	0.18463		0.958623	2	17	intermediate filament organization	BP	Nefm, Tchh
GO:0051791	0.184652		0.985264	1	5	medium-chain fatty acid metabolic process	BP	Acot7
GO:0005131	0.184853		0.986107	1	4	growth hormone receptor binding	MF	Jak1
GO:0004065	0.185515		0.986003	1	4	arylsulfatase activity	MF	Arsb
GO:0086006	0.18562		0.985986	1	4	voltage-gated sodium channel activity involved in cardiac muscle cell action potential	MF	Scn1b
GO:0046323	0.185898		0.918148	5	64	glucose import	BP	Rhoq, Osbpl8, Ahi1, Slc1a2, Irs1
GO:0015077	0.186091		0.883575	13	228	monovalent inorganic cation transmembrane transporter activity	MF	Kcnc4, Slc4a8, Slc9a9, Slc1a2, Kcna3, Scn1b, Kcnk10, Slc9a6, Slc8a3, Atp6v1g2, Kcnj11, Kcnj16, Slc36a1
GO:0048403	0.186093		0.985911	1	4	brain-derived neurotrophic factor binding	MF	Hap1
GO:0006000	0.186124		0.984429	1	6	fructose metabolic process	BP	Gnpda1
GO:0051572	0.186436		0.985857	1	4	negative regulation of histone H3-K4 methylation	BP	Bcor
GO:0021886	0.186915		0.985781	1	4	hypothalamus gonadotrophin-releasing hormone neuron differentiation	BP	Nrp2
GO:0021888	0.186915		0.985781	1	4	hypothalamus gonadotrophin-releasing hormone neuron development	BP	Nrp2
GO:0032237	0.187226		0.985731	1	4	activation of store-operated calcium channel activity	BP	Stim1
GO:1901341	0.187226		0.985731	1	4	positive regulation of store-operated calcium channel activity	BP	Stim1
GO:1901857	0.187679		0.984157	1	6	positive regulation of cellular respiration	BP	Ppargc1a
GO:0032228	0.187876		0.939159	3	32	regulation of synaptic transmission, GABAergic	BP	Hap1, Cnr1, Dbi
GO:1900077	0.187964		0.939218	3	31	negative regulation of cellular response to insulin stimulus	BP	Nucb2, Irs1, Mstn
GO:0097501	0.18812		0.984079	1	6	stress response to metal ion	BP	Atp7a
GO:0070475	0.188374		0.984034	1	6	rRNA base methylation	BP	Mettl15
GO:1901567	0.188451		0.956417	2	22	fatty acid derivative binding	MF	Acot7, Dbi
GO:0048536	0.18852		0.939179	3	29	spleen development	BP	Cacnb4, Bcl2, Pbx1
GO:0051591	0.188594		0.926165	4	46	response to cAMP	BP	Jun, Cdo1, Slc8a3, Rapgef2
GO:0000150	0.188838		0.984558	1	5	recombinase activity	MF	Rad51d
GO:0048069	0.188968		0.984536	1	5	eye pigmentation	BP	Atp6ap2
GO:0070459	0.18927		0.984485	1	5	prolactin secretion	BP	Anxa5
GO:0051650	0.189287		0.88663	11	174	establishment of vesicle localization	BP	Hap1, Ap3m2, Wipi1, Ahi1, Grn, Syt13, Cadps, Dnajc6, Prepl, Unc13c, Cplx2
GO:0048747	0.18963		0.925739	4	44	muscle fiber development	BP	Cacnb4, Rcan1, Bcl2, Ryr1
GO:0060689	0.189959		0.985292	1	4	cell differentiation involved in salivary gland development	BP	Nfib
GO:0055085	0.190134		0.854489	37	721	transmembrane transport	BP	Cacng5, Hap1, Slc43a2, Kcnc4, Stim1, Tap1, Glrx, Slc9a9, Trdn, Slc16a6, Cacnb4, Clcn3, Slc17a8, Cacnb3, Fam155a, Slc18b1, Mcur1, Slc1a2, Dbi, Kcna3, Sv2a, Scn1b, Ank2, Kcnk10, Slc9a6, Slc8a3, Micu2, Bcl2, Gabrg2, Kcnj11, Ppargc1a, Slc17a6, Atp7a, Kcnj16, Gopc, Chp1, Ryr1
GO:0044339	0.19018		0.985257	1	4	canonical Wnt signaling pathway involved in osteoblast differentiation	BP	Fzd1
GO:0045776	0.190229		0.937853	3	34	negative regulation of blood pressure	BP	Gch1, Hrh3, Cnr1
GO:0060355	0.190509		0.984272	1	5	positive regulation of cell adhesion molecule production	BP	Glrx
GO:0061635	0.190509		0.983654	1	6	regulation of protein complex stability	BP	Tapbp
GO:0004030	0.190785		0.984224	1	5	aldehyde dehydrogenase [NAD(P)+] activity	MF	Aldh3a2
GO:0001101	0.191196		0.888423	10	158	response to acid chemical	BP	Hlcs, Tead1, Ret, Cdo1, Slc1a2, Neurl1a, Lancl2, Bcl2, Epha3, Atp7a
GO:0044106	0.191232		0.924245	4	55	cellular amine metabolic process	BP	Hprt, Gde1, Atp7a, Odc1
GO:0007156	0.19129		0.907815	6	71	homophilic cell adhesion via plasma membrane adhesion molecules	BP	Pcdh8, Kirrel3, Ret, Cadm2, Igsf9b, Pcdhgc3
GO:0023058	0.191339		0.955609	2	20	adaptation of signaling pathway	BP	Ly6g6e, Ubqln2
GO:0043271	0.191364		0.901185	7	106	negative regulation of ion transport	BP	Hrh3, Trdn, Cnr1, Wnk1, Bcl2, Atp7a, Gopc
GO:0060283	0.191392		0.984119	1	5	negative regulation of oocyte development	BP	Shb
GO:1905880	0.191392		0.984119	1	5	negative regulation of oogenesis	BP	Shb
GO:0005544	0.192338		0.936755	3	35	calcium-dependent phospholipid binding	MF	Anxa5, Syt13, Anxa3
GO:0034379	0.192541		0.983919	1	5	very-low-density lipoprotein particle assembly	BP	Acsl3
GO:0008093	0.193074		0.984783	1	4	cytoskeletal adaptor activity	MF	Ank1
GO:2000637	0.193365		0.955399	2	17	positive regulation of gene silencing by miRNA	BP	Stat3, Ago2
GO:0032306	0.193382		0.983772	1	5	regulation of prostaglandin secretion	BP	Mapk9
GO:0018209	0.193581		0.873811	15	244	peptidyl-serine modification	BP	Dclk3, Myo3b, Stk32b, Ret, Smyd3, Rassf2, Gsk3b, Nek6, Inpp5f, Bcl2, Poglut1, Mapk9, Stk38l, Naa11, Mast4
GO:0001784	0.193653		0.936398	3	32	phosphotyrosine residue binding	MF	Vav2, Shb, Irs1
GO:0071875	0.193734		0.955261	2	17	adrenergic receptor signaling pathway	BP	Arrdc3, Rapgef2
GO:1902991	0.193766		0.954857	2	19	regulation of amyloid precursor protein catabolic process	BP	Hap1, Flot2
GO:0055065	0.193813		0.864246	21	379	metal ion homeostasis	BP	Hap1, Stim1, Hrh3, Wfs1, Trdn, Ank1, Cacnb4, Cacnb3, Fam155a, Nucb2, Mcur1, Dbi, Sv2a, Adcy5, Ank2, Tmem178, Slc8a3, Micu2, Bcl2, Atp7a, Ryr1
GO:0071824	0.1939		0.889811	9	174	protein-DNA complex subunit organization	BP	Nap1l5, Rad51d, Hist1h1a, Smyd3, Anp32e, Chd5, Tspyl4, Hist2h2bb, Nap1l2
GO:0000707	0.19427		0.983616	1	5	meiotic DNA recombinase assembly	BP	Rad51d
GO:0006333	0.194419		0.898825	7	127	chromatin assembly or disassembly	BP	Nap1l5, Hist1h1a, Smyd3, Anp32e, Tspyl4, Hist2h2bb, Nap1l2
GO:0007411	0.19463		0.886155	10	145	axon guidance	BP	Cntn2, Nfib, Lama2, Lgi1, Tbr1, Nrp2, Ptpro, Dscam, Scn1b, Epha5
GO:0003254	0.194946		0.935774	3	32	regulation of membrane depolarization	BP	Scn1b, Mllt11, Gclc
GO:0021700	0.195085		0.879592	12	190	developmental maturation	BP	Cntn2, Tcp11, Shb, Ret, Clcn3, Cbfb, Nfia, Bcl11a, Gsk3b, Neurl1a, Bcl2, Ryr1
GO:0007601	0.195364		0.912398	5	68	visual perception	BP	Myo3b, Wfs1, Cacnb4, Nr2e1, Atp8a2
GO:0001767	0.195587		0.984365	1	4	establishment of lymphocyte polarity	BP	Flot2
GO:0001768	0.195587		0.984365	1	4	establishment of T cell polarity	BP	Flot2
GO:0008553	0.195766		0.981619	1	9	hydrogen-exporting ATPase activity, phosphorylative mechanism	MF	Atp6v1g2
GO:0016079	0.195862		0.912139	5	67	synaptic vesicle exocytosis	BP	Syt13, Cadps, Prepl, Unc13c, Cplx2
GO:0031146	0.196066		0.953662	2	21	SCF-dependent proteasomal ubiquitin-dependent protein catabolic process	BP	Fbxo2, Fbxo9
GO:0031392	0.196088		0.983294	1	5	regulation of prostaglandin biosynthetic process	BP	Mapk9
GO:2001279	0.196088		0.983294	1	5	regulation of unsaturated fatty acid biosynthetic process	BP	Mapk9
GO:0006750	0.196197		0.982619	1	6	glutathione biosynthetic process	BP	Gclc
GO:0048167	0.196251		0.881623	11	171	regulation of synaptic plasticity	BP	Cntn2, Nr2e1, Dbi, Gsk3b, Neurl1a, Slc8a3, Rapgef2, Unc13c, Stau2, Mpp2, Cplx2
GO:0071440	0.196488		0.983222	1	5	regulation of histone H3-K14 acetylation	BP	Nap1l2
GO:0038179	0.196627		0.93486	3	33	neurotrophin signaling pathway	BP	Hap1, Slc9a6, Rapgef2
GO:0002295	0.196825		0.984157	1	4	T-helper cell lineage commitment	BP	Stat3
GO:0043373	0.196825		0.984157	1	4	CD4-positive, alpha-beta T cell lineage commitment	BP	Stat3
GO:0035608	0.196946		0.983141	1	5	protein deglutamylation	BP	Agbl4
GO:0004128	0.197036		0.982464	1	6	cytochrome-b5 reductase activity, acting on NAD(P)H	MF	Cyb5r3
GO:0046666	0.197119		0.983109	1	5	retinal cell programmed cell death	BP	Bcl2
GO:1904347	0.197232		0.983089	1	5	regulation of small intestine smooth muscle contraction	BP	Ghsr
GO:1990770	0.197232		0.983089	1	5	small intestine smooth muscle contraction	BP	Ghsr
GO:0004983	0.197858		0.982977	1	5	neuropeptide Y receptor activity	MF	Prokr2
GO:2000253	0.198005		0.98295	1	5	positive regulation of feeding behavior	BP	Ghsr
GO:1901654	0.198191		0.910744	5	67	response to ketone	BP	Tgfb3, Smyd3, Adcy5, Epha5, Mstn
GO:0030072	0.198824		0.879685	11	177	peptide hormone secretion	BP	Ghsr, Glrx, Cnr1, Anxa5, Ndufaf2, Hadh, Nucb2, Adcy5, Irs1, Kcnj11, Epha5
GO:0000184	0.19893		0.933641	3	34	nuclear-transcribed mRNA catabolic process, nonsense-mediated decay	BP	Nbas, Pnrc2, Pnrc1
GO:2000507	0.199186		0.982737	1	5	positive regulation of energy homeostasis	BP	Ppargc1a
GO:0007258	0.199539		0.983696	1	4	JUN phosphorylation	BP	Mapk9
GO:0002326	0.199901		0.983634	1	4	B cell lineage commitment	BP	Bcl2
GO:0070166	0.199998		0.983617	1	4	enamel mineralization	BP	Stim1
GO:0050774	0.200112		0.952839	2	17	negative regulation of dendrite morphogenesis	BP	Gsk3b, Rapgef2
GO:0072674	0.200294		0.983566	1	4	multinuclear osteoclast differentiation	BP	Sh3pxd2a
GO:0072675	0.200294		0.983566	1	4	osteoclast fusion	BP	Sh3pxd2a
GO:0019210	0.20044		0.909108	5	75	kinase inhibitor activity	MF	Flrt1, Pkia, Wnk1, Spred2, Chp1
GO:0005230	0.200459		0.919349	4	51	extracellular ligand-gated ion channel activity	MF	Gabrq, Gabra3, Chrna1, Gabrg2
GO:0045182	0.200958		0.932388	3	37	translation regulator activity	MF	Samd4, Neurl1a, Ago2
GO:0032528	0.201131		0.952448	2	17	microvillus organization	BP	Rapgef6, Rapgef2
GO:0019935	0.201238		0.90891	5	67	cyclic-nucleotide-mediated signaling	BP	Tcp11, Pde10a, Adcy5, Rapgef2, Epha5
GO:0030148	0.201576		0.918618	4	53	sphingolipid biosynthetic process	BP	Elovl2, Elovl4, Kdsr, Elovl6
GO:0000978	0.201587		0.867594	15	256	RNA polymerase II core promoter proximal region sequence-specific DNA binding	MF	Jun, Tead1, Nfib, Stat3, Nacc2, Skil, Nfia, Cys1, Bcl11a, Nkrf, Meis2, Neurod6, Nr2c2, Rfx5, Pbx1
GO:0033673	0.201613		0.877535	11	188	negative regulation of kinase activity	BP	Dusp16, Shb, Flrt1, Smyd3, Pkia, Wnk1, Gsk3b, Spred2, Mstn, Pcp4, Chp1
GO:0001754	0.201621		0.93252	3	32	eye photoreceptor cell differentiation	BP	Stat3, Crb1, Ahi1
GO:0001162	0.201741		0.98227	1	5	RNA polymerase II intronic transcription regulatory region sequence-specific DNA binding	MF	Smyd3
GO:1901186	0.201858		0.952167	2	17	positive regulation of ERBB signaling pathway	BP	Hap1, Neurl1a
GO:0032845	0.202053		0.884445	9	143	negative regulation of homeostatic process	BP	Hap1, Arrdc3, Trdn, Xrcc5, Ndufaf2, Dbi, Ank2, Bcl2, Ryr1
GO:0000981	0.20212		0.852212	26	468	RNA polymerase II transcription factor activity, sequence-specific DNA binding	MF	Jun, Tead1, Nfib, Stat3, Nacc2, Myt1l, Creb5, Nr2e1, Stag1, Zbtb20, Camta1, Skil, Nfia, Cys1, Bcl11a, Zeb2, Nkrf, Meis2, Neurod6, Cggbp1, Klf12, Taf9b, Sp3, Nr2c2, Tshz1, Pbx1
GO:0002335	0.20264		0.951643	2	18	mature B cell differentiation	BP	Dock11, Lgals8
GO:1902307	0.202689		0.951624	2	18	positive regulation of sodium ion transmembrane transport	BP	Glrx, Chp1
GO:0090218	0.202951		0.951523	2	18	positive regulation of lipid kinase activity	BP	Vav2, Irs1
GO:1900078	0.203179		0.951908	2	16	positive regulation of cellular response to insulin stimulus	BP	Osbpl8, Irs1
GO:0019871	0.203282		0.981985	1	5	sodium channel inhibitor activity	MF	Scn1b
GO:0021796	0.203379		0.981263	1	6	cerebral cortex regionalization	BP	Emx2
GO:0032905	0.203438		0.981956	1	5	transforming growth factor beta1 production	BP	Atp6ap2
GO:0032908	0.203438		0.981956	1	5	regulation of transforming growth factor beta1 production	BP	Atp6ap2
GO:0004706	0.203507		0.983008	1	4	JUN kinase kinase kinase activity	MF	Map3k9
GO:2001239	0.203949		0.931075	3	35	regulation of extrinsic apoptotic signaling pathway in absence of ligand	BP	Ppp2r1b, Ret, Bcl2
GO:0000305	0.20426		0.950812	2	19	response to oxygen radical	BP	Gch1, Atp7a
GO:0007191	0.204724		0.981716	1	5	adenylate cyclase-activating dopamine receptor signaling pathway	BP	Adcy5
GO:0051234	0.204859		0.822031	150	3223	establishment of localization	BP	Cacng5, Ghsr, Rhoq, Nefm, Pcdh17, Osbpl8, Txnip, Cntn2, Fzd1, Hap1, Nipal3, Slc43a2, Rab3d, Ap3m2, Kcnc4, Ccdc91, Hist1h1a, Slc4a8, Stim1, Optn, Tap1, Hrh3, Jun, Glrx, Gabrq, Slc9a9, Trpm3, Pitpnm3, Wfs1, Trdn, Cenpf, Stam2, Vamp1, Ank1, Tacc1, Nup93, Arl4c, Stat3, Tmem184c, Tgfb3, Cnr1, Mmgt1, Wipi1, Aifm3, Dynll2, Ifi27, Anxa5, Slc16a6, Cacnb4, Ndfip2, Nbas, Slco5a1, Tgoln1, Ahi1, Cdo1, Ndufaf2…
GO:0006591	0.20491		0.980966	1	6	ornithine metabolic process	BP	Odc1
GO:0002716	0.20501		0.980947	1	6	negative regulation of natural killer cell mediated immunity	BP	Tap1
GO:0045953	0.20501		0.980947	1	6	negative regulation of natural killer cell mediated cytotoxicity	BP	Tap1
GO:0097485	0.205088		0.878632	10	147	neuron projection guidance	BP	Cntn2, Nfib, Lama2, Lgi1, Tbr1, Nrp2, Ptpro, Dscam, Scn1b, Epha5
GO:0016191	0.205307		0.981607	1	5	synaptic vesicle uncoating	BP	Dnajc6
GO:0035290	0.205614		0.982636	1	4	trunk segmentation	BP	Nrp2
GO:0036484	0.205614		0.982636	1	4	trunk neural crest cell migration	BP	Nrp2
GO:0036486	0.205614		0.982636	1	4	ventral trunk neural crest cell migration	BP	Nrp2
GO:0097490	0.205614		0.982636	1	4	sympathetic neuron projection extension	BP	Nrp2
GO:0097491	0.205614		0.982636	1	4	sympathetic neuron projection guidance	BP	Nrp2
GO:0045915	0.205766		0.980799	1	6	positive regulation of catecholamine metabolic process	BP	Hprt
GO:0045964	0.205766		0.980799	1	6	positive regulation of dopamine metabolic process	BP	Hprt
GO:0061687	0.206069		0.98074	1	6	detoxification of inorganic compound	BP	Atp7a
GO:0072539	0.206212		0.981436	1	5	T-helper 17 cell differentiation	BP	Stat3
GO:0061550	0.206237		0.982526	1	4	cranial ganglion development	BP	Nrp2
GO:0031690	0.206484		0.949936	2	19	adrenergic receptor binding	MF	Arrdc3, Rapgef2
GO:0051004	0.206769		0.980603	1	6	regulation of lipoprotein lipase activity	BP	Abhd5
GO:0070777	0.207202		0.982353	1	4	D-aspartate transport	BP	Slc1a2
GO:0070779	0.207202		0.982353	1	4	D-aspartate import	BP	Slc1a2
GO:0021853	0.207274		0.981235	1	5	cerebral cortex GABAergic interneuron migration	BP	Cntn2
GO:1904936	0.207274		0.981235	1	5	interneuron migration	BP	Cntn2
GO:0060353	0.20728		0.980502	1	6	regulation of cell adhesion molecule production	BP	Glrx
GO:0003148	0.207409		0.950263	2	16	outflow tract septum morphogenesis	BP	Nrp2, Parva
GO:0060041	0.207497		0.890633	7	100	retina development in camera-type eye	BP	Hipk1, Nr2e1, Ahi1, Gpm6a, Dscam, Atp8a2, Ttll5
GO:0021696	0.20776		0.92959	3	31	cerebellar cortex morphogenesis	BP	Kndc1, Faim2, Atp7a
GO:0010803	0.207962		0.949167	2	20	regulation of tumor necrosis factor-mediated signaling pathway	BP	Hipk1, Ccdc3
GO:0021747	0.208546		0.982112	1	4	cochlear nucleus development	BP	Bcl2
GO:2001235	0.208711		0.884103	8	136	positive regulation of apoptotic signaling pathway	BP	Ppp2r1b, Nacc2, Ret, Skil, Trp53inp1, Gsk3b, Mllt11, Mapk9
GO:0007389	0.208845		0.860031	16	269	pattern specification process	BP	Sostdc1, Pcdh8, Hipk1, Tbr1, Ahi1, Nrp2, Dnah5, Zeb2, Dpcd, Ctnnbip1, Poglut1, Atp6ap2, Tshz1, Pbx1, Emx2, Bcor
GO:0043174	0.209377		0.979158	1	8	nucleoside salvage	BP	Hprt
GO:0010876	0.209424		0.868806	12	203	lipid localization	BP	Osbpl8, Bscl2, Nucb2, Atp8a2, Npc2, Abhd5, Osbpl2, Osbpl9, Mapk9, Acsl3, Lrp10, Atp11c
GO:0001884	0.209447		0.98082	1	5	pyrimidine nucleoside binding	MF	Dck
GO:0099541	0.209713		0.981901	1	4	trans-synaptic signaling by lipid	BP	Cnr1
GO:0099542	0.209713		0.981901	1	4	trans-synaptic signaling by endocannabinoid	BP	Cnr1
GO:0032370	0.21049		0.927621	3	37	positive regulation of lipid transport	BP	Nucb2, Atp8a2, Mapk9
GO:0070273	0.210507		0.948544	2	18	phosphatidylinositol-4-phosphate binding	MF	Osbpl8, Lancl2
GO:0034969	0.210527		0.979857	1	6	histone arginine methylation	BP	Coprs
GO:0015193	0.210566		0.980605	1	5	L-proline transmembrane transporter activity	MF	Slc36a1
GO:0008381	0.210569		0.979848	1	6	mechanically-gated ion channel activity	MF	Fam155a
GO:0022833	0.210569		0.979848	1	6	mechanically gated channel activity	MF	Fam155a
GO:0006887	0.210851		0.862628	14	237	exocytosis	BP	Hap1, Rab3d, Glrx, Vamp1, Syt13, Scamp1, Cadps, Scrn1, Prepl, Unc13c, Cplx2, Anxa3, Nsf, Chp1
GO:0016247	0.210878		0.894567	6	96	channel regulator activity	MF	Cacng5, Stim1, Wnk1, Scn1b, Ank2, Bcl2
GO:1904376	0.211112		0.947904	2	20	negative regulation of protein localization to cell periphery	BP	Rhoq, Gopc
GO:0060148	0.211116		0.9483	2	18	positive regulation of posttranscriptional gene silencing	BP	Stat3, Ago2
GO:0071800	0.211122		0.948298	2	18	podosome assembly	BP	Sh3pxd2a, Mapk9
GO:0015816	0.211314		0.98046	1	5	glycine transport	BP	Slc36a1
GO:0004602	0.211384		0.978173	1	10	glutathione peroxidase activity	MF	Gpx8
GO:0006701	0.211507		0.980422	1	5	progesterone biosynthetic process	BP	Ppargc1a
GO:0071804	0.211568		0.882349	8	122	cellular potassium ion transport	BP	Kcnc4, Slc9a9, Kcna3, Ank2, Kcnk10, Slc9a6, Kcnj11, Kcnj16
GO:0071805	0.211568		0.882349	8	122	potassium ion transmembrane transport	BP	Kcnc4, Slc9a9, Kcna3, Ank2, Kcnk10, Slc9a6, Kcnj11, Kcnj16
GO:0010454	0.212039		0.979552	1	6	negative regulation of cell fate commitment	BP	Sostdc1
GO:0009653	0.212057		0.820775	91	1760	anatomical structure morphogenesis	BP	Sostdc1, Ghsr, Rhoq, Rspo3, Nyap2, Nefm, Nrn1, Pcdh8, Cntn2, Fzd1, Spr, Plxnc1, Vav2, Stim1, Islr2, Jun, Ust, Hipk1, Tead1, Kirrel3, Myo3b, Nfib, Lama2, Ppp2r1b, Kndc1, Shb, Olfm4, Stat3, Lgi1, Tgfb3, Tbr1, Ret, Nr2e1, Flrt1, Crb1, Faim2, Lifr, Hprt, Ahi1, Nrp2, Parva, Lgals8, Gpm6a, H2-DMa, Skil, Ptpro, Fermt2, Dst, Cdc42ep2, Col8a1, Bcl11a, Zeb2, Dscam, Atp8a2, Gsk3b, Uchl5, Scn1b, Sh3pxd2a, Ma…
GO:0070669	0.212255		0.980276	1	5	response to interleukin-2	BP	Jak1
GO:0019752	0.212351		0.842633	27	566	carboxylic acid metabolic process	BP	Lars2, Ghsr, Gch1, Cryl1, Spr, Stat3, Cnr1, Cdo1, Hadh, Nucb2, Elovl2, Acot7, Dbi, Elovl4, Hibadh, Abhd5, Irs1, Uros, Habp4, Mapk9, Ppargc1a, Acsl3, Gclc, Atp7a, Elovl6, Odc1, Aldh4a1
GO:0098900	0.212373		0.912881	4	47	regulation of action potential	BP	Kcnc4, Cnr1, Cacnb3, Ank2
GO:0090273	0.212387		0.981412	1	4	regulation of somatostatin secretion	BP	Irs1
GO:0004252	0.212407		0.912149	4	60	serine-type endopeptidase activity	MF	Clpp, Plat, Masp1, Prepl
GO:0009166	0.21245		0.926256	3	42	nucleotide catabolic process	BP	Hprt, Pde10a, Enpp5
GO:0003002	0.21247		0.863879	13	212	regionalization	BP	Sostdc1, Pcdh8, Hipk1, Tbr1, Nrp2, Zeb2, Dpcd, Ctnnbip1, Poglut1, Atp6ap2, Tshz1, Pbx1, Emx2
GO:0099011	0.212773		0.981341	1	4	neuronal dense core vesicle exocytosis	BP	Cadps
GO:0099525	0.212773		0.981341	1	4	presynaptic dense core vesicle exocytosis	BP	Cadps
GO:0035733	0.213355		0.979285	1	6	hepatic stellate cell activation	BP	Gclc
GO:2000489	0.213355		0.979285	1	6	regulation of hepatic stellate cell activation	BP	Gclc
GO:0061326	0.213454		0.901539	5	65	renal tubule development	BP	Ahi1, Bcl2, Ctnnbip1, Pbx1, Kif26b
GO:0000289	0.213483		0.947589	2	17	nuclear-transcribed mRNA poly(A) tail shortening	BP	Samd4, Ago2
GO:2001256	0.213957		0.979943	1	5	regulation of store-operated calcium entry	BP	Stim1
GO:0042805	0.213994		0.926718	3	29	actinin binding	MF	Magi1, Ldb3, Lmo7
GO:0001660	0.214083		0.979918	1	5	fever generation	BP	Cnr1
GO:0060090	0.214506		0.885721	7	108	molecular adaptor activity	MF	Sla, Optn, Shb, Ank1, Tchh, Ank2, Irs1
GO:0033085	0.214639		0.979022	1	6	negative regulation of T cell differentiation in thymus	BP	Zfp608
GO:0043367	0.214729		0.925744	3	34	CD4-positive, alpha-beta T cell differentiation	BP	Shb, Stat3, Atp7a
GO:0031396	0.215152		0.870973	10	174	regulation of protein ubiquitination	BP	Rassf5, Fbxo2, Arrdc3, Nxn, Wfs1, Ndfip2, Mapk9, Dcun1d4, Gclc, Chp1
GO:0000098	0.215205		0.978906	1	6	sulfur amino acid catabolic process	BP	Cdo1
GO:0071877	0.215209		0.979695	1	5	regulation of adrenergic receptor signaling pathway	BP	Arrdc3
GO:0010107	0.215537		0.946303	2	19	potassium ion import	BP	Kcnj11, Kcnj16
GO:0021562	0.215635		0.980808	1	4	vestibulocochlear nerve development	BP	Nrp2
GO:1901072	0.215636		0.978817	1	6	glucosamine-containing compound catabolic process	BP	Gnpda1
GO:0042743	0.2159		0.945351	2	24	hydrogen peroxide metabolic process	BP	Stat3, Cat
GO:0045766	0.216073		0.899629	5	72	positive regulation of angiogenesis	BP	Ghsr, Stim1, Nr2e1, Anxa3, Jak1
5410	0.216131		0.899978	5	63	Hypertrophic cardiomyopathy (HCM)	KEGG	Cacng5, Lama2, Tgfb3, Cacnb4, Cacnb3
GO:0042391	0.216179		0.850644	18	314	regulation of membrane potential	BP	Kcnc4, Jun, Glrx, Trdn, Cnr1, Cacnb4, Cacnb3, Gsk3b, Scn1b, Chrna1, Ank2, Kcnk10, Bcl2, Mllt11, Kcnj11, Igsf9b, Gclc, Mpp2
GO:0060677	0.216499		0.980646	1	4	ureteric bud elongation	BP	Kif26b
4962	0.216506		0.924552	3	37	Vasopressin-regulated water reabsorption	KEGG	Creb5, Dynll2, Nsf
GO:2000576	0.216508		0.978637	1	6	positive regulation of microtubule motor activity	BP	Dynll2
GO:0034612	0.216523		0.890984	6	92	response to tumor necrosis factor	BP	Gch1, Hipk1, Adamts12, Tnfrsf21, Traf3, Ccdc3
GO:0050953	0.216794		0.899257	5	70	sensory perception of light stimulus	BP	Myo3b, Wfs1, Cacnb4, Nr2e1, Atp8a2
GO:0140104	0.216876		0.977234	1	9	molecular carrier activity	MF	Atp7a
GO:1904429	0.216931		0.97855	1	6	regulation of t-circle formation	BP	Xrcc5
GO:0008236	0.216933		0.898856	5	79	serine-type peptidase activity	MF	Clpp, Plat, Masp1, Prepl, Cpe
GO:0032693	0.217014		0.979336	1	5	negative regulation of interleukin-10 production	BP	Tnfrsf21
GO:1903202	0.217097		0.924084	3	39	negative regulation of oxidative stress-induced cell death	BP	Fzd1, Glrx, Nup93
GO:0006268	0.217133		0.978507	1	6	DNA unwinding involved in DNA replication	BP	Mcm6
GO:0017085	0.217137		0.979311	1	5	response to insecticide	BP	Scn1b
GO:0098821	0.217163		0.979306	1	5	BMP receptor activity	MF	Sostdc1
GO:0009308	0.21763		0.909223	4	58	amine metabolic process	BP	Hprt, Gde1, Atp7a, Odc1
GO:0032469	0.217862		0.944978	2	21	endoplasmic reticulum calcium ion homeostasis	BP	Wfs1, Bcl2
GO:0016861	0.218444		0.977655	1	7	intramolecular oxidoreductase activity, interconverting aldoses and ketoses	MF	Gnpda1
GO:0031652	0.218451		0.979047	1	5	positive regulation of heat generation	BP	Cnr1
GO:0033602	0.218795		0.978977	1	5	negative regulation of dopamine secretion	BP	Cnr1
GO:2000481	0.219021		0.980168	1	4	positive regulation of cAMP-dependent protein kinase activity	BP	Rapgef2
GO:0006536	0.219339		0.944546	2	20	glutamate metabolic process	BP	Gclc, Aldh4a1
GO:0015684	0.219378		0.978038	1	6	ferrous iron transport	BP	Mmgt1
GO:2000026	0.219526		0.818401	67	1316	regulation of multicellular organismal development	BP	Sostdc1, Ghsr, Zhx2, Nefm, Cntn2, Fzd1, Hap1, Plxnc1, Stim1, Islr2, Jun, Ust, Nfib, Lama2, Kndc1, Cenpf, Arsb, Shb, Stat3, Tgfb3, Cnr1, Tbr1, Ret, Nr2e1, Flrt1, Ahi1, Xrcc5, Rbfox1, Grn, Zfp608, H2-DMa, Skil, Bcl11a, Zeb2, Rassf2, Dscam, Atp8a2, Gsk3b, Scn1b, Bend6, Map2, Meis2, Pak3, Neurl1a, Sdc2, Tmem178, Inpp5f, Bcl2, Rapgef2, Ctnnbip1, Adamts12, Poglut1, Trak1, Nr2c2, Epha3, Nap1l2, Pbx1, Im…
GO:0043501	0.21964		0.945093	2	17	skeletal muscle adaptation	BP	Tead1, Mstn
GO:0043101	0.219736		0.977377	1	7	purine-containing compound salvage	BP	Hprt
GO:0000149	0.219755		0.88219	7	106	SNARE binding	MF	Vamp1, Nbas, Syt13, Sec24d, Unc13c, Cplx2, Nsf
GO:0010970	0.219923		0.876462	8	124	transport along microtubule	BP	Nefm, Hap1, Ap3m2, Dynll2, Dst, Arhgap21, Trak1, Stau2
GO:0099111	0.219923		0.876462	8	124	microtubule-based transport	BP	Nefm, Hap1, Ap3m2, Dynll2, Dst, Arhgap21, Trak1, Stau2
GO:0010528	0.220143		0.978704	1	5	regulation of transposition	BP	Morc1
GO:0010529	0.220143		0.978704	1	5	negative regulation of transposition	BP	Morc1
GO:0032196	0.220143		0.978704	1	5	transposition	BP	Morc1
GO:0099640	0.220634		0.979858	1	4	axo-dendritic protein transport	BP	Stau2
GO:0046470	0.220718		0.943344	2	24	phosphatidylcholine metabolic process	BP	Dbi, Acsl3
GO:0010765	0.220795		0.922627	3	34	positive regulation of sodium ion transport	BP	Glrx, Scn1b, Chp1
GO:0017156	0.220958		0.888212	6	87	calcium ion regulated exocytosis	BP	Syt13, Cadps, Prepl, Unc13c, Cplx2, Chp1
GO:0001055	0.221157		0.976281	1	9	RNA polymerase II activity	MF	Polr2a
GO:0032898	0.221274		0.978473	1	5	neurotrophin production	BP	Hap1
GO:0071073	0.221413		0.977608	1	6	positive regulation of phospholipid biosynthetic process	BP	Acsl3
GO:0017034	0.221485		0.978429	1	5	Rap guanyl-nucleotide exchange factor activity	MF	Rapgef2
GO:2000369	0.222009		0.943865	2	18	regulation of clathrin-dependent endocytosis	BP	Ubqln2, Dnajc6
GO:0004185	0.222098		0.978303	1	5	serine-type carboxypeptidase activity	MF	Cpe
GO:0009374	0.222132		0.979569	1	4	biotin binding	MF	Hlcs
GO:0031272	0.222205		0.978282	1	5	regulation of pseudopodium assembly	BP	Cdc42ep2
GO:0031274	0.222205		0.978282	1	5	positive regulation of pseudopodium assembly	BP	Cdc42ep2
GO:0044539	0.222359		0.977406	1	6	long-chain fatty acid import	BP	Acsl3
GO:0030032	0.222939		0.906451	4	52	lamellipodium assembly	BP	Vav2, Ptpro, Atp7a, Spata13
GO:0016126	0.22309		0.920892	3	40	sterol biosynthetic process	BP	Mvk, Cyb5r3, Sqle
GO:1900193	0.223288		0.976602	1	7	regulation of oocyte maturation	BP	Shb
GO:0010464	0.223438		0.921254	3	34	regulation of mesenchymal cell proliferation	BP	Nfib, Irs1, Ctnnbip1
GO:0005432	0.223448		0.979312	1	4	calcium:sodium antiporter activity	MF	Slc8a3
GO:0032305	0.223512		0.977159	1	6	positive regulation of icosanoid secretion	BP	Mapk9
GO:0016176	0.223512		0.978012	1	5	superoxide-generating NADPH oxidase activator activity	MF	Sh3pxd2a
GO:0019238	0.223664		0.977126	1	6	cyclohydrolase activity	MF	Gch1
GO:0004791	0.223789		0.976492	1	7	thioredoxin-disulfide reductase activity	MF	Nxn
GO:0005253	0.223868		0.905681	4	56	anion channel activity	MF	Gabrq, Gabra3, Clcn3, Gabrg2
GO:0016667	0.224384		0.919813	3	46	oxidoreductase activity, acting on a sulfur group of donors	MF	Glrx, Nxn, Gsr
GO:0019955	0.224457		0.905388	4	55	cytokine binding	MF	Sostdc1, Cntfr, Tgfb3, Lifr
GO:0006836	0.224691		0.868268	9	142	neurotransmitter transport	BP	Kcnc4, Slc17a8, Syt13, Cadps, Sv2a, Prepl, Slc17a6, Unc13c, Cplx2
GO:0002504	0.224809		0.976266	1	7	antigen processing and presentation of peptide or polysaccharide antigen via MHC class II	BP	H2-DMa
GO:1904415	0.224895		0.976861	1	6	regulation of xenophagy	BP	Optn
GO:1904417	0.224895		0.976861	1	6	positive regulation of xenophagy	BP	Optn
GO:0035434	0.225074		0.977687	1	5	copper ion transmembrane transport	BP	Atp7a
GO:1904304	0.225087		0.976819	1	6	regulation of gastro-intestinal system smooth muscle contraction	BP	Ghsr
GO:0032224	0.225417		0.977615	1	5	positive regulation of synaptic transmission, cholinergic	BP	Lama2
GO:0098904	0.22569		0.978871	1	4	regulation of AV node cell action potential	BP	Ank2
GO:0000956	0.225756		0.884783	6	96	nuclear-transcribed mRNA catabolic process	BP	Samd4, Nanos1, Nbas, Ago2, Pnrc2, Pnrc1
GO:0008286	0.226101		0.884938	6	83	insulin receptor signaling pathway	BP	Rhoq, Osbpl8, Nucb2, Gsk3b, Irs1, Mstn
GO:2000617	0.226487		0.976514	1	6	positive regulation of histone H3-K9 acetylation	BP	Nap1l2
GO:0033032	0.226566		0.941522	2	20	regulation of myeloid cell apoptotic process	BP	Ghsr, Bcl2
GO:1900408	0.226861		0.918908	3	40	negative regulation of cellular response to oxidative stress	BP	Fzd1, Glrx, Nup93
GO:0006573	0.226939		0.976416	1	6	valine metabolic process	BP	Hibadh
GO:0090258	0.22696		0.977291	1	5	negative regulation of mitochondrial fission	BP	Ppargc1a
GO:0006568	0.226983		0.976406	1	6	tryptophan metabolic process	BP	Atp7a
GO:0006586	0.226983		0.976406	1	6	indolalkylamine metabolic process	BP	Atp7a
GO:0070253	0.227041		0.977273	1	5	somatostatin secretion	BP	Irs1
GO:0072216	0.22714		0.976372	1	6	positive regulation of metanephros development	BP	Ret
GO:0061072	0.227204		0.977239	1	5	iris morphogenesis	BP	Hipk1
GO:0006596	0.227278		0.975715	1	7	polyamine biosynthetic process	BP	Odc1
GO:0038034	0.227457		0.90362	4	55	signal transduction in absence of ligand	BP	Ppp2r1b, Ret, Gsk3b, Bcl2
GO:0097192	0.227457		0.90362	4	55	extrinsic apoptotic signaling pathway in absence of ligand	BP	Ppp2r1b, Ret, Gsk3b, Bcl2
GO:0000154	0.227568		0.940187	2	26	rRNA modification	BP	Tfb2m, Mettl15
GO:0016891	0.227588		0.940299	2	25	endoribonuclease activity, producing 5'-phosphomonoesters	MF	Endov, Ago2
GO:0001106	0.227891		0.94096	2	20	RNA polymerase II transcription corepressor activity	MF	Nfib, Bend6
GO:0005314	0.228044		0.977061	1	5	high-affinity glutamate transmembrane transporter activity	MF	Slc1a2
GO:0010738	0.228371		0.941467	2	17	regulation of protein kinase A signaling	BP	Pde10a, Aip
GO:0005070	0.228808		0.940206	2	22	SH3/SH2 adaptor activity	MF	Sla, Shb
GO:0044323	0.229498		0.976752	1	5	retinoic acid-responsive element binding	MF	Myt1l
GO:0070305	0.229519		0.976747	1	5	response to cGMP	BP	Rapgef2
GO:0071321	0.229519		0.976747	1	5	cellular response to cGMP	BP	Rapgef2
GO:0006959	0.229855		0.916908	3	46	humoral immune response	BP	Masp1, H2-DMa, Tnfrsf21
GO:0002864	0.229924		0.975116	1	7	regulation of acute inflammatory response to antigenic stimulus	BP	Cnr1
5144	0.229967		0.940288	2	19	Malaria	KEGG	Tgfb3, Sdc2
GO:1990034	0.230148		0.976612	1	5	calcium ion export across plasma membrane	BP	Slc8a3
GO:0045110	0.230348		0.976569	1	5	intermediate filament bundle assembly	BP	Nefm
GO:0048596	0.230391		0.940614	2	17	embryonic camera-type eye morphogenesis	BP	Hipk1, Sp3
GO:0071280	0.230418		0.975648	1	6	cellular response to copper ion	BP	Atp7a
GO:2000171	0.230905		0.917444	3	33	negative regulation of dendrite development	BP	Bcl11a, Gsk3b, Rapgef2
GO:0046439	0.231207		0.975471	1	6	L-cysteine metabolic process	BP	Cdo1
GO:0048066	0.231343		0.916884	3	36	developmental pigmentation	BP	Zeb2, Bcl2, Atp6ap2
GO:1901223	0.231465		0.975414	1	6	negative regulation of NIK/NF-kappaB signaling	BP	Rassf2
GO:1903044	0.231542		0.975397	1	6	protein localization to membrane raft	BP	Flot2
GO:0014046	0.231739		0.939121	2	21	dopamine secretion	BP	Cnr1, Pcp4
GO:0014059	0.231739		0.939121	2	21	regulation of dopamine secretion	BP	Cnr1, Pcp4
GO:0006779	0.231753		0.938632	2	24	porphyrin-containing compound biosynthetic process	BP	Ank1, Uros
GO:0051209	0.231803		0.889883	5	68	release of sequestered calcium ion into cytosol	BP	Hap1, Trdn, Dbi, Ank2, Ryr1
GO:0051283	0.231803		0.889883	5	68	negative regulation of sequestering of calcium ion	BP	Hap1, Trdn, Dbi, Ank2, Ryr1
GO:0048799	0.231925		0.940268	2	16	animal organ maturation	BP	Ret, Ryr1
GO:0015643	0.231926		0.974657	1	7	toxic substance binding	MF	Nefm
GO:0010744	0.232372		0.97521	1	6	positive regulation of macrophage derived foam cell differentiation	BP	Mapk9
GO:0044242	0.232481		0.873089	7	121	cellular lipid catabolic process	BP	Cnr1, Hadh, Acot7, Dbi, Abhd5, Inpp5f, Irs1
GO:0060177	0.232635		0.976076	1	5	regulation of angiotensin metabolic process	BP	Atp6ap2
GO:0030217	0.233008		0.862121	9	147	T cell differentiation	BP	Themis, Shb, Stat3, Zfp608, H2-DMa, Bcl11a, Bcl2, Sp3, Atp7a
GO:0070885	0.233034		0.975989	1	5	negative regulation of calcineurin-NFAT signaling cascade	BP	Chp1
GO:0106057	0.233034		0.975989	1	5	negative regulation of calcineurin-mediated signaling	BP	Chp1
GO:0071205	0.233312		0.977334	1	4	protein localization to juxtaparanode region of axon	BP	Cntn2
430	0.233401		0.974978	1	6	Taurine and hypotaurine metabolism	KEGG	Cdo1
GO:0019184	0.234506		0.97406	1	7	nonribosomal peptide biosynthetic process	BP	Gclc
GO:0005375	0.234608		0.974704	1	6	copper ion transmembrane transporter activity	MF	Atp7a
GO:0045505	0.235621		0.937636	2	20	dynein intermediate chain binding	MF	Dynll2, Dnah5
GO:0002283	0.235882		0.974414	1	6	neutrophil activation involved in immune response	BP	Anxa3
GO:0043312	0.235882		0.974414	1	6	neutrophil degranulation	BP	Anxa3
GO:0014062	0.235974		0.973716	1	7	regulation of serotonin secretion	BP	Hrh3
GO:1901606	0.236026		0.913783	3	43	alpha-amino acid catabolic process	BP	Cdo1, Hibadh, Aldh4a1
5160	0.236415		0.877831	6	89	Hepatitis C	KEGG	Ppp2r1b, Stat3, Gsk3b, Mapk9, Jak1, Traf3
GO:1903998	0.236713		0.974223	1	6	regulation of eating behavior	BP	Ghsr
GO:0033613	0.236724		0.898092	4	55	activating transcription factor binding	MF	Jun, Wfs1, Ifi27, Nek6
GO:0031327	0.237016		0.80681	53	1070	negative regulation of cellular biosynthetic process	BP	Rnf128, Ghsr, Zhx2, Samd4, Txnip, Fzd1, Hrh3, Jun, Hipk1, Lmcd1, Nfib, Morc1, Wfs1, Cenpf, Stat3, Nacc2, Myt1l, Tgfb3, Nanos1, Ifi27, Nr2e1, Xrcc5, Zbtb18, Mvk, Zfp608, Zbtb20, Nucb2, Skil, Nfia, Peg3, Pkia, Bcl11a, Zeb2, Ywhab, Nkrf, Zhx1, Mxi1, Lancl2, Ago2, Cggbp1, Rapgef2, Ctnnbip1, Klf12, Jazf1, Taf9b, Sp3, Zfp706, Tnrc6a, Rfx5, Gclc, Runx1t1, Impact, Bcor
GO:0042148	0.237475		0.974048	1	6	strand invasion	BP	Rad51d
GO:0098935	0.237669		0.974968	1	5	dendritic transport	BP	Stau2
GO:0098937	0.237669		0.974968	1	5	anterograde dendritic transport	BP	Stau2
GO:0001161	0.237842		0.973963	1	6	intronic transcription regulatory region sequence-specific DNA binding	MF	Smyd3
GO:0051534	0.237899		0.974917	1	5	negative regulation of NFAT protein import into nucleus	BP	Gsk3b
62	0.237907		0.972747	1	8	Fatty acid elongation	KEGG	Hadh
GO:0007018	0.238007		0.847002	12	205	microtubule-based movement	BP	Nefm, Hap1, Ap3m2, Dynll2, Dnah5, Dst, Dpcd, Arhgap21, Kif21a, Trak1, Kif26b, Stau2
GO:0070207	0.23807		0.936364	2	21	protein homotrimerization	BP	Skil, Slc1a2
GO:0035637	0.238098		0.869586	7	102	multicellular organismal signaling	BP	Cacng5, Ghsr, Kcnc4, Cacnb4, Scn1b, Chrna1, Ank2
GO:0044070	0.238193		0.885448	5	76	regulation of anion transport	BP	Hrh3, Sv2a, Atp8a2, Mapk9, Gopc
GO:0019882	0.23857		0.912202	3	46	antigen processing and presentation	BP	Tap1, Tapbp, H2-DMa
10	0.238654		0.91222	3	45	Glycolysis / Gluconeogenesis	KEGG	Aldh7a1, Aldh3a2, Aldh9a1
GO:0048259	0.238749		0.885204	5	73	regulation of receptor-mediated endocytosis	BP	Hist1h1a, Ahi1, Ubqln2, Dnajc6, Nsf
GO:0006816	0.238762		0.83839	15	262	calcium ion transport	BP	Cacng5, Hap1, Stim1, Wfs1, Trdn, Cacnb4, Cacnb3, Fam155a, Mcur1, Dbi, Ank2, Slc8a3, Micu2, Bcl2, Ryr1
GO:0090195	0.238812		0.973738	1	6	chemokine secretion	BP	Postn
GO:0090196	0.238812		0.973738	1	6	regulation of chemokine secretion	BP	Postn
GO:0090197	0.238812		0.973738	1	6	positive regulation of chemokine secretion	BP	Postn
GO:0016082	0.238898		0.936428	2	19	synaptic vesicle priming	BP	Cadps, Unc13c
GO:1903069	0.23895		0.973012	1	7	regulation of ER-associated ubiquitin-dependent protein catabolic process	BP	Ubqln2
GO:0060352	0.23923		0.972946	1	7	cell adhesion molecule production	BP	Glrx
GO:0098903	0.239589		0.974539	1	5	regulation of membrane repolarization during action potential	BP	Cacnb3
GO:0032310	0.239607		0.973553	1	6	prostaglandin secretion	BP	Mapk9
GO:0055001	0.239643		0.862514	8	118	muscle cell development	BP	Cacnb4, Smyd3, Ank2, Rcan1, Bcl2, Ryr1, Ldb3, Neb
GO:0048593	0.240109		0.87546	6	85	camera-type eye morphogenesis	BP	Hipk1, Ahi1, Col8a1, Dscam, Atp8a2, Sp3
GO:2001212	0.240235		0.972705	1	7	regulation of vasculogenesis	BP	Rapgef2
GO:0003828	0.240323		0.974373	1	5	alpha-N-acetylneuraminate alpha-2,8-sialyltransferase activity	MF	St8sia1
GO:0051282	0.240347		0.884341	5	69	regulation of sequestering of calcium ion	BP	Hap1, Trdn, Dbi, Ank2, Ryr1
GO:0060916	0.240433		0.974349	1	5	mesenchymal cell proliferation involved in lung development	BP	Nfib
GO:0001991	0.240533		0.973337	1	6	regulation of systemic arterial blood pressure by circulatory renin-angiotensin	BP	Atp6ap2
GO:0009071	0.240863		0.972028	1	8	serine family amino acid catabolic process	BP	Cdo1
GO:0046549	0.240864		0.973259	1	6	retinal cone cell development	BP	Ahi1
GO:0060613	0.241221		0.973175	1	6	fat pad development	BP	Arrdc3
GO:0005114	0.241326		0.974146	1	5	type II transforming growth factor beta receptor binding	MF	Tgfb3
GO:1901299	0.241571		0.972384	1	7	negative regulation of hydrogen peroxide-mediated programmed cell death	BP	Glrx
GO:0006560	0.241698		0.972353	1	7	proline metabolic process	BP	Aldh4a1
GO:0032056	0.241856		0.973026	1	6	positive regulation of translation in response to stress	BP	Impact
GO:0060510	0.242733		0.973826	1	5	Type II pneumocyte differentiation	BP	Nfib
GO:0070509	0.243066		0.894509	4	51	calcium ion import	BP	Fam155a, Mcur1, Slc8a3, Micu2
GO:0002090	0.243608		0.909969	3	39	regulation of receptor internalization	BP	Ahi1, Ubqln2, Nsf
GO:0001911	0.243704		0.971866	1	7	negative regulation of leukocyte mediated cytotoxicity	BP	Tap1
GO:0001541	0.244126		0.909596	3	40	ovarian follicle development	BP	Ermp1, Bcl2, Pcyt1b
GO:0070412	0.24432		0.9338	2	20	R-SMAD binding	MF	Jun, Zeb2
GO:0060050	0.244332		0.972438	1	6	positive regulation of protein glycosylation	BP	Chp1
GO:0033014	0.244384		0.932895	2	25	tetrapyrrole biosynthetic process	BP	Ank1, Uros
GO:0033028	0.244509		0.933506	2	21	myeloid cell apoptotic process	BP	Ghsr, Bcl2
GO:0006450	0.244688		0.970661	1	9	regulation of translational fidelity	BP	Dtd1
GO:0051924	0.245229		0.85304	9	150	regulation of calcium ion transport	BP	Hap1, Stim1, Wfs1, Trdn, Cacnb4, Cacnb3, Dbi, Ank2, Bcl2
GO:0046823	0.24578		0.892533	4	56	negative regulation of nucleocytoplasmic transport	BP	Fzd1, Pkia, Gsk3b, Chp1
GO:0052689	0.245971		0.880171	5	82	carboxylic ester hydrolase activity	MF	Lars2, Gde1, Acot7, Siae, Dtd1
GO:0099004	0.246052		0.972026	1	6	calmodulin dependent kinase signaling pathway	BP	Pcp4
GO:0015093	0.24611		0.972012	1	6	ferrous iron transmembrane transporter activity	MF	Mmgt1
GO:0010656	0.246286		0.908588	3	38	negative regulation of muscle cell apoptotic process	BP	Lifr, Gsk3b, Bcl2
GO:0046654	0.246505		0.971917	1	6	tetrahydrofolate biosynthetic process	BP	Gch1
GO:0045892	0.246707		0.803466	41	818	negative regulation of transcription, DNA-templated	BP	Zhx2, Txnip, Fzd1, Jun, Hipk1, Lmcd1, Nfib, Morc1, Wfs1, Cenpf, Nacc2, Myt1l, Ifi27, Nr2e1, Xrcc5, Zbtb18, Zfp608, Zbtb20, Skil, Nfia, Peg3, Pkia, Bcl11a, Zeb2, Ywhab, Nkrf, Zhx1, Mxi1, Lancl2, Cggbp1, Ctnnbip1, Klf12, Jazf1, Taf9b, Sp3, Zfp706, Rfx5, Gclc, Runx1t1, Impact, Bcor
GO:0006081	0.246721		0.90765	3	47	cellular aldehyde metabolic process	BP	Pdxp, Aldh3a2, Aldh9a1
GO:0008063	0.246764		0.971855	1	6	Toll signaling pathway	BP	Traf3
GO:0050806	0.246812		0.851974	9	143	positive regulation of synaptic transmission	BP	Hap1, Lama2, Lgi1, Nr2e1, Dbi, Gsk3b, Slc8a3, Igsf9b, Mpp2
GO:0042439	0.24752		0.970927	1	7	ethanolamine-containing compound metabolic process	BP	Gde1
GO:0030628	0.247616		0.970347	1	8	pre-mRNA 3'-splice site binding	MF	Zrsr2
GO:0000414	0.247784		0.974247	1	4	regulation of histone H3-K36 methylation	BP	Bcor
GO:0070306	0.247929		0.93218	2	20	lens fiber cell differentiation	BP	Skil, Zeb2
GO:0050665	0.24806		0.970793	1	7	hydrogen peroxide biosynthetic process	BP	Stat3
GO:0048251	0.248065		0.974185	1	4	elastic fiber assembly	BP	Atp7a
GO:1905050	0.248548		0.970671	1	7	positive regulation of metallopeptidase activity	BP	Stat3
GO:0030433	0.248582		0.890493	4	62	ubiquitin-dependent ERAD pathway	BP	Fbxo2, Wfs1, Ubqln2, Jkamp
GO:0015914	0.248727		0.907444	3	36	phospholipid transport	BP	Osbpl8, Atp8a2, Atp11c
GO:1900449	0.248767		0.907422	3	36	regulation of glutamate receptor signaling pathway	BP	Cacng5, Frrs1l, Ppargc1a
GO:0014070	0.248933		0.812859	26	496	response to organic cyclic compound	BP	Hlcs, Hrh3, Jun, Glrx, Stat3, Tgfb3, Cnr1, Nr2e1, Cdo1, Grn, Smyd3, Adcy5, Pak3, Ago2, Slc8a3, Irs1, Pdxp, Bcl2, Rapgef2, Gabrg2, Kcnj11, Nr2c2, Epha5, Impact, Mstn, Ryr1
GO:0017171	0.24913		0.878059	5	83	serine hydrolase activity	MF	Clpp, Plat, Masp1, Prepl, Cpe
GO:0009158	0.249368		0.969901	1	8	ribonucleoside monophosphate catabolic process	BP	Hprt
GO:0009169	0.249368		0.969901	1	8	purine ribonucleoside monophosphate catabolic process	BP	Hprt
GO:0051188	0.249385		0.868321	6	115	cofactor biosynthetic process	BP	Gch1, Spr, Tpk1, Ank1, Acot7, Uros
GO:0008203	0.249641		0.877932	5	77	cholesterol metabolic process	BP	Mvk, Npc2, Cyb5r3, Cat, Sqle
GO:0033603	0.249655		0.970394	1	7	positive regulation of dopamine secretion	BP	Pcp4
GO:0014050	0.249857		0.970344	1	7	negative regulation of glutamate secretion	BP	Hrh3
GO:1904181	0.250074		0.971049	1	6	positive regulation of membrane depolarization	BP	Mllt11
GO:0051208	0.25032		0.877777	5	70	sequestering of calcium ion	BP	Hap1, Trdn, Dbi, Ank2, Ryr1
GO:0046982	0.250745		0.81746	21	421	protein heterodimerization activity	MF	Zhx2, Nefm, Nrn1, Fzd1, Tap1, Jun, Tead1, Tgfb3, Dynll2, Lifr, Clcn3, Bcl11a, Adcy5, Zhx1, Micu2, Bcl2, Flot2, Taf9b, Nr2c2, Gclc, Pbx1
GO:0031642	0.250832		0.970863	1	6	negative regulation of myelination	BP	Tnfrsf21
GO:0009113	0.251303		0.969406	1	8	purine nucleobase biosynthetic process	BP	Hprt
GO:0042558	0.251458		0.929664	2	25	pteridine-containing compound metabolic process	BP	Gch1, Spr
GO:0015802	0.251573		0.97068	1	6	basic amino acid transport	BP	Slc15a4
GO:0002286	0.251929		0.905265	3	40	T cell activation involved in immune response	BP	Shb, Stat3, Atp7a
GO:0043950	0.252123		0.969771	1	7	positive regulation of cAMP-mediated signaling	BP	Rapgef2
GO:0048641	0.252211		0.905398	3	37	regulation of skeletal muscle tissue development	BP	Rbfox1, Bcl2, Mstn
GO:0043383	0.252249		0.969739	1	7	negative T cell selection	BP	Themis
GO:0050773	0.252352		0.843383	10	156	regulation of dendrite development	BP	Kndc1, Nr2e1, Grn, Bcl11a, Gsk3b, Pak3, Neurl1a, Sdc2, Rapgef2, Stau2
GO:0009120	0.252753		0.969031	1	8	deoxyribonucleoside metabolic process	BP	Dck
GO:0019896	0.252855		0.969585	1	7	axonal transport of mitochondrion	BP	Trak1
GO:0032328	0.252884		0.970355	1	6	alanine transport	BP	Slc36a1
GO:1902679	0.252911		0.797986	41	821	negative regulation of RNA biosynthetic process	BP	Zhx2, Txnip, Fzd1, Jun, Hipk1, Lmcd1, Nfib, Morc1, Wfs1, Cenpf, Nacc2, Myt1l, Ifi27, Nr2e1, Xrcc5, Zbtb18, Zfp608, Zbtb20, Skil, Nfia, Peg3, Pkia, Bcl11a, Zeb2, Ywhab, Nkrf, Zhx1, Mxi1, Lancl2, Cggbp1, Ctnnbip1, Klf12, Jazf1, Taf9b, Sp3, Zfp706, Rfx5, Gclc, Runx1t1, Impact, Bcor
GO:1903507	0.252911		0.797986	41	821	negative regulation of nucleic acid-templated transcription	BP	Zhx2, Txnip, Fzd1, Jun, Hipk1, Lmcd1, Nfib, Morc1, Wfs1, Cenpf, Nacc2, Myt1l, Ifi27, Nr2e1, Xrcc5, Zbtb18, Zfp608, Zbtb20, Skil, Nfia, Peg3, Pkia, Bcl11a, Zeb2, Ywhab, Nkrf, Zhx1, Mxi1, Lancl2, Cggbp1, Ctnnbip1, Klf12, Jazf1, Taf9b, Sp3, Zfp706, Rfx5, Gclc, Runx1t1, Impact, Bcor
GO:2000649	0.25351		0.904471	3	39	regulation of sodium ion transmembrane transporter activity	BP	Glrx, Scn1b, Chp1
GO:0021902	0.253608		0.970175	1	6	commitment of neuronal cell to specific neuron type in forebrain	BP	Tbr1
GO:0021894	0.25379		0.969347	1	7	cerebral cortex GABAergic interneuron development	BP	Cntn2
GO:2000573	0.253844		0.887277	4	61	positive regulation of DNA biosynthetic process	BP	Xrcc5, Nek7, Gsk3b, Pak3
GO:0002526	0.254066		0.903816	3	43	acute inflammatory response	BP	Stat3, Cnr1, Ctnnbip1
GO:0060306	0.25443		0.929465	2	19	regulation of membrane repolarization	BP	Cacnb3, Scn1b
GO:0018095	0.254993		0.969829	1	6	protein polyglutamylation	BP	Ttll5
GO:0033209	0.25524		0.903405	3	40	tumor necrosis factor-mediated signaling pathway	BP	Hipk1, Traf3, Ccdc3
GO:0048484	0.2559		0.969601	1	6	enteric nervous system development	BP	Ret
GO:0046686	0.256046		0.927858	2	23	response to cadmium ion	BP	Jun, Mapk9
GO:0043374	0.256105		0.969549	1	6	CD8-positive, alpha-beta T cell differentiation	BP	Bcl2
5330	0.256167		0.967308	1	10	Allograft rejection	KEGG	H2-DMa
5332	0.256167		0.967308	1	10	Graft-versus-host disease	KEGG	H2-DMa
GO:0051094	0.256274		0.791615	48	944	positive regulation of developmental process	BP	Ghsr, Fzd1, Hap1, Plxnc1, Stim1, Islr2, Jun, Tead1, Arsb, Shb, Olfm4, Stat3, Tgfb3, Cnr1, Ret, Nr2e1, Flrt1, Ahi1, Xrcc5, Grn, H2-DMa, Skil, Bcl11a, Zeb2, Dscam, Atp8a2, Gsk3b, Scn1b, Bend6, Pak3, Neurl1a, Bcl2, Rapgef2, Ctnnbip1, Trak1, Mapk9, Nr2c2, Ppargc1a, Epha3, Dock5, Nap1l2, Impact, Pcp4, Stau2, Anxa3, Atp11c, Jak1, Ccdc3
GO:0010243	0.256286		0.803572	29	555	response to organonitrogen compound	BP	Ghsr, Rhoq, Osbpl8, Hlcs, Fbxo2, Jun, Wfs1, Stat3, Cnr1, Anxa5, Hprt, Cdo1, Nucb2, Ubqln2, Slc1a2, Gsk3b, Neurl1a, Slc8a3, Irs1, Pdxp, Rapgef2, Jkamp, Fundc1, Gabrg2, Kcnj11, Atp7a, Impact, Mstn, Ryr1
GO:0022853	0.257197		0.87284	5	79	active ion transmembrane transporter activity	MF	Slc4a8, Anxa5, Slc1a2, Atp6v1g2, Atp7a
GO:2000035	0.257258		0.968452	1	7	regulation of stem cell division	BP	Nap1l2
GO:0030507	0.257284		0.9279	2	20	spectrin binding	MF	Ank1, Ank2
GO:0045444	0.257453		0.839269	10	170	fat cell differentiation	BP	Osbpl8, Fbxo9, Creb5, Bscl2, Nucb2, Gsk3b, Ppargc1a, Runx1t1, Arxes1, Ccdc3
GO:0000977	0.257516		0.809102	23	431	RNA polymerase II regulatory region sequence-specific DNA binding	MF	Jun, Tead1, Nfib, Stat3, Nacc2, Myt1l, Tbr1, Skil, Nfia, Cys1, Smyd3, Bcl11a, Nkrf, Mxi1, Meis2, Neurod6, Cggbp1, Klf12, Sp3, Nr2c2, Rfx5, Pbx1, Bcor
GO:0060179	0.257638		0.969161	1	6	male mating behavior	BP	Grn
GO:0015824	0.257761		0.969129	1	6	proline transport	BP	Slc36a1
GO:0090193	0.257994		0.96907	1	6	positive regulation of glomerulus development	BP	Ret
GO:0097035	0.258135		0.927504	2	20	regulation of membrane lipid distribution	BP	Atp8a2, Atp11c
GO:0042398	0.258734		0.926272	2	25	cellular modified amino acid biosynthetic process	BP	Gch1, Gclc
GO:0071260	0.259001		0.926666	2	22	cellular response to mechanical stimulus	BP	Gsk3b, Habp4
GO:0003678	0.259132		0.901295	3	39	DNA helicase activity	MF	Chd1l, Mcm6, Xrcc5
GO:0070513	0.259168		0.967343	1	8	death domain binding	MF	Bcl2
GO:0004012	0.259177		0.927875	2	17	phospholipid-translocating ATPase activity	MF	Atp8a2, Atp11c
GO:2000586	0.259227		0.969907	1	5	regulation of platelet-derived growth factor receptor-beta signaling pathway	BP	Glrx
GO:0001075	0.259293		0.968739	1	6	transcription factor activity, RNA polymerase II core promoter sequence-specific binding involved in preinitiation complex assembly	MF	Taf9b
GO:0097475	0.259401		0.969864	1	5	motor neuron migration	BP	Nhsl1
GO:0010649	0.25952		0.96868	1	6	regulation of cell communication by electrical coupling	BP	Trdn
GO:1901166	0.259788		0.969768	1	5	neural crest cell migration involved in autonomic nervous system development	BP	Nrp2
GO:0086029	0.259831		0.969757	1	5	Purkinje myocyte to ventricular cardiac muscle cell signaling	BP	Scn1b
GO:0086068	0.259831		0.969757	1	5	Purkinje myocyte to ventricular cardiac muscle cell communication	BP	Scn1b
GO:0002347	0.259963		0.967744	1	7	response to tumor cell	BP	Txnip
GO:0001505	0.260063		0.841877	9	151	regulation of neurotransmitter levels	BP	Kcnc4, Hrh3, Syt13, Cadps, Prepl, Aldh9a1, Slc17a6, Unc13c, Cplx2
GO:0046185	0.26015		0.966603	1	9	aldehyde catabolic process	BP	Pdxp
GO:0005219	0.260186		0.974387	1	3	ryanodine-sensitive calcium-release channel activity	MF	Ryr1
GO:0018242	0.260241		0.968495	1	6	protein O-linked glycosylation via serine	BP	Poglut1
GO:1902883	0.260692		0.900053	3	43	negative regulation of response to oxidative stress	BP	Fzd1, Glrx, Nup93
GO:0050699	0.260829		0.925135	2	26	WW domain binding	MF	Ndfip2, Rapgef2
GO:0071420	0.261167		0.968257	1	6	cellular response to histamine	BP	Gabrg2
GO:0060046	0.26123		0.96741	1	7	regulation of acrosome reaction	BP	Tcp11
GO:0014741	0.261514		0.925484	2	22	negative regulation of muscle hypertrophy	BP	Gsk3b, Mstn
GO:0034713	0.261974		0.967213	1	7	type I transforming growth factor beta receptor binding	MF	Tgfb3
GO:0014888	0.262345		0.899785	3	36	striated muscle adaptation	BP	Tead1, Inpp5f, Mstn
GO:0055067	0.262891		0.859351	6	96	monovalent inorganic cation homeostasis	BP	Slc4a8, Slc9a9, Clcn3, Slc9a6, Bcl2, Chp1
GO:0071447	0.263249		0.967716	1	6	cellular response to hydroperoxide	BP	Trp53inp1
GO:0016491	0.263287		0.806699	21	486	oxidoreductase activity	MF	Gpx8, Cryl1, Spr, Glrx, Nxn, Dhrs7, Aifm3, Gsr, Cdo1, Ndufaf2, Hadh, Hibadh, Cyb5r3, Aldh7a1, Aldh3a2, Kdsr, Cat, Aldh9a1, Mical2, Sqle, Aldh4a1
GO:0008017	0.263308		0.830787	11	182	microtubule binding	MF	Eml2, Stim1, Cep350, Dst, Map2, Jakmip3, Ska2, Kif21a, Kif26b, Cnn3, Chp1
GO:0016290	0.26347		0.965694	1	9	palmitoyl-CoA hydrolase activity	MF	Acot7
GO:0042940	0.263834		0.967563	1	6	D-amino acid transport	BP	Slc1a2
GO:0046632	0.264283		0.881058	4	55	alpha-beta T cell differentiation	BP	Shb, Stat3, Bcl2, Atp7a
GO:0051239	0.264352		0.772801	92	1876	regulation of multicellular organismal process	BP	Sostdc1, Rnf128, Ghsr, Zhx2, Nefm, Gch1, Cntn2, Fzd1, Hap1, Spr, Plxnc1, Kcnc4, Arrdc3, Vav2, Stim1, Optn, Islr2, Jun, Ust, Tead1, Plat, Lmcd1, Nfib, Tcp11, Lama2, Kndc1, Cenpf, Arsb, Shb, Stat3, Tgfb3, Cnr1, Tbr1, Ret, Anxa5, Nr2e1, Flrt1, Ahi1, Xrcc5, Rbfox1, Grn, Zfp608, Zbtb20, H2-DMa, Skil, Ptpro, Wnk1, Bcl11a, Zeb2, Rassf2, Dscam, Atp8a2, Gsk3b, Scn1b, Bend6, Map2, Ank2, Meis2, Pak3, Neurl1…
GO:0001765	0.264519		0.965897	1	8	membrane raft assembly	BP	Flot2
GO:0072583	0.264937		0.880644	4	55	clathrin-dependent endocytosis	BP	Grn, Ubqln2, Dnajc6, Inpp5f
GO:0051683	0.264969		0.966411	1	7	establishment of Golgi localization	BP	Arhgap21
GO:2000121	0.265183		0.96721	1	6	regulation of removal of superoxide radicals	BP	Gch1
GO:0000096	0.265282		0.92316	2	25	sulfur amino acid metabolic process	BP	Cdo1, Gclc
GO:0071356	0.265286		0.867363	5	80	cellular response to tumor necrosis factor	BP	Hipk1, Adamts12, Tnfrsf21, Traf3, Ccdc3
GO:1901136	0.265324		0.867129	5	86	carbohydrate derivative catabolic process	BP	Fbxo2, Gnpda1, Hprt, Pde10a, Adamts12
GO:0003073	0.265474		0.880175	4	57	regulation of systemic arterial blood pressure	BP	Ptpro, Wnk1, Atp6ap2, Postn
GO:0001764	0.265501		0.838057	9	134	neuron migration	BP	Cntn2, Kirrel3, Stat3, Nrp2, Nav1, Gpm6a, Gsk3b, Nhsl1, Rapgef2
GO:0001658	0.265552		0.897723	3	38	branching involved in ureteric bud morphogenesis	BP	Bcl2, Ctnnbip1, Pbx1
GO:0051302	0.265779		0.857314	6	96	regulation of cell division	BP	Txnip, Tgfb3, Zbtb18, Pdxp, Cat, Nap1l2
GO:0016266	0.265895		0.966161	1	7	O-glycan processing	BP	Xxylt1
GO:0044213	0.266123		0.9661	1	7	intronic transcription regulatory region DNA binding	MF	Smyd3
GO:0009410	0.266227		0.922414	2	27	response to xenobiotic stimulus	BP	Aip, Gclc
GO:1904683	0.26627		0.966923	1	6	regulation of metalloendopeptidase activity	BP	Stat3
GO:1900407	0.266287		0.879377	4	62	regulation of cellular response to oxidative stress	BP	Gch1, Fzd1, Glrx, Nup93
GO:0009128	0.26633		0.964899	1	9	purine nucleoside monophosphate catabolic process	BP	Hprt
GO:1902652	0.26738		0.86598	5	79	secondary alcohol metabolic process	BP	Mvk, Npc2, Cyb5r3, Cat, Sqle
GO:0072567	0.267618		0.964538	1	9	chemokine (C-X-C motif) ligand 2 production	BP	Postn
GO:2000341	0.267618		0.964538	1	9	regulation of chemokine (C-X-C motif) ligand 2 production	BP	Postn
GO:0006152	0.267657		0.965032	1	8	purine nucleoside catabolic process	BP	Hprt
GO:0046130	0.267657		0.965032	1	8	purine ribonucleoside catabolic process	BP	Hprt
GO:0019870	0.267697		0.966544	1	6	potassium channel inhibitor activity	MF	Wnk1
GO:0030514	0.267838		0.896514	3	37	negative regulation of BMP signaling pathway	BP	Sostdc1, Fzd1, Skil
GO:0033555	0.268304		0.865651	5	72	multicellular organismal response to stress	BP	Gch1, Ret, Nr2e1, Dbi, Bcl2
GO:0002366	0.268317		0.847476	7	120	leukocyte activation involved in immune response	BP	Shb, Dock11, Stat3, Lgals8, Atp7a, Cplx2, Anxa3
GO:1903205	0.268513		0.921449	2	26	regulation of hydrogen peroxide-induced cell death	BP	Glrx, Nup93
GO:0008294	0.268662		0.967525	1	5	calcium- and calmodulin-responsive adenylate cyclase activity	MF	Adcy5
GO:0010896	0.268777		0.965377	1	7	regulation of triglyceride catabolic process	BP	Abhd5
GO:0032787	0.268896		0.811345	16	327	monocarboxylic acid metabolic process	BP	Ghsr, Cryl1, Stat3, Cnr1, Hadh, Nucb2, Elovl2, Acot7, Dbi, Elovl4, Abhd5, Irs1, Mapk9, Ppargc1a, Acsl3, Elovl6
GO:0030318	0.269456		0.922158	2	20	melanocyte differentiation	BP	Zeb2, Bcl2
GO:0035845	0.269579		0.965157	1	7	photoreceptor cell outer segment organization	BP	Ahi1
GO:0090188	0.269699		0.966009	1	6	negative regulation of pancreatic juice secretion	BP	Wnk1
GO:0003149	0.269753		0.965109	1	7	membranous septum morphogenesis	BP	Fzd1
[truncated: 3,950 more rows]

## Sheet: Ribotag_Down_GO
Supplementary data 3
NexCre Ribotag Gene Ontology analysis - downregulated genes
category	over_represented_pvalue	log 10 p value	under_represented_pvalue	numDEInCat	numInCat	term	ontology	DEGenes
GO:0023052	2.2e-32	31.7	1	468	3525	signaling	BP	Ctgf, F2r, Grk5, Trib1, Maml3, Sik1, Tiparp, Cited2, Stac, Adcy8, Bmp3, Gpr26, Tgfb2, Spsb1, Elmo1, Scn1a, Chrm4, Pde4d, Gcnt2, Dlg1, Hunk, Dusp6, Ptchd1, Sorcs3, Dlc1, Rbpms, Chml, Thrb, Ptger3, Arhgap20, Pmaip1, Trhde, Slit2, Rasgrp1, Calb1, Sstr2, Slc16a1, Gabra4, Fjx1, Npy1r, Spry1, Gpr22, Cckbr, Efna5, Dusp4, Htr2a, Arhgap29, Rgs4, Fgf10, Chrm3, Trim16, Tnn, Hcrtr2, Sstr1, Acvr1c, Rorb, Tacr…
GO:0007154	1.47e-31	30.8	1	468	3556	cell communication	BP	Ctgf, F2r, Grk5, Trib1, Maml3, Sik1, Tiparp, Cited2, Stac, Adcy8, Bmp3, Gpr26, Tgfb2, Spsb1, Elmo1, Scn1a, Chrm4, Pde4d, Gcnt2, Dlg1, Hunk, Dusp6, Ptchd1, Sorcs3, Dlc1, Rbpms, Chml, Thrb, Ptger3, Arhgap20, Pmaip1, Trhde, Slit2, Rasgrp1, Calb1, Sstr2, Slc16a1, Gabra4, Fjx1, Npy1r, Spry1, Gpr22, Cckbr, Efna5, Dusp4, Htr2a, Arhgap29, Rgs4, Fgf10, Chrm3, Trim16, Tnn, Hcrtr2, Sstr1, Acvr1c, Rorb, Tacr…
GO:0007155	7.18e-30	29.1	1	177	820	cell adhesion	BP	Ctgf, Pdlim1, Cited2, Pcdh20, Nedd9, Tgfb2, Gcnt2, Dlg1, Dlc1, Ptger3, Slit2, Rasgrp1, Efna5, Tnn, Acan, Cldn1, Cav1, Pik3r1, Ptk2b, Ptpru, Prex1, Sirpa, Epha8, Swap70, Fat1, Net1, Egr3, Efnb1, Ephb3, Nrxn3, Serpine2, Ptprd, Ctnna1, Jam2, Cntnap5c, Pcdhga11, Pcdhb7, Igsf9, Eda, Pcdhga3, Itgav, Ntn1, Mfge8, S100a10, Pcdhb3, Npy2r, Tenm1, Gsn, Itgb3, Cdk6, Cadm3, Reln, Cd93, Cdk5r1, Ptprj, Cadm1, P…
GO:0022610	8.98e-30	29	1	177	822	biological adhesion	BP	Ctgf, Pdlim1, Cited2, Pcdh20, Nedd9, Tgfb2, Gcnt2, Dlg1, Dlc1, Ptger3, Slit2, Rasgrp1, Efna5, Tnn, Acan, Cldn1, Cav1, Pik3r1, Ptk2b, Ptpru, Prex1, Sirpa, Epha8, Swap70, Fat1, Net1, Egr3, Efnb1, Ephb3, Nrxn3, Serpine2, Ptprd, Ctnna1, Jam2, Cntnap5c, Pcdhga11, Pcdhb7, Igsf9, Eda, Pcdhga3, Itgav, Ntn1, Mfge8, S100a10, Pcdhb3, Npy2r, Tenm1, Gsn, Itgb3, Cdk6, Cadm3, Reln, Cd93, Cdk5r1, Ptprj, Cadm1, P…
GO:0007267	6.58e-27	26.2	1	191	1003	cell-cell signaling	BP	Ctgf, F2r, Grk5, Chrm4, Dlg1, Sorcs3, Ptger3, Trhde, Calb1, Slc16a1, Fjx1, Npy1r, Cckbr, Efna5, Htr2a, Fgf10, Chrm3, Tnn, Acvr1c, Myrip, Cav1, Cxxc4, Shisa9, Syt17, Ptk2b, Ptpru, Fzd8, Rspo2, Atp2b2, Nkd2, Cspg5, Lin7b, Fgfr1, Fgfr2, Egr3, Shisa2, Mcc, Syt4, Nrxn3, Trpv6, Serpine2, Neto1, Sulf2, Gria1, Cacna1e, Gjc1, Pcdhga11, Pcdhb7, Eda, Pcdhga3, Prickle1, Pcdhb3, Atp2a2, Npy2r, Cux2, Pak1, Rel…
GO:0004872	2.61e-26	25.6	1	127	547	receptor activity	MF	F2r, Gpr26, Chrm4, Thrb, Ptger3, Hcn1, Sstr2, Gabra4, Npy1r, Gpr22, Cckbr, Htr2a, Chrm3, Hcrtr2, Sstr1, Acvr1c, Rorb, Tacr3, Plxna1, Unc5b, Rasa3, Ptk2b, Nr3c2, Fzd8, Trhr, Gpr139, Epha8, Rtn4r, Fgfr1, Fgfr2, Rtn4rl1, Ephb3, Gpr6, Gria1, Dcc, Inpp5k, Npy2r, Rora, Ackr1, Xpr1, Itgb3, Cadm3, Grin3a, Cadm1, Ptprf, Hrh1, Chrm1, Grm4, Grik3, Met, Paqr7, Il4ra, Rgmb, Sema5a, Chrna3, Gria4, Acvr2a, Htr7…
GO:0038023	1.46e-25	24.8	1	111	449	signaling receptor activity	MF	F2r, Gpr26, Chrm4, Thrb, Ptger3, Sstr2, Gabra4, Npy1r, Gpr22, Cckbr, Htr2a, Chrm3, Hcrtr2, Sstr1, Acvr1c, Rorb, Tacr3, Plxna1, Unc5b, Rasa3, Ptk2b, Nr3c2, Fzd8, Trhr, Gpr139, Epha8, Rtn4r, Fgfr1, Fgfr2, Ephb3, Gpr6, Gria1, Dcc, Inpp5k, Npy2r, Rora, Ackr1, Grin3a, Ptprf, Hrh1, Chrm1, Grm4, Grik3, Met, Paqr7, Il4ra, Rgmb, Sema5a, Chrna3, Gria4, Acvr2a, Htr7, Ntrk2, Glra2, S1pr1, Gprc5b, Adora1, Il1…
GO:0060089	1.8e-25	24.7	1	131	589	molecular transducer activity	MF	F2r, Gpr26, Chrm4, Thrb, Ptger3, Hcn1, Sstr2, Gabra4, Npy1r, Gpr22, Cckbr, Htr2a, Chrm3, Hcrtr2, Sstr1, Prkg2, Acvr1c, Rorb, Tacr3, Plxna1, Unc5b, Rasa3, Ptk2b, Nr3c2, Fzd8, Trhr, Gpr139, Epha8, Rtn4r, Fgfr1, Fgfr2, Rtn4rl1, Ephb3, Gpr6, Gria1, Dcc, Inpp5k, Npy2r, Rora, Prkacb, Ackr1, Xpr1, Itgb3, Cdk19, Cdk6, Cadm3, Grin3a, Cadm1, Ptprf, Hrh1, Chrm1, Grm4, Grik3, Met, Paqr7, Il4ra, Rgmb, Sema5a,…
GO:0007399	1.35e-24	23.9	1	269	1702	nervous system development	BP	Pgap1, Slc5a3, Klhl1, Brinp3, Cited2, Brinp1, Pou3f1, Tpbg, Tgfb2, Dlg1, Nrsn1, Ptchd1, Dlc1, Slc4a7, Ptger3, Hcn1, Chodl, Slit2, Trpc6, Gabra4, Slitrk4, Efna5, Fgf10, Tnn, Acan, Rorb, Cldn1, Rasal1, Tal1, Cav1, Matn2, Plxna1, Unc5b, Syt17, Kif26a, Ptk2b, Prex1, Rspo2, Aldh1a3, Mycn, Atp2b2, Dok4, Sall2, Ndrg1, Efhd1, Cspg5, Tgm3, Epha8, Rtn4r, Sez6l, Fgfr1, Fgfr2, Nptx1, Egr3, Efnb1, Sgk1, Syt4,…
GO:0099600	1.14e-23	22.9	1	102	409	transmembrane receptor activity	MF	F2r, Gpr26, Chrm4, Ptger3, Hcn1, Sstr2, Gabra4, Npy1r, Gpr22, Cckbr, Htr2a, Chrm3, Hcrtr2, Sstr1, Acvr1c, Rorb, Tacr3, Plxna1, Unc5b, Rasa3, Ptk2b, Fzd8, Trhr, Gpr139, Epha8, Rtn4r, Fgfr1, Fgfr2, Ephb3, Gpr6, Gria1, Dcc, Inpp5k, Npy2r, Ackr1, Grin3a, Ptprf, Hrh1, Chrm1, Grm4, Grik3, Met, Il4ra, Sema5a, Chrna3, Gria4, Acvr2a, Htr7, Ntrk2, Glra2, S1pr1, Gprc5b, Adora1, Il1rapl2, Sstr4, Ephb6, Gabrb…
4080	4.37e-23	22.4	1	56	151	Neuroactive ligand-receptor interaction	KEGG	F2r, Chrm4, Thrb, Ptger3, Sstr2, Gabra4, Npy1r, Cckbr, Htr2a, Chrm3, Hcrtr2, Sstr1, Tacr3, Trhr, Gria1, Npy2r, Grin3a, Hrh1, Chrm1, Grm4, Grik3, Chrna3, Gria4, Htr7, Glra2, S1pr1, Adora1, Sstr4, Gabrb3, Chrna7, Gabrg3, Oxtr, Mchr1, Gabra1, Grin2a, Avpr1a, Grm5, Gria3, Grm7, Nr3c1, Gabra5, Htr2c, Adra1a, Vipr1, Grm3, Gabra2, Chrm2, Htr4, Grm8, Rxfp1, Glra3, Htr1b, Gabrg1, Crhr1, Htr1a, Grik2
GO:0004888	7.64e-23	22.1	1	97	385	transmembrane signaling receptor activity	MF	F2r, Gpr26, Chrm4, Ptger3, Sstr2, Gabra4, Npy1r, Gpr22, Cckbr, Htr2a, Chrm3, Hcrtr2, Sstr1, Acvr1c, Rorb, Tacr3, Plxna1, Unc5b, Rasa3, Ptk2b, Fzd8, Trhr, Gpr139, Epha8, Rtn4r, Fgfr1, Fgfr2, Ephb3, Gpr6, Gria1, Dcc, Inpp5k, Npy2r, Ackr1, Grin3a, Ptprf, Hrh1, Chrm1, Grm4, Grik3, Met, Il4ra, Sema5a, Chrna3, Gria4, Acvr2a, Htr7, Ntrk2, Glra2, S1pr1, Gprc5b, Adora1, Il1rapl2, Sstr4, Ephb6, Gabrb3, Chr…
GO:0004871	2.52e-20	19.6	1	129	655	signal transducer activity	MF	F2r, Gpr26, Chrm4, Thrb, Ptger3, Sstr2, Gabra4, Npy1r, Gpr22, Cckbr, Htr2a, Chrm3, Hcrtr2, Sstr1, Acvr1c, Rorb, Tacr3, Plxna1, Unc5b, Rasa3, Ptk2b, Nr3c2, Fzd8, Trhr, Gpr139, Dok4, Epha8, Rtn4r, Fgfr1, Fgfr2, Ephb3, Gpr6, Gria1, Dcc, Inpp5k, Npy2r, Rora, Ackr1, Grin3a, Ptprf, Hrh1, Traf6, Chrm1, Nlk, Grm4, Grik3, Met, Paqr7, Il4ra, Rgmb, Sema5a, Chrna3, Gria4, Acvr2a, Htr7, Ntrk2, Gnb4, Glra2, S1…
GO:0032501	5.02e-20	19.3	1	495	4273	multicellular organismal process	BP	Pgap1, Ctgf, Fosl2, F2r, Slc5a3, Klhl1, C1galt1, Brinp3, Trib1, Sik1, Tiparp, Cited2, Stac, Brinp1, Adcy8, Bmp3, Tex15, Pou3f1, Lipg, Tpbg, Tgfb2, Ets2, Scn1a, Pde4d, Gcnt2, Dlg1, Itgb8, Nrsn1, Dusp6, Ptchd1, Sorcs3, Dlc1, Slc4a7, Thrb, Ptger3, Hcn1, Chodl, Trhde, Slit2, Rasgrp1, Trpc6, Calb1, Slc24a4, Sstr2, Gabra4, Fjx1, Tll1, Npy1r, Spry1, Slitrk4, Cckbr, Efna5, Dusp4, Htr2a, Fam46a, Ism1, Fgf…
GO:0007268	1.01e-19	19	1	107	488	chemical synaptic transmission	BP	F2r, Chrm4, Dlg1, Sorcs3, Calb1, Npy1r, Cckbr, Htr2a, Chrm3, Shisa9, Syt17, Ptk2b, Atp2b2, Cspg5, Lin7b, Egr3, Syt4, Nrxn3, Serpine2, Neto1, Gria1, Gjc1, Pcdhb7, Pcdhb3, Atp2a2, Npy2r, Cux2, Pak1, Reln, Hrh1, Chrm1, Glul, Grm4, Grik3, Otof, Met, Arid1b, Mgll, Camk4, Chrna3, Gria4, Pcdhb9, Htr7, Ntrk2, Lrrtm2, Slitrk5, Glra2, Mef2c, Prkce, Gjd2, Pcdhb20, Adora1, Sstr4, Kcnn2, Pcdhb18, Pcdhb16, Gab…
GO:0098916	1.01e-19	19	1	107	488	anterograde trans-synaptic signaling	BP	F2r, Chrm4, Dlg1, Sorcs3, Calb1, Npy1r, Cckbr, Htr2a, Chrm3, Shisa9, Syt17, Ptk2b, Atp2b2, Cspg5, Lin7b, Egr3, Syt4, Nrxn3, Serpine2, Neto1, Gria1, Gjc1, Pcdhb7, Pcdhb3, Atp2a2, Npy2r, Cux2, Pak1, Reln, Hrh1, Chrm1, Glul, Grm4, Grik3, Otof, Met, Arid1b, Mgll, Camk4, Chrna3, Gria4, Pcdhb9, Htr7, Ntrk2, Lrrtm2, Slitrk5, Glra2, Mef2c, Prkce, Gjd2, Pcdhb20, Adora1, Sstr4, Kcnn2, Pcdhb18, Pcdhb16, Gab…
GO:0099537	1.25e-19	18.9	1	107	489	trans-synaptic signaling	BP	F2r, Chrm4, Dlg1, Sorcs3, Calb1, Npy1r, Cckbr, Htr2a, Chrm3, Shisa9, Syt17, Ptk2b, Atp2b2, Cspg5, Lin7b, Egr3, Syt4, Nrxn3, Serpine2, Neto1, Gria1, Gjc1, Pcdhb7, Pcdhb3, Atp2a2, Npy2r, Cux2, Pak1, Reln, Hrh1, Chrm1, Glul, Grm4, Grik3, Otof, Met, Arid1b, Mgll, Camk4, Chrna3, Gria4, Pcdhb9, Htr7, Ntrk2, Lrrtm2, Slitrk5, Glra2, Mef2c, Prkce, Gjd2, Pcdhb20, Adora1, Sstr4, Kcnn2, Pcdhb18, Pcdhb16, Gab…
GO:0099536	1.52e-19	18.8	1	107	490	synaptic signaling	BP	F2r, Chrm4, Dlg1, Sorcs3, Calb1, Npy1r, Cckbr, Htr2a, Chrm3, Shisa9, Syt17, Ptk2b, Atp2b2, Cspg5, Lin7b, Egr3, Syt4, Nrxn3, Serpine2, Neto1, Gria1, Gjc1, Pcdhb7, Pcdhb3, Atp2a2, Npy2r, Cux2, Pak1, Reln, Hrh1, Chrm1, Glul, Grm4, Grik3, Otof, Met, Arid1b, Mgll, Camk4, Chrna3, Gria4, Pcdhb9, Htr7, Ntrk2, Lrrtm2, Slitrk5, Glra2, Mef2c, Prkce, Gjd2, Pcdhb20, Adora1, Sstr4, Kcnn2, Pcdhb18, Pcdhb16, Gab…
GO:0048731	6.53e-19	18.2	1	380	3010	system development	BP	Pgap1, Ctgf, Fosl2, Slc5a3, Klhl1, C1galt1, Brinp3, Trib1, Sik1, Tiparp, Cited2, Brinp1, Bmp3, Tex15, Pou3f1, Tpbg, Tgfb2, Gcnt2, Dlg1, Itgb8, Nrsn1, Dusp6, Ptchd1, Dlc1, Slc4a7, Thrb, Ptger3, Hcn1, Chodl, Slit2, Rasgrp1, Trpc6, Calb1, Slc24a4, Gabra4, Fjx1, Npy1r, Spry1, Slitrk4, Cckbr, Efna5, Ism1, Fgf10, Trim16, Tnn, Acan, Rorb, Cldn1, Rasal1, Tal1, Cav1, Matn2, Plxna1, Unc5b, Syt17, Kif26a, P…
GO:0007186	7.82e-19	18.1	1	88	398	G-protein coupled receptor signaling pathway	BP	F2r, Grk5, Adcy8, Gpr26, Chrm4, Ptger3, Sstr2, Gabra4, Npy1r, Gpr22, Cckbr, Htr2a, Rgs4, Chrm3, Hcrtr2, Sstr1, Tacr3, Cav1, Fzd8, Prex1, Trhr, Gpr139, Kctd16, Gpr6, Inpp5k, Npy2r, Prkacb, Ackr1, Tenm1, Itgb3, Pik3r5, Cdk5r1, Hrh1, Pcsk1n, Chrm1, Npy, Grm4, Grik3, Dgkb, Met, Mgll, Adcy2, Atrnl1, Htr7, Gnb4, Glra2, S1pr1, Rgs8, Gprc5b, Dgkz, Dgkh, Adora1, Sstr4, Gabrb3, Plcb1, Gabrg3, Dgkg, Oxtr, A…
GO:0007165	5.72e-18	17.2	1	382	3149	signal transduction	BP	Ctgf, F2r, Grk5, Trib1, Maml3, Sik1, Tiparp, Cited2, Stac, Adcy8, Bmp3, Gpr26, Tgfb2, Spsb1, Elmo1, Chrm4, Pde4d, Gcnt2, Dlg1, Hunk, Dusp6, Ptchd1, Dlc1, Rbpms, Chml, Thrb, Ptger3, Arhgap20, Pmaip1, Trhde, Slit2, Rasgrp1, Sstr2, Gabra4, Npy1r, Spry1, Gpr22, Cckbr, Efna5, Dusp4, Htr2a, Arhgap29, Rgs4, Fgf10, Chrm3, Trim16, Tnn, Hcrtr2, Sstr1, Acvr1c, Rorb, Tacr3, Klf14, Arhgap28, Rasal1, Cav1, Plx…
GO:0007416	1.2e-17	16.9	1	48	128	synapse assembly	BP	Tpbg, Slitrk4, Efna5, Ephb3, Nrxn3, Ptprd, Pcdhb7, Pcdhb3, Cux2, Reln, Eef2k, Cadm1, Pcdhb9, Cbln2, Ntrk2, Lrrtm2, Slitrk5, Mef2c, Pcdhb20, Lrrn3, Pcdhb18, Pcdhb16, Sptbn2, Pcdhb12, Mdga1, Pcdhb19, Nlgn1, Clstn2, Pcdhb15, Oxtr, Flrt3, Sdk2, Epha7, Lrrtm4, Pcdhb17, Pcdhb21, Lrrn1, Pcdhb22, Il1rapl1, Cdh9, Ephb1, Lingo2, Il1rap, Asic2, Syndig1, Lrrtm3, Flrt2, Plxnd1
GO:0003008	2.52e-17	16.6	1	160	965	system process	BP	Pgap1, Ctgf, F2r, Stac, Brinp1, Adcy8, Tgfb2, Scn1a, Pde4d, Dlg1, Ptchd1, Sorcs3, Slc4a7, Thrb, Ptger3, Trhde, Slit2, Calb1, Slc24a4, Sstr2, Npy1r, Cckbr, Htr2a, Fgf10, Chrm3, Rorb, Tacr3, Cav1, Parp1, Pde2a, Pik3r1, Nr3c2, Cemip, Kcnab1, Cacna1i, Ccbe1, Aldh1a3, Tmie, Atp2b2, Fgfr1, Sgk1, Syt4, Nts, Trpv6, Serpine2, Foxp1, Neto1, Sulf2, Gria1, Cacna1e, Cacna1h, Gjc1, Inpp5k, Sobp, Atp2a2, Npy2r,…
GO:0005509	8.49e-16	15.1	1	85	395	calcium ion binding	MF	Pcdh20, Slit2, Rasgrp1, Calb1, Slc24a4, Tll1, Acan, Matn2, Syt17, Capn1, Necab3, Ccbe1, Atp2b2, Nkd2, Efhd1, Tgm3, Syt4, Sulf2, Cacna1e, Scube1, S100a10, Atp2a2, Gsn, Cd93, Cdk5r1, Eef2k, Nell2, Necab1, Dgkb, Otof, Matn4, Heg1, Pamr1, Cdh13, Micu1, Pcdhga4, Calm1, Tmem2, Cblb, Caln1, Cdh11, Pcdhb18, Cib2, Npnt, Vldlr, Plcb1, Dgkg, Clstn2, Kcnip2, Cdh22, Astn2, Pcdh19, Pcdha7, Crtac1, Lrp1b, Vsnl1…
GO:0050808	9.91e-16	15	1	66	245	synapse organization	BP	F2r, Tpbg, Slitrk4, Efna5, Atp2b2, Sez6l, Fgfr2, Ephb3, Nrxn3, Ptprd, Pcdhb7, Igsf9, Pcdhb3, Cux2, Pak1, Reln, Eef2k, Cadm1, Elfn1, Ptn, Chd4, Pcdhb9, Cbln2, Ntrk2, Lrrtm2, Slitrk5, Mef2c, Pcdhb20, Lrrn3, Pcdhb18, Pcdhb16, Chrna7, Sptbn2, Pcdhb12, Mdga1, Pcdhb19, Nlgn1, Clstn2, Pcdhb15, Oxtr, Flrt3, Sdk2, Utrn, Epha7, Lrrtm4, Pcdhb17, Pcdhb21, Grm5, Lrrn1, Pcdhb22, Il1rapl1, Cdh9, Tnr, Ephb1, Lin…
GO:0007275	2.93e-15	14.5	1	399	3387	multicellular organism development	BP	Pgap1, Ctgf, Fosl2, Slc5a3, Klhl1, C1galt1, Brinp3, Trib1, Sik1, Tiparp, Cited2, Brinp1, Bmp3, Tex15, Pou3f1, Tpbg, Tgfb2, Ets2, Gcnt2, Dlg1, Itgb8, Nrsn1, Dusp6, Ptchd1, Dlc1, Slc4a7, Thrb, Ptger3, Hcn1, Chodl, Slit2, Rasgrp1, Trpc6, Calb1, Slc24a4, Gabra4, Fjx1, Tll1, Npy1r, Spry1, Slitrk4, Cckbr, Efna5, Dusp4, Ism1, Fgf10, Trim16, Tnn, Acvr1c, Acan, Rorb, Cldn1, Rasal1, Tal1, Cav1, Matn2, Plxn…
GO:0004930	4.12e-15	14.4	1	50	185	G-protein coupled receptor activity	MF	F2r, Gpr26, Chrm4, Ptger3, Sstr2, Npy1r, Gpr22, Cckbr, Htr2a, Chrm3, Hcrtr2, Sstr1, Rorb, Tacr3, Fzd8, Trhr, Gpr139, Gpr6, Inpp5k, Npy2r, Ackr1, Hrh1, Chrm1, Grm4, Grik3, Htr7, S1pr1, Gprc5b, Adora1, Sstr4, Oxtr, Mchr1, Sfrp1, Avpr1a, Grm5, Grm7, Htr2c, Adra1a, Ramp3, Vipr1, Grm3, Fzd7, Chrm2, Htr4, Grm8, Npr3, Rxfp1, Htr1b, Crhr1, Htr1a
GO:0048856	8.02e-15	14.1	1	420	3658	anatomical structure development	BP	Pgap1, Ctgf, Fosl2, Slc5a3, Klhl1, C1galt1, Brinp3, Trib1, Sik1, Tiparp, Cited2, Brinp1, Bmp3, Tex15, Pou3f1, Tpbg, Tgfb2, Ets2, Gcnt2, Dlg1, Itgb8, Nrsn1, Dusp6, Ptchd1, Dlc1, Slc4a7, Thrb, Ptger3, Hcn1, Chodl, Slit2, Rasgrp1, Trpc6, Calb1, Slc24a4, Gabra4, Fjx1, Tll1, Npy1r, Spry1, Slitrk4, Cckbr, Efna5, Dusp4, Ism1, Fgf10, Trim16, Tnn, Acvr1c, Acan, Rorb, Cldn1, Rasal1, Tal1, Cav1, Matn2, Plxn…
GO:0032502	1.96e-14	13.7	1	442	3936	developmental process	BP	Pgap1, Ctgf, Fosl2, Slc5a3, Klhl1, C1galt1, Brinp3, Grk5, Trib1, Sik1, Tiparp, Cited2, Brinp1, Bmp3, Tex15, Pou3f1, Tpbg, Tgfb2, Ets2, Pde4d, Gcnt2, Dlg1, Itgb8, Nrsn1, Dusp6, Ptchd1, Dlc1, Slc4a7, Thrb, Ptger3, Hcn1, Chodl, Slit2, Rasgrp1, Trpc6, Calb1, Slc24a4, Gabra4, Fjx1, Tll1, Npy1r, Spry1, Slitrk4, Cckbr, Efna5, Dusp4, Htr2a, Ism1, Fgf10, Trim16, Tnn, Acvr1c, Acan, Rorb, Cldn1, Rasal1, Tal…
GO:0051716	8.96e-14	13	1	445	4103	cellular response to stimulus	BP	Ctgf, F2r, Brinp3, Grk5, Trib1, Maml3, Sik1, Tiparp, Cited2, Stac, Brinp1, Adcy8, Bmp3, Tex15, Gpr26, Tgfb2, Spsb1, Elmo1, Chrm4, Pde4d, Gcnt2, Dlg1, Hunk, Dusp6, Ptchd1, Dlc1, Rbpms, Chml, Thrb, Ptger3, Arhgap20, Hcn1, Pmaip1, Trhde, Slit2, Rasgrp1, Trpc6, Calb1, Sstr2, Slc16a1, Gabra4, Npy1r, Spry1, Gpr22, Cckbr, Efna5, Dusp4, Htr2a, Arhgap29, Rgs4, Fgf10, Chrm3, Trim16, Tnn, Hcrtr2, Sstr1, Prk…
GO:0030594	9.35e-14	13	1	25	52	neurotransmitter receptor activity	MF	Chrm4, Htr2a, Chrm3, Ptk2b, Gria1, Grin3a, Chrm1, Grik3, Chrna3, Gria4, Htr7, Glra2, Gabrb3, Chrna7, Gabra1, Grin2a, Grm5, Gria3, Htr2c, Gabra2, Chrm2, Glra3, Htr1b, Htr1a, Grik2
GO:0065008	1.43e-13	12.8	1	290	2384	regulation of biological quality	BP	Mest, Ctgf, F2r, Tmtc2, Tiparp, Cited2, Tex15, Gpr26, Lipg, Tpbg, Tgfb2, Scn1a, Pde4d, Gcnt2, Dlg1, Sorcs3, Dlc1, Slc4a7, Thrb, Ptger3, Hcn1, Pmaip1, Trhde, Slit2, Trpc6, Calb1, Slc24a4, Slc16a1, Npy1r, Slitrk4, Cckbr, Efna5, Htr2a, Fam46a, Pkib, Fgf10, Chrm3, Hcrtr2, Prkg2, Acvr1c, Tacr3, Cldn1, Tal1, Myrip, Cav1, Plxna1, Parp1, Shisa9, Syt17, Pde2a, Pik3r1, Ptk2b, Nr3c2, Cemip, Cacna1i, Prex1, …
GO:0051239	1.57e-13	12.8	1	245	1876	regulation of multicellular organismal process	BP	Ctgf, F2r, Slc5a3, Brinp3, Trib1, Cited2, Brinp1, Lipg, Tpbg, Tgfb2, Pde4d, Gcnt2, Dlg1, Dusp6, Thrb, Ptger3, Chodl, Slit2, Rasgrp1, Trpc6, Sstr2, Npy1r, Spry1, Slitrk4, Cckbr, Efna5, Htr2a, Fam46a, Ism1, Fgf10, Chrm3, Trim16, Tnn, Hcrtr2, Acvr1c, Rorb, Tacr3, Rasal1, Tal1, Cav1, Plxna1, Parp1, Syt17, Pik3r1, Ptk2b, Prex1, Rspo2, Ccbe1, Mycn, Tril, Rtn4r, Fgfr1, Fgfr2, Egr3, Mcc, Sgk1, Syt4, Rtn4…
GO:0098742	1.82e-13	12.7	1	40	115	cell-cell adhesion via plasma-membrane adhesion molecules	BP	Pcdh20, Tgfb2, Cldn1, Ptprd, Igsf9, Tenm1, Cadm3, Cadm1, Ptprf, Cdh13, Ptprt, Pcdhga4, Cdh11, Pcdhb18, Pcdhb16, Nlgn1, Clstn2, Flrt3, Sdk2, Unc5d, Cdh22, Pcdh19, Pcdha7, Alcam, Pcdhga12, Il1rapl1, Dab1, Cdh9, Pcdha9, Cdh10, Cdh8, Fat3, Cdh20, Pcdh10, Itga4, Cdh7, Cdh12, Bmp2, Pcdh15, Dsc3
GO:0051240	3.43e-13	12.5	1	161	1089	positive regulation of multicellular organismal process	BP	Ctgf, F2r, Brinp3, Trib1, Cited2, Brinp1, Lipg, Tpbg, Tgfb2, Gcnt2, Dlg1, Thrb, Ptger3, Rasgrp1, Trpc6, Npy1r, Spry1, Slitrk4, Efna5, Htr2a, Fgf10, Chrm3, Trim16, Tacr3, Rasal1, Tal1, Cav1, Parp1, Syt17, Pik3r1, Ptk2b, Ccbe1, Fgfr1, Fgfr2, Egr3, Sgk1, Syt4, Ephb3, Serpine2, Foxp1, Sulf2, Ptprd, Trpc5, Dcc, Inpp5k, Mkl2, Ntn1, Npy2r, Rora, Cux2, Pak1, Itgb3, Reln, Eef2k, Ptprj, Cadm1, B2m, Ptprf, …
GO:0022008	1.32e-12	11.9	1	182	1262	neurogenesis	BP	Klhl1, Brinp3, Brinp1, Pou3f1, Tgfb2, Slc4a7, Ptger3, Hcn1, Chodl, Slit2, Trpc6, Slitrk4, Efna5, Fgf10, Tnn, Rorb, Rasal1, Tal1, Cav1, Matn2, Plxna1, Unc5b, Syt17, Ptk2b, Prex1, Rspo2, Mycn, Atp2b2, Ndrg1, Efhd1, Tgm3, Epha8, Rtn4r, Fgfr1, Fgfr2, Nptx1, Efnb1, Sgk1, Syt4, Rtn4rl1, Ephb3, Serpine2, Foxp1, Ptprd, Pmp22, Ctnna1, Trpc5, Dcc, Igsf9, Mkl2, Prickle2, Ntn1, Rora, Tenm1, Cux2, Pak1, Cdk6,…
GO:0098609	1.65e-12	11.8	1	84	431	cell-cell adhesion	BP	Pdlim1, Cited2, Pcdh20, Tgfb2, Gcnt2, Dlg1, Ptger3, Slit2, Rasgrp1, Efna5, Cldn1, Cav1, Pik3r1, Ptpru, Swap70, Fat1, Egr3, Efnb1, Ephb3, Serpine2, Ptprd, Ctnna1, Igsf9, Itgav, Ntn1, Tenm1, Gsn, Itgb3, Cadm3, Cd93, Cdk5r1, Cadm1, Ptprf, Traf6, Il4ra, Prkcd, Hsph1, Negr1, Cdh13, Ptprt, Pcdhga4, Cblb, Zbtb16, Cdh11, Pcdhb18, Pcdhb16, Ephb6, Npnt, Nlgn1, Clstn2, Kit, Flrt3, Sdk2, Unc5d, Cdh22, Pcdh19…
GO:0030182	1.85e-12	11.7	1	162	1083	neuron differentiation	BP	Klhl1, Brinp3, Brinp1, Tgfb2, Slc4a7, Ptger3, Hcn1, Chodl, Slit2, Trpc6, Slitrk4, Efna5, Tnn, Rorb, Rasal1, Tal1, Cav1, Matn2, Plxna1, Unc5b, Syt17, Ptk2b, Prex1, Rspo2, Mycn, Atp2b2, Efhd1, Tgm3, Epha8, Rtn4r, Fgfr1, Fgfr2, Nptx1, Efnb1, Sgk1, Syt4, Rtn4rl1, Ephb3, Serpine2, Foxp1, Ptprd, Pmp22, Trpc5, Dcc, Igsf9, Mkl2, Prickle2, Ntn1, Rora, Tenm1, Cux2, Pak1, Csmd3, Cdkn1c, Reln, Cdk5r1, Eef2k,…
GO:0050896	3.43e-12	11.5	1	496	4825	response to stimulus	BP	Mest, Ctgf, Fosl2, F2r, Brinp3, Grk5, Trib1, Maml3, Sik1, Tiparp, Cited2, Stac, Brinp1, Adcy8, Bmp3, Tex15, Gpr26, Tgfb2, Spsb1, Elmo1, Scn1a, Chrm4, Pde4d, Gcnt2, Dlg1, Hunk, Dusp6, Ptchd1, Dlc1, Rbpms, Chml, Thrb, Ptger3, Arhgap20, Hcn1, Pmaip1, Trhde, Slit2, Rasgrp1, Trpc6, Calb1, Slc24a4, Sstr2, Slc16a1, Gabra4, Npy1r, Spry1, Gpr22, Cckbr, Efna5, Dusp4, Htr2a, Fam46a, Arhgap29, Rgs4, Fgf10, C…
GO:0023051	4.51e-12	11.3	1	259	2101	regulation of signaling	BP	Ctgf, F2r, Grk5, Trib1, Cited2, Bmp3, Tgfb2, Pde4d, Gcnt2, Dlg1, Dusp6, Sorcs3, Dlc1, Rbpms, Ptger3, Pmaip1, Slit2, Rasgrp1, Calb1, Slc16a1, Npy1r, Spry1, Cckbr, Efna5, Dusp4, Htr2a, Rgs4, Fgf10, Trim16, Tnn, Acvr1c, Klf14, Rasal1, Myrip, Cav1, Cxxc4, Unc5b, Parp1, Dusp7, Shisa9, Kif26a, Rasa3, Pik3r1, Ptk2b, Fzd8, Prex1, Sphkap, Rspo2, Ccbe1, Aldh1a3, Rnf152, Atp2b2, Arhgef17, Nkd2, Cspg5, Epha8…
GO:0048699	4.88e-12	11.3	1	172	1188	generation of neurons	BP	Klhl1, Brinp3, Brinp1, Tgfb2, Slc4a7, Ptger3, Hcn1, Chodl, Slit2, Trpc6, Slitrk4, Efna5, Tnn, Rorb, Rasal1, Tal1, Cav1, Matn2, Plxna1, Unc5b, Syt17, Ptk2b, Prex1, Rspo2, Mycn, Atp2b2, Efhd1, Tgm3, Epha8, Rtn4r, Fgfr1, Fgfr2, Nptx1, Efnb1, Sgk1, Syt4, Rtn4rl1, Ephb3, Serpine2, Foxp1, Ptprd, Pmp22, Ctnna1, Trpc5, Dcc, Igsf9, Mkl2, Prickle2, Ntn1, Rora, Tenm1, Cux2, Pak1, Csmd3, Cdkn1c, Reln, Cdk5r1…
GO:0010646	8.15e-12	11.1	1	256	2080	regulation of cell communication	BP	Ctgf, F2r, Grk5, Trib1, Cited2, Bmp3, Tgfb2, Pde4d, Gcnt2, Dlg1, Dusp6, Sorcs3, Dlc1, Rbpms, Ptger3, Pmaip1, Slit2, Rasgrp1, Calb1, Slc16a1, Npy1r, Spry1, Cckbr, Efna5, Dusp4, Htr2a, Rgs4, Fgf10, Trim16, Tnn, Acvr1c, Klf14, Rasal1, Myrip, Cav1, Cxxc4, Unc5b, Parp1, Dusp7, Shisa9, Kif26a, Rasa3, Pik3r1, Ptk2b, Fzd8, Prex1, Sphkap, Rspo2, Ccbe1, Aldh1a3, Rnf152, Atp2b2, Arhgef17, Nkd2, Cspg5, Epha8…
GO:0051963	8.45e-12	11.1	1	29	73	regulation of synapse assembly	BP	Tpbg, Slitrk4, Efna5, Ephb3, Ptprd, Cux2, Eef2k, Cbln2, Ntrk2, Lrrtm2, Slitrk5, Mef2c, Lrrn3, Mdga1, Nlgn1, Clstn2, Oxtr, Flrt3, Epha7, Lrrtm4, Lrrn1, Il1rapl1, Ephb1, Lingo2, Il1rap, Asic2, Syndig1, Lrrtm3, Flrt2
GO:0051965	1.3e-11	10.9	1	26	61	positive regulation of synapse assembly	BP	Tpbg, Slitrk4, Efna5, Ephb3, Ptprd, Cux2, Eef2k, Cbln2, Ntrk2, Lrrtm2, Slitrk5, Lrrn3, Nlgn1, Clstn2, Oxtr, Flrt3, Lrrtm4, Lrrn1, Il1rapl1, Ephb1, Lingo2, Il1rap, Asic2, Syndig1, Lrrtm3, Flrt2
GO:0050877	2.35e-11	10.6	1	99	590	nervous system process	BP	Pgap1, F2r, Brinp1, Adcy8, Scn1a, Ptchd1, Sorcs3, Slc4a7, Thrb, Calb1, Slc24a4, Npy1r, Cckbr, Htr2a, Rorb, Cemip, Kcnab1, Cacna1i, Aldh1a3, Tmie, Atp2b2, Fgfr1, Sgk1, Syt4, Nts, Serpine2, Neto1, Gria1, Cacna1e, Cacna1h, Gjc1, Sobp, Npy2r, Cux2, Pak1, Reln, Grin3a, Hrh1, Chrm1, Foxo6, Grm4, Ptn, Cntnap2, Otof, Ankfn1, Mgll, Camk4, Sema5a, B3gnt2, Coch, Htr7, Piezo2, Adcy1, Ntrk2, Mef2c, Rps6ka2, G…
GO:0009653	3.08e-11	10.5	1	230	1760	anatomical structure morphogenesis	BP	Ctgf, C1galt1, Tiparp, Cited2, Tgfb2, Ets2, Dlg1, Dusp6, Dlc1, Slc4a7, Thrb, Hcn1, Slit2, Trpc6, Calb1, Slc24a4, Fjx1, Npy1r, Spry1, Slitrk4, Efna5, Dusp4, Ism1, Fgf10, Tnn, Acan, Rorb, Rasal1, Tal1, Cav1, Matn2, Plxna1, Unc5b, Syt17, Capn1, Ptk2b, Fzd8, Prex1, Rspo2, Ccbe1, Aldh1a3, Hif3a, Tmie, Mycn, Atp2b2, Epha8, Rtn4r, Fat1, Fgfr1, Fgfr2, Net1, Nptx1, Egr3, Efnb1, Sgk1, Syt4, Ephb3, Nrxn3, S…
GO:0051960	3.18e-11	10.5	1	119	744	regulation of nervous system development	BP	Brinp3, Brinp1, Tpbg, Dlg1, Ptger3, Chodl, Slit2, Trpc6, Slitrk4, Efna5, Rasal1, Cav1, Plxna1, Syt17, Ptk2b, Prex1, Mycn, Rtn4r, Fgfr1, Sgk1, Syt4, Rtn4rl1, Ephb3, Serpine2, Ptprd, Pmp22, Ctnna1, Trpc5, Dcc, Ntn1, Prkacb, Cux2, Pak1, Csmd3, Reln, Cdk5r1, Eef2k, B2m, Ptprf, Sema3a, Xylt1, Foxo6, Ptn, Met, Asap1, Twf2, Mgll, Sema5a, Negr1, Chrna3, Rap2a, Cbln2, Htr7, Arntl, Ascl1, Ntrk2, Lrrtm2, Sl…
GO:0051966	3.64e-11	10.4	1	24	54	regulation of synaptic transmission, glutamatergic	BP	Cckbr, Htr2a, Ptk2b, Serpine2, Npy2r, Reln, Glul, Grm4, Grik3, Gria4, Ntrk2, Mef2c, Adora1, Nlgn1, Oxtr, Grm5, Grm7, Tnr, Tshz3, Grm3, Syt1, Grm8, Htr1b, Grik2
GO:0050793	3.79e-11	10.4	1	218	1706	regulation of developmental process	BP	Ctgf, Brinp3, Trib1, Sik1, Cited2, Brinp1, Tpbg, Tgfb2, Gcnt2, Dlg1, Dusp6, Dlc1, Thrb, Ptger3, Chodl, Slit2, Rasgrp1, Trpc6, Npy1r, Spry1, Slitrk4, Efna5, Htr2a, Ism1, Fgf10, Trim16, Tnn, Acvr1c, Rorb, Rasal1, Tal1, Cav1, Plxna1, Parp1, Syt17, Pik3r1, Ptk2b, Prex1, Rspo2, Ccbe1, Mycn, Fndc5, Rtn4r, Fgfr1, Fgfr2, Net1, Egr3, Sgk1, Syt4, Rtn4rl1, Ephb3, Serpine2, Foxp1, Sulf2, Ptprd, Pmp22, Ctnna1…
GO:0050804	4.1e-11	10.4	1	64	305	modulation of chemical synaptic transmission	BP	F2r, Sorcs3, Calb1, Cckbr, Htr2a, Shisa9, Ptk2b, Atp2b2, Cspg5, Syt4, Serpine2, Neto1, Gria1, Atp2a2, Npy2r, Cux2, Pak1, Reln, Hrh1, Glul, Grm4, Grik3, Met, Mgll, Chrna3, Gria4, Htr7, Ntrk2, Lrrtm2, Mef2c, Prkce, Adora1, Kcnn2, Chrna7, Gucy1b3, Nlgn1, Clstn2, Kit, Oxtr, Rasgrf1, Cntnap4, Nrgn, Grin2a, Rims2, Grm5, Shisa6, Grm7, Nsmf, Plk2, Nr3c1, Tnr, Rasgrf2, Htr2c, Adra1a, Tshz3, Grm3, Syt1, Gr…
GO:0048468	4.92e-11	10.3	1	206	1551	cell development	BP	Fosl2, Klhl1, C1galt1, Brinp3, Trib1, Cited2, Brinp1, Bmp3, Pou3f1, Tgfb2, Slc4a7, Ptger3, Hcn1, Chodl, Slit2, Trpc6, Slitrk4, Efna5, Tnn, Acan, Rorb, Cldn1, Rasal1, Tal1, Cav1, Matn2, Plxna1, Unc5b, Syt17, Pde2a, Ptk2b, Prex1, Mycn, Atp2b2, Ndrg1, Efhd1, Epha8, Rtn4r, Fat1, Fgfr1, Fgfr2, Net1, Nptx1, Efnb1, Sgk1, Syt4, Rtn4rl1, Ephb3, Serpine2, Foxp1, Sulf2, Ptprd, Pmp22, Ctnna1, Trpc5, Gjc1, Dc…
GO:0048666	5.06e-11	10.3	1	139	915	neuron development	BP	Klhl1, Tgfb2, Slc4a7, Hcn1, Chodl, Slit2, Trpc6, Slitrk4, Efna5, Tnn, Rorb, Rasal1, Matn2, Plxna1, Unc5b, Syt17, Ptk2b, Prex1, Atp2b2, Efhd1, Epha8, Rtn4r, Fgfr1, Fgfr2, Nptx1, Efnb1, Sgk1, Syt4, Rtn4rl1, Ephb3, Serpine2, Foxp1, Ptprd, Pmp22, Trpc5, Dcc, Igsf9, Mkl2, Prickle2, Ntn1, Tenm1, Cux2, Pak1, Csmd3, Cdkn1c, Reln, Cdk5r1, Eef2k, Grin3a, B2m, Ptprf, Sema3a, Xylt1, Foxo6, Ntn4, Ptn, Cntnap2…
GO:0051094	6.39e-11	10.2	1	138	944	positive regulation of developmental process	BP	Ctgf, Brinp3, Trib1, Cited2, Brinp1, Tpbg, Tgfb2, Gcnt2, Dlg1, Thrb, Rasgrp1, Trpc6, Spry1, Slitrk4, Efna5, Htr2a, Fgf10, Trim16, Rasal1, Tal1, Parp1, Syt17, Pik3r1, Ptk2b, Prex1, Ccbe1, Fndc5, Fgfr1, Fgfr2, Net1, Egr3, Sgk1, Syt4, Ephb3, Serpine2, Foxp1, Ptprd, Trpc5, Dcc, Mkl2, Ntn1, S100a10, Cux2, Pak1, Itgb3, Reln, Eef2k, Ptprf, Traf6, Sema3a, Foxo6, Ptn, Met, Il4ra, Twf2, Ovol2, Apc, Sema5a,…
GO:0022836	6.71e-11	10.2	1	51	221	gated channel activity	MF	Kcnf1, Scn1a, Hcn1, Gabra4, Rasa3, Ptk2b, Kcnab1, Cacna1i, Kcng1, Gria1, Cacna1e, Cacna1h, Itgav, Grin3a, Grik3, Scn3b, Chrna3, Gria4, Piezo2, Glra2, Kcnn2, Gabrb3, Chrna7, Cacna2d3, Gabrg3, Kcnip2, Kcns3, Gabra1, Grin2a, Kcnk13, Cnga4, Gria3, Kcnh3, Il1rapl1, Grm7, Ryr3, Kcnq5, Kcnd2, Gabra5, Asic2, Gabra2, Pex5l, Kcnh5, Kcnj2, Kcnip4, Kcnh1, Glra3, Kcng3, Gabrg1, Kcnk9, Grik2
GO:0006811	7.49e-11	10.1	1	138	978	ion transport	BP	Ctgf, F2r, Slc5a3, Kcnf1, Sik1, Stac, Tgfb2, Scn1a, Pde4d, Dlg1, Slc4a7, Ptger3, Hcn1, Trpc6, Slc24a4, Slc16a1, Gabra4, Cckbr, Htr2a, Prkg2, Cav1, Shisa9, Ptk2b, Cemip, Kcnab1, Cacna1i, Kcng1, Atp2b2, Fgfr1, Sgk1, Syt4, Slco3a1, Trpv6, Serpine2, Neto1, Gria1, Trpc5, Cacna1e, Cacna1h, Itgav, Inpp5k, Atp2a2, Slc30a3, Slc4a4, Npy2r, Xpr1, Pak1, Itgb3, Slc22a3, Akt3, Reln, Grin3a, B2m, Hrh1, Chrm1, T…
GO:2000026	7.5e-11	10.1	1	178	1316	regulation of multicellular organismal development	BP	Ctgf, Brinp3, Trib1, Cited2, Brinp1, Tpbg, Tgfb2, Gcnt2, Dlg1, Dusp6, Thrb, Ptger3, Chodl, Slit2, Rasgrp1, Trpc6, Spry1, Slitrk4, Efna5, Ism1, Fgf10, Trim16, Acvr1c, Rasal1, Tal1, Cav1, Plxna1, Syt17, Pik3r1, Ptk2b, Prex1, Rspo2, Ccbe1, Mycn, Rtn4r, Fgfr1, Fgfr2, Egr3, Sgk1, Syt4, Rtn4rl1, Ephb3, Serpine2, Foxp1, Sulf2, Ptprd, Pmp22, Ctnna1, Trpc5, Dcc, Mkl2, Prickle1, Ntn1, Prkacb, Cux2, Pak1, I…
GO:0005216	1.35e-10	9.87	1	59	286	ion channel activity	MF	Kcnf1, Scn1a, Hcn1, Trpc6, Slc24a4, Gabra4, Rasa3, Ptk2b, Kcnab1, Cacna1i, Kcng1, Trpv6, Gria1, Trpc5, Cacna1e, Cacna1h, Gjc1, Itgav, Grin3a, Grik3, Scn3b, Chrna3, Gria4, Piezo2, Glra2, Kcnn2, Mcu, Gabrb3, Chrna7, Cacna2d3, Gabrg3, Kcnip2, Kcns3, Gabra1, Grin2a, Kcnk13, Cnga4, Trpc4, Gria3, Kcnh3, Il1rapl1, Grm7, Ryr3, Kcnq5, Kcnd2, Gabra5, Asic2, Gabra2, Pex5l, Kcnh5, Kcnj2, Kcnip4, Kcnh1, Slc24…
GO:0007166	1.49e-10	9.83	1	195	1502	cell surface receptor signaling pathway	BP	Ctgf, Grk5, Trib1, Maml3, Tiparp, Cited2, Bmp3, Tgfb2, Gcnt2, Dusp6, Ptchd1, Rbpms, Slit2, Spry1, Efna5, Fgf10, Tnn, Sstr1, Acvr1c, Cav1, Plxna1, Cxxc4, Unc5b, Parp1, Shisa9, Neurl1b, Pik3r1, Ptk2b, Ptpru, Fzd8, Rspo2, Ccbe1, Dok4, Nkd2, Epha8, Rftn1, Rtn4r, Fgfr1, Fgfr2, Shisa2, Peli2, Efnb1, Mcc, Rtn4rl1, Ephb3, Igfbp4, Serpine2, Neto1, Sulf2, Gria1, Ctnna1, Scube1, Eda, Itgav, Inpp5k, Prickle1…
GO:0007610	1.68e-10	9.77	1	89	506	behavior	BP	Klhl1, Brinp1, Adcy8, Scn1a, Ptchd1, Sorcs3, Thrb, Ptger3, Calb1, Slc16a1, Npy1r, Cckbr, Htr2a, Hcrtr2, Tacr3, Tal1, Parp1, Kcnab1, Aldh1a3, Atp2b2, Sez6l, Sgk1, Syt4, Nts, Serpine2, Neto1, Gria1, Cacna1e, Sobp, Npy2r, Cux2, Pak1, Reln, Hrh1, Foxo6, Npy, Grm4, Ptn, Cntnap2, Met, Ankfn1, Camk4, Negr1, Chrna3, Phf21a, Htr7, Adcy1, Ntrk2, Slitrk5, Gprc5b, Mef2c, Prkce, Spire1, Adora1, Id2, Lsamp, Ch…
GO:0022838	1.73e-10	9.76	1	59	289	substrate-specific channel activity	MF	Kcnf1, Scn1a, Hcn1, Trpc6, Slc24a4, Gabra4, Rasa3, Ptk2b, Kcnab1, Cacna1i, Kcng1, Trpv6, Gria1, Trpc5, Cacna1e, Cacna1h, Gjc1, Itgav, Grin3a, Grik3, Scn3b, Chrna3, Gria4, Piezo2, Glra2, Kcnn2, Mcu, Gabrb3, Chrna7, Cacna2d3, Gabrg3, Kcnip2, Kcns3, Gabra1, Grin2a, Kcnk13, Cnga4, Trpc4, Gria3, Kcnh3, Il1rapl1, Grm7, Ryr3, Kcnq5, Kcnd2, Gabra5, Asic2, Gabra2, Pex5l, Kcnh5, Kcnj2, Kcnip4, Kcnh1, Slc24…
GO:0044057	2.48e-10	9.61	1	64	327	regulation of system process	BP	Ctgf, F2r, Tgfb2, Pde4d, Dlg1, Thrb, Ptger3, Sstr2, Npy1r, Cckbr, Htr2a, Fgf10, Chrm3, Tacr3, Cav1, Parp1, Pik3r1, Fgfr1, Foxp1, Cacna1e, Gjc1, Inpp5k, Atp2a2, Npy2r, Pak1, Hrh1, Sema3a, Chrm1, Scn3b, Mgll, Smtn, Chrna3, Acvr2a, Inhbb, Mef2c, Jarid2, Adora1, Kcnn2, Atp1b1, Chrna7, Ahr, Npnt, Nlgn1, Kit, Oxtr, Camk2d, Grin2a, Avpr1a, Nr3c1, Tnr, Htr2c, Nov, Adra1a, Tshz3, Pkp2, Grm3, Asic2, Hey2, …
GO:0043269	4.65e-10	9.33	1	78	453	regulation of ion transport	BP	F2r, Kcnf1, Sik1, Stac, Tgfb2, Scn1a, Pde4d, Dlg1, Ptger3, Hcn1, Trpc6, Htr2a, Prkg2, Cav1, Shisa9, Ptk2b, Cemip, Kcnab1, Kcng1, Atp2b2, Sgk1, Syt4, Serpine2, Neto1, Cacna1e, Cacna1h, Inpp5k, Npy2r, Itgb3, Akt3, Reln, B2m, Chrm1, Scn3b, Prkcd, Chrna3, Htr7, Mef2c, Prkce, Acsl5, Adora1, Atp1b1, Cacna2d3, Dpp10, Plcb1, Nlgn1, Kcnip2, Ahcyl1, Neto2, Rasgrf1, Mchr1, Kcns3, Camk2d, Avpr1a, Kcnk13, Trp…
4020	5.45e-10	9.26	1	37	132	Calcium signaling pathway	KEGG	F2r, Adcy8, Ptger3, Cckbr, Htr2a, Chrm3, Tacr3, Ptk2b, Cacna1i, Trhr, Atp2b2, Cacna1e, Cacna1h, Atp2a2, Prkacb, Hrh1, Chrm1, Adcy2, Camk4, Htr7, Adcy1, Calm1, Chrna7, Plcb1, Oxtr, Camk2d, Grin2a, Avpr1a, Grm5, Atp2b1, Plce1, Ryr3, Htr2c, Adra1a, Chrm2, Htr4, Itpka
GO:0003013	5.77e-10	9.24	1	58	289	circulatory system process	BP	Ctgf, F2r, Tgfb2, Scn1a, Pde4d, Dlg1, Thrb, Ptger3, Trhde, Slit2, Npy1r, Htr2a, Chrm3, Tacr3, Cav1, Pde2a, Pik3r1, Nts, Cacna1e, Atp2a2, Ptprj, Hrh1, Sema3a, Chrm1, Npy, Met, Scn3b, Heg1, Mgll, Smtn, Angpt1, Htr7, Pde3a, Rps6ka2, Adora1, Id2, Kcnn2, Atp1b1, Chrna7, Ahr, Oxtr, Camk2d, Avpr1a, Vegfa, Nr3c1, Htr2c, Adra1a, Ramp3, Pkp2, Gpx1, Asic2, Hey2, Pparg, Chrm2, Kcnj2, Npr3, Htr1b, Htr1a
GO:0050803	7.14e-10	9.15	1	35	123	regulation of synapse structure or activity	BP	Tpbg, Slitrk4, Efna5, Ephb3, Ptprd, Igsf9, Cux2, Reln, Eef2k, Ptprf, Ptn, Cbln2, Ntrk2, Lrrtm2, Slitrk5, Mef2c, Lrrn3, Chrna7, Mdga1, Nlgn1, Clstn2, Oxtr, Flrt3, Epha7, Lrrtm4, Lrrn1, Il1rapl1, Ephb1, Lingo2, Il1rap, Asic2, Syndig1, C1ql3, Lrrtm3, Flrt2
GO:0015267	7.7e-10	9.11	1	59	306	channel activity	MF	Kcnf1, Scn1a, Hcn1, Trpc6, Slc24a4, Gabra4, Rasa3, Ptk2b, Kcnab1, Cacna1i, Kcng1, Trpv6, Gria1, Trpc5, Cacna1e, Cacna1h, Gjc1, Itgav, Grin3a, Grik3, Scn3b, Chrna3, Gria4, Piezo2, Glra2, Kcnn2, Mcu, Gabrb3, Chrna7, Cacna2d3, Gabrg3, Kcnip2, Kcns3, Gabra1, Grin2a, Kcnk13, Cnga4, Trpc4, Gria3, Kcnh3, Il1rapl1, Grm7, Ryr3, Kcnq5, Kcnd2, Gabra5, Asic2, Gabra2, Pex5l, Kcnh5, Kcnj2, Kcnip4, Kcnh1, Slc24…
GO:0022803	7.7e-10	9.11	1	59	306	passive transmembrane transporter activity	MF	Kcnf1, Scn1a, Hcn1, Trpc6, Slc24a4, Gabra4, Rasa3, Ptk2b, Kcnab1, Cacna1i, Kcng1, Trpv6, Gria1, Trpc5, Cacna1e, Cacna1h, Gjc1, Itgav, Grin3a, Grik3, Scn3b, Chrna3, Gria4, Piezo2, Glra2, Kcnn2, Mcu, Gabrb3, Chrna7, Cacna2d3, Gabrg3, Kcnip2, Kcns3, Gabra1, Grin2a, Kcnk13, Cnga4, Trpc4, Gria3, Kcnh3, Il1rapl1, Grm7, Ryr3, Kcnq5, Kcnd2, Gabra5, Asic2, Gabra2, Pex5l, Kcnh5, Kcnj2, Kcnip4, Kcnh1, Slc24…
GO:0005102	8.22e-10	9.09	1	128	939	receptor binding	MF	Ctgf, F2r, Bmp3, Tgfb2, Ets2, Dlg1, Itgb8, Slit2, Cckbr, Efna5, Fgf10, Tnn, Acvr1c, Cav1, Parp1, Pik3r1, Ptk2b, Fzd8, Nxph3, Rspo2, Fndc5, Atp2b2, Dok4, Fgfr1, Efnb1, Nts, Serpine2, Nxph2, Neto1, Gria1, Ptprd, Eda, Itgav, Bok, Mfge8, Atp2a2, Hsd17b4, Itgb3, Cadm3, Reln, Cdk5r1, Ptprj, Cadm1, Phip, Ptprf, Traf6, Sema3a, Pik3r2, C1qtnf4, Npy, Ptn, Slc27a2, Grb14, Sema5a, Angpt1, Bambi, Ctbp2, Nrip1…
GO:0035556	8.49e-10	9.07	1	211	1706	intracellular signal transduction	BP	Ctgf, F2r, Trib1, Sik1, Stac, Adcy8, Bmp3, Gpr26, Tgfb2, Spsb1, Elmo1, Pde4d, Gcnt2, Dlg1, Hunk, Dusp6, Dlc1, Chml, Pmaip1, Slit2, Rasgrp1, Spry1, Cckbr, Dusp4, Htr2a, Arhgap29, Fgf10, Rasal1, Cav1, Unc5b, Parp1, Dusp7, Rasa3, Pde2a, Pik3r1, Ptk2b, Fzd8, Prex1, Sphkap, Rnf152, Arhgef17, Dok4, Epha8, Rtn4r, BC048403, Sez6l, Fgfr1, Fgfr2, Net1, Peli2, Sgk1, Rtn4rl1, Igfbp4, Serpine2, Ptprd, Dcc, Ed…
GO:0031175	8.91e-10	9.05	1	125	828	neuron projection development	BP	Klhl1, Tgfb2, Chodl, Slit2, Trpc6, Slitrk4, Efna5, Tnn, Rasal1, Matn2, Plxna1, Unc5b, Syt17, Ptk2b, Prex1, Atp2b2, Efhd1, Epha8, Rtn4r, Fgfr1, Fgfr2, Nptx1, Efnb1, Sgk1, Syt4, Rtn4rl1, Ephb3, Serpine2, Foxp1, Ptprd, Pmp22, Trpc5, Dcc, Igsf9, Mkl2, Prickle2, Ntn1, Cux2, Pak1, Csmd3, Reln, Cdk5r1, Eef2k, Grin3a, B2m, Ptprf, Sema3a, Xylt1, Foxo6, Ptn, Cntnap2, Met, Asap1, Twf2, Arid1b, Mgll, Apc, Se…
GO:0007600	9.14e-10	9.04	1	56	285	sensory perception	BP	Pgap1, F2r, Scn1a, Slc4a7, Thrb, Slc24a4, Npy1r, Cckbr, Htr2a, Rorb, Cemip, Tmie, Atp2b2, Fgfr1, Serpine2, Cacna1e, Cacna1h, Gjc1, Sobp, Npy2r, Otof, Ankfn1, Mgll, Sema5a, B3gnt2, Coch, Htr7, Piezo2, Gjd2, Adora1, Whrn, Gabrb3, Chrna7, Kit, Mme, Grin2a, Cnga4, Grm7, Cntn5, Kcnd2, Gucy2e, Ephb1, Gabra5, Htr2c, Myc, Nov, Tshz3, Grm3, Gpx1, Asic2, Pou3f4, Grm8, Gng13, Pcdh15, Syt10, Crym
GO:0005261	9.42e-10	9.03	1	49	219	cation channel activity	MF	Kcnf1, Scn1a, Hcn1, Trpc6, Slc24a4, Rasa3, Ptk2b, Kcnab1, Cacna1i, Kcng1, Trpv6, Gria1, Trpc5, Cacna1e, Cacna1h, Itgav, Grin3a, Grik3, Scn3b, Chrna3, Gria4, Piezo2, Kcnn2, Mcu, Chrna7, Cacna2d3, Kcnip2, Kcns3, Grin2a, Kcnk13, Cnga4, Trpc4, Gria3, Kcnh3, Il1rapl1, Grm7, Ryr3, Kcnq5, Kcnd2, Asic2, Pex5l, Kcnh5, Kcnj2, Kcnip4, Kcnh1, Slc24a2, Kcng3, Kcnk9, Grik2
GO:0050807	1.01e-09	9	1	34	118	regulation of synapse organization	BP	Tpbg, Slitrk4, Efna5, Ephb3, Ptprd, Igsf9, Cux2, Reln, Eef2k, Ptn, Cbln2, Ntrk2, Lrrtm2, Slitrk5, Mef2c, Lrrn3, Chrna7, Mdga1, Nlgn1, Clstn2, Oxtr, Flrt3, Epha7, Lrrtm4, Lrrn1, Il1rapl1, Ephb1, Lingo2, Il1rap, Asic2, Syndig1, C1ql3, Lrrtm3, Flrt2
GO:0045595	1.17e-09	8.93	1	165	1249	regulation of cell differentiation	BP	Ctgf, Brinp3, Trib1, Sik1, Brinp1, Tgfb2, Gcnt2, Dusp6, Thrb, Ptger3, Chodl, Slit2, Rasgrp1, Trpc6, Efna5, Htr2a, Fgf10, Trim16, Tnn, Rorb, Rasal1, Tal1, Cav1, Plxna1, Parp1, Syt17, Pik3r1, Ptk2b, Prex1, Mycn, Fndc5, Rtn4r, Fgfr1, Fgfr2, Net1, Egr3, Sgk1, Syt4, Rtn4rl1, Ephb3, Serpine2, Foxp1, Ptprd, Pmp22, Ctnna1, Trpc5, Dcc, Itgav, Prickle1, Ntn1, S100a10, Rora, Cux2, Pak1, Itgb3, Cdk6, Csmd3, …
GO:0007187	1.18e-09	8.93	1	28	92	G-protein coupled receptor signaling pathway, coupled to cyclic nucleotide second messenger	BP	Adcy8, Gpr26, Chrm4, Ptger3, Sstr2, Chrm3, Sstr1, Npy2r, Prkacb, Itgb3, Chrm1, Grm4, Adcy2, Htr7, S1pr1, Adora1, Sstr4, Grm5, Grm7, Adra1a, Chrm2, Htr4, Grm8, Npr3, Rxfp1, Htr1b, Crhr1, Htr1a
GO:0042330	1.83e-09	8.74	1	60	313	taxis	BP	Tgfb2, Pde4d, Slit2, Efna5, Fgf10, Matn2, Plxna1, Unc5b, Ptk2b, Prex1, Epha8, Swap70, Fgfr1, Egr3, Efnb1, Ephb3, Foxp1, Dcc, Itgav, Ntn1, Itgb3, Reln, Cdk5r1, Ptprj, Hrh1, Sema3a, Met, Sema4c, Prkcd, Sema5a, B3gnt2, Angpt1, Cdh13, Lmtk2, S1pr1, Gas1, Id2, Chn1, Mpp1, Kit, Flrt3, Unc5d, Itga9, Epha7, Cntn4, Alcam, Prkd1, Slit3, Unc5c, Etv1, Vegfa, Ephb1, Nov, Nrg3, Sema6a, Coro1a, Wnt7b, Flrt2, Cx…
GO:0032879	1.93e-09	8.71	1	225	1876	regulation of localization	BP	Mest, F2r, Trib1, Kcnf1, Sik1, Cited2, Stac, Tex15, Gpr26, Lipg, Tgfb2, Scn1a, Pde4d, Gcnt2, Dlg1, Dlc1, Rbpms, Ptger3, Rab3c, Hcn1, Pmaip1, Slit2, Rasgrp1, Trpc6, Slc16a1, Npy1r, Cckbr, Efna5, Htr2a, Fgf10, Trim16, Prkg2, Acvr1c, Acan, Tacr3, Myrip, Cav1, Plxna1, Parp1, Shisa9, Syt17, Pde2a, Pik3r1, Ptk2b, Ptpru, Cemip, Kcnab1, Cacna1i, Prex1, Ccbe1, Kcng1, Atp2b2, Sirpa, Nkd2, Swap70, Fgfr1, Mc…
GO:0030154	2.24e-09	8.65	1	300	2644	cell differentiation	BP	Ctgf, Fosl2, Klhl1, C1galt1, Brinp3, Grk5, Trib1, Sik1, Tiparp, Cited2, Brinp1, Bmp3, Tex15, Pou3f1, Tgfb2, Ets2, Gcnt2, Dusp6, Slc4a7, Thrb, Ptger3, Hcn1, Chodl, Slit2, Rasgrp1, Trpc6, Tll1, Slitrk4, Efna5, Htr2a, Fgf10, Trim16, Tnn, Acvr1c, Acan, Rorb, Cldn1, Rasal1, Tal1, Cav1, Matn2, Plxna1, Unc5b, Parp1, Syt17, Pde2a, Pik3r1, Ptk2b, Ptpru, Fzd8, Prex1, Rspo2, Mycn, Fndc5, Atp2b2, Sirpa, Ndrg…
GO:0000902	2.24e-09	8.65	1	122	799	cell morphogenesis	BP	Tgfb2, Dlg1, Dlc1, Slit2, Trpc6, Slitrk4, Efna5, Tnn, Rasal1, Tal1, Matn2, Plxna1, Unc5b, Syt17, Ptk2b, Prex1, Atp2b2, Epha8, Rtn4r, Fat1, Fgfr2, Net1, Nptx1, Efnb1, Sgk1, Syt4, Ephb3, Foxp1, Ptprd, Trpc5, Dcc, Itgav, Ntn1, S100a10, Tenm1, Cux2, Pak1, Itgb3, Reln, Cdk5r1, Eef2k, Cadm1, Phip, Ptprf, Sema3a, Ptn, Cntnap2, Met, Heg1, Twf2, Mgll, Apc, Sema5a, Strip2, B3gnt2, Wasf1, Bambi, Chrna3, Rap…
GO:0008015	2.39e-09	8.62	1	56	285	blood circulation	BP	Ctgf, F2r, Tgfb2, Scn1a, Pde4d, Dlg1, Thrb, Ptger3, Trhde, Slit2, Npy1r, Htr2a, Chrm3, Tacr3, Cav1, Pde2a, Pik3r1, Nts, Cacna1e, Atp2a2, Ptprj, Hrh1, Sema3a, Chrm1, Npy, Met, Scn3b, Mgll, Smtn, Angpt1, Htr7, Pde3a, Rps6ka2, Adora1, Id2, Kcnn2, Atp1b1, Chrna7, Ahr, Oxtr, Camk2d, Avpr1a, Vegfa, Nr3c1, Htr2c, Adra1a, Pkp2, Gpx1, Asic2, Hey2, Pparg, Chrm2, Kcnj2, Npr3, Htr1b, Htr1a
GO:0042221	2.59e-09	8.59	1	255	2244	response to chemical	BP	Mest, Ctgf, Fosl2, F2r, Brinp3, Trib1, Sik1, Tiparp, Cited2, Brinp1, Bmp3, Tgfb2, Chrm4, Pde4d, Gcnt2, Dusp6, Thrb, Ptger3, Hcn1, Slit2, Trpc6, Calb1, Sstr2, Slc16a1, Gabra4, Spry1, Gpr22, Efna5, Htr2a, Fgf10, Chrm3, Trim16, Hcrtr2, Sstr1, Acvr1c, Rorb, Tacr3, Cldn1, Cav1, Matn2, Plxna1, Unc5b, Parp1, Cad, Pde2a, Pik3r1, Ptk2b, Nr3c2, Plec, Prex1, Ccbe1, Epha8, Rftn1, Rtn4r, Swap70, Fgfr1, Fgfr2,…
GO:0000165	3.3e-09	8.48	1	81	504	MAPK cascade	BP	Ctgf, F2r, Trib1, Bmp3, Tgfb2, Gcnt2, Dlg1, Dusp6, Rasgrp1, Spry1, Cckbr, Dusp4, Htr2a, Fgf10, Cav1, Dusp7, Ptk2b, Fzd8, Dok4, Epha8, Fgfr1, Fgfr2, Peli2, Igfbp4, Dcc, Itgav, Inpp5k, Pak1, Timp3, Itgb3, Pik3r5, Ptprj, Traf6, Pik3r2, Grm4, Met, Sema4c, Prkcd, Hsph1, Apc, Angpt1, Maged1, Rap2a, Inhbb, Ntrk2, Mef2c, Tnfrsf19, Prkce, Tgfa, Adora1, Sstr4, Ksr1, Sash1, Chrna7, Npnt, Plcb1, Kit, Oxtr, B…
GO:0007156	3.7e-09	8.43	1	26	71	homophilic cell adhesion via plasma membrane adhesion molecules	BP	Pcdh20, Igsf9, Cadm3, Cadm1, Ptprf, Cdh13, Ptprt, Pcdhga4, Cdh11, Pcdhb18, Clstn2, Sdk2, Cdh22, Pcdh19, Pcdha7, Cdh9, Pcdha9, Cdh10, Cdh8, Fat3, Cdh20, Pcdh10, Cdh7, Cdh12, Pcdh15, Dsc3
GO:0035249	3.73e-09	8.43	1	26	76	synaptic transmission, glutamatergic	BP	Cckbr, Htr2a, Ptk2b, Serpine2, Npy2r, Pak1, Reln, Glul, Grm4, Grik3, Gria4, Ntrk2, Mef2c, Adora1, Nlgn1, Oxtr, Grm5, Grm7, Tnr, Cdh8, Tshz3, Grm3, Syt1, Grm8, Htr1b, Grik2
GO:0006935	3.78e-09	8.42	1	59	311	chemotaxis	BP	Tgfb2, Pde4d, Slit2, Efna5, Fgf10, Matn2, Plxna1, Unc5b, Ptk2b, Prex1, Epha8, Swap70, Fgfr1, Egr3, Efnb1, Ephb3, Foxp1, Dcc, Itgav, Ntn1, Itgb3, Reln, Cdk5r1, Ptprj, Hrh1, Sema3a, Met, Sema4c, Prkcd, Sema5a, B3gnt2, Angpt1, Cdh13, Lmtk2, S1pr1, Gas1, Chn1, Mpp1, Kit, Flrt3, Unc5d, Itga9, Epha7, Cntn4, Alcam, Prkd1, Slit3, Unc5c, Etv1, Vegfa, Ephb1, Nov, Nrg3, Sema6a, Coro1a, Wnt7b, Flrt2, Cxcl14,…
GO:0048869	3.98e-09	8.4	1	311	2783	cellular developmental process	BP	Ctgf, Fosl2, Klhl1, C1galt1, Brinp3, Grk5, Trib1, Sik1, Tiparp, Cited2, Brinp1, Bmp3, Tex15, Pou3f1, Tgfb2, Ets2, Gcnt2, Dlg1, Dusp6, Dlc1, Slc4a7, Thrb, Ptger3, Hcn1, Chodl, Slit2, Rasgrp1, Trpc6, Tll1, Slitrk4, Efna5, Htr2a, Fgf10, Trim16, Tnn, Acvr1c, Acan, Rorb, Cldn1, Rasal1, Tal1, Cav1, Matn2, Plxna1, Unc5b, Parp1, Syt17, Pde2a, Pik3r1, Ptk2b, Ptpru, Fzd8, Prex1, Rspo2, Mycn, Fndc5, Atp2b2,…
GO:0070887	4.28e-09	8.37	1	200	1665	cellular response to chemical stimulus	BP	Ctgf, Brinp3, Trib1, Sik1, Tiparp, Cited2, Brinp1, Bmp3, Tgfb2, Chrm4, Pde4d, Gcnt2, Dusp6, Thrb, Ptger3, Hcn1, Slit2, Trpc6, Calb1, Sstr2, Slc16a1, Spry1, Gpr22, Efna5, Fgf10, Chrm3, Hcrtr2, Sstr1, Acvr1c, Rorb, Cav1, Parp1, Pde2a, Pik3r1, Ptk2b, Nr3c2, Prex1, Ccbe1, Epha8, Rtn4r, Swap70, Fgfr1, Fgfr2, Net1, Nptx1, Egr3, Shisa2, Sgk1, Rtn4rl1, Foxp1, Sulf2, Ctnna1, Cacna1e, Inpp5k, Bok, S100a10,…
GO:0007188	4.49e-09	8.35	1	26	84	adenylate cyclase-modulating G-protein coupled receptor signaling pathway	BP	Adcy8, Gpr26, Chrm4, Ptger3, Sstr2, Chrm3, Npy2r, Prkacb, Itgb3, Chrm1, Grm4, Adcy2, Htr7, S1pr1, Adora1, Grm5, Grm7, Adra1a, Chrm2, Htr4, Grm8, Npr3, Rxfp1, Htr1b, Crhr1, Htr1a
GO:0051480	7.7e-09	8.11	1	42	193	regulation of cytosolic calcium ion concentration	BP	F2r, Tgfb2, Pde4d, Ptger3, Trpc6, Calb1, Npy1r, Cckbr, Htr2a, Hcrtr2, Cav1, Ptk2b, Cemip, Cacna1i, Trhr, Atp2b2, Swap70, Gpr6, Trpv6, Trpc5, Itgav, Bok, Npy2r, Itgb3, S1pr1, Prkce, Cib2, Oxtr, Mchr1, Camk2d, Grin2a, Avpr1a, Trpc4, Atp2b1, Prkd1, Ryr3, Calb2, Htr2c, Adra1a, Ramp3, Coro1a, Crhr1
GO:1903522	8.73e-09	8.06	1	36	146	regulation of blood circulation	BP	Ctgf, F2r, Tgfb2, Pde4d, Dlg1, Thrb, Ptger3, Npy1r, Htr2a, Chrm3, Tacr3, Cav1, Pik3r1, Cacna1e, Gjc1, Atp2a2, Hrh1, Sema3a, Chrm1, Scn3b, Smtn, Adora1, Kcnn2, Atp1b1, Chrna7, Ahr, Oxtr, Avpr1a, Htr2c, Adra1a, Pkp2, Asic2, Hey2, Chrm2, Kcnj2, Fgf13
GO:0051962	9.55e-09	8.02	1	78	462	positive regulation of nervous system development	BP	Brinp3, Brinp1, Tpbg, Trpc6, Slitrk4, Efna5, Rasal1, Syt17, Ptk2b, Fgfr1, Sgk1, Syt4, Ephb3, Serpine2, Ptprd, Trpc5, Dcc, Ntn1, Cux2, Pak1, Reln, Eef2k, Ptprf, Sema3a, Foxo6, Ptn, Met, Twf2, Sema5a, Negr1, Cbln2, Htr7, Ascl1, Ntrk2, Lrrtm2, Slitrk5, Enc1, Gprc5b, Mef2c, Lrrn3, Id2, Brinp2, Vldlr, Nlgn1, Clstn2, Kit, Oxtr, Man2a1, Flrt3, Vim, Rims2, Lrrtm4, Rgma, Grm5, Lrrn1, Bcl6, Prkd1, Il1rapl1…
GO:0007193	1.06e-08	7.97	1	17	40	adenylate cyclase-inhibiting G-protein coupled receptor signaling pathway	BP	Chrm4, Sstr2, Chrm3, Npy2r, Itgb3, Chrm1, Grm4, Htr7, S1pr1, Adora1, Grm5, Grm7, Chrm2, Grm8, Npr3, Htr1b, Htr1a
GO:0000904	1.2e-08	7.92	1	95	585	cell morphogenesis involved in differentiation	BP	Tgfb2, Slit2, Trpc6, Slitrk4, Efna5, Tnn, Tal1, Matn2, Plxna1, Unc5b, Prex1, Atp2b2, Epha8, Rtn4r, Fat1, Fgfr2, Net1, Nptx1, Efnb1, Sgk1, Ephb3, Foxp1, Ptprd, Trpc5, Dcc, Itgav, Ntn1, S100a10, Cux2, Pak1, Itgb3, Reln, Cdk5r1, Eef2k, Ptprf, Sema3a, Met, Heg1, Twf2, Mgll, Apc, Sema5a, B3gnt2, Chrna3, Rap2a, Adcy1, Ntrk2, Slitrk5, Lmtk2, Mef2c, Gas1, Whrn, Id2, Chn1, Cdh11, Chrna7, Vldlr, Nlgn1, Flr…
GO:0040011	1.27e-08	7.9	1	147	1087	locomotion	BP	Ctgf, F2r, Trib1, Cited2, Tgfb2, Elmo1, Chrm4, Pde4d, Gcnt2, Dlc1, Ptger3, Slit2, Efna5, Fgf10, Tnn, Acvr1c, Acan, Tacr3, Matn2, Plxna1, Unc5b, Pik3r1, Ptk2b, Ptpru, Cemip, Prex1, Ccbe1, Atp2b2, Sirpa, Epha8, Swap70, Fgfr1, Net1, Egr3, Efnb1, Mcc, Ephb3, Foxp1, Ctnna1, Cacna1e, Dcc, Itgav, Mkl2, Ntn1, Gpc6, Pak1, Gsn, Itgb3, Reln, Cdk5r1, Ptprj, Ptprf, Hrh1, Sema3a, Chrm1, Kctd13, Ptn, Met, Schip…
GO:0023014	1.27e-08	7.89	1	81	518	signal transduction by protein phosphorylation	BP	Ctgf, F2r, Trib1, Bmp3, Tgfb2, Gcnt2, Dlg1, Dusp6, Rasgrp1, Spry1, Cckbr, Dusp4, Htr2a, Fgf10, Cav1, Dusp7, Ptk2b, Fzd8, Dok4, Epha8, Fgfr1, Fgfr2, Peli2, Igfbp4, Dcc, Itgav, Inpp5k, Pak1, Timp3, Itgb3, Pik3r5, Ptprj, Traf6, Pik3r2, Grm4, Met, Sema4c, Prkcd, Hsph1, Apc, Angpt1, Maged1, Rap2a, Inhbb, Ntrk2, Mef2c, Tnfrsf19, Prkce, Tgfa, Adora1, Sstr4, Ksr1, Sash1, Chrna7, Npnt, Plcb1, Kit, Oxtr, B…
GO:0005230	1.6e-08	7.8	1	19	51	extracellular ligand-gated ion channel activity	MF	Gabra4, Ptk2b, Gria1, Grin3a, Grik3, Chrna3, Gria4, Glra2, Gabrb3, Chrna7, Gabrg3, Gabra1, Grin2a, Gria3, Gabra5, Gabra2, Glra3, Gabrg1, Grik2
GO:0043408	1.76e-08	7.75	1	74	460	regulation of MAPK cascade	BP	Ctgf, F2r, Trib1, Bmp3, Tgfb2, Gcnt2, Dlg1, Dusp6, Rasgrp1, Spry1, Dusp4, Htr2a, Fgf10, Cav1, Dusp7, Ptk2b, Fzd8, Epha8, Fgfr1, Fgfr2, Peli2, Igfbp4, Dcc, Itgav, Inpp5k, Pak1, Timp3, Itgb3, Pik3r5, Ptprj, Traf6, Pik3r2, Grm4, Met, Sema4c, Prkcd, Hsph1, Apc, Angpt1, Maged1, Rap2a, Inhbb, Ntrk2, Tnfrsf19, Prkce, Tgfa, Adora1, Sstr4, Ksr1, Sash1, Chrna7, Npnt, Plcb1, Kit, Bmper, Camk2d, Sfrp1, Epha7…
GO:0055074	2.27e-08	7.64	1	51	270	calcium ion homeostasis	BP	F2r, Tmtc2, Tgfb2, Pde4d, Ptger3, Trpc6, Calb1, Slc24a4, Npy1r, Cckbr, Htr2a, Hcrtr2, Cav1, Ptk2b, Cemip, Cacna1i, Trhr, Atp2b2, Swap70, Gpr6, Trpv6, Trpc5, Itgav, Bok, Atp2a2, Npy2r, Itgb3, Micu1, S1pr1, Prkce, Atp1b1, Mcu, Cib2, Chrna7, Oxtr, Mchr1, Camk2d, Grin2a, Avpr1a, Trpc4, Atp2b1, Prkd1, Ryr3, Calb2, Htr2c, Adra1a, Ramp3, Coro1a, Slc24a2, Crhr1, Grik2
GO:0010647	2.43e-08	7.61	1	138	1059	positive regulation of cell communication	BP	Ctgf, F2r, Cited2, Bmp3, Tgfb2, Gcnt2, Rbpms, Pmaip1, Rasgrp1, Calb1, Cckbr, Htr2a, Fgf10, Trim16, Klf14, Myrip, Cav1, Unc5b, Parp1, Pik3r1, Ptk2b, Fzd8, Rspo2, Ccbe1, Aldh1a3, Epha8, Rtn4r, Fgfr1, Fgfr2, Peli2, Igfbp4, Serpine2, Neto1, Sulf2, Gria1, Ctnna1, Scube1, Dcc, Eda, Itgav, Bok, Cux2, Pak1, Timp3, Gsn, Itgb3, Pik3r5, Akt3, Reln, Ptprj, Hip1, Phip, Nell2, Traf6, Glul, Grm4, Met, Sema4c, P…
GO:0006874	2.64e-08	7.58	1	50	264	cellular calcium ion homeostasis	BP	F2r, Tgfb2, Pde4d, Ptger3, Trpc6, Calb1, Slc24a4, Npy1r, Cckbr, Htr2a, Hcrtr2, Cav1, Ptk2b, Cemip, Cacna1i, Trhr, Atp2b2, Swap70, Gpr6, Trpv6, Trpc5, Itgav, Bok, Atp2a2, Npy2r, Itgb3, Micu1, S1pr1, Prkce, Atp1b1, Mcu, Cib2, Chrna7, Oxtr, Mchr1, Camk2d, Grin2a, Avpr1a, Trpc4, Atp2b1, Prkd1, Ryr3, Calb2, Htr2c, Adra1a, Ramp3, Coro1a, Slc24a2, Crhr1, Grik2
GO:0015276	2.67e-08	7.57	1	26	88	ligand-gated ion channel activity	MF	Hcn1, Gabra4, Rasa3, Ptk2b, Gria1, Grin3a, Grik3, Chrna3, Gria4, Glra2, Gabrb3, Chrna7, Gabrg3, Gabra1, Grin2a, Cnga4, Gria3, Ryr3, Gabra5, Asic2, Gabra2, Pex5l, Kcnj2, Glra3, Gabrg1, Grik2
GO:0022834	2.67e-08	7.57	1	26	88	ligand-gated channel activity	MF	Hcn1, Gabra4, Rasa3, Ptk2b, Gria1, Grin3a, Grik3, Chrna3, Gria4, Glra2, Gabrb3, Chrna7, Gabrg3, Gabra1, Grin2a, Cnga4, Gria3, Ryr3, Gabra5, Asic2, Gabra2, Pex5l, Kcnj2, Glra3, Gabrg1, Grik2
GO:0072503	2.81e-08	7.55	1	52	281	cellular divalent inorganic cation homeostasis	BP	F2r, Tgfb2, Pde4d, Ptger3, Trpc6, Calb1, Slc24a4, Npy1r, Cckbr, Htr2a, Hcrtr2, Cav1, Ptk2b, Cemip, Cacna1i, Trhr, Atp2b2, Swap70, Gpr6, Trpv6, Trpc5, Itgav, Bok, Atp2a2, Slc30a3, Npy2r, Itgb3, Micu1, S1pr1, Prkce, Atp1b1, Mcu, Cib2, Chrna7, Mt1, Oxtr, Mchr1, Camk2d, Grin2a, Avpr1a, Trpc4, Atp2b1, Prkd1, Ryr3, Calb2, Htr2c, Adra1a, Ramp3, Coro1a, Slc24a2, Crhr1, Grik2
GO:0022824	3.03e-08	7.52	1	15	31	transmitter-gated ion channel activity	MF	Ptk2b, Gria1, Grin3a, Grik3, Chrna3, Gria4, Glra2, Gabrb3, Chrna7, Gabra1, Grin2a, Gria3, Gabra2, Glra3, Grik2
GO:0022835	3.03e-08	7.52	1	15	31	transmitter-gated channel activity	MF	Ptk2b, Gria1, Grin3a, Grik3, Chrna3, Gria4, Glra2, Gabrb3, Chrna7, Gabra1, Grin2a, Gria3, Gabra2, Glra3, Grik2
GO:0032989	3.11e-08	7.51	1	124	862	cellular component morphogenesis	BP	Tgfb2, Dlg1, Dlc1, Slit2, Trpc6, Slitrk4, Efna5, Tnn, Rasal1, Tal1, Matn2, Plxna1, Unc5b, Syt17, Ptk2b, Prex1, Atp2b2, Epha8, Rtn4r, Fat1, Fgfr2, Net1, Nptx1, Efnb1, Sgk1, Syt4, Ephb3, Foxp1, Ptprd, Pmp22, Trpc5, Dcc, Itgav, Ntn1, S100a10, Tenm1, Cux2, Pak1, Itgb3, Reln, Cdk5r1, Eef2k, Cadm1, Phip, Ptprf, Sema3a, Ptn, Cntnap2, Met, Heg1, Twf2, Mgll, Apc, Sema5a, Strip2, B3gnt2, Wasf1, Bambi, Chrn…
GO:0023056	3.48e-08	7.46	1	138	1065	positive regulation of signaling	BP	Ctgf, F2r, Cited2, Bmp3, Tgfb2, Gcnt2, Rbpms, Pmaip1, Rasgrp1, Calb1, Cckbr, Htr2a, Fgf10, Trim16, Klf14, Myrip, Cav1, Unc5b, Parp1, Pik3r1, Ptk2b, Fzd8, Rspo2, Ccbe1, Aldh1a3, Epha8, Rtn4r, Fgfr1, Fgfr2, Peli2, Igfbp4, Serpine2, Neto1, Sulf2, Gria1, Ctnna1, Scube1, Dcc, Eda, Itgav, Bok, Cux2, Pak1, Timp3, Gsn, Itgb3, Pik3r5, Akt3, Reln, Ptprj, Hip1, Phip, Nell2, Traf6, Glul, Grm4, Met, Sema4c, P…
GO:0006812	3.9e-08	7.41	1	99	708	cation transport	BP	Ctgf, F2r, Slc5a3, Kcnf1, Sik1, Stac, Tgfb2, Scn1a, Pde4d, Dlg1, Slc4a7, Ptger3, Hcn1, Trpc6, Slc24a4, Cckbr, Htr2a, Cav1, Shisa9, Ptk2b, Cemip, Kcnab1, Cacna1i, Kcng1, Atp2b2, Sgk1, Syt4, Trpv6, Serpine2, Neto1, Trpc5, Cacna1e, Cacna1h, Itgav, Inpp5k, Atp2a2, Slc30a3, Slc4a4, Npy2r, Itgb3, Slc22a3, Akt3, Reln, Grin3a, B2m, Hrh1, Scn3b, Chrna3, Htr7, Piezo2, Lmtk2, Micu1, Mef2c, Prkce, Adora1, Se…
GO:0060284	4.39e-08	7.36	1	109	754	regulation of cell development	BP	Brinp3, Trib1, Brinp1, Ptger3, Chodl, Slit2, Trpc6, Efna5, Rasal1, Cav1, Plxna1, Syt17, Ptk2b, Prex1, Mycn, Rtn4r, Fgfr1, Net1, Sgk1, Syt4, Rtn4rl1, Ephb3, Serpine2, Foxp1, Ptprd, Pmp22, Ctnna1, Trpc5, Dcc, Ntn1, S100a10, Cux2, Pak1, Itgb3, Csmd3, Reln, Cdk5r1, Eef2k, B2m, Ptprf, Sema3a, Xylt1, Foxo6, Ptn, Met, Asap1, Twf2, Mgll, Grb14, Sema5a, Negr1, Chrna3, Rap2a, Htr7, Arntl, Ascl1, Ntrk2, Pde…
GO:0009605	5.01e-08	7.3	1	140	1101	response to external stimulus	BP	F2r, Trib1, Sik1, Tgfb2, Scn1a, Pde4d, Ptger3, Slit2, Slc16a1, Efna5, Htr2a, Fam46a, Fgf10, Acvr1c, Cav1, Matn2, Plxna1, Unc5b, Cad, Kif26a, Pde2a, Ptk2b, Plec, Prex1, Aldh1a3, Rnf152, Atp2b2, Hrk, Epha8, Rtn4r, BC048403, Swap70, Fgfr1, Egr3, Efnb1, Rtn4rl1, Ephb3, Serpine2, Foxp1, Dcc, Itgav, Ntn1, Rora, Xpr1, Itgb3, Slc22a3, Cdk19, Reln, Cdk5r1, Ptprj, Grin3a, B2m, Ptprf, Hrh1, Traf6, Pcsk1n, S…
GO:0048667	5.53e-08	7.26	1	80	479	cell morphogenesis involved in neuron differentiation	BP	Tgfb2, Slit2, Trpc6, Slitrk4, Efna5, Tnn, Matn2, Plxna1, Unc5b, Atp2b2, Epha8, Rtn4r, Fgfr2, Nptx1, Efnb1, Sgk1, Ephb3, Foxp1, Ptprd, Trpc5, Dcc, Ntn1, Cux2, Pak1, Reln, Cdk5r1, Eef2k, Ptprf, Sema3a, Met, Twf2, Mgll, Apc, Sema5a, B3gnt2, Chrna3, Rap2a, Adcy1, Ntrk2, Slitrk5, Lmtk2, Mef2c, Gas1, Whrn, Id2, Chn1, Cdh11, Chrna7, Vldlr, Nlgn1, Flrt3, Unc5d, Fmn1, Vim, Epha7, Rgma, Ntng2, Cntn4, Ngef,…
GO:0050954	5.63e-08	7.25	1	28	105	sensory perception of mechanical stimulus	BP	Pgap1, Scn1a, Thrb, Htr2a, Cemip, Tmie, Atp2b2, Fgfr1, Serpine2, Sobp, Otof, Coch, Htr7, Piezo2, Whrn, Gabrb3, Kit, Grm7, Cntn5, Gabra5, Myc, Tshz3, Gpx1, Asic2, Pou3f4, Grm8, Pcdh15, Crym
GO:0050767	6.14e-08	7.21	1	100	674	regulation of neurogenesis	BP	Brinp3, Brinp1, Ptger3, Chodl, Slit2, Trpc6, Efna5, Rasal1, Cav1, Plxna1, Syt17, Ptk2b, Prex1, Mycn, Rtn4r, Fgfr1, Sgk1, Syt4, Rtn4rl1, Ephb3, Serpine2, Ptprd, Pmp22, Ctnna1, Trpc5, Dcc, Ntn1, Cux2, Pak1, Csmd3, Reln, Cdk5r1, Eef2k, B2m, Ptprf, Sema3a, Xylt1, Foxo6, Ptn, Met, Asap1, Twf2, Mgll, Sema5a, Negr1, Chrna3, Rap2a, Htr7, Arntl, Ascl1, Ntrk2, Enc1, Gprc5b, Mef2c, Id2, Chn1, Brinp2, Vldlr,…
GO:0072507	6.59e-08	7.18	1	53	294	divalent inorganic cation homeostasis	BP	F2r, Tmtc2, Tgfb2, Pde4d, Ptger3, Trpc6, Calb1, Slc24a4, Npy1r, Cckbr, Htr2a, Hcrtr2, Cav1, Ptk2b, Cemip, Cacna1i, Trhr, Atp2b2, Swap70, Gpr6, Trpv6, Trpc5, Itgav, Bok, Atp2a2, Slc30a3, Npy2r, Itgb3, Micu1, S1pr1, Prkce, Atp1b1, Mcu, Cib2, Chrna7, Mt1, Oxtr, Mchr1, Camk2d, Grin2a, Avpr1a, Trpc4, Atp2b1, Prkd1, Ryr3, Calb2, Htr2c, Adra1a, Ramp3, Coro1a, Slc24a2, Crhr1, Grik2
GO:0007167	7.67e-08	7.12	1	91	604	enzyme linked receptor protein signaling pathway	BP	Ctgf, Tiparp, Cited2, Bmp3, Tgfb2, Gcnt2, Dusp6, Rbpms, Spry1, Efna5, Fgf10, Acvr1c, Cav1, Parp1, Pik3r1, Ptk2b, Ccbe1, Dok4, Epha8, Fgfr1, Fgfr2, Shisa2, Efnb1, Ephb3, Igfbp4, Sulf2, Inpp5k, Pak1, Itgb3, Cdk5r1, Ptprj, Hip1, Phip, Ptprf, Pik3r2, Nlk, Met, Schip1, Prkcd, Grb14, Apc, Rgmb, Angpt1, Wasf1, Bambi, Chrna3, Cdh13, Acvr2a, Zfp423, Sub1, Inhbb, Ntrk2, Ptprt, Lmtk2, Cblb, Tgfa, Adora1, Ch…
GO:0034220	7.99e-08	7.1	1	80	537	ion transmembrane transport	BP	F2r, Kcnf1, Stac, Tgfb2, Scn1a, Pde4d, Dlg1, Ptger3, Hcn1, Trpc6, Slc16a1, Htr2a, Cav1, Shisa9, Ptk2b, Cemip, Kcnab1, Kcng1, Atp2b2, Trpv6, Neto1, Gria1, Trpc5, Cacna1e, Cacna1h, Itgav, Atp2a2, Xpr1, Itgb3, Reln, B2m, Hrh1, Scn3b, Micu1, Glra2, Mef2c, Prkce, Acsl5, Kcnn2, Atp1b1, Mcu, Gabrb3, Chrna7, Cacna2d3, Dpp10, Plcb1, Nlgn1, Kcnip2, Ahcyl1, Neto2, Rasgrf1, Kcns3, Gabra1, Camk2d, Grin2a, Kcn…
GO:0016477	8.19e-08	7.09	1	120	853	cell migration	BP	Ctgf, F2r, Trib1, Cited2, Tgfb2, Elmo1, Pde4d, Gcnt2, Dlc1, Ptger3, Slit2, Fgf10, Tnn, Acvr1c, Acan, Matn2, Plxna1, Pik3r1, Ptk2b, Ptpru, Cemip, Prex1, Ccbe1, Sirpa, Epha8, Swap70, Fgfr1, Net1, Egr3, Efnb1, Mcc, Ephb3, Dcc, Itgav, Mkl2, Ntn1, Gpc6, Pak1, Gsn, Itgb3, Reln, Cdk5r1, Ptprj, Ptprf, Hrh1, Sema3a, Kctd13, Ptn, Met, Schip1, Tmem18, Sema4c, Ovol2, Prkcd, Apc, Sema5a, Strip2, Angpt1, Bambi…
GO:1903524	9.34e-08	7.03	1	17	48	positive regulation of blood circulation	BP	Ctgf, F2r, Tgfb2, Ptger3, Npy1r, Htr2a, Tacr3, Cav1, Hrh1, Scn3b, Smtn, Chrna7, Oxtr, Avpr1a, Htr2c, Adra1a, Hey2
GO:0045597	1.12e-07	6.95	1	102	724	positive regulation of cell differentiation	BP	Ctgf, Brinp3, Trib1, Brinp1, Tgfb2, Gcnt2, Thrb, Rasgrp1, Trpc6, Efna5, Htr2a, Trim16, Rasal1, Tal1, Parp1, Syt17, Pik3r1, Ptk2b, Prex1, Fndc5, Fgfr1, Net1, Egr3, Sgk1, Syt4, Serpine2, Foxp1, Ptprd, Trpc5, Dcc, Ntn1, S100a10, Cux2, Pak1, Itgb3, Reln, Eef2k, Ptprf, Traf6, Sema3a, Foxo6, Ptn, Met, Il4ra, Twf2, Ovol2, Apc, Sema5a, Negr1, Bambi, Acvr2a, Htr7, Arntl, Ascl1, Ntrk2, Pde3a, Enc1, Gprc5b,…
GO:0098660	1.18e-07	6.93	1	66	419	inorganic ion transmembrane transport	BP	F2r, Kcnf1, Stac, Tgfb2, Pde4d, Dlg1, Ptger3, Hcn1, Trpc6, Htr2a, Cav1, Ptk2b, Cemip, Kcnab1, Kcng1, Atp2b2, Trpv6, Neto1, Trpc5, Cacna1e, Cacna1h, Itgav, Atp2a2, Xpr1, Itgb3, B2m, Hrh1, Scn3b, Micu1, Glra2, Prkce, Kcnn2, Atp1b1, Mcu, Gabrb3, Cacna2d3, Dpp10, Plcb1, Kcnip2, Neto2, Kcns3, Gabra1, Camk2d, Grin2a, Kcnk13, Trpc4, Grm5, Atp2b1, Kcnh3, Prkd1, Ryr3, Kcnq5, Kcnd2, Htr2c, Ramp3, Gabra2, C…
GO:0045664	1.18e-07	6.93	1	87	569	regulation of neuron differentiation	BP	Brinp3, Brinp1, Ptger3, Chodl, Slit2, Trpc6, Efna5, Rasal1, Cav1, Plxna1, Syt17, Ptk2b, Prex1, Mycn, Rtn4r, Fgfr1, Sgk1, Syt4, Rtn4rl1, Ephb3, Serpine2, Ptprd, Pmp22, Trpc5, Dcc, Ntn1, Cux2, Pak1, Csmd3, Reln, Cdk5r1, Eef2k, B2m, Ptprf, Sema3a, Xylt1, Foxo6, Ptn, Met, Asap1, Twf2, Mgll, Sema5a, Negr1, Chrna3, Rap2a, Htr7, Ascl1, Ntrk2, Enc1, Gprc5b, Mef2c, Id2, Chn1, Brinp2, Vldlr, Nlgn1, Ntm, Vi…
GO:0006875	1.21e-07	6.92	1	56	334	cellular metal ion homeostasis	BP	F2r, Tgfb2, Pde4d, Ptger3, Trpc6, Calb1, Slc24a4, Npy1r, Cckbr, Htr2a, Hcrtr2, Cav1, Ptk2b, Nr3c2, Cemip, Cacna1i, Trhr, Atp2b2, Swap70, Sgk1, Gpr6, Trpv6, Trpc5, Itgav, Bok, Atp2a2, Slc30a3, Npy2r, Itgb3, Letmd1, Micu1, S1pr1, Prkce, Atp1b1, Mcu, Cib2, Chrna7, Mt1, Oxtr, Mchr1, Camk2d, Grin2a, Avpr1a, Trpc4, Atp2b1, Prkd1, Ryr3, Calb2, Htr2c, Myc, Adra1a, Ramp3, Coro1a, Slc24a2, Crhr1, Grik2
GO:0043410	1.23e-07	6.91	1	53	299	positive regulation of MAPK cascade	BP	Ctgf, F2r, Tgfb2, Gcnt2, Rasgrp1, Htr2a, Fgf10, Ptk2b, Fzd8, Epha8, Fgfr1, Fgfr2, Peli2, Igfbp4, Dcc, Itgav, Pak1, Itgb3, Pik3r5, Traf6, Grm4, Met, Sema4c, Prkcd, Angpt1, Maged1, Ntrk2, Tnfrsf19, Prkce, Tgfa, Adora1, Sstr4, Ksr1, Sash1, Chrna7, Npnt, Plcb1, Kit, Bmper, Camk2d, Magi3, Grm5, Plce1, Tnfrsf11a, Vegfa, Htr2c, Adra1a, Ramp3, Pdgfc, Fbxw7, Wnt7b, Bmp2, Ntf3
GO:0095500	1.27e-07	6.9	1	10	18	acetylcholine receptor signaling pathway	BP	Chrm4, Chrm3, Cdk5r1, Chrm1, Chrna3, Rgs8, Chrna7, Plcb1, Chrm2, Lypd1
GO:1903831	1.27e-07	6.9	1	10	18	signal transduction involved in cellular response to ammonium ion	BP	Chrm4, Chrm3, Cdk5r1, Chrm1, Chrna3, Rgs8, Chrna7, Plcb1, Chrm2, Lypd1
GO:1905144	1.27e-07	6.9	1	10	18	response to acetylcholine	BP	Chrm4, Chrm3, Cdk5r1, Chrm1, Chrna3, Rgs8, Chrna7, Plcb1, Chrm2, Lypd1
GO:1905145	1.27e-07	6.9	1	10	18	cellular response to acetylcholine	BP	Chrm4, Chrm3, Cdk5r1, Chrm1, Chrna3, Rgs8, Chrna7, Plcb1, Chrm2, Lypd1
GO:0008066	1.32e-07	6.88	1	13	24	glutamate receptor activity	MF	Ptk2b, Gria1, Grin3a, Grm4, Grik3, Gria4, Grin2a, Grm5, Gria3, Grm7, Grm3, Grm8, Grik2
GO:0048870	1.38e-07	6.86	1	126	927	cell motility	BP	Ctgf, F2r, Trib1, Cited2, Tgfb2, Elmo1, Pde4d, Gcnt2, Dlc1, Ptger3, Slit2, Fgf10, Tnn, Acvr1c, Acan, Tacr3, Matn2, Plxna1, Pik3r1, Ptk2b, Ptpru, Cemip, Prex1, Ccbe1, Sirpa, Epha8, Swap70, Fgfr1, Net1, Egr3, Efnb1, Mcc, Ephb3, Ctnna1, Cacna1e, Dcc, Itgav, Mkl2, Ntn1, Gpc6, Pak1, Gsn, Itgb3, Reln, Cdk5r1, Ptprj, Ptprf, Hrh1, Sema3a, Kctd13, Ptn, Met, Schip1, Tmem18, Sema4c, Ovol2, Prkcd, Apc, Sema5…
GO:0051674	1.38e-07	6.86	1	126	927	localization of cell	BP	Ctgf, F2r, Trib1, Cited2, Tgfb2, Elmo1, Pde4d, Gcnt2, Dlc1, Ptger3, Slit2, Fgf10, Tnn, Acvr1c, Acan, Tacr3, Matn2, Plxna1, Pik3r1, Ptk2b, Ptpru, Cemip, Prex1, Ccbe1, Sirpa, Epha8, Swap70, Fgfr1, Net1, Egr3, Efnb1, Mcc, Ephb3, Ctnna1, Cacna1e, Dcc, Itgav, Mkl2, Ntn1, Gpc6, Pak1, Gsn, Itgb3, Reln, Cdk5r1, Ptprj, Ptprf, Hrh1, Sema3a, Kctd13, Ptn, Met, Schip1, Tmem18, Sema4c, Ovol2, Prkcd, Apc, Sema5…
GO:0034765	1.63e-07	6.79	1	53	301	regulation of ion transmembrane transport	BP	F2r, Kcnf1, Stac, Tgfb2, Scn1a, Pde4d, Dlg1, Ptger3, Hcn1, Trpc6, Cav1, Shisa9, Ptk2b, Cemip, Kcnab1, Kcng1, Neto1, Cacna1e, Cacna1h, Itgb3, Reln, B2m, Scn3b, Mef2c, Prkce, Acsl5, Atp1b1, Cacna2d3, Dpp10, Plcb1, Nlgn1, Kcnip2, Ahcyl1, Neto2, Rasgrf1, Kcns3, Camk2d, Kcnk13, Grm5, Kcnh3, Prkd1, Kcnq5, Kcnd2, Rasgrf2, Ramp3, Asic2, Coro1a, Kcnh5, Kcnj2, Kcnip4, Kcnh1, Kcng3, Crhr1
GO:0009966	1.68e-07	6.78	1	209	1826	regulation of signal transduction	BP	Ctgf, F2r, Grk5, Trib1, Cited2, Bmp3, Tgfb2, Pde4d, Gcnt2, Dlg1, Dusp6, Dlc1, Rbpms, Ptger3, Pmaip1, Slit2, Rasgrp1, Spry1, Dusp4, Htr2a, Rgs4, Fgf10, Trim16, Tnn, Klf14, Rasal1, Cav1, Cxxc4, Unc5b, Parp1, Dusp7, Shisa9, Kif26a, Rasa3, Pik3r1, Ptk2b, Fzd8, Prex1, Sphkap, Rspo2, Ccbe1, Aldh1a3, Rnf152, Arhgef17, Nkd2, Epha8, Rtn4r, BC048403, Sez6l, Fgfr1, Fgfr2, Net1, Shisa2, Peli2, Mcc, Rtn4rl1, …
GO:0030001	1.8e-07	6.75	1	82	551	metal ion transport	BP	Ctgf, F2r, Slc5a3, Kcnf1, Sik1, Stac, Tgfb2, Scn1a, Pde4d, Dlg1, Slc4a7, Ptger3, Hcn1, Trpc6, Slc24a4, Htr2a, Cav1, Ptk2b, Cemip, Kcnab1, Cacna1i, Kcng1, Atp2b2, Sgk1, Trpv6, Serpine2, Neto1, Trpc5, Cacna1e, Cacna1h, Itgav, Inpp5k, Atp2a2, Slc30a3, Slc4a4, Itgb3, Akt3, Grin3a, B2m, Hrh1, Scn3b, Lmtk2, Micu1, Prkce, Adora1, Kcnn2, Atp1b1, Mcu, Chrna7, Cacna2d3, Dpp10, Plcb1, Slc20a1, Kcnip2, Ahcyl…
GO:0051049	1.84e-07	6.74	1	162	1342	regulation of transport	BP	F2r, Kcnf1, Sik1, Stac, Gpr26, Lipg, Tgfb2, Scn1a, Pde4d, Dlg1, Rbpms, Ptger3, Rab3c, Hcn1, Pmaip1, Rasgrp1, Trpc6, Slc16a1, Npy1r, Cckbr, Efna5, Htr2a, Fgf10, Trim16, Prkg2, Acvr1c, Myrip, Cav1, Parp1, Shisa9, Syt17, Pde2a, Pik3r1, Ptk2b, Cemip, Kcnab1, Cacna1i, Kcng1, Atp2b2, Sirpa, Fgfr1, Sgk1, Syt4, Serpine2, Neto1, Sulf2, Cacna1e, Cacna1h, Eda, Itgav, Inpp5k, Bok, Mfge8, Atp2a2, Slc30a3, Npy…
GO:0098655	1.97e-07	6.71	1	66	426	cation transmembrane transport	BP	F2r, Kcnf1, Stac, Tgfb2, Pde4d, Dlg1, Ptger3, Hcn1, Trpc6, Htr2a, Cav1, Shisa9, Ptk2b, Cemip, Kcnab1, Kcng1, Atp2b2, Trpv6, Neto1, Trpc5, Cacna1e, Cacna1h, Itgav, Atp2a2, Itgb3, Reln, B2m, Hrh1, Scn3b, Micu1, Mef2c, Prkce, Kcnn2, Atp1b1, Mcu, Cacna2d3, Dpp10, Plcb1, Nlgn1, Kcnip2, Neto2, Rasgrf1, Kcns3, Camk2d, Grin2a, Kcnk13, Trpc4, Atp2b1, Kcnh3, Prkd1, Ryr3, Kcnq5, Kcnd2, Rasgrf2, Htr2c, Ramp3…
GO:0006939	2.3e-07	6.64	1	22	74	smooth muscle contraction	BP	F2r, Pde4d, Dlg1, Ptger3, Sstr2, Npy1r, Htr2a, Chrm3, Tacr3, Cav1, Sulf2, Npy2r, Chrm1, Chrna3, Htr7, Adora1, Npnt, Kit, Oxtr, Adra1a, Tshz3, Chrm2
GO:0008227	2.41e-07	6.62	1	12	27	G-protein coupled amine receptor activity	MF	Chrm4, Htr2a, Chrm3, Hrh1, Chrm1, Htr7, Htr2c, Adra1a, Chrm2, Htr4, Htr1b, Htr1a
GO:0007200	2.48e-07	6.61	1	17	52	phospholipase C-activating G-protein coupled receptor signaling pathway	BP	F2r, Chrm4, Ptger3, Htr2a, Chrm3, Hcrtr2, Gpr139, Hrh1, Chrm1, S1pr1, Plce1, Htr2c, Adra1a, Chrm2, Gng13, Npr3, Crhr1
GO:0048812	2.55e-07	6.59	1	83	523	neuron projection morphogenesis	BP	Tgfb2, Slit2, Trpc6, Slitrk4, Efna5, Tnn, Rasal1, Matn2, Plxna1, Unc5b, Syt17, Epha8, Rtn4r, Fgfr2, Nptx1, Efnb1, Sgk1, Syt4, Ephb3, Foxp1, Ptprd, Trpc5, Dcc, Ntn1, Cux2, Pak1, Reln, Cdk5r1, Eef2k, Ptprf, Sema3a, Cntnap2, Met, Twf2, Mgll, Apc, Sema5a, B3gnt2, Wasf1, Chrna3, Rap2a, Adcy1, Ntrk2, Slitrk5, Lmtk2, Clu, Gas1, Chn1, Cdh11, Chrna7, Vldlr, Nlgn1, Flrt3, Unc5d, Fmn1, Vim, Epha7, Rims2, Rg…
GO:0005539	2.87e-07	6.54	1	27	107	glycosaminoglycan binding	MF	Ctgf, Lipg, Slit2, Fgf10, Acan, Cemip, Rspo2, Rtn4r, Fgfr1, Fgfr2, Adamts15, Rtn4rl1, Serpine2, Ptprf, Nell2, Ptn, Sema5a, Pcsk6, Sfrp1, Spock3, Vegfa, Fstl1, Nov, Lpl, Nell1, Rpl29, Vcan
GO:0010648	2.92e-07	6.53	1	119	930	negative regulation of cell communication	BP	Grk5, Trib1, Tgfb2, Dlg1, Dusp6, Sorcs3, Dlc1, Ptger3, Slit2, Npy1r, Spry1, Dusp4, Htr2a, Rgs4, Fgf10, Tnn, Acvr1c, Rasal1, Cav1, Cxxc4, Unc5b, Dusp7, Kif26a, Rasa3, Ptk2b, Prex1, Rnf152, Nkd2, Rtn4r, BC048403, Shisa2, Mcc, Syt4, Rtn4rl1, Serpine2, Sulf2, Gria1, Ptprd, Ctnna1, Itgav, Inpp5k, Prickle1, Bok, Npy2r, Rora, Prkacb, Timp3, Ptprj, Phip, Ptprf, Pik3r2, Kctd13, Nlk, Grik3, Met, Bicc1, Mgl…
GO:0023057	3.18e-07	6.5	1	119	932	negative regulation of signaling	BP	Grk5, Trib1, Tgfb2, Dlg1, Dusp6, Sorcs3, Dlc1, Ptger3, Slit2, Npy1r, Spry1, Dusp4, Htr2a, Rgs4, Fgf10, Tnn, Acvr1c, Rasal1, Cav1, Cxxc4, Unc5b, Dusp7, Kif26a, Rasa3, Ptk2b, Prex1, Rnf152, Nkd2, Rtn4r, BC048403, Shisa2, Mcc, Syt4, Rtn4rl1, Serpine2, Sulf2, Gria1, Ptprd, Ctnna1, Itgav, Inpp5k, Prickle1, Bok, Npy2r, Rora, Prkacb, Timp3, Ptprj, Phip, Ptprf, Pik3r2, Kctd13, Nlk, Grik3, Met, Bicc1, Mgl…
GO:0045596	3.24e-07	6.49	1	75	507	negative regulation of cell differentiation	BP	Trib1, Brinp1, Tgfb2, Ptger3, Slit2, Trpc6, Efna5, Fgf10, Tnn, Rorb, Cav1, Pik3r1, Ptk2b, Mycn, Rtn4r, Fgfr1, Syt4, Rtn4rl1, Foxp1, Pmp22, Ctnna1, Trpc5, Itgav, Prickle1, Ntn1, Rora, Pak1, Itgb3, Cdk6, Cdk5r1, B2m, Sema3a, Xylt1, Ptn, Asap1, Il4ra, Ovol2, Grb14, Sema5a, Arntl, Ascl1, Zbtb16, Id2, Ldlrad4, Nlgn1, Ntm, Vim, Tjp2, Sfrp1, Epha7, Tgfb1i1, Rgma, Mkx, Cntn4, Ngef, Nr0b1, Bcl6, Dab1, Plk…
GO:0007411	3.34e-07	6.48	1	34	145	axon guidance	BP	Tgfb2, Slit2, Efna5, Matn2, Plxna1, Unc5b, Epha8, Efnb1, Ephb3, Foxp1, Dcc, Ntn1, Reln, Cdk5r1, Sema3a, Sema5a, B3gnt2, Lmtk2, Gas1, Chn1, Flrt3, Unc5d, Epha7, Cntn4, Alcam, Slit3, Unc5c, Etv1, Vegfa, Ephb1, Sema6a, Wnt7b, Flrt2, Ntf3
GO:0048167	3.65e-07	6.44	1	37	171	regulation of synaptic plasticity	BP	Sorcs3, Calb1, Shisa9, Ptk2b, Atp2b2, Syt4, Serpine2, Neto1, Gria1, Pak1, Reln, Hrh1, Mgll, Htr7, Ntrk2, Lrrtm2, Mef2c, Adora1, Kcnn2, Chrna7, Nlgn1, Kit, Rasgrf1, Nrgn, Grin2a, Grm5, Shisa6, Nsmf, Plk2, Nr3c1, Tnr, Rasgrf2, Tshz3, Itpka, Slc24a2, Crhr1, Grik2
GO:0060429	3.83e-07	6.42	1	103	725	epithelium development	BP	Fosl2, C1galt1, Cited2, Pou3f1, Tgfb2, Dlg1, Dlc1, Slc4a7, Thrb, Slit2, Calb1, Spry1, Fgf10, Trim16, Cldn1, Cav1, Plxna1, Pde2a, Rspo2, Aldh1a3, Mycn, Atp2b2, Sall2, Tgm3, Fat1, Fgfr1, Fgfr2, Serpine2, Foxp1, Eda, Prickle1, Ntn1, Hsd17b4, Prkacb, Pak1, Gsn, Cdk6, Itpk1, Cdkn1c, Traf6, Sema3a, Ntn4, Met, Heg1, Sema4c, Ovol2, Apc, Sema5a, Angpt1, Maged1, Ajap1, Arntl, Ascl1, Mef2c, Tnfrsf19, Gas1, …
GO:0034762	4.21e-07	6.38	1	53	312	regulation of transmembrane transport	BP	F2r, Kcnf1, Stac, Tgfb2, Scn1a, Pde4d, Dlg1, Ptger3, Hcn1, Trpc6, Cav1, Shisa9, Ptk2b, Cemip, Kcnab1, Kcng1, Neto1, Cacna1e, Cacna1h, Itgb3, Reln, B2m, Scn3b, Mef2c, Prkce, Acsl5, Atp1b1, Cacna2d3, Dpp10, Plcb1, Nlgn1, Kcnip2, Ahcyl1, Neto2, Rasgrf1, Kcns3, Camk2d, Kcnk13, Grm5, Kcnh3, Prkd1, Kcnq5, Kcnd2, Rasgrf2, Ramp3, Asic2, Coro1a, Kcnh5, Kcnj2, Kcnip4, Kcnh1, Kcng3, Crhr1
GO:0050806	4.28e-07	6.37	1	33	143	positive regulation of synaptic transmission	BP	Calb1, Cckbr, Ptk2b, Serpine2, Neto1, Gria1, Cux2, Pak1, Reln, Glul, Gria4, Htr7, Ntrk2, Lrrtm2, Prkce, Adora1, Chrna7, Nlgn1, Clstn2, Oxtr, Nrgn, Grin2a, Rims2, Plk2, Tnr, Rasgrf2, Htr2c, Adra1a, Tshz3, Syt1, Slc24a2, Crhr1, Grik2
GO:0055065	4.39e-07	6.36	1	60	379	metal ion homeostasis	BP	F2r, Tmtc2, Tgfb2, Pde4d, Ptger3, Trpc6, Calb1, Slc24a4, Npy1r, Cckbr, Htr2a, Hcrtr2, Cav1, Ptk2b, Nr3c2, Cemip, Cacna1i, Trhr, Atp2b2, Swap70, Sgk1, Gpr6, Trpv6, Trpc5, Itgav, Bok, Atp2a2, Slc30a3, Npy2r, Itgb3, B2m, Letmd1, Micu1, Sfxn5, S1pr1, Prkce, Adora1, Atp1b1, Mcu, Cib2, Chrna7, Mt1, Oxtr, Mchr1, Camk2d, Grin2a, Avpr1a, Trpc4, Atp2b1, Prkd1, Ryr3, Calb2, Htr2c, Myc, Adra1a, Ramp3, Coro1a…
GO:0048858	4.44e-07	6.35	1	84	539	cell projection morphogenesis	BP	Tgfb2, Slit2, Trpc6, Slitrk4, Efna5, Tnn, Rasal1, Matn2, Plxna1, Unc5b, Syt17, Epha8, Rtn4r, Fgfr2, Nptx1, Efnb1, Sgk1, Syt4, Ephb3, Foxp1, Ptprd, Trpc5, Dcc, Ntn1, Cux2, Pak1, Itgb3, Reln, Cdk5r1, Eef2k, Ptprf, Sema3a, Cntnap2, Met, Twf2, Mgll, Apc, Sema5a, B3gnt2, Wasf1, Chrna3, Rap2a, Adcy1, Ntrk2, Slitrk5, Lmtk2, Clu, Gas1, Chn1, Cdh11, Chrna7, Vldlr, Nlgn1, Flrt3, Unc5d, Fmn1, Vim, Epha7, Ri…
GO:0001653	4.58e-07	6.34	1	17	57	peptide receptor activity	MF	F2r, Sstr2, Npy1r, Cckbr, Hcrtr2, Sstr1, Tacr3, Gpr139, Inpp5k, Npy2r, Sstr4, Oxtr, Mchr1, Avpr1a, Ramp3, Npr3, Crhr1
GO:0008201	4.65e-07	6.33	1	22	79	heparin binding	MF	Ctgf, Lipg, Slit2, Fgf10, Rspo2, Rtn4r, Fgfr1, Fgfr2, Adamts15, Rtn4rl1, Serpine2, Ptprf, Nell2, Ptn, Pcsk6, Sfrp1, Vegfa, Fstl1, Nov, Lpl, Nell1, Rpl29
GO:0097485	4.68e-07	6.33	1	34	147	neuron projection guidance	BP	Tgfb2, Slit2, Efna5, Matn2, Plxna1, Unc5b, Epha8, Efnb1, Ephb3, Foxp1, Dcc, Ntn1, Reln, Cdk5r1, Sema3a, Sema5a, B3gnt2, Lmtk2, Gas1, Chn1, Flrt3, Unc5d, Epha7, Cntn4, Alcam, Slit3, Unc5c, Etv1, Vegfa, Ephb1, Sema6a, Wnt7b, Flrt2, Ntf3
GO:0009888	5.1e-07	6.29	1	147	1158	tissue development	BP	Ctgf, Fosl2, C1galt1, Sik1, Tiparp, Cited2, Bmp3, Pou3f1, Tgfb2, Ets2, Gcnt2, Dlg1, Itgb8, Dusp6, Dlc1, Slc4a7, Thrb, Slit2, Calb1, Spry1, Dusp4, Fgf10, Trim16, Acan, Cldn1, Tal1, Cav1, Plxna1, Pde2a, Ptk2b, Rspo2, Aldh1a3, Mycn, Atp2b2, Sall2, Tgm3, Fat1, Fgfr1, Fgfr2, Efnb1, Serpine2, Foxp1, Sulf2, Gjc1, Eda, Itgav, Mkl2, Prickle1, Ntn1, Hsd17b4, Prkacb, Pak1, Gsn, Itgb3, Cdk6, Itpk1, Cdkn1c, M…
GO:0030545	6.87e-07	6.16	1	31	180	receptor regulator activity	MF	Ctgf, Bmp3, Tgfb2, Slit2, Efna5, Fgf10, Fndc5, Nts, Sema3a, C1qtnf4, Npy, Ptn, Inhbb, Prkce, Lypd6b, Tgfa, Flrt3, Epha7, Vegfa, Nov, Nrg3, Inhba, Pdgfc, Wnt7b, Lypd1, Bmp2, Fgf13, Flrt2, Cxcl14, Lypd6, Ntf3
GO:0007204	7.22e-07	6.14	1	34	165	positive regulation of cytosolic calcium ion concentration	BP	F2r, Tgfb2, Pde4d, Ptger3, Trpc6, Cckbr, Htr2a, Cav1, Ptk2b, Cemip, Cacna1i, Trhr, Swap70, Gpr6, Trpv6, Trpc5, Itgav, Npy2r, Itgb3, S1pr1, Prkce, Cib2, Oxtr, Mchr1, Camk2d, Grin2a, Avpr1a, Prkd1, Ryr3, Htr2c, Adra1a, Ramp3, Coro1a, Crhr1
GO:0008528	7.34e-07	6.13	1	16	53	G-protein coupled peptide receptor activity	MF	F2r, Sstr2, Npy1r, Cckbr, Hcrtr2, Sstr1, Tacr3, Gpr139, Inpp5k, Npy2r, Sstr4, Oxtr, Mchr1, Avpr1a, Ramp3, Npr3
GO:0010817	7.73e-07	6.11	1	51	297	regulation of hormone levels	BP	Tiparp, Ptger3, Slc16a1, Npy1r, Cckbr, Efna5, Htr2a, Acvr1c, Myrip, Aldh1a3, Fgfr1, Trpv6, Cacna1e, Cacna1h, Hsd17b4, Reln, Nell2, Pcsk1n, Glul, Schip1, Acvr2a, Inhbb, Arntl, Srd5a1, Prkce, Adora1, Mcu, Dkk3, Crabp1, Pim3, Pcsk6, Stxbp5l, Sfrp1, Rfx3, Rims2, Nnat, Vsnl1, Nr3c1, Htr2c, Nov, Pparg, Inhba, Pex5l, Pcsk2, Stat5b, Ildr2, Bmp2, Crhr1, Htr1a, Nr1d1, Crym
GO:0003018	8.03e-07	6.1	1	28	118	vascular process in circulatory system	BP	F2r, Ptger3, Slit2, Npy1r, Htr2a, Chrm3, Cav1, Pde2a, Nts, Ptprj, Hrh1, Chrm1, Mgll, Angpt1, Htr7, Pde3a, Adora1, Ahr, Oxtr, Avpr1a, Vegfa, Nr3c1, Htr2c, Adra1a, Gpx1, Asic2, Htr1b, Htr1a
GO:0046903	8.72e-07	6.06	1	98	715	secretion	BP	Ctgf, F2r, Tgfb2, Ptger3, Rab3c, Rasgrp1, Slc16a1, Npy1r, Cckbr, Efna5, Htr2a, Fgf10, Chrm3, Trim16, Acvr1c, Myrip, Cav1, Parp1, Syt17, Cacna1i, Atp2b2, Nkd2, Lin7b, Fgfr1, Syt4, Nrxn3, Trpv6, Serpine2, Foxp1, Cacna1e, Cacna1h, Itgav, Atp2a2, Npy2r, Pak1, Cadm1, Nell2, Traf6, Chrm1, Glul, Otof, Il4ra, Angpt1, Chrna3, Acvr2a, Inhbb, Htr7, Rab31, Arntl, Ntrk2, Sdc1, Mef2c, Prkce, Adora1, Mcu, Ephb6…
GO:0060359	8.93e-07	6.05	1	20	73	response to ammonium ion	BP	Chrm4, Htr2a, Chrm3, Tacr3, Parp1, Cdk5r1, Hrh1, Chrm1, Chrna3, Rgs8, Prkce, Gabrb3, Chrna7, Plcb1, Sdk1, Gabra1, Chrm2, Lypd1, Htr1b, Crhr1
GO:0120039	9.42e-07	6.03	1	83	535	plasma membrane bounded cell projection morphogenesis	BP	Tgfb2, Slit2, Trpc6, Slitrk4, Efna5, Tnn, Rasal1, Matn2, Plxna1, Unc5b, Syt17, Epha8, Rtn4r, Fgfr2, Nptx1, Efnb1, Sgk1, Syt4, Ephb3, Foxp1, Ptprd, Trpc5, Dcc, Ntn1, Cux2, Pak1, Reln, Cdk5r1, Eef2k, Ptprf, Sema3a, Cntnap2, Met, Twf2, Mgll, Apc, Sema5a, B3gnt2, Wasf1, Chrna3, Rap2a, Adcy1, Ntrk2, Slitrk5, Lmtk2, Clu, Gas1, Chn1, Cdh11, Chrna7, Vldlr, Nlgn1, Flrt3, Unc5d, Fmn1, Vim, Epha7, Rims2, Rg…
GO:0044089	1.01e-06	6	1	62	383	positive regulation of cellular component biogenesis	BP	Ctgf, Tpbg, Dlg1, Slitrk4, Efna5, Cldn1, Tal1, Cav1, Ptk2b, Swap70, Ephb3, Ptprd, S100a10, Cux2, Pak1, Gsn, Eef2k, Ptprj, Met, Asap1, Twf2, Apc, Wasf1, Sub1, Cbln2, Bcl2l11, Ntrk2, Lrrtm2, Slitrk5, Sdc1, Clu, Prkce, Spire1, Lrrn3, Psrc1, Ahr, Cdc42ep3, Nlgn1, Clstn2, Kit, Phldb2, Oxtr, Flrt3, Fmn1, Gpsm2, Lrrtm4, Lrrn1, Il1rapl1, Vegfa, Has3, Ephb1, Lingo2, Iqgap2, Il1rap, Asic2, Ppm1e, Coro1a, S…
GO:0051270	1.05e-06	5.98	1	86	582	regulation of cellular component movement	BP	F2r, Trib1, Cited2, Tgfb2, Pde4d, Gcnt2, Dlg1, Dlc1, Ptger3, Slit2, Fgf10, Acvr1c, Acan, Tacr3, Cav1, Plxna1, Pik3r1, Ptk2b, Ptpru, Cemip, Prex1, Ccbe1, Swap70, Fgfr1, Mcc, Ctnna1, Itgav, Ntn1, Atp2a2, Pak1, Gsn, Itgb3, Reln, Ptprj, Sema3a, Ptn, Met, Apc, Sema5a, Angpt1, Cdh13, Amotl1, Rap2a, S1pr1, Prkce, Adora1, Mpp1, Sash1, Ldlrad4, Plcb1, Kit, Phldb2, Unc5d, Lmo4, Vim, Bmper, Camk2d, Sfrp1, B…
GO:0098662	1.06e-06	5.97	1	59	382	inorganic cation transmembrane transport	BP	F2r, Kcnf1, Stac, Tgfb2, Pde4d, Dlg1, Ptger3, Hcn1, Trpc6, Htr2a, Cav1, Ptk2b, Cemip, Kcnab1, Kcng1, Atp2b2, Trpv6, Neto1, Trpc5, Cacna1e, Cacna1h, Itgav, Atp2a2, Itgb3, B2m, Hrh1, Scn3b, Micu1, Prkce, Kcnn2, Atp1b1, Mcu, Cacna2d3, Dpp10, Plcb1, Kcnip2, Neto2, Kcns3, Camk2d, Grin2a, Kcnk13, Trpc4, Atp2b1, Kcnh3, Prkd1, Ryr3, Kcnq5, Kcnd2, Htr2c, Ramp3, Coro1a, Kcnh5, Kcnj2, Kcnip4, Kcnh1, Slc24a2…
GO:0010975	1.07e-06	5.97	1	72	456	regulation of neuron projection development	BP	Chodl, Slit2, Trpc6, Efna5, Rasal1, Plxna1, Syt17, Ptk2b, Prex1, Rtn4r, Fgfr1, Sgk1, Syt4, Rtn4rl1, Ephb3, Serpine2, Ptprd, Pmp22, Trpc5, Dcc, Ntn1, Cux2, Pak1, Csmd3, Reln, Cdk5r1, Eef2k, B2m, Ptprf, Sema3a, Xylt1, Foxo6, Ptn, Met, Asap1, Twf2, Mgll, Sema5a, Negr1, Chrna3, Rap2a, Htr7, Ntrk2, Enc1, Gprc5b, Mef2c, Chn1, Vldlr, Nlgn1, Ntm, Vim, Sdk1, Sfrp1, Epha7, Rims2, Rgma, Ngef, Prkd1, Il1rapl…
GO:0042391	1.28e-06	5.89	1	53	314	regulation of membrane potential	BP	Scn1a, Dlg1, Hcn1, Pmaip1, Cav1, Parp1, Ptk2b, Cacna1i, Neto1, Gria1, Trpc5, Cacna1e, Cacna1h, Bok, Atp2a2, Npy2r, Cux2, Reln, Ptn, Grik3, Met, Scn3b, Chrna3, Piezo2, Mef2c, Prkce, Gjd2, Adora1, Kcnn2, Atp1b1, Gabrb3, Chrna7, Nlgn1, Kcnip2, Gabra1, Camk2d, Grin2a, Rims2, Kcnk13, Cnga4, Kcnh3, Kcnd2, Myc, Adra1a, Pkp2, Asic2, Pex5l, Kcnh5, Kcnj2, Kcnh1, Kcnk9, Fgf13, Grik2
GO:1901700	1.48e-06	5.83	0.999999	111	869	response to oxygen-containing compound	BP	Mest, Fosl2, F2r, Brinp3, Trib1, Brinp1, Tgfb2, Chrm4, Pde4d, Ptger3, Hcn1, Slit2, Trpc6, Sstr2, Gpr22, Efna5, Htr2a, Chrm3, Trim16, Hcrtr2, Sstr1, Acvr1c, Rorb, Tacr3, Cav1, Parp1, Cad, Pde2a, Pik3r1, Ptk2b, Net1, Sgk1, Foxp1, Ctnna1, Cacna1e, Itgav, Inpp5k, Atp2a2, Rora, Pak1, Cdk6, Akt3, Cdk5r1, Grin3a, Phip, Ptprf, Traf6, Chrm1, Pik3r2, Glul, Met, Twf2, Prkcd, Prdx6, Hsph1, Adcy2, Grb14, Apc,…
GO:1901681	1.72e-06	5.76	0.999999	30	146	sulfur compound binding	MF	Ctgf, Lipg, Slit2, Fgf10, Rspo2, Rtn4r, Fgfr1, Fgfr2, Adamts15, Chst15, Rtn4rl1, Serpine2, Gpc6, Ptprf, Nell2, Ptn, Sema5a, Slc6a6, Pcx, Pcsk6, Sfrp1, Lrrtm4, Vegfa, Fstl1, Nov, Lpl, Nell1, Gpc5, Rpl29, Fst
GO:0007613	1.95e-06	5.71	0.999999	26	106	memory	BP	Brinp1, Adcy8, Sorcs3, Calb1, Htr2a, Sgk1, Syt4, Neto1, Gria1, Cux2, Reln, Hrh1, Foxo6, Camk4, Htr7, Adcy1, Ntrk2, Chrna7, Plcb1, Oxtr, Grin2a, Grm7, Plk2, Slc24a2, Crhr1, Fgf13
GO:0007213	1.99e-06	5.7	1	7	10	G-protein coupled acetylcholine receptor signaling pathway	BP	Chrm4, Chrm3, Cdk5r1, Chrm1, Rgs8, Plcb1, Chrm2
GO:0032990	2.06e-06	5.69	0.999999	84	558	cell part morphogenesis	BP	Tgfb2, Slit2, Trpc6, Slitrk4, Efna5, Tnn, Rasal1, Matn2, Plxna1, Unc5b, Syt17, Epha8, Rtn4r, Fgfr2, Nptx1, Efnb1, Sgk1, Syt4, Ephb3, Foxp1, Ptprd, Trpc5, Dcc, Ntn1, Cux2, Pak1, Itgb3, Reln, Cdk5r1, Eef2k, Ptprf, Sema3a, Cntnap2, Met, Twf2, Mgll, Apc, Sema5a, B3gnt2, Wasf1, Chrna3, Rap2a, Adcy1, Ntrk2, Slitrk5, Lmtk2, Clu, Gas1, Chn1, Cdh11, Chrna7, Vldlr, Nlgn1, Flrt3, Unc5d, Fmn1, Vim, Epha7, Ri…
GO:0031589	2.07e-06	5.68	0.999999	42	217	cell-substrate adhesion	BP	Ctgf, Gcnt2, Dlc1, Efna5, Tnn, Pik3r1, Ptk2b, Prex1, Sirpa, Net1, Ephb3, Eda, Itgav, S100a10, Npy2r, Itgb3, Cdk6, Ptprj, Ptn, Angpt1, Cdh13, Ajap1, Bcl2l11, Prkce, Npnt, Phldb2, Col26a1, Fmn1, Sfrp1, Utrn, Bcl6, Actn1, Itgb4, Vegfa, Edil3, Ephb1, Fzd7, Coro1a, Onecut2, Ptprk, Rpl29, Itga4
GO:0070371	2.19e-06	5.66	0.999999	35	185	ERK1 and ERK2 cascade	BP	Ctgf, F2r, Gcnt2, Dlg1, Dusp6, Rasgrp1, Spry1, Cckbr, Dusp4, Htr2a, Fgf10, Cav1, Ptk2b, Fgfr2, Dcc, Itgav, Timp3, Itgb3, Angpt1, Chrna7, Npnt, Oxtr, Bmper, Camk2d, Epha7, Tnfrsf11a, Vegfa, Ephb1, Htr2c, Myc, Adra1a, Ramp3, Pdgfc, Fbxw7, Bmp2
GO:0009887	2.38e-06	5.62	0.999999	92	636	animal organ morphogenesis	BP	Ctgf, Tiparp, Cited2, Tgfb2, Dlg1, Dlc1, Slc4a7, Thrb, Hcn1, Slit2, Calb1, Slc24a4, Fjx1, Npy1r, Spry1, Fgf10, Acan, Rorb, Cav1, Plxna1, Capn1, Rspo2, Aldh1a3, Tmie, Mycn, Atp2b2, Fat1, Fgfr1, Fgfr2, Sulf2, Eda, Itgav, Mkl2, Sobp, Ntn1, Npy2r, Akt3, Traf6, Sema3a, Ntn4, Ptn, Met, Schip1, Heg1, Ovol2, Apc, Angpt1, Maged1, Ajap1, Bcl2l11, Ntrk2, S1pr1, Mef2c, Mmp16, Gas1, Tgfa, Whrn, Id2, Serpinh1,…
GO:0007215	2.39e-06	5.62	0.999999	20	66	glutamate receptor signaling pathway	BP	Sstr1, Shisa9, Ptk2b, Neto1, Reln, Cdk5r1, Grin3a, Grm4, Grik3, Mef2c, Plcb1, Nlgn1, Neto2, Rasgrf1, Grin2a, Grm5, Grm7, Rasgrf2, Grm8, Cpeb4
GO:0007169	2.49e-06	5.6	0.999999	63	393	transmembrane receptor protein tyrosine kinase signaling pathway	BP	Ctgf, Tiparp, Dusp6, Spry1, Efna5, Fgf10, Pik3r1, Ptk2b, Ccbe1, Dok4, Epha8, Fgfr1, Fgfr2, Shisa2, Efnb1, Ephb3, Igfbp4, Sulf2, Inpp5k, Pak1, Itgb3, Cdk5r1, Ptprj, Hip1, Phip, Ptprf, Pik3r2, Met, Schip1, Prkcd, Grb14, Apc, Angpt1, Wasf1, Chrna3, Cdh13, Ntrk2, Ptprt, Lmtk2, Cblb, Tgfa, Adora1, Chn1, Ephb6, Plcb1, Kit, Flrt3, Adamts3, Epha7, Ngef, Gfra1, Prkd1, Epha6, Vegfa, Ephb1, Pdgfc, Fbxw7, Lc…
GO:0010033	2.57e-06	5.59	0.999999	192	1716	response to organic substance	BP	Mest, Ctgf, Fosl2, F2r, Brinp3, Trib1, Sik1, Tiparp, Cited2, Brinp1, Bmp3, Tgfb2, Chrm4, Pde4d, Gcnt2, Dusp6, Thrb, Ptger3, Hcn1, Slit2, Calb1, Sstr2, Slc16a1, Spry1, Gpr22, Efna5, Htr2a, Fgf10, Chrm3, Trim16, Hcrtr2, Sstr1, Acvr1c, Rorb, Tacr3, Cldn1, Cav1, Parp1, Cad, Pde2a, Pik3r1, Ptk2b, Nr3c2, Ccbe1, Epha8, Rftn1, Rtn4r, Fgfr1, Fgfr2, Egr3, Shisa2, Sgk1, Rtn4rl1, Foxp1, Sulf2, Ctnna1, Cacna1…
GO:0048018	2.58e-06	5.59	0.999999	27	156	receptor ligand activity	MF	Ctgf, Bmp3, Tgfb2, Slit2, Efna5, Fgf10, Fndc5, Nts, Sema3a, C1qtnf4, Npy, Ptn, Inhbb, Tgfa, Flrt3, Epha7, Vegfa, Nov, Nrg3, Inhba, Pdgfc, Wnt7b, Bmp2, Fgf13, Flrt2, Cxcl14, Ntf3
GO:0097756	2.78e-06	5.56	0.999999	19	65	negative regulation of blood vessel diameter	BP	F2r, Ptger3, Npy1r, Htr2a, Chrm3, Cav1, Hrh1, Chrm1, Mgll, Htr7, Adora1, Ahr, Oxtr, Avpr1a, Htr2c, Adra1a, Asic2, Htr1b, Htr1a
GO:0048513	2.86e-06	5.54	0.999998	230	2047	animal organ development	BP	Pgap1, Ctgf, Fosl2, Klhl1, C1galt1, Trib1, Sik1, Tiparp, Cited2, Bmp3, Tex15, Pou3f1, Tgfb2, Gcnt2, Dlg1, Itgb8, Dusp6, Ptchd1, Dlc1, Slc4a7, Thrb, Ptger3, Hcn1, Slit2, Rasgrp1, Calb1, Slc24a4, Fjx1, Npy1r, Spry1, Cckbr, Efna5, Fgf10, Trim16, Acan, Rorb, Cldn1, Tal1, Cav1, Plxna1, Pde2a, Capn1, Pik3r1, Ptk2b, Fzd8, Prex1, Rspo2, Ccbe1, Aldh1a3, Tmie, Mycn, Atp2b2, Sirpa, Sall2, Tgm3, Rtn4r, Sez6l…
GO:0048583	2.86e-06	5.54	0.999998	247	2302	regulation of response to stimulus	BP	Ctgf, F2r, Grk5, Trib1, Cited2, Bmp3, Tex15, Tgfb2, Pde4d, Gcnt2, Dlg1, Dusp6, Dlc1, Rbpms, Ptger3, Pmaip1, Slit2, Rasgrp1, Gabra4, Spry1, Efna5, Dusp4, Htr2a, Fam46a, Rgs4, Fgf10, Trim16, Tnn, Klf14, Rasal1, Cav1, Plxna1, Cxxc4, Unc5b, Parp1, Dusp7, Shisa9, Kif26a, Rasa3, Pde2a, Pik3r1, Ptk2b, Fzd8, Prex1, Sphkap, Rspo2, Ccbe1, Aldh1a3, Rnf152, Arhgef17, Nkd2, Tril, Epha8, Rftn1, Rtn4r, BC048403…
GO:0042562	2.92e-06	5.53	0.999999	16	53	hormone binding	MF	Thrb, Sult2b1, Hcrtr2, Pik3r1, Nr3c2, Aldh1a3, Cdh13, Oxtr, Mchr1, Avpr1a, Nr3c1, Inhba, Npr3, Rxfp1, Crhr1, Crym
GO:0006937	2.99e-06	5.52	0.999999	24	98	regulation of muscle contraction	BP	Ctgf, F2r, Pde4d, Dlg1, Ptger3, Sstr2, Chrm3, Tacr3, Cav1, Atp2a2, Npy2r, Chrm1, Smtn, Chrna3, Adora1, Atp1b1, Npnt, Kit, Oxtr, Adra1a, Pkp2, Chrm2, Kcnj2, Fgf13
GO:0050974	3.19e-06	5.5	1	11	25	detection of mechanical stimulus involved in sensory perception	BP	Scn1a, Htr2a, Atp2b2, Serpine2, Htr7, Piezo2, Kit, Myc, Asic2, Grm8, Pcdh15
GO:0001822	3.23e-06	5.49	0.999999	37	182	kidney development	BP	C1galt1, Tiparp, Tgfb2, Dlg1, Slit2, Calb1, Spry1, Fgf10, Fgfr1, Fgfr2, Sulf2, Itgb3, Cdkn1c, Schip1, Apc, Angpt1, Maged1, Bcl2l11, Mef2c, Zbtb16, Id2, Ahr, Npnt, Prom1, Fmn1, Bmper, Eya1, Sfrp1, Epha7, Plce1, Vegfa, Myc, Tshz3, Wt1, Wnt7b, Bmp2, Vcan
GO:2000145	3.43e-06	5.46	0.999998	77	516	regulation of cell motility	BP	F2r, Trib1, Cited2, Tgfb2, Gcnt2, Dlc1, Ptger3, Slit2, Fgf10, Acvr1c, Acan, Tacr3, Plxna1, Pik3r1, Ptk2b, Ptpru, Cemip, Prex1, Ccbe1, Swap70, Fgfr1, Mcc, Ctnna1, Itgav, Ntn1, Pak1, Gsn, Itgb3, Reln, Ptprj, Sema3a, Ptn, Met, Apc, Sema5a, Angpt1, Cdh13, Amotl1, Rap2a, S1pr1, Prkce, Adora1, Mpp1, Sash1, Ldlrad4, Plcb1, Kit, Phldb2, Unc5d, Lmo4, Vim, Bmper, Camk2d, Sfrp1, Prkd1, Scrt1, Unc5c, Nsmf, V…
GO:0006936	3.43e-06	5.46	0.999999	37	189	muscle contraction	BP	Ctgf, F2r, Stac, Scn1a, Pde4d, Dlg1, Ptger3, Sstr2, Npy1r, Htr2a, Chrm3, Tacr3, Cav1, Sulf2, Atp2a2, Npy2r, Chrm1, Met, Scn3b, Smtn, Chrna3, Htr7, Adora1, Kcnn2, Atp1b1, Npnt, Kit, Oxtr, Camk2d, Ryr3, Adra1a, Tshz3, Pkp2, Myh3, Chrm2, Kcnj2, Synm
GO:0030308	3.43e-06	5.46	0.999999	27	132	negative regulation of cell growth	BP	Tgfb2, Slit2, Nme6, Rtn4r, Smarca2, Serpine2, Foxp1, Ntn1, Pak1, Cdk5r1, Ptprj, Sema3a, Sema5a, Gas1, Psrc1, Sfrp1, Epha7, Rgma, Bcl6, Slit3, Tnr, Sh3bp4, Nov, Pparg, Inhba, Wt1, Fgf13
GO:0065007	3.62e-06	5.44	0.999998	661	7328	biological regulation	BP	Mest, Ctgf, Fosl2, F2r, Slc5a3, Brinp3, Grk5, Trib1, Pdlim1, Maml3, Tmtc2, Kcnf1, Sik1, Tiparp, Cited2, Stac, Brinp1, Adcy8, Bmp3, Tex15, Gpr26, Pou3f1, Lipg, Tpbg, Nedd9, Tgfb2, Ets2, Spsb1, Abcd2, Elmo1, Scn1a, Chrm4, Pde4d, Gcnt2, Dlg1, Hunk, Itgb8, Dusp6, Ptchd1, Sorcs3, Dlc1, Rbpms, Chml, Slc4a7, Thrb, Ptger3, Rab3c, Arhgap20, Hcn1, Chodl, Pmaip1, Trhde, Slit2, Rasgrp1, Trpc6, Calb1, Slc24a4…
GO:0032940	3.65e-06	5.44	0.999998	88	642	secretion by cell	BP	Ctgf, F2r, Tgfb2, Ptger3, Rab3c, Rasgrp1, Slc16a1, Npy1r, Cckbr, Efna5, Htr2a, Fgf10, Trim16, Acvr1c, Myrip, Parp1, Syt17, Cacna1i, Nkd2, Lin7b, Fgfr1, Syt4, Nrxn3, Trpv6, Serpine2, Foxp1, Cacna1e, Cacna1h, Itgav, Atp2a2, Npy2r, Pak1, Cadm1, Nell2, Traf6, Glul, Otof, Il4ra, Angpt1, Chrna3, Acvr2a, Inhbb, Htr7, Rab31, Arntl, Ntrk2, Sdc1, Mef2c, Prkce, Adora1, Mcu, Ephb6, Chrna7, Sptbn2, Pim3, Nlgn…
GO:0022890	3.79e-06	5.42	0.999998	57	364	inorganic cation transmembrane transporter activity	MF	Kcnf1, Scn1a, Slc4a7, Hcn1, Trpc6, Slc24a4, Rasa3, Ptk2b, Kcnab1, Cacna1i, Kcng1, Atp2b2, Trpv6, Gria1, Trpc5, Cacna1e, Cacna1h, Itgav, Atp2a2, Slc30a3, Slc4a4, Grin3a, Hrh1, Grik3, Scn3b, Chrna3, Gria4, Slc6a6, Kcnn2, Atp1b1, Mcu, Chrna7, Cacna2d3, Slc20a1, Kcnip2, Kcns3, Grin2a, Kcnk13, Cnga4, Trpc4, Gria3, Atp2b1, Kcnh3, Il1rapl1, Grm7, Ryr3, Kcnq5, Kcnd2, Asic2, Kcnh5, Kcnj2, Kcnip4, Kcnh1, S…
GO:0050890	3.88e-06	5.41	0.999998	44	239	cognition	BP	Brinp1, Adcy8, Ptchd1, Sorcs3, Calb1, Htr2a, Kcnab1, Sgk1, Syt4, Nts, Neto1, Gria1, Cacna1e, Sobp, Cux2, Pak1, Reln, Hrh1, Chrm1, Foxo6, Grm4, Ptn, Cntnap2, Camk4, Htr7, Adcy1, Ntrk2, Mef2c, Adora1, Chrna7, Plcb1, Kit, Oxtr, Gatm, Grin2a, Grm5, Grm7, Plk2, Tnr, Gabra5, Slc24a2, Crhr1, Fgf13, Foxp2
GO:0006928	4.51e-06	5.35	0.999997	152	1230	movement of cell or subcellular component	BP	Ctgf, F2r, Trib1, Cited2, Tgfb2, Elmo1, Scn1a, Pde4d, Gcnt2, Dlg1, Dlc1, Ptger3, Slit2, Rasgrp1, Efna5, Fgf10, Tnn, Acvr1c, Acan, Tacr3, Myrip, Cav1, Matn2, Plxna1, Unc5b, Pik3r1, Ptk2b, Ptpru, Cemip, Prex1, Ccbe1, Sirpa, Epha8, Swap70, Fgfr1, Net1, Egr3, Efnb1, Mcc, Ephb3, Foxp1, Ctnna1, Cacna1e, Dcc, Itgav, Mkl2, Ntn1, Gpc6, Pak1, Gsn, Itgb3, Reln, Cdk5r1, Ptprj, Ptprf, Hrh1, Sema3a, Kif21b, Kc…
GO:0003012	5.39e-06	5.27	0.999998	46	264	muscle system process	BP	Ctgf, F2r, Stac, Scn1a, Pde4d, Dlg1, Ptger3, Sstr2, Npy1r, Htr2a, Chrm3, Tacr3, Cav1, Parp1, Foxp1, Sulf2, Atp2a2, Npy2r, Pak1, Gsn, Chrm1, Met, Scn3b, Smtn, Chrna3, Htr7, Mef2c, Jarid2, Adora1, Kcnn2, Atp1b1, Npnt, Kit, Oxtr, Camk2d, Gatm, Ryr3, Nr3c1, Adra1a, Tshz3, Pkp2, Hey2, Myh3, Chrm2, Kcnj2, Synm
GO:0006873	5.53e-06	5.26	0.999997	59	396	cellular ion homeostasis	BP	F2r, Tgfb2, Pde4d, Slc4a7, Ptger3, Trpc6, Calb1, Slc24a4, Npy1r, Cckbr, Htr2a, Hcrtr2, Cav1, Ptk2b, Nr3c2, Cemip, Cacna1i, Trhr, Atp2b2, Swap70, Sgk1, Gpr6, Trpv6, Trpc5, Itgav, Bok, Atp2a2, Slc30a3, Slc4a4, Npy2r, Xpr1, Itgb3, Letmd1, Micu1, S1pr1, Prkce, Atp1b1, Mcu, Cib2, Chrna7, Mt1, Oxtr, Mchr1, Camk2d, Grin2a, Avpr1a, Trpc4, Atp2b1, Prkd1, Ryr3, Calb2, Htr2c, Myc, Adra1a, Ramp3, Coro1a, Slc…
GO:0071242	5.58e-06	5.25	0.999999	13	39	cellular response to ammonium ion	BP	Chrm4, Chrm3, Cdk5r1, Hrh1, Chrm1, Chrna3, Rgs8, Gabrb3, Chrna7, Plcb1, Gabra1, Chrm2, Lypd1
GO:0001934	5.6e-06	5.25	0.999997	83	611	positive regulation of protein phosphorylation	BP	Ctgf, F2r, Bmp3, Tgfb2, Gcnt2, Dlg1, Rbpms, Ptger3, Rasgrp1, Trpc6, Efna5, Htr2a, Fgf10, Cav1, Pik3r1, Ptk2b, Cemip, Fzd8, Epha8, Fgfr1, Fgfr2, Peli2, Igfbp4, Trpc5, Dcc, Itgav, Pak1, Itgb3, Pik3r5, Reln, Cdk5r1, Phip, Traf6, Grm4, Met, Sema4c, Prkcd, Hsph1, Angpt1, Chrna3, Maged1, Rap2a, Acvr2a, Inhbb, Ntrk2, Gprc5b, Tnfrsf19, Clu, Prkce, Tgfa, Adora1, Lrrn3, Sstr4, Ksr1, Sash1, Chrna7, Psrc1, N…
GO:0030003	5.77e-06	5.24	0.999997	58	388	cellular cation homeostasis	BP	F2r, Tgfb2, Pde4d, Slc4a7, Ptger3, Trpc6, Calb1, Slc24a4, Npy1r, Cckbr, Htr2a, Hcrtr2, Cav1, Ptk2b, Nr3c2, Cemip, Cacna1i, Trhr, Atp2b2, Swap70, Sgk1, Gpr6, Trpv6, Trpc5, Itgav, Bok, Atp2a2, Slc30a3, Slc4a4, Npy2r, Itgb3, Letmd1, Micu1, S1pr1, Prkce, Atp1b1, Mcu, Cib2, Chrna7, Mt1, Oxtr, Mchr1, Camk2d, Grin2a, Avpr1a, Trpc4, Atp2b1, Prkd1, Ryr3, Calb2, Htr2c, Myc, Adra1a, Ramp3, Coro1a, Slc24a2, …
GO:0030334	5.78e-06	5.24	0.999997	74	494	regulation of cell migration	BP	F2r, Trib1, Cited2, Tgfb2, Gcnt2, Dlc1, Ptger3, Slit2, Fgf10, Acvr1c, Acan, Plxna1, Pik3r1, Ptk2b, Ptpru, Cemip, Prex1, Ccbe1, Swap70, Fgfr1, Mcc, Itgav, Ntn1, Pak1, Gsn, Itgb3, Reln, Ptprj, Sema3a, Ptn, Met, Apc, Sema5a, Angpt1, Cdh13, Amotl1, Rap2a, S1pr1, Prkce, Adora1, Mpp1, Sash1, Ldlrad4, Plcb1, Kit, Phldb2, Unc5d, Lmo4, Vim, Bmper, Camk2d, Sfrp1, Prkd1, Scrt1, Unc5c, Nsmf, Vegfa, Myc, Nov,…
GO:0022603	5.84e-06	5.23	0.999997	94	676	regulation of anatomical structure morphogenesis	BP	Cited2, Tgfb2, Dlg1, Dusp6, Dlc1, Slit2, Trpc6, Spry1, Efna5, Ism1, Fgf10, Rasal1, Plxna1, Syt17, Ptk2b, Prex1, Rspo2, Ccbe1, Rtn4r, Fgfr1, Fgfr2, Net1, Sgk1, Syt4, Ephb3, Sulf2, Ptprd, Trpc5, Ntn1, S100a10, Cux2, Pak1, Gsn, Itgb3, Reln, Cdk5r1, Eef2k, Phip, Ptprf, Sema3a, Ntn4, Ptn, Met, Il4ra, Twf2, Mgll, Apc, Sema5a, Strip2, Bambi, Chrna3, Maged1, Rap2a, Ajap1, Coch, Ntrk2, Mef2c, Chn1, Sash1,…
GO:0055085	5.85e-06	5.23	0.999997	92	721	transmembrane transport	BP	F2r, Slc5a3, Kcnf1, Stac, Tgfb2, Abcd2, Scn1a, Pde4d, Dlg1, Ptger3, Hcn1, Trpc6, Slc24a4, Slc16a1, Htr2a, Cav1, Shisa9, Ptk2b, Cemip, Kcnab1, Kcng1, Atp2b2, Trpv6, Neto1, Gria1, Trpc5, Cacna1e, Cacna1h, Gjc1, Itgav, Atp2a2, Slc30a3, Xpr1, Itgb3, Slc22a3, Reln, B2m, Hrh1, Slc29a4, Slc25a1, Scn3b, Abcc5, Micu1, Sfxn5, Glra2, Mef2c, Prkce, Acsl5, Kcnn2, Atp1b1, Mcu, Gabrb3, Chrna7, Cacna2d3, Dpp10, …
GO:1902531	5.87e-06	5.23	0.999997	134	1110	regulation of intracellular signal transduction	BP	Ctgf, F2r, Trib1, Bmp3, Tgfb2, Pde4d, Gcnt2, Dlg1, Dusp6, Dlc1, Pmaip1, Slit2, Rasgrp1, Spry1, Dusp4, Htr2a, Fgf10, Rasal1, Cav1, Unc5b, Parp1, Dusp7, Rasa3, Ptk2b, Fzd8, Prex1, Sphkap, Rnf152, Arhgef17, Epha8, Rtn4r, BC048403, Sez6l, Fgfr1, Fgfr2, Net1, Peli2, Rtn4rl1, Igfbp4, Serpine2, Ptprd, Dcc, Eda, Itgav, Inpp5k, Bok, Rora, Pak1, Timp3, Itgb3, Pik3r5, Akt3, Reln, Cdk5r1, Ptprj, Traf6, Pik3r…
GO:1901701	6.27e-06	5.2	0.999997	85	626	cellular response to oxygen-containing compound	BP	Brinp3, Trib1, Brinp1, Chrm4, Pde4d, Ptger3, Hcn1, Slit2, Trpc6, Sstr2, Efna5, Chrm3, Sstr1, Rorb, Cav1, Parp1, Pde2a, Pik3r1, Ptk2b, Net1, Sgk1, Foxp1, Ctnna1, Cacna1e, Inpp5k, Rora, Pak1, Cdk6, Akt3, Cdk5r1, Phip, Ptprf, Traf6, Chrm1, Pik3r2, Met, Twf2, Prkcd, Hsph1, Adcy2, Grb14, Apc, Chrna3, Nrip1, Inhbb, Rab31, Ntrk2, Glra2, Pde3a, Rgs8, Mef2c, Rps6ka2, Clu, Prkce, Sash1, Cib2, Chrna7, Mt1, …
GO:1903530	6.4e-06	5.19	0.999997	68	468	regulation of secretion by cell	BP	F2r, Tgfb2, Ptger3, Rab3c, Rasgrp1, Slc16a1, Npy1r, Cckbr, Efna5, Htr2a, Trim16, Acvr1c, Myrip, Parp1, Syt17, Cacna1i, Fgfr1, Syt4, Cacna1e, Cacna1h, Atp2a2, Npy2r, Cadm1, Nell2, Traf6, Glul, Il4ra, Angpt1, Chrna3, Acvr2a, Inhbb, Htr7, Arntl, Ntrk2, Sdc1, Mef2c, Prkce, Adora1, Mcu, Chrna7, Pim3, Nlgn1, Oxtr, Stxbp5l, Sfrp1, Rfx3, Rims2, Avpr1a, Nnat, Il1rapl1, Vsnl1, Grm7, Nr3c1, Htr2c, Nov, Cadp…
GO:0045499	6.67e-06	5.18	1	7	10	chemorepellent activity	MF	Slit2, Efna5, Sema3a, Flrt3, Epha7, Nrg3, Flrt2
GO:0015075	7.04e-06	5.15	0.999996	77	565	ion transmembrane transporter activity	MF	Kcnf1, Scn1a, Slc4a7, Hcn1, Trpc6, Slc24a4, Slc16a1, Gabra4, Rasa3, Ptk2b, Kcnab1, Cacna1i, Kcng1, Atp2b2, Slco3a1, Trpv6, Gria1, Trpc5, Cacna1e, Cacna1h, Gjc1, Itgav, Atp2a2, Slc30a3, Slc4a4, Xpr1, Slc22a3, Grin3a, Hrh1, Grik3, Slc25a1, Scn3b, Abcc5, Serinc2, Chrna3, Gria4, Piezo2, Sfxn5, Glra2, Slc6a6, Kcnn2, Atp1b1, Mcu, Gabrb3, Chrna7, Cacna2d3, Gabrg3, Slc20a1, Kcnip2, Kcns3, Gabra1, Grin2a,…
GO:0001823	7.37e-06	5.13	0.999998	19	69	mesonephros development	BP	Dlg1, Slit2, Calb1, Spry1, Fgfr1, Fgfr2, Maged1, Zbtb16, Npnt, Fmn1, Bmper, Eya1, Sfrp1, Vegfa, Myc, Tshz3, Wt1, Bmp2, Vcan
GO:0001558	8.09e-06	5.09	0.999996	48	306	regulation of cell growth	BP	Ctgf, Tgfb2, Slit2, Efna5, Rasal1, Plxna1, Syt17, Kif26a, Ptk2b, Nme6, Rtn4r, Sgk1, Syt4, Igfbp4, Smarca2, Serpine2, Foxp1, Trpc5, Ntn1, Pak1, Hrasls, Cdk5r1, Ptprj, Sema3a, Pttg1, Twf2, Mgll, Sema5a, Gas1, Sgk3, Psrc1, Sfrp1, Epha7, Rims2, Rgma, Avpr1a, Bcl6, Slit3, Vegfa, Nr3c1, Tnr, Sh3bp4, Nov, Syt1, Pparg, Inhba, Wt1, Fgf13
GO:0045933	8.84e-06	5.05	0.999999	11	29	positive regulation of muscle contraction	BP	Ctgf, F2r, Ptger3, Chrm3, Tacr3, Npy2r, Smtn, Npnt, Kit, Oxtr, Adra1a
GO:0046873	8.95e-06	5.05	0.999996	51	298	metal ion transmembrane transporter activity	MF	Kcnf1, Scn1a, Slc4a7, Hcn1, Trpc6, Slc24a4, Rasa3, Kcnab1, Cacna1i, Kcng1, Atp2b2, Trpv6, Trpc5, Cacna1e, Cacna1h, Itgav, Atp2a2, Slc30a3, Slc4a4, Grin3a, Hrh1, Grik3, Scn3b, Slc6a6, Kcnn2, Atp1b1, Mcu, Cacna2d3, Slc20a1, Kcnip2, Kcns3, Grin2a, Kcnk13, Cnga4, Trpc4, Atp2b1, Kcnh3, Il1rapl1, Grm7, Ryr3, Kcnq5, Kcnd2, Asic2, Kcnh5, Kcnj2, Kcnip4, Kcnh1, Slc24a2, Kcng3, Kcnk9, Grik2
GO:0007611	9.21e-06	5.04	0.999996	40	215	learning or memory	BP	Brinp1, Adcy8, Sorcs3, Calb1, Htr2a, Kcnab1, Sgk1, Syt4, Nts, Neto1, Gria1, Cacna1e, Cux2, Pak1, Reln, Hrh1, Foxo6, Grm4, Ptn, Cntnap2, Camk4, Htr7, Adcy1, Ntrk2, Mef2c, Chrna7, Plcb1, Kit, Oxtr, Gatm, Grin2a, Grm5, Grm7, Plk2, Tnr, Gabra5, Slc24a2, Crhr1, Fgf13, Foxp2
GO:0005244	9.6e-06	5.02	0.999997	30	144	voltage-gated ion channel activity	MF	Kcnf1, Scn1a, Hcn1, Ptk2b, Kcnab1, Cacna1i, Kcng1, Cacna1e, Cacna1h, Itgav, Grin3a, Scn3b, Cacna2d3, Kcnip2, Kcns3, Grin2a, Kcnk13, Cnga4, Kcnh3, Il1rapl1, Grm7, Kcnq5, Kcnd2, Asic2, Kcnh5, Kcnj2, Kcnip4, Kcnh1, Kcng3, Kcnk9
GO:0022832	9.6e-06	5.02	0.999997	30	144	voltage-gated channel activity	MF	Kcnf1, Scn1a, Hcn1, Ptk2b, Kcnab1, Cacna1i, Kcng1, Cacna1e, Cacna1h, Itgav, Grin3a, Scn3b, Cacna2d3, Kcnip2, Kcns3, Grin2a, Kcnk13, Cnga4, Kcnh3, Il1rapl1, Grm7, Kcnq5, Kcnd2, Asic2, Kcnh5, Kcnj2, Kcnip4, Kcnh1, Kcng3, Kcnk9
GO:0003015	9.67e-06	5.01	0.999997	29	142	heart process	BP	Ctgf, Tgfb2, Scn1a, Pde4d, Dlg1, Thrb, Tacr3, Cav1, Pik3r1, Cacna1e, Atp2a2, Sema3a, Met, Scn3b, Smtn, Rps6ka2, Adora1, Kcnn2, Atp1b1, Chrna7, Camk2d, Avpr1a, Adra1a, Ramp3, Pkp2, Gpx1, Hey2, Chrm2, Kcnj2
GO:0090066	1.01e-05	5	0.999995	58	376	regulation of anatomical structure size	BP	F2r, Dlg1, Ptger3, Slit2, Npy1r, Efna5, Htr2a, Chrm3, Prkg2, Cav1, Plxna1, Ptk2b, Prex1, Atp2b2, Rtn4r, Swap70, Nts, Trpc5, Ntn1, Pak1, Gsn, Akt3, Cdk5r1, Hrh1, Sema3a, Chrm1, Pik3r2, Twf2, Mgll, Prkcd, Sema5a, Wasf1, Htr7, Prkce, Arfgef1, Spire1, Adora1, Ahr, Cdc42ep3, Oxtr, Fmn1, Epha7, Rgma, Avpr1a, Vegfa, Tnr, Htr2c, Pls1, Adra1a, Iqgap2, Gpx1, Asic2, Coro1a, Wnt7b, Htr1b, Htr1a, Fgf13, Prr16
GO:0042127	1.05e-05	4.98	0.999994	122	1023	regulation of cell proliferation	BP	Ctgf, Fosl2, F2r, Grk5, Trib1, Cited2, Tgfb2, Gcnt2, Dlg1, Dlc1, Thrb, Pmaip1, Slit2, Sstr2, Tes, Spry1, Cckbr, Htr2a, Fgf10, Tnn, Sstr1, Acvr1c, Tal1, Cav1, Pik3r1, Ptk2b, Nr3c2, Ptpru, Mycn, Ndrg1, Fgfr1, Fgfr2, Egr3, Efnb1, Mcc, Smarca2, Serpine2, Foxp1, Sulf2, Pmp22, Ctnna1, Trpc5, Itgav, Bok, Ntn1, Pds5b, Pak1, Itgb3, Marcksl1, Cdk6, Tsc22d1, Ptprj, Phip, Ptprf, Traf6, Glul, Ptn, Pttg1, Il4r…
GO:0008146	1.06e-05	4.97	0.999999	11	29	sulfotransferase activity	MF	Hs3st1, Sult2b1, Chst15, Ndst3, Hs3st5, Hs6st1, Chst1, Wscd1, Hs6st2, Chst2, Hs6st3
GO:0009719	1.06e-05	4.97	0.999994	110	860	response to endogenous stimulus	BP	Ctgf, Sik1, Cited2, Bmp3, Tgfb2, Pde4d, Gcnt2, Dusp6, Thrb, Hcn1, Slit2, Sstr2, Spry1, Gpr22, Efna5, Fgf10, Trim16, Hcrtr2, Acvr1c, Rorb, Cav1, Parp1, Cad, Pde2a, Pik3r1, Nr3c2, Epha8, Fgfr1, Fgfr2, Egr3, Shisa2, Sgk1, Sulf2, Ctnna1, Inpp5k, Atp2a2, Rora, Pak1, Itgb3, Akt3, Phip, Ptprf, Hrh1, Pik3r2, Nlk, Paqr7, Prkcd, Grb14, Apc, Rgmb, Wasf1, Bambi, Cdh13, Acvr2a, Zfp423, Inhbb, Htr7, Rab31, Arn…
GO:0061564	1.07e-05	4.97	0.999995	61	384	axon development	BP	Tgfb2, Slit2, Slitrk4, Efna5, Tnn, Matn2, Plxna1, Unc5b, Epha8, Rtn4r, Fgfr2, Nptx1, Efnb1, Rtn4rl1, Ephb3, Foxp1, Trpc5, Dcc, Ntn1, Pak1, Reln, Cdk5r1, Ptprf, Sema3a, Xylt1, Twf2, Mgll, Apc, Sema5a, B3gnt2, Adcy1, Ntrk2, Slitrk5, Lmtk2, Gas1, Chn1, Cdh11, Flrt3, Unc5d, Vim, Crtac1, Epha7, Rgma, Ntng2, Cntn4, Alcam, Slit3, Dab1, Unc5c, Etv1, Vegfa, Tnr, Ephb1, Ntng1, Sema6a, Lrrc4c, Wnt7b, Fgf13,…
GO:0051050	1.07e-05	4.97	0.999994	91	701	positive regulation of transport	BP	F2r, Gpr26, Lipg, Tgfb2, Dlg1, Rbpms, Hcn1, Pmaip1, Rasgrp1, Trpc6, Cckbr, Trim16, Myrip, Cav1, Parp1, Pik3r1, Cemip, Cacna1i, Atp2b2, Sirpa, Fgfr1, Sgk1, Syt4, Sulf2, Cacna1h, Eda, Inpp5k, Bok, Mfge8, Slc30a3, Npy2r, Pak1, Akt3, Reln, Cdk5r1, Eef2k, Cadm1, B2m, Hip1, Nell2, Chrm1, Pik3r2, Glul, Met, Scn3b, Il4ra, Prkcd, Camk4, Sema5a, Angpt1, Bambi, Acvr2a, Inhbb, Sdc1, Clu, Prkce, Acsl5, Adora1…
GO:0042327	1.1e-05	4.96	0.999994	86	648	positive regulation of phosphorylation	BP	Ctgf, F2r, Bmp3, Tgfb2, Gcnt2, Dlg1, Rbpms, Ptger3, Rasgrp1, Trpc6, Efna5, Htr2a, Fgf10, Cav1, Pik3r1, Ptk2b, Cemip, Fzd8, Epha8, Fgfr1, Fgfr2, Peli2, Igfbp4, Trpc5, Dcc, Itgav, Pak1, Itgb3, Pik3r5, Reln, Cdk5r1, Phip, Traf6, Grm4, Met, Sema4c, Prkcd, Hsph1, Angpt1, Chrna3, Maged1, Rap2a, Acvr2a, Inhbb, Ntrk2, Gprc5b, Tnfrsf19, Clu, Prkce, Tgfa, Adora1, Lrrn3, Sstr4, Ksr1, Sash1, Chrna7, Psrc1, N…
GO:0072001	1.11e-05	4.95	0.999996	38	198	renal system development	BP	C1galt1, Tiparp, Tgfb2, Dlg1, Slit2, Calb1, Spry1, Fgf10, Fgfr1, Fgfr2, Sulf2, Itgb3, Cdkn1c, Schip1, Apc, Angpt1, Maged1, Bcl2l11, Mef2c, Zbtb16, Id2, Ahr, Npnt, Prom1, Fmn1, Bmper, Eya1, Sfrp1, Epha7, Plce1, Itgb4, Vegfa, Myc, Tshz3, Wt1, Wnt7b, Bmp2, Vcan
GO:0050918	1.14e-05	4.94	0.999999	11	28	positive chemotaxis	BP	Fgf10, Ptprj, Met, Sema5a, Angpt1, Cdh13, S1pr1, Vegfa, Coro1a, Wnt7b, Ntf3
GO:0022604	1.18e-05	4.93	0.999994	62	394	regulation of cell morphogenesis	BP	Dlg1, Dlc1, Slit2, Trpc6, Efna5, Rasal1, Plxna1, Syt17, Ptk2b, Prex1, Rtn4r, Net1, Sgk1, Syt4, Ephb3, Ptprd, Trpc5, Ntn1, S100a10, Cux2, Pak1, Itgb3, Reln, Cdk5r1, Eef2k, Phip, Ptprf, Sema3a, Ptn, Met, Twf2, Mgll, Sema5a, Strip2, Bambi, Chrna3, Rap2a, Coch, Ntrk2, Chn1, Cdc42ep3, Nlgn1, Kit, Vim, Shroom3, Sh3d19, Epha7, Rims2, Rgma, Ngef, Il1rapl1, Dab1, Nsmf, Vegfa, Rhou, Tnr, Syt1, Lrrc4c, Coro…
GO:0040012	1.19e-05	4.92	0.999994	82	581	regulation of locomotion	BP	F2r, Trib1, Cited2, Tgfb2, Chrm4, Gcnt2, Dlc1, Ptger3, Slit2, Fgf10, Acvr1c, Acan, Tacr3, Plxna1, Pik3r1, Ptk2b, Ptpru, Cemip, Prex1, Ccbe1, Swap70, Fgfr1, Mcc, Ctnna1, Itgav, Ntn1, Pak1, Gsn, Itgb3, Reln, Ptprj, Sema3a, Chrm1, Ptn, Met, Apc, Sema5a, Angpt1, Cdh13, Amotl1, Rap2a, S1pr1, Prkce, Adora1, Pcx, Mpp1, Sash1, Ldlrad4, Plcb1, Kit, Phldb2, Unc5d, Lmo4, Vim, Bmper, Camk2d, Sfrp1, Grm5, Prk…
GO:0009967	1.19e-05	4.92	0.999993	114	926	positive regulation of signal transduction	BP	Ctgf, F2r, Cited2, Bmp3, Tgfb2, Gcnt2, Rbpms, Pmaip1, Rasgrp1, Htr2a, Fgf10, Trim16, Klf14, Cav1, Unc5b, Parp1, Pik3r1, Ptk2b, Fzd8, Rspo2, Ccbe1, Aldh1a3, Epha8, Rtn4r, Fgfr1, Fgfr2, Peli2, Igfbp4, Neto1, Sulf2, Ctnna1, Scube1, Dcc, Eda, Itgav, Bok, Cux2, Pak1, Timp3, Gsn, Itgb3, Pik3r5, Akt3, Reln, Ptprj, Hip1, Phip, Traf6, Grm4, Met, Sema4c, Prkcd, Sema5a, Angpt1, Wasf1, Bambi, Maged1, Cdh13, …
GO:0006940	1.22e-05	4.91	0.999998	14	44	regulation of smooth muscle contraction	BP	F2r, Ptger3, Chrm3, Tacr3, Cav1, Npy2r, Chrm1, Chrna3, Adora1, Npnt, Kit, Oxtr, Adra1a, Chrm2
GO:0071310	1.23e-05	4.91	0.999992	157	1354	cellular response to organic substance	BP	Ctgf, Brinp3, Trib1, Sik1, Tiparp, Cited2, Brinp1, Bmp3, Tgfb2, Pde4d, Gcnt2, Dusp6, Thrb, Ptger3, Hcn1, Slit2, Calb1, Sstr2, Slc16a1, Spry1, Gpr22, Efna5, Fgf10, Hcrtr2, Sstr1, Acvr1c, Rorb, Cav1, Parp1, Pde2a, Pik3r1, Ptk2b, Nr3c2, Ccbe1, Epha8, Rtn4r, Fgfr1, Fgfr2, Egr3, Shisa2, Sgk1, Rtn4rl1, Foxp1, Sulf2, Ctnna1, Cacna1e, Inpp5k, Bok, Rora, Ackr1, Cux2, Pak1, Timp3, Itgb3, Cdk6, Akt3, Msc, S…
GO:0070374	1.24e-05	4.91	0.999996	23	109	positive regulation of ERK1 and ERK2 cascade	BP	Ctgf, F2r, Gcnt2, Rasgrp1, Htr2a, Fgf10, Ptk2b, Fgfr2, Dcc, Itgb3, Angpt1, Chrna7, Npnt, Bmper, Camk2d, Tnfrsf11a, Vegfa, Htr2c, Adra1a, Ramp3, Pdgfc, Fbxw7, Bmp2
GO:0120036	1.25e-05	4.9	0.999992	142	1163	plasma membrane bounded cell projection organization	BP	Klhl1, Tgfb2, Chodl, Slit2, Trpc6, Slitrk4, Efna5, Tnn, Rasal1, Cav1, Matn2, Plxna1, Unc5b, Syt17, Ptk2b, Prex1, Atp2b2, Efhd1, Epha8, Rtn4r, Fgfr1, Fgfr2, Nptx1, Efnb1, Sgk1, Syt4, Rtn4rl1, Ephb3, Serpine2, Foxp1, Ptprd, Pmp22, Trpc5, Dcc, Igsf9, Inpp5k, Mkl2, Prickle2, Ntn1, Cux2, Pak1, Gsn, Csmd3, Reln, Cdk5r1, Eef2k, Grin3a, B2m, Ptprf, Sema3a, Xylt1, Foxo6, Ptn, Cntnap2, Met, Asap1, Twf2, Ar…
GO:0042310	1.32e-05	4.88	0.999997	17	60	vasoconstriction	BP	F2r, Ptger3, Npy1r, Htr2a, Chrm3, Cav1, Hrh1, Chrm1, Htr7, Ahr, Oxtr, Avpr1a, Htr2c, Adra1a, Asic2, Htr1b, Htr1a
GO:0010562	1.35e-05	4.87	0.999993	93	722	positive regulation of phosphorus metabolic process	BP	Ctgf, F2r, Bmp3, Tgfb2, Gcnt2, Dlg1, Dlc1, Rbpms, Ptger3, Rasgrp1, Trpc6, Efna5, Htr2a, Fgf10, Cav1, Pik3r1, Ptk2b, Cemip, Fzd8, Epha8, Fgfr1, Fgfr2, Peli2, Igfbp4, Trpc5, Dcc, Itgav, Pak1, Itgb3, Pik3r5, Reln, Cdk5r1, Phip, Traf6, Grm4, Met, Sema4c, Prkcd, Hsph1, Adcy2, Angpt1, Chrna3, Maged1, Rap2a, Acvr2a, Inhbb, Adcy1, Ntrk2, Gprc5b, Mef2c, Tnfrsf19, Clu, Prkce, Tgfa, Adora1, Lrrn3, Sstr4, Pc…
GO:0045937	1.35e-05	4.87	0.999993	93	722	positive regulation of phosphate metabolic process	BP	Ctgf, F2r, Bmp3, Tgfb2, Gcnt2, Dlg1, Dlc1, Rbpms, Ptger3, Rasgrp1, Trpc6, Efna5, Htr2a, Fgf10, Cav1, Pik3r1, Ptk2b, Cemip, Fzd8, Epha8, Fgfr1, Fgfr2, Peli2, Igfbp4, Trpc5, Dcc, Itgav, Pak1, Itgb3, Pik3r5, Reln, Cdk5r1, Phip, Traf6, Grm4, Met, Sema4c, Prkcd, Hsph1, Adcy2, Angpt1, Chrna3, Maged1, Rap2a, Acvr2a, Inhbb, Adcy1, Ntrk2, Gprc5b, Mef2c, Tnfrsf19, Clu, Prkce, Tgfa, Adora1, Lrrn3, Sstr4, Pc…
GO:0070588	1.39e-05	4.86	0.999995	33	177	calcium ion transmembrane transport	BP	F2r, Stac, Tgfb2, Pde4d, Ptger3, Trpc6, Htr2a, Ptk2b, Cemip, Atp2b2, Trpv6, Trpc5, Cacna1e, Cacna1h, Itgav, Atp2a2, Itgb3, Micu1, Prkce, Atp1b1, Mcu, Cacna2d3, Camk2d, Grin2a, Trpc4, Atp2b1, Prkd1, Ryr3, Htr2c, Ramp3, Coro1a, Slc24a2, Crhr1
GO:0008016	1.44e-05	4.84	0.999995	25	114	regulation of heart contraction	BP	Ctgf, Tgfb2, Pde4d, Dlg1, Thrb, Tacr3, Cav1, Pik3r1, Cacna1e, Gjc1, Atp2a2, Sema3a, Scn3b, Smtn, Adora1, Kcnn2, Atp1b1, Chrna7, Avpr1a, Adra1a, Pkp2, Hey2, Chrm2, Kcnj2, Fgf13
GO:0060401	1.51e-05	4.82	0.999995	24	109	cytosolic calcium ion transport	BP	Ctgf, F2r, Tgfb2, Pde4d, Htr2a, Cav1, Ptk2b, Cemip, Cacna1i, Trpv6, Itgav, Atp2a2, Itgb3, Micu1, Prkce, Mcu, Camk2d, Grin2a, Prkd1, Ryr3, Htr2c, Adra1a, Ramp3, Coro1a
GO:0040008	1.52e-05	4.82	0.999992	69	499	regulation of growth	BP	Ctgf, Cited2, Nedd9, Tgfb2, Dlg1, Dusp6, Slit2, Npy1r, Efna5, Rasal1, Plxna1, Parp1, Syt17, Kif26a, Ptk2b, Nme6, Cspg5, Rtn4r, Fgfr1, Fgfr2, Sgk1, Syt4, Igfbp4, Smarca2, Serpine2, Foxp1, Trpc5, Ntn1, Pak1, Hrasls, Cdk5r1, Ptprj, Phip, Nell2, Sema3a, Pttg1, Twf2, Mgll, Sema5a, Enox2, Bcl2l11, Mef2c, Jarid2, Gas1, Sgk3, Psrc1, Ahr, Ybx3, Plcb1, Sfrp1, Epha7, Rims2, Rgma, Avpr1a, Bcl6, Slit3, Vegfa,…
GO:0006468	1.59e-05	4.8	0.99999	149	1264	protein phosphorylation	BP	Ctgf, F2r, Grk5, Trib1, Sik1, Bmp3, Tgfb2, Pde4d, Gcnt2, Dlg1, Hunk, Dusp6, Rbpms, Ptger3, Slit2, Rasgrp1, Trpc6, Spry1, Cckbr, Efna5, Dusp4, Htr2a, Pkib, Fgf10, Prkg2, Acvr1c, Cav1, Cad, Dusp7, Pik3r1, Ptk2b, Cemip, Fzd8, Prex1, Dok4, Epha8, Rtn4r, Fgfr1, Fgfr2, Peli2, Sgk1, Rtn4rl1, Ephb3, Igfbp4, Trpc5, Dcc, Itgav, Inpp5k, Prkacb, Pak1, Timp3, Prkd3, Itgb3, Cdk19, Cdk6, Pik3r5, Akt3, Reln, Cdk…
GO:0051241	1.67e-05	4.78	0.99999	95	746	negative regulation of multicellular organismal process	BP	F2r, Trib1, Cited2, Brinp1, Tgfb2, Pde4d, Ptger3, Slit2, Trpc6, Ism1, Tnn, Acvr1c, Rorb, Cav1, Parp1, Pik3r1, Ptk2b, Rspo2, Mycn, Rtn4r, Fgfr1, Mcc, Syt4, Rtn4rl1, Hs3st5, Serpine2, Foxp1, Pmp22, Ctnna1, Trpc5, Prickle1, Ntn1, Atp2a2, Npy2r, Prkacb, Pak1, Cdk6, Cdk5r1, B2m, Sema3a, Xylt1, Ptn, Met, Asap1, Il4ra, Ovol2, Prkcd, Grb14, Apc, Sema5a, Angpt1, Inhbb, Htr7, Ascl1, Mef2c, Jarid2, Laptm4b,…
GO:0048518	1.68e-05	4.77	0.999988	373	3805	positive regulation of biological process	BP	Ctgf, Fosl2, F2r, Brinp3, Grk5, Trib1, Maml3, Tiparp, Cited2, Brinp1, Bmp3, Gpr26, Pou3f1, Lipg, Tpbg, Tgfb2, Ets2, Abcd2, Gcnt2, Dlg1, Itgb8, Dusp6, Dlc1, Rbpms, Thrb, Ptger3, Hcn1, Pmaip1, Slit2, Rasgrp1, Trpc6, Calb1, Npy1r, Spry1, Slitrk4, Cckbr, Efna5, Htr2a, Pkib, Fgf10, Chrm3, Trim16, Acvr1c, Rorb, Tacr3, Klf14, Cldn1, Rasal1, Tal1, Myrip, Cav1, Unc5b, Parp1, Syt17, Pde2a, Pik3r1, Ptk2b, C…
GO:0007605	1.73e-05	4.76	0.999995	21	87	sensory perception of sound	BP	Pgap1, Thrb, Cemip, Tmie, Atp2b2, Fgfr1, Sobp, Otof, Coch, Whrn, Gabrb3, Kit, Grm7, Cntn5, Gabra5, Myc, Gpx1, Asic2, Pou3f4, Pcdh15, Crym
GO:0007409	1.74e-05	4.76	0.999992	57	355	axonogenesis	BP	Tgfb2, Slit2, Slitrk4, Efna5, Tnn, Matn2, Plxna1, Unc5b, Epha8, Rtn4r, Fgfr2, Nptx1, Efnb1, Ephb3, Foxp1, Trpc5, Dcc, Ntn1, Pak1, Reln, Cdk5r1, Sema3a, Twf2, Mgll, Apc, Sema5a, B3gnt2, Adcy1, Ntrk2, Slitrk5, Lmtk2, Gas1, Chn1, Cdh11, Flrt3, Unc5d, Vim, Epha7, Rgma, Ntng2, Cntn4, Alcam, Slit3, Dab1, Unc5c, Etv1, Vegfa, Tnr, Ephb1, Ntng1, Sema6a, Lrrc4c, Wnt7b, Fgf13, Flrt2, Plxnd1, Ntf3
GO:0051093	1.75e-05	4.76	0.99999	87	663	negative regulation of developmental process	BP	Trib1, Cited2, Brinp1, Tgfb2, Ptger3, Slit2, Trpc6, Efna5, Ism1, Fgf10, Tnn, Acvr1c, Rorb, Cav1, Pik3r1, Ptk2b, Rspo2, Mycn, Rtn4r, Fgfr1, Syt4, Rtn4rl1, Foxp1, Pmp22, Ctnna1, Trpc5, Itgav, Prickle1, Ntn1, Rora, Prkacb, Pak1, Itgb3, Cdk6, Cdk5r1, B2m, Sema3a, Xylt1, Ptn, Asap1, Il4ra, Ovol2, Grb14, Apc, Sema5a, Arntl, Ascl1, Jarid2, Zbtb16, Id2, Ybx3, Mdga1, Ldlrad4, Nlgn1, Ntm, Phldb2, Vim, Tjp2…
GO:0060047	1.78e-05	4.75	0.999994	28	139	heart contraction	BP	Ctgf, Tgfb2, Scn1a, Pde4d, Dlg1, Thrb, Tacr3, Cav1, Pik3r1, Cacna1e, Atp2a2, Sema3a, Met, Scn3b, Smtn, Rps6ka2, Adora1, Kcnn2, Atp1b1, Chrna7, Camk2d, Avpr1a, Adra1a, Pkp2, Gpx1, Hey2, Chrm2, Kcnj2
GO:0071495	1.86e-05	4.73	0.999989	101	772	cellular response to endogenous stimulus	BP	Ctgf, Sik1, Cited2, Bmp3, Tgfb2, Pde4d, Gcnt2, Dusp6, Thrb, Hcn1, Slit2, Sstr2, Spry1, Gpr22, Efna5, Fgf10, Hcrtr2, Acvr1c, Rorb, Cav1, Parp1, Pde2a, Pik3r1, Nr3c2, Epha8, Fgfr1, Fgfr2, Egr3, Shisa2, Sgk1, Sulf2, Ctnna1, Inpp5k, Rora, Pak1, Itgb3, Akt3, Phip, Ptprf, Hrh1, Pik3r2, Nlk, Prkcd, Grb14, Apc, Rgmb, Wasf1, Bambi, Acvr2a, Zfp423, Inhbb, Rab31, Arntl, Ntrk2, Glra2, Pde3a, Mef2c, Prkce, Ss…
GO:0019229	1.9e-05	4.72	0.999996	14	44	regulation of vasoconstriction	BP	F2r, Ptger3, Npy1r, Htr2a, Chrm3, Cav1, Hrh1, Chrm1, Ahr, Oxtr, Avpr1a, Htr2c, Adra1a, Asic2
GO:0023061	1.91e-05	4.72	0.999991	50	315	signal release	BP	Ptger3, Slc16a1, Npy1r, Cckbr, Efna5, Htr2a, Acvr1c, Myrip, Syt17, Lin7b, Fgfr1, Syt4, Nrxn3, Trpv6, Cacna1e, Atp2a2, Pak1, Nell2, Glul, Otof, Chrna3, Acvr2a, Inhbb, Arntl, Ntrk2, Mef2c, Prkce, Adora1, Mcu, Sptbn2, Pim3, Nlgn1, Stxbp5l, Sfrp1, Rfx3, Rims2, Nnat, Vsnl1, Htr2c, Nov, Cadps2, Syt1, Pparg, Inhba, Pex5l, Grm8, Ildr2, Crhr1, Htr1a, Nr1d1
GO:0055080	1.95e-05	4.71	0.99999	62	438	cation homeostasis	BP	F2r, Tmtc2, Tgfb2, Pde4d, Slc4a7, Ptger3, Trpc6, Calb1, Slc24a4, Npy1r, Cckbr, Htr2a, Hcrtr2, Cav1, Ptk2b, Nr3c2, Cemip, Cacna1i, Trhr, Atp2b2, Swap70, Sgk1, Gpr6, Trpv6, Trpc5, Itgav, Bok, Atp2a2, Slc30a3, Slc4a4, Npy2r, Itgb3, B2m, Letmd1, Micu1, Sfxn5, S1pr1, Prkce, Adora1, Atp1b1, Mcu, Cib2, Chrna7, Mt1, Oxtr, Mchr1, Camk2d, Grin2a, Avpr1a, Trpc4, Atp2b1, Prkd1, Ryr3, Calb2, Htr2c, Myc, Adra1…
GO:0098771	2.02e-05	4.69	0.99999	63	448	inorganic ion homeostasis	BP	F2r, Tmtc2, Tgfb2, Pde4d, Slc4a7, Ptger3, Trpc6, Calb1, Slc24a4, Npy1r, Cckbr, Htr2a, Hcrtr2, Cav1, Ptk2b, Nr3c2, Cemip, Cacna1i, Trhr, Atp2b2, Swap70, Sgk1, Gpr6, Trpv6, Trpc5, Itgav, Bok, Atp2a2, Slc30a3, Slc4a4, Npy2r, Xpr1, Itgb3, B2m, Letmd1, Micu1, Sfxn5, S1pr1, Prkce, Adora1, Atp1b1, Mcu, Cib2, Chrna7, Mt1, Oxtr, Mchr1, Camk2d, Grin2a, Avpr1a, Trpc4, Atp2b1, Prkd1, Ryr3, Calb2, Htr2c, Myc,…
GO:0043405	2.03e-05	4.69	0.999992	37	209	regulation of MAP kinase activity	BP	F2r, Trib1, Dusp6, Rasgrp1, Spry1, Dusp4, Htr2a, Fgf10, Cav1, Dusp7, Ptk2b, Fzd8, Fgfr1, Inpp5k, Pak1, Pik3r5, Ptprj, Traf6, Grm4, Met, Prkcd, Maged1, Tgfa, Adora1, Sash1, Chrna7, Kit, Sfrp1, Magi3, Grm5, Plce1, Tnfrsf11a, Vegfa, Pdgfc, Wnt7b, Bmp2, Ntf3
GO:0030155	2.05e-05	4.69	0.99999	61	410	regulation of cell adhesion	BP	Cited2, Tgfb2, Gcnt2, Dlg1, Dlc1, Ptger3, Rasgrp1, Efna5, Cav1, Pik3r1, Ptk2b, Prex1, Epha8, Swap70, Net1, Egr3, Efnb1, Ephb3, Serpine2, Jam2, Itgav, S100a10, Npy2r, Gsn, Itgb3, Cdk6, Ptprj, Traf6, Pik3r2, Ptn, Il4ra, Prkcd, Hsph1, Apc, Sema5a, Angpt1, Cdh13, Ajap1, S1pr1, Prkce, Cblb, Zbtb16, Ephb6, Npnt, Phldb2, Col26a1, Fmn1, Utrn, Epha7, Bcl6, Dab1, Vegfa, Edil3, Tnr, Fzd7, Coro1a, Onecut2, S…
GO:0090257	2.08e-05	4.68	0.999992	31	159	regulation of muscle system process	BP	Ctgf, F2r, Pde4d, Dlg1, Ptger3, Sstr2, Chrm3, Tacr3, Cav1, Parp1, Foxp1, Atp2a2, Npy2r, Pak1, Chrm1, Smtn, Chrna3, Mef2c, Jarid2, Adora1, Atp1b1, Npnt, Kit, Oxtr, Camk2d, Nr3c1, Adra1a, Pkp2, Chrm2, Kcnj2, Fgf13
GO:0030030	2.11e-05	4.68	0.999987	143	1187	cell projection organization	BP	Klhl1, Tgfb2, Chodl, Slit2, Trpc6, Slitrk4, Efna5, Tnn, Rasal1, Cav1, Matn2, Plxna1, Unc5b, Syt17, Ptk2b, Prex1, Atp2b2, Efhd1, Epha8, Rtn4r, Fgfr1, Fgfr2, Nptx1, Efnb1, Sgk1, Syt4, Rtn4rl1, Ephb3, Serpine2, Foxp1, Ptprd, Pmp22, Trpc5, Dcc, Igsf9, Inpp5k, Mkl2, Prickle2, Ntn1, Cux2, Pak1, Gsn, Itgb3, Csmd3, Reln, Cdk5r1, Eef2k, Grin3a, B2m, Ptprf, Sema3a, Xylt1, Foxo6, Ptn, Cntnap2, Met, Asap1, T…
GO:0006816	2.12e-05	4.67	0.999991	43	262	calcium ion transport	BP	Ctgf, F2r, Stac, Tgfb2, Pde4d, Ptger3, Trpc6, Slc24a4, Htr2a, Cav1, Ptk2b, Cemip, Cacna1i, Atp2b2, Trpv6, Trpc5, Cacna1e, Cacna1h, Itgav, Inpp5k, Atp2a2, Itgb3, Grin3a, Hrh1, Micu1, Prkce, Atp1b1, Mcu, Chrna7, Cacna2d3, Mchr1, Camk2d, Grin2a, Trpc4, Atp2b1, Prkd1, Ryr3, Htr2c, Adra1a, Ramp3, Coro1a, Slc24a2, Crhr1
GO:0055082	2.16e-05	4.67	0.999989	67	486	cellular chemical homeostasis	BP	F2r, Tgfb2, Pde4d, Slc4a7, Ptger3, Trpc6, Calb1, Slc24a4, Npy1r, Cckbr, Efna5, Htr2a, Hcrtr2, Cav1, Pik3r1, Ptk2b, Nr3c2, Cemip, Cacna1i, Trhr, Atp2b2, Swap70, Sgk1, Gpr6, Trpv6, Trpc5, Cacna1e, Itgav, Bok, Atp2a2, Slc30a3, Slc4a4, Npy2r, Xpr1, Itgb3, Pik3r2, Letmd1, Micu1, S1pr1, Prkce, Atp1b1, Mcu, Cib2, Chrna7, Mt1, Pim3, Oxtr, Mchr1, Camk2d, Grin2a, Avpr1a, Trpc4, Atp2b1, Prkd1, Vsnl1, Ryr3, …
GO:0001657	2.16e-05	4.67	0.999995	18	68	ureteric bud development	BP	Dlg1, Slit2, Calb1, Spry1, Fgfr1, Fgfr2, Maged1, Npnt, Fmn1, Bmper, Eya1, Sfrp1, Vegfa, Myc, Tshz3, Wt1, Bmp2, Vcan
GO:0072163	2.16e-05	4.67	0.999995	18	68	mesonephric epithelium development	BP	Dlg1, Slit2, Calb1, Spry1, Fgfr1, Fgfr2, Maged1, Npnt, Fmn1, Bmper, Eya1, Sfrp1, Vegfa, Myc, Tshz3, Wt1, Bmp2, Vcan
GO:0072164	2.16e-05	4.67	0.999995	18	68	mesonephric tubule development	BP	Dlg1, Slit2, Calb1, Spry1, Fgfr1, Fgfr2, Maged1, Npnt, Fmn1, Bmper, Eya1, Sfrp1, Vegfa, Myc, Tshz3, Wt1, Bmp2, Vcan
GO:0030431	2.17e-05	4.66	0.999998	9	22	sleep	BP	Ptger3, Htr2a, Hcrtr2, Cacna1i, Npy2r, Htr7, Adora1, Oxtr, Grin2a
GO:0045987	2.2e-05	4.66	0.999998	9	21	positive regulation of smooth muscle contraction	BP	F2r, Ptger3, Chrm3, Tacr3, Npy2r, Npnt, Kit, Oxtr, Adra1a
GO:0035295	2.21e-05	4.66	0.999988	69	459	tube development	BP	Ctgf, C1galt1, Cited2, Tgfb2, Dlg1, Dlc1, Thrb, Slit2, Calb1, Spry1, Cckbr, Fgf10, Rspo2, Ccbe1, Mycn, Sall2, Fgfr1, Fgfr2, Ephb3, Serpine2, Foxp1, Eda, Prickle1, Ntn1, Prkacb, Pak1, Itpk1, Traf6, Met, Heg1, Sema4c, Ovol2, Sema5a, Angpt1, Maged1, Bcl2l11, Ascl1, Mef2c, Hs6st1, Gas1, Id2, Ahr, Npnt, Kit, Man2a1, Lmo4, Prom1, Fmn1, Gpsm2, Shroom3, Bmper, Eya1, Sfrp1, Epha7, Rgma, Itgb4, Vegfa, Nr3c…
GO:1904062	2.23e-05	4.65	0.999991	36	211	regulation of cation transmembrane transport	BP	F2r, Stac, Tgfb2, Pde4d, Dlg1, Ptger3, Hcn1, Cav1, Shisa9, Ptk2b, Cemip, Kcnab1, Kcng1, Neto1, Itgb3, Reln, B2m, Scn3b, Mef2c, Prkce, Atp1b1, Dpp10, Plcb1, Nlgn1, Kcnip2, Neto2, Rasgrf1, Camk2d, Prkd1, Rasgrf2, Ramp3, Asic2, Coro1a, Kcnj2, Kcnip4, Crhr1
GO:0008324	2.3e-05	4.64	0.999988	61	428	cation transmembrane transporter activity	MF	Kcnf1, Scn1a, Slc4a7, Hcn1, Trpc6, Slc24a4, Rasa3, Ptk2b, Kcnab1, Cacna1i, Kcng1, Atp2b2, Trpv6, Gria1, Trpc5, Cacna1e, Cacna1h, Itgav, Atp2a2, Slc30a3, Slc4a4, Slc22a3, Grin3a, Hrh1, Grik3, Scn3b, Serinc2, Chrna3, Gria4, Piezo2, Slc6a6, Kcnn2, Atp1b1, Mcu, Chrna7, Cacna2d3, Slc20a1, Kcnip2, Kcns3, Grin2a, Kcnk13, Cnga4, Trpc4, Gria3, Atp2b1, Kcnh3, Il1rapl1, Grm7, Ryr3, Kcnq5, Kcnd2, Asic2, Pex5…
GO:0051046	2.34e-05	4.63	0.999988	70	502	regulation of secretion	BP	F2r, Tgfb2, Ptger3, Rab3c, Rasgrp1, Slc16a1, Npy1r, Cckbr, Efna5, Htr2a, Fgf10, Trim16, Acvr1c, Myrip, Parp1, Syt17, Cacna1i, Fgfr1, Syt4, Cacna1e, Cacna1h, Atp2a2, Npy2r, Cadm1, Nell2, Traf6, Glul, Il4ra, Angpt1, Chrna3, Acvr2a, Inhbb, Htr7, Arntl, Ntrk2, Sdc1, Mef2c, Prkce, Adora1, Mcu, Chrna7, Pim3, Nlgn1, Oxtr, Stxbp5l, Sfrp1, Rfx3, Rims2, Avpr1a, Nnat, Il1rapl1, Tnfrsf11a, Vsnl1, Grm7, Nr3c1…
GO:0030855	2.39e-05	4.62	0.999988	54	349	epithelial cell differentiation	BP	Fosl2, C1galt1, Pou3f1, Tgfb2, Slc4a7, Thrb, Fgf10, Trim16, Cldn1, Cav1, Pde2a, Mycn, Atp2b2, Tgm3, Fat1, Fgfr1, Fgfr2, Foxp1, Hsd17b4, Cdk6, Cdkn1c, Met, Heg1, Ovol2, Apc, Ajap1, Arntl, Ascl1, Mef2c, Whrn, Id2, Prom1, Vim, Gpsm2, Shroom3, Tjp2, Eya1, Rfx3, Tgfb1i1, Frmd6, Nr0b1, Arhgef26, Vegfa, Fzd7, Gpx1, Hey2, Pparg, Wt1, Onecut2, Stat5b, Wnt7b, Bmp2, Pcdh15, Crhr1
GO:0070372	2.42e-05	4.62	0.999991	31	174	regulation of ERK1 and ERK2 cascade	BP	Ctgf, F2r, Gcnt2, Dlg1, Dusp6, Rasgrp1, Spry1, Dusp4, Htr2a, Fgf10, Cav1, Ptk2b, Fgfr2, Dcc, Timp3, Itgb3, Angpt1, Chrna7, Npnt, Bmper, Camk2d, Epha7, Tnfrsf11a, Vegfa, Ephb1, Htr2c, Adra1a, Ramp3, Pdgfc, Fbxw7, Bmp2
4514	2.47e-05	4.61	0.999994	17	61	Cell adhesion molecules (CAMs)	KEGG	Itgb8, Cldn1, Nrxn3, Jam2, Itgav, Cadm3, Cadm1, Ptprf, Cntnap2, Negr1, Ncam2, Sdc1, Nlgn1, Itga9, Alcam, Itga4, Vcan
GO:0098988	2.64e-05	4.58	0.999999	6	8	G-protein coupled glutamate receptor activity	MF	Grm4, Grik3, Grm5, Grm7, Grm3, Grm8
GO:0022891	2.65e-05	4.58	0.999985	78	603	substrate-specific transmembrane transporter activity	MF	Kcnf1, Scn1a, Slc4a7, Hcn1, Trpc6, Slc24a4, Slc16a1, Gabra4, Rasa3, Ptk2b, Kcnab1, Cacna1i, Kcng1, Atp2b2, Slco3a1, Trpv6, Gria1, Trpc5, Cacna1e, Cacna1h, Gjc1, Itgav, Atp2a2, Slc30a3, Slc4a4, Xpr1, Slc22a3, Grin3a, Hrh1, Slc29a4, Grik3, Slc25a1, Scn3b, Abcc5, Serinc2, Chrna3, Gria4, Piezo2, Sfxn5, Glra2, Slc6a6, Kcnn2, Atp1b1, Mcu, Gabrb3, Chrna7, Cacna2d3, Gabrg3, Slc20a1, Kcnip2, Kcns3, Gabra1…
GO:0050795	2.66e-05	4.57	0.999994	15	54	regulation of behavior	BP	Ptger3, Htr2a, Hcrtr2, Tacr3, Npy2r, Reln, Htr7, Mef2c, Adora1, Nlgn1, Mchr1, Cntnap4, Htr1b, Crhr1, Htr1a
GO:0016358	2.74e-05	4.56	0.999988	44	246	dendrite development	BP	Klhl1, Trpc6, Matn2, Prex1, Sgk1, Ephb3, Ptprd, Trpc5, Igsf9, Cux2, Pak1, Csmd3, Reln, Cdk5r1, Eef2k, Grin3a, Ptprf, Sema3a, Foxo6, Met, Asap1, Arid1b, Chrna3, Rap2a, Ntrk2, Slitrk5, Mef2c, Spire1, Chrna7, Vldlr, Nlgn1, Fmn1, Sdk1, Ngef, Il1rapl1, Dab1, Nsmf, Plk2, Btbd3, Nr3c1, Ephb1, Il1rap, Fat3, Itpka
GO:0045907	2.95e-05	4.53	0.999996	10	26	positive regulation of vasoconstriction	BP	F2r, Ptger3, Npy1r, Htr2a, Cav1, Hrh1, Oxtr, Avpr1a, Htr2c, Adra1a
GO:0051968	3e-05	4.52	0.999996	10	22	positive regulation of synaptic transmission, glutamatergic	BP	Cckbr, Ptk2b, Reln, Glul, Gria4, Ntrk2, Nlgn1, Oxtr, Tnr, Tshz3
GO:0050801	3.09e-05	4.51	0.999984	67	491	ion homeostasis	BP	F2r, Tmtc2, Lipg, Tgfb2, Pde4d, Slc4a7, Ptger3, Hcn1, Trpc6, Calb1, Slc24a4, Npy1r, Cckbr, Htr2a, Hcrtr2, Cav1, Parp1, Ptk2b, Nr3c2, Cemip, Cacna1i, Trhr, Atp2b2, Swap70, Sgk1, Gpr6, Trpv6, Trpc5, Itgav, Bok, Atp2a2, Slc30a3, Slc4a4, Npy2r, Xpr1, Itgb3, B2m, Scn3b, Letmd1, Micu1, Sfxn5, S1pr1, Prkce, Adora1, Atp1b1, Mcu, Cib2, Chrna7, Mt1, Oxtr, Mchr1, Camk2d, Grin2a, Avpr1a, Trpc4, Atp2b1, Prkd1…
GO:0010720	3.17e-05	4.5	0.999983	67	464	positive regulation of cell development	BP	Brinp3, Trib1, Brinp1, Trpc6, Efna5, Rasal1, Syt17, Ptk2b, Prex1, Fgfr1, Net1, Sgk1, Syt4, Serpine2, Ptprd, Trpc5, Dcc, Ntn1, S100a10, Cux2, Pak1, Itgb3, Reln, Eef2k, Ptprf, Sema3a, Foxo6, Ptn, Met, Twf2, Sema5a, Negr1, Htr7, Ascl1, Ntrk2, Pde3a, Enc1, Gprc5b, Mef2c, Id2, Brinp2, Vldlr, Nlgn1, Kit, Man2a1, Vim, Rfx3, Rims2, Rgma, Grm5, Bcl6, Prkd1, Il1rapl1, Vwc2l, Dab1, Nsmf, Vegfa, Nr3c1, Myc, …
GO:0099589	3.24e-05	4.49	0.999998	7	14	serotonin receptor activity	MF	Htr2a, Chrna3, Htr7, Htr2c, Htr4, Htr1b, Htr1a
GO:0048732	3.27e-05	4.49	0.999985	47	282	gland development	BP	Cited2, Slit2, Cckbr, Fgf10, Cav1, Plxna1, Capn1, Aldh1a3, Atp2b2, Fgfr1, Fgfr2, Ephb3, Serpine2, Sulf2, Eda, Mkl2, Ntn1, Cdkn1c, Cadm1, Sema3a, Ntn4, Ptn, Met, Apc, Bcl2l11, Ascl1, Jarid2, Tgfa, Id2, Ahr, Oxtr, Man2a1, Lmo4, Sfrp1, Nr0b1, Tnfrsf11a, Vegfa, Nr3c1, Nrg3, Gpx1, Wt1, Onecut2, Stat5b, Rxfp1, Bmp2, Crhr1, Plxnd1
GO:0032970	3.44e-05	4.46	0.999984	43	261	regulation of actin filament-based process	BP	Ctgf, Tgfb2, Pde4d, Dlg1, Dlc1, Ptger3, Slit2, Efna5, Arhgap28, Cav1, Pik3r1, Ptk2b, Prex1, Swap70, Inpp5k, S100a10, Atp2a2, Pak1, Gsn, Itgb3, Cdk5r1, Pik3r2, Met, Twf2, Prkcd, Sema5a, Wasf1, S1pr1, Mef2c, Prkce, Arfgef1, Spire1, Cdc42ep3, Phldb2, Fmn1, Frmd6, Iqgap2, Pkp2, Ppm1e, Coro1a, Kcnj2, Fgf13, Ntf3
GO:0046883	3.49e-05	4.46	0.999986	32	176	regulation of hormone secretion	BP	Ptger3, Slc16a1, Npy1r, Cckbr, Efna5, Htr2a, Acvr1c, Myrip, Fgfr1, Cacna1e, Nell2, Glul, Acvr2a, Inhbb, Arntl, Prkce, Adora1, Mcu, Pim3, Stxbp5l, Sfrp1, Rfx3, Nnat, Vsnl1, Htr2c, Nov, Pparg, Inhba, Pex5l, Crhr1, Htr1a, Nr1d1
GO:0019220	3.63e-05	4.44	0.999977	137	1185	regulation of phosphate metabolic process	BP	Ctgf, F2r, Trib1, Bmp3, Tgfb2, Pde4d, Gcnt2, Dlg1, Dusp6, Dlc1, Rbpms, Ptger3, Slit2, Rasgrp1, Trpc6, Spry1, Efna5, Dusp4, Htr2a, Pkib, Fgf10, Cav1, Parp1, Dusp7, Pde2a, Pik3r1, Ptk2b, Cemip, Fzd8, Prex1, Epha8, Rtn4r, Swap70, Fgfr1, Fgfr2, Peli2, Rtn4rl1, Igfbp4, Trpc5, Dcc, Itgav, Inpp5k, Npy2r, Pak1, Timp3, Itgb3, Pik3r5, Cdkn1c, Reln, Cdk5r1, Eef2k, Ptprj, Phip, Traf6, Pik3r2, Elfn1, Grm4, Me…
GO:0002209	3.64e-05	4.44	0.999993	13	41	behavioral defense response	BP	Brinp1, Cckbr, Cacna1e, Npy2r, Ankfn1, Mef2c, Spire1, Grm7, Gabra5, Htr2c, Lypd1, Htr1a, Grik2
GO:0072073	3.83e-05	4.42	0.999988	22	95	kidney epithelium development	BP	Dlg1, Slit2, Calb1, Spry1, Fgfr1, Fgfr2, Maged1, Mef2c, Npnt, Prom1, Fmn1, Bmper, Eya1, Sfrp1, Epha7, Vegfa, Myc, Tshz3, Wt1, Wnt7b, Bmp2, Vcan
GO:0045295	4.14e-05	4.38	0.999999	6	8	gamma-catenin binding	MF	Ctnna1, Ptprj, Apc, Ptprt, Ptprk, Dsc3
GO:0051174	4.26e-05	4.37	0.999972	137	1189	regulation of phosphorus metabolic process	BP	Ctgf, F2r, Trib1, Bmp3, Tgfb2, Pde4d, Gcnt2, Dlg1, Dusp6, Dlc1, Rbpms, Ptger3, Slit2, Rasgrp1, Trpc6, Spry1, Efna5, Dusp4, Htr2a, Pkib, Fgf10, Cav1, Parp1, Dusp7, Pde2a, Pik3r1, Ptk2b, Cemip, Fzd8, Prex1, Epha8, Rtn4r, Swap70, Fgfr1, Fgfr2, Peli2, Rtn4rl1, Igfbp4, Trpc5, Dcc, Itgav, Inpp5k, Npy2r, Pak1, Timp3, Itgb3, Pik3r5, Cdkn1c, Reln, Cdk5r1, Eef2k, Ptprj, Phip, Traf6, Pik3r2, Elfn1, Grm4, Me…
GO:0015015	4.38e-05	4.36	1	4	4	heparan sulfate proteoglycan biosynthetic process, enzymatic modification	BP	Hs3st5, Hs6st1, Hs6st2, Hs6st3
GO:0048878	4.57e-05	4.34	0.999973	88	698	chemical homeostasis	BP	F2r, Tmtc2, Lipg, Tgfb2, Pde4d, Slc4a7, Ptger3, Hcn1, Trpc6, Calb1, Slc24a4, Slc16a1, Npy1r, Cckbr, Efna5, Htr2a, Hcrtr2, Cldn1, Cav1, Parp1, Pik3r1, Ptk2b, Nr3c2, Cemip, Cacna1i, Trhr, Atp2b2, Swap70, Sgk1, Gpr6, Trpv6, Trpc5, Cacna1e, Itgav, Inpp5k, Bok, Atp2a2, Slc30a3, Slc4a4, Npy2r, Rora, Xpr1, Itgb3, B2m, Pik3r2, Met, Scn3b, Letmd1, Micu1, Sfxn5, S1pr1, Gprc5b, Prkce, Adora1, Atp1b1, Mcu, C…
GO:0019233	4.66e-05	4.33	0.999986	20	86	sensory perception of pain	BP	F2r, Scn1a, Npy1r, Cckbr, Htr2a, Fgfr1, Cacna1e, Cacna1h, Npy2r, Mgll, Htr7, Adora1, Mme, Grin2a, Kcnd2, Ephb1, Htr2c, Nov, Grm3, Grm8
GO:0001640	4.81e-05	4.32	0.999999	5	6	adenylate cyclase inhibiting G-protein coupled glutamate receptor activity	MF	Grm4, Grik3, Grm7, Grm3, Grm8
GO:0045165	4.88e-05	4.31	0.999982	28	145	cell fate commitment	BP	Tgfb2, Ets2, Dusp6, Fgf10, Tal1, Fgfr1, Fgfr2, Prickle2, Rora, Ascl1, Mef2c, Gas1, Id2, Sox1, Lmo4, Eya1, Zfp521, Sfrp1, Tgfb1i1, Fzd7, Hey2, Pparg, Wt1, Onecut2, Wnt7b, Bmp2, Fgf13, Ntf3
GO:0050789	5.03e-05	4.3	0.999962	627	6977	regulation of biological process	BP	Mest, Ctgf, Fosl2, F2r, Slc5a3, Brinp3, Grk5, Trib1, Pdlim1, Maml3, Kcnf1, Sik1, Tiparp, Cited2, Stac, Brinp1, Adcy8, Bmp3, Tex15, Gpr26, Pou3f1, Lipg, Tpbg, Nedd9, Tgfb2, Ets2, Spsb1, Abcd2, Elmo1, Scn1a, Chrm4, Pde4d, Gcnt2, Dlg1, Hunk, Itgb8, Dusp6, Ptchd1, Sorcs3, Dlc1, Rbpms, Chml, Thrb, Ptger3, Rab3c, Arhgap20, Hcn1, Chodl, Pmaip1, Trhde, Slit2, Rasgrp1, Trpc6, Calb1, Sstr2, Slc16a1, Pknox2…
GO:0001932	5.1e-05	4.29	0.999968	112	938	regulation of protein phosphorylation	BP	Ctgf, F2r, Trib1, Bmp3, Tgfb2, Pde4d, Gcnt2, Dlg1, Dusp6, Rbpms, Ptger3, Slit2, Rasgrp1, Trpc6, Spry1, Efna5, Dusp4, Htr2a, Pkib, Fgf10, Cav1, Dusp7, Pik3r1, Ptk2b, Cemip, Fzd8, Prex1, Epha8, Rtn4r, Fgfr1, Fgfr2, Peli2, Rtn4rl1, Igfbp4, Trpc5, Dcc, Itgav, Inpp5k, Pak1, Timp3, Itgb3, Pik3r5, Reln, Cdk5r1, Eef2k, Ptprj, Phip, Traf6, Pik3r2, Grm4, Met, Sema4c, Prkcd, Hsph1, Apc, Angpt1, Chrna3, Mage…
GO:0008285	5.28e-05	4.28	0.999972	61	441	negative regulation of cell proliferation	BP	F2r, Trib1, Cited2, Tgfb2, Dlg1, Dlc1, Pmaip1, Slit2, Sstr2, Tes, Spry1, Fgf10, Tnn, Sstr1, Acvr1c, Cav1, Pik3r1, Ptk2b, Ptpru, Ndrg1, Fgfr2, Mcc, Smarca2, Serpine2, Pmp22, Ctnna1, Pds5b, Pak1, Cdk6, Ptprj, Ptprf, Ptn, Pttg1, Ovol2, Apc, Maged1, Cdh13, Mef2c, Rps6ka2, Jarid2, Gas1, Cblb, Adora1, Sstr4, Zbtb16, Id2, Sfrp1, Bcl6, Slit3, Ephb1, Sh3bp4, Myc, Nov, Pkp2, Pparg, Inhba, Wt1, Nell1, Ptprk…
GO:0009187	5.6e-05	4.25	0.999981	23	110	cyclic nucleotide metabolic process	BP	Adcy8, Pde4d, Ptger3, Pde2a, Ptk2b, Atp2b2, Npy2r, Rora, Adcy2, Adcy1, Pde3a, Sstr4, Gucy1b3, Grm7, Vegfa, Cap2, Gucy2e, Htr2c, Ramp3, Grm8, Npr3, Htr1b, Crhr1
GO:0120035	5.78e-05	4.24	0.999967	78	570	regulation of plasma membrane bounded cell projection organization	BP	Chodl, Slit2, Trpc6, Efna5, Rasal1, Cav1, Plxna1, Syt17, Ptk2b, Prex1, Rtn4r, Fgfr1, Sgk1, Syt4, Rtn4rl1, Ephb3, Serpine2, Ptprd, Pmp22, Trpc5, Dcc, Ntn1, Cux2, Pak1, Csmd3, Reln, Cdk5r1, Eef2k, B2m, Ptprf, Sema3a, Xylt1, Foxo6, Ptn, Met, Asap1, Twf2, Mgll, Prkcd, Apc, Sema5a, Negr1, Chrna3, Rap2a, Htr7, Ntrk2, Enc1, Gprc5b, Mef2c, Chn1, Vldlr, Cdc42ep3, Nlgn1, Ntm, Kit, Vim, Sdk1, Sfrp1, Epha7, …
GO:0060291	6.21e-05	4.21	0.999983	18	75	long-term synaptic potentiation	BP	Calb1, Ptk2b, Serpine2, Pak1, Reln, Htr7, Ntrk2, Lrrtm2, Chrna7, Nlgn1, Nrgn, Grin2a, Plk2, Tnr, Rasgrf2, Tshz3, Slc24a2, Crhr1
GO:0010871	6.34e-05	4.2	1	4	4	negative regulation of receptor biosynthetic process	BP	Itgav, Itgb3, Pparg, Nr1d1
GO:0016049	6.64e-05	4.18	0.999966	56	395	cell growth	BP	Ctgf, Tgfb2, Slit2, Efna5, Tnn, Rasal1, Plxna1, Syt17, Kif26a, Ptk2b, Nme6, Rtn4r, Sgk1, Syt4, Igfbp4, Smarca2, Serpine2, Foxp1, Trpc5, Itgav, Ntn1, Pak1, Itgb3, Hrasls, Cdk5r1, Ptprj, Cadm1, Sema3a, Pttg1, Twf2, Mgll, Sema5a, Wasf1, Gas1, Sgk3, Psrc1, Flrt3, Camk2d, Sfrp1, Epha7, Rims2, Rgma, Avpr1a, Bcl6, Slit3, Vegfa, Nr3c1, Tnr, Sh3bp4, Nov, Adra1a, Syt1, Pparg, Inhba, Wt1, Fgf13
GO:0050906	6.72e-05	4.17	0.999985	14	49	detection of stimulus involved in sensory perception	BP	Scn1a, Htr2a, Atp2b2, Serpine2, Sema5a, Htr7, Piezo2, Adora1, Kit, Ephb1, Myc, Asic2, Grm8, Pcdh15
GO:0004890	6.74e-05	4.17	0.999994	7	15	GABA-A receptor activity	MF	Gabra4, Gabrb3, Gabrg3, Gabra1, Gabra5, Gabra2, Gabrg1
GO:0070838	6.83e-05	4.17	0.999967	46	301	divalent metal ion transport	BP	Ctgf, F2r, Stac, Tgfb2, Pde4d, Ptger3, Trpc6, Slc24a4, Htr2a, Cav1, Ptk2b, Cemip, Cacna1i, Atp2b2, Trpv6, Trpc5, Cacna1e, Cacna1h, Itgav, Inpp5k, Atp2a2, Slc30a3, Itgb3, Grin3a, B2m, Hrh1, Micu1, Prkce, Atp1b1, Mcu, Chrna7, Cacna2d3, Mchr1, Camk2d, Grin2a, Trpc4, Atp2b1, Prkd1, Ryr3, Htr2c, Adra1a, Ramp3, Coro1a, Kcnj2, Slc24a2, Crhr1
GO:0045785	6.99e-05	4.16	0.999969	37	226	positive regulation of cell adhesion	BP	Cited2, Tgfb2, Gcnt2, Rasgrp1, Cav1, Ptk2b, Prex1, Net1, Egr3, Efnb1, Itgav, S100a10, Npy2r, Itgb3, Cdk6, Ptprj, Traf6, Pik3r2, Ptn, Il4ra, Hsph1, Apc, Angpt1, Cdh13, Prkce, Zbtb16, Ephb6, Npnt, Col26a1, Fmn1, Utrn, Bcl6, Vegfa, Edil3, Coro1a, Stat5b, Itga4
GO:0008188	7.27e-05	4.14	0.999992	8	21	neuropeptide receptor activity	MF	Sstr2, Npy1r, Sstr1, Tacr3, Gpr139, Npy2r, Sstr4, Mchr1
GO:0042596	7.31e-05	4.14	0.999985	13	44	fear response	BP	Brinp1, Cacna1e, Npy2r, Ankfn1, Mef2c, Spire1, Grm7, Gabra5, Htr2c, Lypd1, Crhr1, Htr1a, Grik2
GO:0048584	7.31e-05	4.14	0.999952	138	1226	positive regulation of response to stimulus	BP	Ctgf, F2r, Cited2, Bmp3, Tgfb2, Gcnt2, Rbpms, Ptger3, Pmaip1, Slit2, Rasgrp1, Htr2a, Fgf10, Trim16, Klf14, Cav1, Unc5b, Parp1, Pde2a, Pik3r1, Ptk2b, Fzd8, Rspo2, Ccbe1, Aldh1a3, Tril, Epha8, Rftn1, Rtn4r, Swap70, Fgfr1, Fgfr2, Peli2, Igfbp4, Foxp1, Neto1, Sulf2, Ctnna1, Scube1, Dcc, Eda, Itgav, Bok, Cux2, Pak1, Timp3, Gsn, Itgb3, Cdk19, Pik3r5, Akt3, Reln, Ptprj, Cadm1, B2m, Hip1, Phip, Traf6, Gr…
GO:0031344	7.63e-05	4.12	0.999956	78	575	regulation of cell projection organization	BP	Chodl, Slit2, Trpc6, Efna5, Rasal1, Cav1, Plxna1, Syt17, Ptk2b, Prex1, Rtn4r, Fgfr1, Sgk1, Syt4, Rtn4rl1, Ephb3, Serpine2, Ptprd, Pmp22, Trpc5, Dcc, Ntn1, Cux2, Pak1, Csmd3, Reln, Cdk5r1, Eef2k, B2m, Ptprf, Sema3a, Xylt1, Foxo6, Ptn, Met, Asap1, Twf2, Mgll, Prkcd, Apc, Sema5a, Negr1, Chrna3, Rap2a, Htr7, Ntrk2, Enc1, Gprc5b, Mef2c, Chn1, Vldlr, Cdc42ep3, Nlgn1, Ntm, Kit, Vim, Sdk1, Sfrp1, Epha7, …
GO:0072511	7.67e-05	4.12	0.999963	46	302	divalent inorganic cation transport	BP	Ctgf, F2r, Stac, Tgfb2, Pde4d, Ptger3, Trpc6, Slc24a4, Htr2a, Cav1, Ptk2b, Cemip, Cacna1i, Atp2b2, Trpv6, Trpc5, Cacna1e, Cacna1h, Itgav, Inpp5k, Atp2a2, Slc30a3, Itgb3, Grin3a, B2m, Hrh1, Micu1, Prkce, Atp1b1, Mcu, Chrna7, Cacna2d3, Mchr1, Camk2d, Grin2a, Trpc4, Atp2b1, Prkd1, Ryr3, Htr2c, Adra1a, Ramp3, Coro1a, Kcnj2, Slc24a2, Crhr1
GO:0051130	7.68e-05	4.11	0.999951	116	959	positive regulation of cellular component organization	BP	Ctgf, Gpr26, Tpbg, Tgfb2, Dlg1, Pmaip1, Slitrk4, Efna5, Pkib, Cldn1, Rasal1, Tal1, Cav1, Syt17, Ptk2b, Prex1, Sirpa, Swap70, Fgfr1, Net1, Sgk1, Syt4, Ephb3, Serpine2, Ptprd, Trpc5, Dcc, Bok, Ntn1, Mfge8, S100a10, Cux2, Pak1, Gsn, Itgb3, Reln, Eef2k, Ptprj, B2m, Hip1, Phip, Ptprf, Foxo6, Ptn, Met, Asap1, Il4ra, Twf2, Prkcd, Apc, Sema5a, Angpt1, Wasf1, Negr1, Sub1, Cbln2, Htr7, Bcl2l11, Ntrk2, Lrrt…
GO:0022843	7.8e-05	4.11	0.999974	23	107	voltage-gated cation channel activity	MF	Kcnf1, Hcn1, Kcnab1, Cacna1i, Kcng1, Cacna1e, Cacna1h, Itgav, Cacna2d3, Kcnip2, Kcns3, Grin2a, Cnga4, Kcnh3, Il1rapl1, Grm7, Kcnq5, Kcnd2, Kcnh5, Kcnj2, Kcnh1, Kcng3, Kcnk9
GO:0001655	8e-05	4.1	0.999964	39	225	urogenital system development	BP	C1galt1, Tiparp, Tgfb2, Dlg1, Slit2, Calb1, Spry1, Fgf10, Fgfr1, Fgfr2, Ephb3, Sulf2, Itgb3, Cdkn1c, Schip1, Apc, Angpt1, Maged1, Bcl2l11, Mef2c, Zbtb16, Id2, Ahr, Npnt, Prom1, Fmn1, Bmper, Eya1, Sfrp1, Epha7, Plce1, Itgb4, Vegfa, Myc, Tshz3, Wt1, Wnt7b, Bmp2, Vcan
GO:0048522	8.22e-05	4.08	0.999939	339	3464	positive regulation of cellular process	BP	Ctgf, Fosl2, F2r, Brinp3, Grk5, Trib1, Maml3, Cited2, Brinp1, Bmp3, Gpr26, Pou3f1, Tpbg, Tgfb2, Ets2, Abcd2, Gcnt2, Dlg1, Dusp6, Dlc1, Rbpms, Thrb, Ptger3, Pmaip1, Slit2, Rasgrp1, Trpc6, Calb1, Slitrk4, Cckbr, Efna5, Htr2a, Pkib, Fgf10, Trim16, Acvr1c, Rorb, Tacr3, Klf14, Cldn1, Rasal1, Tal1, Myrip, Cav1, Unc5b, Parp1, Syt17, Pik3r1, Ptk2b, Cemip, Fzd8, Cacna1i, Prex1, Rspo2, Ccbe1, Aldh1a3, Hif3…
GO:0045823	8.62e-05	4.06	0.999988	9	25	positive regulation of heart contraction	BP	Ctgf, Tgfb2, Tacr3, Scn3b, Smtn, Chrna7, Avpr1a, Adra1a, Hey2
GO:0005267	8.66e-05	4.06	0.999973	20	91	potassium channel activity	MF	Kcnf1, Hcn1, Kcnab1, Kcng1, Grik3, Kcnn2, Kcnip2, Kcns3, Kcnk13, Cnga4, Kcnh3, Kcnq5, Kcnd2, Kcnh5, Kcnj2, Kcnip4, Kcnh1, Kcng3, Kcnk9, Grik2
GO:0008083	8.81e-05	4.06	0.999978	15	72	growth factor activity	MF	Ctgf, Bmp3, Tgfb2, Fgf10, Ptn, Inhbb, Tgfa, Vegfa, Nov, Nrg3, Inhba, Pdgfc, Bmp2, Fgf13, Ntf3
GO:0030325	8.9e-05	4.05	0.999992	7	15	adrenal gland development	BP	Cited2, Cdkn1c, Ascl1, Nr0b1, Nr3c1, Wt1, Crhr1
4360	9.32e-05	4.03	0.999966	26	120	Axon guidance	KEGG	Slit2, Efna5, Plxna1, Unc5b, Epha8, Efnb1, Ephb3, Dcc, Ntn1, Pak1, Sema3a, Ntn4, Met, Sema4c, Sema5a, Ephb6, Unc5d, Epha7, Ngef, Slit3, Epha6, Unc5c, Ephb1, Ntng1, Sema6a, Lrrc4c
GO:0048511	9.76e-05	4.01	0.999956	37	221	rhythmic process	BP	Sik1, Ptger3, Cckbr, Hcrtr2, Prkg2, Rorb, Npy2r, Rora, Cdk5r1, Grin3a, Hrh1, Schip1, Ankfn1, Angpt1, Enox2, Maged1, Nrip1, Htr7, Adcy1, Arntl, Ntrk2, Adora1, Id2, Chrna7, Ahr, Nlgn1, Kit, Grin2a, Hlf, Tnfrsf11a, Vegfa, Npas2, Kcnd2, Pparg, Inhba, Stat5b, Nr1d1
GO:1902533	9.8e-05	4.01	0.999943	75	590	positive regulation of intracellular signal transduction	BP	Ctgf, F2r, Tgfb2, Gcnt2, Pmaip1, Rasgrp1, Htr2a, Fgf10, Cav1, Unc5b, Ptk2b, Fzd8, Epha8, Rtn4r, Fgfr1, Fgfr2, Peli2, Igfbp4, Dcc, Eda, Itgav, Bok, Pak1, Itgb3, Pik3r5, Akt3, Reln, Ptprj, Traf6, Grm4, Met, Sema4c, Prkcd, Sema5a, Angpt1, Maged1, Cdh13, Bcl2l11, Ntrk2, Gprc5b, Tnfrsf19, Clu, Prkce, Arfgef1, Tgfa, Adora1, Sstr4, Ksr1, Sash1, Chrna7, Npnt, Plcb1, Nlgn1, Slc20a1, Lurap1, Kit, Rasgrf1, …
GO:0010959	0.0001018	3.99	0.999953	40	261	regulation of metal ion transport	BP	F2r, Sik1, Stac, Tgfb2, Pde4d, Dlg1, Ptger3, Trpc6, Htr2a, Cav1, Ptk2b, Cemip, Kcnab1, Kcng1, Atp2b2, Sgk1, Serpine2, Neto1, Inpp5k, Itgb3, Akt3, B2m, Scn3b, Prkce, Adora1, Atp1b1, Dpp10, Plcb1, Kcnip2, Ahcyl1, Neto2, Mchr1, Camk2d, Trpc4, Prkd1, Ramp3, Coro1a, Kcnj2, Kcnip4, Crhr1
GO:0009968	0.000105541	3.98	0.999934	99	837	negative regulation of signal transduction	BP	Grk5, Trib1, Tgfb2, Dlg1, Dusp6, Dlc1, Ptger3, Slit2, Spry1, Dusp4, Rgs4, Fgf10, Tnn, Rasal1, Cav1, Cxxc4, Unc5b, Dusp7, Kif26a, Rasa3, Prex1, Rnf152, Nkd2, Rtn4r, BC048403, Shisa2, Mcc, Rtn4rl1, Serpine2, Sulf2, Ptprd, Ctnna1, Itgav, Inpp5k, Prickle1, Bok, Npy2r, Rora, Prkacb, Timp3, Ptprj, Phip, Ptprf, Pik3r2, Kctd13, Nlk, Met, Bicc1, Ovol2, Prkcd, Hsph1, Grb14, Apc, Bambi, G2e3, Arntl, Rgs8, C…
GO:0007218	0.000109018	3.96	0.999982	10	37	neuropeptide signaling pathway	BP	Sstr2, Hcrtr2, Sstr1, Tenm1, Pcsk1n, Npy, Glra2, Mchr1, Glra3, Crhr1
GO:0051967	0.0001113	3.95	0.999993	6	11	negative regulation of synaptic transmission, glutamatergic	BP	Htr2a, Npy2r, Grik3, Adora1, Htr1b, Grik2
GO:0050769	0.0001158	3.94	0.999937	60	417	positive regulation of neurogenesis	BP	Brinp3, Brinp1, Trpc6, Efna5, Rasal1, Syt17, Ptk2b, Fgfr1, Sgk1, Syt4, Serpine2, Ptprd, Trpc5, Dcc, Ntn1, Cux2, Pak1, Reln, Eef2k, Ptprf, Sema3a, Foxo6, Ptn, Met, Twf2, Sema5a, Negr1, Htr7, Ascl1, Ntrk2, Enc1, Gprc5b, Mef2c, Id2, Brinp2, Vldlr, Nlgn1, Kit, Man2a1, Vim, Rims2, Rgma, Grm5, Bcl6, Prkd1, Il1rapl1, Vwc2l, Dab1, Nsmf, Vegfa, Nr3c1, Myc, Il1rap, Syt1, Sema6a, Pparg, Itpka, Bmp2, Plxnd1,…
GO:0009914	0.000125373	3.9	0.999944	36	219	hormone transport	BP	Ptger3, Slc16a1, Npy1r, Cckbr, Efna5, Htr2a, Acvr1c, Myrip, Fgfr1, Trpv6, Cacna1e, Nell2, Glul, Acvr2a, Inhbb, Arntl, Prkce, Adora1, Mcu, Pim3, Stxbp5l, Sfrp1, Rfx3, Rims2, Nnat, Vsnl1, Htr2c, Nov, Pparg, Inhba, Pex5l, Ildr2, Crhr1, Htr1a, Nr1d1, Crym
GO:0050794	0.000126943	3.9	0.999903	596	6610	regulation of cellular process	BP	Ctgf, Fosl2, F2r, Brinp3, Grk5, Trib1, Pdlim1, Maml3, Sik1, Tiparp, Cited2, Stac, Brinp1, Adcy8, Bmp3, Tex15, Gpr26, Pou3f1, Lipg, Tpbg, Tgfb2, Ets2, Spsb1, Abcd2, Elmo1, Chrm4, Pde4d, Gcnt2, Dlg1, Hunk, Dusp6, Ptchd1, Sorcs3, Dlc1, Rbpms, Chml, Thrb, Ptger3, Rab3c, Arhgap20, Hcn1, Chodl, Pmaip1, Trhde, Slit2, Rasgrp1, Trpc6, Calb1, Sstr2, Slc16a1, Pknox2, Gabra4, Npy1r, Tes, Spry1, Gpr22, Slitrk…
GO:0007197	0.000128554	3.89	0.999998	4	5	adenylate cyclase-inhibiting G-protein coupled acetylcholine receptor signaling pathway	BP	Chrm4, Chrm3, Chrm1, Chrm2
GO:0007207	0.000128554	3.89	0.999998	4	5	phospholipase C-activating G-protein coupled acetylcholine receptor signaling pathway	BP	Chrm4, Chrm3, Chrm1, Chrm2
GO:0016907	0.000128554	3.89	0.999998	4	5	G-protein coupled acetylcholine receptor activity	MF	Chrm4, Chrm3, Chrm1, Chrm2
GO:0099528	0.000128554	3.89	0.999998	4	5	G-protein coupled neurotransmitter receptor activity	MF	Chrm4, Chrm3, Chrm1, Chrm2
GO:0050880	0.000128742	3.89	0.999957	21	101	regulation of blood vessel size	BP	F2r, Ptger3, Npy1r, Htr2a, Chrm3, Cav1, Nts, Hrh1, Chrm1, Mgll, Htr7, Adora1, Ahr, Oxtr, Avpr1a, Htr2c, Adra1a, Gpx1, Asic2, Htr1b, Htr1a
GO:0010721	0.000129352	3.89	0.999939	41	263	negative regulation of cell development	BP	Brinp1, Ptger3, Slit2, Trpc6, Efna5, Cav1, Mycn, Rtn4r, Syt4, Rtn4rl1, Foxp1, Pmp22, Ctnna1, Trpc5, Ntn1, Pak1, Cdk5r1, B2m, Sema3a, Xylt1, Ptn, Asap1, Grb14, Sema5a, Ascl1, Id2, Nlgn1, Ntm, Vim, Tjp2, Epha7, Rgma, Cntn4, Ngef, Dab1, Plk2, Tnr, Nrg3, Fat3, Wnt7b, Fgf13
GO:0004993	0.00013986	3.85	0.99999	6	12	G-protein coupled serotonin receptor activity	MF	Htr2a, Htr7, Htr2c, Htr4, Htr1b, Htr1a
GO:0001662	0.000142098	3.85	0.999971	12	40	behavioral fear response	BP	Brinp1, Cacna1e, Npy2r, Ankfn1, Mef2c, Spire1, Grm7, Gabra5, Htr2c, Lypd1, Htr1a, Grik2
GO:0048514	0.000144619	3.84	0.999924	53	352	blood vessel morphogenesis	BP	Ctgf, C1galt1, Tiparp, Cited2, Tgfb2, Slit2, Ism1, Fgf10, Tal1, Cav1, Unc5b, Ptk2b, Fzd8, Ccbe1, Hif3a, Fgfr1, Fgfr2, Egr3, Ephb3, Nrxn3, Gjc1, Itgav, Mkl2, Mfge8, Rora, Itgb3, Ptprj, Ptn, Heg1, Ovol2, Sema5a, Angpt1, Cdh13, Ntrk2, S1pr1, Hs6st1, Tmem2, Tgfa, Sash1, Chrna7, Ahr, Bmper, Eya1, Prkd1, Vegfa, Ephb1, Nov, Gpx1, Hey2, Wt1, Fbxw7, Wnt7b, Plxnd1
GO:0042325	0.000145028	3.84	0.999905	118	1024	regulation of phosphorylation	BP	Ctgf, F2r, Trib1, Bmp3, Tgfb2, Pde4d, Gcnt2, Dlg1, Dusp6, Rbpms, Ptger3, Slit2, Rasgrp1, Trpc6, Spry1, Efna5, Dusp4, Htr2a, Pkib, Fgf10, Cav1, Dusp7, Pik3r1, Ptk2b, Cemip, Fzd8, Prex1, Epha8, Rtn4r, Fgfr1, Fgfr2, Peli2, Rtn4rl1, Igfbp4, Trpc5, Dcc, Itgav, Inpp5k, Pak1, Timp3, Itgb3, Pik3r5, Cdkn1c, Reln, Cdk5r1, Eef2k, Ptprj, Phip, Traf6, Pik3r2, Grm4, Met, Bard1, Sema4c, Prkcd, Hsph1, Apc, Angpt…
GO:0040007	0.000145044	3.84	0.99991	94	762	growth	BP	Ctgf, Cited2, Nedd9, Tgfb2, Pde4d, Dlg1, Dusp6, Slit2, Npy1r, Spry1, Efna5, Fgf10, Tnn, Acvr1c, Rasal1, Plxna1, Parp1, Syt17, Kif26a, Ptk2b, Nme6, Rspo2, Cspg5, Rftn1, Rtn4r, Fgfr1, Fgfr2, Sgk1, Syt4, Igfbp4, Smarca2, Serpine2, Foxp1, Trpc5, Itgav, Ntn1, Pak1, Itgb3, Hrasls, Cdkn1c, Cdk5r1, Ptprj, Cadm1, Phip, Nell2, Sema3a, Pttg1, Heg1, Twf2, Mgll, Sema5a, Wasf1, Enox2, Bcl2l11, S1pr1, Mef2c, Ja…
GO:0016310	0.000147356	3.83	0.999898	165	1534	phosphorylation	BP	Ctgf, F2r, Grk5, Trib1, Sik1, Bmp3, Tgfb2, Pde4d, Gcnt2, Dlg1, Hunk, Dusp6, Rbpms, Ptger3, Slit2, Rasgrp1, Trpc6, Spry1, Cckbr, Efna5, Dusp4, Htr2a, Pkib, Fgf10, Prkg2, Acvr1c, Cav1, Cad, Dusp7, Pik3r1, Ptk2b, Nme6, Cemip, Fzd8, Prex1, Dok4, Epha8, Rtn4r, Fgfr1, Fgfr2, Peli2, Sgk1, Rtn4rl1, Ephb3, Igfbp4, Trpc5, Dcc, Itgav, Inpp5k, Prkacb, Pak1, Timp3, Prkd3, Itgb3, Cdk19, Cdk6, Itpk1, Pik3r5, Ak…
GO:0007160	0.000154291	3.81	0.99994	27	136	cell-matrix adhesion	BP	Ctgf, Dlc1, Efna5, Tnn, Pik3r1, Ptk2b, Sirpa, Eda, Itgav, S100a10, Itgb3, Cdk6, Ptprj, Cdh13, Ajap1, Bcl2l11, Npnt, Phldb2, Fmn1, Utrn, Bcl6, Actn1, Itgb4, Vegfa, Onecut2, Ptprk, Itga4
GO:0071804	0.000154539	3.81	0.999943	24	122	cellular potassium ion transport	BP	Kcnf1, Dlg1, Ptger3, Hcn1, Cav1, Kcnab1, Kcng1, Neto1, Kcnn2, Atp1b1, Dpp10, Kcnip2, Neto2, Kcns3, Kcnk13, Kcnh3, Kcnq5, Kcnd2, Kcnh5, Kcnj2, Kcnip4, Kcnh1, Kcng3, Kcnk9
GO:0071805	0.000154539	3.81	0.999943	24	122	potassium ion transmembrane transport	BP	Kcnf1, Dlg1, Ptger3, Hcn1, Cav1, Kcnab1, Kcng1, Neto1, Kcnn2, Atp1b1, Dpp10, Kcnip2, Neto2, Kcns3, Kcnk13, Kcnh3, Kcnq5, Kcnd2, Kcnh5, Kcnj2, Kcnip4, Kcnh1, Kcng3, Kcnk9
GO:0043406	0.000154812	3.81	0.999938	28	152	positive regulation of MAP kinase activity	BP	F2r, Rasgrp1, Htr2a, Fgf10, Ptk2b, Fzd8, Fgfr1, Pak1, Pik3r5, Traf6, Grm4, Met, Prkcd, Maged1, Tgfa, Adora1, Sash1, Chrna7, Kit, Magi3, Grm5, Plce1, Tnfrsf11a, Vegfa, Pdgfc, Wnt7b, Bmp2, Ntf3
GO:0035150	0.000156217	3.81	0.999947	21	102	regulation of tube size	BP	F2r, Ptger3, Npy1r, Htr2a, Chrm3, Cav1, Nts, Hrh1, Chrm1, Mgll, Htr7, Adora1, Ahr, Oxtr, Avpr1a, Htr2c, Adra1a, Gpx1, Asic2, Htr1b, Htr1a
GO:0007210	0.000157767	3.8	0.999993	5	8	serotonin receptor signaling pathway	BP	Htr2a, Htr7, Htr2c, Htr1b, Htr1a
GO:0098664	0.000157767	3.8	0.999993	5	8	G-protein coupled serotonin receptor signaling pathway	BP	Htr2a, Htr7, Htr2c, Htr1b, Htr1a
GO:0004970	0.000158137	3.8	0.999982	8	17	ionotropic glutamate receptor activity	MF	Ptk2b, Gria1, Grin3a, Grik3, Gria4, Grin2a, Gria3, Grik2
GO:0043116	0.000160483	3.79	0.99999	6	10	negative regulation of vascular permeability	BP	Slit2, Pde2a, Ptprj, Angpt1, Pde3a, Nr3c1
GO:0034483	0.000160636	3.79	0.999989	6	11	heparan sulfate sulfotransferase activity	MF	Hs3st1, Ndst3, Hs3st5, Hs6st1, Hs6st2, Hs6st3
GO:0022857	0.000162807	3.79	0.999902	81	662	transmembrane transporter activity	MF	Slc5a3, Kcnf1, Abcd2, Scn1a, Slc4a7, Hcn1, Trpc6, Slc24a4, Slc16a1, Gabra4, Rasa3, Ptk2b, Kcnab1, Cacna1i, Kcng1, Atp2b2, Slco3a1, Trpv6, Gria1, Trpc5, Cacna1e, Cacna1h, Gjc1, Itgav, Atp2a2, Slc30a3, Slc4a4, Xpr1, Slc22a3, Grin3a, Hrh1, Slc29a4, Grik3, Slc25a1, Scn3b, Abcc5, Serinc2, Chrna3, Gria4, Piezo2, Sfxn5, Glra2, Slc6a6, Kcnn2, Atp1b1, Mcu, Gabrb3, Chrna7, Cacna2d3, Gabrg3, Slc20a1, Kcnip2…
GO:0035296	0.000164966	3.78	0.999946	20	94	regulation of tube diameter	BP	F2r, Ptger3, Npy1r, Htr2a, Chrm3, Cav1, Hrh1, Chrm1, Mgll, Htr7, Adora1, Ahr, Oxtr, Avpr1a, Htr2c, Adra1a, Gpx1, Asic2, Htr1b, Htr1a
GO:0097746	0.000164966	3.78	0.999946	20	94	regulation of blood vessel diameter	BP	F2r, Ptger3, Npy1r, Htr2a, Chrm3, Cav1, Hrh1, Chrm1, Mgll, Htr7, Adora1, Ahr, Oxtr, Avpr1a, Htr2c, Adra1a, Gpx1, Asic2, Htr1b, Htr1a
GO:0010769	0.000166177	3.78	0.999919	43	265	regulation of cell morphogenesis involved in differentiation	BP	Slit2, Trpc6, Efna5, Plxna1, Prex1, Rtn4r, Net1, Sgk1, Ephb3, Ptprd, Trpc5, Ntn1, S100a10, Cux2, Pak1, Itgb3, Reln, Cdk5r1, Eef2k, Ptprf, Sema3a, Met, Twf2, Mgll, Sema5a, Chrna3, Rap2a, Ntrk2, Chn1, Nlgn1, Vim, Epha7, Rgma, Ngef, Il1rapl1, Dab1, Nsmf, Vegfa, Tnr, Lrrc4c, Itpka, Fgf13, Plxnd1
GO:0033002	0.000173592	3.76	0.999931	27	143	muscle cell proliferation	BP	Trib1, Cited2, Tgfb2, Cav1, Pik3r1, Fgfr1, Fgfr2, Foxp1, Pak1, Itgb3, Traf6, Angpt1, Cdh13, S1pr1, Mef2c, Jarid2, Id2, Camk2d, Vegfa, Ephb1, Myc, Nov, Hey2, Pparg, Npr3, Stat5b, Htr1b
GO:0043114	0.000181631	3.74	0.999978	8	19	regulation of vascular permeability	BP	Slit2, Pde2a, Ptprj, Hrh1, Angpt1, Pde3a, Vegfa, Nr3c1
GO:0046983	0.00018448	3.73	0.999882	104	950	protein dimerization activity	MF	Tgfb2, Abcd2, Rbpms, Thrb, Slit2, Rasgrp1, Slc16a1, Prkg2, Tal1, Cav1, Pde2a, Pik3r1, Nr3c2, Trhr, Aldh1a3, Hif3a, Mycn, Gpr139, Mtus2, Fgfr1, Fgfr2, Syt4, Foxp1, Ctnna1, Scube1, Jam2, Itgav, Bok, S100a10, Hsd17b4, Tenm1, Cadm3, Msc, Cadm1, Hip1, Ikzf4, Pik3r2, Fam109a, Met, Schip1, Bard1, Mgll, Prdx6, Adcy2, Grb14, Aadat, Chrna3, Cdh13, Ctbp2, Zfp423, Inhbb, Bcl2l11, Arntl, Ascl1, Ntrk2, Micu1, …
GO:0046879	0.000187953	3.73	0.999915	35	215	hormone secretion	BP	Ptger3, Slc16a1, Npy1r, Cckbr, Efna5, Htr2a, Acvr1c, Myrip, Fgfr1, Trpv6, Cacna1e, Nell2, Glul, Acvr2a, Inhbb, Arntl, Prkce, Adora1, Mcu, Pim3, Stxbp5l, Sfrp1, Rfx3, Rims2, Nnat, Vsnl1, Htr2c, Nov, Pparg, Inhba, Pex5l, Ildr2, Crhr1, Htr1a, Nr1d1
GO:0007205	0.000195805	3.71	0.99998	7	16	protein kinase C-activating G-protein coupled receptor signaling pathway	BP	F2r, Dgkb, Dgkz, Dgkh, Dgkg, Grm5, Htr1b
GO:0015085	0.000195979	3.71	0.999931	22	101	calcium ion transmembrane transporter activity	MF	Trpc6, Slc24a4, Rasa3, Cacna1i, Atp2b2, Trpv6, Trpc5, Cacna1e, Cacna1h, Itgav, Atp2a2, Grin3a, Hrh1, Mcu, Cacna2d3, Grin2a, Trpc4, Atp2b1, Il1rapl1, Grm7, Ryr3, Slc24a2
GO:0015464	0.00020248	3.69	0.999985	6	12	acetylcholine receptor activity	MF	Chrm4, Chrm3, Chrm1, Chrna3, Chrna7, Chrm2
GO:0060445	0.000214728	3.67	0.999973	8	18	branching involved in salivary gland morphogenesis	BP	Fgf10, Plxna1, Fgfr1, Fgfr2, Sema3a, Ntn4, Met, Plxnd1
GO:0050982	0.000215545	3.67	0.999957	11	36	detection of mechanical stimulus	BP	Scn1a, Htr2a, Atp2b2, Serpine2, Htr7, Piezo2, Kit, Myc, Asic2, Grm8, Pcdh15
GO:0051952	0.000217547	3.66	0.999941	15	66	regulation of amine transport	BP	Ptger3, Htr2a, Syt4, Npy2r, Chrna3, Adora1, Chrna7, Oxtr, Avpr1a, Grm7, Nr3c1, Htr2c, Syt1, Htr1b, Crhr1
GO:0019725	0.000218658	3.66	0.999872	71	571	cellular homeostasis	BP	F2r, Tgfb2, Pde4d, Slc4a7, Ptger3, Trpc6, Calb1, Slc24a4, Npy1r, Cckbr, Efna5, Htr2a, Hcrtr2, Prkg2, Cav1, Pik3r1, Ptk2b, Nr3c2, Cemip, Cacna1i, Trhr, Atp2b2, Swap70, Sgk1, Gpr6, Trpv6, Trpc5, Cacna1e, Itgav, Bok, Atp2a2, Slc30a3, Slc4a4, Npy2r, Xpr1, Itgb3, Nell2, Pik3r2, Letmd1, Prdx6, Apc, Micu1, S1pr1, Prkce, Atp1b1, Mcu, Cib2, Chrna7, Mt1, Pim3, Oxtr, Mchr1, Camk2d, Grin2a, Avpr1a, Trpc4, At…
GO:1902903	0.000224692	3.65	0.999893	38	245	regulation of supramolecular fiber organization	BP	Ctgf, Dlg1, Dlc1, Slit2, Arhgap28, Cav1, Pik3r1, Ptk2b, Prex1, Swap70, Sgk1, Inpp5k, S100a10, Pak1, Gsn, Pik3r2, Met, Twf2, Prkcd, Apc, Sema5a, Wasf1, S1pr1, Mef2c, Clu, Prkce, Arfgef1, Spire1, Chrna7, Psrc1, Cdc42ep3, Phldb2, Fmn1, Iqgap2, Ppm1e, Coro1a, Htr1a, Fgf13
GO:0098772	0.000224779	3.65	0.999852	114	1042	molecular function regulator	MF	Ctgf, Trib1, Bmp3, Tgfb2, Elmo1, Chrm4, Dlg1, Dlc1, Chml, Arhgap20, Slit2, Rasgrp1, Efna5, Arhgap29, Pkib, Rgs4, Fgf10, Arhgap28, Rasal1, Cav1, Rasa3, Pik3r1, Kcnab1, Prex1, Fndc5, Arhgef17, Rtn4r, Net1, Rtn4rl1, Nrxn3, Nts, Serpine2, Dock3, Timp3, Pik3r5, Cdkn1c, Cdk5r1, Pcsk1n, Sema3a, Pik3r2, Arhgef3, C1qtnf4, Npy, Elfn1, Ptn, Pttg1, Scn3b, Asap1, Prkcd, Rab3il1, Hsph1, Apc, Chn2, Inhbb, Lmtk2…
GO:0019956	0.000225813	3.65	0.999989	5	8	chemokine binding	MF	Itgav, Ackr1, Itgb3, Plp2, Itga4
GO:0050773	0.000226708	3.64	0.999906	29	156	regulation of dendrite development	BP	Trpc6, Prex1, Sgk1, Ptprd, Trpc5, Cux2, Csmd3, Reln, Cdk5r1, Eef2k, Ptprf, Foxo6, Met, Asap1, Chrna3, Rap2a, Ntrk2, Mef2c, Vldlr, Nlgn1, Sdk1, Ngef, Il1rapl1, Nsmf, Plk2, Nr3c1, Il1rap, Fat3, Itpka
GO:0007417	0.000232589	3.63	0.999859	80	595	central nervous system development	BP	Pgap1, Klhl1, Cited2, Pou3f1, Ptchd1, Dlc1, Slc4a7, Ptger3, Slit2, Gabra4, Efna5, Fgf10, Acan, Tal1, Aldh1a3, Mycn, Atp2b2, Rtn4r, Sez6l, Fgfr1, Fgfr2, Rtn4rl1, Ephb3, Serpine2, Foxp1, Dcc, Mkl2, Rora, Pak1, Akt3, Reln, Cdk5r1, Ptprj, Sema3a, Cntnap2, Met, Sema4c, Smarca1, Sema5a, Macrod2, Ascl1, Ntrk2, Slitrk5, S1pr1, Clu, Gas1, Zbtb16, Whrn, Id2, Cdh11, Sptbn2, Mdga1, Vldlr, Plcb1, Sox1, Unc5d,…
GO:0015079	0.000242698	3.61	0.99991	23	118	potassium ion transmembrane transporter activity	MF	Kcnf1, Hcn1, Slc24a4, Kcnab1, Kcng1, Grik3, Kcnn2, Atp1b1, Kcnip2, Kcns3, Kcnk13, Cnga4, Kcnh3, Kcnq5, Kcnd2, Kcnh5, Kcnj2, Kcnip4, Kcnh1, Slc24a2, Kcng3, Kcnk9, Grik2
GO:1901135	0.000248679	3.6	0.999846	84	779	carbohydrate derivative metabolic process	BP	Pgap1, C1galt1, Tiparp, Adcy8, Pde4d, Gcnt2, Itgb8, Ptger3, Htr2a, Sult2b1, Acan, St6gal2, Parp1, Cad, Pde2a, Ptk2b, Nme6, Galnt18, Necab3, Cemip, Dctd, Atp2b2, Ndst3, B3galt2, Hs3st5, Sulf2, St8sia2, Galntl6, Dpy19l3, Npy2r, Rora, Prps2, Uckl1, Xylt1, Prkcd, Adcy2, B3gnt2, Angpt1, Galk1, Macrod2, Adcy1, Pde3a, Mgat5, Ugp2, Arfgef1, Hs6st1, Tmem2, Sstr4, Chst1, Eno2, Atp1b1, B3gat1, St8sia5, Gucy…
GO:0045926	0.000251197	3.6	0.999894	29	182	negative regulation of growth	BP	Cited2, Tgfb2, Slit2, Nme6, Rtn4r, Smarca2, Serpine2, Foxp1, Ntn1, Pak1, Cdk5r1, Ptprj, Sema3a, Sema5a, Jarid2, Gas1, Psrc1, Sfrp1, Epha7, Rgma, Bcl6, Slit3, Tnr, Sh3bp4, Nov, Pparg, Inhba, Wt1, Fgf13
GO:0051930	0.000258646	3.59	0.999954	10	29	regulation of sensory perception of pain	BP	F2r, Cckbr, Fgfr1, Npy2r, Mgll, Adora1, Grin2a, Htr2c, Nov, Grm3
GO:0051931	0.000258646	3.59	0.999954	10	29	regulation of sensory perception	BP	F2r, Cckbr, Fgfr1, Npy2r, Mgll, Adora1, Grin2a, Htr2c, Nov, Grm3
GO:0048646	0.000267585	3.57	0.999833	88	690	anatomical structure formation involved in morphogenesis	BP	Ctgf, C1galt1, Cited2, Tgfb2, Ets2, Dusp6, Dlc1, Slit2, Calb1, Slc24a4, Fjx1, Spry1, Dusp4, Ism1, Fgf10, Tal1, Cav1, Unc5b, Ptk2b, Fzd8, Ccbe1, Aldh1a3, Hif3a, Atp2b2, Fgfr1, Fgfr2, Egr3, Ephb3, Nrxn3, Foxp1, Pmp22, Eda, Itgav, Prickle1, Prickle2, Mfge8, Rora, Prkacb, Itgb3, Reln, Cdk5r1, Traf6, Ptn, Il4ra, Sema4c, Ovol2, Sema5a, Angpt1, Cdh13, Bcl2l11, Tnrc6c, S1pr1, Mef2c, Hs6st1, Tmem2, Tgfa, …
GO:0001965	0.000270734	3.57	0.999962	8	23	G-protein alpha-subunit binding	MF	F2r, Htr2a, Rgs4, Gria1, Rgs8, Gpsm2, Crhr1, Htr1a
GO:0060402	0.000288138	3.54	0.999901	20	99	calcium ion transport into cytosol	BP	F2r, Tgfb2, Pde4d, Htr2a, Cav1, Ptk2b, Cemip, Cacna1i, Trpv6, Itgav, Itgb3, Prkce, Camk2d, Grin2a, Prkd1, Ryr3, Htr2c, Adra1a, Ramp3, Coro1a
GO:0031401	0.000288707	3.54	0.999817	93	787	positive regulation of protein modification process	BP	Ctgf, F2r, Trib1, Bmp3, Tgfb2, Gcnt2, Dlg1, Dlc1, Rbpms, Ptger3, Rasgrp1, Trpc6, Efna5, Htr2a, Fgf10, Cav1, Pik3r1, Ptk2b, Cemip, Fzd8, Arrdc4, Epha8, Fgfr1, Fgfr2, Peli2, Igfbp4, Trpc5, Dcc, Itgav, Prickle1, Pak1, Itgb3, Pik3r5, Reln, Cdk5r1, Phip, Traf6, Grm4, Met, Sema4c, Prkcd, Hsph1, Angpt1, Chrna3, Maged1, Rap2a, Acvr2a, Inhbb, Ntrk2, Gprc5b, Tnfrsf19, Clu, Prkce, Jarid2, Arfgef1, Tgfa, Ado…
GO:0045859	0.000291446	3.54	0.999831	65	505	regulation of protein kinase activity	BP	F2r, Trib1, Tgfb2, Dlg1, Dusp6, Rasgrp1, Spry1, Dusp4, Htr2a, Pkib, Fgf10, Cav1, Dusp7, Ptk2b, Cemip, Fzd8, Prex1, Rtn4r, Fgfr1, Rtn4rl1, Inpp5k, Pak1, Itgb3, Pik3r5, Reln, Cdk5r1, Ptprj, Traf6, Grm4, Met, Prkcd, Hsph1, Apc, Angpt1, Chrna3, Maged1, Gprc5b, Clu, Cblb, Tgfa, Adora1, Sash1, Chrna7, Psrc1, Vldlr, Kit, Flrt3, Nab2, Sfrp1, Magi3, Lrrtm4, Grm5, Plce1, Tnfrsf11a, Dab1, Vegfa, Lrrc4c, Ppm…
GO:0099094	0.000297299	3.53	0.999923	14	51	ligand-gated cation channel activity	MF	Rasa3, Ptk2b, Gria1, Grin3a, Grik3, Chrna3, Gria4, Chrna7, Grin2a, Gria3, Ryr3, Asic2, Kcnj2, Grik2
GO:0016782	0.000307201	3.51	0.999933	11	46	transferase activity, transferring sulfur-containing groups	MF	Hs3st1, Sult2b1, Chst15, Ndst3, Hs3st5, Hs6st1, Chst1, Wscd1, Hs6st2, Chst2, Hs6st3
GO:0015837	0.000310916	3.51	0.999912	15	68	amine transport	BP	Ptger3, Htr2a, Syt4, Npy2r, Chrna3, Adora1, Chrna7, Oxtr, Avpr1a, Grm7, Nr3c1, Htr2c, Syt1, Htr1b, Crhr1
GO:0051272	0.000311173	3.51	0.99984	45	299	positive regulation of cellular component movement	BP	F2r, Tgfb2, Gcnt2, Ptger3, Fgf10, Tacr3, Pik3r1, Ptk2b, Cemip, Prex1, Ccbe1, Swap70, Fgfr1, Itgav, Ntn1, Pak1, Itgb3, Reln, Ptprj, Sema3a, Met, Apc, Sema5a, Angpt1, Cdh13, Amotl1, S1pr1, Prkce, Sash1, Kit, Camk2d, Bcl6, Prkd1, Nsmf, Vegfa, Myc, Sema6a, Coro1a, Pdgfc, Onecut2, Stat5b, Itga4, Bmp2, Cxcl14, Ntf3
GO:0048585	0.000314353	3.5	0.999791	115	1040	negative regulation of response to stimulus	BP	Grk5, Trib1, Tgfb2, Dlg1, Dusp6, Dlc1, Ptger3, Slit2, Spry1, Dusp4, Rgs4, Fgf10, Tnn, Rasal1, Cav1, Cxxc4, Unc5b, Dusp7, Kif26a, Rasa3, Prex1, Rnf152, Nkd2, Rtn4r, BC048403, Shisa2, Mcc, Rtn4rl1, Serpine2, Sulf2, Ptprd, Ctnna1, Itgav, Inpp5k, Prickle1, Bok, Npy2r, Rora, Prkacb, Timp3, Cdk6, Ptprj, Grin3a, Phip, Ptprf, Sema3a, Xylt1, Pik3r2, Kctd13, Nlk, Met, Bicc1, Il4ra, Ovol2, Prkcd, Hsph1, Grb…
GO:0042745	0.000326051	3.49	0.999962	7	18	circadian sleep/wake cycle	BP	Ptger3, Hcrtr2, Npy2r, Htr7, Adora1, Nlgn1, Npas2
GO:0015672	0.000337443	3.47	0.999828	43	309	monovalent inorganic cation transport	BP	Slc5a3, Kcnf1, Sik1, Scn1a, Dlg1, Slc4a7, Ptger3, Hcn1, Slc24a4, Htr2a, Cav1, Ptk2b, Kcnab1, Kcng1, Sgk1, Serpine2, Neto1, Slc4a4, Akt3, Scn3b, Adora1, Kcnn2, Atp1b1, Dpp10, Plcb1, Slc20a1, Kcnip2, Ahcyl1, Neto2, Kcns3, Camk2d, Kcnk13, Kcnh3, Kcnq5, Kcnd2, Asic2, Kcnh5, Kcnj2, Kcnip4, Kcnh1, Kcng3, Kcnk9, Fgf13
GO:0030029	0.000339751	3.47	0.999798	70	520	actin filament-based process	BP	Ctgf, Tgfb2, Elmo1, Scn1a, Pde4d, Dlg1, Dlc1, Ptger3, Slit2, Efna5, Fgf10, Arhgap28, Myrip, Cav1, Pik3r1, Ptk2b, Prex1, Arhgef17, Sirpa, Swap70, Fat1, Foxp1, Ctnna1, Inpp5k, Mkl2, S100a10, Pak1, Gsn, Itgb3, Cttnbp2, Cdk5r1, Pik3r2, Kctd13, Met, Scn3b, Twf2, Prkcd, Sema5a, Wasf1, Rap2a, S1pr1, Mef2c, Prkce, Arfgef1, Spire1, Kcnn2, Msrb1, Msrb2, Cdc42ep3, Lurap1, Kit, Phldb2, Fmn1, Shroom3, Camk2d,…
GO:0043549	0.000346285		0.999794	70	555	regulation of kinase activity	BP	F2r, Trib1, Tgfb2, Dlg1, Dusp6, Rasgrp1, Spry1, Dusp4, Htr2a, Pkib, Fgf10, Cav1, Dusp7, Pik3r1, Ptk2b, Cemip, Fzd8, Prex1, Epha8, Rtn4r, Fgfr1, Rtn4rl1, Inpp5k, Pak1, Itgb3, Pik3r5, Reln, Cdk5r1, Ptprj, Traf6, Pik3r2, Grm4, Met, Prkcd, Hsph1, Apc, Angpt1, Chrna3, Maged1, Gprc5b, Clu, Cblb, Tgfa, Adora1, Sash1, Chrna7, Psrc1, Vldlr, Kit, Flrt3, Lmo4, Nab2, Sfrp1, Magi3, Lrrtm4, Grm5, Plce1, Tnfrsf…
GO:0050673	0.000354663		0.999826	39	263	epithelial cell proliferation	BP	Tgfb2, Dlg1, Fgf10, Cav1, Fgfr2, Egr3, Mcc, Igfbp4, Foxp1, Sulf2, Itgb3, Cdk6, Glul, Ptn, Ovol2, Apc, Sema5a, Maged1, Cdh13, Acvr2a, Mef2c, Gas1, Tgfa, Id2, Kit, Bmper, Eya1, Sfrp1, Prkd1, Vegfa, Myc, Nov, Fzd7, Gpx1, Ptprk, Fst, Bmp2, Nr1d1, Foxp2
GO:1903034	0.000355346		0.999875	20	106	regulation of response to wounding	BP	F2r, Ptger3, Fam46a, Cav1, Rtn4r, Rtn4rl1, Serpine2, Gsn, Ptprj, Ptprf, Xylt1, Prkcd, Ajap1, Prkce, Arfgef1, Phldb2, Rgma, Tnr, Myc, Asic2
4970	0.000364197		0.999897	15	59	Salivary secretion	KEGG	Adcy8, Chrm3, Prkg2, Atp2b2, Trpv6, Prkacb, Adcy2, Adcy1, Calm1, Atp1b1, Gucy1b3, Plcb1, Atp2b1, Ryr3, Adra1a
GO:0042802	0.000365297		0.999748	136	1323	identical protein binding	MF	Tgfb2, Abcd2, Rbpms, Thrb, Hcn1, Slit2, Rasgrp1, Slc16a1, Tnn, Prkg2, Cldn1, Cav1, Parp1, Cad, Pde2a, Nr3c2, Trhr, Aldh1a3, Dctd, Mtus2, Fgfr1, Fgfr2, Syt4, Trpv6, Foxp1, Gria1, Ctnna1, Dcc, Bok, S100a10, Hsd17b4, Slc4a4, Tenm1, Pak1, Itgb3, Cadm3, Ralyl, Grin3a, Cadm1, B2m, Hip1, Nell2, Traf6, Prps2, Ikzf4, Kctd13, Glul, Fam109a, Met, Schip1, Bard1, Mgll, Prdx6, Grb14, Apc, Rgmb, Aadat, Ncam2, G…
GO:0010810	0.00036567		0.999851	26	141	regulation of cell-substrate adhesion	BP	Gcnt2, Dlc1, Efna5, Pik3r1, Ptk2b, Prex1, Net1, S100a10, Npy2r, Itgb3, Cdk6, Ptprj, Ptn, Cdh13, Ajap1, Prkce, Npnt, Phldb2, Col26a1, Fmn1, Utrn, Bcl6, Vegfa, Edil3, Fzd7, Onecut2
GO:0008283	0.000370035		0.999745	137	1268	cell proliferation	BP	Ctgf, Fosl2, F2r, Grk5, Trib1, Cited2, Lipg, Tgfb2, Gcnt2, Dlg1, Dlc1, Thrb, Pmaip1, Slit2, Sstr2, Tes, Spry1, Cckbr, Htr2a, Fgf10, Tnn, Sstr1, Acvr1c, Tal1, Cav1, Pik3r1, Ptk2b, Nr3c2, Ptpru, Mycn, Ndrg1, Fgfr1, Fgfr2, Egr3, Efnb1, Mcc, Igfbp4, Smarca2, Serpine2, Foxp1, Sulf2, Pmp22, Ctnna1, Trpc5, Itgav, Bok, Ntn1, Pds5b, Rora, Pak1, Itgb3, Marcksl1, Cdk6, Tsc22d1, Ptprj, Phip, Ptprf, Traf6, Gl…
GO:0042476	0.000372244		0.999899	14	57	odontogenesis	BP	Slc24a4, Fgf10, Rspo2, Fgfr2, Eda, Traf6, Apc, Bcl2l11, Gas1, Itgb4, Inhba, Wnt7b, Fst, Bmp2
GO:0071294	0.000373268		0.999989	4	6	cellular response to zinc ion	BP	Glra2, Mt1, Grin2a, Glra3
GO:0060326	0.000379485		0.999857	22	127	cell chemotaxis	BP	Pde4d, Slit2, Ptk2b, Prex1, Swap70, Fgfr1, Egr3, Ptprj, Hrh1, Met, Prkcd, Sema5a, S1pr1, Mpp1, Kit, Itga9, Prkd1, Vegfa, Ephb1, Nov, Coro1a, Cxcl14
GO:0006813	0.000386784		0.999835	28	162	potassium ion transport	BP	Kcnf1, Dlg1, Ptger3, Hcn1, Slc24a4, Htr2a, Cav1, Ptk2b, Kcnab1, Kcng1, Neto1, Adora1, Kcnn2, Atp1b1, Dpp10, Kcnip2, Neto2, Kcns3, Kcnk13, Kcnh3, Kcnq5, Kcnd2, Kcnh5, Kcnj2, Kcnip4, Kcnh1, Kcng3, Kcnk9
GO:0003407	0.000404822		0.99992	10	33	neural retina development	BP	Tgfb2, Slc4a7, Hcn1, Calb1, Fjx1, Rorb, Ptn, Sdk2, Prom1, Fat3
GO:0016917	0.000419162		0.999948	7	18	GABA receptor activity	MF	Gabra4, Gabrb3, Gabrg3, Gabra1, Gabra5, Gabra2, Gabrg1
GO:0060078	0.00042272		0.999861	18	81	regulation of postsynaptic membrane potential	BP	Ptk2b, Neto1, Gria1, Npy2r, Cux2, Reln, Met, Chrna3, Mef2c, Adora1, Gabrb3, Chrna7, Nlgn1, Gabra1, Grin2a, Rims2, Kcnd2, Grik2
GO:0007214	0.000423162		0.999937	8	22	gamma-aminobutyric acid signaling pathway	BP	Gabra4, Gabrb3, Gabrg3, Gabra1, Gabra5, Gabra2, Htr4, Gabrg1
GO:0010977	0.000424607		0.999832	24	132	negative regulation of neuron projection development	BP	Slit2, Trpc6, Rtn4r, Rtn4rl1, Pmp22, Trpc5, Ntn1, Cdk5r1, B2m, Sema3a, Xylt1, Asap1, Sema5a, Nlgn1, Ntm, Vim, Epha7, Rgma, Ngef, Dab1, Plk2, Tnr, Fat3, Fgf13
GO:0005231	0.0004298		0.999915	10	33	excitatory extracellular ligand-gated ion channel activity	MF	Gria1, Grik3, Chrna3, Gria4, Glra2, Chrna7, Grin2a, Gria3, Glra3, Grik2
GO:0097529	0.00043283		0.999872	15	77	myeloid leukocyte migration	BP	Pde4d, Ptger3, Slit2, Ptk2b, Prex1, Swap70, Ptprj, Hrh1, Mpp1, Plcb1, Kit, Itga9, Vegfa, Nov, Stat5b
GO:0030815	0.000435072		0.999933	8	24	negative regulation of cAMP metabolic process	BP	Ptger3, Pde2a, Npy2r, Sstr4, Grm7, Grm8, Npr3, Htr1b
GO:0016264	0.000455091		0.999985	4	6	gap junction assembly	BP	Cav1, Ctnna1, Gjc1, Pkp2
GO:2000147	0.000460041		0.999762	43	287	positive regulation of cell motility	BP	F2r, Tgfb2, Gcnt2, Ptger3, Fgf10, Tacr3, Pik3r1, Ptk2b, Cemip, Prex1, Ccbe1, Swap70, Fgfr1, Itgav, Ntn1, Pak1, Itgb3, Reln, Ptprj, Sema3a, Met, Apc, Sema5a, Angpt1, Cdh13, Amotl1, S1pr1, Prkce, Sash1, Kit, Camk2d, Prkd1, Nsmf, Vegfa, Myc, Sema6a, Coro1a, Pdgfc, Onecut2, Itga4, Bmp2, Cxcl14, Ntf3
GO:0032101	0.000462301		0.999747	50	381	regulation of response to external stimulus	BP	F2r, Trib1, Ptger3, Slit2, Fam46a, Fgf10, Cav1, Plxna1, Pde2a, Ptk2b, Rtn4r, Swap70, Fgfr1, Rtn4rl1, Serpine2, Rora, Cdk19, Ptprj, Grin3a, Ptprf, Traf6, Sema3a, Xylt1, Met, Mgll, Prkcd, Sema5a, Cdh13, Ajap1, S1pr1, Gprc5b, Adora1, Sec14l1, Mpp1, Sash1, Chrna7, Phldb2, Rgma, Bcl6, Prkd1, Tnfrsf11a, Vegfa, Tnr, Nov, Gpx1, Asic2, Pparg, Stat5b, Cxcl14, Ntf3
GO:0051145	0.000462774		0.999888	12	46	smooth muscle cell differentiation	BP	Fgf10, Fgfr2, Smarca2, Mkl2, Mef2c, Npnt, Kit, Vegfa, Tshz3, Hey2, Wnt7b, Ntf3
GO:0050768	0.000466065		0.999775	36	234	negative regulation of neurogenesis	BP	Brinp1, Ptger3, Slit2, Trpc6, Cav1, Mycn, Rtn4r, Syt4, Rtn4rl1, Pmp22, Ctnna1, Trpc5, Ntn1, Cdk5r1, B2m, Sema3a, Xylt1, Ptn, Asap1, Sema5a, Ascl1, Id2, Nlgn1, Ntm, Vim, Epha7, Rgma, Cntn4, Ngef, Dab1, Plk2, Tnr, Nrg3, Fat3, Wnt7b, Fgf13
GO:0099095	0.000482269		0.999967	5	10	ligand-gated anion channel activity	MF	Glra2, Gabrb3, Gabra1, Gabra2, Glra3
GO:0097553	0.000491321		0.99984	17	83	calcium ion transmembrane import into cytosol	BP	F2r, Tgfb2, Pde4d, Htr2a, Ptk2b, Cemip, Trpv6, Itgav, Itgb3, Prkce, Camk2d, Grin2a, Prkd1, Ryr3, Htr2c, Ramp3, Coro1a
GO:0007271	0.000491347		0.999924	8	23	synaptic transmission, cholinergic	BP	Chrm4, Chrm3, Chrm1, Chrna3, Chrna7, Htr2c, Chrm2, Lypd1
GO:0048512	0.000495132		0.999899	10	35	circadian behavior	BP	Ptger3, Hcrtr2, Npy2r, Ankfn1, Htr7, Adora1, Id2, Nlgn1, Npas2, Kcnd2
GO:0060219	0.000511445		0.999951	6	13	camera-type eye photoreceptor cell differentiation	BP	Slc4a7, Hcn1, Rorb, Ptn, Sdk2, Prom1
GO:0060560	0.000512464		0.999758	34	203	developmental growth involved in morphogenesis	BP	Slit2, Spry1, Efna5, Fgf10, Rasal1, Plxna1, Syt17, Rtn4r, Fgfr2, Syt4, Trpc5, Ntn1, Pak1, Cdk5r1, Cadm1, Sema3a, Twf2, Mgll, Sema5a, Wasf1, S1pr1, Ahr, Flrt3, Fmn1, Sfrp1, Epha7, Rims2, Rgma, Slit3, Vegfa, Tnr, Syt1, Wnt7b, Fgf13
GO:0030800	0.0005228		0.999917	8	25	negative regulation of cyclic nucleotide metabolic process	BP	Ptger3, Pde2a, Npy2r, Sstr4, Grm7, Grm8, Npr3, Htr1b
GO:0007196	0.000523684		0.999988	4	5	adenylate cyclase-inhibiting G-protein coupled glutamate receptor signaling pathway	BP	Grm4, Grm5, Grm7, Grm8
GO:0090596	0.000540455		0.999757	30	177	sensory organ morphogenesis	BP	Cited2, Slc4a7, Hcn1, Calb1, Fjx1, Fgf10, Rorb, Aldh1a3, Tmie, Atp2b2, Fat1, Fgfr1, Fgfr2, Sobp, Ntn1, Ptn, Ntrk2, Gas1, Whrn, Sox1, Man2a1, Sdk2, Prom1, Eya1, Vegfa, Ephb1, Myc, Pou3f4, Fat3, Pcdh15
GO:0048638	0.000550071		0.999718	41	271	regulation of developmental growth	BP	Cited2, Dlg1, Dusp6, Slit2, Npy1r, Efna5, Rasal1, Plxna1, Syt17, Rtn4r, Fgfr1, Fgfr2, Syt4, Foxp1, Trpc5, Ntn1, Pak1, Cdk5r1, Sema3a, Twf2, Mgll, Sema5a, Bcl2l11, Mef2c, Jarid2, Ahr, Ybx3, Plcb1, Sfrp1, Epha7, Rims2, Rgma, Vegfa, Nr3c1, Tnr, Pls1, Syt1, Hey2, Wt1, Stat5b, Fgf13
GO:0051128	0.000554223		0.999592	196	1873	regulation of cellular component organization	BP	Ctgf, Gpr26, Tpbg, Tgfb2, Dlg1, Dlc1, Chodl, Pmaip1, Slit2, Trpc6, Slitrk4, Efna5, Pkib, Arhgap28, Cldn1, Rasal1, Tal1, Cav1, Plxna1, Parp1, Syt17, Kif26a, Pde2a, Pik3r1, Ptk2b, Nme6, Prex1, Sirpa, Rtn4r, Swap70, Fgfr1, Fgfr2, Net1, Sgk1, Syt4, Rtn4rl1, Ephb3, Igfbp4, Smarca2, Serpine2, Foxp1, Ptprd, Pmp22, Trpc5, Dcc, Igsf9, Itgav, Inpp5k, Bok, Ntn1, Mfge8, S100a10, Cux2, Pak1, Gsn, Itgb3, Csmd3…
4060	0.000564193		0.999829	15	76	Cytokine-cytokine receptor interaction	KEGG	Tgfb2, Eda, Met, Il4ra, Acvr2a, Inhbb, Tnfrsf19, Kit, Tnfrsf11a, Vegfa, Il1rap, Inhba, Pdgfc, Bmp2, Cxcl14
GO:0051961	0.000564921		0.999718	38	254	negative regulation of nervous system development	BP	Brinp1, Ptger3, Slit2, Trpc6, Cav1, Mycn, Rtn4r, Syt4, Rtn4rl1, Pmp22, Ctnna1, Trpc5, Ntn1, Prkacb, Cdk5r1, B2m, Sema3a, Xylt1, Ptn, Asap1, Sema5a, Ascl1, Id2, Mdga1, Nlgn1, Ntm, Vim, Epha7, Rgma, Cntn4, Ngef, Dab1, Plk2, Tnr, Nrg3, Fat3, Wnt7b, Fgf13
GO:0005515	0.00056691		0.999553	556	6274	protein binding	MF	Ctgf, F2r, Klhl1, Grk5, Trib1, Pdlim1, Sik1, Cited2, Adcy8, Bmp3, Nedd9, Tgfb2, Ets2, Spsb1, Abcd2, Elmo1, Chrm4, Pde4d, Dlg1, Pcdh9, Itgb8, Dusp6, Sorcs3, Dlc1, Rbpms, Chml, Slc4a7, Thrb, Ptger3, Rab3c, Hcn1, Chodl, Pmaip1, Slit2, Rasgrp1, Trpc6, Sstr2, Slc16a1, Pknox2, Tll1, Tes, Spry1, Slitrk4, Cckbr, Efna5, Htr2a, Arhgap29, Rgs4, Fgf10, Chrm3, Trim16, Tnn, Hcrtr2, Sstr1, Prkg2, Acvr1c, Acan, …
GO:0015844	0.000585001		0.999841	13	60	monoamine transport	BP	Ptger3, Htr2a, Syt4, Npy2r, Slc22a3, Slc29a4, Htr7, Chrna7, Oxtr, Syt1, Htr1b, Crhr1, Htr1a
GO:0042749	0.000585766		0.999939	6	15	regulation of circadian sleep/wake cycle	BP	Ptger3, Hcrtr2, Npy2r, Htr7, Adora1, Nlgn1
GO:0042753	0.000591023		0.999938	6	15	positive regulation of circadian rhythm	BP	Ptger3, Npy2r, Rora, Arntl, Nlgn1, Nr1d1
GO:0017095	0.000593052		1	3	3	heparan sulfate 6-O-sulfotransferase activity	MF	Hs6st1, Hs6st2, Hs6st3
GO:0060419	0.000594342		0.999813	16	72	heart growth	BP	Cited2, Tgfb2, Dusp6, Fgfr1, Fgfr2, Foxp1, Pak1, Heg1, S1pr1, Mef2c, Jarid2, Ahr, Camk2d, Nr3c1, Hey2, Wt1
GO:0019935	0.000598023		0.99982	15	67	cyclic-nucleotide-mediated signaling	BP	Adcy8, Gpr26, Pde2a, Ptk2b, Adcy2, Htr7, Pde3a, Ksr1, Gucy1b3, Rims2, Adra1a, Pex5l, Htr4, Rxfp1, Crhr1
GO:0007423	0.000598294		0.999668	51	358	sensory organ development	BP	Cited2, Tgfb2, Dlg1, Slc4a7, Hcn1, Calb1, Fjx1, Fgf10, Rorb, Aldh1a3, Tmie, Mycn, Atp2b2, Sall2, Fat1, Fgfr1, Fgfr2, Sobp, Ntn1, Cdkn1c, Ptn, Apc, Inhbb, Bcl2l11, Ascl1, Ntrk2, Gas1, Whrn, Gabrb3, Ahr, Sox1, Man2a1, Sdk2, Prom1, Vim, Bmper, Eya1, Vegfa, Ephb1, Gabra5, Myc, Hey2, Pou3f4, Fat3, Inhba, Wt1, Bmp2, Pcdh15, Cxcl14, Rcn1, Foxp2
GO:0032956	0.0006036		0.999707	35	227	regulation of actin cytoskeleton organization	BP	Ctgf, Tgfb2, Dlg1, Dlc1, Slit2, Efna5, Arhgap28, Pik3r1, Ptk2b, Prex1, Swap70, Inpp5k, S100a10, Pak1, Gsn, Itgb3, Cdk5r1, Pik3r2, Met, Twf2, Prkcd, Sema5a, Wasf1, S1pr1, Mef2c, Prkce, Arfgef1, Spire1, Cdc42ep3, Phldb2, Fmn1, Iqgap2, Ppm1e, Coro1a, Ntf3
GO:0007622	0.000616667		0.99987	10	36	rhythmic behavior	BP	Ptger3, Hcrtr2, Npy2r, Ankfn1, Htr7, Adora1, Id2, Nlgn1, Npas2, Kcnd2
GO:0060993	0.000630018		0.999819	14	59	kidney morphogenesis	BP	Dlg1, Calb1, Fgf10, Maged1, Ahr, Npnt, Fmn1, Eya1, Vegfa, Myc, Tshz3, Wt1, Wnt7b, Bmp2
GO:0044087	0.000638429		0.999594	83	682	regulation of cellular component biogenesis	BP	Ctgf, Tpbg, Dlg1, Dlc1, Slit2, Slitrk4, Efna5, Arhgap28, Cldn1, Tal1, Cav1, Parp1, Pik3r1, Ptk2b, Prex1, Swap70, Sgk1, Ephb3, Ptprd, Inpp5k, S100a10, Cux2, Pak1, Gsn, Eef2k, Ptprj, Pik3r2, Met, Asap1, Twf2, Prkcd, Apc, Wasf1, Sub1, Cbln2, Bcl2l11, Ntrk2, Lrrtm2, Slitrk5, Sdc1, S1pr1, Mef2c, Clu, Prkce, Arfgef1, Spire1, Lrrn3, Psrc1, Ahr, Mdga1, Ldlrad4, Cdc42ep3, Nlgn1, Clstn2, Kit, Phldb2, Oxtr,…
GO:0007435	0.000672517		0.999876	9	26	salivary gland morphogenesis	BP	Fgf10, Plxna1, Fgfr1, Fgfr2, Eda, Sema3a, Ntn4, Met, Plxnd1
GO:0010771	0.000688109		0.99978	16	72	negative regulation of cell morphogenesis involved in differentiation	BP	Slit2, Trpc6, Efna5, Rtn4r, Trpc5, Ntn1, Cdk5r1, Sema3a, Sema5a, Nlgn1, Epha7, Rgma, Ngef, Dab1, Tnr, Fgf13
GO:0040017	0.000697919		0.999625	45	314	positive regulation of locomotion	BP	F2r, Tgfb2, Gcnt2, Ptger3, Slit2, Fgf10, Tacr3, Pik3r1, Ptk2b, Cemip, Prex1, Ccbe1, Swap70, Fgfr1, Itgav, Ntn1, Pak1, Itgb3, Reln, Ptprj, Sema3a, Met, Apc, Sema5a, Angpt1, Cdh13, Amotl1, S1pr1, Prkce, Pcx, Sash1, Kit, Camk2d, Prkd1, Nsmf, Vegfa, Myc, Sema6a, Coro1a, Pdgfc, Onecut2, Itga4, Bmp2, Cxcl14, Ntf3
GO:0033993	0.000698258		0.999602	54	423	response to lipid	BP	Mest, Fosl2, F2r, Brinp3, Trib1, Brinp1, Tgfb2, Pde4d, Thrb, Ptger3, Sstr2, Efna5, Sstr1, Rorb, Tacr3, Cav1, Parp1, Pde2a, Pik3r1, Ptk2b, Nr3c2, Sgk1, Foxp1, Rora, Pak1, Cdk6, Traf6, Paqr7, Twf2, Adcy2, Nrip1, Inhbb, Htr7, Arntl, Ntrk2, Mef2c, Clu, Prkce, Sstr4, Sash1, Brinp2, Plcb1, Rps6ka3, Oxtr, Sfrp1, Nr0b1, Tnfrsf11a, Nr3c1, Ramp3, Pparg, Med13, Inhba, Stat5b, Nr1d1
GO:0045666	0.000701109		0.999613	49	344	positive regulation of neuron differentiation	BP	Brinp3, Brinp1, Trpc6, Efna5, Rasal1, Syt17, Ptk2b, Fgfr1, Sgk1, Syt4, Serpine2, Ptprd, Trpc5, Dcc, Ntn1, Cux2, Pak1, Reln, Eef2k, Ptprf, Foxo6, Ptn, Met, Twf2, Sema5a, Negr1, Htr7, Ascl1, Ntrk2, Enc1, Gprc5b, Mef2c, Brinp2, Vldlr, Nlgn1, Rims2, Rgma, Bcl6, Prkd1, Il1rapl1, Vwc2l, Dab1, Vegfa, Nr3c1, Il1rap, Syt1, Itpka, Bmp2, Plxnd1
GO:0032103	0.000719046		0.999715	22	133	positive regulation of response to external stimulus	BP	Ptger3, Slit2, Fgf10, Pde2a, Ptk2b, Swap70, Fgfr1, Cdk19, Ptprj, Traf6, Met, Sema5a, Cdh13, S1pr1, Gprc5b, Sash1, Prkd1, Tnfrsf11a, Vegfa, Stat5b, Cxcl14, Ntf3
GO:0045137	0.000719315		0.999709	23	131	development of primary sexual characteristics	BP	Tiparp, Cited2, Tgfb2, Itgav, Hsd17b4, Sema3a, Klhl32, Schip1, Angpt1, Nrip1, Acvr2a, Bcl2l11, Ahr, Ybx3, Kit, Lhfpl2, Sfrp1, Nr0b1, Vegfa, Inhba, Wt1, Stat5b, Fst
534	0.000721117		0.999881	8	24	Glycosaminoglycan biosynthesis - heparan sulfate / heparin	KEGG	Hs3st1, Ndst3, Hs3st5, Xylt1, Hs6st1, B3gat1, Hs6st2, Hs6st3
GO:2000027	0.000728326		0.999713	22	119	regulation of organ morphogenesis	BP	Cited2, Tgfb2, Spry1, Fgf10, Rspo2, Fgfr1, Fgfr2, Sulf2, Ntn4, Ptn, Met, Apc, Maged1, Ajap1, Eya1, Sfrp1, Vegfa, Myc, Wt1, Wnt7b, Bmp2, Foxp2
GO:0043523	0.000750856		0.999652	30	202	regulation of neuron apoptotic process	BP	F2r, Tgfb2, Pmaip1, Unc5b, Parp1, Ptk2b, Hrk, Bok, Cdk5r1, Ptprf, Vstm2l, Hsph1, Angpt1, Bcl2l11, Ascl1, Ntrk2, Mef2c, Gabrb3, Mt1, Epha7, Nsmf, Vegfa, Nr3c1, Gabra5, Gpx1, Coro1a, Fbxw7, Grik2, Cpeb4, Ntf3
GO:0060004	0.000753603		0.999899	7	17	reflex	BP	Aldh1a3, Ascl1, Npnt, Adra1a, Satb1, Pcdh15, Foxp2
GO:0043266	0.000757735		0.999765	15	69	regulation of potassium ion transport	BP	Dlg1, Ptger3, Htr2a, Cav1, Ptk2b, Kcnab1, Kcng1, Neto1, Adora1, Atp1b1, Dpp10, Kcnip2, Neto2, Kcnj2, Kcnip4
GO:0048745	0.000767798		0.999897	7	17	smooth muscle tissue development	BP	Tiparp, Dlg1, Foxp1, Schip1, Ahr, Tshz3, Foxp2
GO:2000241	0.00077048		0.999737	17	89	regulation of reproductive process	BP	Cited2, Acvr1c, Fgfr2, Cacna1h, Prkacb, Sema3a, Grb14, Apc, Inhbb, Pde3a, Rps6ka2, Plcb1, Oxtr, Lhfpl2, Sfrp1, Inhba, Wt1
GO:0005249	0.000790314		0.999754	15	68	voltage-gated potassium channel activity	MF	Kcnf1, Hcn1, Kcnab1, Kcng1, Kcnip2, Kcns3, Cnga4, Kcnh3, Kcnq5, Kcnd2, Kcnh5, Kcnj2, Kcnh1, Kcng3, Kcnk9
GO:0051338	0.000799755		0.999497	76	646	regulation of transferase activity	BP	F2r, Trib1, Tgfb2, Dlg1, Dusp6, Rasgrp1, Spry1, Dusp4, Htr2a, Pkib, Fgf10, Cav1, Dusp7, Pik3r1, Ptk2b, Cemip, Fzd8, Prex1, Arrdc4, Epha8, Rtn4r, Fgfr1, Rtn4rl1, Inpp5k, Pak1, Itgb3, Pik3r5, Reln, Cdk5r1, Ptprj, Parm1, Traf6, Pik3r2, Grm4, Met, Prkcd, Hsph1, Apc, Serinc2, Angpt1, Chrna3, Maged1, Naf1, Gprc5b, Clu, Cblb, Tgfa, Adora1, Sash1, Chrna7, Psrc1, Vldlr, Kit, Flrt3, Lmo4, Nab2, Sfrp1, Magi…
GO:0072006	0.000803315		0.999718	18	86	nephron development	BP	Dlg1, Calb1, Sulf2, Itgb3, Angpt1, Maged1, Mef2c, Ahr, Npnt, Prom1, Fmn1, Eya1, Plce1, Vegfa, Myc, Wt1, Wnt7b, Bmp2
GO:1901137	0.000810945		0.999533	54	460	carbohydrate derivative biosynthetic process	BP	Pgap1, C1galt1, Tiparp, Adcy8, Gcnt2, Ptger3, Acan, St6gal2, Parp1, Cad, Pde2a, Ptk2b, Nme6, Galnt18, Necab3, Dctd, Ndst3, B3galt2, Hs3st5, St8sia2, Galntl6, Dpy19l3, Npy2r, Prps2, Uckl1, Xylt1, Adcy2, B3gnt2, Angpt1, Adcy1, Mgat5, Arfgef1, Hs6st1, B3gat1, St8sia5, Gucy1b3, Plcb1, St8sia4, B3gnt5, Dpy19l1, Hs6st2, Grm7, Has3, Hs6st3, Cap2, Gucy2e, Htr2c, Myc, Csgalnact1, Grm8, Npr3, Htr1b, Bace2,…
GO:0043395	0.000814198		0.999911	6	14	heparan sulfate proteoglycan binding	MF	Slit2, Gpc6, Sema5a, Lrrtm4, Gpc5, Fst
GO:0007171	0.000816345		1	3	3	activation of transmembrane receptor protein tyrosine kinase activity	BP	Angpt1, Chrna3, Pdgfc
GO:0001570	0.000836141		0.999753	14	59	vasculogenesis	BP	Tiparp, Cited2, Cav1, Fgfr1, Fgfr2, Gjc1, Ptprj, Heg1, Angpt1, Ntrk2, Hey2, Wt1, Fbxw7, Wnt7b
GO:0043270	0.000841952		0.999614	29	182	positive regulation of ion transport	BP	F2r, Dlg1, Hcn1, Trpc6, Cav1, Cemip, Atp2b2, Sgk1, Syt4, Npy2r, Akt3, Reln, B2m, Chrm1, Scn3b, Prkcd, Acsl5, Adora1, Atp1b1, Plcb1, Ahcyl1, Mchr1, Avpr1a, Tnfrsf11a, Nr3c1, Htr2c, Ramp3, Asic2, Kcnj2
GO:0001642	0.000844279		1	3	3	group III metabotropic glutamate receptor activity	MF	Grm4, Grm7, Grm8
GO:0071229	0.000846275		0.999679	20	110	cellular response to acid chemical	BP	Brinp3, Brinp1, Rorb, Ptk2b, Foxp1, S100a10, Twf2, Ntrk2, Glra2, Mef2c, Prkce, Brinp2, Plcb1, Grin2a, Nsmf, Sh3bp4, Col6a1, Pdgfc, Glra3, Cpeb4
GO:0031345	0.000860248		0.999625	26	158	negative regulation of cell projection organization	BP	Slit2, Trpc6, Rtn4r, Rtn4rl1, Pmp22, Trpc5, Ntn1, Cdk5r1, B2m, Ptprf, Sema3a, Xylt1, Asap1, Prkcd, Sema5a, Nlgn1, Ntm, Vim, Epha7, Rgma, Ngef, Dab1, Plk2, Tnr, Fat3, Fgf13
GO:0046068	0.000879608		0.999789	11	39	cGMP metabolic process	BP	Adcy8, Pde2a, Ptk2b, Atp2b2, Rora, Adcy2, Adcy1, Gucy1b3, Vegfa, Gucy2e, Htr2c
GO:0050886	0.000881714		0.999784	11	44	endocrine process	BP	F2r, Fgfr1, Trpv6, Acvr2a, Inhbb, Rps6ka2, Oxtr, Avpr1a, Inhba, Pex5l, Crhr1
GO:0033564	0.000883593		0.999977	4	5	anterior/posterior axon guidance	BP	Unc5b, Dcc, Ntn1, Unc5c
GO:0005262	0.000890307		0.999684	18	86	calcium channel activity	MF	Trpc6, Slc24a4, Rasa3, Cacna1i, Trpv6, Trpc5, Cacna1e, Cacna1h, Itgav, Grin3a, Mcu, Cacna2d3, Grin2a, Trpc4, Il1rapl1, Grm7, Ryr3, Slc24a2
GO:0072358	0.00089528		0.999467	61	451	cardiovascular system development	BP	Ctgf, C1galt1, Tiparp, Cited2, Tgfb2, Slc4a7, Slit2, Ism1, Fgf10, Tal1, Cav1, Unc5b, Pde2a, Ptk2b, Fzd8, Ccbe1, Hif3a, Fgfr1, Fgfr2, Egr3, Ephb3, Nrxn3, Smarca2, Foxp1, Gjc1, Itgav, Mkl2, Prickle1, Mfge8, Rora, Itgb3, Ptprj, Ptn, Heg1, Ovol2, Sema5a, Angpt1, Cdh13, Ntrk2, Slitrk5, S1pr1, Mef2c, Hs6st1, Tmem2, Tgfa, Sash1, Chrna7, Ahr, Kit, Bmper, Eya1, Prkd1, Vegfa, Ephb1, Nov, Gpx1, Hey2, Wt1, F…
GO:0045860	0.000904083		0.999511	44	318	positive regulation of protein kinase activity	BP	F2r, Tgfb2, Dlg1, Rasgrp1, Htr2a, Fgf10, Ptk2b, Cemip, Fzd8, Fgfr1, Pak1, Itgb3, Pik3r5, Reln, Cdk5r1, Traf6, Grm4, Met, Prkcd, Hsph1, Angpt1, Chrna3, Maged1, Gprc5b, Clu, Tgfa, Adora1, Sash1, Chrna7, Psrc1, Vldlr, Kit, Nab2, Magi3, Grm5, Plce1, Tnfrsf11a, Dab1, Vegfa, Pdgfc, Fbxw7, Wnt7b, Bmp2, Ntf3
GO:0050921	0.000907161		0.999725	14	68	positive regulation of chemotaxis	BP	Slit2, Fgf10, Ptk2b, Swap70, Fgfr1, Ptprj, Met, Sema5a, Cdh13, S1pr1, Prkd1, Vegfa, Cxcl14, Ntf3
GO:0030814	0.000922522		0.99972	14	69	regulation of cAMP metabolic process	BP	Pde4d, Ptger3, Pde2a, Npy2r, Adcy2, Adcy1, Sstr4, Grm7, Cap2, Ramp3, Grm8, Npr3, Htr1b, Crhr1
GO:2000021	0.000942336		0.99961	23	134	regulation of ion homeostasis	BP	F2r, Tgfb2, Pde4d, Hcn1, Htr2a, Cav1, Parp1, Ptk2b, Cemip, Itgav, Bok, Slc30a3, Itgb3, Scn3b, Prkce, Adora1, Camk2d, Avpr1a, Prkd1, Ryr3, Htr2c, Ramp3, Coro1a
GO:0035373	0.000961488		1	3	3	chondroitin sulfate proteoglycan binding	MF	Ptprf, Ptn, Sema5a
GO:0099565	0.00096612		0.999667	17	79	chemical synaptic transmission, postsynaptic	BP	Ptk2b, Neto1, Gria1, Npy2r, Cux2, Reln, Met, Chrna3, Mef2c, Adora1, Gabrb3, Chrna7, Nlgn1, Gabra1, Grin2a, Rims2, Grik2
GO:0052652	0.000978535		0.999673	16	80	cyclic purine nucleotide metabolic process	BP	Adcy8, Ptger3, Pde2a, Ptk2b, Npy2r, Adcy2, Adcy1, Gucy1b3, Grm7, Cap2, Gucy2e, Htr2c, Grm8, Npr3, Htr1b, Crhr1
GO:0014821	0.00100567		0.99988	6	16	phasic smooth muscle contraction	BP	Dlg1, Ptger3, Sstr2, Npy1r, Kit, Tshz3
GO:0051179	0.00101139		0.9992	379	4082	localization	BP	Mest, Pgap1, Ctgf, F2r, Slc5a3, Trib1, Kcnf1, Sik1, Cited2, Stac, Tex15, Gpr26, Lipg, Tgfb2, Abcd2, Elmo1, Scn1a, Pde4d, Gcnt2, Dlg1, Osbpl3, Dlc1, Rbpms, Chml, Slc4a7, Ptger3, Rab3c, Hcn1, Pmaip1, Slit2, Rasgrp1, Trpc6, Slc24a4, Slc16a1, Gabra4, Npy1r, Spry1, Cckbr, Efna5, Htr2a, Fgf10, Chrm3, Trim16, Tnn, Prkg2, Acvr1c, Acan, Tacr3, Cldn1, Myrip, Cav1, Matn2, Plxna1, Parp1, Shisa9, Syt17, Neurl…
GO:0071363	0.00104597		0.999396	53	391	cellular response to growth factor stimulus	BP	Ctgf, Cited2, Bmp3, Tgfb2, Gcnt2, Dusp6, Slit2, Spry1, Fgf10, Acvr1c, Cav1, Parp1, Ccbe1, Fgfr1, Fgfr2, Egr3, Shisa2, Sulf2, Inpp5k, Itgb3, Ptprf, Nlk, Twf2, Rgmb, Angpt1, Wasf1, Bambi, Acvr2a, Zfp423, Lmtk2, Mef2c, Prkce, Npnt, Ldlrad4, Vstm2a, Flrt3, Adamts3, Bmper, Sfrp1, Tgfb1i1, Rgma, Prkd1, Vwc2l, Vegfa, Nr3c1, Coro1a, Onecut2, Ptprk, Dok5, Stat5b, Fst, Bmp2, Flrt2
GO:0022410	0.00105578		0.999872	6	16	circadian sleep/wake cycle process	BP	Ptger3, Hcrtr2, Npy2r, Htr7, Adora1, Nlgn1
GO:0030432	0.00107492		0.999947	4	7	peristalsis	BP	Dlg1, Sstr2, Npy1r, Tshz3
GO:0006796	0.00108931		0.999179	209	2119	phosphate-containing compound metabolic process	BP	Pgap1, Ctgf, F2r, Grk5, Trib1, Sik1, Adcy8, Bmp3, Tgfb2, Pde4d, Gcnt2, Dlg1, Hunk, Dusp6, Dlc1, Rbpms, Ptger3, Slit2, Rasgrp1, Trpc6, Spry1, Cckbr, Efna5, Dusp4, Htr2a, Sult2b1, Pkib, Fgf10, Prkg2, Acvr1c, Cav1, Parp1, Cad, Dusp7, Pde2a, Pik3r1, Ptk2b, Nme6, Isyna1, Ptpru, Cemip, Fzd8, Prex1, Dctd, Atp2b2, Dok4, Epha8, Rtn4r, Swap70, Fgfr1, Fgfr2, Peli2, Sgk1, Rtn4rl1, Ephb3, Igfbp4, Ptprd, Trpc5…
GO:0009190	0.00110381		0.999626	16	81	cyclic nucleotide biosynthetic process	BP	Adcy8, Ptger3, Pde2a, Ptk2b, Npy2r, Adcy2, Adcy1, Gucy1b3, Grm7, Cap2, Gucy2e, Htr2c, Grm8, Npr3, Htr1b, Crhr1
GO:0030809	0.00111029		0.999797	8	27	negative regulation of nucleotide biosynthetic process	BP	Ptger3, Parp1, Pde2a, Npy2r, Grm7, Grm8, Npr3, Htr1b
GO:1900372	0.00111029		0.999797	8	27	negative regulation of purine nucleotide biosynthetic process	BP	Ptger3, Parp1, Pde2a, Npy2r, Grm7, Grm8, Npr3, Htr1b
GO:0110053	0.00112252		0.999475	29	184	regulation of actin filament organization	BP	Ctgf, Dlg1, Dlc1, Slit2, Arhgap28, Pik3r1, Ptk2b, Prex1, Swap70, Inpp5k, S100a10, Pak1, Gsn, Pik3r2, Met, Twf2, Prkcd, Sema5a, Wasf1, S1pr1, Prkce, Arfgef1, Spire1, Cdc42ep3, Phldb2, Fmn1, Iqgap2, Ppm1e, Coro1a
GO:0030799	0.00113302		0.999614	16	83	regulation of cyclic nucleotide metabolic process	BP	Pde4d, Ptger3, Pde2a, Ptk2b, Npy2r, Adcy2, Adcy1, Sstr4, Grm7, Vegfa, Cap2, Ramp3, Grm8, Npr3, Htr1b, Crhr1
GO:0008406	0.00114131		0.999531	22	128	gonad development	BP	Tiparp, Cited2, Tgfb2, Itgav, Hsd17b4, Sema3a, Klhl32, Schip1, Angpt1, Nrip1, Acvr2a, Bcl2l11, Ahr, Ybx3, Kit, Sfrp1, Nr0b1, Vegfa, Inhba, Wt1, Stat5b, Fst
GO:0030335	0.00116866		0.999375	41	281	positive regulation of cell migration	BP	F2r, Tgfb2, Gcnt2, Ptger3, Fgf10, Pik3r1, Ptk2b, Cemip, Prex1, Ccbe1, Swap70, Fgfr1, Itgav, Pak1, Itgb3, Reln, Ptprj, Sema3a, Met, Apc, Sema5a, Angpt1, Cdh13, Amotl1, S1pr1, Prkce, Sash1, Kit, Camk2d, Prkd1, Nsmf, Vegfa, Myc, Sema6a, Coro1a, Pdgfc, Onecut2, Itga4, Bmp2, Cxcl14, Ntf3
GO:0051932	0.00117666		0.999703	11	42	synaptic transmission, GABAergic	BP	Cckbr, Pak1, Prkce, Adora1, Gabrb3, Nlgn1, Oxtr, Cntnap4, Gabra1, Adra1a, Htr1b
GO:0055117	0.00117911		0.999679	12	48	regulation of cardiac muscle contraction	BP	Ctgf, Pde4d, Dlg1, Cav1, Atp2a2, Smtn, Adora1, Atp1b1, Adra1a, Pkp2, Kcnj2, Fgf13
GO:0070405	0.00117937		0.999722	10	41	ammonium ion binding	MF	Rasgrp1, Htr2a, Chrm3, Hrh1, Chrna3, Htr7, Chrna7, Htr2c, Htr1b, Htr1a
GO:0030165	0.00118041		0.999542	20	102	PDZ domain binding	MF	Dlg1, Sstr2, Arhgap29, Cxxc4, Shisa9, Fzd8, Atp2b2, Lin7b, Gria1, Cadm1, Acvr2a, Synj2, Nlgn1, Sntg2, Gria3, Atp2b1, Grm7, Fzd7, Ccdc88c, Grik2
GO:0006793	0.00118859		0.999101	212	2162	phosphorus metabolic process	BP	Pgap1, Ctgf, F2r, Grk5, Trib1, Sik1, Adcy8, Bmp3, Tgfb2, Pde4d, Gcnt2, Dlg1, Hunk, Dusp6, Dlc1, Rbpms, Ptger3, Slit2, Rasgrp1, Trpc6, Spry1, Cckbr, Efna5, Dusp4, Htr2a, Sult2b1, Pkib, Fgf10, Prkg2, Acvr1c, Cav1, Parp1, Cad, Dusp7, Pde2a, Pik3r1, Ptk2b, Nme6, Isyna1, Ptpru, Cemip, Fzd8, Prex1, Dctd, Atp2b2, Dok4, Epha8, Rtn4r, Swap70, Fgfr1, Fgfr2, Peli2, Sgk1, Rtn4rl1, Ephb3, Igfbp4, Ptprd, Trpc5…
GO:0051347	0.00122739		0.999285	53	416	positive regulation of transferase activity	BP	F2r, Trib1, Tgfb2, Dlg1, Rasgrp1, Htr2a, Pkib, Fgf10, Ptk2b, Cemip, Fzd8, Arrdc4, Epha8, Fgfr1, Pak1, Itgb3, Pik3r5, Reln, Cdk5r1, Parm1, Traf6, Grm4, Met, Prkcd, Hsph1, Serinc2, Angpt1, Chrna3, Maged1, Naf1, Gprc5b, Clu, Tgfa, Adora1, Sash1, Chrna7, Psrc1, Vldlr, Kit, Lmo4, Nab2, Magi3, Grm5, Plce1, Tnfrsf11a, Dab1, Vegfa, Myc, Pdgfc, Fbxw7, Wnt7b, Bmp2, Ntf3
GO:0005003	0.00123437		0.999859	6	13	ephrin receptor activity	MF	Epha8, Ephb3, Ephb6, Epha7, Epha6, Ephb1
GO:0010811	0.00125484		0.999553	17	86	positive regulation of cell-substrate adhesion	BP	Ptk2b, Prex1, Net1, S100a10, Npy2r, Itgb3, Cdk6, Ptprj, Ptn, Cdh13, Prkce, Npnt, Col26a1, Fmn1, Utrn, Vegfa, Edil3
GO:0019838	0.00127393		0.999528	18	97	growth factor binding	MF	Ctgf, Trim16, Acvr1c, Nkd2, Fgfr1, Fgfr2, Igfbp4, Itgav, Itgb3, Ptn, Acvr2a, Ntrk2, Pcsk6, Itgb4, Vegfa, Nov, Col6a1, Ntf3
GO:0050678	0.00128197		0.999369	32	215	regulation of epithelial cell proliferation	BP	Tgfb2, Dlg1, Fgf10, Cav1, Fgfr2, Egr3, Mcc, Foxp1, Sulf2, Itgb3, Cdk6, Glul, Ptn, Ovol2, Apc, Sema5a, Maged1, Cdh13, Mef2c, Gas1, Tgfa, Eya1, Sfrp1, Prkd1, Vegfa, Myc, Fzd7, Gpx1, Ptprk, Bmp2, Nr1d1, Foxp2
GO:0060322	0.00128628		0.999208	65	489	head development	BP	Pgap1, Klhl1, Tiparp, Pou3f1, Tgfb2, Ptchd1, Dlc1, Slc4a7, Ptger3, Slit2, Efna5, Fgf10, Aldh1a3, Atp2b2, Rtn4r, Sez6l, Fgfr1, Fgfr2, Rtn4rl1, Ephb3, Serpine2, Mkl2, Rora, Pak1, Akt3, Reln, Cdk5r1, Sema3a, Cntnap2, Met, Schip1, Sema4c, Smarca1, Sema5a, Macrod2, Ascl1, Ntrk2, Slitrk5, S1pr1, Gas1, Whrn, Id2, Sptbn2, Mdga1, Plcb1, Sox1, Flrt3, Pcdh19, Crtac1, Sfrp1, Epha7, Nnat, Dab1, Unc5c, Btbd3, …
GO:0003156	0.00128771		0.999797	7	21	regulation of animal organ formation	BP	Cited2, Spry1, Fgf10, Fgfr1, Eya1, Wt1, Bmp2
GO:0007320	0.0012884		0.999933	4	7	insemination	BP	Serpine2, Acvr2a, Oxtr, Avpr1a
GO:0004994	0.00129478		0.999976	3	4	somatostatin receptor activity	MF	Sstr2, Sstr1, Sstr4
GO:0004714	0.00129538		0.999676	11	37	transmembrane receptor protein tyrosine kinase activity	MF	Epha8, Fgfr1, Fgfr2, Ephb3, Met, Ntrk2, Ephb6, Kit, Epha7, Epha6, Ephb1
GO:0007431	0.00132577		0.999723	9	29	salivary gland development	BP	Fgf10, Plxna1, Fgfr1, Fgfr2, Eda, Sema3a, Ntn4, Met, Plxnd1
GO:0071396	0.0013336		0.999279	41	303	cellular response to lipid	BP	Brinp3, Trib1, Brinp1, Pde4d, Thrb, Ptger3, Sstr2, Efna5, Sstr1, Rorb, Parp1, Pde2a, Ptk2b, Nr3c2, Sgk1, Foxp1, Rora, Pak1, Cdk6, Traf6, Twf2, Adcy2, Nrip1, Inhbb, Arntl, Ntrk2, Mef2c, Clu, Prkce, Sstr4, Sash1, Brinp2, Plcb1, Sfrp1, Nr0b1, Nr3c1, Ramp3, Pparg, Med13, Inhba, Nr1d1
GO:0001944	0.00135134		0.999187	59	440	vasculature development	BP	Ctgf, C1galt1, Tiparp, Cited2, Tgfb2, Slc4a7, Slit2, Ism1, Fgf10, Tal1, Cav1, Unc5b, Pde2a, Ptk2b, Fzd8, Ccbe1, Hif3a, Fgfr1, Fgfr2, Egr3, Ephb3, Nrxn3, Smarca2, Gjc1, Itgav, Mkl2, Prickle1, Mfge8, Rora, Itgb3, Ptprj, Ptn, Heg1, Ovol2, Sema5a, Angpt1, Cdh13, Ntrk2, S1pr1, Mef2c, Hs6st1, Tmem2, Tgfa, Sash1, Chrna7, Ahr, Kit, Bmper, Eya1, Prkd1, Vegfa, Ephb1, Nov, Gpx1, Hey2, Wt1, Fbxw7, Wnt7b, Plx…
GO:0007548	0.00136007		0.999386	26	159	sex differentiation	BP	Tiparp, Cited2, Tex15, Tgfb2, Fgf10, Itgav, Hsd17b4, Sema3a, Klhl32, Schip1, Angpt1, Nrip1, Acvr2a, Bcl2l11, Srd5a1, Ahr, Ybx3, Kit, Lhfpl2, Sfrp1, Nr0b1, Vegfa, Inhba, Wt1, Stat5b, Fst
GO:0033688	0.00136293		0.99979	7	19	regulation of osteoblast proliferation	BP	Tnn, Itgav, Itgb3, Sfrp1, Nell1, Npr3, Bmp2
GO:2001028	0.00136597		0.999876	5	11	positive regulation of endothelial cell chemotaxis	BP	Fgfr1, Met, Sema5a, Prkd1, Vegfa
GO:0001525	0.00136923		0.999261	41	283	angiogenesis	BP	Ctgf, C1galt1, Slit2, Ism1, Tal1, Cav1, Unc5b, Ptk2b, Fzd8, Ccbe1, Hif3a, Fgfr1, Fgfr2, Egr3, Ephb3, Nrxn3, Itgav, Mfge8, Rora, Itgb3, Ptn, Ovol2, Sema5a, Angpt1, Cdh13, S1pr1, Hs6st1, Tmem2, Tgfa, Sash1, Chrna7, Ahr, Bmper, Prkd1, Vegfa, Ephb1, Nov, Gpx1, Fbxw7, Wnt7b, Plxnd1
GO:0007631	0.001373		0.999543	15	76	feeding behavior	BP	Npy1r, Hcrtr2, Tacr3, Npy2r, Npy, Negr1, Phf21a, Ntrk2, Oxtr, Mchr1, Grm7, Htr2c, Htr1b, Crhr1, Htr1a
GO:0050433	0.00138361		0.999697	9	36	regulation of catecholamine secretion	BP	Ptger3, Htr2a, Syt4, Npy2r, Chrna7, Oxtr, Syt1, Htr1b, Crhr1
GO:0015077	0.00139152		0.99931	32	228	monovalent inorganic cation transmembrane transporter activity	MF	Kcnf1, Scn1a, Slc4a7, Hcn1, Slc24a4, Kcnab1, Cacna1i, Kcng1, Cacna1h, Slc4a4, Grik3, Scn3b, Slc6a6, Kcnn2, Atp1b1, Slc20a1, Kcnip2, Kcns3, Kcnk13, Cnga4, Kcnh3, Kcnq5, Kcnd2, Asic2, Kcnh5, Kcnj2, Kcnip4, Kcnh1, Slc24a2, Kcng3, Kcnk9, Grik2
GO:0071371	0.00140854		0.999878	5	10	cellular response to gonadotropin stimulus	BP	Efna5, Epha8, Nsmf, Inhba, Wt1
GO:0050790	0.00142875		0.998979	133	1264	regulation of catalytic activity	BP	Ctgf, F2r, Trib1, Tgfb2, Dlg1, Dusp6, Dlc1, Pmaip1, Rasgrp1, Spry1, Efna5, Dusp4, Htr2a, Pkib, Rgs4, Fgf10, Acvr1c, Rasal1, Cav1, Parp1, Dusp7, Rasa3, Capn1, Pik3r1, Ptk2b, Cemip, Fzd8, Prex1, Arrdc4, Epha8, Rtn4r, Fgfr1, Fgfr2, Net1, Rtn4rl1, Ephb3, Serpine2, Inpp5k, Bok, S100a10, Pak1, Timp3, Gsn, Itgb3, Pik3r5, Reln, Cdk5r1, Ptprj, Parm1, Hip1, Traf6, Pcsk1n, Pik3r2, Elfn1, Grm4, Met, Prkcd, H…
GO:0051209	0.00143512		0.999543	14	68	release of sequestered calcium ion into cytosol	BP	F2r, Tgfb2, Pde4d, Htr2a, Ptk2b, Cemip, Itgav, Itgb3, Prkce, Camk2d, Prkd1, Ryr3, Htr2c, Coro1a
GO:0051283	0.00143512		0.999543	14	68	negative regulation of sequestering of calcium ion	BP	F2r, Tgfb2, Pde4d, Htr2a, Ptk2b, Cemip, Itgav, Itgb3, Prkce, Camk2d, Prkd1, Ryr3, Htr2c, Coro1a
GO:0019933	0.00145461		0.999562	13	59	cAMP-mediated signaling	BP	Adcy8, Gpr26, Pde2a, Adcy2, Htr7, Pde3a, Ksr1, Rims2, Adra1a, Pex5l, Htr4, Rxfp1, Crhr1
[truncated: 8,000 more rows]
