# Supplementary material for: Cohesin-dependence of neuronal gene expression relates to chromatin loop length
Source: eLife. 2022 Apr 26;11:e76539. doi: 10.7554/eLife.76539 (PMC9106336; doi:10.7554/eLife.76539)
Supplement: Supplementary file 4. [file elife-76539-supp4.xlsx]

## Sheet: Sheet1
Supplementary Data 4.
RNAseq RAD21TEV 4OHT vs EtOH
ensembl_id	log2FoldChange	lfcSE	stat	pvalue	padj	mgi_symbol
ENSMUSG00000044071	-2.22007	0.136496	-16.2647	1.75728e-59	3.09054e-55	Fam19a2
ENSMUSG00000048107	-1.81662	0.131503	-13.8143	2.09107e-43	1.83878e-39	Kctd12
ENSMUSG00000013846	-2.59329	0.208865	-12.4161	2.13653e-35	1.2525e-31	St3gal1
ENSMUSG00000053846	-2.85827	0.282091	-10.1324	3.96614e-24	1.74381e-20	Lipg
ENSMUSG00000028086	-1.18265	0.118739	-9.96009	2.27864e-23	8.01487e-20	Fbxw7
ENSMUSG00000046387	-1.36712	0.141978	-9.62908	6.02642e-22	1.76644e-18	Pcdhb17
ENSMUSG00000046191	-1.32879	0.142189	-9.34523	9.16877e-21	2.30359e-17	Pcdhb20
ENSMUSG00000022346	-1.65693	0.178037	-9.30667	1.31907e-20	2.70829e-17	Myc
ENSMUSG00000024647	-1.43629	0.154417	-9.30141	1.38594e-20	2.70829e-17	Cbln2
ENSMUSG00000028222	-2.83408	0.311995	-9.08373	1.04914e-19	1.84513e-16	Calb1
ENSMUSG00000035274	-2.23207	0.250001	-8.92824	4.3285e-19	6.92048e-16	Tpbg
ENSMUSG00000032537	-1.53708	0.172775	-8.89642	5.76766e-19	8.45298e-16	Ephb1
ENSMUSG00000067028	-2.06039	0.233723	-8.8155	1.19154e-18	1.61197e-15	Cntnap5b
ENSMUSG00000045994	-1.07846	0.122933	-8.77278	1.74307e-18	2.18966e-15	B3gat1
ENSMUSG00000025790	-1.36938	0.160661	-8.52341	1.54919e-17	1.81638e-14	Slco3a1
ENSMUSG00000036902	-1.57248	0.18718	-8.40088	4.43156e-17	4.87112e-14	Neto2
ENSMUSG00000005198	1.03399	0.123249	8.38948	4.88278e-17	5.05138e-14	Polr2a
ENSMUSG00000022206	-1.97806	0.237924	-8.31386	9.26416e-17	9.0516e-14	Npr3
ENSMUSG00000091969	-1.03288	0.125091	-8.25706	1.49299e-16	1.38196e-13	Pcdha3
ENSMUSG00000047910	-1.39541	0.169993	-8.20864	2.23704e-16	1.96714e-13	Pcdhb16
ENSMUSG00000043067	-1.04715	0.127952	-8.1839	2.74799e-16	2.30137e-13	Dpy19l1
ENSMUSG00000026259	-1.27142	0.156281	-8.13545	4.10409e-16	3.28085e-13	Ngef
ENSMUSG00000024211	-2.39267	0.296109	-8.08038	6.45634e-16	4.93686e-13	Grm8
ENSMUSG00000030518	-1.55056	0.193147	-8.02786	9.91852e-16	7.26821e-13	Fam189a1
ENSMUSG00000029135	-2.5261	0.316498	-7.98139	1.44694e-15	1.01789e-12	Fosl2
ENSMUSG00000025089	-2.95914	0.371824	-7.95844	1.74225e-15	1.1785e-12	Gfra1
ENSMUSG00000021614	-2.09126	0.265338	-7.8815	3.23487e-15	2.03184e-12	Vcan
ENSMUSG00000043313	-1.38338	0.175422	-7.88601	3.1199e-15	2.03184e-12	Pcdhb19
ENSMUSG00000036782	-1.05741	0.134969	-7.83449	4.70758e-15	2.8549e-12	Klhl13
ENSMUSG00000058152	-1.53937	0.197638	-7.78884	6.76292e-15	3.96465e-12	Chsy3
ENSMUSG00000052581	-1.9066	0.248361	-7.67673	1.63195e-14	9.25842e-12	Lrrtm4
ENSMUSG00000022231	-1.76139	0.232978	-7.56033	4.02037e-14	2.20957e-11	Sema5a
ENSMUSG00000058248	-1.67966	0.222932	-7.53444	4.90438e-14	2.61374e-11	Kcnh1
ENSMUSG00000091002	-1.5199	0.204116	-7.44626	9.60248e-14	4.96702e-11	Tcerg1l
ENSMUSG00000061353	-3.11316	0.419013	-7.42974	1.08811e-13	5.46762e-11	Cxcl12
ENSMUSG00000073591	-1.43428	0.193458	-7.41394	1.22602e-13	5.94585e-11	Pcdhb22
ENSMUSG00000075012	-1.40826	0.190016	-7.41128	1.2509e-13	5.94585e-11	Fjx1
ENSMUSG00000039683	-1.40762	0.191328	-7.35708	1.87974e-13	8.69971e-11	Sdk1
ENSMUSG00000041046	-2.39718	0.330655	-7.24977	4.17465e-13	1.8721e-10	Ramp3
ENSMUSG00000054204	-4.11839	0.568281	-7.2471	4.25791e-13	1.8721e-10	Fam150b
ENSMUSG00000019889	-1.48596	0.210235	-7.06809	1.57079e-12	6.73791e-10	Ptprk
ENSMUSG00000024261	-1.22629	0.175131	-7.00212	2.52115e-12	1.0557e-09	Syt4
ENSMUSG00000055409	-2.02431	0.289611	-6.98974	2.75388e-12	1.12634e-09	Nell1
ENSMUSG00000039959	-0.671305	0.0966443	-6.94614	3.75409e-12	1.50053e-09	Hip1
ENSMUSG00000019943	-0.530691	0.0766639	-6.9223	4.4436e-12	1.73666e-09	Atp2b1
ENSMUSG00000027674	-1.64201	0.237738	-6.90683	4.95593e-12	1.89478e-09	Pex5l
ENSMUSG00000033849	-1.94426	0.28215	-6.89087	5.54507e-12	2.07492e-09	B3galt2
ENSMUSG00000007440	-0.464475	0.0677376	-6.85697	7.0336e-12	2.57708e-09	Pcdha9
ENSMUSG00000007440	-0.464475	0.0677376	-6.85697	7.0336e-12	2.57708e-09	Pcdha5
ENSMUSG00000007440	-0.464475	0.0677376	-6.85697	7.0336e-12	2.57708e-09	Pcdha4
ENSMUSG00000007440	-0.464475	0.0677376	-6.85697	7.0336e-12	2.57708e-09	Pcdhac1
ENSMUSG00000007440	-0.464475	0.0677376	-6.85697	7.0336e-12	2.57708e-09	Pcdha2
ENSMUSG00000007440	-0.464475	0.0677376	-6.85697	7.0336e-12	2.57708e-09	Pcdha10
ENSMUSG00000007440	-0.464475	0.0677376	-6.85697	7.0336e-12	2.57708e-09	Pcdha4
ENSMUSG00000007440	-0.464475	0.0677376	-6.85697	7.0336e-12	2.57708e-09	Pcdha4
ENSMUSG00000007440	-0.464475	0.0677376	-6.85697	7.0336e-12	2.57708e-09	Pcdha9
ENSMUSG00000007440	-0.464475	0.0677376	-6.85697	7.0336e-12	2.57708e-09	Pcdha1
ENSMUSG00000007440	-0.464475	0.0677376	-6.85697	7.0336e-12	2.57708e-09	Pcdha12
ENSMUSG00000007440	-0.464475	0.0677376	-6.85697	7.0336e-12	2.57708e-09	Pcdhac2
ENSMUSG00000007440	-0.464475	0.0677376	-6.85697	7.0336e-12	2.57708e-09	Pcdha5
ENSMUSG00000007440	-0.464475	0.0677376	-6.85697	7.0336e-12	2.57708e-09	Pcdha1
ENSMUSG00000007440	-0.464475	0.0677376	-6.85697	7.0336e-12	2.57708e-09	Pcdha1
ENSMUSG00000007440	-0.464475	0.0677376	-6.85697	7.0336e-12	2.57708e-09	Pcdha4
ENSMUSG00000007440	-0.464475	0.0677376	-6.85697	7.0336e-12	2.57708e-09	Pcdha12
ENSMUSG00000007440	-0.464475	0.0677376	-6.85697	7.0336e-12	2.57708e-09	Pcdha5
ENSMUSG00000007440	-0.464475	0.0677376	-6.85697	7.0336e-12	2.57708e-09	Pcdhac2
ENSMUSG00000007440	-0.464475	0.0677376	-6.85697	7.0336e-12	2.57708e-09	Pcdha2
ENSMUSG00000007440	-0.464475	0.0677376	-6.85697	7.0336e-12	2.57708e-09	Pcdha9
ENSMUSG00000007440	-0.464475	0.0677376	-6.85697	7.0336e-12	2.57708e-09	Pcdha9
ENSMUSG00000007440	-0.464475	0.0677376	-6.85697	7.0336e-12	2.57708e-09	Pcdha9
ENSMUSG00000007440	-0.464475	0.0677376	-6.85697	7.0336e-12	2.57708e-09	Pcdha5
ENSMUSG00000007440	-0.464475	0.0677376	-6.85697	7.0336e-12	2.57708e-09	Pcdha1
ENSMUSG00000007440	-0.464475	0.0677376	-6.85697	7.0336e-12	2.57708e-09	Pcdha10
ENSMUSG00000007440	-0.464475	0.0677376	-6.85697	7.0336e-12	2.57708e-09	Pcdha1
ENSMUSG00000007440	-0.464475	0.0677376	-6.85697	7.0336e-12	2.57708e-09	Pcdha4
ENSMUSG00000007440	-0.464475	0.0677376	-6.85697	7.0336e-12	2.57708e-09	Pcdha4
ENSMUSG00000007440	-0.464475	0.0677376	-6.85697	7.0336e-12	2.57708e-09	Pcdha2
ENSMUSG00000007440	-0.464475	0.0677376	-6.85697	7.0336e-12	2.57708e-09	Pcdha12
ENSMUSG00000007440	-0.464475	0.0677376	-6.85697	7.0336e-12	2.57708e-09	Pcdha5
ENSMUSG00000007440	-0.464475	0.0677376	-6.85697	7.0336e-12	2.57708e-09	Pcdha9
ENSMUSG00000007440	-0.464475	0.0677376	-6.85697	7.0336e-12	2.57708e-09	Pcdha9
ENSMUSG00000007440	-0.464475	0.0677376	-6.85697	7.0336e-12	2.57708e-09	Pcdha2
ENSMUSG00000007440	-0.464475	0.0677376	-6.85697	7.0336e-12	2.57708e-09	Pcdha4
ENSMUSG00000007440	-0.464475	0.0677376	-6.85697	7.0336e-12	2.57708e-09	Pcdha1
ENSMUSG00000007440	-0.464475	0.0677376	-6.85697	7.0336e-12	2.57708e-09	Pcdha10
ENSMUSG00000007440	-0.464475	0.0677376	-6.85697	7.0336e-12	2.57708e-09	Pcdha10
ENSMUSG00000007440	-0.464475	0.0677376	-6.85697	7.0336e-12	2.57708e-09	Pcdha2
ENSMUSG00000007440	-0.464475	0.0677376	-6.85697	7.0336e-12	2.57708e-09	Pcdha5
ENSMUSG00000007440	-0.464475	0.0677376	-6.85697	7.0336e-12	2.57708e-09	Pcdha2
ENSMUSG00000007440	-0.464475	0.0677376	-6.85697	7.0336e-12	2.57708e-09	Pcdha2
ENSMUSG00000007440	-0.464475	0.0677376	-6.85697	7.0336e-12	2.57708e-09	Pcdha12
ENSMUSG00000007440	-0.464475	0.0677376	-6.85697	7.0336e-12	2.57708e-09	Pcdha2
ENSMUSG00000007440	-0.464475	0.0677376	-6.85697	7.0336e-12	2.57708e-09	Pcdhac2
ENSMUSG00000007440	-0.464475	0.0677376	-6.85697	7.0336e-12	2.57708e-09	Pcdhac2
ENSMUSG00000007440	-0.464475	0.0677376	-6.85697	7.0336e-12	2.57708e-09	Pcdha9
ENSMUSG00000007440	-0.464475	0.0677376	-6.85697	7.0336e-12	2.57708e-09	Pcdhac1
ENSMUSG00000007440	-0.464475	0.0677376	-6.85697	7.0336e-12	2.57708e-09	Pcdhac2
ENSMUSG00000007440	-0.464475	0.0677376	-6.85697	7.0336e-12	2.57708e-09	Pcdha9
ENSMUSG00000007440	-0.464475	0.0677376	-6.85697	7.0336e-12	2.57708e-09	Pcdha1
ENSMUSG00000007440	-0.464475	0.0677376	-6.85697	7.0336e-12	2.57708e-09	Pcdha1
ENSMUSG00000007440	-0.464475	0.0677376	-6.85697	7.0336e-12	2.57708e-09	Pcdha11
ENSMUSG00000007440	-0.464475	0.0677376	-6.85697	7.0336e-12	2.57708e-09	Pcdha5
ENSMUSG00000007440	-0.464475	0.0677376	-6.85697	7.0336e-12	2.57708e-09	Pcdha5
ENSMUSG00000007440	-0.464475	0.0677376	-6.85697	7.0336e-12	2.57708e-09	Pcdha12
ENSMUSG00000007440	-0.464475	0.0677376	-6.85697	7.0336e-12	2.57708e-09	Pcdha12
ENSMUSG00000007440	-0.464475	0.0677376	-6.85697	7.0336e-12	2.57708e-09	Pcdha1
ENSMUSG00000007440	-0.464475	0.0677376	-6.85697	7.0336e-12	2.57708e-09	Pcdhac2
ENSMUSG00000007440	-0.464475	0.0677376	-6.85697	7.0336e-12	2.57708e-09	Pcdhac2
ENSMUSG00000007440	-0.464475	0.0677376	-6.85697	7.0336e-12	2.57708e-09	Pcdhac1
ENSMUSG00000007440	-0.464475	0.0677376	-6.85697	7.0336e-12	2.57708e-09	Pcdhac2
ENSMUSG00000007440	-0.464475	0.0677376	-6.85697	7.0336e-12	2.57708e-09	Pcdha10
ENSMUSG00000007440	-0.464475	0.0677376	-6.85697	7.0336e-12	2.57708e-09	Pcdhac1
ENSMUSG00000007440	-0.464475	0.0677376	-6.85697	7.0336e-12	2.57708e-09	Pcdhac2
ENSMUSG00000007440	-0.464475	0.0677376	-6.85697	7.0336e-12	2.57708e-09	Pcdha2
ENSMUSG00000007440	-0.464475	0.0677376	-6.85697	7.0336e-12	2.57708e-09	Pcdha4
ENSMUSG00000007440	-0.464475	0.0677376	-6.85697	7.0336e-12	2.57708e-09	Pcdha5
ENSMUSG00000007440	-0.464475	0.0677376	-6.85697	7.0336e-12	2.57708e-09	Pcdha11
ENSMUSG00000007440	-0.464475	0.0677376	-6.85697	7.0336e-12	2.57708e-09	Pcdhac1
ENSMUSG00000007440	-0.464475	0.0677376	-6.85697	7.0336e-12	2.57708e-09	Pcdha12
ENSMUSG00000007440	-0.464475	0.0677376	-6.85697	7.0336e-12	2.57708e-09	Pcdha4
ENSMUSG00000007440	-0.464475	0.0677376	-6.85697	7.0336e-12	2.57708e-09	Pcdhac1
ENSMUSG00000007440	-0.464475	0.0677376	-6.85697	7.0336e-12	2.57708e-09	Pcdha10
ENSMUSG00000007440	-0.464475	0.0677376	-6.85697	7.0336e-12	2.57708e-09	Pcdha11
ENSMUSG00000007440	-0.464475	0.0677376	-6.85697	7.0336e-12	2.57708e-09	Pcdha11
ENSMUSG00000007440	-0.464475	0.0677376	-6.85697	7.0336e-12	2.57708e-09	Pcdha10
ENSMUSG00000007440	-0.464475	0.0677376	-6.85697	7.0336e-12	2.57708e-09	Pcdha11
ENSMUSG00000007440	-0.464475	0.0677376	-6.85697	7.0336e-12	2.57708e-09	Pcdha10
ENSMUSG00000007440	-0.464475	0.0677376	-6.85697	7.0336e-12	2.57708e-09	Pcdhac1
ENSMUSG00000007440	-0.464475	0.0677376	-6.85697	7.0336e-12	2.57708e-09	Pcdha11
ENSMUSG00000007440	-0.464475	0.0677376	-6.85697	7.0336e-12	2.57708e-09	Pcdha12
ENSMUSG00000007440	-0.464475	0.0677376	-6.85697	7.0336e-12	2.57708e-09	Pcdha12
ENSMUSG00000007440	-0.464475	0.0677376	-6.85697	7.0336e-12	2.57708e-09	Pcdha11
ENSMUSG00000007440	-0.464475	0.0677376	-6.85697	7.0336e-12	2.57708e-09	Pcdha10
ENSMUSG00000007440	-0.464475	0.0677376	-6.85697	7.0336e-12	2.57708e-09	Pcdhac1
ENSMUSG00000007440	-0.464475	0.0677376	-6.85697	7.0336e-12	2.57708e-09	Pcdhac1
ENSMUSG00000007440	-0.464475	0.0677376	-6.85697	7.0336e-12	2.57708e-09	Pcdha11
ENSMUSG00000007440	-0.464475	0.0677376	-6.85697	7.0336e-12	2.57708e-09	Pcdha11
ENSMUSG00000020704	-1.5742	0.230232	-6.83742	8.06315e-12	2.89401e-09	Accn1
ENSMUSG00000029093	-1.38437	0.203212	-6.81243	9.59638e-12	3.37543e-09	Sorcs2
ENSMUSG00000044022	-1.20555	0.177408	-6.79539	1.08021e-11	3.72504e-09	Pcdhb21
ENSMUSG00000055254	-0.782595	0.115885	-6.75321	1.44614e-11	4.891e-09	Ntrk2
ENSMUSG00000039579	-1.78333	0.2661	-6.70174	2.05958e-11	6.83432e-09	Grin3a
ENSMUSG00000024431	-1.52897	0.228653	-6.68685	2.28032e-11	7.42667e-09	Nr3c1
ENSMUSG00000045216	-0.741592	0.111004	-6.6808	2.37649e-11	7.59916e-09	Hs6st1
ENSMUSG00000005148	-2.22773	0.336695	-6.61646	3.6789e-11	1.15537e-08	Klf5
ENSMUSG00000039910	-1.55272	0.235393	-6.59629	4.21568e-11	1.30072e-08	Cited2
ENSMUSG00000048347	-1.22619	0.187162	-6.55149	5.69663e-11	1.72736e-08	Pcdhb18
ENSMUSG00000063415	-2.19481	0.337645	-6.50035	8.01314e-11	2.3886e-08	Cyp26b1
ENSMUSG00000027347	-1.35253	0.209275	-6.46291	1.02706e-10	3.01048e-08	Rasgrp1
ENSMUSG00000043531	-1.23537	0.19191	-6.43721	1.21687e-10	3.50838e-08	Sorcs1
ENSMUSG00000052539	-0.678536	0.106519	-6.37008	1.88929e-10	5.35917e-08	Magi3
ENSMUSG00000051242	-0.802727	0.126204	-6.36053	2.01056e-10	5.61265e-08	Pcdhb9
ENSMUSG00000035431	-1.8023	0.283961	-6.34698	2.19577e-10	6.03391e-08	Sstr1
ENSMUSG00000047842	-1.13415	0.179851	-6.30606	2.86233e-10	7.74458e-08	Diras2
ENSMUSG00000027358	-2.48927	0.400629	-6.21341	5.1846e-10	1.38154e-07	Bmp2
ENSMUSG00000021478	-1.05133	0.171167	-6.14212	8.14286e-10	2.13744e-07	Drd1a
ENSMUSG00000047904	-1.87503	0.307366	-6.10033	1.0585e-09	2.73762e-07	Sstr2
ENSMUSG00000038349	-0.975228	0.161028	-6.05625	1.3933e-09	3.55131e-07	Plcl1
ENSMUSG00000022262	0.877767	0.145032	6.05221	1.42874e-09	3.5896e-07	Dnahc5
ENSMUSG00000034402	-1.87712	0.311696	-6.02228	1.71979e-09	4.25998e-07	Kcnh5
ENSMUSG00000051615	-0.537982	0.0900297	-5.97561	2.29234e-09	5.59937e-07	Rap2a
ENSMUSG00000048251	-0.6984	0.116992	-5.96963	2.37788e-09	5.72873e-07	Bcl11b
ENSMUSG00000039960	-0.648412	0.109703	-5.91061	3.40842e-09	8.10053e-07	Rhou
ENSMUSG00000041708	-0.857158	0.145571	-5.88826	3.90282e-09	9.15184e-07	Mpped1
ENSMUSG00000047033	-1.10555	0.189039	-5.84825	4.96785e-09	1.1496e-06	Pcdhb15
ENSMUSG00000032265	-3.03365	0.519613	-5.83829	5.27402e-09	1.2046e-06	Fam46a
ENSMUSG00000089762	-2.75763	0.472532	-5.83586	5.3515e-09	1.20663e-06	Ier5l
ENSMUSG00000031673	-0.805476	0.138162	-5.82992	5.54533e-09	1.21907e-06	Cdh11
ENSMUSG00000053465	-1.43283	0.245764	-5.83013	5.53829e-09	1.21907e-06	Hs6st3
ENSMUSG00000016150	-0.988166	0.169718	-5.82241	5.80066e-09	1.25946e-06	Odz1
ENSMUSG00000018841	0.95155	0.163582	5.81695	5.99328e-09	1.28541e-06	Rad51l3
ENSMUSG00000036760	-2.32733	0.401373	-5.79842	6.69433e-09	1.41847e-06	Kcnk9
ENSMUSG00000019899	1.03406	0.178518	5.79245	6.93667e-09	1.45232e-06	Lama2
ENSMUSG00000020867	-3.11703	0.538861	-5.78447	7.27413e-09	1.48756e-06	Spata20
ENSMUSG00000059003	-1.16002	0.200519	-5.78509	7.24727e-09	1.48756e-06	Grin2a
ENSMUSG00000001986	-0.840693	0.148608	-5.65711	1.53943e-08	3.11195e-06	Gria3
ENSMUSG00000029231	-1.51412	0.268106	-5.64748	1.62815e-08	3.25389e-06	Pdgfra
ENSMUSG00000021730	-1.20107	0.212809	-5.64388	1.6626e-08	3.2854e-06	Hcn1
ENSMUSG00000044167	-0.998735	0.177081	-5.63999	1.70055e-08	3.32307e-06	Foxo1
ENSMUSG00000029821	0.63438	0.112636	5.63213	1.77998e-08	3.44005e-06	Dfna5
ENSMUSG00000073565	-2.2898	0.407322	-5.62161	1.8919e-08	3.61661e-06	Prr16
ENSMUSG00000046159	-1.19666	0.213337	-5.60923	2.03223e-08	3.84311e-06	Chrm3
ENSMUSG00000048218	-0.970515	0.173586	-5.59097	2.25803e-08	4.22467e-06	Amigo2
ENSMUSG00000022508	-1.99378	0.357099	-5.58328	2.3603e-08	4.36954e-06	Bcl6
ENSMUSG00000022332	-1.11046	0.199644	-5.56218	2.66419e-08	4.85432e-06	Khdrbs3
ENSMUSG00000030844	-1.32542	0.238328	-5.56132	2.67737e-08	4.85432e-06	Rgs10
ENSMUSG00000005958	-1.33722	0.240891	-5.55115	2.83794e-08	5.09294e-06	Ephb3
ENSMUSG00000026077	-1.46278	0.263644	-5.54831	2.88452e-08	5.12425e-06	Npas2
ENSMUSG00000020205	-1.52133	0.27476	-5.53696	3.07772e-08	5.35919e-06	Phlda1
ENSMUSG00000021294	-1.48158	0.267498	-5.53865	3.04819e-08	5.35919e-06	Kif26a
ENSMUSG00000051920	-1.48512	0.269093	-5.51899	3.40961e-08	5.87889e-06	Rspo2
ENSMUSG00000030513	-1.27645	0.23194	-5.50335	3.72638e-08	6.36271e-06	Pcsk6
ENSMUSG00000004151	-1.23467	0.225244	-5.48148	4.21779e-08	7.10309e-06	Etv1
ENSMUSG00000030930	-1.22452	0.223432	-5.48052	4.24077e-08	7.10309e-06	Chst15
ENSMUSG00000020953	-0.533928	0.0977452	-5.46245	4.69615e-08	7.79162e-06	Coch
ENSMUSG00000070695	-0.708458	0.129931	-5.45256	4.96503e-08	8.16075e-06	Cntnap5a
ENSMUSG00000032363	1.39755	0.257255	5.43257	5.55478e-08	9.04554e-06	Adamts7
ENSMUSG00000045404	-1.90732	0.352378	-5.41272	6.2073e-08	1.00154e-05	Kcnk13
ENSMUSG00000051486	-0.665935	0.12383	-5.37781	7.53962e-08	1.20545e-05	Pcdhb11
ENSMUSG00000016382	-0.704674	0.131192	-5.37133	7.81589e-08	1.23836e-05	Pls3
ENSMUSG00000022454	-0.484345	0.090404	-5.35756	8.43542e-08	1.32459e-05	Nell2
ENSMUSG00000021676	-1.3792	0.258254	-5.34049	9.2695e-08	1.43002e-05	Iqgap2
ENSMUSG00000030256	0.869401	0.162748	5.342	9.19272e-08	1.43002e-05	Bhlhe41
ENSMUSG00000056158	-1.94717	0.366528	-5.31248	1.08141e-07	1.65381e-05	Car10
ENSMUSG00000026640	-0.660622	0.124474	-5.30731	1.11253e-07	1.68674e-05	Plxna2
ENSMUSG00000059974	-0.628017	0.118637	-5.29359	1.19938e-07	1.80286e-05	Ntm
ENSMUSG00000063434	-1.32847	0.251053	-5.29158	1.21263e-07	1.80733e-05	Sorcs3
ENSMUSG00000023192	-0.752961	0.142649	-5.27841	1.30309e-07	1.92583e-05	Grm2
ENSMUSG00000022514	-1.78715	0.339244	-5.26803	1.37897e-07	2.02099e-05	Il1rap
ENSMUSG00000041592	-1.16751	0.222317	-5.25155	1.50824e-07	2.19218e-05	Sdk2
ENSMUSG00000022416	-0.836242	0.159287	-5.24989	1.52188e-07	2.19388e-05	Cacna1i
ENSMUSG00000059921	-0.888997	0.170678	-5.20861	1.90259e-07	2.72039e-05	Unc5c
ENSMUSG00000032564	-0.999173	0.192557	-5.18897	2.11461e-07	2.97518e-05	Cpne4
ENSMUSG00000034997	-2.76663	0.533106	-5.18965	2.10688e-07	2.97518e-05	Htr2a
ENSMUSG00000019997	-1.35595	0.261618	-5.18295	2.18403e-07	3.04846e-05	Ctgf
ENSMUSG00000024798	-1.855	0.358151	-5.17939	2.22617e-07	3.08281e-05	Htr7
ENSMUSG00000000078	-0.781541	0.151063	-5.17363	2.29593e-07	3.15457e-05	Klf6
ENSMUSG00000039239	-1.50887	0.293128	-5.14748	2.64008e-07	3.59931e-05	Tgfb2
ENSMUSG00000023927	-0.946083	0.183982	-5.14227	2.71444e-07	3.67222e-05	Satb1
ENSMUSG00000026344	-1.32917	0.259079	-5.13036	2.89189e-07	3.88242e-05	Lypd1
ENSMUSG00000039145	-0.620477	0.121096	-5.12386	2.9935e-07	3.98839e-05	Camk1d
ENSMUSG00000044461	-1.25712	0.246712	-5.09549	3.47839e-07	4.59958e-05	Shisa2
ENSMUSG00000045498	-0.976007	0.191936	-5.08506	3.67508e-07	4.82341e-05	Pcdhb3
ENSMUSG00000028195	-1.91855	0.377624	-5.08058	3.76279e-07	4.8659e-05	Cyr61
ENSMUSG00000053199	-1.13197	0.222758	-5.08161	3.7424e-07	4.8659e-05	Arhgap20
ENSMUSG00000001175	-0.604479	0.119165	-5.07262	3.92379e-07	5.03706e-05	Calm1
ENSMUSG00000001175	-0.604479	0.119165	-5.07262	3.92379e-07	5.03706e-05	Calm1
ENSMUSG00000001175	-0.604479	0.119165	-5.07262	3.92379e-07	5.03706e-05	Calm1
ENSMUSG00000063626	-0.806362	0.159101	-5.06825	4.015e-07	5.11679e-05	Unc5d
ENSMUSG00000003545	-1.95942	0.388171	-5.04783	4.46866e-07	5.65399e-05	Fosb
ENSMUSG00000031772	-1.01312	0.200883	-5.04336	4.57434e-07	5.74635e-05	Cntnap4
ENSMUSG00000032452	-0.849126	0.168411	-5.04198	4.60751e-07	5.74696e-05	Clstn2
ENSMUSG00000036510	-0.899696	0.178641	-5.03633	4.74532e-07	5.87718e-05	Cdh8
ENSMUSG00000036356	-0.774915	0.153947	-5.03366	4.81201e-07	5.9181e-05	Csgalnact1
ENSMUSG00000055026	-1.1487	0.228294	-5.03167	4.86228e-07	5.9384e-05	Gabrg3
ENSMUSG00000050248	1.46001	0.290931	5.01842	5.20988e-07	6.31905e-05	Evc2
ENSMUSG00000030657	-0.868929	0.173465	-5.00923	5.46468e-07	6.5827e-05	Xylt1
ENSMUSG00000052516	-0.74844	0.149569	-5.00399	5.61548e-07	6.71833e-05	Robo2
ENSMUSG00000018589	-0.74469	0.149211	-4.99086	6.01097e-07	7.09496e-05	Glra2
ENSMUSG00000019978	-0.705338	0.141293	-4.99202	5.975e-07	7.09496e-05	Epb4.1l2
ENSMUSG00000032128	-3.12971	0.628629	-4.97862	6.40385e-07	7.5083e-05	Robo3
ENSMUSG00000071636	0.816218	0.164417	4.96431	6.89459e-07	8.03014e-05	Rimbp3
ENSMUSG00000052713	1.15445	0.232766	4.95969	7.06052e-07	8.1693e-05	Zfp608
ENSMUSG00000003746	-1.06151	0.215116	-4.93459	8.03212e-07	9.11361e-05	Man1a
ENSMUSG00000046699	-1.06023	0.214836	-4.93509	8.01151e-07	9.11361e-05	Slitrk4
ENSMUSG00000072566	-0.661665	0.13403	-4.9367	7.94561e-07	9.11361e-05	Pvt1
ENSMUSG00000072720	0.803099	0.163148	4.92251	8.54392e-07	9.63217e-05	Myo18b
ENSMUSG00000031910	-1.00966	0.205353	-4.91669	8.80203e-07	9.8583e-05	Has3
ENSMUSG00000045954	1.15068	0.234093	4.91548	8.85661e-07	9.8583e-05	Sdpr
ENSMUSG00000036585	1.20645	0.245563	4.91299	8.96974e-07	9.92143e-05	Fgf1
ENSMUSG00000066687	-1.07192	0.21881	-4.89888	9.63853e-07	0.000105287	Zbtb16
ENSMUSG00000090061	-0.883069	0.180251	-4.8991	9.62773e-07	0.000105287	3110047P20Rik
ENSMUSG00000028434	0.601614	0.123074	4.88823	1.01744e-06	0.000110455	Epb4.1l4b
ENSMUSG00000024109	-0.386962	0.0792194	-4.88469	1.03592e-06	0.000111771	Nrxn1
ENSMUSG00000085795	-0.715856	0.146767	-4.8775	1.07439e-06	0.000115215	Zfp703
ENSMUSG00000020029	-0.631569	0.129592	-4.87352	1.09627e-06	0.000116849	Nudt4
ENSMUSG00000029467	-0.56445	0.115881	-4.87096	1.11059e-06	0.000117662	Atp2a2
ENSMUSG00000028909	-0.86986	0.178874	-4.86297	1.15636e-06	0.000121778	Ptpru
ENSMUSG00000019831	-0.662718	0.136653	-4.84965	1.2368e-06	0.000129474	Wasf1
ENSMUSG00000027748	-1.31609	0.272209	-4.83485	1.33247e-06	0.000138663	Trpc4
ENSMUSG00000052353	-0.956688	0.19877	-4.81304	1.48653e-06	0.000153786	9930013L23Rik
ENSMUSG00000022636	-1.18083	0.24557	-4.80852	1.52053e-06	0.000156383	Alcam
ENSMUSG00000004637	0.653038	0.136062	4.79958	1.59001e-06	0.000162578	Wwox
ENSMUSG00000039488	-0.817877	0.170509	-4.79667	1.61328e-06	0.000164004	Cntn5
ENSMUSG00000039115	-1.39367	0.291422	-4.7823	1.733e-06	0.000175163	Itga9
ENSMUSG00000032502	-1.08236	0.226691	-4.7746	1.80066e-06	0.000180961	Stac
ENSMUSG00000047921	0.469958	0.0985212	4.77012	1.84119e-06	0.000183983	Trappc9
ENSMUSG00000030123	-0.977939	0.205522	-4.75833	1.95201e-06	0.000193955	Plxnd1
ENSMUSG00000056752	0.877484	0.184684	4.75128	2.02132e-06	0.000199713	Dnahc9
ENSMUSG00000028033	-0.806156	0.169855	-4.74613	2.07342e-06	0.000203717	Kcnq5
ENSMUSG00000026991	-0.515872	0.108788	-4.74198	2.11642e-06	0.000206786	Pkp4
ENSMUSG00000030226	-0.492657	0.103988	-4.73761	2.16251e-06	0.000210122	Lmo3
ENSMUSG00000020014	0.878338	0.185564	4.73334	2.20854e-06	0.000213415	Gm872
ENSMUSG00000020014	0.878338	0.185564	4.73334	2.20854e-06	0.000213415	4930485B16Rik
ENSMUSG00000027386	-1.38922	0.294428	-4.71836	2.37759e-06	0.000228495	Fbln7
ENSMUSG00000028519	-0.720944	0.152934	-4.7141	2.42785e-06	0.000231076	Dab1
ENSMUSG00000063687	-0.580343	0.123114	-4.71386	2.43072e-06	0.000231076	Pcdhb5
ENSMUSG00000054555	-1.00717	0.214165	-4.70278	2.56644e-06	0.000242667	Adam12
ENSMUSG00000045062	-0.590182	0.125577	-4.69975	2.60482e-06	0.000244978	Pcdhb7
ENSMUSG00000045287	-0.813738	0.1736	-4.68744	2.76639e-06	0.00025879	Rtn4rl1
ENSMUSG00000074505	-1.45089	0.309875	-4.68218	2.83841e-06	0.000264122	Fat3
ENSMUSG00000026156	-0.739371	0.158138	-4.67549	2.93252e-06	0.000271443	B3gat2
ENSMUSG00000067786	-0.57256	0.123451	-4.63794	3.51901e-06	0.000324025	Nnat
ENSMUSG00000026576	-0.860864	0.18569	-4.63604	3.5515e-06	0.000325314	Atp1b1
ENSMUSG00000029483	-1.21656	0.262789	-4.62942	3.66699e-06	0.000334152	Tmem132b
ENSMUSG00000035606	1.15581	0.249784	4.62725	3.70551e-06	0.000335922	Ky
ENSMUSG00000020052	-1.62503	0.351408	-4.62434	3.75789e-06	0.000338923	Ascl1
ENSMUSG00000036192	-0.986879	0.213517	-4.62201	3.80039e-06	0.000341007	Rorb
ENSMUSG00000019814	-0.578254	0.125333	-4.61374	3.95486e-06	0.000353066	Ltv1
ENSMUSG00000030616	0.851193	0.185276	4.59419	4.34437e-06	0.000385881	Sytl2
ENSMUSG00000045038	-0.478683	0.104404	-4.58491	4.54183e-06	0.000401393	Prkce
ENSMUSG00000035576	0.807254	0.176119	4.58358	4.57092e-06	0.000401944	L3mbtl1
ENSMUSG00000045875	-1.99109	0.435614	-4.57076	4.85964e-06	0.000425207	Adra1a
ENSMUSG00000038296	-1.43835	0.315586	-4.55771	5.17136e-06	0.000450241	Galntl4
ENSMUSG00000073207	1.35163	0.297241	4.54725	5.43522e-06	0.000470883	Ccdc160
ENSMUSG00000022285	-0.401561	0.0883553	-4.54485	5.49755e-06	0.000473948	Ywhaz
ENSMUSG00000031286	-1.98678	0.437263	-4.54368	5.52796e-06	0.000474245	Glt28d2
ENSMUSG00000005672	-0.792854	0.174783	-4.53622	5.72711e-06	0.000488945	Kit
ENSMUSG00000040125	-0.813301	0.179392	-4.53366	5.79705e-06	0.000491661	Gpr26
ENSMUSG00000067578	-2.12003	0.467687	-4.53301	5.81484e-06	0.000491661	Cbln4
ENSMUSG00000032360	-2.20979	0.488108	-4.52725	5.97559e-06	0.000502836	Hcrtr2
ENSMUSG00000032503	-0.597997	0.132244	-4.52193	6.12794e-06	0.0005132	Arpp21
ENSMUSG00000028804	-0.687505	0.152263	-4.51525	6.32411e-06	0.000527119	Csmd2
ENSMUSG00000020905	-0.864649	0.192133	-4.50027	6.78664e-06	0.000561849	Usp43
ENSMUSG00000054640	-0.288777	0.0641768	-4.49971	6.80467e-06	0.000561849	Slc8a1
ENSMUSG00000001260	-1.27645	0.283864	-4.49669	6.9018e-06	0.000567205	Gabrg1
ENSMUSG00000021721	-1.54237	0.343558	-4.48941	7.14193e-06	0.000581856	Htr1a
ENSMUSG00000028737	0.543489	0.121064	4.48929	7.14624e-06	0.000581856	Aldh4a1
ENSMUSG00000025946	-1.99407	0.445903	-4.47197	7.75014e-06	0.000625649	Pth2r
ENSMUSG00000049112	-1.26991	0.283981	-4.47183	7.75525e-06	0.000625649	Oxtr
ENSMUSG00000031530	-2.20869	0.495038	-4.46165	8.13302e-06	0.00065313	Dusp4
ENSMUSG00000036158	-0.765803	0.171698	-4.46018	8.18895e-06	0.000654632	Prickle1
ENSMUSG00000061731	-0.554297	0.12436	-4.45721	8.30349e-06	0.000660785	Ext1
ENSMUSG00000070509	-1.03827	0.23336	-4.44922	8.61845e-06	0.00068276	Rgma
ENSMUSG00000054619	0.876871	0.19717	4.44729	8.69624e-06	0.000685833	Mettl7a1
ENSMUSG00000053930	-1.05356	0.237139	-4.44279	8.87984e-06	0.000697187	Shisa6
ENSMUSG00000055660	-0.676359	0.152605	-4.43208	9.33267e-06	0.000729483	Mettl4
ENSMUSG00000090433	0.909837	0.205578	4.42576	9.61043e-06	0.00074787	9430037G07Rik
ENSMUSG00000023034	-1.5594	0.352709	-4.4212	9.81548e-06	0.000760462	Nr4a1
ENSMUSG00000022762	-0.851722	0.192918	-4.41495	1.01035e-05	0.00077934	Ncam2
ENSMUSG00000066129	0.49927	0.113221	4.4097	1.03516e-05	0.000794995	Kndc1
ENSMUSG00000019970	-1.01609	0.230572	-4.40681	1.04905e-05	0.000802159	Sgk1
ENSMUSG00000030064	0.850908	0.193214	4.40396	1.0629e-05	0.000809232	Frmd4b
ENSMUSG00000030092	-0.996693	0.226487	-4.40067	1.07919e-05	0.000818092	Cntn6
ENSMUSG00000033350	-0.922137	0.209785	-4.39564	1.10448e-05	0.00083367	Chst2
ENSMUSG00000061578	0.563891	0.128335	4.39389	1.11342e-05	0.000836828	Ksr2
ENSMUSG00000032515	-1.62502	0.370364	-4.38764	1.14585e-05	0.000857536	Csrnp1
ENSMUSG00000030093	-1.35252	0.308502	-4.38415	1.16441e-05	0.000867733	Wnt7a
ENSMUSG00000090430	-0.972227	0.221902	-4.38134	1.17951e-05	0.000875273	Snhg4
ENSMUSG00000022512	-3.14652	0.718759	-4.37771	1.19934e-05	0.000886251	Cldn1
ENSMUSG00000021039	-0.385373	0.0883203	-4.36336	1.28081e-05	0.000942494	Snw1
ENSMUSG00000024642	-0.738248	0.16936	-4.35906	1.30624e-05	0.000957199	Tle4
ENSMUSG00000026312	-0.77991	0.178986	-4.35737	1.31634e-05	0.000960602	Cdh7
ENSMUSG00000024558	-0.716015	0.164658	-4.34851	1.37069e-05	0.000996126	Mapk4
ENSMUSG00000024544	-0.612676	0.141134	-4.34109	1.4178e-05	0.00102612	D18Ertd653e
ENSMUSG00000034981	-1.21025	0.279117	-4.33598	1.45113e-05	0.00104594	Parm1
ENSMUSG00000025658	-0.816285	0.188465	-4.33123	1.48277e-05	0.00106439	Cnksr2
ENSMUSG00000030607	-2.367	0.547159	-4.32599	1.51849e-05	0.0010856	Acan
ENSMUSG00000028341	-1.33894	0.310565	-4.31131	1.62292e-05	0.00115556	Nr4a3
ENSMUSG00000028101	0.459807	0.107015	4.29667	1.73386e-05	0.00122464	Pias3
ENSMUSG00000038280	0.404469	0.0941252	4.29714	1.7302e-05	0.00122464	Ostm1
ENSMUSG00000020185	-1.54021	0.358938	-4.29101	1.7786e-05	0.00125121	E2f7
ENSMUSG00000034488	-0.803353	0.187305	-4.28902	1.79465e-05	0.00125509	Edil3
ENSMUSG00000052837	-1.39619	0.325622	-4.28777	1.80473e-05	0.00125509	Junb
ENSMUSG00000060988	-0.517848	0.120776	-4.28768	1.80552e-05	0.00125509	Galnt13
ENSMUSG00000041729	0.361979	0.084474	4.28509	1.82666e-05	0.00126478	Coro2b
ENSMUSG00000022103	-0.933415	0.217928	-4.28314	1.84275e-05	0.00127092	Gfra2
ENSMUSG00000020171	-0.528611	0.123504	-4.28012	1.86789e-05	0.00128323	Yeats4
ENSMUSG00000008575	0.657339	0.153684	4.2772	1.89258e-05	0.00129233	Nfib
ENSMUSG00000026360	-1.5467	0.361721	-4.27596	1.90319e-05	0.00129233	Rgs2
ENSMUSG00000045083	-0.611119	0.142903	-4.27646	1.89888e-05	0.00129233	Lingo2
ENSMUSG00000066979	-0.388854	0.0910475	-4.27089	1.94695e-05	0.00131696	Bub3
ENSMUSG00000033453	-1.48312	0.347894	-4.26314	2.0157e-05	0.00135824	Adamts15
ENSMUSG00000020123	-1.55431	0.36496	-4.25884	2.0549e-05	0.00137937	Avpr1a
ENSMUSG00000031618	-1.23346	0.289771	-4.25669	2.07478e-05	0.00138742	Nr3c2
ENSMUSG00000020644	-1.3696	0.321935	-4.25428	2.09722e-05	0.00139711	Id2
ENSMUSG00000031309	-0.686523	0.161422	-4.25296	2.1096e-05	0.00140006	Rps6ka3
ENSMUSG00000019647	-1.16792	0.274841	-4.24942	2.14322e-05	0.00140645	Sema6a
ENSMUSG00000038156	-1.10535	0.260098	-4.24974	2.14014e-05	0.00140645	Spon1
ENSMUSG00000085264	1.93614	0.455493	4.25064	2.13165e-05	0.00140645	Gm15581
ENSMUSG00000048978	-0.826409	0.194652	-4.24556	2.18049e-05	0.00142031	Nrsn1
ENSMUSG00000071550	0.954381	0.224752	4.24637	2.17264e-05	0.00142031	Wdr52
ENSMUSG00000021536	-0.565581	0.133309	-4.24262	2.20925e-05	0.00143373	Adcy2
ENSMUSG00000025582	-1.56603	0.369232	-4.24133	2.22201e-05	0.00143671	Nptx1
ENSMUSG00000027739	-0.413198	0.0976115	-4.23309	2.30501e-05	0.00147471	Rab33b
ENSMUSG00000051323	-0.588872	0.139106	-4.23328	2.30311e-05	0.00147471	Pcdh19
ENSMUSG00000060487	-0.932756	0.220353	-4.233	2.30594e-05	0.00147471	Samd5
ENSMUSG00000028266	-0.728489	0.172223	-4.22991	2.33786e-05	0.00148746	Lmo4
ENSMUSG00000064293	-1.76032	0.416207	-4.22944	2.34279e-05	0.00148746	Cntn4
ENSMUSG00000024553	-2.76134	0.653625	-4.22465	2.39308e-05	0.00151392	Galr1
ENSMUSG00000055078	-1.34513	0.318557	-4.22257	2.41532e-05	0.00152252	Gabra5
ENSMUSG00000037286	0.404743	0.0959919	4.21643	2.48195e-05	0.00155893	Stag1
ENSMUSG00000027419	-0.804155	0.191969	-4.18898	2.80217e-05	0.0017538	Pcsk2
ENSMUSG00000050663	-1.11598	0.266689	-4.18458	2.85693e-05	0.00178173	Trhde
ENSMUSG00000053560	-1.46258	0.349738	-4.18193	2.89047e-05	0.00179628	Ier2
ENSMUSG00000022382	-0.833666	0.199424	-4.18038	2.91028e-05	0.00180222	Wnt7b
ENSMUSG00000027746	-0.428762	0.102587	-4.17949	2.92168e-05	0.00180293	Ufm1
ENSMUSG00000027860	0.967058	0.232145	4.16574	3.1034e-05	0.00190625	Vangl1
ENSMUSG00000037321	0.658647	0.158131	4.1652	3.11079e-05	0.00190625	Tap1
ENSMUSG00000046182	-1.31277	0.315721	-4.15799	3.21054e-05	0.00196055	Gsg1l
ENSMUSG00000030075	-0.876784	0.210957	-4.15622	3.23559e-05	0.00196901	Cntn3
ENSMUSG00000005125	-0.476012	0.114641	-4.15219	3.29306e-05	0.00199554	Ndrg1
ENSMUSG00000019916	-0.88379	0.212914	-4.15092	3.31135e-05	0.00199554	P4ha1
ENSMUSG00000051663	1.06415	0.256373	4.15079	3.31323e-05	0.00199554	Pcdhb1
ENSMUSG00000028019	-1.12305	0.270662	-4.14928	3.33527e-05	0.00200196	Pdgfc
ENSMUSG00000059857	-1.05029	0.253505	-4.1431	3.42648e-05	0.00204277	Ntng1
ENSMUSG00000073805	-0.746365	0.180116	-4.1438	3.41594e-05	0.00204277	Fam196a
ENSMUSG00000002190	0.723155	0.175105	4.12985	3.63005e-05	0.00215043	Clgn
ENSMUSG00000026321	-0.670364	0.162325	-4.12975	3.63153e-05	0.00215043	Tnfrsf11a
ENSMUSG00000024190	-1.08801	0.263601	-4.1275	3.66723e-05	0.00216428	Dusp1
ENSMUSG00000063887	-0.959822	0.233033	-4.11882	3.8081e-05	0.0022399	Nlgn1
ENSMUSG00000022494	-1.28442	0.312264	-4.11323	3.9016e-05	0.00228725	Shisa9
ENSMUSG00000039089	-0.785533	0.192164	-4.08783	4.3543e-05	0.00254416	L3mbtl3
ENSMUSG00000045231	2.17883	0.533242	4.08601	4.3885e-05	0.00255565	BC106179
ENSMUSG00000079254	-1.28911	0.315662	-4.08382	4.43015e-05	0.00257139	Itprip
ENSMUSG00000024750	-0.545761	0.133845	-4.07755	4.55128e-05	0.00261579	Zfand5
ENSMUSG00000034771	0.563774	0.138232	4.07846	4.53345e-05	0.00261579	Tle2
ENSMUSG00000041773	-0.542644	0.133075	-4.07772	4.54797e-05	0.00261579	Enc1
ENSMUSG00000031647	-1.0313	0.253144	-4.07396	4.62212e-05	0.00264786	Mfap3l
ENSMUSG00000041695	-1.25148	0.307677	-4.06752	4.75158e-05	0.00271318	Kcnj2
ENSMUSG00000071708	-0.498589	0.122616	-4.06626	4.77739e-05	0.00271909	Sms
ENSMUSG00000071708	-0.498589	0.122616	-4.06626	4.77739e-05	0.00271909	Sms
ENSMUSG00000055027	1.79199	0.441015	4.06334	4.83758e-05	0.00274447	Smyd1
ENSMUSG00000055333	1.29937	0.32036	4.05595	4.99302e-05	0.00282354	Fat2
ENSMUSG00000020961	0.722292	0.178577	4.04472	5.23868e-05	0.00295297	Ston2
ENSMUSG00000044770	0.732293	0.181227	4.04074	5.32817e-05	0.00299382	Scml4
ENSMUSG00000046321	-0.466958	0.116078	-4.0228	5.7511e-05	0.00322117	Hs3st2
ENSMUSG00000020598	-0.468258	0.11653	-4.01833	5.86121e-05	0.00326206	Nrcam
ENSMUSG00000024990	-1.16283	0.289331	-4.01902	5.84415e-05	0.00326206	Rbp4
ENSMUSG00000045657	-0.848876	0.211403	-4.01544	5.9334e-05	0.00329182	Pcdhb10
ENSMUSG00000092033	-0.998734	0.249211	-4.00758	6.13442e-05	0.00339265	A730056A06Rik
ENSMUSG00000022021	0.786511	0.197049	3.99144	6.56723e-05	0.00362062	Diap3
ENSMUSG00000048915	-1.60921	0.403656	-3.98659	6.70294e-05	0.00368389	Efna5
ENSMUSG00000024924	-0.530998	0.133489	-3.97783	6.95461e-05	0.00377502	Vldlr
ENSMUSG00000027630	-0.479079	0.120373	-3.97994	6.89326e-05	0.00377502	Tbl1xr1
ENSMUSG00000028444	0.404247	0.101621	3.97799	6.95004e-05	0.00377502	Cntfr
ENSMUSG00000056267	0.61524	0.154665	3.97789	6.95298e-05	0.00377502	Cep70
ENSMUSG00000050505	-1.65371	0.416128	-3.97405	7.06598e-05	0.00382367	Pcdh20
ENSMUSG00000071341	-2.03347	0.512202	-3.97007	7.18526e-05	0.0038763	Egr4
ENSMUSG00000029822	-1.24049	0.312969	-3.96361	7.38241e-05	0.00397047	Osbpl3
ENSMUSG00000020811	-0.986819	0.249143	-3.96085	7.46848e-05	0.00400452	Wscd1
ENSMUSG00000052783	0.910694	0.23024	3.95542	7.64018e-05	0.00408413	Grk4
ENSMUSG00000044674	1.24885	0.315845	3.95399	7.68581e-05	0.00409607	Fzd1
ENSMUSG00000070047	-1.46801	0.371702	-3.94944	7.83331e-05	0.00416207	Fat1
ENSMUSG00000044043	-0.846791	0.214469	-3.94831	7.87061e-05	0.00416929	Pcdhb14
ENSMUSG00000022026	1.25655	0.318337	3.94724	7.90574e-05	0.00417532	Olfm4
ENSMUSG00000020423	-1.28797	0.326369	-3.94637	7.93461e-05	0.00417802	Btg2
ENSMUSG00000026235	0.624325	0.158534	3.93812	8.21238e-05	0.00431138	Epha4
ENSMUSG00000032017	-0.605835	0.154084	-3.93184	8.4298e-05	0.00441235	Grik4
ENSMUSG00000025743	-0.292088	0.0744488	-3.92334	8.7329e-05	0.00453054	Sdc3
ENSMUSG00000027078	-0.851007	0.216844	-3.92451	8.69055e-05	0.00453054	Ube2l6
ENSMUSG00000053141	-0.787015	0.200564	-3.924	8.70899e-05	0.00453054	Ptprt
ENSMUSG00000057614	-0.378518	0.0969487	-3.90431	9.4496e-05	0.00488795	Gnai1
ENSMUSG00000002257	1.19914	0.307242	3.90291	9.50418e-05	0.00490136	Def6
ENSMUSG00000068551	0.63795	0.163484	3.90222	9.53128e-05	0.00490136	Zfp467
ENSMUSG00000026670	-0.543651	0.139376	-3.9006	9.5953e-05	0.0049199	Uap1
ENSMUSG00000028373	-1.03504	0.265403	-3.89987	9.62426e-05	0.0049204	Astn2
ENSMUSG00000032501	-1.22047	0.313043	-3.89873	9.66981e-05	0.00492936	Trib1
ENSMUSG00000037572	0.731386	0.187725	3.89604	9.77776e-05	0.00496998	Wdhd1
ENSMUSG00000034021	-0.508331	0.130611	-3.89194	9.94461e-05	0.00504023	Pds5b
ENSMUSG00000021905	-0.4131	0.106383	-3.88314	0.000103116	0.00521121	Dph3
ENSMUSG00000053399	1.30912	0.337962	3.87356	0.000107255	0.00540487	Adamts18
ENSMUSG00000035357	-1.26754	0.327611	-3.86905	0.000109259	0.0054901	Pdzrn3
ENSMUSG00000040016	-0.653319	0.168991	-3.86601	0.00011063	0.00554316	Ptger3
ENSMUSG00000041112	-0.945359	0.244824	-3.86138	0.00011275	0.00563333	Elmo1
ENSMUSG00000051599	-0.646367	0.167676	-3.85486	0.000115796	0.00576911	Pcdhb2
ENSMUSG00000020486	0.724737	0.188159	3.85172	0.000117292	0.00582715	2004-09-01
ENSMUSG00000048988	-1.12201	0.291362	-3.85092	0.000117677	0.00582982	Elfn1
ENSMUSG00000090785	1.69205	0.439858	3.8468	0.000119669	0.00591185	Gm17116
ENSMUSG00000041688	0.655456	0.170662	3.84068	0.000122694	0.00604432	Amot
ENSMUSG00000035131	-0.85645	0.223065	-3.83947	0.000123301	0.00605725	Fam5c
ENSMUSG00000038418	-1.97247	0.513902	-3.83822	0.000123929	0.00607112	Egr1
ENSMUSG00000028351	-1.05642	0.275354	-3.83659	0.000124754	0.00607771	Dbc1
ENSMUSG00000060534	-0.668212	0.174143	-3.83715	0.00012447	0.00607771	Dcc
ENSMUSG00000040495	-0.654769	0.170759	-3.83445	0.000125844	0.0060998	Chrm4
ENSMUSG00000060961	-1.10349	0.287842	-3.83366	0.000126248	0.0060998	Slc4a4
ENSMUSG00000085210	0.71997	0.187774	3.83424	0.000125951	0.0060998	Gm16615
ENSMUSG00000070498	-1.1444	0.298955	-3.82799	0.000129194	0.00622503	Tmem132b
ENSMUSG00000024397	0.768377	0.200783	3.8269	0.000129767	0.00623556	Aif1
ENSMUSG00000004562	0.695624	0.181901	3.82418	0.000131206	0.00625297	Arhgef40
ENSMUSG00000011752	-0.438955	0.114777	-3.82443	0.000131073	0.00625297	Pgam1
ENSMUSG00000039546	-0.64622	0.168997	-3.82385	0.000131386	0.00625297	Ajap1
ENSMUSG00000057604	0.814122	0.212924	3.82354	0.000131552	0.00625297	Lmcd1
ENSMUSG00000018362	-0.381703	0.100089	-3.81363	0.00013694	0.0064741	Kpna2
ENSMUSG00000040857	-1.03356	0.270976	-3.81422	0.000136612	0.0064741	Erf
ENSMUSG00000031442	0.376583	0.0987757	3.8125	0.000137566	0.00648624	Mcf2l
ENSMUSG00000022114	-1.00012	0.263301	-3.79841	0.000145628	0.00684803	Spry2
ENSMUSG00000071176	0.57278	0.150933	3.79493	0.000147686	0.00692629	Arhgef10
ENSMUSG00000030254	-0.488816	0.128852	-3.79363	0.000148463	0.00694418	Rad18
ENSMUSG00000044689	1.16684	0.308065	3.78764	0.000152083	0.00709466	Gm13749
ENSMUSG00000039385	-0.63008	0.166389	-3.7868	0.000152601	0.00709996	Cdh6
ENSMUSG00000013698	-0.366541	0.0969241	-3.78173	0.000155742	0.007227	Pea15a
ENSMUSG00000053024	0.476519	0.126051	3.78037	0.000156598	0.00724762	Cntn2
ENSMUSG00000029436	-0.502049	0.132981	-3.77534	0.000159788	0.00737584	Mmp17
ENSMUSG00000045071	0.575884	0.152716	3.77096	0.000162619	0.00748685	E130308A19Rik
ENSMUSG00000051726	-1.10289	0.292577	-3.76957	0.000163527	0.00750903	Kcnf1
ENSMUSG00000014907	-0.472408	0.12539	-3.76752	0.000164879	0.00755135	Naf1
ENSMUSG00000090069	0.788253	0.209763	3.75783	0.000171395	0.00782941	E430024P14Rik
ENSMUSG00000090069	0.788253	0.209763	3.75783	0.000171395	0.00782941	D030054H15Rik
ENSMUSG00000090769	0.755938	0.201286	3.75554	0.000172971	0.00788093	Gm2824
ENSMUSG00000022176	-1.07995	0.288836	-3.73896	0.000184784	0.00837686	Rem2
ENSMUSG00000037868	-2.78229	0.744158	-3.73884	0.000184869	0.00837686	Egr2
ENSMUSG00000087413	1.07232	0.286849	3.73828	0.000185284	0.00837686	Gm11266
ENSMUSG00000040254	-1.10633	0.29608	-3.73661	0.000186518	0.00841102	Sema3d
ENSMUSG00000000531	-1.10859	0.296846	-3.73457	0.000188039	0.00843782	Grasp
ENSMUSG00000026833	-0.372749	0.0998117	-3.73452	0.000188072	0.00843782	Olfm1
ENSMUSG00000024308	0.623301	0.167521	3.72072	0.000198655	0.00888993	Tapbp
ENSMUSG00000091267	0.93314	0.25092	3.71887	0.000200116	0.00893257	Gm17322
ENSMUSG00000026824	-0.930193	0.250762	-3.70947	0.000207695	0.00924744	Kcnj3
ENSMUSG00000025289	-0.644594	0.174024	-3.70405	0.000212183	0.0094234	Prdx4
ENSMUSG00000022602	-2.37532	0.642333	-3.69796	0.000217335	0.00962586	Arc
ENSMUSG00000071860	-0.930502	0.251665	-3.69738	0.000217837	0.00962586	2900055J20Rik
ENSMUSG00000023032	0.488739	0.13232	3.69361	0.000221093	0.00969666	Slc4a8
ENSMUSG00000035934	-0.944011	0.255559	-3.69391	0.000220833	0.00969666	Pknox2
ENSMUSG00000074622	0.810079	0.219245	3.69486	0.00022001	0.00969666	Mafb
ENSMUSG00000039081	-1.12689	0.305223	-3.69201	0.000222491	0.00973369	Zfp503
ENSMUSG00000028803	0.756788	0.205134	3.68923	0.000224936	0.00981626	Nipal3
ENSMUSG00000074664	-1.08586	0.294558	-3.68641	0.000227441	0.00990102	A830092H15Rik
ENSMUSG00000026347	-0.723927	0.196601	-3.68222	0.000231212	0.00998454	Tmem163
ENSMUSG00000032743	0.460532	0.125071	3.68215	0.000231272	0.00998454	D430042O09Rik
ENSMUSG00000086921	1.36711	0.371319	3.68176	0.000231631	0.00998454	Gm13189
ENSMUSG00000092094	-1.43716	0.390267	-3.68249	0.000230963	0.00998454	Zfp804b
ENSMUSG00000079502	1.16419	0.316373	3.67981	0.00023341	0.0100366	1700101E01Rik
ENSMUSG00000045613	-1.63958	0.446094	-3.6754	0.000237477	0.0101866	Chrm2
ENSMUSG00000049985	0.960194	0.261928	3.66587	0.000246498	0.0105478	Ankrd55
ENSMUSG00000035283	-0.788067	0.215017	-3.66513	0.000247209	0.0105526	Adrb1
ENSMUSG00000078429	-0.420851	0.115068	-3.65742	0.000254765	0.0108488	Ctdsp2
ENSMUSG00000026058	-0.742579	0.203202	-3.65439	0.000257791	0.0109248	Khdrbs2
ENSMUSG00000039765	0.650454	0.177987	3.6545	0.000257684	0.0109248	Cc2d2a
ENSMUSG00000045414	-0.968096	0.265162	-3.65096	0.000261265	0.0110453	1190002N15Rik
ENSMUSG00000040430	-0.416583	0.114129	-3.65011	0.000262131	0.0110554	Pitpnc1
ENSMUSG00000031024	0.795519	0.218231	3.64531	0.000267074	0.0112369	St5
ENSMUSG00000047307	-0.70485	0.193439	-3.64379	0.000268654	0.0112764	Pcdhb13
ENSMUSG00000050541	-1.68777	0.463827	-3.6388	0.000273911	0.0114697	Adra1b
ENSMUSG00000028436	-0.19714	0.0542622	-3.6331	0.000280032	0.0116704	Dcaf12
ENSMUSG00000038910	-0.298361	0.0821201	-3.63323	0.000279896	0.0116704	Plcl2
ENSMUSG00000031558	-1.3069	0.359984	-3.63043	0.000282953	0.0117643	Slit2
ENSMUSG00000052560	-1.07546	0.29671	-3.62461	0.000289402	0.012004	Cpne8
ENSMUSG00000034297	-0.547867	0.151293	-3.62122	0.000293215	0.0121336	Med13
ENSMUSG00000027777	-0.444065	0.122932	-3.61229	0.000303504	0.0125299	Schip1
ENSMUSG00000027777	-0.444065	0.122932	-3.61229	0.000303504	0.0125299	Schip1
ENSMUSG00000058498	1.12082	0.310607	3.60849	0.000307985	0.0126851	Rnf207
ENSMUSG00000029765	-0.595348	0.165038	-3.60734	0.000309348	0.0127115	Plxna4
ENSMUSG00000032563	-0.288769	0.0801266	-3.60391	0.000313462	0.0128505	Mrpl3
ENSMUSG00000021943	-1.34666	0.373922	-3.60144	0.000316455	0.012913	Gdf10
ENSMUSG00000061911	0.480158	0.133324	3.60145	0.000316453	0.012913	Myt1l
ENSMUSG00000026109	-0.36423	0.101173	-3.60006	0.000318141	0.0129517	Tmeff2
ENSMUSG00000039252	-0.792567	0.220264	-3.59826	0.000320348	0.0130115	Lgi2
ENSMUSG00000028207	-0.477082	0.132786	-3.59286	0.000327071	0.0132476	Asph
ENSMUSG00000032803	-0.363482	0.101181	-3.59238	0.000327669	0.0132476	Cdv3
ENSMUSG00000034659	-0.621313	0.173027	-3.59084	0.000329608	0.0132955	Tmem109
ENSMUSG00000026527	-0.698739	0.195005	-3.58318	0.000339436	0.0136606	Rgs7
ENSMUSG00000029015	1.86521	0.52072	3.58199	0.000340989	0.0136917	Slc26a5
ENSMUSG00000091024	1.75692	0.491024	3.57808	0.000346132	0.0138666	Gm17351
ENSMUSG00000021250	-1.40865	0.39403	-3.57499	0.000350235	0.0139991	Fos
ENSMUSG00000029328	-0.39934	0.111776	-3.57269	0.000353331	0.0140908	Hnrpdl
ENSMUSG00000000325	0.418077	0.117114	3.56981	0.000357236	0.0142143	Arvcf
ENSMUSG00000020400	0.482018	0.135085	3.56827	0.000359346	0.0142489	Tnip1
ENSMUSG00000026509	0.235364	0.0659655	3.56799	0.000359727	0.0142489	Capn2
ENSMUSG00000057329	-0.444934	0.12498	-3.56004	0.0003708	0.0146545	Bcl2
ENSMUSG00000031584	0.418126	0.117676	3.55321	0.000380563	0.0150067	Gsr
ENSMUSG00000034579	0.92143	0.259373	3.55253	0.000381546	0.0150117	Pla2g3
ENSMUSG00000021745	-0.473998	0.133585	-3.54828	0.000387761	0.0152222	Ptprg
ENSMUSG00000022324	0.891609	0.251361	3.54713	0.000389455	0.0152547	Matn2
ENSMUSG00000006932	-0.230612	0.0650515	-3.54506	0.000392524	0.0153217	Ctnnb1
ENSMUSG00000021830	0.40907	0.1154	3.5448	0.000392908	0.0153217	Txndc16
ENSMUSG00000030098	0.331779	0.0936294	3.54354	0.000394794	0.0153442	Grip2
ENSMUSG00000057715	-0.776565	0.219168	-3.54325	0.000395232	0.0153442	A830018L16Rik
ENSMUSG00000038602	-0.695759	0.196445	-3.54176	0.000397473	0.0153634	Slc35f1
ENSMUSG00000050587	-0.925202	0.261209	-3.542	0.000397108	0.0153634	Lrrc4c
ENSMUSG00000048027	-0.382124	0.107942	-3.54008	0.000400008	0.0154275	Rgmb
ENSMUSG00000022321	-0.614921	0.173869	-3.53669	0.000405176	0.0155586	Cdh10
ENSMUSG00000033717	-0.594167	0.167983	-3.53706	0.000404605	0.0155586	Adra2a
ENSMUSG00000045761	1.431	0.404846	3.53468	0.000408273	0.0156433	Fam179a
ENSMUSG00000056258	-0.666271	0.18857	-3.53329	0.000410423	0.0156915	Kcnq3
ENSMUSG00000025810	-0.84247	0.238523	-3.53202	0.000412392	0.01573	Nrp1
ENSMUSG00000034037	0.756881	0.214323	3.53149	0.000413218	0.01573	Fgd5
ENSMUSG00000024042	-0.783078	0.222122	-3.52543	0.000422788	0.0160524	Sik1
ENSMUSG00000044341	-0.465917	0.132176	-3.52498	0.000423512	0.0160524	Gm5601
ENSMUSG00000038967	0.625948	0.177632	3.52385	0.000425332	0.0160867	Pdk2
ENSMUSG00000054477	-1.11964	0.318407	-3.51636	0.000437499	0.0164868	Kcnn2
ENSMUSG00000062098	-0.764851	0.217523	-3.51619	0.000437784	0.0164868	Btbd3
ENSMUSG00000036545	-0.980656	0.278949	-3.51554	0.000438859	0.0164919	Adamts2
ENSMUSG00000050936	0.518138	0.147549	3.51162	0.000445376	0.0167011	Hist2h2bb
ENSMUSG00000045689	-0.820386	0.234057	-3.50507	0.000456488	0.0170814	Pcdhb4
ENSMUSG00000026090	-0.704892	0.201661	-3.49542	0.000473308	0.0176694	2010300C02Rik
ENSMUSG00000031298	-0.980787	0.280632	-3.49492	0.000474211	0.0176694	Gpr64
ENSMUSG00000025995	-0.299605	0.0858425	-3.49017	0.00048272	0.0179484	Wdr75
ENSMUSG00000028031	-2.16001	0.620345	-3.48195	0.000497785	0.0184695	Dkk2
ENSMUSG00000001891	-0.57511	0.165534	-3.47427	0.000512238	0.0189657	Ugp2
ENSMUSG00000049791	-0.824752	0.237562	-3.47173	0.000517118	0.0191062	Fzd4
ENSMUSG00000033788	1.06247	0.306118	3.47077	0.000518967	0.0191343	Dysf
ENSMUSG00000085705	1.73128	0.498944	3.46988	0.000520689	0.0191577	Gm16046
ENSMUSG00000036718	0.822624	0.237207	3.46795	0.000524438	0.0192553	Micall2
ENSMUSG00000089975	1.81446	0.523462	3.46628	0.000527723	0.0193355	Gm7420
ENSMUSG00000031559	2.45321	0.708163	3.46419	0.000531838	0.0194458	4930555F03Rik
ENSMUSG00000031767	1.97884	0.571978	3.45965	0.000540886	0.0196947	Nudt7
ENSMUSG00000039620	-1.03436	0.298951	-3.45998	0.000540221	0.0196947	6430573F11Rik
ENSMUSG00000006221	1.45077	0.419753	3.45625	0.000547748	0.0199034	Hspb7
ENSMUSG00000000632	-0.427885	0.123838	-3.45519	0.000549915	0.0199409	Sez6
ENSMUSG00000021242	0.379421	0.109909	3.45214	0.000556159	0.0200437	Npc2
ENSMUSG00000042807	-0.635605	0.184105	-3.4524	0.000555629	0.0200437	Hecw2
ENSMUSG00000055917	0.80154	0.232207	3.45183	0.000556807	0.0200437	Zfp277
ENSMUSG00000087186	-2.05585	0.595625	-3.45158	0.000557308	0.0200437	Gm16936
ENSMUSG00000039630	-0.295324	0.085588	-3.45053	0.000559481	0.0200808	Hnrnpu
ENSMUSG00000029836	-0.356601	0.103381	-3.44938	0.000561872	0.0201255	Cbx3
ENSMUSG00000029836	-0.356601	0.103381	-3.44938	0.000561872	0.0201255	Cbx3
ENSMUSG00000029836	-0.356601	0.103381	-3.44938	0.000561872	0.0201255	Cbx3
ENSMUSG00000045648	-1.20865	0.351088	-3.4426	0.000576154	0.020583	Vwc2l
ENSMUSG00000051401	-0.926199	0.269071	-3.44221	0.000576984	0.020583	Kctd16
ENSMUSG00000024921	-0.455283	0.132325	-3.44064	0.000580333	0.0206606	Smarca2
ENSMUSG00000034755	-0.949723	0.276845	-3.43052	0.000602426	0.0214038	Pcdh11x
ENSMUSG00000038214	0.449913	0.131312	3.4263	0.000611867	0.0216954	Bend3
ENSMUSG00000084865	-1.70932	0.499093	-3.42485	0.000615148	0.0217678	Gm15723
ENSMUSG00000042846	-0.887853	0.259291	-3.42415	0.00061673	0.02178	Lrrtm3
ENSMUSG00000031758	0.424909	0.124125	3.42324	0.000618786	0.0218088	Cdyl2
ENSMUSG00000006930	0.810916	0.237213	3.41851	0.000629647	0.0221472	Hap1
ENSMUSG00000036078	-0.423495	0.124022	-3.41468	0.000638578	0.0224165	Sigmar1
ENSMUSG00000028358	0.502356	0.147246	3.41168	0.00064563	0.0226189	Zfp618
ENSMUSG00000045876	-0.494216	0.145207	-3.40353	0.0006652	0.0232582	Pcdhb8
ENSMUSG00000027074	1.3353	0.392531	3.40178	0.000669484	0.0233615	Slc43a3
ENSMUSG00000050549	-0.791958	0.232935	-3.3999	0.000674098	0.023476	5730508B09Rik
ENSMUSG00000027230	-0.524903	0.154623	-3.39473	0.000686968	0.0238769	Creb3l1
ENSMUSG00000025314	-0.307084	0.090539	-3.39173	0.000694531	0.0239967	Ptprj
ENSMUSG00000042857	0.650348	0.191775	3.3912	0.000695874	0.0239967	Gm9776
ENSMUSG00000070174	-1.9425	0.572798	-3.39125	0.000695758	0.0239967
ENSMUSG00000073678	-0.607665	0.179169	-3.39157	0.000694943	0.0239967	Pgap1
ENSMUSG00000040548	-0.195935	0.0577925	-3.39032	0.00069812	0.0240271	Tex2
ENSMUSG00000040761	0.383419	0.11339	3.38143	0.000721088	0.0247691	Spen
ENSMUSG00000050244	-0.329737	0.0975554	-3.38	0.000724858	0.0248308	Heatr1
ENSMUSG00000075028	0.547983	0.162141	3.37968	0.000725707	0.0248308	Prdm11
ENSMUSG00000025221	-0.645907	0.191205	-3.37808	0.000729941	0.0249271	Kcnip2
ENSMUSG00000047414	-0.765067	0.226808	-3.37319	0.000743034	0.0253251	Flrt2
ENSMUSG00000040372	-0.801992	0.237869	-3.37158	0.000747393	0.0254244	Gpr63
ENSMUSG00000048878	0.485448	0.14404	3.37024	0.00075104	0.0254991	Hexim1
ENSMUSG00000060038	-0.373338	0.110912	-3.36608	0.000762441	0.0258363	Dhps
ENSMUSG00000040258	-0.934827	0.27807	-3.36184	0.000774259	0.0261863	Nxph4
ENSMUSG00000013076	0.423356	0.125962	3.361	0.000776617	0.0262157	Amotl1
ENSMUSG00000004455	-0.451386	0.134341	-3.36	0.000779419	0.0262407	Ppp1cc
ENSMUSG00000030208	-2.35043	0.699601	-3.35968	0.000780342	0.0262407	Emp1
ENSMUSG00000025094	-1.79547	0.534779	-3.35741	0.000786763	0.0264061	Slc18a2
ENSMUSG00000032534	0.447089	0.133212	3.35622	0.000790162	0.0264697	Cep63
ENSMUSG00000021090	1.03821	0.309556	3.35387	0.000796896	0.026594	Lrrc9
ENSMUSG00000027332	0.457529	0.136399	3.35434	0.000795533	0.026594	Ivd
ENSMUSG00000034330	1.21212	0.361801	3.35024	0.000807407	0.0267922	Plcg2
ENSMUSG00000048706	0.635663	0.189709	3.35073	0.000805987	0.0267922	D4Bwg0951e
ENSMUSG00000073209	-2.49241	0.743766	-3.35107	0.000805009	0.0267922	Klf14
ENSMUSG00000028794	1.09313	0.327067	3.34223	0.000831094	0.0275263	A3galt2
ENSMUSG00000060275	0.615115	0.184111	3.341	0.000834765	0.0275959	Nrg2
ENSMUSG00000026436	-0.461553	0.138224	-3.33916	0.000840308	0.0276901	Elk4
ENSMUSG00000028957	0.880594	0.263729	3.33901	0.000840764	0.0276901	Per3
ENSMUSG00000026254	-0.206438	0.0618715	-3.33655	0.000848238	0.0278436	Eif4e2
ENSMUSG00000042354	-0.355143	0.106444	-3.33644	0.00084859	0.0278436	Gnl3
ENSMUSG00000036298	-0.591594	0.177457	-3.33373	0.000856884	0.0280112	Slc2a13
ENSMUSG00000037375	1.04451	0.313298	3.33392	0.000856298	0.0280112	Hhat
ENSMUSG00000020638	0.554117	0.166412	3.32979	0.000869109	0.0283581	Cmpk2
ENSMUSG00000046722	-0.436652	0.131173	-3.32882	0.00087216	0.0284049	Cdc42se1
ENSMUSG00000042997	-0.365491	0.109833	-3.3277	0.000875676	0.0284667	Nhlrc3
ENSMUSG00000011096	-0.395979	0.119048	-3.32622	0.000880309	0.0285172	Akt1s1
ENSMUSG00000045594	0.41573	0.124987	3.32617	0.000880469	0.0285172	Glb1
ENSMUSG00000053644	0.380801	0.114537	3.32471	0.00088509	0.0286141	Aldh7a1
ENSMUSG00000057554	0.491076	0.147829	3.32191	0.000894032	0.0288487	Lgals8
ENSMUSG00000086448	0.803125	0.241802	3.32141	0.000895628	0.0288487	9330162012Rik
ENSMUSG00000085444	2.52848	0.761486	3.32046	0.000898693	0.0288945	Gm13936
ENSMUSG00000027965	-0.758109	0.22854	-3.31719	0.000909292	0.0291288	Olfm3
ENSMUSG00000039835	0.619634	0.186783	3.31741	0.000908572	0.0291288	Nhsl1
ENSMUSG00000035623	0.260581	0.0785858	3.31588	0.000913564	0.0291594	Rsf1
ENSMUSG00000061461	-0.492659	0.14856	-3.31622	0.00091243	0.0291594	1810013D10Rik
ENSMUSG00000033342	-0.619703	0.186934	-3.31508	0.000916157	0.0291892	4833424O15Rik
ENSMUSG00000040035	0.363542	0.109833	3.30995	0.00093312	0.0296223	Disp2
ENSMUSG00000071424	-0.727235	0.219704	-3.31007	0.000932737	0.0296223	Grid2
ENSMUSG00000033960	-0.734609	0.222157	-3.30671	0.000943986	0.0299133	9430020K01Rik
ENSMUSG00000061313	0.274729	0.0831414	3.30436	0.000951937	0.030111	Ddhd2
ENSMUSG00000085370	1.18424	0.358654	3.3019	0.000960307	0.0303212	2310002F09Rik
ENSMUSG00000091686	1.75117	0.530851	3.29881	0.00097097	0.030603	4930471C04Rik
ENSMUSG00000027011	-0.440941	0.133693	-3.29816	0.00097321	0.0306187	Ube2e3
ENSMUSG00000027669	-0.682109	0.20694	-3.29617	0.00098014	0.0307268	Gnb4
ENSMUSG00000063260	-1.42783	0.433128	-3.29656	0.00097877	0.0307268	Syt10
ENSMUSG00000028883	-0.534713	0.162313	-3.29434	0.000986531	0.0308721	Sema3a
ENSMUSG00000056755	-0.770245	0.233859	-3.29363	0.000989013	0.0308948	Grm7
ENSMUSG00000020484	-0.375565	0.114079	-3.29215	0.000994233	0.0309833	Xbp1
ENSMUSG00000032575	-0.343465	0.104338	-3.29183	0.00099537	0.0309833	Manf
ENSMUSG00000020375	0.371312	0.112865	3.28988	0.00100229	0.0310793	Rufy1
ENSMUSG00000032437	-0.34456	0.104727	-3.29007	0.00100162	0.0310793	Stt3b
ENSMUSG00000033730	-1.71668	0.52187	-3.28947	0.00100375	0.0310793	Egr3
ENSMUSG00000003528	-0.283796	0.0863192	-3.28775	0.00100992	0.0312154	Slc25a1
ENSMUSG00000038729	1.48217	0.451199	3.28495	0.00102	0.0314716	Akap2
ENSMUSG00000020701	0.769189	0.234272	3.28332	0.00102592	0.0315987	Tmem132e
ENSMUSG00000027395	-0.393172	0.11979	-3.28217	0.00103012	0.0316725	Polr1b
ENSMUSG00000032527	0.348082	0.106084	3.28118	0.00103373	0.0317282	Pccb
ENSMUSG00000026632	0.590276	0.180359	3.27278	0.00106495	0.0326294	Tatdn3
ENSMUSG00000024535	0.464802	0.142139	3.27005	0.00107529	0.0328891	Snx24
ENSMUSG00000042429	-0.623207	0.190622	-3.26933	0.00107802	0.032915	Adora1
ENSMUSG00000085445	1.88458	0.576801	3.2673	0.0010858	0.0330953	Gm16348
ENSMUSG00000049511	-1.30888	0.400848	-3.26529	0.00109354	0.0332735	Htr1b
ENSMUSG00000017978	-1.63115	0.499948	-3.26264	0.0011038	0.0335277	Cadps2
ENSMUSG00000063730	1.01437	0.311361	3.25787	0.00112254	0.0339794	Hsd3b2
ENSMUSG00000092448	-0.97506	0.299266	-3.25817	0.00112133	0.0339794	Gm20387
ENSMUSG00000063229	-0.598911	0.18496	-3.23805	0.00120349	0.0363672	Ldha
ENSMUSG00000021224	-0.738124	0.228583	-3.22913	0.00124168	0.0374211	Numb
ENSMUSG00000049775	-0.502277	0.155556	-3.22891	0.00124262	0.0374211	Tmsb4x
ENSMUSG00000037362	-0.690379	0.213866	-3.22809	0.00124621	0.0374651	Nov
ENSMUSG00000001017	-0.345061	0.107011	-3.22454	0.00126176	0.0378678	2500003M10Rik
ENSMUSG00000020571	-0.283501	0.0880424	-3.22005	0.00128168	0.038205	Pdia6
ENSMUSG00000036106	0.444433	0.137972	3.22118	0.00127662	0.038205	Prr5
ENSMUSG00000044468	1.8345	0.569661	3.22033	0.00128042	0.038205	Fam46c
ENSMUSG00000055447	-0.480312	0.149129	-3.22079	0.00127838	0.038205	Cd47
ENSMUSG00000028076	1.33503	0.414901	3.21772	0.00129214	0.0384515	Cd1d1
ENSMUSG00000034612	-0.393342	0.122363	-3.21455	0.00130649	0.0388129	Chst11
ENSMUSG00000034295	-0.339105	0.105508	-3.21403	0.00130887	0.0388181	Fhod3
ENSMUSG00000035873	-1.59948	0.498441	-3.20897	0.00133212	0.0394411	Pawr
ENSMUSG00000028701	-0.898903	0.28022	-3.20785	0.00133733	0.0395287	1520402A15Rik
ENSMUSG00000090353	1.17461	0.366309	3.2066	0.00134312	0.0396332	Gm17555
ENSMUSG00000048769	0.833409	0.260131	3.20381	0.00135624	0.0399535	H1f0
ENSMUSG00000055065	-0.189082	0.0590404	-3.20258	0.001362	0.0400263	Ddx17
ENSMUSG00000086471	2.92399	0.913087	3.20232	0.00136327	0.0400263	A530020G20Rik
ENSMUSG00000020620	0.496067	0.154948	3.2015	0.00136713	0.040073	Abca8b
ENSMUSG00000021453	-1.1531	0.360707	-3.19677	0.00138978	0.0406061	Gadd45g
ENSMUSG00000023800	-0.373223	0.116751	-3.19673	0.00138994	0.0406061	Tiam2
ENSMUSG00000028838	1.17671	0.368552	3.1928	0.001409	0.0410946	Extl1
ENSMUSG00000046613	0.607967	0.1905	3.19143	0.00141572	0.0412223	Vwa5b2
ENSMUSG00000036264	-1.30792	0.410019	-3.18989	0.00142326	0.0413733	Fstl4
ENSMUSG00000037278	-0.669778	0.210001	-3.1894	0.00142571	0.0413761	Tmem97
ENSMUSG00000031093	0.554948	0.174091	3.18769	0.00143416	0.041516	Dock11
ENSMUSG00000031358	-0.399189	0.125237	-3.18747	0.00143525	0.041516	Msl3
ENSMUSG00000030889	0.718433	0.225442	3.18678	0.00143867	0.0415466	Vwa3a
ENSMUSG00000036766	-0.254116	0.0798177	-3.1837	0.00145406	0.0419222	Dner
ENSMUSG00000061331	1.21572	0.382359	3.17952	0.00147518	0.0424615	Gm17132
ENSMUSG00000037279	-1.29131	0.406602	-3.17585	0.00149399	0.0429328	Ovol2
ENSMUSG00000036995	1.01514	0.319711	3.17519	0.00149739	0.0429601	Asap3
ENSMUSG00000022037	-0.467227	0.147206	-3.17396	0.00150374	0.0430722	Clu
ENSMUSG00000033285	-0.261248	0.0823259	-3.17334	0.00150697	0.0430945	Wdr3
ENSMUSG00000066510	1.30163	0.410511	3.17074	0.00152049	0.0433402	Ankdd1a
ENSMUSG00000075783	0.731844	0.230794	3.17098	0.00151926	0.0433402
ENSMUSG00000062859	0.976338	0.308235	3.16751	0.00153749	0.0437539	Tcp11
ENSMUSG00000036879	-0.5295	0.16724	-3.16612	0.00154489	0.0438934	Phkb
ENSMUSG00000052613	-1.06162	0.335478	-3.16449	0.00155354	0.0440678	Pcdh15
ENSMUSG00000053819	-0.629908	0.199116	-3.16353	0.00155869	0.0441429	Camk2d
ENSMUSG00000036473	0.292456	0.0924739	3.16258	0.0015638	0.0441489	Tbc1d24
ENSMUSG00000060798	0.672642	0.212689	3.16255	0.00156393	0.0441489	Intu
ENSMUSG00000020901	-1.25163	0.396488	-3.15679	0.00159517	0.0447072	Pik3r5
ENSMUSG00000024533	-0.299604	0.0949305	-3.15603	0.0015993	0.0447072	Spire1
ENSMUSG00000027955	-1.40343	0.444751	-3.15555	0.00160196	0.0447072	Fam198b
ENSMUSG00000042156	0.33678	0.106714	3.1559	0.00160005	0.0447072	Dzip1
ENSMUSG00000046844	0.354288	0.112224	3.15699	0.00159408	0.0447072	Vat1l
ENSMUSG00000056025	1.15161	0.364991	3.15517	0.00160404	0.0447072	Clca1
ENSMUSG00000074000	1.45518	0.460775	3.15811	0.00158796	0.0447072	Gm10606
ENSMUSG00000082078	2.02051	0.640273	3.15571	0.00160108	0.0447072	Gm12098
ENSMUSG00000090361	1.12566	0.356825	3.15467	0.00160682	0.0447139	Gm17621
ENSMUSG00000027709	0.640915	0.203273	3.15298	0.00161614	0.0448877	Mccc1
ENSMUSG00000087548	1.1937	0.37864	3.15261	0.00161817	0.0448877	1700028E10Rik
ENSMUSG00000064498	-1.72906	0.548831	-3.15045	0.00163018	0.0451497
ENSMUSG00000060371	-0.42602	0.135343	-3.1477	0.0016456	0.0455051	Caln1
ENSMUSG00000042349	1.04061	0.330808	3.14564	0.00165721	0.0457541	Ikbke
ENSMUSG00000001763	0.536109	0.170478	3.14474	0.00166234	0.0458238	Tspan33
ENSMUSG00000032577	-0.91965	0.292536	-3.14372	0.00166815	0.0459119	Mapkapk3
ENSMUSG00000031642	-0.455388	0.144909	-3.14257	0.0016747	0.0460202	Sh3rf1
ENSMUSG00000075894	1.43113	0.455588	3.14128	0.00168211	0.0461517
ENSMUSG00000042622	-1.24656	0.397079	-3.13933	0.00169337	0.0463883	Maff
ENSMUSG00000037795	0.524112	0.167102	3.13648	0.00170988	0.0467679	N4bp2
ENSMUSG00000027314	0.851975	0.27171	3.1356	0.00171502	0.0467905	Dll4
ENSMUSG00000038530	-0.963179	0.307192	-3.13543	0.00171603	0.0467905	Rgs4
ENSMUSG00000029344	-0.47177	0.150877	-3.12684	0.00176694	0.0481039	Tpst2
ENSMUSG00000023988	-0.318304	0.10185	-3.12523	0.00177664	0.0482933	Bysl
ENSMUSG00000021371	0.508103	0.162637	3.12414	0.00178323	0.0483977	Ccdc90a
ENSMUSG00000062078	-0.642238	0.205609	-3.12359	0.00178661	0.0484147	Qk
ENSMUSG00000075900	-6.39329	2.04804	-3.12166	0.00179832	0.0486569	n-R5s114
ENSMUSG00000017670	0.274471	0.0879875	3.11943	0.00181201	0.0487344	Elmo2
ENSMUSG00000024150	-0.317344	0.10172	-3.11979	0.00180981	0.0487344	Mcfd2
ENSMUSG00000026736	2.12048	0.679655	3.11993	0.00180892	0.0487344	4930426L09Rik
ENSMUSG00000085527	0.822615	0.26371	3.11939	0.00181227	0.0487344	Gm15535
ENSMUSG00000021701	-0.687864	0.220611	-3.11799	0.00182089	0.0488915	Plk2
ENSMUSG00000041977	0.43251	0.138796	3.11615	0.00183232	0.0491234	Arhgef11
ENSMUSG00000001642	-0.381239	0.12239	-3.11497	0.00183966	0.0491603	Akr1b3
ENSMUSG00000018040	-0.294563	0.0945547	-3.11527	0.00183778	0.0491603	Rrp7a
ENSMUSG00000041633	1.1907	0.382298	3.11458	0.00184208	0.0491603	Kctd12b
ENSMUSG00000050711	-1.17826	0.378511	-3.11288	0.00185273	0.0493698	Scg2
ENSMUSG00000070342	1.18064	0.379395	3.1119	0.00185887	0.0494584	Gm10287
ENSMUSG00000024085	-0.47144	0.151541	-3.11098	0.00186465	0.0495371	Man2a1
ENSMUSG00000046991	0.954069	0.307216	3.10554	0.00189935	0.0503828	Wdr27
ENSMUSG00000020657	-0.329881	0.106335	-3.10227	0.00192043	0.0507045	Dnajc27
ENSMUSG00000030094	0.501427	0.161653	3.10187	0.001923	0.0507045	Xpc
ENSMUSG00000064489	-1.73397	0.558988	-3.10199	0.00192224	0.0507045
ENSMUSG00000091655	-0.571229	0.184089	-3.103	0.00191571	0.0507045	Gm8741
ENSMUSG00000025425	-0.684443	0.220876	-3.09877	0.00194327	0.0511621	St8sia5
ENSMUSG00000024912	-1.74576	0.564262	-3.09389	0.00197552	0.051856	Fosl1
ENSMUSG00000047747	0.303225	0.0979966	3.09424	0.00197318	0.051856	Rnf150
ENSMUSG00000041540	-0.410888	0.133245	-3.08369	0.0020445	0.0535866	Sox5
ENSMUSG00000044548	-0.609828	0.197905	-3.08141	0.00206021	0.053918	Dact1
ENSMUSG00000033491	-1.01183	0.328448	-3.08064	0.00206557	0.053978	Prss35
ENSMUSG00000038984	-0.373673	0.121374	-3.0787	0.00207902	0.054249	Tspyl5
ENSMUSG00000026749	0.412211	0.133918	3.0781	0.00208328	0.0542793	Nek6
ENSMUSG00000007682	-1.38553	0.450415	-3.07611	0.00209718	0.0545607	Dio2
ENSMUSG00000022696	-0.683274	0.222194	-3.07512	0.00210416	0.054581	Sidt1
ENSMUSG00000031299	-0.274779	0.0893486	-3.07536	0.0021025	0.054581	Pdha1
ENSMUSG00000044768	-0.289526	0.0941973	-3.07361	0.00211485	0.0547774	D1Ertd622e
ENSMUSG00000065573	1.72014	0.559995	3.0717	0.00212842	0.0549824	Mir350
ENSMUSG00000077440	-1.14333	0.372223	-3.07162	0.00212902	0.0549824
ENSMUSG00000030302	-0.295773	0.0963474	-3.06986	0.00214161	0.0552266	Atp2b2
ENSMUSG00000020601	-0.563627	0.183631	-3.06934	0.00214536	0.0552421	Trib2
ENSMUSG00000037014	-0.852167	0.277993	-3.06542	0.00217361	0.0558879	Sstr4
ENSMUSG00000066026	-1.99906	0.652305	-3.06462	0.0021795	0.0559575	Dhrs3
ENSMUSG00000066878	-0.405107	0.132259	-3.06298	0.00219148	0.0561012	Gm10184
ENSMUSG00000069083	-0.405107	0.132259	-3.06298	0.00219148	0.0561012	Gm10259
ENSMUSG00000019952	-0.501116	0.163691	-3.06135	0.00220345	0.0561695	Poc1b
ENSMUSG00000039770	0.456417	0.149092	3.06131	0.00220373	0.0561695	Ypel5
ENSMUSG00000052565	0.629473	0.2056	3.06164	0.00220125	0.0561695	Hist1h1d
ENSMUSG00000075999	-4.55855	1.48956	-3.06033	0.00221097	0.0562725	n-R5s124
ENSMUSG00000037492	-1.13712	0.371732	-3.05898	0.0022209	0.0564065	Zmat4
ENSMUSG00000040605	-1.52753	0.499398	-3.05875	0.00222265	0.0564065	Bace2
ENSMUSG00000075858	-4.58827	1.50057	-3.05769	0.00223049	0.0565239	n-R5s113
ENSMUSG00000051359	-0.390713	0.12781	-3.05698	0.00223581	0.0565772	Ncald
ENSMUSG00000075788	-6.23226	2.03989	-3.0552	0.00224913	0.0568326	n-R5s131
ENSMUSG00000003518	-0.569209	0.186517	-3.05178	0.00227487	0.0573204	Dusp3
ENSMUSG00000090863	-1.46967	0.481579	-3.05177	0.00227496	0.0573204	A530084C06Rik
ENSMUSG00000053317	-0.417824	0.136947	-3.05099	0.00228088	0.0573874	Sec61b
ENSMUSG00000001627	-0.79244	0.260105	-3.04661	0.00231437	0.0577242	Ifrd1
ENSMUSG00000010025	0.357332	0.117312	3.04599	0.00231915	0.0577242	Aldh3a2
ENSMUSG00000030638	0.384208	0.126196	3.04454	0.00233037	0.0577242	Sh3gl3
ENSMUSG00000030849	-0.98572	0.323601	-3.04609	0.00231836	0.0577242	Fgfr2
ENSMUSG00000036875	0.701429	0.230379	3.04467	0.00232937	0.0577242	Dna2
ENSMUSG00000039671	0.463267	0.152105	3.0457	0.00232141	0.0577242	Zmynd8
ENSMUSG00000067049	1.53634	0.504185	3.04718	0.00231	0.0577242	Unc93a
ENSMUSG00000071324	0.517085	0.169717	3.04676	0.00231324	0.0577242	Armc2
ENSMUSG00000075747	-4.5162	1.4823	-3.04674	0.00231335	0.0577242	n-R5s110
ENSMUSG00000089855	-5.53197	1.81539	-3.04725	0.00230944	0.0577242	Gm15662
ENSMUSG00000093187	1.15118	0.378027	3.04523	0.002325	0.0577242	Mir344-2
ENSMUSG00000031808	0.562297	0.184977	3.03983	0.00236713	0.0584161	Slc27a1
ENSMUSG00000041674	-2.15725	0.709694	-3.03968	0.00236826	0.0584161	BC006965
ENSMUSG00000081590	1.69229	0.556659	3.04008	0.00236519	0.0584161	Gm14413
ENSMUSG00000065675	-1.82561	0.600828	-3.03849	0.00237763	0.058565
ENSMUSG00000073240	-0.490113	0.161525	-3.0343	0.00241097	0.0593032	2410017P09Rik
ENSMUSG00000092392	2.26655	0.747258	3.03316	0.00242006	0.0594437	Gm20546
ENSMUSG00000046541	0.427107	0.140942	3.03038	0.00244246	0.0599102	Zfp526
ENSMUSG00000020599	0.395962	0.130709	3.02935	0.00245082	0.0600315	Rgs9
ENSMUSG00000025754	1.21466	0.401031	3.02884	0.00245499	0.0600498	Agbl1
ENSMUSG00000055723	-0.327541	0.108184	-3.02762	0.00246489	0.0602085	Rras2
ENSMUSG00000037349	0.623565	0.206212	3.0239	0.00249535	0.0608678	Nudt22
ENSMUSG00000030695	-0.432037	0.142995	-3.02133	0.00251664	0.0611328	Aldoa
ENSMUSG00000030695	-0.432037	0.142995	-3.02133	0.00251664	0.0611328	Aldoa
ENSMUSG00000032394	0.975946	0.322999	3.02151	0.00251517	0.0611328	Igdcc3
ENSMUSG00000090320	1.06777	0.353364	3.02173	0.00251334	0.0611328	Gm17385
ENSMUSG00000045382	-0.8326	0.275815	-3.01869	0.00253869	0.0615833	Cxcr4
ENSMUSG00000034098	-0.839018	0.278	-3.01805	0.0025441	0.0616296	Fstl5
ENSMUSG00000090299	1.07142	0.355138	3.01692	0.00255354	0.0617196	Gm17295
ENSMUSG00000091838	1.06752	0.353863	3.01677	0.00255483	0.0617196	Gm17316
ENSMUSG00000018166	1.27367	0.422663	3.01344	0.00258305	0.0618231	Erbb3
ENSMUSG00000023951	-0.782216	0.259542	-3.01383	0.00257968	0.0618231	Vegfa
ENSMUSG00000036403	0.421104	0.139709	3.01415	0.002577	0.0618231	Cep135
ENSMUSG00000041781	-0.203436	0.0674738	-3.01504	0.00256944	0.0618231	Cpsf2
ENSMUSG00000074785	1.02094	0.338793	3.01345	0.00258293	0.0618231	Plxnc1
ENSMUSG00000079722	0.930592	0.3086	3.01553	0.0025653	0.0618231	Ttll2
ENSMUSG00000086480	1.59262	0.528521	3.01336	0.00258373	0.0618231	Gm15287
ENSMUSG00000049583	-0.630135	0.209148	-3.01286	0.00258798	0.0618407	Grm5
ENSMUSG00000047643	-1.02844	0.341479	-3.01172	0.00259773	0.0619896	Gm5454
ENSMUSG00000027201	-0.303434	0.100841	-3.00905	0.00262068	0.0624523	Myef2
ENSMUSG00000029723	0.637739	0.212212	3.00519	0.00265412	0.0631639	Tsc22d4
ENSMUSG00000022426	-0.264959	0.088272	-3.00162	0.00268549	0.0638239	Josd1
ENSMUSG00000022426	-0.264959	0.088272	-3.00162	0.00268549	0.0638239	Josd1
ENSMUSG00000058906	1.01232	0.33758	2.99877	0.00271075	0.0643373	Zfp353
ENSMUSG00000039065	0.509993	0.170143	2.99744	0.00272257	0.0645309	Fam173b
ENSMUSG00000001143	0.339271	0.113262	2.99544	0.0027405	0.0648683	Lman2l
ENSMUSG00000002014	-0.428117	0.143053	-2.99271	0.00276516	0.0653641	Ssr4
ENSMUSG00000003657	-0.772515	0.258464	-2.98887	0.00280014	0.0656789	Calb2
ENSMUSG00000021798	0.53807	0.179948	2.99015	0.00278844	0.0656789	Ldb3
ENSMUSG00000027207	0.393211	0.131562	2.98879	0.00280089	0.0656789	Galk2
ENSMUSG00000060402	-0.601427	0.201191	-2.98933	0.00279591	0.0656789	Chst8
ENSMUSG00000066113	0.639924	0.213972	2.99069	0.0027835	0.0656789	Adamtsl1
ENSMUSG00000090290	0.70967	0.237373	2.98969	0.00279264	0.0656789	Gm17296
ENSMUSG00000075774	-4.39154	1.47076	-2.9859	0.00282743	0.0662132	n-R5s121
ENSMUSG00000022622	1.05196	0.353045	2.97968	0.00288549	0.0673932	Acr
ENSMUSG00000040717	0.657883	0.220785	2.97975	0.00288482	0.0673932	Il17rd
ENSMUSG00000019960	-0.915177	0.307273	-2.97839	0.00289771	0.0674854	Dusp6
ENSMUSG00000038412	-0.557128	0.187037	-2.97871	0.00289469	0.0674854	Higd1a
ENSMUSG00000059810	0.417747	0.140275	2.97804	0.00290095	0.0674854	Rgs3
ENSMUSG00000022788	0.58674	0.197159	2.97597	0.00292062	0.0677653	Fgd4
ENSMUSG00000032649	-0.908364	0.305309	-2.97522	0.00292776	0.0677653	Glt25d2
ENSMUSG00000075942	-4.64906	1.56263	-2.97516	0.00292839	0.0677653	n-R5s136
ENSMUSG00000085180	1.7562	0.590274	2.97522	0.00292777	0.0677653	AI838599
ENSMUSG00000028072	-1.80513	0.607238	-2.97269	0.00295206	0.0682231	Ntrk1
ENSMUSG00000013663	-0.440723	0.14828	-2.97224	0.00295637	0.0682332	Pten
ENSMUSG00000040350	0.671936	0.226224	2.97023	0.00297578	0.0684378	Trim7
ENSMUSG00000056222	-0.408369	0.137479	-2.9704	0.00297412	0.0684378	Spock1
ENSMUSG00000057886	-0.429519	0.144653	-2.96931	0.00298469	0.0684378	Gm6984
ENSMUSG00000057886	-0.429519	0.144653	-2.96931	0.00298469	0.0684378	Gm6984
ENSMUSG00000057886	-0.429519	0.144653	-2.96931	0.00298469	0.0684378	Gm6984
ENSMUSG00000075718	-4.28098	1.44163	-2.96954	0.00298251	0.0684378	n-R5s122
ENSMUSG00000093099	-4.38823	1.47758	-2.96988	0.00297919	0.0684378	Rn5s
ENSMUSG00000068263	0.740975	0.249634	2.96824	0.00299509	0.0685867	Ccdc48
ENSMUSG00000065926	-1.49833	0.505596	-2.96348	0.00304179	0.0695655
ENSMUSG00000035864	-0.433395	0.14628	-2.96278	0.00304877	0.0696347	Syt1
ENSMUSG00000035429	0.81876	0.276391	2.96233	0.00305324	0.0696464	Ptprh
ENSMUSG00000075955	-4.42105	1.49306	-2.96107	0.0030657	0.0698399	n-R5s105
ENSMUSG00000031139	0.64655	0.218494	2.95912	0.00308523	0.0700682	Mcf2
ENSMUSG00000048285	-1.13685	0.384182	-2.95915	0.00308494	0.0700682	Frmd6
ENSMUSG00000081471	0.933377	0.31545	2.95887	0.00308767	0.0700682	Gm14735
ENSMUSG00000074877	1.52676	0.516777	2.95439	0.0031329	0.0710029	Gm10780
ENSMUSG00000008496	0.737834	0.249992	2.95143	0.00316306	0.0713539	Pou2f2
ENSMUSG00000019979	0.243882	0.0826583	2.95049	0.00317273	0.0713539	Apaf1
ENSMUSG00000021756	0.437404	0.148237	2.95071	0.0031704	0.0713539	Il6st
ENSMUSG00000022370	0.396788	0.134453	2.95113	0.00316613	0.0713539	Mrpl13
ENSMUSG00000022389	0.472302	0.160031	2.95132	0.00316421	0.0713539	Tef
ENSMUSG00000045903	-1.65265	0.559937	-2.95149	0.00316249	0.0713539	Npas4
ENSMUSG00000057228	-1.17651	0.398967	-2.9489	0.00318907	0.0715385	Aadat
ENSMUSG00000074736	-0.853496	0.289426	-2.94893	0.00318875	0.0715385	Tmem90b
ENSMUSG00000029055	0.446689	0.151518	2.9481	0.00319731	0.0716319	Plch2
ENSMUSG00000046562	-0.444545	0.150919	-2.94559	0.00322341	0.0721249	Unc119b
ENSMUSG00000085328	0.996333	0.338297	2.94515	0.00322802	0.0721362	Gm17131
ENSMUSG00000029163	1.05338	0.357744	2.9445	0.00323475	0.0721601	Emilin1
ENSMUSG00000065501	-1.94572	0.660939	-2.94387	0.0032414	0.0721601	Mir335
ENSMUSG00000087540	1.78935	0.607749	2.94423	0.00323758	0.0721601	Gm11412
ENSMUSG00000075836	-4.3129	1.46567	-2.94262	0.00325449	0.0723599	n-R5s103
ENSMUSG00000001270	-0.329279	0.111918	-2.94213	0.0032596	0.072382	Ckb
ENSMUSG00000075871	-4.33031	1.47321	-2.93937	0.0032888	0.0729384	n-R5s108
ENSMUSG00000006442	-0.370751	0.126205	-2.9377	0.00330659	0.0732406	Srm
ENSMUSG00000020263	0.698287	0.237792	2.93655	0.00331887	0.0734201	Appl2
ENSMUSG00000052102	0.402739	0.137211	2.93519	0.00333346	0.0736503	Gnpda1
ENSMUSG00000034452	1.59704	0.544179	2.93478	0.00333785	0.0736546	Slc24a1
ENSMUSG00000028262	1.86905	0.637547	2.93163	0.00337184	0.0743115	Clca2
ENSMUSG00000026383	0.394657	0.134676	2.93043	0.00338492	0.0744196	Epb4.1l5
ENSMUSG00000075962	-6.29705	2.14887	-2.9304	0.00338521	0.0744196	n-R5s101
ENSMUSG00000033981	-0.499012	0.17041	-2.9283	0.00340826	0.0748328	Gria2
ENSMUSG00000075872	-5.71971	1.95358	-2.92781	0.00341354	0.0748553	n-R5s129
ENSMUSG00000091956	-1.79577	0.613893	-2.92521	0.00344224	0.0753907	C2cd4b
ENSMUSG00000022517	0.239014	0.0818132	2.92146	0.00348397	0.0760206	Mgrn1
ENSMUSG00000039046	-0.381671	0.130641	-2.92152	0.00348331	0.0760206	Usp6nl
ENSMUSG00000039887	-0.432661	0.148069	-2.92203	0.00347756	0.0760206	Alg14
ENSMUSG00000039908	0.738146	0.253039	2.91713	0.00353272	0.0769888	Slc26a11
ENSMUSG00000021629	-0.255948	0.0878054	-2.91494	0.00355751	0.0774332	Slc30a5
ENSMUSG00000093103	-4.27205	1.46689	-2.91232	0.00358756	0.0779907
ENSMUSG00000075799	-4.23445	1.45457	-2.91113	0.00360125	0.0781915	n-R5s100
ENSMUSG00000090671	1.7209	0.591431	2.90972	0.00361755	0.0784485	Gm5067
ENSMUSG00000026610	-0.691835	0.237807	-2.90923	0.00362326	0.0784757	Esrrg
ENSMUSG00000030898	-1.03621	0.356302	-2.90823	0.00363476	0.0785692	Cckbr
ENSMUSG00000075921	-4.33267	1.48987	-2.90808	0.00363651	0.0785692	n-R5s111
ENSMUSG00000031841	-0.411028	0.141359	-2.90769	0.00364106	0.0785709	Cdh13
ENSMUSG00000027809	-0.404509	0.139218	-2.90558	0.00366575	0.0790067	Etfdh
ENSMUSG00000074365	1.20937	0.416561	2.90323	0.0036934	0.0795052	Crxos1
ENSMUSG00000061311	1.02841	0.354349	2.90224	0.00370509	0.0796594	Rag1
ENSMUSG00000020186	-0.592182	0.204213	-2.89983	0.00373369	0.0801764	Csrp2
ENSMUSG00000041798	0.770159	0.265681	2.89881	0.0037458	0.0803382	Gck
ENSMUSG00000054976	0.619859	0.213881	2.89816	0.00375365	0.0804086	9430031J16Rik
ENSMUSG00000018761	-0.389284	0.134363	-2.89726	0.00376441	0.080541	Mpdu1
ENSMUSG00000029054	-0.570325	0.196877	-2.89687	0.0037691	0.0805434	Gabrd
ENSMUSG00000092944	1.2042	0.415797	2.89611	0.00377815	0.0806388
ENSMUSG00000033147	0.38305	0.132479	2.89141	0.00383515	0.0814599	Slc22a15
ENSMUSG00000037428	-1.13199	0.391455	-2.89176	0.00383091	0.0814599	Vgf
ENSMUSG00000049001	-0.740923	0.256243	-2.89148	0.00383427	0.0814599	A930038C07Rik
ENSMUSG00000075965	-4.2072	1.45467	-2.89219	0.00382561	0.0814599	n-R5s134
ENSMUSG00000039911	-0.722174	0.249823	-2.89074	0.00384337	0.0815359	Spsb1
ENSMUSG00000053552	0.380393	0.131673	2.88892	0.00386569	0.0819108	Ebf4
ENSMUSG00000022018	-1.66722	0.577443	-2.88725	0.0038863	0.0819664	1190002H23Rik
ENSMUSG00000044690	-1.79026	0.620069	-2.88719	0.00388696	0.0819664	Gm4798
ENSMUSG00000075780	-1.71325	0.593344	-2.88745	0.00388372	0.0819664
ENSMUSG00000093226	-0.772314	0.267394	-2.8883	0.00387333	0.0819664
ENSMUSG00000075802	-4.27229	1.48002	-2.88663	0.00389386	0.0820136	n-R5s117
ENSMUSG00000025453	0.360233	0.124817	2.88608	0.00390074	0.0820601	Nnt
ENSMUSG00000038855	0.641898	0.222484	2.88514	0.00391242	0.0821094	Itpkb
ENSMUSG00000043458	-0.49584	0.171838	-2.88551	0.00390783	0.0821094	Pcdhb12
ENSMUSG00000092962	-4.1893	1.45292	-2.88336	0.00393455	0.0824754
ENSMUSG00000056515	0.327848	0.113914	2.87803	0.00400171	0.0837834	Rab31
ENSMUSG00000075334	-0.710716	0.247152	-2.87562	0.0040323	0.0843235	Rprm
ENSMUSG00000030067	-0.559772	0.194821	-2.87326	0.00406256	0.0848554	Foxp1
ENSMUSG00000042035	0.421079	0.146602	2.87226	0.00407546	0.0850238	Igsf3
ENSMUSG00000000202	0.780418	0.271833	2.87095	0.00409239	0.0852759	Btbd17
ENSMUSG00000029335	-0.66264	0.230956	-2.86912	0.00411619	0.085569	Bmp3
ENSMUSG00000034708	0.440175	0.153415	2.86919	0.0041153	0.085569	Grn
ENSMUSG00000075811	-4.25857	1.48497	-2.86778	0.00413359	0.0858293	n-R5s139
ENSMUSG00000030321	1.02602	0.357913	2.86669	0.00414792	0.0858506	BC060267
ENSMUSG00000059203	-0.872533	0.304361	-2.86677	0.00414689	0.0858506	Il1rapl2
ENSMUSG00000075949	-5.7835	2.01756	-2.86659	0.00414926	0.0858506	n-R5s119
ENSMUSG00000025132	-0.261728	0.0913215	-2.866	0.00415693	0.0858962	Arhgdia
ENSMUSG00000055421	-0.65942	0.23014	-2.8653	0.00416612	0.0858962	Pcdh9
ENSMUSG00000075735	-4.16039	1.45183	-2.86562	0.00416194	0.0858962	n-R5s104
ENSMUSG00000019947	0.462256	0.161366	2.86465	0.00417469	0.0859722	Arid5b
ENSMUSG00000009575	-0.280541	0.0979973	-2.86275	0.00419986	0.0863894	Cbx5
ENSMUSG00000032741	0.567642	0.198356	2.86174	0.00421323	0.0864832	Tpcn1
ENSMUSG00000075905	-4.21223	1.47195	-2.86166	0.00421425	0.0864832	n-R5s128
ENSMUSG00000022887	0.669287	0.23395	2.86081	0.00422559	0.0865139	Masp1
ENSMUSG00000030647	-0.490959	0.171615	-2.86081	0.00422554	0.0865139	Ndufc2
ENSMUSG00000030647	-0.490959	0.171615	-2.86081	0.00422554	0.0865139	Ndufc2
ENSMUSG00000030647	-0.490959	0.171615	-2.86081	0.00422554	0.0865139	Ndufc2
ENSMUSG00000050459	0.968546	0.338752	2.85916	0.00424765	0.0868645	Gm17646
ENSMUSG00000025479	0.899862	0.31491	2.85752	0.0042697	0.0871129	Cyp2e1
ENSMUSG00000032323	1.1023	0.385747	2.85758	0.00426882	0.0871129	Cyp11a1
ENSMUSG00000038175	-0.47352	0.165761	-2.85663	0.00428161	0.0872545	Mylip
ENSMUSG00000051855	-0.679211	0.237919	-2.8548	0.00430636	0.0876574	Mest
ENSMUSG00000075765	-4.27871	1.49921	-2.85398	0.00431752	0.0877829	n-R5s138
ENSMUSG00000087038	-0.694729	0.2435	-2.8531	0.00432953	0.0879254	2900079G21Rik
ENSMUSG00000056148	0.664318	0.232931	2.852	0.00434454	0.0881285	Rdh9
ENSMUSG00000000708	0.509222	0.178581	2.85149	0.00435154	0.0881689	Kat2b
ENSMUSG00000075880	-4.35584	1.52797	-2.85073	0.00436188	0.0882766	n-R5s123
ENSMUSG00000081818	-2.94985	1.0353	-2.84926	0.00438211	0.0885841	Gm12652
ENSMUSG00000010803	-0.539198	0.189291	-2.84851	0.00439248	0.0886917	Gabra1
ENSMUSG00000054196	-1.08455	0.380905	-2.84729	0.00440927	0.0889287	Cthrc1
ENSMUSG00000029049	0.392793	0.137987	2.84658	0.00441912	0.0890252	Morn1
ENSMUSG00000040446	-0.345146	0.121284	-2.84576	0.00443059	0.0891542	Rprd1a
ENSMUSG00000026112	-0.370843	0.130492	-2.84188	0.00448484	0.0901427	6330578E17Rik
ENSMUSG00000027384	-0.263943	0.0929175	-2.84062	0.00450265	0.0901915	2310003L22Rik
ENSMUSG00000040877	0.425283	0.1497	2.84091	0.0044985	0.0901915	Wdr25
ENSMUSG00000090384	0.963746	0.339223	2.84104	0.00449667	0.0901915	Gm17492
ENSMUSG00000039860	0.376078	0.132483	2.8387	0.00452981	0.0906319	Srrm3
ENSMUSG00000053580	-0.395373	0.139298	-2.83834	0.00453495	0.0906319	Tanc2
ENSMUSG00000052248	-0.890762	0.314277	-2.83432	0.00459228	0.0916648	Gm13476
ENSMUSG00000075868	-4.15893	1.46752	-2.83399	0.00459705	0.0916648	n-R5s107
ENSMUSG00000032625	0.765588	0.270365	2.83169	0.00463034	0.0921344	Thsd7a
ENSMUSG00000039539	-0.803588	0.283789	-2.83163	0.00463108	0.0921344	Sgcz
ENSMUSG00000038515	0.767875	0.271272	2.83065	0.00464533	0.0922093	Grtp1
ENSMUSG00000086249	1.97911	0.699115	2.83087	0.00464214	0.0922093	Gm12724
ENSMUSG00000021598	-0.383899	0.135662	-2.82982	0.00465735	0.0922397	Med10
ENSMUSG00000031389	0.535983	0.189403	2.82986	0.00465688	0.0922397	Arhgap4
ENSMUSG00000024597	-0.36616	0.129522	-2.82701	0.00469851	0.0929502	Slc12a2
ENSMUSG00000022010	-0.139939	0.0495132	-2.82629	0.00470904	0.0930537	Tsc22d1
ENSMUSG00000022475	0.568002	0.201058	2.82506	0.00472713	0.0933065	Hdac7
ENSMUSG00000054226	0.334667	0.118578	2.82234	0.00476742	0.0939962	Tprkb
ENSMUSG00000038299	-0.462822	0.164017	-2.82179	0.00477557	0.0940515	Wdr36
ENSMUSG00000050321	-0.770754	0.27326	-2.82059	0.00479354	0.0942998	Neto1
ENSMUSG00000021765	-1.36417	0.484152	-2.81766	0.00483755	0.0948473	Fst
ENSMUSG00000033594	-0.509232	0.180699	-2.81812	0.00483054	0.0948473	Spata2l
ENSMUSG00000074892	0.930556	0.330256	2.81769	0.00483712	0.0948473	B3galt5
ENSMUSG00000041552	-0.657749	0.23347	-2.81728	0.0048433	0.0948542	Ptchd1
ENSMUSG00000003316	0.1622	0.0575831	2.8168	0.00485049	0.0948893	Glg1
ENSMUSG00000041544	0.481348	0.170946	2.81579	0.00486568	0.0949752	Ptchd2
ENSMUSG00000050830	-1.41719	0.503273	-2.81595	0.00486336	0.0949752	Vwc2
ENSMUSG00000032902	-0.579123	0.205719	-2.81511	0.00487599	0.095071	Slc16a1
ENSMUSG00000020386	-0.35174	0.124992	-2.81409	0.00489149	0.0952675	Sar1b
ENSMUSG00000044475	-0.361388	0.128506	-2.81224	0.0049198	0.095713	Ascc1
ENSMUSG00000004947	0.346238	0.123227	2.80977	0.00495769	0.0960847	Dtx2
ENSMUSG00000029311	0.563483	0.200554	2.80963	0.00495978	0.0960847	Hsd17b11
ENSMUSG00000031015	-0.797699	0.283922	-2.80957	0.00496076	0.0960847	Swap70
ENSMUSG00000064798	-5.10272	1.81553	-2.81059	0.00494512	0.0960847	n-R5s193
ENSMUSG00000085609	-1.12961	0.402262	-2.80814	0.00498286	0.0964065	1700016P03Rik
ENSMUSG00000041261	-1.2345	0.439953	-2.80599	0.00501624	0.0969457	Car8
ENSMUSG00000020075	-0.435917	0.15555	-2.80243	0.00507193	0.097903	Ddx21
ENSMUSG00000065059	-1.59835	0.570409	-2.80211	0.0050769	0.097903
ENSMUSG00000041272	-0.703824	0.251297	-2.80076	0.00509821	0.0982061	Tox
ENSMUSG00000044042	0.456483	0.163036	2.7999	0.0051119	0.0983621	Fmn1
ENSMUSG00000033863	-0.892551	0.318871	-2.7991	0.00512455	0.0984977	Klf9
ENSMUSG00000021782	0.284191	0.10155	2.79854	0.00513346	0.0985613	Dlg5
ENSMUSG00000065324	-1.67927	0.600468	-2.79659	0.00516443	0.0990478
ENSMUSG00000027750	0.758819	0.271427	2.79567	0.0051793	0.0992248	Postn
ENSMUSG00000021366	-0.515247	0.184452	-2.7934	0.00521575	0.0993949	Hivep1
ENSMUSG00000022123	1.16422	0.416713	2.79381	0.00520912	0.0993949	Scel
ENSMUSG00000031605	-0.308333	0.110381	-2.79336	0.00521644	0.0993949	Klhl2
ENSMUSG00000046999	-0.928227	0.332217	-2.79404	0.00520543	0.0993949	1110032F04Rik
ENSMUSG00000083594	0.81278	0.290957	2.79348	0.0052145	0.0993949	Gm13722
ENSMUSG00000002416	-0.500292	0.179215	-2.79157	0.00524528	0.0995241	Ndufb2
ENSMUSG00000027208	1.29669	0.464369	2.79236	0.0052325	0.0995241	Fgf7
ENSMUSG00000031210	0.628871	0.225299	2.79127	0.00525018	0.0995241	Gpr165
ENSMUSG00000032175	0.419959	0.150459	2.79119	0.00525151	0.0995241	Tyk2
ENSMUSG00000074939	0.867419	0.310682	2.79198	0.00523858	0.0995241	Chrm5
ENSMUSG00000044757	-0.275622	0.0987813	-2.79023	0.00526711	0.0996281	Gm6430
ENSMUSG00000049106	0.201371	0.0721719	2.79015	0.00526833	0.0996281	Dcaf5
ENSMUSG00000020265	-0.29954	0.107407	-2.78884	0.00528979	0.0997247	Sumo3
ENSMUSG00000035769	0.578362	0.207382	2.78887	0.00528929	0.0997247	Xylb
ENSMUSG00000047361	1.8407	0.660035	2.7888	0.00529045	0.0997247	Gm973
ENSMUSG00000041380	-0.751712	0.269683	-2.78739	0.0053135	0.100052	Htr2c
ENSMUSG00000065121	-1.43727	0.515825	-2.78635	0.00533049	0.100265
ENSMUSG00000036864	0.50793	0.182385	2.78494	0.00535381	0.100559	BC053749
ENSMUSG00000087189	-0.422887	0.151875	-2.78444	0.00536208	0.100559	D130017N08Rik
ENSMUSG00000091971	0.758281	0.272336	2.78436	0.00536328	0.100559	Hspa1a
ENSMUSG00000092400	0.921856	0.331125	2.78401	0.00536907	0.10056	Gm20469
ENSMUSG00000028261	-0.477765	0.171748	-2.78178	0.0054062	0.101011	Ndufaf4
ENSMUSG00000058260	1.12905	0.405908	2.78153	0.00541038	0.101011	Serpina9
ENSMUSG00000062070	-0.538842	0.193719	-2.78156	0.00540977	0.101011	Pgk1
ENSMUSG00000006356	-0.311477	0.112002	-2.78098	0.00541949	0.101074	Crip2
ENSMUSG00000024658	2.47988	0.891889	2.78048	0.00542792	0.101103	Gm9750
ENSMUSG00000044250	0.56383	0.202802	2.7802	0.00543256	0.101103	Fam113b
ENSMUSG00000028172	-1.55521	0.559596	-2.77917	0.00544985	0.101318	Tacr3
ENSMUSG00000022361	0.459633	0.165479	2.77759	0.00547632	0.101595	Zhx1
ENSMUSG00000025885	-0.471041	0.169583	-2.77764	0.00547546	0.101595	Myo5b
ENSMUSG00000001416	-0.247246	0.0890315	-2.77706	0.00548527	0.101647	Cct3
ENSMUSG00000045636	0.711689	0.256304	2.77674	0.00549069	0.101647	Mtus1
ENSMUSG00000062778	1.34411	0.484174	2.77609	0.00550175	0.101745	Chia
ENSMUSG00000023805	-0.609239	0.21973	-2.77267	0.00555984	0.102711	Synj2
ENSMUSG00000024044	0.245645	0.0886218	2.77183	0.00557418	0.102728	Epb4.1l3
ENSMUSG00000028906	0.394607	0.142376	2.77159	0.00557826	0.102728	Epb4.1
ENSMUSG00000051379	-0.615546	0.222036	-2.77227	0.00556663	0.102728	Flrt3
ENSMUSG00000047193	0.220109	0.0794516	2.77035	0.00559953	0.103011	Dync2h1
ENSMUSG00000074817	0.601539	0.21719	2.76964	0.00561186	0.10313	Papolb
ENSMUSG00000024014	-1.17274	0.423889	-2.76662	0.00566414	0.103983	Pim1
ENSMUSG00000078566	-0.655108	0.236832	-2.76613	0.00567256	0.104028	Bnip3
ENSMUSG00000055296	0.480925	0.173998	2.76397	0.00571023	0.10461	D730040F13Rik
ENSMUSG00000013089	-1.41711	0.513061	-2.76207	0.00574365	0.104924	Etv5
ENSMUSG00000021868	-0.325059	0.117691	-2.76198	0.00574523	0.104924	Ppif
ENSMUSG00000050394	0.299695	0.108494	2.76232	0.00573924	0.104924	Armcx6
ENSMUSG00000039037	-0.698607	0.253013	-2.76115	0.00575981	0.105033	St6galnac5
ENSMUSG00000090086	0.610149	0.220991	2.76096	0.00576317	0.105033	AI480526
ENSMUSG00000047347	-0.366602	0.132815	-2.76025	0.00577565	0.105152	Gm5806
ENSMUSG00000042804	-0.407356	0.147612	-2.75964	0.00578658	0.105242	Gpr153
ENSMUSG00000075569	0.713751	0.258745	2.75851	0.00580651	0.105495	Rsph10b2
ENSMUSG00000004980	-0.38715	0.140443	-2.75664	0.00583991	0.105703	Hnrnpa2b1
ENSMUSG00000004980	-0.38715	0.140443	-2.75664	0.00583991	0.105703	Hnrnpa2b1
ENSMUSG00000028708	0.322201	0.116851	2.75736	0.00582699	0.105703	Mknk1
ENSMUSG00000043415	-0.628104	0.227861	-2.75652	0.00584201	0.105703	Otud1
ENSMUSG00000044566	0.600243	0.217754	2.75652	0.00584195	0.105703	Cage1
ENSMUSG00000056476	0.314619	0.114233	2.75418	0.00588388	0.106351	Med12l
ENSMUSG00000021276	-0.347538	0.126245	-2.75288	0.0059074	0.106667	Cinp
ENSMUSG00000021276	-0.347538	0.126245	-2.75288	0.0059074	0.106667	Cinp
ENSMUSG00000051335	-0.629612	0.228762	-2.75225	0.00591865	0.10676	Gfod1
ENSMUSG00000021743	-0.510854	0.185665	-2.75148	0.00593262	0.106793	Fezf2
ENSMUSG00000026836	-0.337104	0.122507	-2.75172	0.00592837	0.106793	Acvr1
ENSMUSG00000032601	-0.381498	0.138725	-2.75003	0.00595903	0.107159	Prkar2a
ENSMUSG00000040136	0.306713	0.111661	2.74682	0.00601768	0.108103	Abcc8
ENSMUSG00000068747	-0.293692	0.106939	-2.74636	0.00602615	0.108145	Sort1
ENSMUSG00000035929	0.758585	0.276334	2.74517	0.0060479	0.108314	H2-Q4
ENSMUSG00000047146	0.47681	0.173684	2.74528	0.00604596	0.108314	Tet1
ENSMUSG00000076001	-3.89586	1.42	-2.74356	0.00607762	0.108736	n-R5s141
ENSMUSG00000029875	-0.463993	0.169217	-2.74201	0.00610653	0.109142	AI836003
ENSMUSG00000075820	-4.09206	1.49284	-2.74112	0.00612299	0.109214	n-R5s133
ENSMUSG00000093200	-4.31208	1.573	-2.74131	0.00611954	0.109214
ENSMUSG00000039706	-1.08108	0.394487	-2.74046	0.00613535	0.109239	Ldb2
ENSMUSG00000054966	1.8839	0.68746	2.74038	0.00613683	0.109239	Ifltd1
ENSMUSG00000039335	1.24647	0.455205	2.73826	0.00617654	0.109724	Spata16
ENSMUSG00000064589	-1.69929	0.620565	-2.73829	0.00617594	0.109724
ENSMUSG00000044216	-0.718074	0.262331	-2.73728	0.00619495	0.109939	Kcnj4
ENSMUSG00000081953	-0.274563	0.100317	-2.73695	0.00620117	0.109939	Gm12435
ENSMUSG00000051236	0.955833	0.349348	2.73604	0.00621827	0.110021	Msrb3
ENSMUSG00000065526	1.06734	0.390089	2.73614	0.00621654	0.110021	Mir337
ENSMUSG00000065147	-0.904846	0.331038	-2.73336	0.00626912	0.110809	Snora31
ENSMUSG00000041607	-0.347277	0.127113	-2.73204	0.00629426	0.111142	Mbp
ENSMUSG00000025393	-0.214307	0.0784821	-2.73065	0.00632086	0.1115	Atp5b
ENSMUSG00000006800	-0.756973	0.277353	-2.72927	0.0063474	0.111657	Sulf2
ENSMUSG00000013833	0.321313	0.117751	2.72876	0.00635723	0.111657	Med16
ENSMUSG00000015312	-1.17332	0.430104	-2.72799	0.00637213	0.111657	Gadd45b
ENSMUSG00000035021	-1.2455	0.456369	-2.72915	0.00634978	0.111657	Baz1a
ENSMUSG00000045312	-0.604598	0.221636	-2.72788	0.00637423	0.111657	Lhfpl2
ENSMUSG00000078349	0.972238	0.356356	2.72828	0.00636659	0.111657	AW011738
ENSMUSG00000085434	1.56411	0.573087	2.72928	0.00634737	0.111657	Gm11725
ENSMUSG00000005774	0.357435	0.131054	2.72739	0.0063838	0.111713	Rfx5
ENSMUSG00000093385	1.06633	0.391193	2.72584	0.00641373	0.112125	A330044P14Rik
ENSMUSG00000021061	0.477429	0.175196	2.72511	0.00642798	0.112263	Spnb1
ENSMUSG00000043168	-1.63477	0.599993	-2.72465	0.00643688	0.112307	4930426D05Rik
ENSMUSG00000003411	-0.278717	0.102343	-2.72337	0.00646191	0.112632	Rab3b
ENSMUSG00000020173	0.534978	0.196481	2.7228	0.00647321	0.112696	Cobl
ENSMUSG00000093372	-4.14473	1.52238	-2.72253	0.00647842	0.112696
ENSMUSG00000004233	-0.417771	0.15352	-2.72128	0.00650287	0.11301	Wars2
ENSMUSG00000019820	-0.775518	0.28511	-2.72007	0.00652682	0.113314	Utrn
ENSMUSG00000035919	0.310133	0.114031	2.71973	0.00653357	0.113319	Bbs9
ENSMUSG00000031446	0.48041	0.176732	2.71829	0.006562	0.1137	Cul4a
ENSMUSG00000024301	0.592458	0.217988	2.71784	0.00657097	0.113744	Kifc5b
ENSMUSG00000029211	-0.775303	0.285585	-2.71479	0.00663178	0.114683	Gabra4
ENSMUSG00000075986	-1.52818	0.563084	-2.71395	0.00664867	0.114863
ENSMUSG00000026187	0.273465	0.100809	2.71271	0.00667352	0.115179	Xrcc5
ENSMUSG00000054453	-1.51109	0.557135	-2.71226	0.00668268	0.115224	Sytl5
ENSMUSG00000029167	-0.539578	0.198972	-2.71183	0.00669123	0.115258	Ppargc1a
ENSMUSG00000044433	0.231211	0.0854383	2.70618	0.00680626	0.117125	Camsap3
ENSMUSG00000022836	-1.19926	0.443431	-2.70451	0.00684046	0.117484	Mylk
ENSMUSG00000025202	0.632187	0.233734	2.70473	0.00683599	0.117484	Scd3
ENSMUSG00000058979	0.392649	0.145228	2.70367	0.00685787	0.117668	Cecr5
ENSMUSG00000026867	0.179139	0.0662754	2.70294	0.00687283	0.117809	Gapvd1
ENSMUSG00000020873	-0.366667	0.135709	-2.70186	0.00689529	0.117899	Slc35b1
ENSMUSG00000040033	0.400309	0.148186	2.7014	0.00690488	0.117899	Stat2
ENSMUSG00000075703	-0.279948	0.103618	-2.70172	0.0068982	0.117899	Ept1
ENSMUSG00000089871	1.31007	0.48487	2.70191	0.0068943	0.117899	Speer7-ps1
ENSMUSG00000027344	0.544335	0.20155	2.70075	0.00691839	0.117978	Fsip1
ENSMUSG00000044792	-0.288197	0.106719	-2.70053	0.00692294	0.117978	Isca1
ENSMUSG00000040452	-0.599081	0.221932	-2.69939	0.00694674	0.118269	Cdh12
ENSMUSG00000029003	0.577756	0.214098	2.69856	0.00696397	0.118448	Mad2l2
ENSMUSG00000039308	0.448712	0.166307	2.6981	0.00697358	0.118497	Ndst2
ENSMUSG00000045441	0.622991	0.230934	2.6977	0.00698204	0.118526	Gprin3
ENSMUSG00000039168	0.696837	0.258385	2.69689	0.00699904	0.1187	Dap
ENSMUSG00000026234	-0.297588	0.110397	-2.69562	0.00702581	0.119039	Ncl
ENSMUSG00000042626	0.566183	0.210127	2.69448	0.00704996	0.119334	Shc1
ENSMUSG00000055202	0.639012	0.237241	2.69352	0.00707022	0.119561	Zfp811
ENSMUSG00000053411	0.569193	0.211365	2.69294	0.0070826	0.119656	Cbx7
ENSMUSG00000021820	0.223709	0.0830842	2.69255	0.00709072	0.119678	Camk2g
ENSMUSG00000003534	0.303223	0.112693	2.69071	0.00713012	0.120112	Ddr1
ENSMUSG00000075720	-3.88854	1.44508	-2.69087	0.00712652	0.120112	n-R5s143
ENSMUSG00000047115	0.660157	0.24543	2.68979	0.00714962	0.120326	D330028D13Rik
ENSMUSG00000064181	-0.275061	0.102349	-2.68747	0.00719949	0.121049	Rab3ip
ENSMUSG00000006127	0.300658	0.111919	2.68639	0.00722288	0.121235	Inpp5k
ENSMUSG00000031838	0.376779	0.140259	2.68632	0.00722436	0.121235	Ifi30
ENSMUSG00000020085	0.721141	0.268586	2.68495	0.007254	0.12142	Aifm2
ENSMUSG00000028194	-0.368198	0.137117	-2.68529	0.00724663	0.12142	Ddah1
ENSMUSG00000037211	-1.06543	0.396828	-2.68486	0.00725609	0.12142	Spry1
ENSMUSG00000085635	1.38202	0.514979	2.68365	0.00728241	0.121745	Gm14565
ENSMUSG00000035967	0.687908	0.256432	2.68261	0.00730498	0.121891	Ddx26b
ENSMUSG00000063902	-0.613471	0.228674	-2.68274	0.00730227	0.121891	Gm7964
ENSMUSG00000030319	0.473787	0.176676	2.68167	0.00732547	0.122117	Cand2
ENSMUSG00000043456	-0.977593	0.364641	-2.68097	0.00734089	0.122258	Zfp536
ENSMUSG00000030662	-0.372007	0.13881	-2.67998	0.0073627	0.122505	Ipo5
ENSMUSG00000037681	1.07222	0.400443	2.67758	0.00741551	0.123267	Esyt3
ENSMUSG00000083246	0.729855	0.272704	2.67637	0.00744249	0.123599	Gm11839
ENSMUSG00000031701	-0.288141	0.10769	-2.67565	0.00745845	0.123714	Dnaja2
ENSMUSG00000035121	1.2486	0.466691	2.67542	0.00746347	0.123714	Neil2
ENSMUSG00000040037	-0.665058	0.248742	-2.67368	0.00750231	0.124123	Negr1
ENSMUSG00000049580	-0.589417	0.220446	-2.67375	0.00750083	0.124123	Tsku
ENSMUSG00000059495	0.218088	0.0815905	2.67296	0.00751847	0.124274	Arhgef12
ENSMUSG00000065477	1.2249	0.458424	2.67199	0.0075404	0.124519	Mir411
ENSMUSG00000038347	0.489769	0.183323	2.67161	0.00754878	0.124541	Tcte2
ENSMUSG00000038347	0.489769	0.183323	2.67161	0.00754878	0.124541	2700054A10Rik
ENSMUSG00000049892	-1.94259	0.727219	-2.67126	0.0075568	0.124556	Rasd1
ENSMUSG00000070157	-1.53009	0.57287	-2.67093	0.00756419	0.124561
ENSMUSG00000039963	0.643913	0.241277	2.66878	0.00761283	0.125245	Ccdc40
ENSMUSG00000086775	1.84239	0.690438	2.66843	0.00762062	0.125256	5730588L14Rik
ENSMUSG00000001700	0.881988	0.33058	2.668	0.00763034	0.125299	Gramd3
ENSMUSG00000040133	0.343169	0.128655	2.66736	0.00764493	0.125421	Gpr176
ENSMUSG00000070601	1.14981	0.431185	2.66662	0.00766172	0.125579	Vmn2r84
ENSMUSG00000018965	-0.282366	0.105991	-2.66405	0.00772064	0.126427	Ywhah
ENSMUSG00000027381	-1.03804	0.390009	-2.66158	0.00777749	0.12724	Bcl2l11
ENSMUSG00000020546	0.50037	0.188064	2.66063	0.00779938	0.127243	Stxbp4
ENSMUSG00000028082	-0.534987	0.201028	-2.66126	0.00778496	0.127243	Sh3d19
ENSMUSG00000078441	-0.352138	0.132346	-2.66074	0.00779683	0.127243	Scamp4
ENSMUSG00000030047	1.77119	0.665865	2.65999	0.00781429	0.127368	Arhgap25
ENSMUSG00000024134	1.04658	0.393727	2.65815	0.00785713	0.127948	Six2
ENSMUSG00000083167	2.19761	0.827209	2.65665	0.00789207	0.128398	Gm11287
ENSMUSG00000039852	0.317574	0.119599	2.65532	0.00792343	0.128789	Rere
ENSMUSG00000040274	-1.21481	0.458071	-2.65201	0.00800135	0.129815	Cdk6
ENSMUSG00000078808	0.981182	0.369967	2.65208	0.00799972	0.129815	Vmn1r58
ENSMUSG00000030539	0.319732	0.120594	2.65131	0.00801799	0.129846	Sema4b
ENSMUSG00000036552	0.304097	0.114684	2.6516	0.0080112	0.129846	2210404J11Rik
ENSMUSG00000020963	-0.755321	0.285047	-2.64982	0.00805358	0.130302	Tshr
ENSMUSG00000035469	0.359914	0.135906	2.64824	0.00809109	0.130789	Rcbtb1
ENSMUSG00000021557	-0.250828	0.094769	-2.64673	0.00812736	0.130975	Agtpbp1
ENSMUSG00000027187	0.502063	0.189658	2.6472	0.00811602	0.130975	Cat
ENSMUSG00000050822	-0.308289	0.116465	-2.64706	0.00811958	0.130975	Slc29a4
ENSMUSG00000054277	0.269245	0.101735	2.64652	0.0081324	0.130975	Arfgap3
ENSMUSG00000039849	0.410343	0.155218	2.64366	0.0082016	0.131899	Pcif1
ENSMUSG00000064608	-1.50406	0.568959	-2.64352	0.00820478	0.131899
ENSMUSG00000026273	0.337205	0.127595	2.64278	0.00822279	0.132043	Mterfd2
ENSMUSG00000052512	0.279534	0.105795	2.64223	0.00823624	0.132043	Nav2
ENSMUSG00000058317	-0.430962	0.163097	-2.64236	0.00823294	0.132043	Ube2e2
ENSMUSG00000063320	0.630921	0.238951	2.64038	0.00828143	0.132646	1190007I07Rik
ENSMUSG00000074783	1.46303	0.554216	2.63982	0.00829501	0.132743	AU019990
ENSMUSG00000002233	-0.58232	0.220627	-2.63939	0.00830548	0.132789	Rhoc
ENSMUSG00000079487	0.335716	0.127249	2.63825	0.00833343	0.133115	Med12
ENSMUSG00000023826	0.518642	0.196659	2.63727	0.0083577	0.133261	Park2
ENSMUSG00000024063	-0.877264	0.332621	-2.63743	0.00835372	0.133261	Lbh
ENSMUSG00000060212	0.299686	0.113684	2.63613	0.00838587	0.133589	Pcnxl2
ENSMUSG00000026819	-0.416955	0.158243	-2.6349	0.00841619	0.13383	Slc25a25
ENSMUSG00000047221	-0.476598	0.180858	-2.6352	0.00840882	0.13383	Fam185a
ENSMUSG00000022246	-0.394372	0.149708	-2.63427	0.00843189	0.133958	Rai14
ENSMUSG00000056698	0.35343	0.134215	2.63331	0.00845565	0.134093	Elmod3
ENSMUSG00000074497	0.644625	0.244785	2.63344	0.00845258	0.134093	A430078G23Rik
ENSMUSG00000041757	0.314016	0.119345	2.63116	0.00850943	0.134582	Plekha6
ENSMUSG00000075740	-4.93263	1.87465	-2.63123	0.00850771	0.134582	n-R5s102
ENSMUSG00000075752	-0.770146	0.292664	-2.6315	0.00850089	0.134582
ENSMUSG00000071691	0.405339	0.154083	2.63065	0.00852228	0.134664	Gm960
ENSMUSG00000036712	0.37009	0.140733	2.62973	0.00854515	0.134905	Cyld
ENSMUSG00000024427	-1.06203	0.403902	-2.62942	0.00855302	0.134908	Spry4
ENSMUSG00000029700	0.690496	0.262733	2.62813	0.00858563	0.135301	Slc13a1
ENSMUSG00000057387	1.28055	0.487312	2.62779	0.00859422	0.135315	4922502B01Rik
ENSMUSG00000052298	-0.313463	0.11932	-2.62708	0.00861204	0.135353	Cdc42se2
ENSMUSG00000052298	-0.313463	0.11932	-2.62708	0.00861204	0.135353	Cdc42se2
ENSMUSG00000075731	-3.7988	1.44598	-2.62715	0.00861025	0.135353	n-R5s142
ENSMUSG00000055373	-0.687093	0.261585	-2.62665	0.00862294	0.135403	Fut9
ENSMUSG00000038178	0.510938	0.194563	2.62609	0.00863722	0.135507	Slc43a2
ENSMUSG00000014956	-0.366469	0.13961	-2.62494	0.00866638	0.135642	Ppp1cb
ENSMUSG00000015659	0.323135	0.123107	2.62484	0.00866901	0.135642	Serac1
ENSMUSG00000048445	0.350057	0.133347	2.62515	0.00866097	0.135642	Ccdc57
ENSMUSG00000040414	0.284928	0.108589	2.62391	0.00869279	0.135893	Slc25a28
ENSMUSG00000020907	0.88956	0.339186	2.62263	0.00872544	0.136283	Rcvrn
ENSMUSG00000091299	-0.409396	0.15612	-2.62232	0.00873325	0.136284	Snhg7
ENSMUSG00000013353	1.68991	0.644816	2.62076	0.0087734	0.136789	4931406B18Rik
ENSMUSG00000030770	0.38562	0.147211	2.6195	0.00880582	0.13712	Parva
ENSMUSG00000077394	0.843324	0.321962	2.61933	0.00881024	0.13712
ENSMUSG00000044033	0.645902	0.246687	2.61831	0.00883677	0.137411	Ccdc141
ENSMUSG00000001930	0.799628	0.305551	2.617	0.00887055	0.137419	Vwf
ENSMUSG00000027355	0.991828	0.378997	2.61698	0.00887108	0.137419	Tmco5
ENSMUSG00000037474	-0.616461	0.235511	-2.61755	0.00885647	0.137419	Dtl
ENSMUSG00000047022	0.700985	0.267838	2.6172	0.00886548	0.137419	Mipol1
ENSMUSG00000089645	1.54124	0.588983	2.61678	0.00887631	0.137419	Gm5766
ENSMUSG00000000532	0.313866	0.120098	2.6134	0.00896451	0.137513	Acvr1b
ENSMUSG00000022205	-0.433116	0.165626	-2.61502	0.00892231	0.137513	Sub1
ENSMUSG00000029625	0.225346	0.0861857	2.61466	0.00893165	0.137513	Cpsf4
ENSMUSG00000034156	0.466555	0.178391	2.61535	0.00891373	0.137513	Bzrap1
ENSMUSG00000035242	-0.338583	0.129447	-2.61562	0.00890668	0.137513	Oaz1
ENSMUSG00000036617	-0.493754	0.188913	-2.61366	0.00895771	0.137513	Etl4
ENSMUSG00000037791	0.246726	0.0943806	2.61416	0.00894476	0.137513	Phf12
ENSMUSG00000038884	0.337384	0.129101	2.61333	0.00896648	0.137513	A230050P20Rik
ENSMUSG00000038975	-0.458396	0.175276	-2.61529	0.00891515	0.137513	Rabggtb
ENSMUSG00000074674	0.49261	0.188504	2.61326	0.00896838	0.137513	Gm10742
ENSMUSG00000090348	1.4658	0.560517	2.61508	0.00892066	0.137513	Gm17236
ENSMUSG00000046782	-0.858667	0.32879	-2.61159	0.00901211	0.138063	4921506M07Rik
ENSMUSG00000046782	-0.858667	0.32879	-2.61159	0.00901211	0.138063	Ttc6
ENSMUSG00000046782	-0.858667	0.32879	-2.61159	0.00901211	0.138063	Ttc6
ENSMUSG00000046782	-0.858667	0.32879	-2.61159	0.00901211	0.138063	4921506M07Rik
ENSMUSG00000057133	0.343245	0.131545	2.60934	0.00907181	0.138856	Chd6
ENSMUSG00000022404	-0.293035	0.112316	-2.60903	0.00907994	0.13886	Slc25a17
ENSMUSG00000043866	-0.351588	0.134808	-2.60806	0.00910563	0.139132	Taf10
ENSMUSG00000012126	0.457564	0.175487	2.60739	0.00912352	0.139284	Ubxn11
ENSMUSG00000033595	0.864474	0.331777	2.60559	0.00917163	0.139805	Lgi3
ENSMUSG00000052331	-0.277757	0.106603	-2.60552	0.00917351	0.139805	Ankrd44
ENSMUSG00000033526	0.307356	0.11814	2.60163	0.00927815	0.141277	Ppip5k1
ENSMUSG00000021340	0.562826	0.216421	2.6006	0.00930605	0.141579	Gpld1
ENSMUSG00000040820	0.435739	0.167622	2.59954	0.00933497	0.141896	Hlcs
ENSMUSG00000034765	-1.35189	0.520724	-2.59617	0.00942707	0.143173	Dusp5
ENSMUSG00000005534	0.220363	0.0849154	2.59509	0.00945666	0.143498	Insr
ENSMUSG00000037410	0.325981	0.125665	2.59406	0.00948513	0.143806	Tbc1d2b
ENSMUSG00000027175	0.266997	0.102956	2.59332	0.00950556	0.143992	Tcp11l1
ENSMUSG00000026222	1.30207	0.502377	2.59181	0.00954718	0.144456	Sp100
ENSMUSG00000050840	-0.611806	0.236071	-2.59162	0.00955265	0.144456	Cdh20
ENSMUSG00000020275	-1.03984	0.401538	-2.58963	0.00960787	0.145166	Rel
ENSMUSG00000038712	0.313945	0.121307	2.58803	0.0096527	0.145719	Fam63a
ENSMUSG00000006219	0.922581	0.356712	2.58635	0.00969988	0.145805	Fblim1
ENSMUSG00000037172	0.525868	0.203313	2.5865	0.00969575	0.145805	E330009J07Rik
ENSMUSG00000081257	1.76366	0.681779	2.58686	0.0096856	0.145805	Gm13607
ENSMUSG00000085032	1.15832	0.447765	2.58689	0.00968475	0.145805	Gm11217
ENSMUSG00000091447	1.18721	0.458995	2.58654	0.00969461	0.145805	Gm17386
ENSMUSG00000033676	-0.537102	0.207772	-2.58505	0.00973641	0.146168	Gabrb3
ENSMUSG00000060989	-0.322629	0.124813	-2.5849	0.00974068	0.146168	Gm11847
ENSMUSG00000018446	-0.262205	0.101524	-2.5827	0.00980319	0.146856	C1qbp
ENSMUSG00000026470	0.274228	0.106174	2.58281	0.00979983	0.146856	Stx6
ENSMUSG00000053119	-0.276123	0.107018	-2.58016	0.0098754	0.147812	Chmp3
ENSMUSG00000079724	0.461178	0.178785	2.57951	0.00989398	0.147964	Rnaset2b
ENSMUSG00000079724	0.461178	0.178785	2.57951	0.00989398	0.147964	Rnaset2b
ENSMUSG00000009216	-0.351093	0.13617	-2.57834	0.00992763	0.148215	Fam163b
ENSMUSG00000093367	-5.28325	2.04906	-2.57838	0.00992642	0.148215
ENSMUSG00000056427	-0.522654	0.202796	-2.57724	0.00995921	0.14856	Slit3
ENSMUSG00000036086	-0.391724	0.152038	-2.57649	0.009981	0.148633	Zranb3
ENSMUSG00000059005	-0.278855	0.108226	-2.57659	0.00997795	0.148633	Hnrnpa3
ENSMUSG00000059005	-0.278855	0.108226	-2.57659	0.00997795	0.148633	Hnrnpa3
ENSMUSG00000017830	0.720678	0.279895	2.57481	0.0100294	0.149051	Dhx58
ENSMUSG00000028780	-0.648948	0.252054	-2.57464	0.0100345	0.149051	Sema3c
ENSMUSG00000052738	-0.25995	0.100946	-2.57513	0.0100203	0.149051	Suclg1
ENSMUSG00000037031	0.678652	0.263688	2.57369	0.010062	0.149334	Tspan15
ENSMUSG00000031134	-0.402695	0.156532	-2.57261	0.0100936	0.149676	Rbmx
ENSMUSG00000026525	-0.735595	0.286053	-2.57154	0.0101248	0.149887	Opn3
ENSMUSG00000033209	0.50753	0.197351	2.57171	0.0101197	0.149887	Ttc28
ENSMUSG00000050315	0.657429	0.255822	2.56987	0.0101737	0.150484	Synpo2
ENSMUSG00000031137	-0.358015	0.139338	-2.5694	0.0101874	0.15056	Fgf13
ENSMUSG00000043940	0.250471	0.097536	2.56798	0.0102292	0.151051	Wdfy3
ENSMUSG00000031959	0.242861	0.0946251	2.56656	0.0102711	0.151542	Wdr59
ENSMUSG00000019986	0.300323	0.117074	2.56525	0.0103102	0.151864	Ahi1
ENSMUSG00000021149	-0.259556	0.101177	-2.56536	0.010307	0.151864	Gtpbp4
ENSMUSG00000073388	0.583739	0.227609	2.56466	0.0103278	0.151996	A330017A19Rik
ENSMUSG00000048600	0.500735	0.195456	2.56188	0.0104107	0.153088	Gm5763
ENSMUSG00000056014	0.691343	0.270104	2.55955	0.0104808	0.153862	A430033K04Rik
ENSMUSG00000086308	0.91442	0.357249	2.55962	0.0104787	0.153862	G630016G05Rik
ENSMUSG00000048794	0.646513	0.252684	2.55858	0.0105101	0.154162	Ccdc37
ENSMUSG00000043391	-0.410976	0.160672	-2.55785	0.010532	0.154323	2510009E07Rik
ENSMUSG00000075859	-3.7891	1.48148	-2.55764	0.0105386	0.154323	n-R5s146
ENSMUSG00000033430	0.324756	0.127249	2.55213	0.0107067	0.156655	Terf2ip
ENSMUSG00000059602	0.419132	0.164264	2.55157	0.0107239	0.156775	Syn3
ENSMUSG00000047881	-0.541085	0.212177	-2.55016	0.0107675	0.157282	Rell1
ENSMUSG00000048277	0.621987	0.244167	2.54739	0.0108533	0.158273	Syngr2
ENSMUSG00000093655	1.50364	0.590208	2.54764	0.0108453	0.158273
ENSMUSG00000029790	-0.54603	0.214382	-2.54699	0.0108657	0.158322	Tsga14
ENSMUSG00000065642	1.3862	0.544547	2.5456	0.0109091	0.158823	Snora69
ENSMUSG00000028402	0.25557	0.100434	2.54467	0.0109381	0.159023	Mpdz
ENSMUSG00000030757	0.480969	0.189017	2.54458	0.0109409	0.159023	Zkscan2
ENSMUSG00000065156	-1.43197	0.562847	-2.54415	0.0109545	0.159089
ENSMUSG00000047368	-0.305481	0.120143	-2.54264	0.0110017	0.159643	Fam108b
ENSMUSG00000025577	0.635569	0.250053	2.54174	0.0110303	0.159794	Cbx2
ENSMUSG00000029817	-0.354149	0.139328	-2.54184	0.0110271	0.159794	Tra2a
ENSMUSG00000022376	-0.478565	0.188432	-2.53973	0.0110938	0.160552	Adcy8
ENSMUSG00000036251	1.40567	0.553521	2.53951	0.0111009	0.160552	Trpm8
ENSMUSG00000022338	-0.37432	0.147492	-2.5379	0.0111519	0.161157	Eny2
ENSMUSG00000041995	0.559942	0.220707	2.53704	0.0111794	0.16129	Zbed3
ENSMUSG00000044021	1.47997	0.583319	2.53715	0.0111758	0.16129	Muc19
ENSMUSG00000020334	0.561364	0.221338	2.53623	0.0112054	0.1614	Slc22a4
ENSMUSG00000046463	0.792547	0.312484	2.53628	0.0112037	0.1614	5930403N24Rik
ENSMUSG00000027296	-0.456233	0.179932	-2.53558	0.0112261	0.161565	Itpka
ENSMUSG00000023967	-0.303106	0.119577	-2.53481	0.0112507	0.161656	Mrps18a
ENSMUSG00000040653	-0.306172	0.120777	-2.53502	0.0112441	0.161656	Ppp1r14c
ENSMUSG00000041696	0.693529	0.273733	2.53359	0.01129	0.161956	Rasl12
ENSMUSG00000042364	-0.471167	0.185962	-2.53367	0.0112875	0.161956	Snx18
ENSMUSG00000026095	-0.323843	0.127905	-2.53191	0.0113444	0.162404	Asnsd1
ENSMUSG00000037239	-1.01323	0.400215	-2.53171	0.0113508	0.162404	Spred3
ENSMUSG00000038085	0.539462	0.213065	2.53192	0.011344	0.162404	4921517L17Rik
ENSMUSG00000091432	0.91584	0.36178	2.53148	0.0113582	0.162404	Gm17338
ENSMUSG00000063808	0.23576	0.093297	2.52698	0.0115048	0.164367	Gpatch1
ENSMUSG00000071456	-0.456472	0.180663	-2.52666	0.0115155	0.164385	1110002L01Rik
ENSMUSG00000048332	-0.69739	0.276058	-2.52625	0.0115289	0.164443	Lhfp
ENSMUSG00000033166	-0.365863	0.144888	-2.52515	0.0115649	0.164823	Dis3
ENSMUSG00000019461	-0.344121	0.136339	-2.52401	0.0116024	0.165224	Plscr3
ENSMUSG00000025159	0.300813	0.119305	2.52138	0.0116896	0.165928	Mms19
ENSMUSG00000033096	-0.260323	0.103224	-2.52192	0.0116716	0.165928	2310001A20Rik
ENSMUSG00000033530	-0.324121	0.128512	-2.52211	0.0116653	0.165928	Ttc7b
ENSMUSG00000073469	0.464418	0.184173	2.52163	0.0116811	0.165928	Rnaset2a
ENSMUSG00000073469	0.464418	0.184173	2.52163	0.0116811	0.165928	Rnaset2a
ENSMUSG00000031662	1.32247	0.524668	2.52058	0.0117162	0.166172	Snx20
ENSMUSG00000028214	-1.7522	0.695508	-2.5193	0.0117587	0.166613	Gem
ENSMUSG00000038188	1.75443	0.696458	2.51908	0.0117663	0.166613	Scarf1
ENSMUSG00000025195	0.433699	0.172218	2.51832	0.0117916	0.166798	Dnmbp
ENSMUSG00000038152	-0.832665	0.330744	-2.51755	0.0118173	0.166798	5033430I15Rik
ENSMUSG00000086368	0.749777	0.297804	2.51769	0.0118128	0.166798	Gm13830
ENSMUSG00000090877	0.773948	0.307358	2.51807	0.0118001	0.166798	Hspa1b
ENSMUSG00000045275	0.871428	0.346294	2.51644	0.0118548	0.167059	Lca5l
ENSMUSG00000059824	0.891777	0.35437	2.51651	0.0118522	0.167059	Dbp
ENSMUSG00000010505	0.704353	0.280012	2.51544	0.0118885	0.167401	Myt1
ENSMUSG00000026546	1.05394	0.419183	2.51427	0.0119279	0.167821	Ccdc19
ENSMUSG00000036611	-0.969367	0.385659	-2.51353	0.0119528	0.168037	Eepd1
ENSMUSG00000023307	-0.191477	0.0762049	-2.51266	0.0119825	0.16832	2005-03-01
ENSMUSG00000046668	-0.680323	0.271121	-2.50929	0.0120972	0.169796	Cxxc5
ENSMUSG00000038677	0.545743	0.217557	2.5085	0.0121244	0.170041	Scube3
ENSMUSG00000090673	0.424383	0.169211	2.50801	0.0121412	0.170141	Gm340
ENSMUSG00000039886	-0.311349	0.124305	-2.50472	0.0122547	0.171565	Tmem120a
ENSMUSG00000074292	1.35477	0.540933	2.5045	0.0122623	0.171565	Gm10660
ENSMUSG00000024299	0.507597	0.203034	2.50006	0.0124173	0.173186	Adamts10
ENSMUSG00000032077	0.314692	0.125902	2.49949	0.0124373	0.173186	Bud13
ENSMUSG00000041324	-1.03616	0.414411	-2.50032	0.012408	0.173186	Inhba
ENSMUSG00000046688	1.10983	0.443974	2.49975	0.012428	0.173186	Tifa
ENSMUSG00000050296	1.1532	0.461369	2.49952	0.0124361	0.173186	Abca12
ENSMUSG00000075838	-4.68373	1.8732	-2.50039	0.0124057	0.173186	n-R5s106
ENSMUSG00000017718	0.728704	0.29162	2.49881	0.0124611	0.173381	Afmid
ENSMUSG00000045094	0.677375	0.271156	2.4981	0.0124861	0.173591	Arhgef37
ENSMUSG00000085661	0.940981	0.376928	2.49645	0.0125443	0.174263	1700034P13Rik
ENSMUSG00000025869	-0.294688	0.118082	-2.49562	0.0125737	0.174534	Nop16
ENSMUSG00000031458	0.335346	0.134413	2.4949	0.0125993	0.174751	2410022L05Rik
ENSMUSG00000022237	-1.66968	0.670178	-2.4914	0.0127242	0.176344	Ankrd33b
ENSMUSG00000002308	0.391536	0.15721	2.49054	0.0127551	0.176633	Cd320
ENSMUSG00000004961	-0.181445	0.0729082	-2.48868	0.0128217	0.177415	Syt5
ENSMUSG00000015806	-0.438913	0.176459	-2.48734	0.0128703	0.177809	Qdpr
ENSMUSG00000037035	-0.617147	0.2481	-2.4875	0.0128646	0.177809	Inhbb
ENSMUSG00000006276	0.303683	0.122145	2.48625	0.0129099	0.178004	Eps15l1
ENSMUSG00000070327	0.544394	0.218974	2.48611	0.0129148	0.178004	Rnf213
ENSMUSG00000072964	-0.244223	0.0982297	-2.48625	0.0129099	0.178004	Bhlhb9
ENSMUSG00000011832	0.266057	0.107155	2.48292	0.013031	0.179298	Evi5l
ENSMUSG00000011832	0.266057	0.107155	2.48292	0.013031	0.179298	Evi5l
ENSMUSG00000019230	0.730312	0.294161	2.4827	0.0130393	0.179298	Lhx9
ENSMUSG00000054408	-0.426935	0.171936	-2.48311	0.0130242	0.179298	Spcs3
ENSMUSG00000028845	1.10362	0.44467	2.48188	0.0130692	0.179569	Tekt2
ENSMUSG00000020790	0.158611	0.0639653	2.47964	0.0131514	0.180276	Ankfy1
ENSMUSG00000039782	-0.365233	0.147288	-2.47971	0.0131489	0.180276	Cpeb2
ENSMUSG00000047793	0.773766	0.311993	2.48007	0.0131356	0.180276	Sned1
ENSMUSG00000062372	0.683244	0.275667	2.47851	0.0131932	0.180708	Otof
ENSMUSG00000022797	-0.673393	0.271911	-2.47652	0.0132671	0.18105	Tfrc
ENSMUSG00000028383	0.451821	0.18239	2.47723	0.0132406	0.18105	Hsdl2
ENSMUSG00000028945	-0.337457	0.13626	-2.47657	0.0132653	0.18105	Rheb
ENSMUSG00000029169	-0.243852	0.0984886	-2.47595	0.0132884	0.18105	Dhx15
ENSMUSG00000040652	-0.392122	0.158284	-2.47733	0.0132368	0.18105	Oaz2
ENSMUSG00000050875	0.401544	0.162172	2.47604	0.0132849	0.18105	A730017C20Rik
ENSMUSG00000078599	1.4117	0.570178	2.4759	0.0132902	0.18105	Skint8
ENSMUSG00000063531	-0.966263	0.39037	-2.47525	0.0133143	0.181237	Sema3e
ENSMUSG00000037990	-0.386371	0.156112	-2.47496	0.0133251	0.181244	Sh3rf3
ENSMUSG00000067713	-0.449991	0.181873	-2.47421	0.0133531	0.181485	Prkag1
ENSMUSG00000022829	-0.58861	0.237946	-2.47371	0.0133718	0.181599	Stxbp5l
ENSMUSG00000007279	0.836899	0.338396	2.47314	0.0133933	0.18164	Scube2
ENSMUSG00000056972	-0.600879	0.242968	-2.47308	0.0133956	0.18164	Magel2
ENSMUSG00000007817	-0.380239	0.153894	-2.47078	0.013482	0.182251	Zmiz1
ENSMUSG00000039221	-0.91892	0.371914	-2.47078	0.0134817	0.182251	Rpl22l1
ENSMUSG00000054708	0.606878	0.245606	2.47094	0.0134758	0.182251	Ankrd24
ENSMUSG00000078185	-0.445415	0.180234	-2.47131	0.0134618	0.182251	Chml
ENSMUSG00000004267	-0.393112	0.159141	-2.47022	0.0135032	0.182362	Eno2
ENSMUSG00000046546	-1.16002	0.469642	-2.47001	0.013511	0.182362	Fam43a
ENSMUSG00000022763	0.867792	0.351429	2.46933	0.0135368	0.182401	Aifm3
ENSMUSG00000029442	0.61119	0.247525	2.46921	0.0135413	0.182401	Wdr66
ENSMUSG00000068015	0.305727	0.123821	2.46911	0.013545	0.182401	Lrch1
ENSMUSG00000024854	-0.441226	0.178725	-2.46874	0.0135591	0.182451	Pold4
ENSMUSG00000007617	-0.775924	0.314575	-2.46658	0.0136412	0.183276	Homer1
ENSMUSG00000075911	-3.59531	1.45757	-2.46665	0.0136383	0.183276	n-R5s144
ENSMUSG00000029878	-0.486652	0.197379	-2.46556	0.0136797	0.183653	Dbpht2
ENSMUSG00000078490	1.09086	0.442649	2.46438	0.013725	0.18412	C030017K20Rik
ENSMUSG00000026853	0.281071	0.114075	2.4639	0.0137433	0.184131	Crat
ENSMUSG00000031450	0.666285	0.270453	2.46359	0.0137555	0.184131	Grk1
ENSMUSG00000041264	-0.239057	0.097038	-2.46354	0.0137572	0.184131	Uspl1
ENSMUSG00000024913	0.571629	0.232088	2.46298	0.0137787	0.184278	Lrp5
ENSMUSG00000029703	0.268098	0.108919	2.46146	0.0138374	0.184549	Lrwd1
ENSMUSG00000032340	-0.348873	0.141722	-2.46166	0.0138295	0.184549	Neo1
ENSMUSG00000037235	0.443999	0.180343	2.46197	0.0138176	0.184549	Mxd4
ENSMUSG00000052155	-0.439463	0.178544	-2.46137	0.0138409	0.184549	Acvr2a
ENSMUSG00000090286	1.0269	0.417283	2.46093	0.0138577	0.184632	Gm17615
ENSMUSG00000027993	0.252268	0.102562	2.45968	0.0139063	0.184927	Trim2
ENSMUSG00000028294	-1.04026	0.423064	-2.45887	0.0139376	0.184927	1700003M02Rik
ENSMUSG00000029086	-0.74617	0.303477	-2.45873	0.0139429	0.184927	Prom1
ENSMUSG00000034653	-0.250028	0.101664	-2.45937	0.0139181	0.184927	Ythdc2
ENSMUSG00000050821	-0.650922	0.264732	-2.4588	0.0139404	0.184927	Fam131a
ENSMUSG00000086386	1.0253	0.416938	2.45913	0.0139275	0.184927	Gm12108
ENSMUSG00000003526	1.21971	0.496137	2.45841	0.0139553	0.184952	Prodh
ENSMUSG00000037148	0.341945	0.139134	2.45767	0.0139842	0.185056	Arhgap10
ENSMUSG00000045064	0.935943	0.380818	2.45772	0.0139823	0.185056	Fam164c
ENSMUSG00000026185	0.562945	0.22911	2.4571	0.0140065	0.185073	Igfbp5
ENSMUSG00000074575	-1.10929	0.451463	-2.4571	0.0140064	0.185073	Kcng1
ENSMUSG00000000275	0.763112	0.310716	2.45598	0.0140501	0.185124	Trim25
ENSMUSG00000021991	-0.458396	0.186628	-2.4562	0.0140414	0.185124	Cacna2d3
ENSMUSG00000065084	-1.64212	0.668574	-2.45615	0.0140435	0.185124
ENSMUSG00000085769	0.707027	0.287887	2.45592	0.0140525	0.185124	D230017M19Rik
ENSMUSG00000089945	1.021	0.415833	2.45531	0.0140763	0.185299	Gm20459
ENSMUSG00000023092	0.222764	0.0907472	2.45477	0.0140975	0.18544	Fhl1
ENSMUSG00000054162	-0.59829	0.24377	-2.45433	0.0141148	0.185529	Spock3
ENSMUSG00000074788	-0.818868	0.333744	-2.45358	0.0141442	0.185776	5830416P10Rik
ENSMUSG00000029108	-0.267807	0.109186	-2.45276	0.0141763	0.18592	Pcdh7
ENSMUSG00000091687	0.73382	0.299177	2.45279	0.0141752	0.18592	Gm4983
ENSMUSG00000035486	0.728613	0.297257	2.45112	0.0142413	0.186597	Plk5
ENSMUSG00000037935	-0.17553	0.0716192	-2.45088	0.0142507	0.186597	Smarce1
ENSMUSG00000047261	-0.220387	0.0899301	-2.45065	0.0142597	0.186597	Gap43
ENSMUSG00000021260	0.518319	0.211653	2.44891	0.0143289	0.187248	Hhipl1
ENSMUSG00000073470	0.957242	0.390892	2.44886	0.0143308	0.187248	Gm1604b
ENSMUSG00000020048	-0.172769	0.070581	-2.44782	0.0143725	0.187544	Hsp90b1
ENSMUSG00000067558	-0.449823	0.183769	-2.44776	0.0143748	0.187544	Rpl35a-ps5
ENSMUSG00000036880	-0.386001	0.157728	-2.44726	0.0143946	0.187663	Acaa2
ENSMUSG00000032562	0.26648	0.108905	2.4469	0.0144092	0.187698	Gnai2
ENSMUSG00000044816	0.632986	0.258714	2.44666	0.0144186	0.187698	D630023F18Rik
ENSMUSG00000079457	1.5957	0.652343	2.4461	0.0144409	0.187849	Gm7609
ENSMUSG00000040010	-0.356909	0.14593	-2.44575	0.0144551	0.187896	Slc7a5
ENSMUSG00000020368	-0.19974	0.0816831	-2.44531	0.0144729	0.187987	Canx
ENSMUSG00000080662	1.14836	0.469701	2.44487	0.0144903	0.188075	Mir1b
ENSMUSG00000022240	-0.266302	0.108945	-2.44438	0.0145103	0.188195	Ctnnd2
ENSMUSG00000022802	0.430561	0.176222	2.44329	0.0145541	0.188346	Lmln
ENSMUSG00000029430	-0.270219	0.110584	-2.44355	0.0145435	0.188346	Ran
ENSMUSG00000029430	-0.270219	0.110584	-2.44355	0.0145435	0.188346	Ran
ENSMUSG00000033377	-1.18059	0.483182	-2.44336	0.014551	0.188346	Palmd
ENSMUSG00000026224	0.677585	0.277558	2.44124	0.0146371	0.189183	4933407L21Rik
ENSMUSG00000029641	-1.12115	0.459315	-2.44092	0.0146499	0.189183	Rasl11a
ENSMUSG00000057880	0.510881	0.209301	2.44089	0.014651	0.189183	Abat
ENSMUSG00000046605	0.340348	0.139476	2.44019	0.0146796	0.189413	B3gntl1
ENSMUSG00000022863	-0.538373	0.220772	-2.43859	0.0147446	0.190112	Btg3
ENSMUSG00000000567	-0.730124	0.299563	-2.43729	0.0147976	0.190517	Sox9
ENSMUSG00000037966	-0.443128	0.181797	-2.43749	0.0147897	0.190517	Ninj1
ENSMUSG00000090944	1.3434	0.551387	2.4364	0.0148341	0.190847	Gm17513
ENSMUSG00000018634	-0.712075	0.292745	-2.43241	0.0149987	0.192708	Crhr1
ENSMUSG00000034931	0.236725	0.0973229	2.43236	0.0150007	0.192708	Dhx8
ENSMUSG00000010044	0.475807	0.195698	2.43133	0.0150434	0.192834	Zmynd10
ENSMUSG00000017210	0.194428	0.0799633	2.43147	0.0150377	0.192834	Med24
ENSMUSG00000092929	-3.77623	1.55296	-2.43163	0.0150311	0.192834
ENSMUSG00000067279	-0.94846	0.390282	-2.43019	0.0150908	0.193301	Ppp1r3c
ENSMUSG00000025854	0.266013	0.109493	2.42951	0.0151193	0.193397	Fam20c
ENSMUSG00000034066	0.462457	0.190373	2.42922	0.0151313	0.193397	Farp2
ENSMUSG00000085881	0.828213	0.340904	2.42946	0.0151214	0.193397	Gm15912
ENSMUSG00000032076	-0.461234	0.19006	-2.42678	0.0152335	0.194421	Cadm1
ENSMUSG00000048756	0.29385	0.121074	2.42703	0.015223	0.194421	Foxo3
ENSMUSG00000006675	0.286242	0.117966	2.42648	0.0152459	0.194438	P4htm
ENSMUSG00000064412	-1.25477	0.517268	-2.42576	0.0152762	0.194683
ENSMUSG00000009406	0.603847	0.248992	2.42517	0.0153011	0.194859	Elk1
ENSMUSG00000031386	-0.320089	0.132015	-2.42465	0.0153232	0.194859	Hcfc1
ENSMUSG00000035530	-0.316473	0.130519	-2.42474	0.0153195	0.194859	Eif1
ENSMUSG00000035530	-0.316473	0.130519	-2.42474	0.0153195	0.194859	Eif1
ENSMUSG00000035530	-0.316473	0.130519	-2.42474	0.0153195	0.194859	Eif1
ENSMUSG00000049969	0.401189	0.165483	2.42435	0.0153357	0.194877	Plekhf2
ENSMUSG00000026514	-0.387516	0.159894	-2.42358	0.0153682	0.195148	Cnih3
ENSMUSG00000074422	1.11833	0.461669	2.42237	0.0154196	0.19566	Gm17312
ENSMUSG00000085125	0.877226	0.362204	2.42191	0.0154391	0.195766	Gm16070
ENSMUSG00000034729	-0.216385	0.089387	-2.42076	0.0154879	0.196102	Mrps10
ENSMUSG00000060509	1.208	0.498995	2.42086	0.0154839	0.196102	Xcr1
ENSMUSG00000021936	-0.338816	0.140018	-2.4198	0.015529	0.196481	Mapk8
ENSMUSG00000000339	-0.182363	0.0753976	-2.41869	0.0155766	0.196801	Rtcd1
ENSMUSG00000031403	-0.348083	0.143903	-2.41887	0.015569	0.196801	Dkc1
ENSMUSG00000004451	0.305858	0.126551	2.41688	0.0156541	0.197353	Ralb
ENSMUSG00000043671	-0.233935	0.0967872	-2.417	0.0156491	0.197353	Dpy19l3
ENSMUSG00000072949	0.581205	0.240467	2.41698	0.0156498	0.197353	Acot1
ENSMUSG00000028753	0.792164	0.327809	2.41654	0.0156689	0.197399	Vwa5b1
ENSMUSG00000024151	0.342416	0.141727	2.41603	0.0156909	0.197534	Msh2
ENSMUSG00000020623	0.313486	0.129859	2.41404	0.0157767	0.198473	Map2k6
ENSMUSG00000020156	0.344343	0.142665	2.41365	0.0157938	0.198546	Mum1
ENSMUSG00000028717	0.562974	0.233299	2.4131	0.0158174	0.198701	Tal1
ENSMUSG00000014164	0.35636	0.147767	2.41164	0.0158811	0.199251	Klhl3
ENSMUSG00000032268	0.71284	0.295592	2.41157	0.0158839	0.199251	Tmprss5
ENSMUSG00000085607	0.817818	0.339226	2.41084	0.015916	0.199511	Gm16854
ENSMUSG00000036790	-0.527154	0.218699	-2.41041	0.0159347	0.199604	Slitrk2
ENSMUSG00000028399	-0.36863	0.152994	-2.40944	0.0159771	0.199993	Ptprd
ENSMUSG00000051397	0.880091	0.365414	2.40848	0.0160191	0.200376	Tacstd2
ENSMUSG00000031805	0.43209	0.179513	2.40702	0.0160835	0.201038	Jak3
ENSMUSG00000029075	0.81371	0.338182	2.40613	0.0161226	0.20124	Tnfrsf4
ENSMUSG00000055540	-0.503742	0.20935	-2.40621	0.0161189	0.20124	Epha6
ENSMUSG00000044645	-0.604502	0.251355	-2.40498	0.0161734	0.201732	Gm7334
ENSMUSG00000058799	-0.261176	0.108616	-2.40457	0.0161914	0.201813	Nap1l1
ENSMUSG00000002983	-0.884991	0.368149	-2.4039	0.0162213	0.202043	Relb
ENSMUSG00000008682	-0.222337	0.0925041	-2.40354	0.0162372	0.202098	Rpl10
ENSMUSG00000008682	-0.222337	0.0925041	-2.40354	0.0162372	0.202098	Rpl10
ENSMUSG00000077962	2.08439	0.867404	2.40303	0.0162601	0.202239	Mir874
ENSMUSG00000002228	-0.991615	0.41283	-2.40199	0.016306	0.202577	Ppm1j
ENSMUSG00000069312	0.455736	0.18976	2.40164	0.0163218	0.202577	Hist1h3h
ENSMUSG00000069312	0.455736	0.18976	2.40164	0.0163218	0.202577	Hist1h3h
ENSMUSG00000069312	0.455736	0.18976	2.40164	0.0163218	0.202577	Hist1h3h
ENSMUSG00000069312	0.455736	0.18976	2.40164	0.0163218	0.202577	Hist1h3h
ENSMUSG00000086839	1.14304	0.475896	2.40186	0.0163117	0.202577	Gm11973
ENSMUSG00000025420	0.482456	0.201004	2.40022	0.0163851	0.203075	Katnal2
ENSMUSG00000026489	0.666417	0.277639	2.4003	0.0163819	0.203075	Adck3
ENSMUSG00000040490	-0.314402	0.131099	-2.3982	0.0164759	0.204057	Lrfn2
ENSMUSG00000021311	0.374404	0.15615	2.39772	0.0164976	0.204182	Mtr
ENSMUSG00000017778	-0.508076	0.211964	-2.397	0.01653	0.204212	Cox7c
ENSMUSG00000017778	-0.508076	0.211964	-2.397	0.01653	0.204212	Cox7c
ENSMUSG00000021892	0.525181	0.2191	2.397	0.0165301	0.204212	Sh3bp5
ENSMUSG00000043241	0.431214	0.179905	2.39689	0.0165348	0.204212	Upf2
ENSMUSG00000025362	-0.300826	0.12553	-2.39645	0.0165547	0.204314	Rps26
ENSMUSG00000025362	-0.300826	0.12553	-2.39645	0.0165547	0.204314	Rps26
ENSMUSG00000044499	-0.448647	0.18726	-2.39585	0.0165817	0.204504	Hs3st5
ENSMUSG00000009035	-0.312593	0.130535	-2.3947	0.0166339	0.204885	Tmem184b
ENSMUSG00000037624	-0.274376	0.114591	-2.3944	0.0166475	0.204885	Kcnk2
ENSMUSG00000085832	-1.10087	0.45976	-2.39445	0.0166454	0.204885	D430036J16Rik
ENSMUSG00000046314	-0.391172	0.163423	-2.39361	0.0166833	0.205105	Stxbp6
ENSMUSG00000050967	0.63645	0.265908	2.39349	0.0166888	0.205105	Creg2
ENSMUSG00000069106	-0.389594	0.162797	-2.39312	0.0167057	0.20517	Gm8910
ENSMUSG00000022895	-0.52628	0.220049	-2.39165	0.016773	0.205647	Ets2
ENSMUSG00000030350	-0.308455	0.12898	-2.3915	0.0167796	0.205647	Prmt8
ENSMUSG00000052593	0.411905	0.172212	2.39185	0.0167635	0.205647	Adam17
ENSMUSG00000020607	-0.527491	0.220669	-2.39042	0.0168289	0.205704	Fam84a
ENSMUSG00000022174	-0.4506	0.188506	-2.39038	0.0168311	0.205704	Dad1
ENSMUSG00000036466	-0.775625	0.324443	-2.39064	0.0168191	0.205704	Megf11
ENSMUSG00000092726	-3.40708	1.42512	-2.39074	0.0168146	0.205704
ENSMUSG00000019487	-1.1729	0.490739	-2.39007	0.0168452	0.205733	Trip10
ENSMUSG00000087301	1.24709	0.52186	2.3897	0.0168619	0.205795	Gm13629
ENSMUSG00000000296	-0.617659	0.258566	-2.38879	0.0169042	0.206043	Tpd52l1
ENSMUSG00000024456	0.364054	0.152403	2.38875	0.0169056	0.206043	Diap1
ENSMUSG00000037965	0.29429	0.123285	2.38707	0.0169833	0.206798	Zc3h7a
ENSMUSG00000042642	-0.286566	0.120058	-2.3869	0.0169912	0.206798	Flad1
ENSMUSG00000031383	-2.08246	0.872717	-2.38618	0.0170243	0.207058	Dusp9
ENSMUSG00000083380	-0.529762	0.222042	-2.38586	0.0170391	0.207095	Gm3244
ENSMUSG00000021417	0.332597	0.13944	2.38523	0.0170686	0.207311	Eci2
ENSMUSG00000024420	-0.551092	0.231218	-2.38343	0.0171523	0.207698	Zfp521
ENSMUSG00000025786	-0.201794	0.0846788	-2.38306	0.0171696	0.207698	Zdhhc3
ENSMUSG00000027998	-0.209423	0.0878812	-2.38302	0.0171714	0.207698	Plrg1
ENSMUSG00000028788	-0.338496	0.142032	-2.38323	0.0171613	0.207698	Ptp4a2
ENSMUSG00000062808	0.488883	0.205108	2.38353	0.0171473	0.207698	Hist1h3d
ENSMUSG00000062808	0.488883	0.205108	2.38353	0.0171473	0.207698	Hist1h3d
ENSMUSG00000062808	0.488883	0.205108	2.38353	0.0171473	0.207698	Hist1h3d
ENSMUSG00000062808	0.488883	0.205108	2.38353	0.0171473	0.207698	Hist1h3d
ENSMUSG00000062808	0.488883	0.205108	2.38353	0.0171473	0.207698	Hist1h3d
ENSMUSG00000062808	0.488883	0.205108	2.38353	0.0171473	0.207698	Hist1h3d
ENSMUSG00000062808	0.488883	0.205108	2.38353	0.0171473	0.207698	Hist1h3d
ENSMUSG00000062808	0.488883	0.205108	2.38353	0.0171473	0.207698	Hist1h3d
ENSMUSG00000074582	0.209106	0.0877475	2.38304	0.0171704	0.207698	Arfgef2
ENSMUSG00000026355	0.497799	0.208933	2.38258	0.017192	0.207804	Mcm6
ENSMUSG00000083798	-0.320379	0.134482	-2.38232	0.0172041	0.207808	Gm14584
ENSMUSG00000039601	-0.631363	0.26512	-2.38142	0.0172461	0.208172	Rcan2
ENSMUSG00000061755	0.256237	0.107615	2.38105	0.0172633	0.208237	Bod1l
ENSMUSG00000009733	0.287496	0.120792	2.3801	0.0173082	0.208635	Tfcp2
ENSMUSG00000089940	0.710215	0.298644	2.37813	0.0174006	0.209605	Gm4117
ENSMUSG00000038400	-0.506267	0.213048	-2.3763	0.017487	0.210502	Pmepa1
ENSMUSG00000036249	0.315358	0.132725	2.37602	0.0175007	0.210523	Rbm43
ENSMUSG00000019822	0.42138	0.177367	2.37575	0.0175135	0.210533	Smpd2
ENSMUSG00000038074	0.408534	0.172076	2.37414	0.0175897	0.211305	Fkbp14
ENSMUSG00000053483	0.268218	0.112998	2.37365	0.0176132	0.211443	Usp21
ENSMUSG00000089449	0.989911	0.417437	2.3714	0.0177207	0.212588
ENSMUSG00000022445	1.21962	0.514506	2.37046	0.0177659	0.212875	Cyp2d26
ENSMUSG00000048644	-0.376344	0.158768	-2.3704	0.0177689	0.212875	Ctxn1
ENSMUSG00000037887	-0.364962	0.153991	-2.37003	0.0177868	0.212946	Dusp8
ENSMUSG00000021759	0.309011	0.130417	2.3694	0.017817	0.213005	Ppap2a
ENSMUSG00000060550	0.894502	0.3776	2.36892	0.0178403	0.213005	H2-Q7
ENSMUSG00000060550	0.894502	0.3776	2.36892	0.0178403	0.213005	H2-Q7
ENSMUSG00000060550	0.894502	0.3776	2.36892	0.0178403	0.213005	H2-Q7
ENSMUSG00000060550	0.894502	0.3776	2.36892	0.0178403	0.213005	H2-Q7
ENSMUSG00000065734	-0.737486	0.311305	-2.36901	0.0178356	0.213005	Snord49a
ENSMUSG00000091994	-0.400212	0.168931	-2.36908	0.0178322	0.213005	E130317F20Rik
ENSMUSG00000026887	-0.278867	0.117747	-2.36836	0.0178669	0.213179	Mrrf
ENSMUSG00000065627	-1.40709	0.594245	-2.36786	0.0178911	0.213323
ENSMUSG00000024740	-0.131696	0.0556488	-2.36656	0.0179543	0.213568	Ddb1
ENSMUSG00000039357	0.27451	0.116001	2.36644	0.0179603	0.213568	Fut11
ENSMUSG00000075803	1.05017	0.443651	2.36711	0.0179274	0.213568
ENSMUSG00000093098	-2.43964	1.03083	-2.36666	0.0179492	0.213568	Mir5102
ENSMUSG00000039717	-0.243679	0.103026	-2.36521	0.0180196	0.214129	Ralyl
ENSMUSG00000064036	0.608367	0.257315	2.36428	0.0180649	0.214522	Mro
ENSMUSG00000028633	-0.282447	0.119523	-2.36312	0.018122	0.215055	Ctps
ENSMUSG00000023030	-0.314441	0.133104	-2.36237	0.0181585	0.215343	Slc11a2
ENSMUSG00000026605	0.560724	0.237392	2.36202	0.0181759	0.215404	Cenpf
ENSMUSG00000068740	0.241672	0.102343	2.36139	0.0182065	0.215621	Celsr2
ENSMUSG00000032827	0.174991	0.0741183	2.36097	0.0182273	0.215722	Ppp1r9a
ENSMUSG00000028991	0.19171	0.0812088	2.36071	0.01824	0.215728	Mtor
ENSMUSG00000035367	-0.333098	0.141192	-2.35919	0.0183149	0.216467	Rmi1
ENSMUSG00000037070	-0.235011	0.0996454	-2.35847	0.0183503	0.21674	Rbmxl1
ENSMUSG00000037143	0.791174	0.335509	2.35813	0.0183671	0.216793	4930529M08Rik
ENSMUSG00000037143	0.791174	0.335509	2.35813	0.0183671	0.216793	4930529M08Rik
ENSMUSG00000031828	0.573885	0.243435	2.35744	0.0184012	0.217051	Klhl36
ENSMUSG00000040929	-0.608599	0.258365	-2.35558	0.018494	0.217998	Rfx3
ENSMUSG00000028064	0.28589	0.121486	2.35327	0.0186093	0.21921	Sema4a
ENSMUSG00000058997	0.213773	0.0908547	2.35291	0.018627	0.219273	1300010F03Rik
ENSMUSG00000025470	-0.314503	0.133687	-2.35252	0.0186465	0.219356	Zfp511
ENSMUSG00000019876	0.725768	0.308634	2.35155	0.0186954	0.219637	Pkib
ENSMUSG00000073455	0.298886	0.127098	2.35161	0.0186921	0.219637	Gm3435
ENSMUSG00000036019	-0.860508	0.366081	-2.35059	0.0187436	0.219909	Tmtc2
ENSMUSG00000063382	0.25697	0.109317	2.35069	0.0187387	0.219909	Bcl9l
ENSMUSG00000032487	-1.92064	0.817495	-2.34943	0.0188024	0.220452	Ptgs2
ENSMUSG00000022994	0.322727	0.137413	2.34859	0.0188445	0.220521	Adcy6
ENSMUSG00000028975	0.204502	0.0870753	2.34856	0.0188459	0.220521	Pex14
ENSMUSG00000083397	0.800453	0.340757	2.34905	0.0188216	0.220521	Gm5466
ENSMUSG00000039637	0.353009	0.150363	2.34771	0.018889	0.220878	Coro7
ENSMUSG00000022200	-0.281289	0.119869	-2.34663	0.018944	0.221374	Golph3
ENSMUSG00000035513	-0.633782	0.270167	-2.34589	0.0189815	0.221553	Ntng2
ENSMUSG00000093333	-0.744261	0.317269	-2.34584	0.0189845	0.221553
ENSMUSG00000021686	0.349995	0.149225	2.34542	0.0190057	0.221653	Ap3b1
ENSMUSG00000002107	-0.320359	0.136661	-2.34418	0.0190689	0.222096	Celf2
ENSMUSG00000066233	-0.386193	0.164733	-2.34435	0.0190601	0.222096	Tmem42
ENSMUSG00000025931	-0.403811	0.17242	-2.34203	0.0191793	0.222991	Paqr8
ENSMUSG00000070561	0.326745	0.139519	2.34194	0.0191838	0.222991	Kcnj11
ENSMUSG00000075585	-0.478899	0.204472	-2.34213	0.0191743	0.222991	6330403L08Rik
ENSMUSG00000046721	-0.644375	0.275247	-2.34108	0.0192282	0.22336	Rpl14-ps1
ENSMUSG00000032332	-0.676129	0.288912	-2.34026	0.0192701	0.223663	Col12a1
ENSMUSG00000036918	0.466498	0.199352	2.34008	0.0192798	0.223663	Ttc7
ENSMUSG00000091313	0.923828	0.394847	2.33971	0.0192986	0.223734	Fth-ps2
ENSMUSG00000022594	-0.401241	0.171592	-2.33834	0.0193695	0.224113	Lynx1
ENSMUSG00000031604	-0.445923	0.19067	-2.33872	0.0193499	0.224113	Sc4mol
ENSMUSG00000057530	0.239444	0.102395	2.33843	0.0193649	0.224113	Ece1
ENSMUSG00000019054	-0.40321	0.172518	-2.33721	0.0194284	0.22427	Fis1
ENSMUSG00000029610	-0.318816	0.136416	-2.3371	0.0194341	0.22427	Aimp2
ENSMUSG00000029673	0.308978	0.132187	2.33742	0.0194172	0.22427	Auts2
ENSMUSG00000052632	0.176521	0.0755249	2.33726	0.0194255	0.22427	Asap2
ENSMUSG00000038244	-0.484401	0.207371	-2.33591	0.0194958	0.224821	Mical2
ENSMUSG00000070305	-0.508012	0.217499	-2.33569	0.0195074	0.224821	Mpzl3
ENSMUSG00000037108	-0.473529	0.202805	-2.3349	0.0195487	0.225149	Zcwpw1
ENSMUSG00000021270	-0.198968	0.0852286	-2.33452	0.0195684	0.225229	Hsp90aa1
ENSMUSG00000024883	-0.648004	0.277637	-2.334	0.0195958	0.225249	Rin1
ENSMUSG00000059647	-0.408742	0.175117	-2.33411	0.0195901	0.225249	Gm10068
ENSMUSG00000059647	-0.408742	0.175117	-2.33411	0.0195901	0.225249	Gm10068
ENSMUSG00000059647	-0.408742	0.175117	-2.33411	0.0195901	0.225249	Gm10068
ENSMUSG00000000776	-0.190821	0.0817945	-2.33293	0.0196518	0.225485	Polr3d
ENSMUSG00000024736	-0.502582	0.215429	-2.33294	0.0196512	0.225485	Tmem132a
ENSMUSG00000044390	0.523558	0.224439	2.33274	0.0196618	0.225485	Tigd3
ENSMUSG00000083454	-0.805744	0.345423	-2.33263	0.0196676	0.225485	Gm13226
ENSMUSG00000036480	-1.58615	0.68016	-2.33203	0.0196992	0.225701	Prss56
ENSMUSG00000005354	-0.238501	0.102306	-2.33126	0.0197398	0.225793	Txn2
ENSMUSG00000011831	0.193895	0.0831627	2.33152	0.0197261	0.225793	Evi5
ENSMUSG00000060985	0.599588	0.257208	2.33114	0.0197458	0.225793	Tdrd5
ENSMUSG00000029576	0.425595	0.182641	2.33023	0.019794	0.226055	Radil
ENSMUSG00000079553	0.50315	0.215946	2.32998	0.0198073	0.226055	Kifc1
ENSMUSG00000083152	0.988378	0.424157	2.33022	0.0197946	0.226055	Apc-ps1
ENSMUSG00000087574	-0.679264	0.291584	-2.32957	0.019829	0.226156	C030037D09Rik
ENSMUSG00000048126	0.735716	0.315901	2.32895	0.019862	0.226385	Col6a3
ENSMUSG00000034413	-0.308601	0.132532	-2.32851	0.0198852	0.226504	Neurl1b
ENSMUSG00000084898	-0.635099	0.272821	-2.3279	0.0199176	0.226726	Gm12371
ENSMUSG00000028889	-0.279685	0.120159	-2.32763	0.0199315	0.226737	Yrdc
ENSMUSG00000032020	-0.433225	0.186212	-2.32651	0.0199912	0.22727	Ubash3b
ENSMUSG00000035329	-0.483261	0.207857	-2.32497	0.0200738	0.227914	Fbxo33
ENSMUSG00000054871	-0.502384	0.216061	-2.32519	0.0200618	0.227914	Tmem158
ENSMUSG00000026434	-0.265281	0.114137	-2.32423	0.0201133	0.22812	Nucks1
ENSMUSG00000090867	-0.570349	0.245402	-2.32414	0.020118	0.22812	Snhg1
ENSMUSG00000066442	0.378056	0.162705	2.32357	0.0201488	0.228323	Mthfs
ENSMUSG00000018372	0.356701	0.153579	2.3226	0.0202008	0.228506	Ccdc45
ENSMUSG00000020564	0.340154	0.146458	2.32254	0.020204	0.228506	Atxn7l1
ENSMUSG00000064994	-0.618861	0.266431	-2.32278	0.0201907	0.228506
ENSMUSG00000003279	-0.344679	0.148494	-2.32116	0.0202783	0.229172	Dlgap1
ENSMUSG00000034009	-0.5528	0.238177	-2.32096	0.0202889	0.229172	Rxfp1
ENSMUSG00000071064	0.38928	0.167787	2.32008	0.0203365	0.229562	Zfp827
ENSMUSG00000049649	-0.829966	0.357955	-2.31863	0.020415	0.230259	Gpr3
ENSMUSG00000067292	1.27789	0.551182	2.31846	0.0204244	0.230259	Gm10203
ENSMUSG00000059820	-0.244676	0.105592	-2.31718	0.0204939	0.230894	AU019823
ENSMUSG00000021481	0.317943	0.137233	2.31682	0.0205136	0.230969	Zfp346
ENSMUSG00000018736	-0.316396	0.136589	-2.31641	0.0205361	0.231074	Ndel1
ENSMUSG00000027978	-0.330792	0.142856	-2.31556	0.0205822	0.231445	Prss12
ENSMUSG00000019768	-0.724015	0.31301	-2.31307	0.0207186	0.231645	Esr1
ENSMUSG00000022101	0.8447	0.365051	2.31393	0.0206718	0.231645	Fgf17
ENSMUSG00000025157	-0.204118	0.088193	-2.31445	0.0206431	0.231645	Zdhhc16
ENSMUSG00000025917	-0.232266	0.100384	-2.31376	0.0206806	0.231645	Cops5
ENSMUSG00000027977	-0.692109	0.299196	-2.31323	0.02071	0.231645	Ndst3
ENSMUSG00000029778	0.339171	0.146615	2.31334	0.0207039	0.231645	Adcyap1r1
ENSMUSG00000031066	0.165318	0.0714654	2.31326	0.0207084	0.231645	Usp11
ENSMUSG00000036555	0.268169	0.115862	2.31455	0.0206375	0.231645	Iqce
ENSMUSG00000075854	-1.51073	0.652982	-2.31358	0.0206908	0.231645
ENSMUSG00000003032	-1.54114	0.666603	-2.31193	0.0207816	0.231682	Klf4
ENSMUSG00000024805	-0.648884	0.280676	-2.31186	0.0207853	0.231682	Pcgf5
ENSMUSG00000040701	0.660398	0.285662	2.31182	0.0207878	0.231682	Ap1g2
ENSMUSG00000043895	-0.710808	0.307421	-2.31217	0.0207685	0.231682	S1pr2
ENSMUSG00000070889	-0.50088	0.216619	-2.31226	0.0207632	0.231682	Pgap1
ENSMUSG00000031976	-0.259269	0.112237	-2.31001	0.0208875	0.232647	Urb2
ENSMUSG00000010660	0.613406	0.26559	2.3096	0.0209104	0.232748	Plcd1
ENSMUSG00000037111	-0.359355	0.155607	-2.30937	0.0209231	0.232748	Setd7
ENSMUSG00000037813	0.636385	0.275761	2.30774	0.0210135	0.233458	D630003M21Rik
ENSMUSG00000038042	0.245567	0.106401	2.30794	0.0210026	0.233458	Ptpdc1
ENSMUSG00000026020	-0.286431	0.124178	-2.30662	0.0210759	0.233561	Nop58
ENSMUSG00000028995	0.263383	0.114156	2.30722	0.0210426	0.233561	Fam126a
ENSMUSG00000031103	-1.07994	0.468159	-2.30679	0.0210666	0.233561	Elf4
ENSMUSG00000085138	1.47247	0.638303	2.30686	0.0210628	0.233561	Gm16738
ENSMUSG00000029624	0.339752	0.147328	2.30609	0.0211055	0.233743	Ptcd1
ENSMUSG00000047434	0.339425	0.14722	2.30556	0.0211351	0.233922	AI480653
ENSMUSG00000043639	0.477851	0.207309	2.30501	0.0211658	0.234115	Rbm20
ENSMUSG00000000631	0.331527	0.143939	2.30325	0.0212649	0.235063	Myo18a
ENSMUSG00000019828	0.39216	0.170314	2.30257	0.0213033	0.23534	Grm1
ENSMUSG00000030337	0.437303	0.190034	2.30118	0.0213813	0.236053	Vamp1
ENSMUSG00000014592	0.252076	0.109615	2.29966	0.0214677	0.236414	Camta1
ENSMUSG00000022012	-0.328427	0.142807	-2.2998	0.0214598	0.236414	Enox1
ENSMUSG00000033684	0.36483	0.158628	2.29991	0.0214531	0.236414	Qsox1
ENSMUSG00000082765	0.855579	0.372014	2.29986	0.0214563	0.236414	Gm14411
ENSMUSG00000017288	0.158712	0.0690395	2.29886	0.0215131	0.236765	Vps53
ENSMUSG00000031987	-0.252563	0.109897	-2.29818	0.0215514	0.23689	Egln1
ENSMUSG00000085685	0.877688	0.381895	2.29824	0.021548	0.23689	Gm15253
ENSMUSG00000020700	0.335308	0.145999	2.29665	0.0216387	0.237404	Map3k3
ENSMUSG00000042961	0.967585	0.421283	2.29676	0.0216327	0.237404	Egflam
ENSMUSG00000044519	0.68324	0.297467	2.29686	0.0216269	0.237404	Zfp488
ENSMUSG00000025034	0.335253	0.146094	2.29477	0.0217461	0.238341	Trim8
ENSMUSG00000048279	0.36144	0.157512	2.29469	0.0217512	0.238341	Sacs
ENSMUSG00000042680	-0.343475	0.149729	-2.29397	0.0217921	0.238344	Fam59a
ENSMUSG00000051427	0.260568	0.113576	2.29423	0.0217774	0.238344	Ccdc157
ENSMUSG00000087320	0.806215	0.351433	2.29408	0.021786	0.238344	Gm16613
ENSMUSG00000034024	-0.228569	0.0996644	-2.29338	0.0218259	0.238565	Cct2
ENSMUSG00000048138	-1.04787	0.457222	-2.29182	0.021916	0.239253	Dmrt2
ENSMUSG00000075729	-1.19206	0.520111	-2.29193	0.0219096	0.239253
ENSMUSG00000087529	1.46964	0.641987	2.2892	0.0220675	0.240757	C130060C02Rik
ENSMUSG00000059309	0.496984	0.217129	2.28889	0.022086	0.24081	Hist1h3f
ENSMUSG00000059309	0.496984	0.217129	2.28889	0.022086	0.24081	Hist1h3f
ENSMUSG00000059309	0.496984	0.217129	2.28889	0.022086	0.24081	Hist1h3f
ENSMUSG00000059309	0.496984	0.217129	2.28889	0.022086	0.24081	Hist1h3f
ENSMUSG00000059309	0.496984	0.217129	2.28889	0.022086	0.24081	Hist1h3f
ENSMUSG00000059309	0.496984	0.217129	2.28889	0.022086	0.24081	Hist1h3f
ENSMUSG00000059309	0.496984	0.217129	2.28889	0.022086	0.24081	Hist1h3f
ENSMUSG00000059309	0.496984	0.217129	2.28889	0.022086	0.24081	Hist1h3f
ENSMUSG00000027994	-0.898003	0.392376	-2.28863	0.0221008	0.240822	Ccdc109b
ENSMUSG00000041075	-0.645623	0.282191	-2.28789	0.0221438	0.241141	Fzd7
ENSMUSG00000001964	-0.462797	0.20234	-2.28722	0.0221828	0.241206	Emd
ENSMUSG00000035179	0.736671	0.322103	2.28707	0.022192	0.241206	Ppp1r32
ENSMUSG00000051177	-0.367975	0.16089	-2.28712	0.0221887	0.241206	Plcb1
ENSMUSG00000071567	-0.337202	0.147453	-2.28685	0.0222046	0.241206	A830039N20Rik
ENSMUSG00000056598	0.363959	0.159194	2.28626	0.0222389	0.241429	Lrrc48
ENSMUSG00000022840	0.303739	0.132899	2.28548	0.0222846	0.241776	Adcy5
ENSMUSG00000078528	0.827067	0.361963	2.28495	0.0223157	0.241964	Gm17068
ENSMUSG00000030942	-0.292157	0.127892	-2.2844	0.022348	0.242166	Thumpd1
ENSMUSG00000034674	-0.285631	0.125127	-2.28273	0.0224465	0.243083	Tdg
ENSMUSG00000034674	-0.285631	0.125127	-2.28273	0.0224465	0.243083	Tdg
ENSMUSG00000020707	0.810316	0.355159	2.28155	0.0225156	0.243382	Rnf135
ENSMUSG00000031429	-0.359546	0.157566	-2.28188	0.0224967	0.243382	Psmd10
ENSMUSG00000040272	0.567032	0.24852	2.28164	0.0225109	0.243382	Accs
ENSMUSG00000038271	0.328263	0.143936	2.28062	0.022571	0.24383	Iffo1
ENSMUSG00000067212	0.510819	0.224011	2.28033	0.0225884	0.243868	H2-T23
ENSMUSG00000034932	-0.357201	0.156729	-2.2791	0.0226612	0.244505	Mrpl54
ENSMUSG00000013701	-0.200551	0.0880751	-2.27704	0.0227838	0.245076	Timm23
ENSMUSG00000041797	0.480587	0.211051	2.27712	0.0227793	0.245076	Abca9
ENSMUSG00000051220	0.840774	0.369127	2.27774	0.0227423	0.245076	Ercc6l
ENSMUSG00000060548	0.306916	0.134759	2.27752	0.0227553	0.245076	Tnfrsf19
ENSMUSG00000092509	1.68123	0.738217	2.27742	0.0227609	0.245076	Gm20394
ENSMUSG00000037531	-0.317219	0.139386	-2.27583	0.0228559	0.245701	Mrpl47
ENSMUSG00000006241	0.375365	0.165087	2.27373	0.022982	0.246826	Ccdc159
ENSMUSG00000024270	-0.159685	0.0702338	-2.27362	0.0229886	0.246826	Slc39a6
ENSMUSG00000000276	0.256321	0.112764	2.27309	0.023021	0.246872	Dgke
ENSMUSG00000093000	0.606804	0.26695	2.2731	0.0230199	0.246872
ENSMUSG00000078612	0.855967	0.376678	2.27241	0.0230617	0.247157	1700024P16Rik
ENSMUSG00000027397	-0.465073	0.204931	-2.26941	0.0232432	0.248674	Slc20a1
ENSMUSG00000054951	1.44535	0.636894	2.26937	0.0232455	0.248674	9130008F23Rik
ENSMUSG00000085220	0.782421	0.344704	2.26983	0.0232177	0.248674	Gm12521
ENSMUSG00000027799	-0.260495	0.114832	-2.26848	0.0232999	0.248992	Nbea
ENSMUSG00000046219	-0.986279	0.434831	-2.26819	0.0233178	0.248992	C230012O17Rik
ENSMUSG00000058523	-1.67692	0.739294	-2.26827	0.0233129	0.248992	Mup5
ENSMUSG00000071037	0.338858	0.149414	2.26792	0.0233343	0.249017	1700106N22Rik
ENSMUSG00000091829	0.651876	0.287485	2.26751	0.0233589	0.249129	9330159M07Rik
ENSMUSG00000007021	-0.29061	0.128182	-2.26716	0.0233806	0.249208	Syngr3
ENSMUSG00000000605	-0.173485	0.0765355	-2.26673	0.023407	0.249339	Clcn4-2
ENSMUSG00000023972	0.324987	0.143414	2.26608	0.0234466	0.249516	Ptk7
ENSMUSG00000055541	0.930886	0.410807	2.26599	0.023452	0.249516	Lair1
ENSMUSG00000021217	-0.414534	0.182961	-2.26569	0.0234703	0.24956	Tshz3
ENSMUSG00000058740	0.349382	0.154225	2.26541	0.0234876	0.249593	Kcnt1
ENSMUSG00000075863	-4.29306	1.89569	-2.26464	0.0235347	0.249943	n-R5s118
ENSMUSG00000018770	-0.371882	0.164403	-2.26202	0.0236964	0.250029	Atp5g3
ENSMUSG00000020844	0.451289	0.199545	2.26159	0.0237225	0.250029	Nxn
ENSMUSG00000022307	-0.411094	0.181684	-2.26268	0.0236552	0.250029	Oxr1
ENSMUSG00000022744	-0.359447	0.158866	-2.26258	0.0236617	0.250029	Cldn25
ENSMUSG00000023068	-0.170792	0.0755098	-2.26185	0.0237067	0.250029	Nus1
ENSMUSG00000023912	0.327864	0.144954	2.26186	0.0237062	0.250029	Slc25a27
ENSMUSG00000024436	-0.264854	0.117081	-2.26215	0.0236884	0.250029	Mrps18b
ENSMUSG00000030595	-0.362263	0.160113	-2.26254	0.0236639	0.250029	Nfkbib
ENSMUSG00000054702	0.702188	0.310469	2.2617	0.0237159	0.250029	Ap1s3
ENSMUSG00000060882	-0.426947	0.188693	-2.26266	0.0236568	0.250029	Kcnd2
ENSMUSG00000090223	-0.72803	0.321587	-2.26387	0.0235821	0.250029	Pcp4
ENSMUSG00000092048	0.792985	0.350644	2.26151	0.0237276	0.250029	Vmn2r85
ENSMUSG00000093661	0.306728	0.135611	2.26182	0.0237085	0.250029
ENSMUSG00000089901	-0.929486	0.411072	-2.26112	0.0237516	0.250131	Gm8113
ENSMUSG00000002227	0.474926	0.210069	2.26081	0.0237709	0.250184	Mov10
ENSMUSG00000024812	-0.69155	0.306158	-2.25881	0.0238955	0.250874	Tjp2
ENSMUSG00000025370	-0.702477	0.310967	-2.259	0.0238831	0.250874	Cdh9
ENSMUSG00000026220	0.418371	0.185234	2.25861	0.0239077	0.250874	Slc16a14
ENSMUSG00000058779	-0.39102	0.173057	-2.25949	0.023853	0.250874	Tomm20
ENSMUSG00000079043	-0.389519	0.172412	-2.25924	0.0238687	0.250874	Fastkd5
ENSMUSG00000005683	-0.134078	0.0594034	-2.25707	0.0240036	0.250981	Cs
ENSMUSG00000006920	0.295808	0.131018	2.25777	0.02396	0.250981	Ezh1
ENSMUSG00000014303	0.319867	0.141701	2.25734	0.0239871	0.250981	Glis2
ENSMUSG00000025764	-0.312417	0.138364	-2.25794	0.0239496	0.250981	Phf17
ENSMUSG00000062373	-0.309565	0.137151	-2.25711	0.0240009	0.250981	Tmem65
ENSMUSG00000062760	-0.337334	0.149439	-2.25734	0.0239868	0.250981	1810041L15Rik
ENSMUSG00000041482	-1.33892	0.593556	-2.25576	0.0240856	0.251689	Fam38b
ENSMUSG00000006010	-0.33481	0.148466	-2.25513	0.0241249	0.251798	BC003331
ENSMUSG00000006589	-0.347354	0.154109	-2.25395	0.0241995	0.251798	Aprt
ENSMUSG00000021248	-0.318836	0.141404	-2.25479	0.0241467	0.251798	Tmed10
ENSMUSG00000021248	-0.318836	0.141404	-2.25479	0.0241467	0.251798	Tmed10
ENSMUSG00000021546	-0.291533	0.129353	-2.25377	0.0242105	0.251798	Hnrnpk
ENSMUSG00000034532	0.293967	0.130392	2.25448	0.0241658	0.251798	Fbxo16
ENSMUSG00000039384	-1.04672	0.4641	-2.25537	0.0241104	0.251798	Dusp10
ENSMUSG00000053025	0.374248	0.166006	2.25442	0.0241696	0.251798	Sv2b
ENSMUSG00000055493	0.284218	0.126084	2.2542	0.0241836	0.251798	Epm2a
ENSMUSG00000021986	0.316953	0.140687	2.2529	0.0242656	0.252072	Fam123a
ENSMUSG00000034573	0.612024	0.271647	2.25302	0.0242581	0.252072	Ptpn13
ENSMUSG00000021375	0.240257	0.106665	2.25246	0.0242935	0.252214	Kif13a
ENSMUSG00000005873	-0.203193	0.0902311	-2.25192	0.0243272	0.252235	Reep5
ENSMUSG00000036863	0.422822	0.187759	2.25194	0.0243259	0.252235	Syde2
ENSMUSG00000075804	-3.16342	1.40488	-2.25174	0.0243386	0.252235	n-R5s149
ENSMUSG00000075810	0.706043	0.313612	2.25132	0.024365	0.25236
ENSMUSG00000023456	-0.403783	0.179414	-2.25056	0.0244135	0.252713	Tpi1
ENSMUSG00000040811	0.426366	0.189516	2.24976	0.0244643	0.25309	Eml2
ENSMUSG00000018405	-0.42556	0.189278	-2.24834	0.0245546	0.25375	Mrm1
ENSMUSG00000036572	0.392526	0.174588	2.2483	0.024557	0.25375	Upf3b
ENSMUSG00000056856	0.335264	0.149149	2.24785	0.0245859	0.2539	Jakmip3
ENSMUSG00000053889	1.62273	0.722008	2.24752	0.0246068	0.253967	A130066N16Rik
ENSMUSG00000086180	-0.683873	0.3046	-2.24515	0.0247584	0.255382	Rmst
ENSMUSG00000057440	0.434616	0.193643	2.24442	0.0248053	0.255716	Mpp7
ENSMUSG00000021244	0.214468	0.0955962	2.24347	0.0248663	0.256026	Ylpm1
ENSMUSG00000021457	-0.82272	0.366824	-2.24282	0.0249086	0.256026	Syk
ENSMUSG00000034919	0.66451	0.296325	2.24251	0.0249287	0.256026	Ttc22
ENSMUSG00000040374	-0.244491	0.109032	-2.24237	0.0249373	0.256026	Pxmp3
ENSMUSG00000064043	0.412287	0.183815	2.24295	0.0249	0.256026	Trerf1
ENSMUSG00000072568	-0.584955	0.260774	-2.24315	0.0248873	0.256026	Fam84b
ENSMUSG00000082487	1.40057	0.624457	2.24286	0.0249057	0.256026	Gm11628
ENSMUSG00000027673	-0.331728	0.148024	-2.24104	0.0250236	0.256247	Ndufb5
ENSMUSG00000035045	0.225913	0.100785	2.24153	0.024992	0.256247	Zc3h12b
ENSMUSG00000036915	1.27395	0.568428	2.24119	0.0250141	0.256247	Kirrel2
ENSMUSG00000054165	1.23455	0.550911	2.24091	0.0250317	0.256247	4922502B01Rik
ENSMUSG00000090256	0.65838	0.293745	2.24133	0.0250044	0.256247	Alms1-ps1
ENSMUSG00000045515	0.36808	0.164271	2.24068	0.0250468	0.256252	Pou3f3
ENSMUSG00000091415	0.759523	0.33903	2.24028	0.0250727	0.256369	Akd1
ENSMUSG00000000125	0.449297	0.200706	2.23858	0.0251833	0.257073	Wnt3
ENSMUSG00000085226	-0.935565	0.417934	-2.23855	0.0251854	0.257073	Gm7855
ENSMUSG00000090084	0.888068	0.396697	2.23865	0.0251784	0.257073	Srpx
ENSMUSG00000006732	-0.420708	0.187986	-2.23797	0.0252229	0.257172	Mettl1
ENSMUSG00000020895	-0.455635	0.203613	-2.23776	0.025237	0.257172	Tmem107
ENSMUSG00000033697	0.202753	0.090607	2.23772	0.025239	0.257172	Arhgap39
ENSMUSG00000050786	0.396081	0.177084	2.23668	0.0253073	0.257718	Ccdc126
ENSMUSG00000004113	0.251471	0.112451	2.23628	0.0253333	0.257771	Cacna1b
ENSMUSG00000053166	-0.569582	0.254715	-2.23615	0.0253418	0.257771	Cdh22
ENSMUSG00000048379	0.309465	0.138413	2.2358	0.0253647	0.257855	Socs4
ENSMUSG00000067356	0.919236	0.411295	2.23498	0.0254188	0.258255	B430203G13Rik
ENSMUSG00000038593	0.334821	0.149835	2.23459	0.025444	0.258362	Tctn1
ENSMUSG00000041842	0.565652	0.253209	2.23393	0.0254876	0.258527	Fhdc1
ENSMUSG00000058741	1.79149	0.801958	2.2339	0.0254896	0.258527	Prr19
ENSMUSG00000052942	-0.623294	0.279052	-2.23362	0.0255084	0.258541	Glis3
ENSMUSG00000057963	-0.217321	0.0973038	-2.23343	0.0255204	0.258541	Itpk1
ENSMUSG00000022112	-0.418001	0.187179	-2.23315	0.0255388	0.258578	Gpc5
ENSMUSG00000031683	-0.195814	0.0877011	-2.23274	0.0255659	0.258704	Lsm6
ENSMUSG00000009731	0.283236	0.126883	2.23225	0.0255982	0.258733	Kcnd1
ENSMUSG00000022054	0.64597	0.289372	2.23232	0.0255941	0.258733	Nefm
ENSMUSG00000022545	0.380458	0.170526	2.23109	0.0256754	0.258789	Ercc4
ENSMUSG00000043298	0.529888	0.237459	2.23149	0.0256485	0.258789	C030030A07Rik
ENSMUSG00000044813	-0.497892	0.223155	-2.23115	0.0256714	0.258789	Shb
ENSMUSG00000046324	0.336747	0.150884	2.23183	0.0256265	0.258789	Ermp1
ENSMUSG00000057818	0.607475	0.272281	2.23106	0.0256773	0.258789	1600029O15Rik
ENSMUSG00000030621	0.40754	0.182696	2.23071	0.0257007	0.258876	Me3
ENSMUSG00000017781	-0.216212	0.0969385	-2.23041	0.0257205	0.258928	Pitpna
ENSMUSG00000029761	0.430536	0.19308	2.22983	0.0257586	0.259163	Cald1
ENSMUSG00000073421	-0.791724	0.355341	-2.22807	0.0258759	0.260045	H2-Ab1
ENSMUSG00000086469	1.04935	0.470969	2.22807	0.0258758	0.260045	Gm16897
ENSMUSG00000023829	1.59228	0.714985	2.22702	0.0259461	0.260353	Slc22a1
ENSMUSG00000074981	1.32664	0.595684	2.22708	0.0259419	0.260353	Dcdc5
ENSMUSG00000078716	-0.302464	0.135822	-2.22691	0.0259531	0.260353	Tmem8b
ENSMUSG00000083696	-2.24179	1.00677	-2.22672	0.0259657	0.260353	Gm12563
ENSMUSG00000072872	-0.388205	0.174457	-2.22523	0.0260661	0.26121	Rybp
ENSMUSG00000031295	0.256299	0.115202	2.22478	0.0260963	0.261364	Phka2
ENSMUSG00000002625	0.234458	0.105432	2.22378	0.0261633	0.261643	Akap8l
ENSMUSG00000021253	0.441707	0.198617	2.22391	0.0261544	0.261643	Tgfb3
ENSMUSG00000038112	0.736305	0.331119	2.22368	0.0261697	0.261643	AW551984
ENSMUSG00000065649	-0.620981	0.279284	-2.22348	0.0261836	0.261643	Snora74a
ENSMUSG00000052419	-0.521365	0.23455	-2.22283	0.0262273	0.261931	2610001J05Rik
ENSMUSG00000019146	0.355783	0.160152	2.22154	0.0263146	0.262654	Cacng2
ENSMUSG00000032849	0.431112	0.19409	2.22119	0.0263379	0.262736	Abcc4
ENSMUSG00000086228	0.673786	0.303412	2.22069	0.0263716	0.262924	Gm514
ENSMUSG00000036923	0.534974	0.240952	2.22025	0.0264016	0.263073	Stox1
ENSMUSG00000026229	-0.183117	0.0824986	-2.21964	0.0264433	0.263191	Psmd1
ENSMUSG00000042682	-0.298996	0.134697	-2.21977	0.0264346	0.263191	Selk
ENSMUSG00000039286	-0.418425	0.18858	-2.21882	0.0264987	0.263572	Fndc3b
ENSMUSG00000073403	0.732712	0.330253	2.21864	0.0265115	0.263572	Gm10499
ENSMUSG00000032202	0.979264	0.441556	2.21776	0.0265713	0.264016	Rab27a
ENSMUSG00000034203	-0.312769	0.141117	-2.21638	0.0266652	0.2648	Chchd4
ENSMUSG00000040560	0.220829	0.0996455	2.21615	0.0266811	0.264809	Wdr7
ENSMUSG00000058361	-0.650976	0.293812	-2.21562	0.0267175	0.26502	Lhfpl3
ENSMUSG00000047773	1.06859	0.482563	2.21441	0.0268004	0.265692	Ankfn1
ENSMUSG00000033854	-0.200221	0.0904932	-2.21255	0.0269285	0.266646	Kcnk10
ENSMUSG00000044894	-0.264418	0.119496	-2.21278	0.0269128	0.266646	Uqcrq
ENSMUSG00000047986	0.586352	0.265035	2.21236	0.026942	0.266646	Palm3
ENSMUSG00000055067	0.215075	0.097274	2.21103	0.027034	0.267406	Smyd3
ENSMUSG00000008384	-0.892678	0.40395	-2.20987	0.0271142	0.268048	Sertad1
ENSMUSG00000028799	0.300914	0.136206	2.20926	0.0271564	0.268314	Zfp362
ENSMUSG00000034151	0.699121	0.316539	2.20864	0.0271998	0.26835	Zbbx
ENSMUSG00000060735	-0.578547	0.261957	-2.20855	0.0272058	0.26835	Rxfp3
ENSMUSG00000065703	-1.48051	0.670258	-2.20886	0.0271842	0.26835
ENSMUSG00000026134	0.350361	0.158696	2.20774	0.0272622	0.268655	Prim2
ENSMUSG00000065245	-1.38531	0.627497	-2.20767	0.0272673	0.268655
ENSMUSG00000020140	-1.0898	0.49399	-2.20612	0.0273756	0.269571	Lgr5
ENSMUSG00000074748	-0.17344	0.0787323	-2.2029	0.0276017	0.271646	Atxn7l3b
ENSMUSG00000018196	-0.431921	0.196163	-2.20185	0.0276758	0.272169	Glrx2
ENSMUSG00000022656	-0.419136	0.190368	-2.20171	0.0276858	0.272169	Pvrl3
ENSMUSG00000001300	-0.204236	0.0927788	-2.20132	0.0277136	0.272204	Efnb2
ENSMUSG00000085525	-0.504466	0.229175	-2.20122	0.0277203	0.272204	Gm13166
ENSMUSG00000027962	-0.706381	0.320977	-2.20073	0.0277554	0.272397	Vcam1
ENSMUSG00000001473	-0.801262	0.364226	-2.19991	0.0278136	0.272816	Tubb6
ENSMUSG00000015776	0.255999	0.116401	2.19929	0.0278571	0.27309	Med22
ENSMUSG00000029500	-0.248751	0.113167	-2.19808	0.0279437	0.273426	Pgam5
ENSMUSG00000031171	-0.227316	0.103427	-2.19784	0.0279607	0.273426	Ftsj1
ENSMUSG00000032531	0.468084	0.212993	2.19765	0.027974	0.273426	Amotl2
ENSMUSG00000033222	0.866722	0.394256	2.19838	0.0279223	0.273426	Ttf2
ENSMUSG00000043687	0.753116	0.342579	2.19837	0.0279226	0.273426	1190005I06Rik
ENSMUSG00000065191	1.53708	0.699468	2.1975	0.0279847	0.273426
ENSMUSG00000019718	0.778572	0.354579	2.19577	0.0281087	0.274181	2810055F11Rik
ENSMUSG00000053332	-0.446677	0.203391	-2.19615	0.0280811	0.274181	Gas5
ENSMUSG00000085644	0.426832	0.194375	2.19592	0.0280977	0.274181	2310015A10Rik
ENSMUSG00000039810	-0.343148	0.1563	-2.19544	0.0281318	0.274254	Zc3h10
ENSMUSG00000007877	-1.67165	0.761682	-2.19468	0.0281864	0.274634	Tcap
ENSMUSG00000011958	0.289329	0.131854	2.19431	0.0282129	0.27474	Bnip2
ENSMUSG00000022309	0.772125	0.352027	2.19337	0.0282807	0.274943	Angpt1
ENSMUSG00000065327	1.1642	0.530683	2.19378	0.0282509	0.274943
ENSMUSG00000074934	0.790981	0.360615	2.19342	0.0282768	0.274943	Grem1
ENSMUSG00000015829	-0.920465	0.419786	-2.1927	0.0283289	0.275141	Tnr
ENSMUSG00000018566	0.700313	0.319391	2.19265	0.0283323	0.275141	Slc2a4
ENSMUSG00000027967	1.04525	0.476756	2.19241	0.0283496	0.275157	Neurog2
ENSMUSG00000027804	-0.28177	0.128552	-2.19188	0.0283884	0.27523	Ppid
ENSMUSG00000055632	0.737132	0.336282	2.19201	0.028379	0.27523	Hmcn2
ENSMUSG00000026773	0.22786	0.104016	2.19062	0.028479	0.275652	Pfkfb3
ENSMUSG00000028698	0.414608	0.18923	2.19102	0.0284502	0.275652	Pik3r3
ENSMUSG00000035164	-0.563918	0.257403	-2.19079	0.0284667	0.275652	Zc3h12c
ENSMUSG00000058603	-0.505295	0.230737	-2.18992	0.0285303	0.275997	Rpl28-ps1
ENSMUSG00000068732	-0.223958	0.102294	-2.18936	0.028571	0.276239	Tmem167b
ENSMUSG00000045008	0.672621	0.307285	2.18892	0.028603	0.276396	9030612E09Rik
ENSMUSG00000019888	-0.659188	0.301375	-2.18727	0.028723	0.277227	Mgat4c
ENSMUSG00000021621	-0.420389	0.192182	-2.18746	0.0287093	0.277227	Zcchc9
ENSMUSG00000028333	-0.387008	0.176951	-2.18709	0.0287363	0.277227	Anp32b
ENSMUSG00000019066	-0.271314	0.124133	-2.18567	0.0288395	0.277379	Rab3d
ENSMUSG00000022562	0.287419	0.13145	2.18652	0.0287773	0.277379	Oplah
ENSMUSG00000023328	-0.329526	0.150718	-2.18637	0.0287885	0.277379	Ache
ENSMUSG00000039496	0.665382	0.304369	2.1861	0.0288079	0.277379	Cdnf
ENSMUSG00000041193	-1.43271	0.655594	-2.18536	0.0288624	0.277379	Pla2g5
ENSMUSG00000075032	0.429673	0.196613	2.18537	0.0288614	0.277379	Hist1h3i
ENSMUSG00000075032	0.429673	0.196613	2.18537	0.0288614	0.277379	Hist1h3i
ENSMUSG00000075032	0.429673	0.196613	2.18537	0.0288614	0.277379	Hist1h3i
ENSMUSG00000075032	0.429673	0.196613	2.18537	0.0288614	0.277379	Hist1h3i
ENSMUSG00000085973	1.36555	0.62482	2.1855	0.028852	0.277379	Gm14742
ENSMUSG00000034917	0.575749	0.263532	2.18474	0.0289081	0.277533	Tjp3
ENSMUSG00000042532	-0.366307	0.167681	-2.18455	0.0289217	0.277533	Golga7b
ENSMUSG00000046791	-0.491182	0.224849	-2.1845	0.0289258	0.277533	2410016O06Rik
ENSMUSG00000021846	-0.387313	0.177359	-2.18378	0.0289788	0.27789	Peli2
ENSMUSG00000022441	0.412692	0.189157	2.18175	0.0291283	0.279019	Efcab6
ENSMUSG00000022770	-0.434624	0.199203	-2.18182	0.029123	0.279019	Dlg1
ENSMUSG00000005267	0.315106	0.144475	2.18104	0.0291805	0.279215	Zfp287
ENSMUSG00000055633	-0.240184	0.110116	-2.18119	0.0291692	0.279215	Zfp580
ENSMUSG00000065166	-1.47372	0.675777	-2.18077	0.0292002	0.279252
ENSMUSG00000015711	-0.166747	0.0764927	-2.17991	0.0292644	0.27941	Prune
ENSMUSG00000022828	-0.310609	0.142477	-2.18006	0.0292527	0.27941	Gtf2e1
ENSMUSG00000063704	0.440105	0.20187	2.18014	0.029247	0.27941	Mapk15
ENSMUSG00000037542	1.31412	0.603107	2.17892	0.0293376	0.279882	Aldh8a1
ENSMUSG00000038002	0.241757	0.110965	2.17869	0.029355	0.279882	Cramp1l
ENSMUSG00000052534	-0.358655	0.164627	-2.1786	0.0293615	0.279882	Pbx1
ENSMUSG00000040860	0.608448	0.279313	2.17837	0.0293785	0.279891	Crocc
ENSMUSG00000034858	0.435684	0.200045	2.17792	0.0294116	0.280056	BC031353
ENSMUSG00000062309	0.462983	0.212613	2.17758	0.029437	0.280145	Rpp25
ENSMUSG00000057577	0.775646	0.356291	2.177	0.0294804	0.280406	Gm10025
[truncated: 29,365 more rows]
