# Supplementary material for: Cohesin-dependence of neuronal gene expression relates to chromatin loop length
Source: eLife. 2022 Apr 26;11:e76539. doi: 10.7554/eLife.76539 (PMC9106336; doi:10.7554/eLife.76539)
Supplement: Supplementary file 5. [file elife-76539-supp5.xlsx]

## Sheet: TTX
Supplementary Data 6
Total RNAseq NexCre Rad21lox/lox minus wild-type, TTX, KCl1h and KCl 6h
TTX__KO_minus_WT_23092015
rownames(testGenotype_TreatmentZero)	baseMean	log2FoldChange	lfcSE	stat	pvalue	padj
Nwd2	3112.05683877655	-3.37415545107227	0.150443210395953	-22.4281005582891	2.09386946420336e-111	3.53570797725379e-107
Slc17a6	7221.41583373281	2.41319907263647	0.108978781571465	22.1437516353031	1.1983504683007e-108	1.01176730038628e-104
Rad21	2090.80049552909	-1.73568123988778	0.0786330943500113	-22.0731646673081	5.72415452935248e-108	3.22193577942153e-104
Masp1	969.28448762822	2.68359618645516	0.154202391814716	17.4030775714535	7.81870134130364e-68	3.30066477123133e-64
Ldb2	661.22556907657	-4.55908216101387	0.274284895630385	-16.6217033225099	4.85338864424606e-62	1.63908641293478e-58
Lypd1	1753.75084506602	-3.23491383996026	0.201851616625677	-16.0261973326636	8.385990801168e-58	2.36009734447538e-54
Prr16	151.017117522669	-3.12715791593516	0.195615065509507	-15.9862836115921	1.59252469535663e-57	3.84162457225602e-54
Plxnd1	885.064051999513	-3.12296106400768	0.198362984412585	-15.7436684735096	7.5912213219929e-56	1.60231704053965e-52
Cbln4	99.4195515450288	-3.92099164687641	0.25101371383871	-15.620627203643	5.26848169923119e-55	9.88484244146865e-52
Egfem1	405.518110904829	-2.0922058812249	0.134446012622174	-15.5616804129736	1.32572026532958e-54	2.139655230232e-51
Kcnk9	280.142646412235	-3.00509027411065	0.19314813961168	-15.5584738230061	1.39382965371029e-54	2.139655230232e-51
Aldh1a3	119.818414911719	-5.1228679034765	0.347979035332793	-14.7217716681615	4.67256532667054e-49	6.57507817551323e-46
Pcsk2	3119.95934890518	-1.89933026179969	0.133297129842096	-14.2488458982548	4.55750866968677e-46	5.91985318433314e-43
Crhr1	333.841684374259	-2.52683941471862	0.178013051605493	-14.1946862431106	9.88277699305035e-46	1.19200408789034e-42
Cpne8	719.704206029671	-2.73400267927063	0.194686186612574	-14.0431261551766	8.48840121913811e-45	9.55567619909108e-42
Lipg	339.807058655745	-2.35662691074711	0.169501749672545	-13.9032600861042	6.05207294220291e-44	6.38720648137739e-41
Sphkap	6785.69504300715	-1.52611788886732	0.109971562664208	-13.8773865888151	8.68533494769201e-44	8.24990394749357e-41
Gabrq	168.625798729595	2.52176141459739	0.181729004883548	13.8764938277923	8.79416505121901e-44	8.24990394749357e-41
Ntf3	58.5380332532408	-4.11482224508622	0.296925777703275	-13.8580835820804	1.13668675960534e-43	1.00094738020255e-40
Wnt7b	1148.77410252082	-2.72670003420012	0.196801712008282	-13.8550625722472	1.18553521284206e-43	1.00094738020255e-40
Spon1	266.255468942353	-3.02150017048319	0.218304624490938	-13.8407520112274	1.44684967346943e-43	1.16340493267642e-40
Rspo2	421.066102684317	-3.23898344183668	0.235278826498539	-13.7665742814167	4.04965524433344e-43	3.10829447526429e-40
Pex5l	741.427957998526	-1.51070233902605	0.110131807050581	-13.7172210234617	8.00761971412093e-43	5.87898549968026e-40
St3gal1	202.725920655877	-2.99495760291821	0.220011933008559	-13.6127052835889	3.36551456091392e-42	2.36791995314969e-39
Kcnip4	461.058857558265	-1.8721924842947	0.138507926652102	-13.516861666677	1.24369220683676e-41	8.4003946418582e-39
Slco3a1	1423.79600637345	-1.80210840848256	0.133767089854852	-13.4719863490937	2.28631424047019e-41	1.4848731640223e-38
Cdh12	633.285645562854	-2.69909902848631	0.204501336178529	-13.198442019616	8.95683813991113e-40	5.6016729196496e-37
Carhsp1	3524.48209890689	1.34031876137144	0.102949562642888	13.0191787800085	9.51891152798067e-39	5.74058357362434e-36
Gabrg1	815.115466385139	-1.90351161803748	0.150169352029767	-12.6757663418576	8.056741148545e-37	4.69124589773554e-34
Bmp3	260.416031691507	-2.15691694775487	0.172482084710412	-12.5051651096183	6.99543259063981e-36	3.93749582418479e-33
Kctd16	572.233021003323	-1.83051052047622	0.146689942050758	-12.4787732197946	9.74769243360189e-36	5.30966240109037e-33
Cntn5	1337.37386934011	-1.43201823446647	0.115130124446323	-12.4382583737596	1.6199766066856e-35	8.5484140564041e-33
Pcdh20	2932.60906612148	-2.25287048295172	0.181616055963123	-12.4045777285747	2.4681046844534e-35	1.2629216879297e-32
Chrna5	215.513565572957	2.48949166767882	0.203955528954232	12.2060513899452	2.88556811116876e-34	1.43310891544693e-31
Man1a	320.512028837013	-2.18193793245042	0.179653790368801	-12.1452373922713	6.08058510606185e-34	2.9336217171703e-31
Col6a1	237.816847221394	-1.93287640414078	0.159464712954948	-12.1210289619802	8.17265674383253e-34	3.83343004934322e-31
Bace2	207.211088975352	-2.71422092198885	0.224952511534475	-12.0657506932208	1.60194911089621e-33	7.310949374755e-31
Pcdh15	476.831399642363	-2.47148101048125	0.20579331569946	-12.0095300572862	3.16639256045171e-33	1.40704486252073e-30
Klf5	150.392383387135	-2.65306907303213	0.223427111115968	-11.874427681496	1.60730288339132e-32	6.95920935613997e-30
Smoc2	82.7461265836945	-2.69801502865976	0.227459350459921	-11.8615261285342	1.87525575621902e-32	7.91639217487861e-30
Tacr3	116.060109343032	-3.09316928925315	0.262892404551833	-11.7659134904496	5.84898027837485e-32	2.40892392635702e-29
Tshz2	99.9428342728896	-2.74368365585903	0.238230443335784	-11.5169313268323	1.0840320429428e-30	4.35832501836478e-28
Sertm1	2095.35236593408	-1.19682879396857	0.104029168949788	-11.5047424299452	1.24861552905665e-30	4.90328414503501e-28
Crym	656.505179566186	-2.47514521220559	0.216062856107608	-11.4556720058022	2.20248401788369e-30	8.45253298317818e-28
D430036J16Rik	48.7934650888307	-3.14522146962727	0.27552978662197	-11.4151776771147	3.51185578404882e-30	1.31780437265441e-27
Pcdha12	142.905500435063	-2.15620320572876	0.189461538963713	-11.3806908648711	5.21846791881419e-30	1.91563150602384e-27
Vcan	2548.685587674	-2.26693102549324	0.200335165288482	-11.3156919916125	1.09733052691022e-29	3.94245176115019e-27
Cdh8	1299.1036131394	-1.68277814072186	0.149177798456194	-11.280352426008	1.64087294684689e-29	5.77245428759511e-27
Hcrtr2	337.202834026357	-2.3192238368685	0.209283700986696	-11.0817222073874	1.53883719233999e-28	5.30302139384757e-26
Nr3c1	959.863155299365	-1.30550713534534	0.117981264136285	-11.0653767350492	1.84685167520846e-28	6.23718747751402e-26
Gabra5	5616.93342132986	-1.09050082978903	0.0988771827810666	-11.0288420353117	2.77413861183003e-28	9.18511854889448e-26
Csgalnact1	247.846995571253	-1.74603936694428	0.158949664911039	-10.9848571742602	4.51952896987452e-28	1.4676301189481e-25
Fam19a2	3742.16652831958	-1.93026636488825	0.178663204846237	-10.8039389898412	3.29747016849756e-27	1.05058643896698e-24
A930017M01Rik	763.934181725764	1.24643605511034	0.115911897660664	10.7533055731631	5.71751359544658e-27	1.78788767727242e-24
Zdhhc2	4594.50984739583	1.09081053689973	0.101848880007923	10.7100886805518	9.1274338550614e-27	2.80228814684667e-24
Mgat4c	164.336051672582	-1.69026388235665	0.158660480327012	-10.6533389970387	1.68220744193389e-26	5.07245622580279e-24
Cxcl12	43.3394934364664	-2.79868581470859	0.26411369211389	-10.5965192198432	3.09277881140544e-26	9.16222158059513e-24
2900055J20Rik	187.98259686789	-1.70477720023172	0.161183989412309	-10.5765914247903	3.82625633944503e-26	1.1139683542736e-23
Ndst3	465.325904684951	-1.59198186168055	0.151275778584509	-10.5237062838265	6.71779148347993e-26	1.92265469474648e-23
Fosl2	3056.58649624227	-2.17087289315831	0.207025938175355	-10.4859947129888	1.00185812305662e-25	2.819562710989e-23
Prim2	552.642297212164	1.32054585219129	0.126168581888582	10.4665189417557	1.23086378878132e-25	3.40727310448547e-23
Csrp2	1002.92974452253	1.34919112051615	0.12932514411722	10.4325506824353	1.76096580724922e-25	4.79607558406618e-23
Asic2	491.03196557958	-1.59468291062163	0.153178428093725	-10.410623287281	2.21764901443099e-25	5.9440033742352e-23
Myo5b	1258.14302405824	-1.35901640388129	0.131109342040556	-10.3655192126652	3.55820751691907e-25	9.38810814542116e-23
Inpp4b	402.779777985957	-1.42165643573277	0.137192227987108	-10.3625143828582	3.67180653276638e-25	9.53878847881433e-23
Glra3	127.367670200198	-2.17940623550448	0.210546024664894	-10.3512105677285	4.13227380500476e-25	1.05723599198955e-22
Grm7	1829.60239072706	-1.29707981675822	0.127086491054905	-10.2062761037115	1.85861649787997e-24	4.68426838555241e-22
Cthrc1	18.0054502021497	-4.45509625587865	0.437717673449808	-10.1780131945929	2.48584856028792e-24	6.17294688073851e-22
Sostdc1	113.429325544837	1.96549027735579	0.194364519540526	10.112392333756	4.86807808890615e-24	1.19133864651115e-21
Dpy19l1	1760.84893660261	-1.30423223058629	0.129002424320238	-10.1101373672532	4.98143813568176e-24	1.20166520513032e-21
Glis3	464.208353064836	-1.80623136606591	0.17904257570492	-10.0882784943999	6.22516438597969e-24	1.48053698340356e-21
Ccbe1	247.74946271034	-3.23038346068353	0.320414593134128	-10.0818861871602	6.64383090259856e-24	1.55816289751777e-21
Ahi1	12215.4740961778	0.967060944351219	0.0959604323355519	10.0777051625781	6.93263253587856e-24	1.60362236987459e-21
Ephb1	218.765613643112	-1.81293467849828	0.179927999247081	-10.075889723026	7.06187225277599e-24	1.61144290351859e-21
2610100L16Rik	325.520998220318	1.42660666156416	0.141997125974422	10.0467291276102	9.49673116126754e-24	2.13815736518885e-21
Lrrtm3	1027.21089214414	-1.62549092833994	0.162034733075905	-10.0317437964271	1.10546743993465e-23	2.45617410404429e-21
Muc2	27.5252159943847	-3.14032318355465	0.313490372706998	-10.017287473417	1.27966795237085e-23	2.80629520048496e-21
9130227L01Rik	17.6827520554541	-3.10747463022559	0.313679478092751	-9.90652831074511	3.89961577895437e-23	8.44216821069532e-21
Cdo1	1252.14743983004	0.973064510582794	0.0992162316414736	9.80751329176707	1.04512277732173e-22	2.23391686301959e-20
Chrm3	666.829217416671	-1.70625710088373	0.174974833130296	-9.75144293815759	1.81864656186286e-22	3.83870823045203e-20
Lhfpl3	1019.76258544678	-1.57263780415137	0.16131103365992	-9.74910251624102	1.86106250268626e-22	3.87974091609384e-20
Npy1r	963.488187364473	-1.1957663077538	0.122962245340603	-9.72466226882537	2.36689528642728e-22	4.87407241544038e-20
Npc1l1	40.4273776037674	-2.48592160596833	0.255781560102011	-9.71892424526967	2.50412986778842e-22	5.09454662017774e-20
Ptprk	3476.61525597525	-1.9555050808823	0.201774524044448	-9.691536085356	3.27564483694779e-22	6.58482603770242e-20
Plxdc2	2500.06118228	-1.48970460584971	0.15416183032454	-9.66325193930035	4.31930691679329e-22	8.58068430552605e-20
Prkg2	225.885556954617	-1.80203716201627	0.186855654760191	-9.64400656929002	5.21133236657777e-22	1.02323905048875e-19
Gabra4	3097.54819339377	-0.953501672395045	0.0989509760526315	-9.63610173878307	5.62849327306142e-22	1.09244525757374e-19
Lypd6b	303.80989499502	-1.19460484208414	0.123987295261343	-9.63489718495861	5.69489815215105e-22	1.09277329769571e-19
Klf14	49.1912128550715	-3.01776631496038	0.316714469733688	-9.52834999139094	1.59802862397688e-21	3.03194509488467e-19
Atp10a	77.1097231887507	-2.37297862118222	0.249987968366283	-9.49237131966819	2.25837299059302e-21	4.23720959101707e-19
Chst2	4390.55601946871	-1.07313211440335	0.115520939201013	-9.2895030271182	1.55010395046292e-20	2.84513646836679e-18
Rgs7	2605.61429599032	-0.867363797273092	0.0933703203235026	-9.28950221299353	1.55011580652461e-20	2.84513646836679e-18
Layn	238.715623229928	2.09861165903246	0.226976355508393	9.2459483470509	2.33163766169332e-20	4.23355199519929e-18
Nap1l5	7810.24786880943	1.02223336786825	0.11071013920278	9.23342139418598	2.62122484610921e-20	4.70872369695746e-18
C630043F03Rik	765.520780735257	-1.14080622833837	0.124445997388207	-9.1670785102043	4.86011804258197e-20	8.63873192284622e-18
Adcy8	1101.52247403406	-1.67113509892535	0.182423775726059	-9.16073078892333	5.15470419412145e-20	9.06690989811822e-18
Ly6g6e	17.1914090906488	3.68471010231595	0.402635454326033	9.15147949025937	5.61590759316208e-20	9.77631088846752e-18
Gpc5	163.087498557231	-1.87317872571584	0.204722525789583	-9.14984180901092	5.70169789422612e-20	9.82437455529614e-18
Slc24a4	196.92978249879	-2.19445021977547	0.239963894028786	-9.14491835806027	5.967492143193e-20	1.01784921545411e-17
Pcdhb1	52.9094239540533	2.07531276465814	0.227016783196871	9.1416710933588	6.14946191592307e-20	1.03839813912277e-17
Lama2	441.167504361957	1.4507809604645	0.159170063683991	9.11465967209014	7.89177699432457e-20	1.31941134976401e-17
Cartpt	110.030953025853	-2.18083849631472	0.241028578263321	-9.04804945549726	1.45544854547805e-19	2.40948079793553e-17
Cdh20	235.241884307627	-1.56766951141044	0.174152949355972	-9.00168224085649	2.22285122124968e-19	3.63805549886535e-17
1600029O15Rik	129.182884931141	1.94776612468197	0.216399071225774	9.0008063049856	2.24065955159302e-19	3.63805549886535e-17
Fbxw7	4861.64078464781	-1.17067933468389	0.130783138678866	-8.95130172367597	3.51314675801888e-19	5.64980915770541e-17
Tktl2	76.7200207090007	-1.66077907150218	0.185589903814313	-8.94864988541524	3.59856572941951e-19	5.73258310443187e-17
Adamts15	472.038693333872	-1.66304103471668	0.186634020260601	-8.91070680680048	5.07082487312702e-19	8.00242512220774e-17
Cpne4	676.248134315789	-1.69684968372497	0.191586181764612	-8.8568479631259	8.23086721807163e-19	1.2869113318922e-16
Klhl14	113.793213540464	2.17004737031877	0.246130827057638	8.81664193088094	1.1794366570927e-18	1.82715297171261e-16
Kcng3	57.6087477557038	-2.20677392255506	0.251665486923626	-8.76867920798674	1.80774273686754e-18	2.77504944134047e-16
Rhou	973.376858583731	-1.13337735388984	0.12940161369067	-8.75860293828431	1.97685143120958e-18	3.00730750156802e-16
Chsy3	208.647820252134	-1.28119677814137	0.146719721005291	-8.73227381679088	2.49603055615274e-18	3.76321178314242e-16
Sla	1975.1829843502	2.19414008224247	0.251409584406773	8.72735256859746	2.6070337774344e-18	3.89578516511126e-16
Calb1	1111.71366578374	-1.73099465718733	0.198772324958654	-8.70842888992415	3.0811553395744e-18	4.56389377754854e-16
Sfrp1	1229.25174052418	-1.38087836312757	0.158872829506002	-8.69172134355047	3.56988811297579e-18	5.24183745006166e-16
Nxn	527.637444067966	1.0453471651893	0.120632677274608	8.66553896345742	4.49381978813018e-18	6.54160697779019e-16
Nfib	11456.8374728387	1.66837188174751	0.192612171505425	8.66181959690181	4.64292721726517e-18	6.7008947855333e-16
Myc	188.660579792186	-1.45697264903199	0.169227262660049	-8.60956223087305	7.33401025144697e-18	1.04950929750791e-15
Cemip	914.983087829743	-1.42963853709282	0.166573431749541	-8.58263242869621	9.27262859492871e-18	1.31577820549551e-15
Tnr	1346.29712973605	-1.38926128982148	0.161920761156711	-8.57988364121459	9.49691601550397e-18	1.336374365315e-15
Id2	1592.07079682533	-0.890742914791498	0.103894190057989	-8.57355848574713	1.00335540351654e-17	1.40021978047771e-15
Unc5d	2833.79241532021	-1.31274103202619	0.153316968856791	-8.56226836347377	1.10668230387909e-17	1.53175716256576e-15
Zim1	270.48151314546	-1.34161528424927	0.156800418449922	-8.55619709125804	1.16651797199244e-17	1.60144898171254e-15
Nol4	7028.76300815732	0.835903207016248	0.0977748137984721	8.54926922938626	1.23870269895164e-17	1.68683336891108e-15
Vegfa	805.808483819502	-0.970034364967965	0.114519274562154	-8.4704899561819	2.4436298712804e-17	3.30105072051526e-15
Tcp11	70.403437262409	2.04680067907598	0.242380302533609	8.44458339923133	3.05131659780226e-17	4.08924857702294e-15
Kcnd2	2257.36525418549	-1.21367735151694	0.143954045974584	-8.431005487204	3.42707681253212e-17	4.55666291782814e-15
Gucy2f	52.6597704044511	3.23349806035232	0.384077219553167	8.4188748921744	3.80117056120139e-17	5.01457547628489e-15
Ppp2r1b	901.811362847263	1.21967031791318	0.147647698373113	8.26067951855921	1.44845500945941e-16	1.89601637904896e-14
Robo3	18.8965279824214	-2.73162457458166	0.331066672500291	-8.25098024501172	1.57100522185582e-16	2.04061493663518e-14
Lrrn1	1248.75548406336	-1.49593479580887	0.181467831424617	-8.24352605122903	1.67208497517227e-16	2.15533029700449e-14
Brinp1	5954.42965831453	-1.22038351371233	0.148067059889689	-8.24209999591752	1.69214049955382e-16	2.16465791480802e-14
Calb2	1048.08347331237	-1.8531406029174	0.225731132767553	-8.20950384733005	2.22104349309064e-16	2.81989025746832e-14
Tmem163	226.491830314958	-1.67486209595301	0.204143321246966	-8.2043443092944	2.31852760086243e-16	2.92169082598231e-14
Grid2	185.229597975092	-1.38221240035954	0.168772947023558	-8.18977463352939	2.61715776294768e-16	3.27357970260256e-14
Slc16a11	24.263215754928	-2.27602512908411	0.278313536030707	-8.17791747230358	2.88791442348694e-16	3.5856855113971e-14
Themis	36.0595801129695	2.35650176016747	0.288543542111685	8.16688442555873	3.16455806141573e-16	3.90049105292453e-14
Lancl2	7579.0159308372	0.710638452219431	0.0870896730455025	8.15984751542399	3.35447802760073e-16	4.10461709957e-14
Cacna2d3	1781.30083709057	-1.33367447287857	0.165329858899333	-8.06674899354163	7.21947616029192e-16	8.74618522910548e-14
Ankrd6	1087.33053678369	0.693102955884038	0.085926711976806	8.06621061063206	7.25136759489973e-16	8.74618522910548e-14
Nrn1	3521.21166392713	1.13186321314	0.140377008592667	8.06302416960841	7.44298008078774e-16	8.88013925505562e-14
E330009J07Rik	654.213482912013	0.856837261587897	0.106272800163958	8.06262054134236	7.4676049639814e-16	8.88013925505562e-14
Lmcd1	65.3828032827426	1.7426857207296	0.216220608683049	8.05975772311396	7.64458083581638e-16	9.02702041913254e-14
Myo15	44.3904347683977	-2.46992788546535	0.307412688791966	-8.03456713244785	9.39098506758726e-16	1.10122342952277e-13
Grm5	11388.4101089237	-0.975572969979536	0.121474621612641	-8.03108465808148	9.66146539533682e-16	1.12512761838384e-13
L3mbtl4	57.924002866686	-1.73803102810836	0.216657212263111	-8.02203171523171	1.04010276268397e-15	1.20295720895079e-13
Wscd1	2385.67433680522	-1.15803623809047	0.144569370334268	-8.01024612207207	1.14479106723157e-15	1.31503006539267e-13
Cpne7	1269.85973503359	-0.865699065755589	0.108834886324069	-7.95424238490831	1.80230972192591e-15	2.05633797057033e-13
Arap2	1493.6449102777	-0.912684426422227	0.115027905802417	-7.93446094715432	2.11411529837121e-15	2.38185202307495e-13
Psmb9	63.4277474338568	1.81462736456493	0.228704922964101	7.93436075204104	2.11582259541183e-15	2.38185202307495e-13
Rorb	737.584400589867	-2.01655212727307	0.254312554169555	-7.92942422311013	2.20164251396441e-15	2.46204870800021e-13
Neurod1	635.463244989381	1.08556030841721	0.137422387837254	7.89944291830245	2.80152697359151e-15	3.11227529447804e-13
Trim17	109.082180117574	-1.32556768756758	0.168508710680867	-7.86646388908657	3.64805964907009e-15	4.02621798916324e-13
Myo1h	23.6894129202611	2.19152993903288	0.279500735263359	7.84087360975245	4.4742261319141e-15	4.90595990022737e-13
Cnksr2	2659.95443519232	-1.02174307621722	0.130562474327871	-7.82570245759435	5.04830045203924e-15	5.49971622149255e-13
Csmd2	1059.1955804784	-1.16252540810261	0.148946673477913	-7.80497731810706	5.95122472649519e-15	6.44181927766652e-13
Aldh1b1	400.484637760983	1.03994394998502	0.133921205051013	7.76534193811117	8.14252510229013e-15	8.75762285842492e-13
Cldn12	1170.26220238629	-0.742354462602342	0.0958017373836958	-7.74886221143502	9.2719560225536e-15	9.90925629093924e-13
Tex36	45.6447135981256	1.73485202761308	0.224074396508761	7.74230369307388	9.76314446878193e-15	1.03685822326951e-12
Vmn2r-ps54	13.7676383974918	-2.45293893919483	0.31744970406687	-7.72701598952546	1.1009682231259e-14	1.16193433848149e-12
Stag1	2864.64495758009	0.99529211138997	0.128843817184082	7.72479528426242	1.12033245962226e-14	1.17502695112929e-12
Vwc2l	129.954502165272	-1.33089346622222	0.173049257600231	-7.69083603523324	1.46176667742091e-14	1.52366617993392e-12
Stx16	1200.09885159462	0.939644870474704	0.122605340759143	7.66397992662186	1.80258079812017e-14	1.86738523662928e-12
Rnf128	781.724253123557	1.00858111146718	0.131658790944976	7.66056792887222	1.85112646989858e-14	1.90598302260411e-12
Cnih3	1994.2384643456	0.554780090780428	0.0724621800050809	7.65613304404488	1.91615218140947e-14	1.96097852941092e-12
Hpgd	21.6484022722791	-2.05424440261162	0.268469037786769	-7.65169950153879	1.98340297919061e-14	2.01757486184413e-12
Galnt3	89.6803391381931	-1.5123202520686	0.198671458066264	-7.61216667350472	2.6953865039523e-14	2.72540697639153e-12
Zbbx	105.334276209896	1.66878588801457	0.219302768795828	7.60950669787583	2.75144054050087e-14	2.76552529564867e-12
Fam189a1	312.467473336291	-1.27476029847448	0.167572009375336	-7.60723884153713	2.80013567316792e-14	2.79781603414873e-12
Dnajb5	1625.52786737674	-0.493390944384431	0.0650642177006153	-7.58313804147629	3.37295638661471e-14	3.35033773790447e-12
Alcam	7131.31850116379	-1.04515557416478	0.137864960697452	-7.5810094811429	3.428765389787e-14	3.38585569426569e-12
Syt10	105.947928334667	-1.61997403939883	0.213855126613962	-7.57510032632093	3.58850208353675e-14	3.522991057128e-12
Fam69a	892.103456723123	0.658146638436266	0.0869226004071419	7.57164000333094	3.68541590773534e-14	3.5972215617352e-12
Dgkk	224.399379800774	-1.4220751331288	0.18824540311867	-7.55436844443065	4.20897142423044e-14	4.08463744077904e-12
Ghsr	108.187784432227	1.67575677042142	0.222042785089129	7.54699942062413	4.45400567468417e-14	4.29773370415525e-12
Slc9a9	662.323694265635	0.985795897881451	0.130724597783928	7.54101305028191	4.66334440735424e-14	4.47416100355589e-12
Ccdc42	21.352857686114	2.12984055671194	0.282650937827144	7.53523258434913	4.87465185136729e-14	4.65047294701628e-12
Rasa3	1814.19285894615	-0.951296176451971	0.126520539294281	-7.51890706250707	5.52360304820003e-14	5.2399753411183e-12
Efna5	257.773178808797	-1.33800375697907	0.178477067850208	-7.49678248917686	6.54033749443883e-14	6.14672996557161e-12
Mpped2	1562.4110523762	1.05946685149549	0.141327369770253	7.49654403968453	6.55224087292958e-14	6.14672996557161e-12
Trpc4	734.57606978152	-1.17314653162142	0.156578586077463	-7.49238169158736	6.76348877014444e-14	6.30984924710824e-12
Tcerg1l	287.861250698318	-1.0368123395233	0.138543327413535	-7.48366853084549	7.22761136274927e-14	6.70579370721891e-12
C730002L08Rik	54.9388882997942	1.9540112535072	0.262147068801598	7.4538741266112	9.06384779836601e-14	8.36350458596768e-12
Col12a1	181.609538005331	-1.68466049478511	0.226175471122519	-7.44846683163324	9.44311636696011e-14	8.66611211807002e-12
Flrt3	2572.23463040929	-1.23301171386739	0.165617721885239	-7.44492618200472	9.69986414155315e-14	8.85361653482522e-12
Cmbl	55.9709734350355	-1.58690026252058	0.213257454450344	-7.44124169825953	9.97432588122497e-14	9.05518638872929e-12
Hey2	57.6653184976086	-1.7130580792835	0.23044774770523	-7.43360738537007	1.05675325661132e-13	9.54242539633086e-12
Fgf10	96.6989565731934	-1.51817608666907	0.204340667923403	-7.42963259392963	1.08899735394373e-13	9.78128155249671e-12
AU022754	39.1572452076004	-1.67777663375039	0.22612871434285	-7.41956473164479	1.1750585979391e-13	1.04984335898411e-11
Rtn4rl1	486.398494492578	-1.31371061719408	0.177089998209339	-7.41832192940191	1.18613511144891e-13	1.05416197325927e-11
Khdrbs2	349.197979713691	-1.17026650900728	0.157829682304831	-7.41474285392679	1.21861015300949e-13	1.0773534577863e-11
B930025P03Rik	48.4773216024777	1.97073586388064	0.265979034592749	7.40936542948999	1.26905174508637e-13	1.11610457122544e-11
Nxph3	66.6661054130856	-1.89398506340791	0.256055609308701	-7.39677239846957	1.39534406916778e-13	1.22081761409156e-11
Gm3279	531.553621034028	1.18183782936122	0.159893797405872	7.3913925901782	1.4529891176734e-13	1.26469970314603e-11
Pou3f2	1624.54955335785	0.967771272423682	0.131411831493486	7.36441507149722	1.77925284081411e-13	1.53671362325023e-11
Ica1l	2088.77690682205	0.656416245741726	0.0891375537300736	7.36408189672207	1.78370170648493e-13	1.53671362325023e-11
Htr1b	20.3631614197025	-2.22600763151673	0.303417801463952	-7.33644374448873	2.1934394538743e-13	1.88012277249347e-11
Atf3	845.384718767184	-1.2632054228517	0.172232867039931	-7.33428784274279	2.22903563995955e-13	1.90098463718975e-11
Gm4841	83.0958770858786	-1.70197222006215	0.232131779280594	-7.33192251977211	2.26874257800688e-13	1.92512498352886e-11
Thsd4	108.72566937226	-1.6178032207534	0.221075839030951	-7.3178653436068	2.51946484270427e-13	2.12718416669522e-11
Igfbpl1	74.2012655654974	1.56539089149534	0.214272408770613	7.30561111660041	2.76009377482482e-13	2.31875340704935e-11
Etv1	291.398292543226	-1.12942003075277	0.155044375928498	-7.28449531941506	3.22876685800498e-13	2.69905728536001e-11
Rad51d	393.699690030459	0.828790300191643	0.113891889872953	7.27699137415457	3.41347074907171e-13	2.83940231866133e-11
Mt2	501.430631012084	-1.21217710966268	0.166740113688517	-7.26985896103634	3.59863025673246e-13	2.9787485546659e-11
Fgf18	96.4377928253443	-1.16867896530013	0.161021904905141	-7.25788808664641	3.93180636119912e-13	3.23865766903456e-11
Cdh7	107.251433695643	-1.68057862786493	0.231957657303352	-7.24519572840434	4.31815152050843e-13	3.53962653278181e-11
Raver2	246.719264491951	-0.948407072332292	0.131071883798846	-7.23577814588978	4.62867445583801e-13	3.77583559716332e-11
Htr1a	387.276298167958	-2.55758035549646	0.353606489063808	-7.23284338550402	4.72984756087962e-13	3.83762738397276e-11
Fzd8	60.0155296346482	-1.47190460619807	0.203531879682653	-7.2318135541865	4.76586216747982e-13	3.83762738397276e-11
Diap3	171.177598674304	1.53802929525702	0.212681106655449	7.23162164916082	4.77260304769797e-13	3.83762738397276e-11
Itga4	119.260704436478	-1.56097275142819	0.215889373383394	-7.23042883938567	4.81471225993272e-13	3.85313892043715e-11
Syndig1	473.187872944279	-1.03237428014125	0.142859819402535	-7.22648456689098	4.9565692514901e-13	3.94795416889914e-11
Sh3bp4	523.682035108963	-1.23743240961092	0.171485873026702	-7.21594372626974	5.35612050316826e-13	4.24617139983564e-11
Rspo3	958.7990618972	1.20783661388342	0.16741663618542	7.21455550298896	5.41104339143015e-13	4.26966722933128e-11
Ddn	6553.91134932709	-1.33465909784193	0.185640440798199	-7.18948464086431	6.50363353810477e-13	5.10792353136917e-11
Zfp599	74.1613529994719	-1.66524110739605	0.23188933592466	-7.18118882334927	6.91078266712636e-13	5.40256833875443e-11
Pcdhb22	311.812004219823	-1.18959914694353	0.165926224951506	-7.16944622401434	7.53017402093734e-13	5.85627072474068e-11
Trhde	420.845994870003	-1.38500397823988	0.193196276261537	-7.16889582470497	7.56050585096215e-13	5.85627072474068e-11
Pou3f1	221.161958817895	-1.51780097124161	0.211805029234361	-7.16602894996495	7.72044542240186e-13	5.93681101293827e-11
Bcl2l11	302.863806792229	-1.07180575784849	0.149572911975862	-7.16577449546114	7.73480056168671e-13	5.93681101293827e-11
Tcfl5	259.823084313644	0.916006414691279	0.128143736038236	7.14827304877359	8.7876385515284e-13	6.7143920624936e-11
Cacng5	414.575565793936	1.06683076076901	0.149302186910486	7.14544631157099	8.97039474698957e-13	6.82315701340837e-11
Dnah10	50.4474729748812	-1.79596029797356	0.251994518301026	-7.12698161087836	1.02593792454281e-12	7.76860439185198e-11
Mturn	18757.8815504992	0.763973639267241	0.107330333482657	7.11796576492224	1.09531567097667e-12	8.25691983040717e-11
Siglec1	7.62566134496363	-3.15404183410321	0.443240631252332	-7.11586802227896	1.11210674885287e-12	8.34623758272422e-11
Gabrr2	19.3560623860994	-1.96873775938506	0.277236301298994	-7.10129860397256	1.23590016048751e-12	9.21061644713006e-11
Epha7	1167.97460059909	-1.16130220716068	0.163557780196414	-7.10025659290611	1.24525471474964e-12	9.21061644713006e-11
Unc5c	3507.11283535818	-1.19841897138118	0.168793929443992	-7.09989378959764	1.24852802483695e-12	9.21061644713006e-11
Tmc3	10.4784528356804	2.47430933378982	0.348502595681648	7.0998304301012	1.24910053677175e-12	9.21061644713006e-11
Edil3	4202.88702728392	-1.14833972092301	0.161807961812784	-7.09692964460965	1.27558952374582e-12	9.36504552085736e-11
Pcdhgc4	1883.00055575251	1.33627196084817	0.188485524239563	7.08952035568408	1.34577606570829e-12	9.83756478162345e-11
Pabpc1l	13.8533295363295	-2.16066739603296	0.305082771516733	-7.08223340600684	1.418494730141e-12	1.03244405229142e-10
Kcna3	799.358993256964	0.889168582140403	0.125635329677503	7.07737691637245	1.4690857130612e-12	1.06467731119104e-10
Cdh10	1380.85566671824	-1.11335024510988	0.157464272232348	-7.07049433707137	1.54382735626256e-12	1.11406276657477e-10
Npr3	236.869686833125	-1.4105597292528	0.199601020653695	-7.06689637474401	1.584371721917e-12	1.13845535728896e-10
Rprm	227.541250641479	-1.29745616148964	0.18367971763156	-7.06368769627676	1.62140934124765e-12	1.16013212441982e-10
Fam26e	40.4696643471226	-1.64078389714556	0.232483953999878	-7.05762212366029	1.69375892675932e-12	1.20678536866067e-10
Pcdha9	214.478200094672	-1.10608056943337	0.156823438877928	-7.05303095855683	1.75061881437156e-12	1.24205669325538e-10
Chrm2	148.925596167553	-1.27414148718274	0.180821244275504	-7.04641477436925	1.83586480919816e-12	1.29708841707616e-10
Ankrd33b	502.482580470812	-1.06760121046891	0.151571753683508	-7.04353670472229	1.87420599901208e-12	1.31866010413825e-10
Sstr1	1024.1875103821	-1.48690327580394	0.211196850718366	-7.04036670407905	1.91734553974336e-12	1.34341480431977e-10
Cap2	978.751704103463	-0.966707276594876	0.137341396627301	-7.03871738845208	1.9401742641736e-12	1.35379267044775e-10
Laptm5	64.0812322661407	2.04519569196633	0.290605625376173	7.03770165948761	1.95436574360421e-12	1.3580831253704e-10
Rin1	107.764649104401	-1.34326611716711	0.191335039672	-7.0204920095652	2.21088306148468e-12	1.53003981050124e-10
Bmp2	36.5628611532308	-1.85067212023346	0.263886077187495	-7.01314802189632	2.33014694736521e-12	1.6059943409473e-10
Gria3	1311.58275565076	-1.1745390005809	0.167601281130395	-7.0079356951162	2.41859912555398e-12	1.66018149732132e-10
Car10	235.097758387885	-1.34286487216655	0.191887262935911	-6.99819702267084	2.59277319598452e-12	1.77253312499574e-10
Ccdc147	68.6329709188002	1.46446308936257	0.2097605428768	6.98159467590006	2.91848124103323e-12	1.98715621919706e-10
Kcnk10	1407.09000164394	0.695789217375206	0.0997625848873082	6.97445057344063	3.07068474912207e-12	2.08239287846086e-10
Frmpd3	82.6875492371446	1.11911834519609	0.160893730373245	6.95563675849852	3.50973118110584e-12	2.37061282896613e-10
Fat3	3754.73221619483	-1.42361749359099	0.204732615957087	-6.95354517371766	3.56218812365991e-12	2.39645851219607e-10
Lpl	264.290937952006	-1.57687963757872	0.227951188574409	-6.91761972131149	4.5929519644745e-12	3.0760338779815e-10
Epha6	389.983647701398	-1.29822352162299	0.187682325100373	-6.91713255858644	4.60876803937770e-12	3.0760338779815e-10
Gpr35	30.0190842312784	-1.66322170541564	0.240695127439854	-6.91007634058256	4.84392961167288e-12	3.21081975052714e-10
Tubb2b	51669.6864826311	0.703511790735059	0.101811630729039	6.90993539438908	4.84874473756024e-12	3.21081975052714e-10
Adam33	8.15242184765992	-3.08005046199925	0.445791400205204	-6.90917424737547	4.8748288973429e-12	3.21548284220829e-10
Jakmip3	654.667393340201	0.626971714023698	0.0908497918666797	6.90119042808339	5.15685484712948e-12	3.38827435597776e-10
Islr2	3782.38827369246	1.22823851080233	0.177999648805449	6.90022996699715	5.19184228672287e-12	3.3980406532404e-10
Kitl	8217.60996414773	1.22600457633164	0.177807445522003	6.89512507607524	5.38174308611528e-12	3.50873026070049e-10
Gpr132	8.82710536115988	-2.83616695860124	0.41193932974446	-6.88491424297993	5.78223573459029e-12	3.75533971593429e-10
Gng4	7840.80089126105	0.972588570035969	0.14137977921305	6.87926219328964	6.01633391699761e-12	3.89240668668282e-10
Nnat	41227.9318307415	-1.02402410057223	0.148979061930839	-6.87361087726285	6.25968132545462e-12	4.03438850616896e-10
Iqcf5	39.1782232782876	1.51477562515898	0.220630919365535	6.86565432222736	6.61871697930835e-12	4.24956862785555e-10
Fst	257.669962567562	-2.28744406378488	0.333291994538552	-6.86318333853737	6.73427062459768e-12	4.30738233965744e-10
Sema3d	126.757193788136	-1.46818344885013	0.214162589788181	-6.8554617793063	7.10825255978929e-12	4.52943217828686e-10
Tapbp	387.576590771423	0.974168122778496	0.14217198918994	6.85203976063822	7.28043128154649e-12	4.62170536166143e-10
Gabrg3	330.000771143364	-0.838030250588751	0.122718023697731	-6.82890927784918	8.55626593141832e-12	5.41127739767527e-10
Enc1	11552.4631907305	-1.22460599275965	0.179345104480158	-6.82820975966552	8.59808091160519e-12	5.41743262214049e-10
Ly86	50.5088963205353	2.89580071589554	0.424154461570043	6.82723153536213	8.65689201531773e-12	5.43421109928086e-10
Neto2	4401.37108856916	-0.9193951721175	0.134743554875902	-6.82329609727351	8.89749983536334e-12	5.56456230444242e-10
Gpr151	30.111232538591	1.97888342046733	0.290066486409541	6.82217185777666	8.9674294689716e-12	5.58760199310164e-10
Grin2a	1238.5916846789	-0.996940360071552	0.146149673705937	-6.82136562328193	9.0179099112454e-12	5.59839804269448e-10
Gm9962	56.5749327677017	-1.36054760930587	0.199508722594259	-6.81948935171528	9.13646852656961e-12	5.65122371940126e-10
Htr2c	356.593815606493	-1.23217374273422	0.180740000201103	-6.81738265665168	9.27140765861443e-12	5.71375874902786e-10
Grem1	23.463345817597	-1.80889143360019	0.265373471537588	-6.81639887785081	9.33508810348303e-12	5.7320835532878e-10
Fezf2	462.839558414244	1.22404581879513	0.180055253285239	6.79816776495841	1.05958028466772e-11	6.48263503148521e-10
Sema6a	1167.90763437205	-1.18116313398311	0.173789961613722	-6.79649804289876	1.07192761409783e-11	6.53450169373858e-10
Esr2	23.7260447666455	-2.28277901824157	0.33610679447877	-6.79182645439132	1.1072269648106e-11	6.7254081035222e-10
9130019P16Rik	24.649267846611	1.71890307788416	0.253261177139984	6.7870768717705	1.14428246745799e-11	6.92557481917405e-10
Erich5	14.0541689882302	2.73839970322428	0.40361129271112	6.78474500757901	1.16291723886563e-11	7.01097572559816e-10
Fam84b	328.951494465966	-1.32418875055561	0.195184961324299	-6.78427652197794	1.16669677774078e-11	7.01097572559816e-10
Tshz3	437.215740636248	-1.52682677130925	0.225348104668553	-6.77541430204147	1.24050256898305e-11	7.428058999946e-10
Pcdhb17	672.504910703287	-1.10213131062993	0.163042461950005	-6.75978084143433	1.38200627832104e-11	8.24613357446259e-10
Dcn	58.8531836473464	-1.60670069703167	0.237765449819039	-6.75750281739638	1.40390313419356e-11	8.34729166337765e-10
Clstn2	2019.26816060058	-1.24382892599324	0.184124821676372	-6.75535712495875	1.42483855652684e-11	8.44204346158324e-10
Lingo2	719.789847411926	-1.44305649175604	0.213643374337319	-6.7545108582568	1.43317935263154e-11	8.46177152046722e-10
Atp6v1c2	40.9931671684634	-2.10782180274708	0.312108426662859	-6.75349212863117	1.44328338813531e-11	8.4917363386944e-10
Ldlrad4	260.562950222873	-1.02699455915376	0.152170098888451	-6.74899054844276	1.48877286368811e-11	8.72896478341575e-10
Rgs6	425.960125904698	-1.12935824226161	0.167569904579609	-6.73962454711002	1.5879642686184e-11	9.27832686501393e-10
B3galt2	5446.82891916099	-1.08708114513401	0.161381657523585	-6.73608861016401	1.62707083829265e-11	9.47404075014128e-10
Fmn1	171.007610959976	-1.08457941955964	0.161298869883786	-6.72403607254696	1.76758642466981e-11	1.02568606072077e-09
Cd52	66.9013913059504	2.07653534592955	0.309934292611757	6.69992122662835	2.08531921165136e-11	1.20591439068304e-09
Tusc3	10935.1501249411	0.561482748982913	0.0839079796777068	6.69164900811086	2.20669643097872e-11	1.2717500318603e-09
Myoc	10.6288559899145	-2.42202157401175	0.362217997520124	-6.68664061585506	2.2835172887611e-11	1.31154669857211e-09
Entpd1	59.933760555336	1.37456149233251	0.205750784745359	6.68071081251862	2.37786048666126e-11	1.36110346365295e-09
Dnah7a	93.841998378825	-1.45481612299898	0.217849350368302	-6.67808336604828	2.42087325149513e-11	1.38104276097117e-09
Trpc6	209.597488274575	-1.45794835490245	0.219024739431389	-6.65654646451096	2.80336536480548e-11	1.59385951347156e-09
Crabp2	9.63002576694838	-2.24901386000448	0.338667227538873	-6.64077795878945	3.12031797734575e-11	1.76811038139129e-09
Mocos	31.2487306324661	-1.57308529185518	0.237415467636617	-6.62587533792409	3.45196407653315e-11	1.9494938259645e-09
Gm13749	16.9052585695668	2.41689975505944	0.365265611089147	6.6168280880665	3.66987848308116e-11	2.06031318074029e-09
Etv6	340.922434145927	-1.41734480730445	0.214206599175589	-6.61671868541559	3.67259426390399e-11	2.06031318074029e-09
Ostn	27.6717260144857	-2.62877651324352	0.3975933276737	-6.61172190344433	3.79875139339494e-11	2.12403033208169e-09
Pcdhb12	219.890497866768	-0.937222122548624	0.141955200978172	-6.60223870693359	4.0499469021057e-11	2.25701001283686e-09
Pid1	639.028866240217	-0.818942520827294	0.124085319480443	-6.5998340839697	4.11618178789496e-11	2.2863765023156e-09
2610001J05Rik	770.122775514228	-1.0061841584034	0.15269715826658	-6.58940984773795	4.41578264272481e-11	2.44475100672299e-09
1700019D03Rik	56.025011028291	-1.49227371271188	0.226984482264905	-6.57434243002703	4.88686496450881e-11	2.69671901276784e-09
Tcf24	12.5201953468415	-2.17256393352131	0.331048841366443	-6.56266889367077	5.28531219624668e-11	2.90709386794207e-09
AF251705	17.5850489843772	2.24706650002338	0.342605757828309	6.55875287755513	5.42596334632931e-11	2.97476678786093e-09
Cpxm2	45.8739716586966	1.32297033459958	0.201827667955381	6.55495030984578	5.56604074399097e-11	3.04168815543791e-09
Onecut2	147.6872635044	-1.59647313244335	0.243598653490375	-6.55370261521757	5.61276891677073e-11	3.05259644473094e-09
Prss12	952.527745517347	1.07183375541977	0.163552516421963	6.55345315907247	5.62215737481536e-11	3.05259644473094e-09
Hck	44.5408192214351	2.07608005500386	0.317278121679897	6.54340754418113	6.01326662842411e-11	3.25448782972979e-09
Pkia	38124.9678590311	0.684265016858218	0.10491927606253	6.52182365850871	6.94576479038852e-11	3.74716243611823e-09
Syce1	14.4593035465762	-2.23863760045403	0.34355664366803	-6.51606552140253	7.217545823636e-11	3.88138467445597e-09
Samd5	154.740771475321	-1.17046970180071	0.180268210350115	-6.49293460853377	8.41802344417126e-11	4.51259504375479e-09
Kcnq5	2222.85887625702	-1.04193248316684	0.160713407062216	-6.48317089540316	8.98146657780945e-11	4.79940014661046e-09
Itgbl1	358.869281479376	1.41323743117575	0.218098269118522	6.47981956430726	9.18323714854185e-11	4.89173951073431e-09
Pcdhga12	151.773632178271	-1.30274701891705	0.201091666130898	-6.47837398725933	9.27163160927782e-11	4.92329469667501e-09
Adra1a	188.223766502138	-1.22500455886315	0.189150582064197	-6.47634570031294	9.3970616283184e-11	4.97171626735635e-09
CK137956	34.0717148562747	-1.7107415155718	0.264168413170203	-6.47595030398118	9.42170558778889e-11	4.97171626735635e-09
Trpm3	432.830622855381	1.26834611674722	0.195912205509114	6.4740535866624	9.54080402730078e-11	5.01887902819318e-09
Cd72	21.3276922142071	2.56314607272666	0.395949043997939	6.47342407206318	9.58065679661903e-11	5.02419163564314e-09
Glt28d2	11.1357694908294	-2.79215620315645	0.431763195980702	-6.4668694070007	1.00054045297277e-10	5.23068919160933e-09
Zcchc12	12232.9216737711	0.589782188617306	0.0913795686032463	6.45420193629973	1.08790667239522e-10	5.6698740956993e-09
Pde6b	10.236685621913	-2.33238871184367	0.361423703389536	-6.45333631958795	1.09414168002951e-10	5.68482351045489e-09
Zkscan16	364.980859427936	0.932897958149877	0.144794773468365	6.4428980121558	1.17213465398966e-10	6.07136986726055e-09
Slc6a8	1969.58174238214	-0.658208884941739	0.10218989014098	-6.44103721056634	1.18659773729972e-10	6.12748911071655e-09
Vsnl1	7325.86927361715	-0.895216619720038	0.139185762252679	-6.43181174016098	1.26091855561731e-10	6.49142400309569e-09
Rapgef5	3070.26307326608	0.58873623592265	0.0915703755998721	6.42933079684204	1.28166936733497e-10	6.57819724523353e-09
Ptprh	44.7553012777375	1.28661706537653	0.200160793686955	6.42791748412409	1.29363926724644e-10	6.6195129293101e-09
Uchl1	26932.0116465836	0.548911486354592	0.0854423168521863	6.42435161612247	1.32432770001323e-10	6.75607176508262e-09
A930003O13Rik	15.8153786785279	-2.15292891111377	0.336086623919142	-6.40587502712318	1.49509395110098e-10	7.60426399346118e-09
Rapgef6	1886.43108491549	0.933840983841881	0.145794218827043	6.40519899454794	1.50173383265528e-10	7.61509834781293e-09
Cirbp	1791.13322748721	0.702436932423593	0.109782747009156	6.39842736277139	1.56985391536907e-10	7.936692579318e-09
Col20a1	166.80015276961	-1.383474904013	0.216274879461792	-6.39683585747835	1.58629690091145e-10	7.99588342351961e-09
Trhr	77.0404803133794	-1.91109150932183	0.298837489444863	-6.39508621515987	1.60456794024522e-10	8.06390899969665e-09
Rwdd2a	613.265190163583	0.766139784524018	0.11984928284863	6.39252706661297	1.63166332431667e-10	8.17574685294104e-09
Pcdha11	117.524212991173	-1.29194290776903	0.202534230367206	-6.37888669696312	1.78379942058386e-10	8.91160858460917e-09
Dazl	91.7099685893929	1.0552750434147	0.16557744362514	6.3733019444593	1.85001142843749e-10	9.18689008858121e-09
Inpp5f	16393.5582134393	0.809259624691157	0.126983540582155	6.3729489741829	1.85427592568103e-10	9.18689008858121e-09
Calcrl	273.152013174202	-1.8825669842755	0.295423157658837	-6.37244215786746	1.86041595166836e-10	9.18689008858121e-09
Trdn	13.7326776377632	2.03250192168518	0.318952825001802	6.37242175758654	1.8606635143283e-10	9.18689008858121e-09
Wnt10b	28.9483499575339	-1.98023526520229	0.311458084213911	-6.35795108738372	2.04462549026586e-10	1.00657568596587e-08
A730017C20Rik	746.793196707296	1.00370865981712	0.157970343897709	6.35377903884959	2.10088555591095e-10	1.03126609003233e-08
Grm3	437.181892664326	-1.07926393365922	0.17010781652931	-6.34458754264979	2.2302213992714e-10	1.09158024777092e-08
Ptpru	248.312500971568	-1.27489069905659	0.201001688940973	-6.34268650066406	2.25792610566021e-10	1.1019462491381e-08
Arhgap25	10.3556111008744	2.33661952325348	0.369729117437915	6.31981473205404	2.61877073557361e-10	1.27436779944945e-08
Ift52	893.552592837284	0.494265089307567	0.0783988040731368	6.3044978192075	2.89129794459077e-10	1.40294416932068e-08
Tle4	973.405881126564	0.949582211039793	0.15067549741939	6.3021674214005	2.93511864273539e-10	1.42012645848796e-08
B020018J22Rik	11.2668922564806	-2.18569725936479	0.346969097914039	-6.29940035727991	2.98799307961798e-10	1.44157860406941e-08
Emp1	200.634871132995	-1.63903451708336	0.26025414381063	-6.29782293985675	3.01855021445024e-10	1.45217204903723e-08
Htr4	73.382765586091	-1.52103376458046	0.241660076847195	-6.29410444796898	3.09179599189978e-10	1.48318372497783e-08
Arpp21	10220.5954289512	-1.05443547979456	0.167624018085877	-6.29047968086739	3.16486476037009e-10	1.51393502389828e-08
St8sia4	3256.93354247498	-1.01613354209401	0.161698457551238	-6.28412637623349	3.29702429445056e-10	1.57269921570882e-08
BC018473	10.4580647252836	-1.99313800698536	0.31794783805866	-6.26875785397739	3.63939565069637e-10	1.73112211148335e-08
Nmrk2	18.5499477962472	-1.73004239584248	0.276193763336976	-6.26387205467671	3.75533636538719e-10	1.78125308612158e-08
Dync1i1	5413.72385080819	0.450754966484938	0.07204221853967	6.25681684464965	3.92914394560066e-10	1.85847408026366e-08
Creg2	2579.58567187399	0.805393549455293	0.128936999651282	6.24641143840427	4.19989971374416e-10	1.98099180352748e-08
Recql4	116.324212593495	-1.1924557592088	0.190978224630547	-6.24393572364408	4.26695395749827e-10	2.00701349655476e-08
Isyna1	198.494587474059	-1.35034165933062	0.216564337585751	-6.23529097350082	4.50939111608043e-10	2.11515495517039e-08
Fxyd7	582.08343387153	1.20451124549548	0.193340156957596	6.23001069436214	4.66403335266681e-10	2.18163067016986e-08
Arhgap20	3389.66202416327	-0.671630312254919	0.107945952857491	-6.22191285986974	4.91129804887744e-10	2.29094416721946e-08
Tesc	136.735333572877	-0.982370199855369	0.158053912753947	-6.21541208780253	5.11901272273951e-10	2.37559677063529e-08
Ipcef1	303.968581524751	-1.21467023182778	0.195430584235118	-6.2153538382019	5.12091214326213e-10	2.37559677063529e-08
Pdgfc	124.397140400238	-1.37859739586905	0.222047809439126	-6.20856111731644	5.34719268612208e-10	2.47377248487281e-08
Slit2	1396.42353646791	-1.04181225715247	0.168088153728602	-6.19801118664553	5.71810776394423e-10	2.63814119404269e-08
Tap1	351.376432927393	1.20326798600213	0.194288954925609	6.19318780351077	5.89594075242372e-10	2.71277535546122e-08
Itpka	477.61033503719	-1.62316565841197	0.262117771833303	-6.19250517452227	5.92154050556709e-10	2.71715035263603e-08
Acan	560.812753880783	-1.73064744661996	0.279573695325662	-6.19030858609215	6.004654487939e-10	2.74782102122867e-08
Itm2b	9416.26920296528	0.433829384395289	0.0701055941618456	6.18822776672788	6.08443727413161e-10	2.77680561651315e-08
Dab1	3261.81841489058	-0.861387375071058	0.139285967673459	-6.18430836543771	6.23753340797913e-10	2.83900240234867e-08
Rac2	81.5644294974146	2.22360840147455	0.359581966073924	6.18387074789344	6.25485871238749e-10	2.83923505960686e-08
Psg16	39.7338667755609	-1.29193970678228	0.208997680983269	-6.18159828713936	6.34558324552576e-10	2.87269487088332e-08
Cenpf	267.240423388503	1.29891229553259	0.210344077703973	6.1751788294254	6.6088622862516e-10	2.98388365148782e-08
Slc1a2	11239.3950551083	0.720418763506634	0.116731285111012	6.1715996943023	6.76024831882713e-10	3.04409474964573e-08
Nr3c2	473.454744199945	-1.0507241522066	0.170341664937022	-6.16833322954235	6.90135853686596e-10	3.09937075142337e-08
Pmaip1	572.766756388123	-0.862916077090045	0.140031664250087	-6.16229251941859	7.16992435165793e-10	3.21144144833145e-08
Rasgrf1	1208.60712266302	-1.13094585043271	0.183692586304091	-6.15673105369917	7.42618014804606e-10	3.31742005237846e-08
Ppp1r2-ps9	5.92511211690493	-8.34713916762224	1.3560636132621	-6.15541858507851	7.48794555450679e-10	3.33618597977313e-08
Plk2	9465.34085412516	-1.05237721554497	0.171078202235851	-6.15143952760354	7.67828029177494e-10	3.41198528965557e-08
Nell1	1653.84650600894	-1.19517428940184	0.194317528368826	-6.15062521345645	7.71780997746215e-10	3.4205495873865e-08
Cd5l	8.43140266304164	2.54053621280677	0.41320029177119	6.14843760617089	7.82498969421247e-10	3.45897319310135e-08
Aif1	45.3835977165432	1.68315157925434	0.273951811375272	6.14396952078803	8.04842927313723e-10	3.54845369990066e-08
Htr2a	407.426536162491	-1.07298387542566	0.17485328201074	-6.13648118632252	8.43693504954724e-10	3.7100543032983e-08
Chst9	8.65479779070844	-2.34764471870845	0.382741454372355	-6.13376129470552	8.58252681614764e-10	3.76427396928491e-08
Tex15	476.558665305382	-0.854468175899162	0.13961047427421	-6.1203729902163	9.3356570096172e-10	4.07624001052389e-08
Rpgrip1	36.0864499977163	1.42510015671696	0.232849485807944	6.12026327553236	9.34208743380756e-10	4.07624001052389e-08
Scube3	45.5262851368488	1.46004493949699	0.238644897661198	6.11806476403195	9.47185738894832e-10	4.1222109244789e-08
Pkhd1l1	26.2094429173907	-1.57927673472787	0.258155938929824	-6.11753013033404	9.50367957640904e-10	4.12542759195998e-08
Kcnip2	266.856205681321	-1.01094972886088	0.165573196487728	-6.10575715336759	1.02314475796561e-09	4.42995445718135e-08
Acvr1c	311.090337447349	-1.06285804129256	0.174350641412771	-6.09609481605677	1.08690960316451e-09	4.69400397929305e-08
C1ql3	1619.09726293533	-1.27784412827231	0.20972368105791	-6.09298922194422	1.10821526467402e-09	4.77380687736876e-08
Kcnh5	88.3277045127135	-1.44646244877783	0.238031224155696	-6.07677607804808	1.2262280374276e-09	5.26872433587847e-08
Dnah6	298.838793695527	0.835325953397151	0.137885670156461	6.05810562076024	1.37733951341523e-09	5.90298350851006e-08
Xdh	26.5982490718135	-1.61857780284691	0.267194437368261	-6.05767776750571	1.38100688003501e-09	5.90371700665094e-08
Hibadh	777.44814597906	0.710076568229029	0.11726155777281	6.05549322144241	1.39988069876136e-09	5.96928926244555e-08
Pvrl3	2810.19176011052	-0.875103698801682	0.144719711005296	-6.04688672139248	1.47671507208213e-09	6.28106063153119e-08
Kcnj2	766.929404257893	-1.12227209457491	0.185816262300492	-6.03968716559391	1.54413306828652e-09	6.55131431936838e-08
Sstr2	666.934016263799	-0.664848241154916	0.110132325310335	-6.03681289105158	1.57187805868629e-09	6.65231400976858e-08
Osbpl2	2283.59071434594	0.40459256916769	0.0670928937126943	6.03033416475134	1.63620995584646e-09	6.90726032860583e-08
Adcy7	181.106086797782	1.11743409930765	0.185341221540975	6.02906406905603	1.64911906746281e-09	6.94439515540572e-08
Mc4r	71.0065454887654	-2.07349651399559	0.344157883227864	-6.02484096702426	1.69275986093732e-09	7.11043358502181e-08
Cabp7	25.415074196717	-1.54464082944713	0.256849185059235	-6.01380467331796	1.81218848955584e-09	7.59320467360794e-08
Def6	40.6046018792829	1.23908877278677	0.206301209356367	6.00621187172179	1.89907995075675e-09	7.92907092159589e-08
Dusp5	82.57868258992	-1.41938537481469	0.236328490222715	-6.00598503158495	1.90173737015654e-09	7.92907092159589e-08
Fzd7	44.8219168133997	-1.29223149611295	0.215326768610171	-6.00125801568318	1.95794573164852e-09	8.14331813414211e-08
Crb1	183.199852765459	1.04907649920762	0.175019210614224	5.99406485451469	2.04659690523213e-09	8.49111433458224e-08
Nyap2	885.5190636429	1.00714773416928	0.168070779576859	5.99240234801616	2.06763595888621e-09	8.55737764748835e-08
Adamts2	30.062778209708	-1.63395018030267	0.272963085516831	-5.98597490649307	2.15097531190276e-09	8.88053034640342e-08
1700101E01Rik	21.1445493060953	1.6483994780756	0.275907524146475	5.97446366558852	2.30848375793097e-09	9.50757481376155e-08
Tmem74	1378.34199934992	-1.00172089827804	0.167742309814215	-5.97178433626858	2.34672620969631e-09	9.64156174621216e-08
Abca4	15.5366267391604	-1.71409621322916	0.287302137389256	-5.96617981615218	2.42872624910557e-09	9.94368324647338e-08
Stk32b	435.95035761061	0.931854433939082	0.15619529096353	5.96595728456796	2.43203907425886e-09	9.94368324647338e-08
Gpm6a	116550.168218837	0.65916634594066	0.110525586364204	5.96392534637705	2.4624927924912e-09	1.00438776072479e-07
Sdk1	186.646915511029	-1.05715995949161	0.177299350413914	-5.96257096838552	2.48299751312831e-09	1.01031074714903e-07
Fhl1	4180.81808986872	0.367411912085562	0.0616393644647118	5.96067002436249	2.51205775062095e-09	1.01967805713907e-07
Pkp2	75.4436312869619	-1.14053066756119	0.191403399795663	-5.95877956597839	2.54128610090105e-09	1.0290685155831e-07
Spr	399.317378705389	0.733747695471837	0.123184585953834	5.95648952172331	2.57713627721858e-09	1.0410890712228e-07
Lmo4	2360.06801740831	-0.996321362891391	0.167323397481929	-5.95446529227328	2.60923492506059e-09	1.05154035667239e-07
Mx1	12.5160729402552	1.86340280774425	0.313659005269373	5.94085543995125	2.83538567598146e-09	1.13996006011007e-07
Rxfp1	33.5825848524413	-1.89580802941726	0.319285810429645	-5.93765199545253	2.89132952070142e-09	1.15969098067849e-07
Slit3	146.191222662007	-1.30017503728269	0.21913541781552	-5.93320354255673	2.9708017527746e-09	1.18874308998464e-07
Trabd2b	9.73564797996137	-2.78937025334796	0.470814005373566	-5.92456940853903	3.13116740945291e-09	1.24995018619437e-07
Loxhd1	6.80673290579812	-2.84787589001066	0.480965438529032	-5.92116535175689	3.19668245563547e-09	1.27309386664765e-07
Hrh3	190.445883729089	1.31663839434828	0.22242730327138	5.91940995994487	3.23098666191516e-09	1.28372801819057e-07
Ly9	22.5715457576471	2.21642572285313	0.374822296885275	5.91327074528741	3.35380214930937e-09	1.32939678622625e-07
Hs6st3	275.646916889261	-1.26206084555452	0.213530567016735	-5.91044581198351	3.41183077149415e-09	1.34923125075996e-07
Wfdc3	14.9099174324732	-1.75511018340565	0.297095396729121	-5.90756438076313	3.4720265800851e-09	1.36982805680647e-07
Fam160a1	51.8163104590043	-1.43674758199181	0.243542177845648	-5.8993788866518	3.64872490474591e-09	1.43618575155104e-07
Krt6a	41.3256180396586	-2.25611659466283	0.382719167850979	-5.89496629429678	3.74757870151039e-09	1.47166544078382e-07
4921506M07Rik	10.0166099212308	-2.01974299105176	0.342894347145191	-5.89027788841484	3.85546743407389e-09	1.51052025734969e-07
Il1rap	215.919496452692	-0.969200411013017	0.164572286944702	-5.88920789159767	3.88051047821752e-09	1.51681249849956e-07
Syt4	45438.5433352785	-0.853523986994952	0.14502558143667	-5.88533401169413	3.97250899603464e-09	1.54918676459679e-07
Fcrl5	6.16253640892	3.82751369288607	0.650971793522837	5.87969207110016	4.11030402661059e-09	1.59923027173609e-07
Gpr50	16.6696046808711	1.84490961976585	0.314052925068939	5.87451818626071	4.24074924724209e-09	1.64619061583747e-07
Ctss	72.4465643482169	2.39340158258912	0.407862608791254	5.86815641100867	4.40667452593826e-09	1.70667674415123e-07
Pcdh11x	5891.72417461729	-1.27852704065966	0.218389936491836	-5.85433129931539	4.78933073467063e-09	1.85063246649081e-07
1110032F04Rik	162.735886753854	-1.03827977252312	0.177377026479016	-5.85351887520761	4.81279604467813e-09	1.85545374453048e-07
Fhod3	1403.82066578359	-0.545474627000968	0.093301360486734	-5.84637377370854	5.02404475676867e-09	1.93068298483564e-07
Pitpnm3	410.96904787258	0.966321448041541	0.165291929221071	5.84615021795244	5.03079778116594e-09	1.93068298483564e-07
Fbln1	144.705841121332	1.081616233197	0.185072143907149	5.84429515086642	5.08717617432874e-09	1.94789244625204e-07
Zfp608	1213.83120113215	0.728592318665337	0.124807827972206	5.83771331095989	5.29221172368921e-09	2.02181645172434e-07
Bche	64.7396472958752	-1.50504183110987	0.257977008590189	-5.83401536181354	5.41091363750431e-09	2.0624985932934e-07
Cd53	32.5176265700303	1.87901664800496	0.322343561751459	5.82923585566684	5.56817584220455e-09	2.11766255115915e-07
Satb1	1098.64594979922	-0.993264836741914	0.170556549203867	-5.8236686974398	5.75696459832501e-09	2.18454166758014e-07
Ctxn2	305.424155723897	1.08614632146863	0.186569825177316	5.82166124900613	5.82655528829502e-09	2.20599131385986e-07
1700001L05Rik	192.348514680535	1.37056045114558	0.235735935387584	5.81396488784021	6.10102165930555e-09	2.30473941250634e-07
Magi3	2560.57590185307	-0.548217165422772	0.0943529334612233	-5.81028215352812	6.23676400811208e-09	2.35075886252189e-07
Gm13446	11.7833489646172	1.73757856920574	0.299269752996811	5.80606142721098	6.39595047063923e-09	2.40539019258829e-07
Grp	415.319134842984	1.8053877836265	0.31117088890315	5.80191736441136	6.55608721120313e-09	2.46013530329725e-07
Fut7	26.2015991903326	-1.56385359094138	0.269655381824084	-5.799452547035	6.65317615347769e-09	2.49103176336196e-07
Mapk15	120.038047476248	0.983690517830607	0.169669262050785	5.79769432565913	6.72328538346338e-09	2.51171232268059e-07
Dpp4	13.0928845832075	1.71580851048724	0.296057263634727	5.79552918047703	6.81060842490912e-09	2.53871818682153e-07
Mettl7a1	214.519878333926	0.659760712696854	0.114041826172241	5.78525208549711	7.2403669236145e-09	2.69296995313116e-07
A730018C14Rik	6.04877082876573	-2.63809789922466	0.456552928529886	-5.77829586532149	7.54610261161088e-09	2.80051623515739e-07
Cntnap5a	353.229198476752	-1.11836029785639	0.193769050477956	-5.77161468819615	7.85154910418959e-09	2.90748373187161e-07
Cnksr1	13.2453171650517	-1.71309510324066	0.297052475074916	-5.76697804927773	8.07055591771585e-09	2.98150062767498e-07
Paqr5	7.48772667063945	-2.52070709257907	0.437118840208701	-5.76664023764238	8.08674219753135e-09	2.98150062767498e-07
Rfc2	1134.84370536917	0.513273503139986	0.0891578752304726	5.75690595825862	8.56696040553835e-09	3.15167088034685e-07
2900008C10Rik	69.4414326257209	1.08598481771405	0.188955869445497	5.74729338072928	9.06833078727431e-09	3.32886594943291e-07
C130080G10Rik	11.3209664883664	-1.89210139591069	0.32957239132283	-5.74107979226118	9.40747477743457e-09	3.44587026229415e-07
Fstl1	1546.60176847185	-0.646169360342672	0.112983563802806	-5.7191447905684	1.07061536365885e-08	3.91307598068038e-07
Ypel1	3351.33434184698	0.977691046028746	0.171208635862803	5.71052412807152	1.12628767448522e-08	4.10766601973164e-07
Igsf6	14.6325083933702	2.67124127521183	0.467910201801641	5.70887590167191	1.13724771128157e-08	4.1386993217027e-07
Sdk2	209.403753148908	-1.11433670784658	0.195644083541377	-5.69573425209616	1.22842092252541e-08	4.46088509629333e-07
Hdac9	7002.57539364464	0.827391729225995	0.145286979885914	5.69487871436038	1.23459653030857e-08	4.47369034566321e-07
Nlgn1	3878.36768825284	-0.692441591650741	0.121615640636679	-5.69368864091568	1.24323713846214e-08	4.49535381586117e-07
Ntng1	82.5631374973422	-1.3684712834528	0.240490858024993	-5.69032558946828	1.26797365165942e-08	4.57500065853014e-07
Accsl	11.7077134251859	-1.98895108082662	0.34976387047724	-5.68655384020302	1.29628530997075e-08	4.66717990280727e-07
5330413P13Rik	136.151729641519	-0.986315591498656	0.173643923381953	-5.68010427482177	1.34612650233764e-08	4.83631747201563e-07
Aldh8a1	13.6027147227874	-1.82843741333313	0.322048121044916	-5.67752858610259	1.36654695471057e-08	4.8992594219199e-07
Tnfrsf1b	27.4507228900134	1.59142103628144	0.280334280666355	5.67686917382574	1.37182306989026e-08	4.90775516062859e-07
Vwa3a	251.760882133007	1.0876489136563	0.191640509131041	5.67546453820251	1.3831279533321e-08	4.93773755178983e-07
Grap	9.02946122286548	2.21257961251772	0.390419869128478	5.66717984270828	1.4516695434171e-08	5.1714961835741e-07
Blcap	3361.9151971594	-0.639717655960131	0.112909501700783	-5.66575572758635	1.46377933193349e-08	5.20365848400609e-07
Cx3cr1	19.7078068454867	2.24856781139223	0.397008511287946	5.66377734345691	1.4807652546547e-08	5.25298363237379e-07
Gm4890	40.6128636648543	1.28441356815244	0.226898314560613	5.66074530187541	1.50716979104057e-08	5.33544425398553e-07
Pdzrn3	512.011166832868	-0.794220186026938	0.140367867888984	-5.65813385906155	1.53027765282581e-08	5.40591390075661e-07
Rabgap1l	13085.3420459346	0.50543463979262	0.0894678506355139	5.64934371623308	1.61061534471658e-08	5.66854235417369e-07
Tigd3	114.012133915343	0.894272509089919	0.158298859459746	5.64926691286318	1.61133502902012e-08	5.66854235417369e-07
Insm1	82.8288855433691	1.09447624347585	0.193752876370083	5.64882578251545	1.61547468401023e-08	5.67129012769162e-07
AI504432	3463.01043888815	0.868496743268008	0.154011878005583	5.63915429455724	1.70887362759227e-08	5.98673030612513e-07
Lix1	2054.29452849072	0.869386879330481	0.154219896863197	5.63731980771382	1.72717177791273e-08	6.02949265575553e-07
Vipr1	93.7915109689407	-0.977010214902178	0.173314338130934	-5.63721516314521	1.72822127524913e-08	6.02949265575553e-07
BC029722	972.334583302017	0.526502389205321	0.0934066753362119	5.63666769329072	1.73372204239707e-08	6.03621245524059e-07
Nab2	165.837990897057	-0.988662830159606	0.175491623242358	-5.63367533955874	1.76408982109434e-08	6.12930467469117e-07
Gm16532	315.155782499531	0.614974146755262	0.109171100828823	5.63312215491465	1.7697600847831e-08	6.13637962867505e-07
Gpc4	255.086416987245	-1.03490980891109	0.184494338598989	-5.60943938318098	2.02983077123268e-08	7.0237136071793e-07
Psme1	1498.44816245912	0.443486990695487	0.0792344308067195	5.59714995337452	2.17904225080862e-08	7.52460274992931e-07
Parp8	1731.96434688172	0.566318239286977	0.101199401173822	5.59606314581107	2.19273865055477e-08	7.54937365352405e-07
Syt13	1897.04462154272	0.764793071033055	0.136670939257142	5.59587191827315	2.1951572094518e-08	7.54937365352405e-07
Fbn2	417.329520659249	-0.95510927423232	0.170725538052381	-5.59441361338267	2.21368655125358e-08	7.59762420822521e-07
Bcl2a1b	14.3233188770102	2.48581210068794	0.44497761889655	5.58637557289337	2.3185753062061e-08	7.94147314819397e-07
Fam102b	4319.17414257377	0.886168711576886	0.158719952985581	5.58322186283276	2.36103236142512e-08	8.07052478846652e-07
Fam198b	56.4910032122335	-1.30119329857186	0.233269367582088	-5.57807187484215	2.4319917235078e-08	8.29628530164702e-07
Zc3h12d	6.53151784521792	-2.18881720332899	0.392660537138777	-5.57432437514189	2.48492346077731e-08	8.45976160457371e-07
Pcdhgb6	209.907825365289	-1.05290793372964	0.189230095616354	-5.56416742432085	2.634069618284e-08	8.94947677552185e-07
Gpr6	75.2056795470392	-1.48750948197128	0.26738176060406	-5.56324215462847	2.64808022889019e-08	8.97674477014781e-07
4930590J08Rik	24.0658845398901	-1.41125970152508	0.253689711075173	-5.56293629546095	2.65272749040848e-08	8.97674477014781e-07
Fam174b	2097.56658221096	0.706435472615091	0.127014945878348	5.56182949754353	2.66961054214922e-08	9.01580872294634e-07
D8Ertd82e	283.20361351204	-1.62272879968595	0.29200914244989	-5.55711641790263	2.74267841938201e-08	9.2440853871626e-07
Tes	2281.12261377881	-1.22195882624109	0.220000348955791	-5.55434949099396	2.78647483036359e-08	9.37299083376885e-07
Scd3	15.0394123210344	-1.63306834610587	0.294073050134475	-5.55327441722079	2.8036740928327e-08	9.41209557287734e-07
Slc26a8	46.8197586041418	1.21828858342742	0.219504239571464	5.5501824739507	2.8537157942849e-08	9.56108033775691e-07
Rnase4	400.247978490851	0.962944574203727	0.173568439409382	5.54792436620637	2.89080870897882e-08	9.64766627394392e-07
Tyrobp	38.0011649617616	1.89881434085156	0.342257372032318	5.54791363463243	2.8909861036454e-08	9.64766627394392e-07
Fxyd6	12594.3296958312	0.514121710633368	0.0927456720952848	5.54334988381098	2.96739080589172e-08	9.88310870774904e-07
Eml2	1950.20522109817	0.818584173776984	0.14771803387325	5.54153174337111	2.99837207008597e-08	9.96663597942357e-07
Isg20	13.3123088242075	-1.95235979253728	0.352435259503017	-5.53962675383382	3.03116986199157e-08	1.0055861353554e-06
Pcdhb18	575.607436916074	-0.71379645395794	0.128926907051682	-5.5364428596104	3.08676480306343e-08	1.0220217738143e-06
Cdh9	602.912362049566	-0.998490067595477	0.180371136488018	-5.53575304251524	3.09893963568619e-08	1.02404490583556e-06
Fcer1g	38.1797321963693	2.27114008456957	0.410630715399327	5.53085777414616	3.18668628633766e-08	1.05098407482613e-06
Hs6st2	1737.51041352086	-0.819991492169493	0.148336821091696	-5.52790255403012	3.24081965495551e-08	1.06675400962142e-06
Mapk4	1309.07941200108	-0.841041334319566	0.152197021592246	-5.52600389627084	3.27606858047091e-08	1.07625863910179e-06
Tlr7	27.4662698435033	1.81264225000254	0.328268757960602	5.5218238289374	3.35498789949635e-08	1.10004515865816e-06
Drd1a	178.044586073288	-1.05690132143695	0.191600283353336	-5.5161782797987	3.46450817163978e-08	1.13316460871902e-06
Sepp1	184.476432235336	1.23375996737141	0.223672190320332	5.51592920695455	3.46941906139839e-08	1.13316460871902e-06
Piwil2	28.1951145021648	-1.56189668874043	0.283209486457044	-5.51498718591592	3.48805372070216e-08	1.13705164339337e-06
Enpp5	6619.81397167567	0.461827465076749	0.0838415689758193	5.50833519360717	3.62243154619107e-08	1.17858148533685e-06
Pax6	158.572330065804	0.846964404135317	0.153789221847927	5.50730664970027	3.64365250149805e-08	1.18320607962108e-06
Fgd2	54.7335730328737	-1.4380123175105	0.261197374878133	-5.50546236608019	3.68200613590056e-08	1.19336575068746e-06
Hlf	95.8970240018451	-1.18002537000797	0.214628831710508	-5.497981611341	3.84162979356243e-08	1.24100341475748e-06
Slc2a2	11.201336548744	-1.83960860077712	0.334602825002976	-5.49788723619043	3.84368581024613e-08	1.24100341475748e-06
Krt1	92.5651402615957	0.916202700484812	0.166732117689428	5.49505825980945	3.90581449165651e-08	1.25865617378076e-06
Nek11	57.956777449024	1.05470026514978	0.191978484422968	5.49384618969105	3.93273042132878e-08	1.2649159218011e-06
Atp1b1	21117.5111759821	-0.476927895917422	0.0868809577245531	-5.48944105139209	4.0320765294018e-08	1.29440388356424e-06
Ppp1r18	257.506505685793	0.921553384369145	0.167970168421821	5.48641102778954	4.10181867671381e-08	1.31429431072086e-06
Gcg	6.1869130707494	3.67337563582982	0.669755142657955	5.48465461758436	4.14278007124307e-08	1.32490500536005e-06
Cdc42ep2	368.265747176978	0.668750956516889	0.121948924481012	5.48386104562175	4.16141685258447e-08	1.32834943237696e-06
Cyp11a1	63.1007885506523	1.15495865958482	0.210671002667681	5.48228586260014	4.19865064004715e-08	1.3377059378837e-06
Megf11	205.218170893867	-0.910140749659963	0.166170879238114	-5.47713747338231	4.3226139159262e-08	1.37460750629623e-06
Exph5	71.8638491966569	-1.2816473180071	0.234218479452612	-5.47201621751802	4.44944103947465e-08	1.41227934948438e-06
C1qtnf7	9.14393894023023	2.15393732260169	0.393959156730027	5.4674127655262	4.56651818382603e-08	1.44672093906353e-06
Drc1	701.084884256189	0.560004282227334	0.102522595186825	5.4622523084482	4.7013123940659e-08	1.48663597539694e-06
Morc1	11.4864314654186	2.01791785775655	0.369464332111225	5.46173928678198	4.71492169512731e-08	1.48815266811065e-06
Nostrin	21.4242851748512	-1.38385189709839	0.253786769559455	-5.45281339724921	4.95790880311219e-08	1.56192626957747e-06
Chst15	377.062342879703	-0.670001946992041	0.123098257194477	-5.44282236208703	5.24429380055456e-08	1.64907160365297e-06
Mir335	19.4272798519391	-1.78029014339633	0.32715219452575	-5.44177961568346	5.27509115113505e-08	1.65567266130235e-06
Sybu	6112.53478853882	0.663245404511287	0.121975636133542	5.4375236361559	5.40261852068271e-08	1.69255317885433e-06
Sh2d5	367.108118611687	-0.692557530421623	0.127576896304609	-5.42854976474769	5.68138051833926e-08	1.77658873023476e-06
Ankrd45	461.474973813507	-0.755285323072074	0.139227143320027	-5.42484249163958	5.8005667026052e-08	1.81050590277618e-06
Ano5	98.6328669190382	1.04696780451922	0.193091191283808	5.42214172256242	5.888916268474e-08	1.83469077692716e-06
Tmsb10	17486.428250312	0.559996065565836	0.103311407583085	5.42046690357475	5.94435772210311e-08	1.84855293730079e-06
Arhgef26	1137.30434250448	-0.781441929830305	0.14425554530364	-5.41706683223487	6.05846993440765e-08	1.88057579618396e-06
Bend6	6890.95677719197	0.509649930444788	0.0941374737018771	5.41389003128332	6.16700493216721e-08	1.91075312448762e-06
C1qc	76.2208916083065	2.27071659292668	0.419608761946636	5.41150900279688	6.24958518452119e-08	1.93118474127952e-06
Zfp804a	749.921431667336	-0.850325514725926	0.157137976768782	-5.41133042572593	6.25582170721247e-08	1.93118474127952e-06
Rsph9	636.424073657609	0.582286155655393	0.107640158379881	5.4095624200069	6.31789277760911e-08	1.94678717961145e-06
Fam13a	111.899664546745	-1.02483172847761	0.189564706448101	-5.40623699252894	6.43626226956936e-08	1.97964890134696e-06
3632451O06Rik	986.382696889822	0.752703906652022	0.139243978273624	5.40564781317083	6.45745712617515e-08	1.98255674604716e-06
Lpin3	44.9251514303048	-1.08014046803988	0.199968969395348	-5.40154040552358	6.60710524310174e-08	2.02481994800392e-06
Fam181b	150.42010766782	1.04286204529358	0.193286141468048	5.39543102973049	6.83592480283318e-08	2.09114902573625e-06
Tlr1	20.492872325331	2.31001744112005	0.428264882169473	5.39389881658784	6.89450522291171e-08	2.10525524763268e-06
Prss23	235.106152567858	-0.868259654698572	0.161000351902709	-5.39290532248806	6.93274860197125e-08	2.11311178507015e-06
Ryr3	1421.59953174991	-0.851957374394671	0.158103571254041	-5.38860297485465	7.10074738275577e-08	2.16041838387773e-06
Asb2	25.7864144960809	1.83635458814404	0.34081329628433	5.38815418343309	7.11849729783016e-08	2.16192347789856e-06
Cdh18	355.661085854301	-0.972175306228756	0.180456553565136	-5.38730950482133	7.15202137651422e-08	2.16820525967359e-06
Cntnap5b	332.73998776583	-1.28164005811707	0.237997311146085	-5.38510310030513	7.24031343636894e-08	2.19103822018864e-06
Cachd1	405.956857986963	-0.88506512855122	0.164470562180232	-5.38129812909218	7.39506024148636e-08	2.2338638146286e-06
Tec	76.6838018533426	-1.10923349578553	0.206216204029287	-5.37898319391038	7.49077002750262e-08	2.25873469079302e-06
Tmem255a	221.743520994817	-1.13268202195373	0.210606153300151	-5.37820003929069	7.52341990436759e-08	2.26222658161016e-06
Adra2a	143.963163903681	-1.4437171868262	0.268445566573745	-5.37806306601674	7.52914449167898e-08	2.26222658161016e-06
Gfra1	412.740426902932	-1.01458284850438	0.188664209781389	-5.37771763748939	7.54359988648576e-08	2.26254400858257e-06
Rassf5	192.580936680044	0.807140264920406	0.150105415298475	5.37715620262906	7.56715201788687e-08	2.2655838470574e-06
Mreg	59.681902585974	-1.06461592519232	0.198123622963936	-5.37349312144419	7.7225752650618e-08	2.30802488364307e-06
Spib	9.02631440785417	2.69454511306162	0.501524265757736	5.37271134626063	7.75614376832671e-08	2.31396190233153e-06
Clec12a	25.6622652990275	2.07441211954361	0.386339417254016	5.36940324207119	7.89976063904404e-08	2.35265181923982e-06
Sash3	9.03079372226726	2.23029993723706	0.415796753157931	5.36391859796447	8.14356149503907e-08	2.41830584329096e-06
Clec4a3	15.2306225164046	2.39235587993495	0.446018741995727	5.36380123676029	8.14885718839603e-08	2.41830584329096e-06
Rasgrp1	347.178979077033	-1.699131508571	0.317619050700856	-5.34958940536377	8.81540033694853e-08	2.61152368578444e-06
Ppp4r4	943.701915166186	-0.587968335050945	0.109929475184182	-5.34859585262126	8.86392277928263e-08	2.62129947549854e-06
Pcdhb21	136.140002358997	-0.99407232575151	0.186101522748742	-5.34155933314753	9.2150444086404e-08	2.71751156382467e-06
Cdh23	115.346644439639	-1.00470202543214	0.188095957351487	-5.34143338101995	9.22145046826683e-08	2.71751156382467e-06
Ms4a6c	47.6801576157509	2.28649025983906	0.428219427418461	5.33952948754163	9.31881125813069e-08	2.7414189356236e-06
Herpud1	1864.46273596134	-0.786575203934411	0.148045420553294	-5.31306676690654	1.07795519793231e-07	3.16562634300607e-06
Npbwr1	42.8208527485878	-1.41555498460873	0.266491267979058	-5.31182501904705	1.08532790771141e-07	3.18174427944702e-06
Gmnc	10.3910456595434	-1.82314910823329	0.34325657056793	-5.311330545594	1.08827734231722e-07	3.18486156020253e-06
Hpx	15.1842880630933	-1.68752682292917	0.318075457648985	-5.305429206649	1.12408187680093e-07	3.28395269405892e-06
Nrgn	646.603520282603	-1.14218417160087	0.215321098510976	-5.30456225376654	1.1294369514851e-07	3.2938985082517e-06
Tnn	79.132595308326	-1.27833538174572	0.24106895877382	-5.30277887392837	1.14053043114685e-07	3.32051670005961e-06
Rtp2	5.31680904365566	-2.64749930984524	0.499669697738959	-5.29849883197914	1.16758623836182e-07	3.39343566626123e-06
Nptx1	1015.90136185761	-1.00924948394023	0.190507549487077	-5.29768760690868	1.17278385103255e-07	3.40268524201643e-06
Lrrc75b	372.545223208128	1.00778240235588	0.190569314805891	5.28827216166663	1.234771645952e-07	3.57639005378138e-06
Dnah7b	86.8724696576944	1.08555320291537	0.205539268052175	5.28148812245363	1.28138791307698e-07	3.70505416099621e-06
Foxq1	4.33612198937437	-2.6154413242827	0.495612529645888	-5.27718967507018	1.31180088621489e-07	3.7865076520726e-06
Utrn	706.463747750679	-0.637441446617377	0.120864085390307	-5.27403524842708	1.33456257370871e-07	3.84563542997361e-06
Plekhg4	105.757672254531	-0.930216672748508	0.176624740256406	-5.26662726522974	1.38952929721082e-07	3.99720472107359e-06
Neurog2	38.4764975667557	1.17573418547318	0.223266945135675	5.26604681565696	1.39392751500304e-07	4.00303741808526e-06
H1f0	1902.56442439204	-0.493932245051933	0.0938165184397255	-5.26487502698441	1.40284753181822e-07	4.02181382381705e-06
AI506816	258.440134674191	-1.1191327193391	0.212589503166448	-5.2642896411629	1.40732432498202e-07	4.02780992400785e-06
1810041L15Rik	1147.21849868561	-0.939838523724184	0.178764199153658	-5.25742026744595	1.46090198891428e-07	4.17407630876591e-06
Col6a3	92.5416042721763	1.14601888389676	0.217998091464517	5.25701338116206	1.4641366319579e-07	4.17625188635828e-06
F2rl2	15.7941449924245	1.81882768828002	0.3462807147236	5.25246602234781	1.50076156154678e-07	4.27350079734888e-06
Micall2	34.831476673545	1.22427913424467	0.233229631330194	5.24924353420344	1.52725061633696e-07	4.3416084019303e-06
Rai14	160.125584444069	-0.839400417393522	0.159969005102697	-5.24726909975243	1.54370337937652e-07	4.38100424607595e-06
Cdkn1b	2961.81022097258	0.652969653678606	0.124449164361113	5.24687857110786	1.54697785778195e-07	4.38293089035336e-06
Grik4	240.32522937308	-0.754364876502835	0.144076567230935	-5.2358609800419	1.64217527439466e-07	4.64485287829619e-06
Rfx3	6101.4256913524	-1.02128196041082	0.195075932105561	-5.23530478305328	1.6471283456142e-07	4.65107177994003e-06
Kndc1	1483.77224596438	0.83487253401413	0.159607724855266	5.23077773817779	1.6879836144189e-07	4.75847935109809e-06
Ctsh	34.0276785199812	1.77975593803295	0.340646098162569	5.2246479488034	1.74486767212791e-07	4.91063925192531e-06
Prr15	94.8048296069793	1.08359212707987	0.207475283423188	5.22275284651456	1.76282607487584e-07	4.9529253078791e-06
C1qb	62.3303032233074	2.14862911458403	0.411903519567614	5.21634075095911	1.82492328122478e-07	5.11887948949528e-06
Cers3	79.8025562083085	-1.09909058306998	0.210933258433331	-5.21060828071058	1.88222487435661e-07	5.27085393505568e-06
Scai	7922.877050694	0.518860096372178	0.099677636045685	5.20538123651297	1.9359873255155e-07	5.41243079116801e-06
Dzip1	4106.09338695128	0.448657344402636	0.0862460845170002	5.20206044036932	1.97091102109936e-07	5.50095925657583e-06
Necab3	128.123795194791	-1.20440473393055	0.231633652346653	-5.19961034041845	1.99706745647043e-07	5.56476585312865e-06
Cdk15	41.0222839210472	-1.2843767025779	0.247079755960844	-5.19822717803495	2.01198146141109e-07	5.59708714289746e-06
Dtd2	282.233240832965	0.572729395118307	0.110196158982446	5.19736259781559	2.02135844446067e-07	5.61392412716495e-06
AF529169	527.615116650848	-1.01156751627274	0.194765669107212	-5.19376705817649	2.06080968321419e-07	5.71409397549341e-06
Ccnjl	37.4925473144583	-1.28252858072073	0.247031922893698	-5.19175240874689	2.08323918339068e-07	5.76681587716969e-06
1700020I14Rik	3562.67829656117	-0.542998769081661	0.104608888623549	-5.1907517250826	2.09446751060267e-07	5.78840890082434e-06
Tmtc2	369.229649704653	-0.825132876939372	0.159001506638474	-5.18946577541244	2.1089826057721e-07	5.81900004592609e-06
Rgs4	15729.0002725427	-0.756025994964524	0.145816603889103	-5.18477302858801	2.16278092963428e-07	5.94916676083466e-06
Adam8	53.6482210576117	-0.959380021351603	0.185039302903502	-5.18473646570058	2.16320525355471e-07	5.94916676083466e-06
Bmper	108.761437670866	-0.884258469560908	0.170748035555209	-5.17873290129301	2.23398050015505e-07	6.13382028058833e-06
Kcng1	5.77836596154214	-2.98797549371038	0.577529506418998	-5.17371919616276	2.29479622869588e-07	6.29057290872704e-06
Etnk2	183.042116668972	0.875515392336496	0.169361885186007	5.16949484457459	2.34727609690953e-07	6.42400391773326e-06
Them6	53.3517291310099	-1.29481867756935	0.25058998514214	-5.16708070689617	2.37778606429835e-07	6.49697337892265e-06
Col23a1	357.130350020638	-1.65066409402685	0.31964627158124	-5.16403362335896	2.41684254168997e-07	6.59302151195103e-06
Arhgap29	207.509584687027	-0.932919880458258	0.180802539737301	-5.15988260902615	2.47104735093825e-07	6.72698679464894e-06
Clca3	5.37149894158947	-2.73264971104182	0.529617641350405	-5.15966519558182	2.47391851206739e-07	6.72698679464894e-06
Lrrc9	26.9177683890948	1.39717877620209	0.270917766554979	5.15720616616906	2.50661763115088e-07	6.80494297742986e-06
Chodl	219.331852600053	-0.892035829561358	0.173000449760459	-5.15626306634749	2.51926900923711e-07	6.82831083306225e-06
Slc20a1	3088.7525960114	-0.720453995494477	0.139772321040092	-5.15448259092603	2.54332186170006e-07	6.88245720459411e-06
Stac	148.286607049247	-1.17634455850604	0.228536272336437	-5.14729914196859	2.64263724312797e-07	7.13977159799341e-06
Bhlhe41	158.463124528486	0.741670049618425	0.144292844737354	5.14003345743468	2.74689552583427e-07	7.40158540872457e-06
Sim1	4.36158795529614	-3.4568006353635	0.672537573695102	-5.13993681627468	2.74830868842254e-07	7.40158540872457e-06
Adap2	9.67605088268358	1.83186404601632	0.356587794550904	5.13720344332989	2.78857024469537e-07	7.4980568713258e-06
Capn1	59.8945710220321	-1.07034264354078	0.208416629080045	-5.13559137898592	2.81258175767955e-07	7.55059706839061e-06
Trim16	34.9151715359098	-1.42732901701562	0.278079025969845	-5.13281795359279	2.85435962914832e-07	7.65058995203152e-06
Vldlr	4593.21557374091	-0.440285235347653	0.0858801903958209	-5.12673799764979	2.94805321181259e-07	7.8891959642896e-06
Pcdhgb7	96.3066349662315	-1.03137681122564	0.201254700892466	-5.12473401442048	2.97958072313878e-07	7.9609493814749e-06
A830082K12Rik	336.243418287183	0.710559670557238	0.138687397737694	5.12346242086937	2.99975454076267e-07	8.00218881126673e-06
Mybl1	385.455259704965	-0.766394143158785	0.149640548768476	-5.12156731224334	3.03006536716232e-07	8.07029712774494e-06
Scml4	214.499715369511	1.05850291092881	0.206694939222383	5.12108770012004	3.03778316638899e-07	8.0781112673456e-06
Msrb2	124.585388441633	-0.692283866695327	0.135241929675916	-5.11885528662794	3.07395709919762e-07	8.16145276368727e-06
Slfn2	13.778052528865	2.17847686995549	0.425736867936922	5.11695611543385	3.10505829533619e-07	8.23108545919103e-06
Brinp2	2562.01229842275	-0.53555994337565	0.104725459170547	-5.11394218385313	3.1550396096695e-07	8.33814851650324e-06
Stim2	1390.60349358411	0.340424375498703	0.0665698033067781	5.11379572401473	3.15748810198345e-07	8.33814851650324e-06
Wt1	13.7275756129321	-1.73331825130232	0.338971316476943	-5.11346585108543	3.16300958637274e-07	8.33814851650324e-06
Pcdha10	86.9079070669244	-1.03536135207864	0.202482586830035	-5.11333526644306	3.16519791488723e-07	8.33814851650324e-06
1700001L19Rik	781.689668229231	0.979656615570901	0.191850256995417	5.1063607154527	3.28422486025436e-07	8.63822756857558e-06
Thrb	872.771474702592	-0.773881072036776	0.151598571785866	-5.10480450389657	3.31136664230632e-07	8.69607109206602e-06
Erich6	54.2906132197103	-1.06058094388805	0.207778686396014	-5.10437794310934	3.31884399126791e-07	8.70217385660713e-06
Gpr63	191.802921793886	-0.941369148966794	0.184570852065756	-5.10031317746433	3.39091937110196e-07	8.87737434115158e-06
Smyd3	867.772867943524	0.592300624962183	0.116159132144085	5.09904485363654	3.41371660370912e-07	8.92322268889044e-06
Adamts16	37.356832568595	-1.14135898294284	0.224015329998403	-5.09500391312944	3.48734052387973e-07	9.10158146618749e-06
Nkrf	2072.96947449199	0.479344714966533	0.0940920663657476	5.0944222343174	3.4980638045921e-07	9.11547922906515e-06
Fcrls	105.793136138491	2.1545354840227	0.423189424214411	5.0911846108212	3.55833362037457e-07	9.25824676635515e-06
C330022C24Rik	7.47780462236876	-1.83029950665525	0.359786594769521	-5.08718093798836	3.63425075571511e-07	9.44122434784698e-06
Armc2	277.479204980713	0.695362403114627	0.136822410230261	5.08222594489007	3.7303730188204e-07	9.67604897016916e-06
Homer2	1661.56977831046	-0.554778235171812	0.109187380910316	-5.08097392341973	3.75504668172452e-07	9.72511016374238e-06
Fbxo25	3587.97889202774	0.472954764136775	0.0931449168028857	5.07762291674646	3.82186254199403e-07	9.88299707260508e-06
Rgs13	371.289933508552	1.80064451325435	0.354683985941801	5.07675729557695	3.83930779312475e-07	9.91292834781415e-06
Elavl4	5161.18538411973	0.458243295212532	0.0903143945549815	5.07386776460715	3.89809995046115e-07	1.00493611852652e-05
Large	7619.3979788707	-0.581353625429315	0.114625672333767	-5.07175760536899	3.94158242756021e-07	1.01381283403329e-05
Rarb	141.310390970141	-0.797733563146467	0.15729379696131	-5.0716148923704	3.94454004477006e-07	1.01381283403329e-05
Ism1	369.165977339067	-1.20339979225931	0.237483857122389	-5.06729091754277	4.03517339416859e-07	1.03553097164029e-05
Ptpn6	37.3610632529423	1.63926178102124	0.323856749079545	5.06168787799018	4.15560949621556e-07	1.06481975649615e-05
Apaf1	2229.61523232156	0.499155255279633	0.0986642756060809	5.05912856718798	4.21176829267741e-07	1.07757453621441e-05
Gpr22	4453.67360278461	-0.679426376643242	0.134342274774268	-5.05742795992449	4.24948877204737e-07	1.08558044485313e-05
Folr1	44.7374918793474	-1.42200346351799	0.281373238291458	-5.05379783860262	4.33110049858591e-07	1.10475774953356e-05
Ctnna2	6614.31649179154	0.40284728053615	0.0797214468724686	5.05318576543888	4.34500915666718e-07	1.10663385549747e-05
Cntn3	188.60207832714	-0.823487883368009	0.163113089017169	-5.04857021793836	4.45128864513723e-07	1.1319948804486e-05
Sorcs2	878.735667793971	-0.80519368155466	0.15953209089218	-5.0472207632435	4.48283261038941e-07	1.13830242795542e-05
Hap1	3213.08218141159	0.847011921150449	0.16788081682608	5.04531689304281	4.52770318438981e-07	1.14796990948358e-05
Plec	374.471325095408	-1.01554678694637	0.201367905826375	-5.04324054411136	4.57713260589773e-07	1.1587625364796e-05
Emr1	268.289931763056	1.97991243502911	0.39283078318469	5.04011528571643	4.65251495140517e-07	1.17608334535072e-05
Pcdha7	141.335244901603	-0.880521402941578	0.174746534659817	-5.03884900868397	4.68339767427393e-07	1.18212037560224e-05
Hcls1	29.541456361782	1.90320023591474	0.377844154585985	5.03699796017786	4.72889818270254e-07	1.19182350318082e-05
Efnb1	370.081965474226	-0.933613865679477	0.185426111296797	-5.03496438096096	4.77937694616592e-07	1.20275050838983e-05
BC021891	150.154033495915	0.643393196765506	0.127819635881826	5.0336021717379	4.81348078445545e-07	1.20953030545111e-05
Tmem8c	17.1834071311451	1.3774073910039	0.274182774725102	5.02368317041397	5.06898337444203e-07	1.27184031591127e-05
Chrdl1	78.3261102770697	-1.20502491957648	0.239892520471221	-5.02318670548564	5.08210960844728e-07	1.27324188202138e-05
C1qa	56.3843200057681	2.08633783929398	0.415707016894882	5.01876984150484	5.20034086454363e-07	1.30093267909161e-05
Shisa2	81.2162768414507	-1.1195091956144	0.223115763883469	-5.01761586061265	5.23166514420736e-07	1.30683280510481e-05
Parva	1398.46797997364	0.680417900158214	0.135691848415003	5.01443460389169	5.31896390213096e-07	1.32667687520507e-05
Man2a1	403.180766835321	-0.657058304610802	0.131067284865093	-5.01313737663149	5.35496358476137e-07	1.33368606330797e-05
Lrp1b	1002.23692719654	-1.00461958646817	0.200469218105909	-5.01134087297844	5.40520699411008e-07	1.34421686748958e-05
Parp3	54.5505332301867	-1.10052453134662	0.219733551213206	-5.00845012184229	5.48700906982676e-07	1.36255345813375e-05
Slc7a6	568.670162824873	-0.527726058631713	0.10544258368922	-5.0048665365326	5.59007482103553e-07	1.38610871406763e-05
Arsb	388.848315153777	1.07611886378592	0.215183025124425	5.00094681336352	5.70494505755237e-07	1.41251762817932e-05
Nkain2	2673.94116405615	-0.651688123079951	0.130591228723502	-4.99029015539593	6.02886632662421e-07	1.49053348157213e-05
Irs4	69.0924344725659	-1.28094108995171	0.256929883007761	-4.98556678170836	6.17804348786537e-07	1.52518190549846e-05
Gda	12540.4765052905	0.591660996898579	0.118732095964041	4.98315971005658	6.25542767797624e-07	1.54203141270521e-05
Ccdc109b	119.893546096118	-0.847779540900464	0.170272615288882	-4.97895412871961	6.39287907268314e-07	1.57141498715121e-05
Gm11541	14.1946433933972	1.63668578652441	0.328721517076316	4.97894327417708	6.39323757060808e-07	1.57141498715121e-05
Ms4a6d	38.4918975696725	2.08832146347529	0.419883688747739	4.97357129947937	6.57305825340692e-07	1.61326543120682e-05
Camk2d	2306.8948821322	-0.781738451270256	0.157298932744438	-4.9697632249059	6.70347103279225e-07	1.64288551320363e-05
Prex1	555.448282012412	-1.02314232199894	0.206107176615652	-4.96412759031141	6.90105665866749e-07	1.68885859040955e-05
Lcp1	115.740949252044	1.79329588537994	0.36133710155495	4.96294423590274	6.94325219417975e-07	1.69427753996259e-05
Ablim3	1551.45609075528	0.576214120479966	0.116103292925544	4.96294382321684	6.94326695282548e-07	1.69427753996259e-05
Gm13031	13.7718114921471	1.7799520250515	0.359250743041482	4.95462308576484	7.24706299441287e-07	1.76585722544958e-05
Spry1	204.846795576973	-0.929469273653792	0.187700493783021	-4.95187441929826	7.35020337489255e-07	1.78840827360858e-05
Dcdc2a	41.0455144580471	1.17035812217157	0.236523281006554	4.94817303899627	7.49132979140916e-07	1.82012366701777e-05
Antxr2	152.306404077549	-0.861807095450766	0.174282361994425	-4.944889922242	7.61869023372958e-07	1.84840809320054e-05
Slc26a7	71.7002724011456	1.20062956895584	0.242902612492516	4.94284337511122	7.69913362442981e-07	1.86524491222556e-05
Cep85	288.500687984419	-0.578674472912586	0.117251349836558	-4.93533314302331	8.00140621621433e-07	1.93569835769334e-05
Creg1	1354.5195658876	0.480437667803372	0.0973605094011929	4.9346256583728	8.03046307614541e-07	1.93994849075524e-05
Ggact	336.672620285343	0.507797550104616	0.103139309849904	4.92341427185815	8.50471435499759e-07	2.05030489432837e-05
Asb5	34.7562091575212	-1.3766061595556	0.279612917950183	-4.92325665654996	8.51157012272998e-07	2.05030489432837e-05
Usp43	62.4605571664922	-1.04654471104581	0.212637379542119	-4.9217344255247	8.57805685439946e-07	2.06337703765512e-05
Hapln4	9.54454458246742	-1.66028827981396	0.337413255541821	-4.92063738618641	8.62628222015555e-07	2.07202562687833e-05
Nlrp3	8.96206432934245	-1.88849888377315	0.383831880444699	-4.92011992746714	8.64911999525156e-07	2.07456023067923e-05
Baz1a	412.972945896103	-1.13206049495421	0.230248754837704	-4.91668454733735	8.80222178626876e-07	2.10828818557354e-05
Tmem91	118.988100336696	-0.898162571293041	0.182717373174628	-4.91558386423737	8.8518246560339e-07	2.1171658801953e-05
Arap3	14.2091442856437	-1.57327785940428	0.320109557674653	-4.91481063806067	8.88683134614282e-07	2.12253230708582e-05
Cldn14	3.32778295624739	5.26420233872955	1.07127560934492	4.91395705531707	8.9256308674702e-07	2.12878817553816e-05
Ptk2b	789.66572590435	-0.81194389388985	0.165307436311842	-4.91172031945479	9.02807675532602e-07	2.15018482497088e-05
Cep112	176.458356972332	0.781329367689131	0.159087477093028	4.91131911804873	9.04657174304493e-07	2.15155507680361e-05
Marco	67.4388458932527	1.85736085050972	0.37850943589329	4.90703975748006	9.24612958860154e-07	2.19592326628869e-05
Ptk6	3.880978136878	-2.67445694013222	0.545316080357925	-4.90441605605468	9.37056836575588e-07	2.22235136831677e-05
Nipal3	2248.46638376699	0.788490622514138	0.160783824814135	4.90404195462837	9.38844232815579e-07	2.2234675617565e-05
Clmp	934.814728407444	0.744077649339685	0.151755416614953	4.90313733728281	9.43179923980722e-07	2.23060731041155e-05
Il6st	1665.16132270113	-0.446271454168365	0.0910409313854781	-4.90187707196008	9.49252327881235e-07	2.2418286445598e-05
Osbp2	1023.99191009702	0.499513087352492	0.101928135703972	4.90063988615685	9.55250127196532e-07	2.2528426882459e-05
Sept11	4939.33457866349	0.463434419757675	0.0946064681599922	4.89854899745275	9.6546964847314e-07	2.27376854729671e-05
Gm136	3.98052348769474	-2.38821226473687	0.487620936306121	-4.89768196342904	9.69738202931886e-07	2.28064057029357e-05
Prkd1	229.959995486888	-1.09781649838707	0.22416825692111	-4.8972879276722	9.71684106322997e-07	2.28203863968987e-05
Odf3l2	18.5276152660927	1.31816370950076	0.26918240736056	4.89691626739604	9.73522955231481e-07	2.28318175306094e-05
Gpr26	1000.20309306301	-0.752644725044526	0.153723854651143	-4.89608282821531	9.77658716484787e-07	2.28970112157588e-05
2010107G23Rik	1063.57875323539	0.526097336672025	0.107589264938294	4.88986830585521	1.0090346151867e-06	2.35991115125243e-05
Acp5	8.55762269998543	2.02911228373068	0.415079127036209	4.88849511229138	1.01609720072706e-06	2.37314209287373e-05
Hsh2d	8.43700828253463	-1.91776686932469	0.392388476623754	-4.88741893193658	1.02166542637846e-06	2.38285115881583e-05
Oasl2	16.1546970344533	1.52490551125751	0.312040677711491	4.88688052609417	1.02446218355718e-06	2.38607840435124e-05
A330093E20Rik	24.0949023232571	1.19660219711182	0.244997943514819	4.88413159696355	1.03885678297381e-06	2.41627212634927e-05
Gatm	605.9561137675	-0.646198930364403	0.132319818422777	-4.883614095507	1.04158833384328e-06	2.41929306812623e-05
Galnt18	549.971291158863	-0.798851632103098	0.163606791469441	-4.88275349041551	1.04614621742982e-06	2.42654189938462e-05
Nudt10	1025.85163430846	0.546788759482428	0.112092808938522	4.87800033436862	1.07166743352363e-06	2.48232870815912e-05
P2ry4	6.34519860103894	-2.12113060122984	0.435168610927439	-4.87427297825837	1.09209892089532e-06	2.52618936688197e-05
Adamts3	710.66292449923	-0.944012469866245	0.19384338916991	-4.86997505516573	1.11612337885135e-06	2.57822973670093e-05
Masp2	42.1040885658174	-1.55126866351956	0.318779760805254	-4.86627086864289	1.13723630082427e-06	2.62341149941511e-05
Morf4l1	10347.2337165212	0.466336390734225	0.0958429007074758	4.86563310680194	1.14090994767455e-06	2.62829541288301e-05
Rtp4	8.28675973552435	1.71063880432614	0.351830861663414	4.86210560448973	1.16143627779639e-06	2.67193637423294e-05
Mef2b	11.5306840947865	-1.47514338830196	0.303459476976559	-4.86108854796421	1.16742016153198e-06	2.68204855069782e-05
Rab31	2512.25453801448	-0.443825689512929	0.091329591262811	-4.85960446527973	1.17620505908274e-06	2.69855959615096e-05
Gabra1	3226.83722727753	-0.694116525524812	0.142867791618279	-4.85845352309628	1.1830617158209e-06	2.71060788783605e-05
Syt12	114.170224868573	-0.98264531178803	0.202491293999176	-4.85277807445898	1.21743902495661e-06	2.78457241949498e-05
Dkk3	517.576930952148	-1.00694289230774	0.207506609426396	-4.85258226275878	1.21864208101788e-06	2.78457241949498e-05
Kcnj16	173.692464029952	-0.970496030557827	0.200249298526275	-4.84643910215989	1.25697147421623e-06	2.86827301535341e-05
Abcg3	4.48567569508124	2.58673773523302	0.533941080734594	4.84461268961398	1.26858900708555e-06	2.8908763797094e-05
Maml3	266.428359195957	-0.807359445746663	0.166698144414894	-4.84324194837605	1.27737586047315e-06	2.90697692452152e-05
Pcdhb15	146.430274867581	-0.944975270259897	0.195228949773596	-4.84034397232464	1.29614586521634e-06	2.94572262180931e-05
Neurl1b	1388.87968213337	-0.858071853341445	0.177311132416101	-4.83935690697515	1.30259938022554e-06	2.95641036753878e-05
2010002M12Rik	17.571846373594	-1.28948352347362	0.266483534371546	-4.83888629935294	1.30568712155121e-06	2.95689496797923e-05
Fli1	10.2779982543053	2.11684366364011	0.437473696477507	4.83879072201304	1.30631508119892e-06	2.95689496797923e-05
3110007F17Rik	55.5229314580133	1.2335677390517	0.255082428850843	4.8359573201846	1.32506353036034e-06	2.99531764038349e-05
Asb13	534.095487539006	-0.441927186355349	0.0915137486659088	-4.82907970439177	1.37165501191458e-06	3.0964928517633e-05
Mt1	1681.87552617018	-0.974223950119545	0.201836554017352	-4.826796389101	1.38746844258866e-06	3.12800962904566e-05
Figf	11.8709578120766	-1.70421625120834	0.353133174210198	-4.82598740551612	1.39311312416147e-06	3.1365477619454e-05
Pold3	863.720037732906	0.338213781978261	0.0701724420124192	4.81975220298595	1.43736641558904e-06	3.23187340794094e-05
Zfp521	146.465859045008	-0.68280541905893	0.141873198184931	-4.81278654315591	1.4884024060871e-06	3.34217593473229e-05
Thsd7a	4144.41435880855	1.4180951258572	0.294814430031104	4.81012793609724	1.50833722043267e-06	3.38244120906056e-05
Mir221	5.4260472573146	-2.08470885546926	0.433625914670515	-4.80762054328164	1.52737323653355e-06	3.42058680001399e-05
Gm13152	50.9388399938172	1.22796399189803	0.255436056781518	4.80732441367252	1.52963663044739e-06	3.42111842936882e-05
C2cd4b	13.2062091965138	-1.6315082055098	0.339460578953272	-4.80617870428595	1.53842398878573e-06	3.43622056542803e-05
Tmem29	1107.24373186869	0.467546327959322	0.0973205602593461	4.8041886186575	1.55380302823329e-06	3.46598651713968e-05
Glipr2	437.090252592275	0.62865524357847	0.131262362175702	4.78930314187839	1.6736149138881e-06	3.72831945064834e-05
Gm5544	7.42444337834595	-1.81213720723454	0.37860568427987	-4.78634442766313	1.69846481298431e-06	3.77869259974348e-05
Rbm24	355.665488936548	-1.00483818668941	0.210319932052361	-4.77766504051191	1.77342477458113e-06	3.94026983468118e-05
Dusp15	446.375703893393	0.577072268932274	0.120822139583356	4.77621295999436	1.78627222504162e-06	3.96359957845634e-05
Vmn2r29	137.412067264209	0.724353324695853	0.15168504705161	4.77537726213315	1.79370665738115e-06	3.97487278432259e-05
Scrn1	5843.52037195259	0.439831808919939	0.0922008792134406	4.77036458515487	1.83892775234473e-06	4.06974233631627e-05
Rnasel	570.003860866384	0.921902661326412	0.193276021306475	4.76987603063582	1.84339329765599e-06	4.07428523877213e-05
Gucy1b2	26.9287622599977	1.29023607530655	0.270534548291508	4.76921000831395	1.84949774273516e-06	4.08243384102299e-05
Qpct	1136.90166225694	0.749001597992673	0.157065609100548	4.76871800441807	1.85401968648037e-06	4.0870726404579e-05
Vav1	26.2978125562349	1.87624349217917	0.393754944337711	4.76500300290825	1.88850836981668e-06	4.15767305511402e-05
1700029H14Rik	5.39609003395151	-2.20101879252148	0.462251299763466	-4.76151996467665	1.92140285943592e-06	4.22458446411914e-05
Gm5797	16.3512431578242	-1.40691815464566	0.295832329268887	-4.75579581894473	1.97666177035967e-06	4.3404305142124e-05
Idnk	556.093219029971	0.6492352400975	0.136526880760573	4.75536565752253	1.9808755101001e-06	4.34403426799355e-05
9430008C03Rik	341.581169034427	-0.697184245208665	0.14664256801102	-4.75431012062114	1.99125184872134e-06	4.36112564429422e-05
Slc25a37	153.686451634477	-0.82928835142097	0.17463706698242	-4.74863879559115	2.04790321697477e-06	4.47939037847617e-05
Neurod6	2396.26964579033	0.651842142601223	0.137320415946862	4.74686985257503	2.06588786767343e-06	4.51288260459684e-05
Abcb6	1216.41370417078	-0.485171094684727	0.102233299550633	-4.74572469848177	2.07761131257992e-06	4.53262850442177e-05
Arc	2952.43070453811	-0.982553835188655	0.207152375747266	-4.74314538582657	2.10425137487178e-06	4.58482435046256e-05
Crispld2	43.6448534717906	1.16168726074371	0.245063082707768	4.74036010609149	2.13338709478315e-06	4.64231629929231e-05
Nkain3	1408.46116671867	-0.836337750118944	0.176439763694066	-4.74007521098869	2.1363890185115e-06	4.64286550406501e-05
Apobr	9.58210085735227	-1.52493919228146	0.3219589352338	-4.73644004063462	2.17505052060069e-06	4.72081016592073e-05
Poln	21.6592568846385	-1.3314821061524	0.281212711911573	-4.73478633700984	2.19285985818742e-06	4.75335450132897e-05
Dpysl3	78569.398146434	0.476262131218147	0.100695908243517	4.72970689202568	2.24844217984008e-06	4.86546833641207e-05
Erf	741.917549605972	-1.00478405384422	0.212448793156437	-4.72953523960167	2.25034393624175e-06	4.86546833641207e-05
Prlr	20.9898624793652	-1.44696205701226	0.306257495364449	-4.72465842930754	2.30502456412446e-06	4.97054135550115e-05
Batf	4.84518005402152	2.50036757171762	0.529240752517452	4.7244426280933	2.30747344907342e-06	4.97054135550115e-05
Prom1	83.8230701519675	-0.921480776426874	0.195046481426054	-4.72441630164051	2.30777236924843e-06	4.97054135550115e-05
Lyrm9	1614.01407061232	0.571255390299105	0.120966894951905	4.72241095819009	2.33065138069371e-06	5.01342410374447e-05
Pde10a	4602.73089882655	0.610683862658197	0.129323838812461	4.72212910060441	2.33388450455521e-06	5.01399157047318e-05
Glipr1	22.3280666138739	1.58864842305355	0.336490734527561	4.7212248660696	2.3442858654433e-06	5.02993788105154e-05
Rsph4a	480.941779464524	0.788859028525921	0.167119251844895	4.72033604637047	2.35455327718475e-06	5.04555668001797e-05
Tmem145	497.216030743104	0.465852890889889	0.0987281650785758	4.71854096061773	2.3754214457185e-06	5.08382338813721e-05
Podn	25.5868935616605	-1.16424476351167	0.24688130480088	-4.71580772165265	2.40753718653762e-06	5.14603454833851e-05
Inhbb	220.741630594921	-0.841893669669821	0.178706451708322	-4.7110423917091	2.46452960075905e-06	5.26119429057109e-05
Mlf1	324.404708223828	0.885618444491303	0.188063948143521	4.70913459615047	2.48770761171223e-06	5.30396852668846e-05
Rreb1	107.52820592234	-0.936978867304442	0.199155946704731	-4.70474963368082	2.54177683749402e-06	5.41014826908437e-05
Unc93b1	35.6288700335643	1.54431511615967	0.328257951176686	4.70457794129237	2.54391669172865e-06	5.41014826908437e-05
Itga10	43.1414117984191	-1.03893464369477	0.220886961612052	-4.70346749356565	2.55779835415422e-06	5.43010808660413e-05
Fam171b	11159.0777142327	0.460652529360537	0.0979421345255526	4.70331315109694	2.55973352892153e-06	5.43010808660413e-05
B3gat1	2412.18654618749	-0.71621728818134	0.152315592459993	-4.70219283931461	2.5738223896553e-06	5.45314490234874e-05
Ssfa2	451.879091229117	-0.782476716745691	0.166468568485965	-4.70044720070782	2.59592371046476e-06	5.49307866853484e-05
Frrs1l	4124.40676925807	0.5790251006365	0.123280400028069	4.69681393396407	2.64250963128203e-06	5.584658026762e-05
C4a	27.7126896161702	-1.07838737824145	0.229924916425786	-4.69017188308741	2.72975642409547e-06	5.76183337215951e-05
Xlr3c	4.53304659934055	-3.1975267277042	0.681881477171961	-4.68927054737671	2.74180684856231e-06	5.78004375091425e-05
Disp2	3163.69280871374	0.730503028163837	0.156084425341706	4.68017886194981	2.86624749588196e-06	6.03484478995795e-05
Tprgl	2326.52400872496	0.310089666421661	0.0662896827360611	4.67779680974358	2.8997366941998e-06	6.09775265482662e-05
Fabp5	6559.75791525619	0.552159410693892	0.118047234828945	4.67744468130907	2.90471899650523e-06	6.10063245957553e-05
Meis2	3295.07576772486	0.752174182504201	0.16087653770851	4.67547470388164	2.93274427864061e-06	6.15184098001556e-05
Pcdhac1	67.1845202596397	-0.933992798032952	0.199806608741795	-4.67448401188734	2.94693591019855e-06	6.17394041930679e-05
Snhg1	1091.95302932088	-0.642594754721838	0.137525399591428	-4.67255326384009	2.97478336939256e-06	6.22455910477854e-05
Serping1	11.6599740391928	1.58260913736653	0.338813248977084	4.67103675002263	2.99683311505134e-06	6.26293613623228e-05
Ogn	25.8837509621942	-1.36613223870013	0.292629109656632	-4.66847690000197	3.03440887480017e-06	6.3336252484395e-05
Arxes2	3021.38168388835	0.529296694229211	0.113437396575458	4.66598062198233	3.07148648460457e-06	6.40310133074478e-05
Adra2c	238.443819084164	-0.926150285385865	0.198637553424975	-4.66251355504976	3.12370505161152e-06	6.50393138119755e-05
Smr3a	7.77366060867247	1.76940412865865	0.37952009052028	4.6622146570238	3.12824650431604e-06	6.50536582166018e-05
Eya1	138.965121787069	-0.695140271462678	0.149148374042763	-4.6607297995979	3.15090145044304e-06	6.54441843692264e-05
Nek6	1705.77092948395	0.501911516010491	0.107722976168306	4.65928007063514	3.17317221113733e-06	6.58257812742813e-05
Cacna1g	861.215863470325	0.821797734583762	0.176441031406378	4.65763393034697	3.19864330049499e-06	6.62727494136912e-05
BC055402	3.43245567546564	-2.59801278900432	0.557970457514518	-4.65618341260787	3.22124991149823e-06	6.6659345595048e-05
Ptprc	72.8650841441461	1.8356182405926	0.394657931050316	4.6511626808244	3.30068817698047e-06	6.82196090042745e-05
Sh3bgrl	9059.50288270146	0.58456440834467	0.125732526989074	4.64926954339723	3.33112651118794e-06	6.87645504497793e-05
Cited2	758.615051785888	-0.747130542439533	0.160731468091458	-4.64831530073754	3.34657092258415e-06	6.89990190461e-05
Fam46a	524.118254902212	-1.22515846963112	0.263974383303543	-4.64120212839863	3.46388082184162e-06	7.13305994605093e-05
Podxl2	7112.53082939298	0.480917854633065	0.103663844302283	4.63920528772512	3.49751503032267e-06	7.19354918416914e-05
Nrep	11987.0152562382	0.853507715251051	0.184138600989704	4.63513739467791	3.56700479736216e-06	7.32754781122352e-05
Tmcc3	184.192809746946	-0.927563163225011	0.200292750266889	-4.63103712934712	3.63838613369157e-06	7.46510185340411e-05
Mest	2931.76318882094	-0.725965773934811	0.156795989210975	-4.63000219321933	3.6566185962693e-06	7.49340553599555e-05
D630041G03Rik	36.4013982430512	-0.987430403200087	0.213289005766763	-4.62954196654593	3.66475451351421e-06	7.50097511699406e-05
Emx1	271.079427698348	0.904189697566344	0.195442524754928	4.62637135239701	3.72127830533491e-06	7.60744618206845e-05
Slc4a7	2602.8122395988	-0.616413502358802	0.13325045573386	-4.62597669151659	3.72837229488725e-06	7.61273211263193e-05
Cby1	1195.52542280619	0.359231841461793	0.0778274560915383	4.61574692919778	3.91684013015292e-06	7.9878940142225e-05
Lgmn	2232.81971567819	0.388012793458276	0.0841000712886626	4.61370350242002	3.95556594853736e-06	8.05713951833557e-05
Evi2a	19.8665129424778	1.48303047505303	0.321531488965435	4.6123957557776	3.98054188315614e-06	8.09824460710538e-05
Dgkg	2181.29818910259	-0.710737307702287	0.154157089269534	-4.61047436138087	4.01751188576791e-06	8.16362282828843e-05
H2-T24	3.42847092127725	3.46764207820029	0.752712363918956	4.60686212213414	4.08790860061276e-06	8.29668565263788e-05
Pcdhgc3	1465.11320127543	0.654403808920753	0.142068375555961	4.60625953073547	4.09976659487423e-06	8.31076335186631e-05
Ascc2	427.802486707931	-0.39927896741837	0.0867063583327648	-4.6049560274	4.12553024637957e-06	8.35296207918051e-05
D630023F18Rik	573.855235232219	0.526740774363183	0.114437469226097	4.60286982860909	4.16708697269661e-06	8.42699767915628e-05
Trim72	13.965923615805	-1.41591199881353	0.307718075112548	-4.60132866194377	4.19804406650887e-06	8.47944642429052e-05
Slc31a2	201.360683140963	0.596233596558031	0.129593495566855	4.60079878199168	4.20873847411164e-06	8.49089102435473e-05
Ak7	23.7398369332086	-1.1599175817886	0.252188527015073	-4.59940662454985	4.23696050904277e-06	8.53674597435835e-05
Ap3m2	3713.70427541104	0.355929365460766	0.0773897503134384	4.59917965905313	4.24157874717911e-06	8.53674597435835e-05
Ctsz	104.519647428691	1.05518365453765	0.22950950438033	4.59755972802354	4.27468105699054e-06	8.59312670575502e-05
Slc7a7	27.1940218556206	1.38695212045994	0.301892324600846	4.59419470930151	4.34423610671098e-06	8.72256491057331e-05
Slc41a2	2563.20001444463	0.482932641625575	0.105143420042796	4.5930847734362	4.36741540198402e-06	8.75869079310003e-05
Wnt7a	222.90340622841	-0.920768782186406	0.200535608619299	-4.59154754871695	4.39971374670762e-06	8.81299719180367e-05
Aspdh	48.5708477186873	-0.899762673890112	0.196022965625022	-4.59008805943326	4.43059049755181e-06	8.86433070398813e-05
Osbpl8	11598.0269589113	0.382516389692784	0.0833497496154059	4.58929260685004	4.44750627930994e-06	8.87747528942049e-05
Cntnap4	1381.82248026183	-0.789837060929346	0.172104612187696	-4.58928468499121	4.4476750532096e-06	8.87747528942049e-05
Col7a1	91.8845652184987	-1.07424790629057	0.23420990049846	-4.58668870959038	4.50331359678693e-06	8.97791657560144e-05
Cbfb	1724.93397826906	0.505164865995254	0.110170391765825	4.58530516138144	4.53323841636e-06	9.02691791257724e-05
Cd86	8.97659375065634	1.81703010319614	0.396596734936165	4.58155588065698	4.61529239184958e-06	9.17948496216395e-05
Fblim1	95.1912818611711	0.936298606474935	0.204418295367343	4.58030728018934	4.6429327437236e-06	9.22359556594315e-05
Rnf182	671.72020354861	0.782230518279303	0.171185741245233	4.56948407378578	4.88926316732405e-06	9.70153911203689e-05
Olfm4	84.1164401840849	1.19606332157191	0.261781643618165	4.56893502936551	4.90208700249901e-06	9.71556820706552e-05
3830406C13Rik	1572.41012521977	0.490500436202306	0.107449916247252	4.56492153119617	4.99681208203028e-06	9.89169622710004e-05
Sh3bgr	15.3471538057884	-1.32128094136989	0.289492601116892	-4.56412680763604	5.01577562477136e-06	9.91760974237579e-05
Cacna2d1	15527.5317321433	0.660399529401379	0.144742056980033	4.56259599442117	5.05249801327277e-06	9.97853584235368e-05
Fjx1	914.024537415567	-0.723174956546796	0.158594000653563	-4.55991370144271	5.11746467658741e-06	0.000100950360430905
Bcl2a1d	4.09000711641535	2.78217403705619	0.610368878985522	4.55818462055333	5.15976721243099e-06	0.000101666078353687
Rgag1	147.017154236315	0.997959327203775	0.219219066011729	4.55233819466406	5.30529609945648e-06	0.000104411689901424
Helz2	39.2530195799896	-1.11985823948063	0.246033486457985	-4.55164967827202	5.32269103395857e-06	0.000104632084749039
L3mbtl1	161.301419282856	0.826346621162077	0.181618747930542	4.54989713660014	5.36721464095949e-06	0.000105384635380514
Hlcs	247.312687643432	0.637284821008414	0.140112949195765	4.54836490607305	5.40643316321997e-06	0.000106031394185984
Ykt6	3607.10408402753	-0.357348620053421	0.0785828639395052	-4.54741151109631	5.43097429030916e-06	0.000106389132095314
Fcgbp	24.1921195820031	1.21942142011422	0.26819473843826	4.5467760747847	5.44739010440432e-06	0.000106587055970998
Dusp27	3.638286401557	2.44015927009901	0.53690155452499	4.54489142289386	5.49635790787499e-06	0.000107420717167103
Myo18b	58.5031454964447	1.01474398875093	0.223367778687798	4.54292913110462	5.54779065767511e-06	0.0001083005699948
C3ar1	42.9489515221505	1.87425401333618	0.412893864398314	4.53931185455472	5.6438113435579e-06	0.000110047804096211
Rgcc	55.9988846390127	-0.974664258473769	0.214760732213507	-4.53837276688362	5.66899836216366e-06	0.000110411426001725
Atp6v1g2	3551.1278885351	0.464444146296104	0.102413547675937	4.5349873804365	5.76069296998922e-06	0.00011206804319267
Gipr	30.721610910219	-1.21117472404491	0.267240601777896	-4.53215086325662	5.83861262435764e-06	0.000113453179257656
Foxa1	3.04175724869552	-4.36934738036658	0.965589219627924	-4.52505816298389	6.03788982082964e-06	0.000117186494573526
Apol7a	4.45038571826889	-2.23028800557466	0.492900652534305	-4.5248225866762	6.04461902010785e-06	0.000117186494573526
Myo7a	78.8618887963694	-2.79808241935938	0.618695860290716	-4.52254912138025	6.10993010489777e-06	0.000118316834577183
Frat2	359.360732599792	0.771467999765151	0.170653274085201	4.52067505824696	6.16427458127396e-06	0.00011923246343573
Gm13178	2.98852314459688	-2.78576134512772	0.616606430949289	-4.51789213557007	6.2458285551112e-06	0.000120668224868183
Slc4a5	16.3627426754392	-1.20450576668434	0.266631546934873	-4.51749157416303	6.25765172657129e-06	0.000120668224868183
Zfhx2	88.7277374904695	-0.82709011474151	0.183089284516092	-4.51741409622919	6.25994107453086e-06	0.000120668224868183
Rab3c	14385.1229868157	-0.412866916801534	0.091570259637234	-4.50874463430762	6.52123447245073e-06	0.000125561648006617
Snn	5412.3707673436	0.516747602340518	0.114629593346294	4.50797727930024	6.54485827268137e-06	0.000125872980401478
Zswim7	271.473157979346	0.747308325535511	0.165802843062998	4.50721056243629	6.56854418625886e-06	0.000126184797644104
Hs6st1	1370.65461906769	-0.654045804578923	0.145287808670182	-4.50172530348829	6.74040621767905e-06	0.000129339203854237
Ulk3	133.101486276776	-0.635587650661619	0.141199796157844	-4.50133546900528	6.75278270372386e-06	0.000129429612639139
D430020J02Rik	116.5898321647	0.641741108369362	0.14259889569066	4.50032312845879	6.7850241527665e-06	0.000129900133609541
Amz1	200.71620793507	0.849177464655091	0.188940735528199	4.49441176504974	6.97625220820545e-06	0.000133409960122035
Kif26a	65.4060421661496	-0.958330790947668	0.213314619674842	-4.4925696720106	7.03688858234931e-06	0.000134417308372795
Tm7sf2	1064.63907214748	0.681087946055963	0.151619482793041	4.49208725362585	7.0528514995785e-06	0.000134570000476703
Ccpg1	2068.70636796437	0.529812841165442	0.117997882846439	4.49001989175462	7.12165226421751e-06	0.000135729368096588
Erc2	8437.28414133591	0.397160704216209	0.0884675099999299	4.48933969336906	7.14442892757605e-06	0.000136009951376606
Ms4a7	43.6165297727455	2.22927355962991	0.496776707219703	4.48747601735682	7.20719221617169e-06	0.000137050279011571
Rnf32	410.669251504083	0.591283612193874	0.131797443280384	4.48630563292481	7.24687660683643e-06	0.000137497309008306
Gm1653	7.97812564123247	1.5711393285826	0.350208074008815	4.48630241615462	7.2469859657345e-06	0.000137497309008306
BB123696	4.39975703744836	-2.2467138675042	0.501581056593675	-4.4792637958898	7.49009221818233e-06	0.000141950277436843
Dock2	29.2215720616933	1.58025699851382	0.352998019438068	4.47667383808388	7.5814938883795e-06	0.000143521419057373
Ntsr2	33.0224364648731	1.40927211065232	0.314846069841715	4.47606702335784	7.60306255446836e-06	0.000143768549042276
Ncf2	28.9877350194836	1.33504835950814	0.298427193668928	4.47361496482531	7.69081773511173e-06	0.000145265266526954
Gmfg	12.2955310731014	1.33363588295144	0.298204311681335	4.47222199917947	7.74110017462845e-06	0.000145893057879171
Syt17	261.049057638379	-0.703348327712853	0.157270669252289	-4.47221551899522	7.74133482528352e-06	0.000145893057879171
Plvap	102.284553403632	0.823321279959145	0.184136988825314	4.47124331298916	7.77661603120281e-06	0.000146394580047816
Lmo1	896.537083503695	0.622480858076639	0.139227707392436	4.47095531295417	7.78709698892439e-06	0.000146428641152536
Plcz1	10.6999029280662	1.49064407493815	0.333704695361123	4.46695565168787	7.93405692022959e-06	0.000149026123642933
Wnt11	7.50596498321827	-2.20093735859845	0.493039701781721	-4.4640164892296	8.04373700002274e-06	0.000150918381091538
Gm166	140.991142559413	0.644403074279601	0.144377599732822	4.46331754698861	8.07003178935147e-06	0.000151243681237502
Mfsd2a	90.4792118966341	-0.871890545496219	0.195449702099118	-4.46094589110225	8.15986927253863e-06	0.000152679107614275
Ncf1	30.9013194385395	1.63067058388571	0.36555408780491	4.46081890009111	8.16470651283255e-06	0.000152679107614275
Micu2	1190.55277260585	0.497421133695117	0.111546591161455	4.45931272767573	8.22228788223149e-06	0.000153585788915222
Upk1a	14.820816244527	-1.27830993188234	0.286678333595261	-4.45903921601235	8.232785864535e-06	0.000153611958130981
Parp1	1731.73666787422	-0.522062072179751	0.1172459312305	-4.45270950301383	8.47934390459103e-06	0.000158037749638989
Kctd2	715.133635317189	0.358992423478642	0.0806948780805293	4.4487634409756	8.63660728255639e-06	0.000160791345725741
Bpifb6	7.31509267892401	-1.63067962825897	0.367113244684137	-4.44189811147241	8.91687834906781e-06	0.000165826440310968
Btbd3	2097.89876452809	-0.632395911571165	0.142385636056697	-4.44143053390124	8.93627961623481e-06	0.000166004419801695
Hyou1	5466.96197772985	-0.596276005839599	0.13433931096484	-4.438581689582	9.05536155383694e-06	0.000168031687030869
Vmn2r53	3.80418386091513	-2.30858740060488	0.520146656064454	-4.43833940618242	9.06555868138975e-06	0.00016803625015801
B3glct	299.68230231703	0.739662816492848	0.166807758575656	4.43422310094392	9.24048986981953e-06	0.000170992481651565
Stc2	254.45309685707	-0.96479677573366	0.21758516702149	-4.43411096877928	9.24529999691335e-06	0.000170992481651565
Fgfr2	597.970075272004	-0.512540332743315	0.115628007731246	-4.43266595005781	9.30750133361029e-06	0.000171954559649172
Tcp10a	3.12619039140023	-2.87500514427724	0.648778856383295	-4.43141004980394	9.36188656652891e-06	0.000172726222476617
Mvp	42.7636210507298	-0.983535999019342	0.221955551334732	-4.43122955521877	9.36972757246129e-06	0.000172726222476617
Pcdhb19	595.741548680911	-0.838120861753175	0.189156319834097	-4.43083721700795	9.38679308919015e-06	0.000172852113526788
AB124611	11.997201535905	1.63786370767598	0.370266781545685	4.42346921006171	9.71284797566827e-06	0.000178661384441323
Top1mt	224.394270345532	-0.546442835850041	0.123560645907403	-4.42246665058347	9.75804148757944e-06	0.000179297376016612
Cntnap1	183.605629812619	-0.748858681528254	0.169392352411958	-4.42085295389871	9.83120604674171e-06	0.000180445375331827
Bcl2a1a	4.17226575415473	2.58635890163246	0.585067420421423	4.42061685774523	9.84195442160542e-06	0.000180446517223919
Capn11	30.730722225308	-2.57153848554508	0.581893361560186	-4.41926073645214	9.90391013163003e-06	0.000181310218829026
Dnah5	738.194435490379	0.80192061340775	0.181466289786182	4.41911615844813	9.91053724856042e-06	0.000181310218829026
Avil	69.092707042173	-0.9825545132109	0.222372796480913	-4.41850140286938	9.93876352842084e-06	0.000181629827858132
Mrc2	24.2204092570855	-1.17287654181931	0.265652889827729	-4.41507164698981	1.00976541037491e-05	0.000184334040211792
Pycard	15.3361548456295	1.83457232094872	0.415614527513677	4.41411981415482	1.01421780124002e-05	0.000184946887599773
Cpa6	16.5487952569725	-1.38975399467778	0.314872637389294	-4.41370201679211	1.01617804869864e-05	0.00018510445016532
Psd3	24128.8559450365	-0.5142112270563	0.116596602475539	-4.41017333386001	1.03287909484813e-05	0.000187943926676783
Runx2	26.3870009372829	-1.09398336566814	0.248272002111145	-4.40639039587875	1.0510745447021e-05	0.000191048921010115
Srpk1	1544.45759477139	-0.331283394374773	0.0752335584003295	-4.40339924654318	1.065677873266e-05	0.00019349501685989
Cd14	14.519198568556	1.46855497723741	0.33384593311995	4.39890030563818	1.08800789286601e-05	0.000197337285488028
Cpne5	520.617494863619	0.821791480091891	0.186954152016709	4.39568456344551	1.10424192551688e-05	0.000200066836419292
Klhl13	2196.32067223578	-0.720873516142518	0.164176858968433	-4.39083510716406	1.12916147577519e-05	0.000204362493890031
Dok6	723.311758449691	-0.67100771480669	0.152864977509782	-4.3895451118864	1.13588013986174e-05	0.000205358373037531
Mpeg1	63.3564035401706	1.9172724876843	0.437032244103424	4.38702753298581	1.14910248478955e-05	0.000207526679766378
5330426P16Rik	406.460442775132	0.79407439901734	0.181129709095696	4.38400968555528	1.16514589362812e-05	0.000209946434622328
Cst6	12.2987544845604	-1.29496251657632	0.295389391866262	-4.38391679672306	1.16564308285645e-05	0.000209946434622328
Cd180	8.21677917053274	2.35935602290619	0.538197966527576	4.38380701831452	1.16623093495051e-05	0.000209946434622328
Fank1	193.215663630268	0.69034355464727	0.157519908047246	4.38257972090874	1.17282228188639e-05	0.000210908168817184
Kcna4	1839.90022448234	-0.538043741087165	0.122789264460502	-4.38184676364958	1.17677565900798e-05	0.000211330517317434
Msrb1	243.356878065132	-0.703257727685188	0.16049954323749	-4.38168055496945	1.17767391209112e-05	0.000211330517317434
Luzp2	3339.85639123542	-0.517948932222631	0.118252685031648	-4.38001836562115	1.18669306870215e-05	0.000212722920998986
Cml2	7.38206913813545	-1.63351541898551	0.37308729232171	-4.37837324562891	1.19568449540989e-05	0.000214107406039146
Fam71f2	6.71278134155123	-1.72610093921929	0.394685467374189	-4.37335823561709	1.22349706488997e-05	0.000218855629636992
Ybx3	668.82726685043	-0.685797582616651	0.156834878592357	-4.37273640131521	1.22698839003595e-05	0.000219247893694678
Flot2	2078.77315006336	0.449054894993218	0.10277039200073	4.36949676118807	1.24533187004899e-05	0.000222117853238448
Iqgap2	239.828186026457	-1.01061751146864	0.231292458825796	-4.36943563399884	1.24568048689334e-05	0.000222117853238448
Ankrd44	772.861973742467	0.461138870476262	0.10568339532438	4.36339946366091	1.28056804253353e-05	0.000228097805550856
Tmx4	9912.09230921195	0.487632012864747	0.111770718146432	4.36278858140552	1.28415028367465e-05	0.00022849485447977
Mov10	65.4703366838924	-0.885794565294402	0.2030521105892	-4.36240018743995	1.2864328131907e-05	0.000228660047195138
Meig1	63.7017495604897	0.800592321968933	0.183577687905581	4.36105460910206	1.29437053600835e-05	0.000229829031241189
Eif1b	4459.0856150921	-0.421529906635782	0.0966663848852621	-4.36066691783412	1.2966662294904e-05	0.0002299948104115
AW822252	11.1935527210136	-1.581893624413	0.362825533408699	-4.35992916361567	1.30104553639826e-05	0.000230529432608825
Gm6416	2.64367904466102	3.77546223478708	0.866209072228444	4.35860389348518	1.30894780123887e-05	0.000231470776102667
Myt1l	6303.81272844729	0.88540930865269	0.203141761266366	4.35857847806937	1.30909979378211e-05	0.000231470776102667
Rufy4	3.48235934937329	-2.58497847762806	0.593658982930151	-4.35431544363947	1.33483381447892e-05	0.000235543848833568
Ncf4	8.53407603194721	1.85686240818768	0.426443335532649	4.35430045088727	1.33492516483314e-05	0.000235543848833568
Pde2a	5312.83472037084	-0.735473846665074	0.168919935589587	-4.35397896700601	1.33688539130715e-05	0.000235643493920798
Diras2	4501.17457877575	-0.459089472990422	0.105448071171191	-4.35370194913386	1.33857669144937e-05	0.000235695578851034
Ifit2	253.197328870709	0.709097081875892	0.162918347525591	4.35246915185234	1.34612817577907e-05	0.000236778337252139
Dfna5	324.277041142822	0.573967448342065	0.131907681709232	4.35128144854579	1.35344186114143e-05	0.000237817057931678
Skil	4335.46904179326	0.560774160322018	0.128895751290018	4.35060236438878	1.35764056764963e-05	0.000238306846417168
Lhx2	1897.79805230737	0.695078015077526	0.15982535456066	4.3489846588372	1.36769278345843e-05	0.000239822018083895
Kcnv1	908.90201711002	-0.690480473884252	0.15893186307169	-4.34450625909289	1.39589263761182e-05	0.000244512895007399
Sik1	912.903266390717	-0.703391411942965	0.161925185636594	-4.34392839617659	1.39957150032341e-05	0.000244903257559182
Haus8	669.280312392726	0.448053835727949	0.10317937475691	4.34247480936536	1.40886643663002e-05	0.000246274520175306
Tfap2d	26.5943658579197	1.25751708470937	0.28972324781551	4.34040793823399	1.42218443819511e-05	0.000248345464564247
Ado	1570.42488236619	-0.340763165182612	0.0785462551902123	-4.33837570432097	1.4353962614403e-05	0.000250393608168192
Fhit	91.8877418136936	0.847643669065085	0.19540492943738	4.33788273154451	1.43861873873648e-05	0.000250696759776101
Tnfaip8l2	5.70928217742712	2.20792339941961	0.509212312603258	4.33595839058171	1.45126397337523e-05	0.000252639623241383
Pik3ap1	26.3865188649565	2.01044236441662	0.463726117155979	4.33540896239922	1.45489378464492e-05	0.000253010674021773
Dlk1	6.95878687584957	-1.70385688163796	0.393225333995811	-4.33302926930977	1.47071548063663e-05	0.000255435868970402
Slc22a23	1715.112546332	-0.532815383069818	0.122970903589445	-4.33285734687854	1.47186486147223e-05	0.000255435868970402
Gm11201	9.10634933809146	1.4214107265343	0.328169098991317	4.33133628639393	1.482071233048e-05	0.000256943068185303
1500009C09Rik	1937.95584570693	0.440479851227948	0.101836862523404	4.32534781918206	1.52291375065564e-05	0.000263753041985344
Ccl3	11.9232962499939	1.49607573673581	0.346038182942618	4.32344119950456	1.536140942896e-05	0.000265759128968867
Trpm8	76.0541157915418	0.827722863079861	0.19145956492845	4.32322544652803	1.53764461093559e-05	0.000265759128968867
Gm11974	209.16449748048	-0.756849064064028	0.175154632098564	-4.32103367747722	1.5529996650707e-05	0.000268138572028464
Tunar	345.209059542466	-0.643413462757427	0.148992633303778	-4.31842466630941	1.5714684193903e-05	0.000270874944907476
Cdk18	54.9427560440547	1.01096104544397	0.234108606005944	4.31834208358108	1.57205641365229e-05	0.000270874944907476
Ddx39	616.291688485758	-0.488596531466382	0.113237298353321	-4.31480208881239	1.59745951535752e-05	0.000274971471726065
2610318N02Rik	15.8886430590798	-1.24268676147295	0.288047311454969	-4.31417587338677	1.60199379387763e-05	0.000275471152784294
Map2	55630.2962778453	0.478790181125444	0.110993016910034	4.31369643293442	1.60547359845011e-05	0.00027578867938381
Maob	30.1402921880915	1.08602909586771	0.251801620457783	4.31303457814637	1.61028921623355e-05	0.000276334793753249
Cd79b	4.19028214273644	2.53232554034187	0.587325410988541	4.31162264217319	1.62060843799216e-05	0.00027782329019224
Lyz2	113.076613701276	1.66862554259763	0.387303976185663	4.30830986820993	1.64506805525172e-05	0.000281730417657004
Plekhg1	366.187694391232	-0.750882792347553	0.17434904169733	-4.30677900513548	1.65648956008029e-05	0.000283376137614279
Nfia	983.050372064841	0.735730108321189	0.170838889245495	4.30657276906049	1.65803401612524e-05	0.000283376137614279
C1ql2	183.964515519043	-0.943853633296159	0.219433111843425	-4.30132729453172	1.69778072233389e-05	0.000289875887536199
Hhip	37.7411581409592	-1.10193111296839	0.256216079266104	-4.30078828824766	1.70191601131375e-05	0.000290288421889333
Osbpl5	918.535266165842	0.477336105653481	0.111093146300999	4.2967196586563	1.73344191475339e-05	0.000294908774969191
Plekhb2	10947.9643206437	0.242815284456804	0.0565129919302263	4.29662766318576	1.73416113755502e-05	0.000294908774969191
Ttll3	85.9059908161895	-0.774908574752005	0.180353184580265	-4.29661708805113	1.73424383243164e-05	0.000294908774969191
Chst1	968.155276854552	-0.736400011534075	0.171512539569567	-4.29356368567666	1.75827848572274e-05	0.000298695075552457
Prmt2	3143.14861108827	0.318054587562134	0.0741043642299765	4.29198186729029	1.77085412984054e-05	0.000300529073733541
Nr2f1	2812.74348673638	0.564539350213096	0.131547498085708	4.29152479848214	1.77450381021185e-05	0.000300846097783506
Mybpc1	11.9838078696531	-1.33599488231484	0.311344357815705	-4.29105217029711	1.7782852679054e-05	0.000301184804752764
Hn1l	573.550604426624	-0.4458131329392	0.103923295398572	-4.28982867825154	1.78811001860625e-05	0.000302545348438729
Pcdhb16	508.155050994967	-0.816820830869091	0.190634977832127	-4.2847374608682	1.82955106291468e-05	0.000309247239723497
Gnb3	8.41754882521782	-1.43743346293993	0.335559155914365	-4.28369614598378	1.83813903228601e-05	0.000310388156991815
5430416O09Rik	11.1628131635887	1.43510272706044	0.335236063045385	4.28087215326281	1.86162287983629e-05	0.000313908095336902
Trim43a	11.1970977849081	-1.41314315474815	0.330116313857812	-4.28074316665495	1.86270230680786e-05	0.000313908095336902
Phgdh	647.001542092276	-0.701110822273033	0.164063622694533	-4.27340814958364	1.92507605757045e-05	0.000324096054916597
A3galt2	15.9746722608534	-1.31749641148942	0.308782246145264	-4.26674923165633	1.98341891474978e-05	0.000333450346048464
Baiap2	1313.56481927227	-0.696413279191613	0.163223736735212	-4.2666176692264	1.98458840328501e-05	0.000333450346048464
Mtfr1	235.767912740047	-0.629329341807482	0.147576275618807	-4.26443436906521	2.00409239182158e-05	0.00033639268517196
Sp110	19.1520345899184	-1.13943044242194	0.267297996037675	-4.26277210945247	2.01906403097607e-05	0.000338569168093962
Rimbp3	75.6109068483183	0.661701924371361	0.155243945773746	4.26233642203177	2.02300576051469e-05	0.000338893603889396
Rassf4	58.4371443935841	1.53854378022244	0.361080288363769	4.26094647036628	2.03562989679449e-05	0.000340670430498234
Camta1	5180.46568314323	0.653252406792431	0.153324163018668	4.26059659437303	2.03881941758147e-05	0.000340866383022581
Ifngr2	3069.97143627191	0.421567503299019	0.0989549838096997	4.26019475794909	2.04248848819148e-05	0.000341142043636018
Lrmp	17.3590898211904	1.84733266694129	0.43396116901076	4.25690775778946	2.07273823340029e-05	0.000345852349893254
Pcdh17	4775.5014236643	0.595016959544356	0.139822483241895	4.25551703666262	2.08566481674469e-05	0.000347449036784064
Pcdhgb2	156.581569456999	-0.663549487602646	0.155929856451885	-4.25543576260135	2.08642261813953e-05	0.000347449036784064
Cdyl2	536.578386468524	0.527111307516949	0.123885103360268	4.25484011571646	2.09198445076054e-05	0.000348022130590417
Trpm4	119.421133972884	-0.655020341091106	0.153954853438835	-4.25462612226993	2.0939860516396e-05	0.000348022130590417
Arid5b	1240.11778979042	0.709715152296948	0.166837865087855	4.25392132609236	2.10059130554282e-05	0.000348776644890817
Sgcd	83.9624132130977	-0.868503038539302	0.204206122403304	-4.25307051677922	2.1085914020231e-05	0.000349611521917191
Larp1b	366.084702598938	-0.514973700204745	0.121088641750004	-4.25286544437374	2.11052401634182e-05	0.000349611521917191
Slc8a3	1104.66887933383	0.485371347915795	0.114131793962707	4.25272687884318	2.11183082053497e-05	0.000349611521917191
Samd4	733.466696651751	0.479120221399195	0.11281581200254	4.24692437074697	2.16725075631223e-05	0.000358434831254539
Sec14l3	428.181139119665	0.647648162081336	0.152576237211175	4.2447511743585	2.18836118863959e-05	0.000361109038198371
Acnat1	4.48839185830133	-1.87853027761788	0.44256667686852	-4.24462657448554	2.18957746570914e-05	0.000361109038198371
Hs3st4	97.463807984458	-0.875739812003557	0.206318566023503	-4.24460012921859	2.18983569297129e-05	0.000361109038198371
Vbp1	3613.57718076988	0.436966236447092	0.102960992519611	4.243997904001	2.19572402935512e-05	0.00036172678985064
Bpifb2	3.95380510294219	-2.0941142081033	0.493776349243909	-4.24101764150894	2.22508645106254e-05	0.000366206723320098
Cd244	6.69122221794277	2.14595824500354	0.506140832511161	4.23984414447776	2.23675032321091e-05	0.000367581252150621
Rangrf	134.325771763794	-0.80147355582127	0.189038389923277	-4.23973964307756	2.23779182287598e-05	0.000367581252150621
Itgam	16.6120843166819	1.55392891929004	0.366593928361076	4.23882884868595	2.24688869960283e-05	0.000368716837526661
Plcg2	41.7238697091848	0.87257295389329	0.205885425988419	4.23814823076583	2.25370957418644e-05	0.00036947708611371
Igip	1123.58819699968	0.550291779994422	0.129916464112093	4.2357355070842	2.278047997098e-05	0.000373070486327186
Soga3	3344.03859180096	0.526076342642274	0.12420530503154	4.23553842976906	2.28004703239166e-05	0.000373070486327186
Clec4a1	10.4919925708313	1.91117210920907	0.451564168810807	4.2323378186585	2.31274677088466e-05	0.000378054617358745
2610002M06Rik	3814.17885772796	0.37736956414679	0.0892073647004928	4.23025122885068	2.33430465426867e-05	0.000381209558916643
St6gal2	1116.71411266613	0.527995090903279	0.124837116817781	4.22947200610192	2.34240422898482e-05	0.000381835589276112
Areg	28.6575530264799	-1.36887658619537	0.323653768990484	-4.22944738281609	2.34266060932164e-05	0.000381835589276112
Hcn1	1569.85025034754	-0.646601171086294	0.152893561752469	-4.22909351888295	2.34634802965836e-05	0.000382067818985642
Cldn15	7.98993087457306	-1.47543504067579	0.349076840164628	-4.22667696883	2.37167759555224e-05	0.000385820307114597
Ctps2	1536.16695587127	0.419029374283615	0.0991964104628244	4.224239287778	2.39749211975873e-05	0.000389644388202559
Slc11a1	17.0625296902143	1.57997845289803	0.374084562931708	4.22358634773835	2.40445187765453e-05	0.000390399753904562
Polr2m	4978.75275983768	0.218024825756115	0.0516520532751221	4.22102921242678	2.43189415561076e-05	0.000394476125952385
4833403I15Rik	7.3361395059348	-1.65038505826766	0.391026773286799	-4.22064464894629	2.43604684268856e-05	0.000394743590799847
4933413G19Rik	4.57312246284815	1.98855581609884	0.471172206718874	4.22044379473622	2.43821843659979e-05	0.000394743590799847
Cxcl16	8.50897662789114	1.71258252111306	0.405898526186214	4.2192380869286	2.45129305905366e-05	0.000396480216428928
Sbk3	17.9634462315731	-1.16480269456045	0.276103835456747	-4.21871247327501	2.45701363370382e-05	0.000397025188695911
Nov	3609.82790804458	-1.07142654104631	0.254115953461731	-4.21628995130236	2.48354397717001e-05	0.000400928523886165
E130307A14Rik	485.373278844881	0.427192548642613	0.101350702944365	4.21499344584828	2.49785443167416e-05	0.000402853581024354
Aoc3	3.36816856063328	-2.12724696216174	0.50475363425608	-4.21442624241218	2.50413969385292e-05	0.000403481897618324
Clec4n	2.67063932052467	3.12669959133855	0.741988252912508	4.21394756462167	2.50945569344627e-05	0.00040395299179727
1700028E10Rik	10.9873013470062	1.34478243200262	0.319163436090606	4.21346018978457	2.51487930715854e-05	0.000404356725888925
Asb11	2.35663855790881	-2.99420477906895	0.710684881752147	-4.21312575509828	2.51860741818577e-05	0.000404356725888925
Dnajc6	13290.3385595684	0.413989869832769	0.0982630598462208	4.21307733018545	2.51914767046754e-05	0.000404356725888925
Itga9	109.199193317331	-0.746361510278254	0.177196489601657	-4.21205584803682	2.53056955105975e-05	0.000405804344151898
Ankrd23	39.7759312830936	-0.903279412290039	0.214510076644574	-4.21089501444122	2.54360941030025e-05	0.000407418236390384
Trem3	13.2901394255395	-1.30524760351251	0.309981251462363	-4.21073080179814	2.54545919336643e-05	0.000407418236390384
Nrip3	5466.40668954815	0.522924950785755	0.124233933552024	4.20919579566219	2.56281235374654e-05	0.000409807286035645
Nub1	3834.03247745181	0.281902528673613	0.0669813562253579	4.20867155518851	2.5687645970897e-05	0.000410370472908767
Fam117a	27.7539642522759	-0.949054017458733	0.225654187447054	-4.20578952332276	2.60172282838247e-05	0.000415242832514806
Abhd5	1431.5294655769	0.472073118183765	0.112290934228305	4.20401808416669	2.62217973572372e-05	0.000418087016736761
Gm2061	84.2855021964514	0.722134241515339	0.171780550319123	4.20381841933679	2.6244950713074e-05	0.000418087016736761
Fam155a	1616.37798752008	0.499556810821956	0.118906652134775	4.20125200611764	2.65442912845464e-05	0.000422457024157258
C2cd4a	10.3870038046465	1.44074378457628	0.342984865550202	4.20060454348357	2.66203211413659e-05	0.000423268119390871
Ndrg3	10229.6239955484	0.422574010722473	0.100611335879792	4.2000636113942	2.66840001320245e-05	0.000423881492219535
H2-DMa	614.599506326205	0.67658791806376	0.161143853255323	4.19865793448384	2.68501556321627e-05	0.000426120045117198
Tnc	1159.59719993686	-0.921987421259043	0.219677191977942	-4.19701022649461	2.70461725217228e-05	0.000428827858405457
Pawr	36.7674047595817	-1.03135284343451	0.245787631786338	-4.19611367723766	2.71533998999456e-05	0.000430011295882652
Tube1	100.021382475986	0.693531878542645	0.165285601409428	4.19596064405333	2.71717430242088e-05	0.000430011295882652
Eid1	14808.1779612484	0.390727462013525	0.0931623056959167	4.19405100694766	2.74016323535444e-05	0.00043324341191194
5830403L16Rik	31.8938007626147	1.0506770866616	0.250796095663914	4.18936779649709	2.79732694609287e-05	0.000441867753149898
Rag1	27.3376737064215	1.3178923496696	0.314643363003161	4.18852740795412	2.80770405848264e-05	0.000443092436743345
9330159F19Rik	4001.07208320233	0.716998498773717	0.171213854882199	4.18773643795963	2.81750437610786e-05	0.000444223892576632
Tle1	2480.22434593782	-0.484069077734174	0.115600782333543	-4.18742043057711	2.82142887199384e-05	0.000444427685937388
Grin2d	115.199650527713	0.846279058491663	0.202140565103362	4.18658698247395	2.83180440801078e-05	0.000445646311590587
St8sia5	448.695168220549	-0.619303028388653	0.147940591116442	-4.18616029390615	2.83713025222634e-05	0.000446068728483184
Nfam1	8.06342189085917	1.88535568211247	0.450431253655708	4.18566799441844	2.84328687043803e-05	0.000446620856690386
Acrbp	46.7392084549799	-0.799673889436004	0.191150793424195	-4.1834714630841	2.87091142330775e-05	0.000450540987862218
Kcnh1	769.432358482516	-0.63132002801563	0.151135683694198	-4.17717386512782	2.95153417050077e-05	0.000462763286936639
D930028M14Rik	15.116770064466	1.15738738839867	0.277109250583095	4.17664652465873	2.95838202935342e-05	0.000463406669273301
Cd81	5759.07554414789	0.266775499160477	0.0638867304448684	4.17575758381772	2.96995969959185e-05	0.000464789059196552
Spi1	13.5143737184226	1.76620713598335	0.423132546859849	4.1741226220737	2.99136616325222e-05	0.000467705639191454
Tmem65	4474.01233334582	0.373334036311139	0.0894594635891117	4.17322015282661	3.00324487155994e-05	0.000469128518974664
Stxbp2	318.835050994641	-0.481870852790337	0.115522954960993	-4.17121301089503	3.02982471196826e-05	0.000472843069189427
Ksr1	364.840561259591	-0.62284945654094	0.149421506282593	-4.16840568694963	3.06737631948618e-05	0.000478261463812037
A730056A06Rik	73.8518611559975	-0.892179030995259	0.214465789705019	-4.16000627523103	3.18238850569479e-05	0.00049573627589633
Arhgap4	99.2363467443467	-0.966059654993856	0.232315609369231	-4.15839322039893	3.20493984373274e-05	0.000498789070979457
Btk	3.46500170308095	2.62524652925467	0.631817145421061	4.15507326491613	3.25183326232052e-05	0.000505621146109984
Tmem241	156.253410241714	1.03584707881421	0.24939850630558	4.15338124577627	3.27598259096312e-05	0.000508907470386414
Mill2	3.1371854256619	2.35132758897723	0.566595040809626	4.14992617234585	3.32582527063664e-05	0.000516140052928706
Egr3	915.170048437287	-0.938030220999093	0.226046000037785	-4.1497315627894	3.32865401894682e-05	0.000516140052928706
Me1	1618.0417308309	0.564139939994528	0.135999423170259	4.1481053878315	3.35238079607415e-05	0.000519342221307413
Hspa5	20303.5223103752	-0.549927488015803	0.132587028255428	-4.14767187447909	3.35873306149937e-05	0.000519849371920058
Gng2	38865.3282912565	0.473322754115376	0.11414078737893	4.14683274037718	3.37106138066294e-05	0.000521279692984198
Tmem132e	282.958720889688	0.793049636785778	0.191270525207813	4.14621978961024	3.38009383087083e-05	0.000522198210686961
Slc35f6	695.279898608764	-0.55854811149269	0.134723674626322	-4.14587943093086	3.38511928200059e-05	0.000522496564861627
Cybb	32.6084738755845	1.76042896374682	0.424724533688823	4.14487232102445	3.40003102420372e-05	0.000524318939495014
Fbxo2	341.172032806877	0.563272554496683	0.135948623304056	4.14327516386023	3.42380728212653e-05	0.000527503738740772
Atp9a	18774.1029099532	0.424946690304463	0.102586329127293	4.14233254976082	3.43791362444522e-05	0.000529194252163919
Pcdha6	196.632355066061	-0.805743810306063	0.194541670348357	-4.14175435454652	3.44659368609618e-05	0.000530047185641348
Bcl2	881.915132840234	0.73935318040446	0.178544027129749	4.14101324076872	3.45774997630375e-05	0.000531279036395496
Olfr212	2.67523183414655	-2.50420410180666	0.604825511420099	-4.14037446258991	3.467393278267e-05	0.000532276389971059
Impg2	65.5582477522644	0.930874259272942	0.224883191238404	4.13936788315185	3.48264093779477e-05	0.000534131470259787
Gm14446	55.8125607651128	-1.025092063849	0.247886572262403	-4.13532711551588	3.54449375181087e-05	0.000543124514456246
Rdh13	788.361578502559	-0.411117701180036	0.0994366549838369	-4.13446833309972	3.55777303709546e-05	0.000544665054436935
Kcnk13	56.2051539514598	-0.97063792645686	0.234957275204252	-4.13112522526945	3.60991853530928e-05	0.000552147503507541
Tmem229a	502.69713308581	0.581709668355931	0.140820750444986	4.1308519271326	3.61421335189616e-05	0.000552304132670756
Arhgap12	2160.95516975061	0.399149920869895	0.0966333979279842	4.1305586829034	3.61882701223182e-05	0.000552509158485954
Als2	1779.22941645025	-0.271373985019065	0.0657070977592902	-4.13005587331235	3.62675081666759e-05	0.000553218737942628
Proser2	20.7268473390221	1.15052052630467	0.278588461149111	4.1298211762219	3.63045505799148e-05	0.000553283972105091
A630001G21Rik	7.30275740291575	1.68077115566053	0.40714188739411	4.12821968876309	3.65582750496819e-05	0.000556648361126175
Fosb	1661.33604774677	-1.00287182588354	0.242967053566125	-4.12760417992478	3.66562375754842e-05	0.000557637142071735
Snca	10541.5739846453	0.548386322312247	0.132895093283645	4.1264602684901	3.6838961437471e-05	0.000559912423792201
Efcab1	308.791945745557	-0.465075835578658	0.11271593754782	-4.126087629634	3.68986717893766e-05	0.000560315622154148
Lrrc4c	4253.22093716928	-0.51486361910013	0.124797195833943	-4.12560246774468	3.69765501420551e-05	0.00056099373378144
Cyth4	49.4920068398624	1.67436013769443	0.4059904837057	4.12413641426177	3.72128309050988e-05	0.000564071690003141
Clec4a2	28.4377783017435	1.92723940208768	0.467388861840548	4.12341747832487	3.73292234368606e-05	0.000565328490542447
Rimklb	4015.23187038738	0.282457299965498	0.0685085434513177	4.12295001084372	3.74050896748753e-05	0.000565969842517871
Serpina10	9.36201157596743	1.39492223446722	0.33836544436748	4.12253159324471	3.74731196322055e-05	0.000566491582909061
Zbtb7b	50.3216643454493	-0.970983442326015	0.235589388744882	-4.12150754114603	3.76401147622889e-05	0.000568507135846163
Hspb3	95.0200366043313	1.08749941713164	0.263991012551698	4.11945621413407	3.7976757910347e-05	0.000573079118922359
Fstl4	75.2332664596887	-0.943850249464644	0.229258669192209	-4.11696645012506	3.83891930556735e-05	0.00057848626103042
Gucy2c	6.23937836138765	-1.86084511538515	0.452003733021369	-4.11687997120409	3.84035946118145e-05	0.00057848626103042
Stard10	385.317695244115	0.728745472175851	0.177081064325062	4.11532127928776	3.86640484380428e-05	0.000581890482998922
Slitrk2	2522.42116423468	0.626387074834525	0.152243261084241	4.11438293145813	3.8821651764957e-05	0.000583742129744492
Ssh3	221.586035150979	-0.629855726716	0.153102728114212	-4.11394189035049	3.88959387649134e-05	0.000584338809594598
Foxn2	412.839724703853	-0.517961647085817	0.125938305091223	-4.11282053312241	3.90854232797581e-05	0.000586663517779551
Agbl4	58.6472015074935	0.826328784548195	0.201060891673646	4.10984342936994	3.95927476999756e-05	0.000593637635904547
Cd84	23.0038672730712	1.18293931774571	0.287846408471951	4.10961986298668	3.9631096576973e-05	0.000593637635904547
Creld2	556.109802190147	-0.80264124985037	0.195314670200769	-4.10947753707039	3.96555284437007e-05	0.000593637635904547
Hsd11b1	169.086029735285	-1.0279492878157	0.250314781820537	-4.10662638594267	4.01479828797493e-05	0.000600477270954337
Akap5	1674.45115257232	0.611732030237336	0.148971322840821	4.1063744254388	4.01917798009138e-05	0.000600600348423213
Cryl1	505.304001885085	0.597049665805363	0.145435909781364	4.10524241710948	4.03891106967034e-05	0.000603015493567227
Parp11	1239.00517697006	0.409755559367273	0.0999092209114584	4.1012786970925	4.10873339894672e-05	0.000612898164086699
9130024F11Rik	678.062485390972	-0.511560217805716	0.124823302489714	-4.09827498233249	4.16240611349151e-05	0.00062035648395779
Kcnab1	183.468074173506	-0.794517932530795	0.193970193878414	-4.09608258178481	4.20200089668228e-05	0.000625705353980397
Shisa9	1127.84460438125	-0.585827937000311	0.143135787963025	-4.09281246386572	4.26172387979356e-05	0.000634039378274838
Lrrn4cl	60.5364972056386	-0.77689314793317	0.189847458017649	-4.0921967354493	4.27305879855508e-05	0.000635166116834517
Zbtb18	19857.2215016204	0.60404964992054	0.147618584666794	4.09196207431472	4.27738618788697e-05	0.000635250159794718
Plcl1	779.361983079139	-0.600048530782016	0.146666097680065	-4.09125585444397	4.29043469620945e-05	0.000636628121970059
Arhgdib	237.262603377713	0.885763208368213	0.216620875788138	4.08900206476183	4.33232997283296e-05	0.000642280280256868
Phf20	3551.11829560583	0.384392455279205	0.0940402549722268	4.08753097694949	4.35988475472693e-05	0.000645555283833031
2310015A10Rik	93.2291108776435	0.745239197906069	0.182331066188281	4.08728591065501	4.36449118744245e-05	0.000645555283833031
Dbpht2	1966.64550516329	-0.867994225760097	0.212368313602899	-4.08721155729066	4.36588969641905e-05	0.000645555283833031
Gm8773	82.5865736367626	0.812287346254964	0.198816210002716	4.08561930762018	4.39594046179367e-05	0.000649430014329377
Rcc1	327.991435462964	-0.561386059128572	0.137443647364783	-4.08448167588731	4.41753120942344e-05	0.000652049230789547
Txndc16	4039.99844133799	0.437592155289586	0.107243546850928	4.0803588480513	4.49662282772727e-05	0.000663143869598277
4930577N17Rik	14.225336722145	1.0947333920006	0.26837623695854	4.07909956711152	4.52104718339997e-05	0.000666164072765199
Prdm16	68.0552218649093	1.03501878102206	0.253898320155144	4.07650897567819	4.57168916189712e-05	0.000673038737469876
Pgr15l	65.0421228684699	-1.13689046413582	0.279086179157298	-4.07361793252772	4.62883953155777e-05	0.000680858748518158
Bin2	5.16670728116512	2.25687510701131	0.554131573749818	4.07281449735664	4.6448418015169e-05	0.000682617916974886
Rgma	277.52836063406	-0.998124781757235	0.24520456333942	-4.07057996051892	4.68962406544268e-05	0.000688599930165784
Gm15706	103.833163056783	0.587031743136449	0.144271173516641	4.06894689235157	4.72261092295293e-05	0.000692841077714884
Tmem206	499.893138140527	0.420592449580244	0.103383170989103	4.06828737749374	4.73599493576253e-05	0.000694201479906997
Actl6b	2402.47416366193	0.28857090869092	0.0709390226183245	4.06787263257808	4.74443006596012e-05	0.000694834744959259
Rpusd4	147.07261490303	-0.663055122648896	0.163009819204879	-4.06757780533167	4.7504349565805e-05	0.000695111305691667
Tfpi	56.9645051085057	-0.814385537983892	0.200285440042217	-4.0661245161517	4.78014026265259e-05	0.00069885236775023
Wdr74	775.399843125697	-0.378216263861926	0.0930232918565957	-4.06582326117831	4.78631992759947e-05	0.000699069014896776
Ucp2	22.5601074277469	1.18936970549553	0.292541181518827	4.06564880650484	4.7899019912091e-05	0.000699069014896776
Mnd1	57.4581188583455	0.808905678379357	0.199055924236164	4.06371064555534	4.8298694448309e-05	0.000704293397628796
Rps6ka2	1606.94462378221	-0.339198988925367	0.0834887231074942	-4.06281203377177	4.84850710190281e-05	0.00070640112961804
Ifi27	279.177723133397	0.905427903984622	0.222900535437752	4.06202659947165	4.86485322407467e-05	0.000708171651221766
L3mbtl3	1157.63759462082	-0.687604071064255	0.16931126071824	-4.06118333858805	4.8824609576082e-05	0.000710122616108287
Gprc5b	393.550980762438	-0.601321321847234	0.148111420358521	-4.0599254290565	4.90883909195868e-05	0.000713344723810794
Shmt2	559.475273273899	-0.757737643036399	0.186793870929047	-4.05654446405377	4.9804084635902e-05	0.000723122762821875
Cntln	468.812061194149	0.4071270912214	0.100371374498964	4.05620719307378	4.98760193004679e-05	0.000723545070367441
AW011738	40.1671660159777	-0.87134652957202	0.214882740366693	-4.05498611980228	5.01372798668441e-05	0.000726222085630094
Slc16a9	151.321932386938	-0.682158235529153	0.168228817514866	-4.0549428189904	5.0146568272219e-05	0.000726222085630094
Vrk1	418.576753826466	0.382950070857231	0.094506073004741	4.05212129423704	5.07553383698618e-05	0.000734408435058685
Arhgap30	14.9389038970373	1.8059906064452	0.446207166650654	4.04742626614769	5.17838866090052e-05	0.000748649579862725
Plce1	428.322648235448	-0.818975502862622	0.202370459654517	-4.04691230261948	5.18976734399033e-05	0.000749652791878706
Katnal2	126.754279944362	0.583522884331881	0.144289447254528	4.04411338067254	5.25214994310848e-05	0.000757432784219268
Cckbr	77.0234249634532	-1.23329049576473	0.304960935288782	-4.044093367555	5.25259854507143e-05	0.000757432784219268
Kctd12	2619.3697126246	-0.980508226142146	0.242552784360261	-4.04245298081513	5.28949217419375e-05	0.000762102089193137
Il1rapl1	463.123545049585	-0.546963789531411	0.135462820229364	-4.03774104662296	5.39683791277807e-05	0.000776905413428564
Adcy5	2714.47392516106	0.460433448264026	0.114044424081661	4.03731661562283	5.40660783852388e-05	0.000777648892345095
Tmc4	50.7269305015403	-0.730456610427018	0.180949553789847	-4.0367969698083	5.41859232099119e-05	0.000777923510891486
Fgfr1	1082.14728931125	-0.392733858461773	0.097290147791195	-4.03672794602658	5.42018609432943e-05	0.000777923510891486
Snx31	2.37974193228541	-2.84380472130142	0.704498888703078	-4.03663478665896	5.42233786757834e-05	0.000777923510891486
Tfr2	31.3505543541914	-0.949917977489628	0.235384799830713	-4.03559608850191	5.44638435767338e-05	0.000780710070150023
Inhba	117.051826895136	-1.09230696293943	0.270741616624772	-4.03449967004255	5.47187669998085e-05	0.000783698981814051
Irak3	7.67672954153162	1.60984679351031	0.399057185290185	4.03412556608816	5.48060066190623e-05	0.000784283243872445
Pla2g3	22.8757824586385	-0.963377643276249	0.238858238047696	-4.03326111399967	5.50080978641114e-05	0.000786508671069759
2610203C22Rik	5.43179688774731	1.66652869567855	0.413226029948066	4.03297124309425	5.50760216713467e-05	0.000786813622624671
Rnf150	1746.93681409174	0.57347810650362	0.142241669956913	4.03171663182339	5.53709248726821e-05	0.000790357935249458
Grasp	252.611926085323	-0.79765184081215	0.197894608635329	-4.03069010476191	5.5613327694829e-05	0.000793147509674732
Sytl1	13.9006888662133	-1.1847134108869	0.294318353479377	-4.02527873943789	5.69078667388897e-05	0.000810925095150119
Psph	809.316811748297	-0.627585499605564	0.155918993512682	-4.02507408152629	5.69573820158042e-05	0.000810946334501577
Park2	549.131740181215	0.67750996636304	0.168444407831311	4.02215766665007	5.76674333840788e-05	0.000819920118423797
Pfn2	13600.4528079022	0.279925761111733	0.0695971445479375	4.02208686764331	5.76847744100125e-05	0.000819920118423797
Sh3d19	670.747205443421	-0.808613948290601	0.20105378500473	-4.02187876379237	5.77357745464121e-05	0.000819954826737355
Nabp1	415.360892833366	-0.657871694932029	0.163589712235108	-4.02147351409573	5.78352119124543e-05	0.000820534387372936
Fendrr	2.04977258605823	-3.17389147007436	0.789266755083785	-4.02131655695726	5.78737685278436e-05	0.000820534387372936
2610018G03Rik	29.9059850633697	0.908922100557214	0.226060759458436	4.02069825269402	5.80258923128969e-05	0.000821445780938109
Casd1	3227.82861178923	0.378558076658632	0.0941532204251255	4.02065988767402	5.80353438741658e-05	0.000821445780938109
Kcnc4	603.932990851759	0.544564299837787	0.135577477241873	4.0166280632754	5.9036788380864e-05	0.000834589953764217
Msantd1	252.464810651731	0.614887775105663	0.153089528078536	4.01652407465923	5.90628328051782e-05	0.000834589953764217
Galns	386.951290049304	0.594640589215431	0.148076711671749	4.01576036165367	5.92544418760577e-05	0.000836597412641397
Car6	13.4379510944851	-1.39776286391513	0.348095570159949	-4.01545720123028	5.93306653259727e-05	0.000836973780028717
Gpr31b	6.15076059920318	2.01394595396024	0.501913177320803	4.01253851255834	6.00692750015542e-05	0.000846685957993526
Lrrc58	8742.90631251717	0.454617075882307	0.113375018467473	4.00985227634371	6.07567466108361e-05	0.000855661737506738
Fam163a	82.613061154024	-0.899320162366875	0.224357254407243	-4.00842916687895	6.11239662188001e-05	0.000860116077975549
4930507D10Rik	1.06759239456814	-5.78077685199307	1.44237099472292	-4.00782938172128	6.1279363591787e-05	NA
Impg1	3.87081044347736	-2.55302095432358	0.637039975135517	-4.00763068876561	6.1330925058804e-05	0.000862309742333859
Eif4e3	380.344637173705	0.435814613494879	0.108773525417872	4.00662396314381	6.15928055459247e-05	0.000865260453464105
Npas2	172.362613320104	-0.709764313894075	0.177156281278644	-4.00643041709432	6.1643274044612e-05	0.000865260453464105
Insc	36.0586561874678	1.10360026457176	0.275553749478686	4.00502721033422	6.20103427121074e-05	0.000869689906176616
Ahrr	22.4877988407437	-1.04077077685693	0.259921725166449	-4.00417000999219	6.22355972483649e-05	0.000871687925351192
Ppapdc1a	53.1320233234059	-0.981178774689221	0.245043993566566	-4.00409232810959	6.22560486778123e-05	0.000871687925351192
Tex11	20.2653830923501	-1.10497057133826	0.276036479984725	-4.00298747252323	6.25476153609757e-05	0.000875044766350816
Lingo4	16.5889430150339	1.14373585303686	0.285901399199163	4.00045559847057	6.32206490271771e-05	0.000883728377047113
Caln1	1788.78468367579	-0.747320754116299	0.186901498796156	-3.99847384279867	6.37522248193925e-05	0.000890421892721474
Fam184b	597.629203410181	-0.64684132132885	0.161821568366263	-3.99725035333241	6.4082516603023e-05	0.000894206292961076
Slc30a10	316.168103955025	0.780107649238643	0.195169468392316	3.99707831181117	6.41290904166684e-05	0.000894206292961076
Snx4	3327.01353554533	0.322243772187448	0.0806311327258528	3.99651798621113	6.42809998399342e-05	0.000895175778567388
Pnmal1	1639.9183607916	0.2878858705471	0.0720357435803132	3.99643088609384	6.43046440484568e-05	0.000895175778567388
Aff1	350.182946543579	-0.603628347194635	0.15109147601759	-3.99511847461443	6.46619094403584e-05	0.000899041164653095
Atp6v1a	25603.6181310698	0.292048615790549	0.0731031676895321	3.99501998368763	6.46887963433324e-05	0.000899041164653095
Fyb	42.8722005300936	2.10467764940908	0.526877305766641	3.99462574374244	6.47965253513541e-05	0.000899797801877438
Pcdh8	5389.5215966098	0.781944666451249	0.195835484928351	3.99286506598808	6.52797196172135e-05	0.000905762814672364
Skap1	24.5807872226307	0.956433120158612	0.239557334699736	3.99250192592691	6.53798018186099e-05	0.000906406677757838
Scnn1a	13.6508731491151	1.23411439171059	0.309300847150368	3.99001296983391	6.60696823462669e-05	0.000915219570220724
Baat	6.32677554757517	-1.42692431188663	0.357700654969707	-3.98915767153814	6.63083373851934e-05	0.000917772610726537
Lsm11	4096.22918194448	0.446553329132888	0.111976586945257	3.98791695045319	6.66559879849379e-05	0.000921828839568928
4833423E24Rik	2.90357098780862	-2.40026759311541	0.60202473994039	-3.986991619901	6.69163881767984e-05	0.000924672774757297
Lrrtm4	849.632589167013	-0.632305305671491	0.1586671783479	-3.98510462122842	6.74504006343653e-05	0.000931289832470885
Rnd3	652.671436396574	-0.685836262925433	0.172206658806326	-3.98263497869013	6.81553930972828e-05	0.000940114867325099
Col28a1	83.008022339654	1.16193137306522	0.291761024156402	3.98247633118518	6.82009186588444e-05	0.000940114867325099
Id1	14.7086791037334	-1.20929821579766	0.303945112492004	-3.97867301067218	6.93009734873113e-05	0.000954499378716753
Galnt16	2174.02782253265	-0.549906227524363	0.13824457298666	-3.97777804686355	6.95622576399241e-05	0.000957317263657505
Cd69	15.5659228459834	2.27964326154568	0.573221626755973	3.97689681466982	6.9820443324827e-05	0.000960087952754909
Lgr5	24.2748086698648	-1.22263103353706	0.30759460501959	-3.97481299601855	7.04345771561972e-05	0.000967744727306383
Stk32a	14.5272645843648	-1.19840052909768	0.301518918753793	-3.97454506022636	7.05139117801156e-05	0.000968047084812222
Dis3	1013.45755828788	-0.367588544600952	0.092523390946089	-3.9729255579828	7.09952419763417e-05	0.000973863246151507
2610528A11Rik	6.96349311522908	-1.49890542390292	0.377332118635893	-3.97237698535092	7.11589860591928e-05	0.000975317076782085
B230216G23Rik	26.3755307219667	-1.048309686142	0.263925305638484	-3.97199383214106	7.12735657408862e-05	0.000976095240146475
Nup210l	48.1208813271453	-0.900046498567765	0.226661088088601	-3.97089110511965	7.16043044070159e-05	0.000979830052039604
Tbr1	621.441265535353	0.689843271397936	0.173774038077339	3.96977177391087	7.19415075268169e-05	0.000983647203318081
Spcs3	1536.28836932915	-0.609412627801468	0.153538876692721	-3.96910958923512	7.21416999494373e-05	0.000985586363548705
Col5a1	210.918663147144	-0.635321919137295	0.160215071373163	-3.96543167688352	7.32632361926917e-05	0.00100009943924801
Hint3	469.227142639377	0.366398964075451	0.0924034932913322	3.96520684472674	7.33323282439186e-05	0.00100023400220259
BC035044	8.55226318149562	2.03969670140923	0.515139296603596	3.95950515687175	7.51052227868619e-05	0.00102358901693216
Pparg	27.6833798136455	-1.19336472204216	0.301494607768023	-3.95816273755837	7.55284929420968e-05	0.00102795869725081
D030018L15Rik	3.34927359249036	-2.11242427034876	0.533696227042965	-3.95810231234538	7.55475982049189e-05	0.00102795869725081
Ms4a6b	9.22579756540165	1.92783337682482	0.487103017201119	3.95775289568538	7.56581665259656e-05	0.00102863429948265
Zeb2	8216.6773004043	0.547090273977767	0.138274213255506	3.95656038170215	7.60366753599414e-05	0.00103294875311985
Spon2	10.0788887070112	-1.34255871384618	0.339346084496954	-3.95631119727337	7.61159933676505e-05	0.00103319506752906
Rad9a	143.919863804508	-0.662011285471178	0.167341540274743	-3.95604871560452	7.61996286351499e-05	0.0010334995414724
Dtx4	3361.91897784223	0.488679206477558	0.123583936719962	3.9542291615527	7.67817917404854e-05	0.00104055965917322
Ccdc24	48.6251255965306	-0.829118775100894	0.20975125391694	-3.95286683448967	7.72204162710503e-05	0.00104566475473373
Ttc30b	740.843991272236	0.42092954818134	0.106557115146215	3.9502716229109	7.80625523950481e-05	0.00105622136197338
Col9a1	15.9803555078171	-1.18055634502553	0.298948472535259	-3.94902952677335	7.84686732136554e-05	0.00106086630575323
Cmas	3368.71610903315	0.331299027886059	0.0839301251561296	3.94731959793656	7.90310272159266e-05	0.00106761434045451
Gprasp1	29966.844571607	0.479431354245442	0.121505226491703	3.94576733930189	7.95448246279294e-05	0.00107369616999777
Npas4	5996.61875363935	-1.11934034304648	0.283863840274703	-3.94322976101238	8.03915690484432e-05	0.00108425881385943
D930020B18Rik	13.1950713248511	-1.15748980269775	0.293651294286766	-3.94171531070249	8.0900966361852e-05	0.00109025835433857
Nefh	282.282531769394	-0.796606501373789	0.20211545798513	-3.94134377110531	8.10264018885169e-05	0.00109107800820534
Frmd6	296.819191098275	-0.692917105580521	0.175892525053127	-3.93943463698204	8.16738493647035e-05	0.00109892001623297
Smim24	5.70722327044988	-1.54482438871441	0.39217712143542	-3.939098698721	8.17882813292822e-05	0.00109958353385849
Zbtb20	914.11428362133	0.711121217298799	0.180622306525618	3.93706198850881	8.24853048679976e-05	0.00110807228162371
Wisp2	14.6942264286886	-1.19626489498938	0.304023531574103	-3.93477731409682	8.32738693106399e-05	0.00111777627756714
4930563E22Rik	130.506569871994	0.589517121514821	0.149901703225112	3.9326912825635	8.40000889756005e-05	0.00112647195497129
Rint1	411.660032361045	-0.421573076748763	0.10720138347183	-3.93253391976554	8.40551144891525e-05	0.00112647195497129
Pde6g	7.05290801759552	-1.44678650050808	0.367926451612038	-3.93227095841875	8.41471409862482e-05	0.00112681096169214
Etl4	637.784921955937	-0.559718603758954	0.142380132878497	-3.93115663290328	8.45381703166138e-05	0.00113115019331723
9330158H04Rik	12.9386580077738	-1.20875638995239	0.307604697776454	-3.92957714459495	8.50953733613097e-05	0.00113770425540703
Igsf1	78.458430774781	0.618799688768793	0.157480175435083	3.92938150506364	8.51646310320136e-05	0.00113772939842293
Rassf6	12.8839951954635	-1.42344175679672	0.362398874519975	-3.92783161559808	8.57151874924051e-05	0.00114417917470099
Akap7	1212.99110640083	0.582235150589773	0.148313593182548	3.92570322177512	8.64767241945476e-05	0.0011534328315554
Arl2bp	2284.21919487494	-0.325374629369825	0.0829001031879064	-3.92490017331235	8.6765711473416e-05	0.00115637395733236
Myo1f	23.5468283870269	1.43465285435193	0.365605781568225	3.92404312699363	8.70751370083783e-05	0.0011595826210753
Rnf183	4.29659209712048	-1.96989816348534	0.502109412834138	-3.92324484093282	8.73642854680573e-05	0.00116251641009741
Hk3	9.30438206747205	1.56252397229342	0.398351336471122	3.92247704284204	8.76432464970491e-05	0.00116531012625919
Ccl17	15.3404165234215	-1.3043403456007	0.332691709299999	-3.9205676280455	8.83406397654117e-05	0.00117365857047895
Tgfa	166.939810839699	-1.00049275340121	0.255282546993366	-3.91915845867524	8.88586824731625e-05	0.00117961298132219
Ang	18.5522391455548	1.15392162276408	0.294517348670285	3.91800900006031	8.9283373468837e-05	0.0011843197520776
Mthfd2	794.178256625616	-0.767230964726308	0.195848624420445	-3.91746925461792	8.94834543700824e-05	0.00118604208044993
Vipr2	30.9073679923576	-0.843760169776679	0.215515819708236	-3.9150730137535	9.03768540406372e-05	0.00119694396653349
Dnm3	4479.04875114178	0.675954894253405	0.172892370797029	3.90968607311747	9.24161446416324e-05	0.00122299296114311
Urb1	366.826311642252	-0.589320615183486	0.15077729536326	-3.90855011534505	9.28516878397109e-05	0.00122779451907702
Prdm5	100.053313600636	0.687938123062466	0.176053811109013	3.90754462359518	9.32388251398225e-05	0.00123194898381146
Agap1	6295.4994831754	0.475568869645531	0.121735501053507	3.90657503793	9.36135811053228e-05	0.00123494072526787
Arhgdig	3633.3497330356	0.378699641432387	0.09694109230158	3.90649241143546	9.36455828827422e-05	0.00123494072526787
Usp25	888.476616333356	-0.554179105649097	0.141864709659728	-3.9063915682648	9.36846540961827e-05	0.00123494072526787
Lynx1	971.142447683644	-1.02079237782793	0.261509126312599	-3.90346750884596	9.48242850834682e-05	0.00124898820430534
Uros	951.550103082084	0.32027072722972	0.0820652639396469	3.90263446255722	9.5151347179424e-05	0.00125231928953371
Nrros	47.2644521666262	0.916920004786128	0.235051087818279	3.9009392098411	9.58202123330818e-05	0.00126014026904706
Hs3st3b1	13.0259536177439	-1.22695861824884	0.314737476259943	-3.89835564810684	9.68481060839439e-05	0.00127266701893656
Ankra2	1814.91091732119	0.319708631129948	0.0820221787405032	3.89783148947339	9.70579138532887e-05	0.00127443229652149
Lrrc66	2.0228725646489	-3.1175868915103	0.80026795376252	-3.89567878715214	9.79240963198216e-05	0.00128480675249146
Mir551b	1.8222501082665	-3.45837192950657	0.88778870044583	-3.89548991530287	9.80004399017933e-05	0.00128481011504789
Grm8	110.858443821108	-0.847250958221049	0.217507490440508	-3.89527255592509	9.80883679258482e-05	0.00128496522947702
Sh3gl3	1807.82840719841	0.477809017358917	0.122742652464886	3.89277083201054	9.91057626861587e-05	0.00129728675094455
Gfod1	1574.33058081496	-0.525278631797255	0.135045049750423	-3.88965484309143	0.000100386899149133	0.00131303886834412
Slc9a6	4143.19761773557	0.537826588782731	0.138336900796415	3.88780278932394	0.00010115576037184	0.00132207133872979
Scg3	5194.09058864741	0.411853906266463	0.105973895635146	3.88637129736572	0.000101753834553917	0.00132812180485319
Cacna1i	474.787465641768	-0.870011000797138	0.223868656995055	-3.88625639906508	0.000101801983231122	0.00132812180485319
Gimap8	4.50028906892803	-1.73106931240726	0.44544803526755	-3.88613076128516	0.000101854656951609	0.00132812180485319
Nudt1	171.194734295479	0.720604519627775	0.185459685762415	3.88550490995069	0.000102117428991718	0.00133052076076709
Serpinh1	318.418695430246	-0.708964690429458	0.182504854879187	-3.88463469039643	0.000102483865854569	0.00133426565830397
Tmem132b	3044.64510860544	-0.442864409084698	0.114011309257026	-3.88439017120933	0.000102587052488614	0.00133458009886189
Cox20	278.606982237491	0.44629420829692	0.114939450247177	3.88286360633503	0.000103233480407845	0.00134195577380052
Slc15a3	13.1134345064306	1.37164783261677	0.353275476186749	3.88265793998021	0.00010332086365283	0.00134205854126284
Gpsm2	318.089518482986	-0.484130758026271	0.124708033926393	-3.88211362799626	0.000103552467184497	0.00134403302142769
Rab40b	735.296379020444	0.522546571270132	0.134626845091038	3.88144408284077	0.000103838029209906	0.00134670427130451
Ntm	2834.70729342549	-0.720380994760706	0.185644603474306	-3.88043057152701	0.000104271707671799	0.00135129091001227
Trip10	94.5383966978066	-0.995911011311082	0.256670081538269	-3.88012114751517	0.00010440444950689	0.00135197356930471
Rtdr1	7.27606882208045	1.34785722203326	0.347481708841498	3.87892999181745	0.00010491694131337	0.00135756894330847
Lyve1	6.11614857579543	-1.50112536304843	0.387416338826971	-3.87470845342654	0.000106752429175272	0.00138026150004108
Aipl1	9.25771915181787	1.32728170788734	0.342629490800819	3.87381046735094	0.000107146754306839	0.00138429999481658
Tmem117	412.763251666751	0.603976536742386	0.156187174238245	3.8670046992533	0.000110180305604302	0.0014224041593534
Cyba	46.138797744954	0.850864299778546	0.22005419567875	3.86661248223004	0.000110357575781641	0.00142250894036628
Xpot	4588.83736914306	-0.279712139648105	0.0723410643844517	-3.86657484276971	0.000110374601816397	0.00142250894036628
Dlgap1	2558.8478099707	-0.505936662091602	0.130853772679372	-3.86642778218774	0.000110441147744889	0.00142250894036628
Kcnf1	1833.66066009355	-0.64875674223218	0.167818157971238	-3.86583162439054	0.000110711301182214	0.00142490170103877
4933417D19Rik	14.2906121888754	-1.11716765486527	0.289053243873977	-3.86491997077307	0.000111125629829684	0.00142914500023156
Gfral	5.2499780447182	-1.60057470439204	0.41415801804244	-3.86464739221354	0.000111249795209044	0.00142965299992383
Snapc5	418.006566437374	0.544107879402201	0.140804012556677	3.86429242691633	0.000111411685710356	0.00143064465772249
Taf9b	2183.79928855104	0.385047152703354	0.0996504105657393	3.86397959142716	0.000111554546105136	0.00143115263951329
Cyb5r3	3585.25917003803	0.38474626103097	0.0995762724924225	3.86383474095446	0.000111620752471811	0.00143115263951329
Maats1	78.020265520003	0.611912786468293	0.158429781439668	3.86235959494342	0.000112297107128586	0.00143873213275667
Mblac2	2989.90484967089	0.33559733890211	0.0869833398242452	3.8581795040315	0.000114234739005859	0.00146244715910003
Stmn2	21636.298978637	0.452118881111641	0.117364236337876	3.8522713155143	0.000117027251934533	0.00149706225467161
Bcl6	136.2020690213	-0.744829318210297	0.193427863029001	-3.85068266043255	0.000117789041962138	0.00150566673926772
Zfp804b	341.587143516708	-0.653669340491716	0.169805999167021	-3.84950675299031	0.000118355920758142	0.00151176859146898
Cd1d1	82.2429539001773	0.820482371017061	0.213297004107443	3.84666617541315	0.000119735931460262	0.00152823956057293
N4bp2	778.993512131508	0.523707388268753	0.136164973234962	3.84612412301555	0.000120000989533052	0.00153046579248876
Tmem169	1300.15397816058	0.298764920336275	0.0777349924619828	3.84337749157677	0.000121352589569578	0.00154653571884671
Mchr1	118.456077103981	-0.729072697690515	0.18972961594873	-3.84269316123809	0.000121691570782699	0.00154968617212418
Ccdc138	236.957426003814	0.516207268713988	0.134347263006664	3.84233557990967	0.000121869052656448	0.0015507768072018
Olfr920	7.7655282845474	-1.45156444022804	0.377860189055057	-3.84153843742596	0.000122265585051094	0.00155465110630479
2010300C02Rik	628.628787027447	-0.637871323633875	0.166053803956259	-3.84135327488131	0.000122357866660366	0.00155465382725879
Kcnj14	7.47108164537897	-1.39697863983096	0.363689014870917	-3.84113509814637	0.000122466686204131	0.00155486651371651
Acacb	25.3688053826317	-0.917875328408648	0.238972078156686	-3.84093127317924	0.000122568429975228	0.00155498911236792
Sh3bgrl2	504.435853035514	0.378085711687495	0.0984612862014273	3.83994284732403	0.000123062955967081	0.00156009089674184
Gareml	82.7155783633854	-0.653284399197481	0.170285551114054	-3.83640534927079	0.000124848281186457	0.00158129068859695
Adm2	3.64724558852912	-1.95797169234677	0.510385652565553	-3.83625927277667	0.000124922526269592	0.00158129068859695
Polr3g	108.857746236208	-0.640237887868104	0.166951754826208	-3.83486767500332	0.000125631911906136	0.00158907899958577
Zfp667	853.67107558842	0.495508635710978	0.129239008753305	3.83404856235643	0.00012605123905236	0.00159313790284875
Cyp4f41-ps	2.90894258657283	-2.49943450666208	0.651934683068229	-3.83387258198763	0.000126141500420987	0.00159313790284875
Slc6a14	1.20270182850972	-5.7988497123333	1.51280039790959	-3.83318891265909	0.000126492736841923	NA
Usp36	798.205924047565	-0.56677268534154	0.147885415237753	-3.83251238420198	0.000126841211898081	0.00160077780576307
Atp8a1	11088.1604268918	0.402821879634218	0.105142511052849	3.83119896605612	0.000127520329452928	0.00160814658935186
Tmod3	735.189808026627	0.664656382959169	0.173499270829587	3.83088862437931	0.000127681294875382	0.00160897488452664
Cd99l2	5436.45235114507	0.423857783053088	0.110672890318834	3.82982482730875	0.000128234510683932	0.00161474119866434
Mslnl	4.21252125313409	-1.96937525697455	0.514273940266076	-3.82942844810614	0.000128441220356149	0.00161613893214152
Gfra2	105.943867108681	-0.874188906370793	0.228327909108848	-3.82865550594627	0.000128845209196936	0.00162001504281419
Smad5	1442.30934460111	0.440608614855096	0.115290093899503	3.82173871103939	0.000132514055081918	0.00166490501050094
Prokr2	1036.55979954823	0.566663154197727	0.148284432180269	3.82146086319323	0.000132663469705734	0.00166554301074426
Rcan1	2100.56005912122	0.372904751943042	0.0976159098620131	3.82012268768655	0.000133385308941041	0.00167336131261398
6530402F18Rik	783.365083783063	-0.633808528264784	0.166076182904118	-3.8163722045003	0.000135428166897286	0.00169772830454906
Cgn	118.137155602642	0.608066666531635	0.159383666569067	3.81511280058383	0.000136120739591024	0.001705144516865
Nedd4l	2659.74448828433	0.530284096532262	0.139015153642498	3.8145776387514	0.000136416045339387	0.00170757697672416
Duoxa1	4.86778873125595	-2.3203894094928	0.608360023017549	-3.81417141445841	0.000136640605345156	0.00170912093470986
Nin	1125.4840500721	0.397406041074585	0.104250382502809	3.81203436892786	0.000137827706051905	0.00172269329710767
Pcdhga10	192.412450727589	-0.537034782311907	0.1409097649384	-3.81119635354354	0.000138295858950932	0.00172726617917562
Shisa6	231.568191334614	-0.867763504448335	0.227726673093761	-3.81054837652265	0.000138658874368414	0.00173052014233928
Ano10	1014.00943079637	0.434452947202026	0.114045029220716	3.80948604398365	0.000139255966406238	0.00173668851457588
Ror1	11.3413079896731	-1.17830977416007	0.30967484289361	-3.80499030256999	0.000141809746454405	0.0017672320137484
Ablim1	2683.59861940607	0.483191297896568	0.127259191491098	3.79690686570462	0.000146512802896376	0.00182449497766092
Itgal	21.9560395446652	1.48594239283104	0.391437094212879	3.79612053839467	0.00014697805492584	0.0018289398934987
Gabra3	1007.69850716667	0.818585779226655	0.215761202635425	3.79394334675559	0.000148273518570894	0.00184370149822395
Mkx	154.434963396168	-0.704934680203916	0.185899239850064	-3.79202561975228	0.000149423494447003	0.00185598705068851
Gucy1a3	5045.98559992549	0.520943031321569	0.137382046455498	3.79192947522673	0.000149481368526375	0.00185598705068851
Mcur1	335.513305278105	0.570655160624137	0.150575717479292	3.78982195919216	0.000150755299109552	0.00187042908211896
Sema3c	1870.44043781197	-0.583125689865779	0.153891505461326	-3.78919998292123	0.000151133214140384	0.00187374115563475
Cpq	32.6839306984118	-1.10581965557074	0.291905426027889	-3.78828057641206	0.000151693482737512	0.00187930751981338
Lsm6	1123.25366151644	0.459358577280748	0.121272128049731	3.78783307152302	0.000151966890481816	0.00188131445210847
Otogl	208.607815158329	0.721195470942063	0.190446115813042	3.78687413950752	0.000152554322750687	0.00188626309103192
Ier5l	18.3537023128894	-1.22834258485403	0.32437345812841	-3.78681594955825	0.000152590038040365	0.00188626309103192
Ramp3	178.028694543559	-1.27459925927663	0.336845421835182	-3.78392929413269	0.000154371695611647	0.00190689133291753
Ccl9	11.6857950968699	1.51925047335706	0.401553692860527	3.78343046115317	0.000154681555023822	0.00190932217699727
B3galnt1	2841.0488788236	0.321346276509339	0.0849666151137239	3.78202987231198	0.000155554689239717	0.00191760119134596
Klhl35	5.41066780872632	1.77722672122176	0.469918364530417	3.78199035272375	0.000155579393115241	0.00191760119134596
Ccdc93	1233.18216779877	0.380926828780191	0.100768308861237	3.78022448808531	0.000156687019620316	0.00192984464865693
Lor	27.1041899193823	0.878751919773365	0.23248808748137	3.77977181236773	0.000156972150141884	0.00193194732310193
Syne4	17.431613187004	-1.08757783976111	0.288148619186211	-3.7743642250747	0.000160416246975278	0.00197289784881613
Il10	2.62330625834454	2.58462326614117	0.684926011866957	3.77358024277112	0.000160921428339762	0.00197767047958168
Klf12	1025.22329588282	0.454215942335734	0.120386167621169	3.77299112772707	0.000161302026138834	0.00198090619154935
Dst	15700.5893380457	0.546936766106499	0.145013179241731	3.77163488840403	0.000162181446640536	0.00199025865404948
Adam3	2.25415916715388	-2.37103531846821	0.628819952782431	-3.77061082107326	0.000162848465464559	0.00199699287424441
Ppap2b	549.325289939246	-0.541618355896223	0.143680325687587	-3.7696069611778	0.000163504826961682	0.00200358672574381
Dgkd	6808.76015822006	-0.303818441649604	0.0806029851860536	-3.76931996933251	0.000163692930089656	0.00200443714103983
Tnik	6226.67559863416	0.500527829810152	0.132814937363485	3.76861096911351	0.000164158503452428	0.00200868151398384
Lhcgr	8.87290822337587	1.34118511706037	0.355908901256009	3.76833822454932	0.000164337935984004	0.00200942098988117
Sort1	5505.36655657484	-0.453018231199823	0.120266623555409	-3.76678265180621	0.000165364844892559	0.00202051430597377
Cyb5d2	252.281061829557	0.384833274790767	0.102226664937545	3.76450972968628	0.000166876170917487	0.00203750616204822
Fgf7	11.5361840808179	-1.15576087780456	0.307034078133335	-3.76427556456014	0.000167032609656494	0.00203794266377136
Pak3	26101.8229564173	0.448946671343439	0.119277843779428	3.76387313115456	0.000167301785752741	0.00203975303553847
Unc80	1814.40612126503	0.408426465323976	0.10853531251003	3.76307448588434	0.000167837185469721	0.00204480426684105
Il10ra	28.8315756321892	1.18046553218223	0.313736141032722	3.76260614507626	0.000168151903369081	0.00204716152868803
Mrgpre	237.923911777405	0.494580442716636	0.131519441056381	3.76051204859223	0.000169565906946233	0.00206263552243853
AI597479	1449.58074412431	0.375848723380871	0.099950127177683	3.76036263278304	0.000169667223775146	0.00206263552243853
Leprot	949.990819134592	0.465929361600774	0.123935566200757	3.75944836404779	0.000170288418285867	0.00206721242971145
Irs1	2005.83880629316	0.571674546833378	0.15206342031019	3.75944816752928	0.000170288552038886	0.00206721242971145
Snapc4	651.084821422028	-0.399698841861508	0.106343978416134	-3.75854700768715	0.00017090293324104	0.00207318026631337
Hspb8	102.986991705604	-0.661825624770881	0.176115930050408	-3.75789756543575	0.000171346993689855	0.0020770748998183
Pcdhac2	1765.22624722176	0.578271831161171	0.153899593829188	3.75746171106202	0.000171645620324842	0.00207920225595787
9930014A18Rik	60.4190393354814	-0.913425934466447	0.243224950549405	-3.755477932684	0.000173011005560696	0.00209367415088825
Tmem184a	4.52091210510041	-1.7560738019168	0.467617210025425	-3.75536606495155	0.000173088304787398	0.00209367415088825
Tmem141	164.363608189161	-0.679709402365906	0.1810799641035	-3.75364224159778	0.00017428355976543	0.00210662289921192
Fra10ac1	167.946336073172	0.585329537813594	0.155948443945942	3.75335285818236	0.000174484970151692	0.0021075487882557
Trpm6	8.98700401491109	-1.23702670239099	0.329739747107937	-3.75152438624897	0.0001757626534959	0.00212146402210991
Dhx32	1939.34736693747	0.273166002779231	0.0728316290615798	3.75065073099308	0.000176376240002691	0.0021273494204896
Tmem200c	74.9133326555825	-0.871520223559842	0.232438966665961	-3.74945834625184	0.000177216928120133	0.0021359636318605
Col2a1	34.5362856756762	-0.973806404328378	0.259809959858393	-3.74814885795427	0.000178144520474315	0.00214561224873701
Megf6	34.2863427797661	1.0290848407651	0.274577751574307	3.7478813737267	0.000178334556927607	0.00214637015558059
Nudt12	48.3137300566276	-0.795263435507987	0.212244217134565	-3.74692628258409	0.000179014666193	0.00215302112060897
Fam185a	615.5379546694	-0.36327752208944	0.0969600543261264	-3.74667201472012	0.000179196138003062	0.00215366974115281
D630003M21Rik	20.8358857103273	0.951841934814591	0.254172118286747	3.74487155094156	0.000180486092376533	0.00216763026733295
Khdrbs3	3898.67791496378	-0.408242761520572	0.109059392110342	-3.74330677643542	0.000181614271739015	0.00217962941903696
Slc17a9	7.99880479030633	-1.33038742508918	0.35557538386732	-3.74150598002476	0.000182920824189742	0.00219375073669601
Csf1r	41.0460198966508	1.24549696930429	0.333081690418667	3.73931382340099	0.000184523250989577	0.00221039810423742
Csf3r	5.92587376315323	1.71930783008192	0.459800286891476	3.7392491459835	0.000184570728827121	0.00221039810423742
Paqr8	1334.04082898617	-0.349757195728696	0.0935634505264393	-3.73818188363908	0.000185355835646429	0.00221822724360425
Gart	930.485668956289	-0.31599499253183	0.0845480986338026	-3.73745829460314	0.000185889911726737	0.0022230432361315
Nudt11	2134.59527681115	0.358437212201907	0.0959235763253884	3.7366956689149	0.000186454366006957	0.00222821544543063
Mxi1	1532.37596076215	0.522445054916815	0.13984465803867	3.73589568771621	0.000187048199995527	0.00223373119174291
Rps19	6130.98104446933	-0.4024130896879	0.107728295356829	-3.73544469774617	0.00018738375746662	0.00223615698132957
Rap2c	1245.71814719084	0.361563129350174	0.0967984230463681	3.73521714477703	0.000187553282134815	0.00223659938003425
Pcdhb13	187.751061962895	-0.608397485998341	0.162893178151488	-3.73494760739791	0.000187754271272697	0.00223741610777047
Gnptab	4832.77214080583	0.246089522779169	0.06592604157152	3.73281205594906	0.000189353884696772	0.00225488695133264
Vegfc	22.6870517295168	-1.0006455580534	0.268175983835657	-3.73130190012323	0.000190492773841167	0.00226685058427198
Trappc10	3447.60590051695	-0.282903642815698	0.0758275659662186	-3.73088123310898	0.000190811165884163	0.00226904038529576
Cmya5	43.0095491621604	-0.900719986926152	0.241544991889941	-3.72899466835793	0.000192245219121083	0.00228448470800747
Syde1	54.4762075347324	-0.805154411476602	0.215970815544058	-3.72807043140675	0.000192951459300579	0.00229126465664528
H2-K1	260.533138386784	0.597421146114576	0.160258476758338	3.72785988110605	0.000193112688415882	0.00229156771369682
Igsf3	2805.51250756571	0.52344345019322	0.140495997813612	3.72568228518256	0.000194787627171374	0.00230982013512347
Gm20300	1782.95432850104	0.312833455337581	0.0840270855726162	3.72300732800294	0.000196863805822464	0.00233280156148641
Chn2	702.188727591368	0.612590791043033	0.164675471731029	3.71998807474863	0.000199232184858986	0.00235787259440171
Rgs12	1040.60705574468	-0.454071377881106	0.122063696913026	-3.71995433011214	0.000199258805650316	0.00235787259440171
Ocln	227.861601721848	-0.816321762055205	0.21955491316053	-3.71807558439079	0.000200746212258375	0.00237380990209729
Hormad2	2.89133514252088	-2.19855069188974	0.591507854324179	-3.71685798559965	0.000201715751610268	0.00238360544555002
Ube2l6	186.403865633907	-0.699882425162046	0.188320099371826	-3.71645101875278	0.000202040787431459	0.00238577673885848
Fgf15	44.4394931486922	0.870049229621893	0.234316592602515	3.71313537790219	0.000204707313319365	0.00241344458488853
Kank4os	11.4897766300158	-1.51504204288073	0.408029390786693	-3.71307086472295	0.000204759522902655	0.00241344458488853
Plcd3	179.549107957694	0.621592577253693	0.167409560246729	3.71300525691356	0.000204812631182356	0.00241344458488853
Arl10	984.512370682904	0.488880321989307	0.131825477458662	3.70854201641418	0.000208456074153698	0.0024546647616174
Cog7	930.293207298651	0.360902433167522	0.0973285192207937	3.70808511273865	0.000208832470192473	0.00245738333914293
Fam134b	2087.83430643475	0.460372654261133	0.124167026072848	3.70768849687222	0.000209159718735521	0.00245784179085249
Sgk1	1648.22615955803	-0.557925791143596	0.150478203817361	-3.70768507989878	0.000209162540178552	0.00245784179085249
Chek1	93.7954348505108	-0.688995642439767	0.185846845328576	-3.70733030857546	0.000209455674448719	0.00245957476963913
Pygm	56.6921385365954	0.935761479551875	0.252475468373782	3.70634614752555	0.000210270870932288	0.00246743149865366
Akap13	853.913379634792	-0.553554307819485	0.149377967920476	-3.70572926868425	0.000210783359814997	0.00247172764849725
Slitrk4	3216.43785779963	-0.544069816613623	0.146826843820938	-3.70552007013882	0.000210957423394764	0.00247205208288964
Mroh5	8.74087449850835	-1.27614859827698	0.344487277712328	-3.70448687322108	0.000211819076024627	0.00248042782090975
1700028K03Rik	16.9288005390435	-1.05373633341056	0.284509560480612	-3.70369393432867	0.000212482601706591	0.00248647346667879
Nr1i2	0.96703247080287	-5.6338160714392	1.5215118536545	-3.70277501151727	0.000213253991427018	NA
Vmn2r3	2.13107010925469	-2.87677401298332	0.776955224451875	-3.70262522529895	0.00021337997845147	0.00249524537128222
Lair1	43.8434125741788	0.795718937509943	0.215139097441562	3.69862543337147	0.000216770218793047	0.00253313627303764
Zdhhc23	71.3014853481	-0.835206176635877	0.225996434597759	-3.69566085466093	0.000219315572920845	0.00255897423645525
Fam83b	3.69670246208925	-1.91021692244987	0.516885217476996	-3.69563078583281	0.000219341532844143	0.00255897423645525
Pcdha8	26.1930923540966	-0.976194745438371	0.264156153398168	-3.69552150453574	0.000219435905151439	0.00255897423645525
Tubb3	37503.6251576177	0.467292379496993	0.126506365952383	3.69382501804598	0.000220905842134427	0.00257433819895234
Myh3	19.6891594280677	-1.12785055515434	0.305442640197944	-3.69251180654877	0.000222050028784681	0.00258588743866077
Rabl6	1743.65296030344	-0.304053478301849	0.0823488122600748	-3.6922630692181	0.000222267376600007	0.00258663468040505
Nrip1	1539.18609053783	-0.603764980435455	0.163530954662099	-3.69205317539425	0.000222450938134954	0.00258698797613419
Ptgs2	306.496233175018	-1.31519109468701	0.356316690956	-3.69107349745068	0.000223309594143922	0.0025951863776423
Kcne2	4.73589292251313	-1.76262785520352	0.477583491975574	-3.69072190479664	0.000223618511672633	0.00259698912524352
2700038G22Rik	41.970966328431	-0.800494955095852	0.216911984093848	-3.69041368756055	0.000223889648473443	0.00259835093066843
Fam109b	19.5587530753718	0.960531422216565	0.260331474004276	3.68964769200664	0.000224564827144987	0.00260439675217737
Iah1	330.544132776448	0.739075589741725	0.200371914449423	3.68851888136387	0.000225563289725678	0.00261418099540687
9530026P05Rik	13.0349378960271	-1.18759420208846	0.322153019112614	-3.68642890685844	0.000227422935873908	0.00263392571684967
Zgrf1	175.492121287185	0.713710267663669	0.19371623179658	3.6843080264597	0.000229324786073969	0.00265413182840647
Nceh1	2658.23071824545	-0.489599758777546	0.132980720348659	-3.68173489731352	0.000231652220539372	0.00267795464363984
Nckap1l	102.686334034976	0.943785544710737	0.256348628135251	3.68164850959448	0.000231730742831097	0.00267795464363984
Iyd	168.284056680041	-0.729724168396826	0.198213410570535	-3.68150755438997	0.000231858917979477	0.00267795464363984
Prkce	4906.58487317014	-0.514666345111892	0.139820047684385	-3.68091953647196	0.000232394339831095	0.00268060979586796
Has3	134.382717142224	-0.713779392806595	0.19391402867592	-3.68090641858358	0.000232406297592722	0.00268060979586796
Mapk9	6403.34324963372	0.289605767737882	0.0786905320019299	3.68031274373363	0.000232948073491453	0.00268502468872128
1700026L06Rik	8.05381833194136	1.26980094798321	0.345100241514034	3.67951335650273	0.000233679450964046	0.0026916174686077
Tmeff1	7811.16785622387	0.316837849901918	0.0861265415712258	3.67874808533785	0.000234381633249598	0.00269786520726156
Fzd6	32.7995941478508	-0.97345255238009	0.264921549408204	-3.67449365502595	0.000238321566263052	0.00274134738958985
Whrn	83.8885280631231	-0.684264113680508	0.186230463193869	-3.6742866980263	0.000238514800555755	0.00274170246574845
Enkur	96.7551864011876	0.767034760214889	0.208858403924243	3.67251087724058	0.000240178924744116	0.00275895328110826
Ctnnbip1	2052.55510671485	0.339983448492541	0.0925817145078334	3.67225267213835	0.000240421794241302	0.00275986568154903
Vgll3	54.3073935073973	-0.975673055228852	0.26578612062659	-3.67089542873309	0.000241702219959845	0.00277267913467524
Mki67	174.350818298543	0.780655105059537	0.212800292169376	3.66848699830817	0.000243990099440179	0.00279702431713976
Rassf2	365.439997990438	0.708574192461025	0.193294233161352	3.66578030224804	0.000246585554461759	0.00282486002214468
Mamdc2	48.0514504918132	0.91537196821411	0.249800391878974	3.66441365975759	0.000247905847814432	0.00283805976013186
Tspan5	3033.3440964253	0.784757246718673	0.214222276097483	3.66328498144406	0.000249001243854035	0.0028486687017068
Cth	208.117679173728	0.772689019738233	0.21094783366712	3.66293887121663	0.000249338056489075	0.00284966350480701
Gm10494	13.4639916121812	1.09917235438074	0.300086734563325	3.66284886261373	0.00024942571716835	0.00284966350480701
Rab5b	6394.81708856551	0.261039856890602	0.0712716020720382	3.66260683500218	0.000249661574743185	0.00285042958155066
Gnb4	1820.54781218279	0.460866206125132	0.125866942702679	3.66153492115705	0.000250708679156952	0.00285872585097776
Nr4a1	2079.32737996985	-0.782819430803558	0.213801418929546	-3.6614323455988	0.000250809096247132	0.00285872585097776
Pabpc4	1372.15857598192	-0.460873735740994	0.125875580002666	-3.66134349276669	0.000250896109863144	0.00285872585097776
Fcgr4	4.7818579154638	1.65190270191082	0.451283103939117	3.66045767610586	0.000251765139985033	0.00286636988131996
Prph	261.116411935761	0.74646827168602	0.203935590707254	3.66031387212623	0.000251906484891557	0.00286636988131996
4632428N05Rik	26.7176448523075	1.16358671580365	0.318020961571761	3.65883654351849	0.000253362866726209	0.00288100024750085
Pet112	493.135677453469	0.368092397542707	0.100622227579033	3.65816188330349	0.00025403058416812	0.00288664902036533
Adcy10	6.03778139600497	-1.47522078751191	0.403581861516337	-3.65531984507237	0.000256861535168937	0.00291685533481013
Gna15	5.17165814602286	1.64178902935079	0.449527818212193	3.65225234754172	0.000259950247992585	0.00294994616102338
1700086L19Rik	1261.52652336603	-0.787033182030165	0.21550850100581	-3.65198207196916	0.000260224055678741	0.00295107011698537
Prkca	3249.27729988109	-0.530934987844148	0.14553799415468	-3.6480850992069	0.000264202135208776	0.00299417265445328
Tiam2	1284.0912544687	0.508205251992276	0.139315689225194	3.64786805289961	0.000264425366436352	0.00299469264764872
Fer1l4	3.79577529865544	-1.76069211101448	0.482702479275466	-3.64757213109256	0.000264730005686601	0.00299613329492222
Espnl	2.59867000583017	-2.04772962558308	0.561596697235912	-3.64626365443684	0.00026608097635519	0.00300940613980826
Mapk12	9.60430781844063	-1.15010236615146	0.315434734647049	-3.64608662212916	0.000266264253529024	0.00300946330996727
Tfrc	12158.8463291131	-0.6847642096417	0.187903888189226	-3.64422586589649	0.00026819782086834	0.00302928990179451
Kank3	209.306271523301	0.460396918189534	0.126417247159999	3.64188375029902	0.000270650294562382	0.00305494710827566
Pik3r6	16.1436989259943	1.06680313401821	0.293117543657399	3.6395062564563	0.0002731613011015	0.00308123028082828
Fcgr1	1.49091614459786	4.12329203468383	1.13349610796077	3.63767639405652	0.000275108774794266	0.00310112601547128
Lrch2	1277.65599910033	0.46234425224922	0.127116775026989	3.63716159532098	0.000275659002173417	0.00310525544409628
Ccdc184	1331.11268967766	0.520899846699026	0.143261739853344	3.63600112097109	0.000276903125926008	0.00311719078959104
Aen	1638.47457893785	-0.356078607149396	0.0979457663005669	-3.63546706099266	0.000277477448396111	0.00312157507902513
Igfbp2	1559.53293627271	-0.53701044735238	0.147755073100491	-3.63446368428344	0.000278559489133132	0.00313166147370311
Tnfrsf19	1616.94692056687	-0.464829634130939	0.127916578158943	-3.63384981697497	0.000279223431446829	0.00313703716793823
Ipo11	4492.21763437043	-0.328283302020418	0.0903599359571255	-3.63306257959483	0.000280077056541801	0.00314453535689153
Cdkl2	3516.34921513717	0.491901147789342	0.135550384693867	3.62891738669922	0.000284612295821257	0.0031933310479985
Vit	96.4127847940011	1.17937517447854	0.325047194499713	3.62831980843196	0.000285271750276685	0.0031980925308346
Zfp90	787.621184821265	0.276370646398145	0.0761731510836101	3.62818975540071	0.000285415459195057	0.0031980925308346
Ccm2l	3.11777462380542	1.91558844841615	0.528090265124168	3.62738829878969	0.000286302568739939	0.00320590528895399
Ppfia1	779.377263408514	-0.336372216962381	0.0928045462422959	-3.62452304959472	0.000289495202261182	0.0032395069485635
9930021J03Rik	2503.07723358659	0.264010953761807	0.0729057789637762	3.6212623678705	0.000293169014204852	0.0032784450158034
Nox4	27.9894839058248	-0.910575224580219	0.251623649766485	-3.61879825455701	0.000295974254757751	0.00330731885296887
Cd48	17.7450999706534	2.05717794991925	0.568505303312817	3.61857301582164	0.000296231925344746	0.00330731885296887
Npc2	2790.03045712049	0.500815103312185	0.138404834836424	3.61847983059322	0.000296338589632944	0.00330731885296887
Simc1	872.569962452171	0.387743585825621	0.107171585294074	3.6179700501926	0.000296922745734097	0.00331164959343855
Aldob	18.3077945719589	-0.926233489215196	0.256047453959881	-3.61742901517123	0.000297543896064531	0.00331638694979912
Col4a3bp	1783.29678741985	0.279738012624053	0.0773359164819163	3.61718106346441	0.000297828970430717	0.00331737466668409
Dtd1	1399.59381545184	0.341456794779172	0.0944196472889683	3.61637439434776	0.000298758182743151	0.0033255310967705
Pdxp	5087.82955184127	0.322003559578767	0.0890650229512733	3.61537614777164	0.000299911834643942	0.00333617341225138
Mir124a-2	13.5757699437588	1.09812368333181	0.303833925278823	3.61422340288065	0.000301249227175977	0.00334884427260931
Krt78	3.40931371682513	1.9610071891115	0.542708582266143	3.61337051447222	0.000302242324608946	0.00335767361404386
Anxa11	50.9231718791244	-1.04938945649202	0.290438011326879	-3.6131271237461	0.000302526288907267	0.00335861861570553
Clcn7	870.860625701943	-0.363214169444604	0.100594903430492	-3.61066174386829	0.000305416767758191	0.00338848064412931
B630005N14Rik	3804.32116214194	-0.412928597790454	0.114482036931464	-3.60692916424659	0.000309842200965288	0.00343532199967161
Slc14a1	8.22799173889597	1.43179693585313	0.397026318892326	3.60630232234412	0.000310591261591193	0.00344136748243365
Ly6e	1137.4709843288	0.567556001023838	0.157387033970955	3.60611663301677	0.000310813481070566	0.00344157143695579
Vstm2a	4199.63492126801	-0.49336164892635	0.13687230135863	-3.60453973542576	0.000312706606024109	0.00346026458015931
Pla2g4f	2.95098781963004	-2.09555375186516	0.581462565931331	-3.60393578993121	0.000313434520189571	0.00346604800780687
Arhgap22	22.8956318014484	0.879674618189241	0.244127489441341	3.60334110755933	0.000314152819610244	0.0034697646175032
Peli2	354.246709182926	-0.582239510357847	0.161584300701919	-3.60331732617964	0.000314181576463484	0.0034697646175032
Slc36a4	992.772636591053	0.447889418048923	0.124309764910771	3.60301073990782	0.000314552526595548	0.0034715908262042
C1qtnf3	6.84623216896888	-1.31304577145149	0.364567417296546	-3.60165420483376	0.000316198774881642	0.00348748041322757
Gm1141	17.4197218311615	-0.985879922970498	0.273768162118373	-3.60114892594494	0.000316814024437887	0.0034915077999098
Siglece	4.91662710052768	2.2656465778601	0.62916890642471	3.60101485423807	0.00031697746400934	0.0034915077999098
Crlf1	216.44106703989	0.62458186545031	0.173455569404599	3.60081759031571	0.000317218081299905	0.00349188039167548
Mid2	1557.13277760392	0.469750823914756	0.130603058108896	3.59678273017988	0.000322177370257075	0.00354416096036545
Tmem132a	8047.42759686212	-0.624405840512112	0.173653910736943	-3.59569121053647	0.000323531386592229	0.00355673892838306
Pnrc2	1901.64768624409	0.460610298254722	0.128183358405596	3.5933704966386	0.000326427922260176	0.00358624716674387
Fam35a	311.091625230558	0.496848414522661	0.138275111903109	3.59318757862086	0.00032665725521156	0.0035864332974658
Ntrk3	2936.99905679101	-0.370782434215869	0.103196548985891	-3.59297319396369	0.000326926231299411	0.00358705415316559
Lrrc59	2749.52621124235	-0.338206841841973	0.0941391736168277	-3.59262599030844	0.000327362287459267	0.00358950622469947
Itih3	13.7420023175639	1.09238922850646	0.304170047688375	3.59137672104265	0.000328935762576494	0.00360441874553321
Sec24d	932.552774896208	0.469898403705344	0.130881127198725	3.59026861826968	0.000330337356564503	0.00361677299497795
Prmt10	1357.04901464519	0.44622492281726	0.124291547826069	3.5901469618972	0.000330491574751331	0.00361677299497795
Rras2	2523.31908379577	-0.441444293335799	0.122996260684925	-3.58908710620586	0.000331837958125759	0.00362915528556449
6330416G13Rik	189.822838035962	-0.602784972668296	0.167978851624174	-3.58845751616955	0.000332640183547852	0.0036355742002518
Apol8	7.23763564830035	-1.3333370970872	0.371584862982816	-3.58824384390724	0.000332912857564647	0.00363620084918281
Nrp1	2553.79509284376	-0.576396604313766	0.160725042375519	-3.58622773274541	0.00033549599862671	0.00366085527690218
Chn1	3707.80832406686	-0.41413611596711	0.115482288683551	-3.58614399392396	0.000335603693512056	0.00366085527690218
Nhsl2	544.518974944041	0.752609414001178	0.209942394071374	3.58483772336765	0.000337287856326029	0.00367685135049795
Cenpq	234.915272912774	-0.571287018178876	0.159370520969343	-3.58464673833104	0.000337534753165677	0.00367716893029395
Fgf21	1.54468977750586	-3.0193815717489	0.842557880747763	-3.58358949662808	0.000338904569252459	0.00368890010746594
Psrc1	127.192996755688	-0.556203919573281	0.155220063409761	-3.58332490887453	0.000339248195358984	0.00368890010746594
Ostf1	236.504210201753	-0.458696781343562	0.128009220909415	-3.58331046845568	0.000339266958835402	0.00368890010746594
Clcn1	41.1057360055895	-0.791413046485658	0.220930323391003	-3.58218389553077	0.000340733792461622	0.00370246513481786
Lemd1	36.8109955530647	0.82058811860191	0.22909545520811	3.58186118470351	0.000341155064117651	0.0037037727550954
Cacna2d4	28.5518696641531	0.863145208364289	0.24098382736837	3.58175574597741	0.000341292811022648	0.0037037727550954
Diap1	615.001618803058	0.512042202494746	0.14297715784601	3.58128676082811	0.00034190613167965	0.00370804556168437
P2ry6	5.83191459248403	2.01475413720273	0.562941373249326	3.57897684011653	0.000344942031613638	0.00373856941323998
Stap1	3.47138836046356	1.97248560362889	0.55134467833294	3.57759071801136	0.000346775881399757	0.00375394409053026
Stmn1	30868.7850635116	0.500469870464125	0.13989106168579	3.57756860540693	0.000346805210306005	0.00375394409053026
Med12l	1009.34962349953	0.450428969005187	0.125937014356918	3.57662099030413	0.000348064255816289	0.00376515888770906
Tgif1	82.0034176505035	-0.673080013076105	0.188207864103168	-3.57625870886644	0.000348546728523551	0.00376778637553799
Gdf10	89.3316393628031	-0.93636214077047	0.261855355365942	-3.57587546552907	0.000349057798348932	0.00376778637553799
Ccdc74a	207.662278427091	0.542275481192995	0.151652244276721	3.57578276391018	0.000349181524781312	0.00376778637553799
Mrps6	874.316689659313	-0.416324708093777	0.116429413760828	-3.57576916902631	0.000349199672966774	0.00376778637553799
Astn2	360.858821949672	-0.581748311358337	0.162713711298397	-3.57528758158237	0.000349843126799874	0.00377219401107102
Nap1l3	3543.01519240361	0.377490538651313	0.105587942543393	3.57512921985555	0.000350054957677857	0.00377219401107102
Fam214a	1136.79219416306	0.388335626423193	0.108635367652167	3.57467033817735	0.000350669453548926	0.00377640586264488
Kcnj3	1215.62838696264	-0.510667403488004	0.142979288812436	-3.57161801355656	0.000354782616531481	0.00381413452027034
Zhx1	3786.73214024616	0.519596574876603	0.145480808212484	3.57158158014697	0.000354831983797449	0.00381413452027034
Prcp	366.702359737276	0.483780000484316	0.135453114870662	3.57156792552358	0.000354850487465635	0.00381413452027034
Ppp1r15a	1475.88434051643	-0.572054408484637	0.16021035716308	-3.57064561002342	0.000356102427839195	0.00382515623186555
Cyb5	1654.31874050784	0.339927248561456	0.0952544485030115	3.56862334414449	0.000358861899908525	0.00385234713404663
Ptger4	34.2832096708124	-1.02526469456345	0.287325935209095	-3.56829846848783	0.000359307067077485	0.00385467543498755
Fbxl21	84.7744386435016	0.73229117073243	0.205246153513683	3.56786793903843	0.000359897804054749	0.00385856147255143
Rcl1	495.302413810935	0.471315963163891	0.132106820852745	3.56768833071269	0.000360144516148444	0.00385875653533162
Thnsl1	1237.846478598	0.296705217533242	0.083173536479152	3.56730313622786	0.000360674157168711	0.00386198086109756
Vwa5b1	40.6442812910158	0.988826021195747	0.277278496908822	3.56618357434657	0.000362217688538605	0.00387605062652908
9430021M05Rik	106.765946188078	-0.884480141744442	0.248062119556662	-3.5655590757879	0.000363081361331225	0.00388283208830847
Amhr2	6.5113311136774	-1.60449779517157	0.450025309010102	-3.56535013264232	0.00036337075642604	0.00388346746393045
Cxxc4	702.402972897237	-0.44108323231673	0.123724639006227	-3.56503955767882	0.000363801314464845	0.00388560973817418
Frmpd4	5088.13105635823	-0.418796745178807	0.117560163859803	-3.5624035509022	0.000367474931860299	0.00392236517028635
Nudt16	217.864437408108	0.429752387576911	0.120672616124407	3.5613082850036	0.000369011502204921	0.00393627809616696
Isl2	3.8391049283278	-1.95113321080966	0.547925155315788	-3.56094841034475	0.00036951768721552	0.00393918918328363
Peak1	740.512451654712	-0.651148967968605	0.182984016389803	-3.55850188893815	0.000372976109328276	0.00397354863225064
Ccdc105	6.12197557800014	-1.550212945719	0.435995421560378	-3.55557161625911	0.000377158187732327	0.00401556945652464
Pdlim1	71.1573049953853	-0.775246564525119	0.218075737628045	-3.55494184248683	0.000378062703354304	0.00402266339561486
Fgfr4	3.62966665978242	-1.66289723993822	0.468045145069932	-3.55285650851001	0.000381072267848532	0.00405089130634133
A330074K22Rik	19.0375051592948	0.959491690613019	0.270068506831323	3.55277148702233	0.000381195445089209	0.00405089130634133
Nt5c3b	1183.73557073635	0.376720617552856	0.106068186502523	3.55168340267508	0.000382775126613749	0.00406511999245268
Mmab	1011.34073941353	0.404850650843574	0.114026442792516	3.55049794529016	0.000384503137201784	0.00408090507529184
Ada	91.5537520492371	0.73840328488368	0.207983006672845	3.55030584804065	0.000384783837875063	0.00408131902409441
AI607873	3.77695910702432	1.89946522949591	0.535267238572563	3.54862971730038	0.000387241209958789	0.00410480544341752
Tiparp	4205.76402462515	-0.641623983493878	0.180849319395429	-3.54783742420927	0.000388407887034791	0.00411369357284895
Rtn1	31734.8998571812	0.471201301877152	0.132828863992858	3.54743154245819	0.000389006832562855	0.00411369357284895
Sec14l1	2102.68679434618	-0.521844573676486	0.147108517598903	-3.54734438354762	0.000389135562443535	0.00411369357284895
Emx2os	57.3754817543512	0.908486990133668	0.256107199511549	3.5472918835017	0.000389213121913918	0.00411369357284895
Guca1b	4.79927547661577	-1.78523278442413	0.503274519821452	-3.54723458890285	0.000389297780967229	0.00411369357284895
Mir9-2	107.265089672292	-0.723414123640807	0.203991514932324	-3.54629516762403	0.000390688335409776	0.00412580564836115
Lef1	7.73741383464996	1.3077463620849	0.368902590785005	3.54496388681381	0.000392666880759297	0.00414410809281343
Pik3cg	48.2558295586539	1.44576321672209	0.407896357862433	3.54443767112452	0.000393451519522758	0.0041492875909886
Rtn3	23717.0731098953	0.436961362189718	0.123287341549223	3.54425163766922	0.000393729263835785	0.0041492875909886
1700030J22Rik	157.291744552968	0.567571919460553	0.160143727627386	3.54414080319867	0.000393894824609423	0.0041492875909886
Gm2762	38.5296356208893	-0.824341634779239	0.232647034249311	-3.54331460720815	0.000395131019436633	0.00415971470960535
Pcdhgb1	122.674073057626	-0.617481909814964	0.174287170100032	-3.54289939678612	0.000395753645318834	0.00416323188101624
Mid1	295.248609806644	-1.43120729438747	0.403980523173245	-3.54276310933361	0.000395958213959024	0.00416323188101624
Rgs10	904.13557012388	-0.505076723048727	0.142575014261348	-3.54253321078329	0.000396303517577948	0.0041642695692727
Cdh11	1210.28858944024	-0.647047644924309	0.182786836362439	-3.53990286062673	0.000400274333683262	0.00420337835732311
Itih4	4.02915448856638	-1.71558277275675	0.48472133704338	-3.53931762777592	0.000401162850481806	0.00421009067323541
Fpr1	10.1913745064631	1.94785016952409	0.550606849636536	3.53764245906112	0.000403716334351197	0.00423425715643125
Slco1a4	8.5980043978708	-1.3156556082794	0.371928100101012	-3.53739232911436	0.000404098911324148	0.00423563886816857
Tekt2	12.3486001490612	-1.24093514491139	0.351063842743244	-3.53478482778122	0.000408107336288442	0.00427500029811826
Slc35f2	256.480632859114	-0.533649981194329	0.151040620441126	-3.53315538320594	0.000410631051357025	0.00429876995239598
Sema4d	341.233102575086	0.630234422726247	0.178412013497306	3.53246628616611	0.000411702717714295	0.004307318520027
Gng5	330.189027258728	-0.497144721158652	0.140755587179961	-3.53197149128465	0.000412473820901598	0.00431271389457857
St6gal1	401.365518498306	0.525955398297096	0.148972440966475	3.53055501329577	0.0004146887675303	0.00433318968348802
Abi3	2.55195544424696	2.37257576488166	0.672099694286983	3.53009499193223	0.000415410489258251	0.00433804670477107
Abi3bp	5.57361393225229	-1.51746491629028	0.430068993371083	-3.52842204316026	0.000418045059892268	0.00436086205241755
Acsl5	261.940727940037	-0.681590580749434	0.193177189836565	-3.5283181276531	0.000418209220348234	0.00436086205241755
Zbtb5	1144.06055691121	0.273019564695262	0.0773821619210558	3.52819768687509	0.000418399561912809	0.00436086205241755
Plk5	43.0694310608897	0.787403755003427	0.223183651230382	3.52805302118939	0.000418628294857802	0.00436086205241755
Smyd5	1069.93008229881	-0.313618293331342	0.0889250166053443	-3.52677238985743	0.000420658217520509	0.00437930620286764
Pld4	42.2630854805516	1.20765634558383	0.342453928258407	3.52647829658581	0.000421125679388335	0.00438147148623009
Relt	124.44031178373	-0.700468355163545	0.1986444797406	-3.52624123297185	0.000421502845564632	0.00438269522795836
Tlr2	19.8671460600502	1.2660998999667	0.359156810899391	3.52520086364549	0.000423161797034621	0.0043968755813325
Parp12	120.020383019576	0.676723111663077	0.191974937770014	3.52505967457998	0.000423387403484936	0.0043968755813325
Eml1	1544.59366534137	0.384595110296901	0.109204045438315	3.52180277528405	0.000428622895258232	0.00444580045269042
Tmem144	22.4157910069069	-0.90365038199186	0.256587545277589	-3.52180142264601	0.000428625082137865	0.00444580045269042
Gpd2	3151.97260320317	0.464121076007195	0.131812536786662	3.52106929523989	0.000429810280268255	0.00445535690154067
Slc1a5	53.1508245019747	-0.790612368990165	0.224585643248618	-3.52031571365829	0.000431033404393473	0.00446529451937925
A630095E13Rik	3.20370925346738	-2.47422261744258	0.703197510042448	-3.51853153930143	0.000433942231280558	0.00449267229761097
Slc3a2	4439.57391574658	-0.404710905602592	0.115047858609978	-3.51776130814043	0.000435203631612124	0.00450026847814692
Gata6	1.66602605022847	-2.8156038655987	0.800397246277921	-3.51775806162761	0.000435208955632709	0.00450026847814692
Ndc1	716.286623337981	0.395185642144938	0.112410004764622	3.5155735734771	0.00043880515837632	0.00453467803203338
Ccnb1ip1	11.7039435301571	1.11673503118361	0.317804056137971	3.51391056726725	0.00044156145026644	0.0045603710392655
Tas1r2	2.67938210497724	-2.00584325787855	0.571008106123555	-3.51281047741294	0.000443393628005308	0.00457649437805479
Rbfox1	4002.83061448861	0.466636200254984	0.132904938736239	3.51105237090598	0.000446336457711577	0.00460405462731685
Gch1	84.7262824522368	0.882780719031809	0.251491222367239	3.51018501052388	0.000447795006210791	0.00461627989919134
1810032O08Rik	164.419229380069	-0.524510315821586	0.149547759441766	-3.50730975695982	0.000452661893574596	0.00466360508535731
Itgad	6.3528120960655	1.36903511877001	0.390488729589406	3.50595296363492	0.000454975614712368	0.00468458428660551
Rbp7	3.87879776568801	-1.67180258649512	0.476934324616499	-3.50530985128699	0.000456076156390224	0.00469305422108795
Kcns3	140.369739698738	-0.627327193661703	0.178994290410936	-3.50473298461914	0.000457065446548615	0.00470036975056024
Glrx	1316.55008103138	0.45359035950735	0.129452227792617	3.50392084587378	0.000458461607911524	0.004711858010465
Plcb1	4475.76719165636	-0.53643202013905	0.153167071459501	-3.5022672629795	0.000461316618689554	0.00473831655911911
Ccdc28b	1736.08573271458	0.337692258397327	0.0965184283405961	3.4987334978733	0.000467473573028813	0.00479863754052555
Olfm3	972.923194715801	-0.902164302138638	0.258080976246639	-3.49566370702377	0.000472884274441295	0.00485122956149192
Tmem14a	594.943905358566	0.423170571497787	0.121123823826928	3.49370221421056	0.000476372060085676	0.004884042869828
Mef2c	26189.3785398851	-0.572408628458765	0.163871334278016	-3.49303696696363	0.000477560393789734	0.00489325534559068
2610507I01Rik	40.4440492462638	-1.8706057619243	0.535880703006	-3.49071304757051	0.000481733355665926	0.00493301967481796
Dnah17	9.43395826828279	-1.26059360742933	0.361181702478828	-3.49019232917321	0.000482673039488016	0.00493964663320887
Mmp19	58.1174322205246	-0.764923040605222	0.219242589599706	-3.4889345268263	0.000484949915272029	0.00495994201652542
Plat	1660.97789667633	0.464458707422323	0.133166787843557	3.48779688196704	0.000487017905223037	0.00497807769224952
Brms1	316.695229835547	-0.497174938641331	0.142565446969188	-3.48734528043658	0.000487841096196461	0.0049834753480783
Cyp26b1	20.5266516524437	-1.07608373321351	0.308677254483569	-3.48611281713596	0.000490094269889918	0.00500346544217724
Ppef1	65.9260534764114	0.660223951618392	0.189636787689632	3.48151832596397	0.000498579663343846	0.00508701884907805
Tchh	60.6655623413252	0.778291179630847	0.223616696106119	3.48046989864077	0.000500535065120168	0.00510361503062012
Rab20	7.46937973205302	1.25355356498079	0.360183173077996	3.48032239892933	0.000500810737044744	0.00510361503062012
4932412D23Rik	1.6294484392632	3.16838612997481	0.911159911152113	3.47731072361223	0.00050647050161679	0.00515817906532033
Pou3f3	1982.24356294854	0.402072308003493	0.115637133001303	3.47701726571656	0.00050702516611113	0.00516071546410642
Mcf2l	9248.72799338764	0.366008558621203	0.105278296408479	3.47658131929771	0.000507850193593055	0.0051659990174773
Syk	58.6268399672821	1.03687132753513	0.298312617279345	3.47578770550019	0.000509355319415866	0.00517819020087677
Dact1	578.706365309966	-0.613068233986419	0.176436228132543	-3.47472988101893	0.000511367999130866	0.00519552348575439
Tacr1	124.103789238429	-0.728396190650088	0.209704731855085	-3.47343707605721	0.000513837833116312	0.00521747784125198
G6pc2	2.62480496029628	-2.11862668188774	0.610028501768283	-3.47299622189209	0.000514682600412225	0.00522291489817358
Srms	5.44348171525503	-1.63291631187476	0.470237006359887	-3.47253893204875	0.000515560229559809	0.00522867870050867
Dmxl2	16679.0417575875	0.300622814517973	0.0865852844627577	3.47198506516749	0.000516625076921497	0.00523633316260288
Stx12	5262.20831499602	0.313326999629025	0.0902606395549621	3.47135807118042	0.000517832989877147	0.00524487769289191
Gm9992	7.35632771145361	-1.25757690229311	0.362293833292377	-3.47115182962065	0.000518230892210919	0.00524487769289191
Arhgef15	24.3578943109728	-0.990453976340716	0.285345905345871	-3.47106426896217	0.000518399909359031	0.00524487769289191
Cadps2	1357.01305143211	-0.776704636551548	0.223874780700301	-3.46937084258416	0.000521678829761488	0.00527489144871406
Slc22a15	179.92815055063	0.490310760861994	0.141349442278453	3.46878454529803	0.000522818553339123	0.00528325199981115
Il1r2	13.2838433261703	1.13775435853514	0.328017453364021	3.46857872002471	0.000523219214238694	0.00528413854762834
Zfp105	151.538407073781	-0.517394709128758	0.149186192309758	-3.46811391267687	0.000524125064442636	0.0052901230353726
Dll1	181.314306383755	-0.533260308595533	0.1538049674929	-3.46712019311176	0.000526066601830838	0.00530654757378467
6330403A02Rik	5024.47766521072	-0.598876474781476	0.172830794650753	-3.46510282494305	0.000530028784579802	0.00534332301875494
Nipsnap3b	1483.42665620336	0.303501401458243	0.0876172524423922	3.46394566136153	0.000532314027311337	0.00536315910810217
Tnfrsf11a	69.2121066943113	-0.712665870912587	0.205804053190859	-3.4628369065777	0.000534512279238257	0.00538209561551413
Gm438	4.93227345649438	-1.64383490734739	0.474855356331597	-3.46175921873667	0.000536657040784463	0.00540047126977738
Fuz	184.798438075019	0.464461426671686	0.134178382028085	3.46152203992497	0.000537130137748368	0.00540201280882605
Psd2	1479.11084931371	0.380396391442488	0.109983518218966	3.45866724035102	0.000542855133639827	0.00545634034919174
Gm10754	29.9936779237831	0.826491616305246	0.238998141758417	3.45815080495762	0.000543896842480257	0.0054635586449266
Emx2	67.7385902928158	0.69903761897149	0.202164300939087	3.45776982248766	0.000544666520745693	0.00546803737771211
Plek	242.579204723184	0.712166614842329	0.206031446873136	3.45659182445506	0.000547052790445581	0.00548873049284853
1700001J11Rik	5.40973392218237	1.42763140708405	0.413162387317413	3.45537602382781	0.000549525847281023	0.00551026927386422
Synpr	2198.68356609141	0.641218031196582	0.185697702367202	3.45302081298038	0.000554346230116278	0.0055553059001445
Adam23	2922.1801467291	0.448185052252436	0.129821487763689	3.45231794807541	0.000555792388500733	0.00556649482338279
Piga	156.356108014373	-0.549579110311062	0.159203512645796	-3.45205392253996	0.000556336533587947	0.00556664955390383
Ercc6l	40.0782863305746	0.781015886958191	0.226250874518297	3.45199057736693	0.00055646715900685	0.00556664955390383
Cd37	1.60397074557975	3.23882525925838	0.938921264192819	3.44951742257404	0.000561589490482766	0.00561456491195499
Mcu	519.323005146038	-0.574021752795656	0.166426637887012	-3.44909781320802	0.000562462919341609	0.00561996973727954
E130311K13Rik	325.879782579184	0.39672071717297	0.115129583520364	3.44586252327403	0.000569239871498403	0.00568431961568423
Hmha1	5.26824235727606	1.59978645658778	0.464403857877343	3.44481732753027	0.000571445439345625	0.00570297144727554
Serf1	1031.78704520512	0.346113923000508	0.100485701384239	3.44440968448864	0.000572307801049018	0.00570820409244756
Myadml2	35.4081774842571	-0.803013161372645	0.233351542786719	-3.44121642301115	0.000579105135053514	0.00577259109239294
Plp2	105.258655329504	-0.723657435533908	0.210322015871336	-3.44071177016773	0.000580186217235157	0.00577995543612558
Vps13c	2418.30512946069	0.464243796627145	0.134994316651618	3.43898771549936	0.00058389372920371	0.00581346079677703
Gnl3	1444.94764155361	-0.375608295347127	0.109231166479188	-3.43865498697841	0.000584611783177402	0.00581718006525257
Wls	2370.8603055483	-0.489534759987388	0.14243013943009	-3.43701664511582	0.000588159457463883	0.00584903451044472
Clic3	5.88264874977694	-1.28661412680266	0.374389168571124	-3.4365687760495	0.000589132757966627	0.00585447804330828
Gbgt1	5.68353687299028	-1.31749774439771	0.383389646803032	-3.43644580750659	0.000589400253086822	0.00585447804330828
Atp6v0a4	14.1122597185724	-1.05375682248601	0.306826538745788	-3.43437313732196	0.000593926008288316	0.00589514395266368
Ank2	23919.9315900714	0.551624906319564	0.160624491303473	3.43425153812541	0.000594192526793414	0.00589514395266368
4933405O20Rik	1.63908788050649	-2.71929051986945	0.792157353134625	-3.43276561040432	0.000597458355871083	0.00592406447283565
Elovl2	1389.64658934831	0.457301554694323	0.133223713609261	3.43258375183541	0.000597859197135281	0.00592456009555538
Wdr35	1657.20425652781	0.285145997135857	0.0831160251472067	3.43069819124332	0.000602030009451761	0.00596239222264072
Fsip1	48.2122586649506	0.692480278784662	0.201894573670138	3.42991030514797	0.000603780802470084	0.00597622662984164
9130008F23Rik	4.62695471894858	1.46687318972195	0.428175421507263	3.42586966939453	0.000612834365647805	0.00606228535344396
Plcxd3	727.884576596131	-0.596979664269646	0.174281695722061	-3.42537213558957	0.000613957847857992	0.00606984321951408
Henmt1	15.1650433977971	0.974262623732288	0.284461445202139	3.42493733391523	0.000614941243514767	0.00607600809712718
Laptm4b	1094.6564877524	-0.513777227231624	0.150020956207484	-3.42470305629204	0.000615471719188944	0.00607769324574533
Thbs1	563.705947589111	-0.891546294350717	0.260400239585657	-3.42375374066216	0.000617625619556434	0.00609539813666274
Fam64a	34.5133933572809	0.750093938887323	0.219261060395429	3.42100844324367	0.000623893953116347	0.0061512111160933
Ahr	469.982176598854	-0.427939787007275	0.125093549179617	-3.42095807348796	0.00062400951331682	0.0061512111160933
Cryba4	3.95971542931605	1.81363390983869	0.530325012383205	3.41985361333134	0.000626548418791985	0.00617263512235791
Tubb5	42394.3993488973	0.437492129035664	0.127943954815635	3.41940445459953	0.000627583679949005	0.00617922916595854
Pkib	141.793663635504	-0.763767429288584	0.22337617747339	-3.41919822394475	0.000628059551680697	0.00618031094969711
Spag4	114.446318835261	-0.628502494458972	0.183861711640455	-3.41834354119372	0.000630035289973364	0.00619544049399851
Fam196a	553.401966136624	-0.488720520156141	0.142975322401603	-3.41821589870856	0.00063033085210763	0.00619544049399851
Atl1	2506.30318542961	0.34672596439301	0.10145132178171	3.41765842281533	0.000631623226098099	0.00620453158574317
Ppfia3	2110.69957494328	-0.500788275948159	0.14655425904242	-3.41708442470585	0.000632956478234239	0.00621401342526939
Fermt3	24.2787906436403	0.977481177898843	0.286182403130143	3.41558798587043	0.000636444645864309	0.00624462771067096
Micu3	1492.45643596113	0.332590890685707	0.0973962220229195	3.41482332453759	0.000638233950561579	0.00625854732240582
Rrp1b	420.969643181239	-0.412208057999154	0.120737299927453	-3.41409041155332	0.000639953355073891	0.00627176573057325
Soat1	561.40017151769	-0.41765901039445	0.122347808290518	-3.41370242941098	0.000640865299381452	0.00627706000310627
Gm16039	504.925028281369	0.344862389060959	0.101093356913465	3.41132592279193	0.000646477660639843	0.00632836045076196
Cep120	2327.24655740561	0.336503726142507	0.0987446246528064	3.40781817061617	0.000654845151228728	0.00640655574950655
Cd200r1	6.11238291992259	1.4380329702273	0.422263770453331	3.40553244405379	0.00066035166577587	0.00645668687220113
Gbp8	3.36902204077945	1.91745401823865	0.563098333822185	3.40518503264502	0.000661192369749685	0.0064591264039112
Deaf1	3337.86827716862	0.367432300572089	0.107906044021071	3.40511325297347	0.000661366194028335	0.0064591264039112
Nkx3-1	20.8350169415574	-0.897934301735834	0.263731521133649	-3.40472878583519	0.000662297957257625	0.00646448746026142
Fam203a	255.244409343201	-0.410009436444761	0.12044190676265	-3.40420911180648	0.000663559336932439	0.00647305774895504
Slc12a3	8.84062206254765	-1.30287102033342	0.382746613250301	-3.40400404661816	0.000664057696113396	0.00647417913196928
Lrrc25	8.24060764576155	1.52563986187253	0.448364393161823	3.40267845783619	0.000667287610354373	0.00650191493851352
Mkrn3	1027.76172719054	0.471654533685826	0.138714865027315	3.40017296338753	0.000673432399064035	0.00655800431983581
Pim3	735.058036249949	-0.467464113156488	0.137497072078971	-3.39981140026023	0.000674323472833439	0.00656289692349594
Tmem178	779.075652154338	0.66326790855183	0.195114452003443	3.39937868128869	0.000675391351365372	0.00656890203424055
Pcbd2	122.363824828911	0.461755136962351	0.135840449523062	3.39924623765292	0.000675718514359578	0.00656890203424055
Tmem132c	134.054295438299	-0.602830810490178	0.177436116111077	-3.39745269284862	0.000680163469582847	0.00660830860033139
Fbxo10	1300.20190584289	0.411227541057722	0.121046208991874	3.39727732477212	0.000680599541203616	0.00660874287105478
Gm9866	63.2210673787049	-0.70292266146339	0.206922312583327	-3.39703656260039	0.000681198645624777	0.00661075881035632
Ikzf1	15.3259754259058	1.96349608349405	0.578031724454542	3.39686560516534	0.00068162434789838	0.00661109060230445
Rgs7bp	3520.25035500298	-0.475094847550781	0.139895317200876	-3.39607398629785	0.000683598789122607	0.00662643464588079
Ptx3	26.879437200647	-0.899513689410079	0.26492937467731	-3.39529616338584	0.000685543997736481	0.00664147788053828
Cnrip1	6519.0592245605	0.25816873538831	0.0760490862174737	3.3947644637049	0.000686876651382284	0.0066505728986475
Ptprt	1544.53625893645	-0.691824412770169	0.203869860191506	-3.39346096632579	0.00069015393545813	0.00667736315864857
Syndig1l	108.378562351436	0.593679318332614	0.174953770504356	3.39334966386354	0.000690434447175198	0.00667736315864857
Mroh6	4.74814851578644	-1.44558866929536	0.426047810943367	-3.39301982586062	0.000691266348847333	0.00667858039815717
Rab36	409.754231794885	0.452331203062439	0.133313601244275	3.39298615325542	0.000691351328673382	0.00667858039815717
A330050F15Rik	122.325965719166	-0.822334210457545	0.242386566045615	-3.392655887962	0.000692185336666286	0.00668281394793992
Dhrs11	28.3634170280825	-0.843126177499844	0.248565893681067	-3.39196244912688	0.000693939498488901	0.00669155002301169
Zc3h12a	7.66976357345871	1.22140616423575	0.360089485087802	3.39195176426195	0.000693966559816065	0.00669155002301169
Notch4	30.0875505244194	0.761345125430466	0.224464516340777	3.39182841832608	0.000694279026431155	0.00669155002301169
Wnk4	9.40966465271824	-1.12682994718226	0.33243373574376	-3.38963777145296	0.000699850320977278	0.00674079553583976
1500004A13Rik	1474.27481415857	0.329393496128969	0.0971803855283384	3.38950596190953	0.000700186863073726	0.00674079553583976
Gm5468	245.843526652091	0.539461446009022	0.159232414040742	3.38788712875377	0.000704332425836181	0.00677402592916188
Stxbp6	543.938910491725	-0.653625291929756	0.19294050678169	-3.38770382037674	0.000704803282962694	0.00677402592916188
Ube2g2	1172.88657564709	-0.348971608882044	0.103014890443967	-3.38758413835192	0.000705110863357565	0.00677402592916188
Lyz1	15.3335349982586	1.23557014034386	0.364750190502085	3.38744206999063	0.000705476138096192	0.00677402592916188
Galnt13	857.322142160582	-0.455506730582844	0.13447196231202	-3.38737326912741	0.00070565309652866	0.00677402592916188
Serpinb7	4.71611123055867	-1.52210940572796	0.449368236306618	-3.38722073068238	0.000706045578308948	0.00677402592916188
Ocrl	1614.96911081282	0.311747714977568	0.0921235351578226	3.38401814958027	0.000714332810000372	0.00684964442343343
Cd46	80.7854865594403	0.56034637863103	0.165620768671928	3.38330985373578	0.000716177810768063	0.00686343842941516
Tcp10b	9.21173343039832	-1.198812288741	0.354398492873237	-3.38266757011803	0.0007178546866912	0.0068742254762254
Osbpl9	2154.93105366746	0.386823896465358	0.114358088682424	3.38256699567253	0.000718117596829421	0.0068742254762254
Resp18	208.27674108617	0.777161086646497	0.229773729039052	3.38228869721835	0.000718845558943562	0.00687729524550764
Rapgef2	5733.17509121932	0.378573782594387	0.111940852657676	3.38190904934499	0.000719839732473451	0.00688290697765951
Kiss1r	173.587042294909	0.476995897470378	0.141107342988213	3.3803761545579	0.000723866887854129	0.00691749647329079
Cib2	144.545941879967	-0.52823130628209	0.15628748730882	-3.37986946605852	0.000725202634028221	0.006926341446946
Mllt11	18009.239984888	0.29983025339633	0.088733385012251	3.37900163906667	0.000727495744141103	0.00694095467131284
Reep5	13323.8901399753	0.26965103433327	0.0798025106150088	3.37897933605307	0.000727554765381009	0.00694095467131284
Dpcd	681.492199710792	0.522056539823143	0.154574797710677	3.37737165149194	0.000731820972616802	0.00697771255991379
Shroom1	11.287992372563	1.12670588002707	0.333634568347585	3.3770657687163	0.000732635300265129	0.00698153480828272
Eno2	6141.88011468234	-0.559221508240669	0.165662174256223	-3.37567408342561	0.00073635091180694	0.00701126801921773
March1	3514.10183313634	-0.45865669211443	0.13587467564934	-3.37558628878066	0.000736585897553728	0.00701126801921773
Psip1	7057.6954373909	0.338147303935779	0.100223420929907	3.37393496249015	0.000741018732153876	0.00704948862600019
Pepd	1179.92229001851	-0.32982459116849	0.0978356296999325	-3.37121141019976	0.000748384027875975	0.00711554768846493
Vmn2r55	3.73486633061886	-1.70634242302612	0.506233839309557	-3.37066053378291	0.000749882003495952	0.0071257780028321
9330179D12Rik	23.4563515823648	-0.849765383411443	0.252132697526569	-3.37031012537316	0.000750836303088143	0.00712831254465137
A830018L16Rik	4614.35943742325	-0.518777472637884	0.153928364044768	-3.37025262275252	0.000750993012965461	0.00712831254465137
Specc1	632.88044709398	-0.399353847778875	0.118547219345636	-3.36873230754167	0.000755147308535425	0.00716371766962314
Asprv1	19.8442986161326	-0.920153221343367	0.27317948216245	-3.36831014562135	0.000756304655209395	0.0071706683929623
Ano3	166.2142788611	-0.676979177470416	0.201103228777776	-3.36632674465159	0.000761764180802226	0.00721837820259618
Arhgap28	92.6693708564819	-0.678012516121046	0.201439131351566	-3.36584312875004	0.000763100923520256	0.00722698945292375
4833418N02Rik	24.4684182902669	0.835627883672923	0.248330509137077	3.36498276662278	0.000765484400149612	0.00724125356489206
Nupr1	42.4215291088366	-1.03086118669308	0.306352480175365	-3.36495133351944	0.000765571610575494	0.00724125356489206
Capn5	1176.65025809884	0.508104501513205	0.151004270188751	3.36483531808796	0.000765893572598438	0.00724125356489206
BC061194	6.55997630343004	-1.18168108034739	0.351236570160248	-3.36434523263982	0.000767255028509457	0.00724714283030994
Spryd4	404.870388047117	-0.376238101161864	0.111832435024797	-3.36430214613891	0.000767374830071904	0.00724714283030994
Poglut1	1593.99608972138	0.341242386833633	0.101508847239144	3.36170093656668	0.000774639724071263	0.00731166371194374
Gm14085	4.64470288478813	-1.81009456300908	0.538579994755866	-3.36086483091445	0.000776988402075379	0.00732973528348874
Tspan33	367.415007946422	0.411590704414201	0.122524961886115	3.35923960373699	0.000781572701123972	0.00736886467402535
Gm5820	57.9355818933001	0.728768844531999	0.216964095579811	3.35893753565285	0.000782427510414506	0.00737280744467598
Clu	1722.6170677522	-0.455057627048577	0.135504612253273	-3.35824456069454	0.0007843918101281	0.00738719470486509
Gucy1b3	5645.12652437581	-0.40830075213108	0.121619372581816	-3.35720159924691	0.000787356808441138	0.00741098498736736
Inpp5d	49.3640146995749	0.89125241796163	0.265510650175481	3.35674827873226	0.000788648777914872	0.00741901017485824
H2-Ab1	5.79178670905659	1.24200498511129	0.370027946254904	3.35651671091809	0.000789309508295876	0.0074210915128531
Yes1	762.473660674406	-0.429327092189812	0.12797660352643	-3.35473110208889	0.000794421651992351	0.0074649994521663
Ccdc28a	192.546495535655	0.481609964724283	0.143614021955692	3.35350238205063	0.000797957269682676	0.00749405253384965
Tcf4	21205.3900070822	0.500883275923643	0.149371224969735	3.35327822360116	0.000798603854155715	0.00749411770215128
Ccdc23	525.580110854697	0.406471739263808	0.121219334466746	3.35319230262988	0.000798851821856704	0.00749411770215128
Fgf17	6.78307055198158	-1.23407050824186	0.368086567331657	-3.35266379642135	0.000800378661591748	0.00750427211529054
Calcr	13.079124796585	-1.05357142294172	0.314479815762216	-3.35020363831028	0.000807521699380068	0.00756651674102022
Dmbx1	3.97655893951053	-1.70996591810098	0.510427038459221	-3.35006923469944	0.000807913637573106	0.00756651674102022
Cdv3	5100.01823925651	-0.231953253996667	0.069264998522853	-3.34878017676038	0.000811681671557751	0.00759759240904888
Atp1b3	1644.2722365427	0.327360804272144	0.0978117375019874	3.34684581454749	0.000817366592707782	0.00764656636258371
Gpr101	38.7763480321272	-0.801099438732226	0.2395117116985	-3.34471927510859	0.000823658922576248	0.00770116531928158
1700001J03Rik	3.32057515102297	-2.10234495926208	0.628597692371673	-3.3444999636095	0.000824310404912177	0.00770299142077865
Rbms1	409.990919734066	0.561849558280333	0.168055993586079	3.34322832700728	0.000828097334801453	0.00773409933377065
9330159M07Rik	48.7911563932324	-0.679040006846783	0.203221314703867	-3.34138182225755	0.000833624960051479	0.00778142126889402
Alg2	5598.408674507	0.263878435238389	0.0789858556047392	3.34083150987043	0.000835278962359708	0.00778829488172217
Fbxo30	586.209745354371	0.363080583902955	0.108679757459592	3.34082990604715	0.000835283787208271	0.00778829488172217
Kit	836.820556135748	-0.600408452879238	0.179792296598731	-3.33945594020225	0.00083942665680534	0.0078213147816272
Pamr1	116.512512101558	0.644168744025251	0.192902522354342	3.3393484759208	0.000839751492306651	0.0078213147816272
Map2k4	5567.25784210945	0.299133821624675	0.0896567905281163	3.33643240922022	0.000848610607587156	0.00789947007702134
Col19a1	950.033714683702	-0.666561649578147	0.199812284390971	-3.3359392872657	0.000850117270567773	0.00790913511339251
2610203C20Rik	665.931490148151	0.534294782308367	0.160174548397676	3.33570337892782	0.00085083893142192	0.00791149019603003
9430041J12Rik	43.0193845369073	0.674461209282536	0.202220886059721	3.33526977566181	0.000852166837541456	0.00791947673017338
Izumo4	354.804904368026	0.388774287985614	0.116573581754183	3.33501194812231	0.000852957343014307	0.00792246297807458
Serpinf2	3.12957197877878	-1.75366431690563	0.525932212229115	-3.33439229643852	0.000854859992168846	0.0079357701087208
Aoah	13.4506211790009	2.01712408565935	0.60503825156159	3.33387861090302	0.000856440253806001	0.00794510240658959
BC053393	3.64925685843766	-2.06055173723886	0.618086453904848	-3.33375974221897	0.000856806317801708	0.00794510240658959
Mycbpap	8.36732903799887	-1.27422358119488	0.382283045025551	-3.33319407641978	0.000858550312128872	0.00795515129281307
2900076A07Rik	209.547380936869	0.431559129309806	0.129476695708048	3.33310274061141	0.000858832216439549	0.00795515129281307
6030458C11Rik	1201.8627363959	0.390741778177749	0.117257039023194	3.33235242363964	0.000861151290658264	0.00797225915244268
Mavs	116.360471121344	0.508243648176553	0.152577078050067	3.33106161601664	0.000865154502027713	0.00799952359610412
Irf5	13.6012957810926	1.12428562169202	0.337520974175409	3.33100964892254	0.000865316029534295	0.00799952359610412
Cdkn2a	10.3172581245199	0.981089439924133	0.294537884026906	3.3309448228212	0.000865517565443695	0.00799952359610412
Zfp600	6.45815664434959	-1.26310715616091	0.379285098709957	-3.3302314286985	0.000867738291653893	0.00801566126524488
Ccdc34	247.555867190453	0.415045926477924	0.124636105998826	3.33006172771343	0.000868267331524745	0.008016163018112
Palm2	2216.53916564434	0.590846605815252	0.177453329069535	3.32958873701225	0.000869743450650469	0.00802367881808201
Kynu	3.18332026851794	2.01829112140687	0.606185095117915	3.3294964486289	0.000870031737291731	0.00802367881808201
Pls1	78.4202021948207	-0.756389409414548	0.227219053056359	-3.32889957615894	0.000871898363372869	0.00803650423794447
Nxpe2	2.40243398788734	-2.10654351062764	0.633120909825292	-3.32723730639214	0.000877116442283206	0.00808018998603067
Tbrg4	463.57130069206	-0.378393820423944	0.113753226870357	-3.32644471576348	0.000879614666613221	0.00809878585628727
Hdac11	3590.94172331928	0.395758077690992	0.119028731685605	3.32489536002386	0.000884517256063419	0.00813948685879395
3110052M02Rik	806.560625116668	-0.579986869321201	0.174520112733231	-3.32332394380103	0.00088951551548873	0.00817757631613437
1110015O18Rik	133.044240142937	0.743912679352707	0.223848284512671	3.32328961542968	0.000889624996608956	0.00817757631613437
BC005624	1263.34625556841	0.258036580523004	0.0776529872039987	3.32294467751933	0.000890725776965572	0.00818188178635039
Myl1	7.6401599575025	-1.44208789801616	0.43399267521522	-3.3228392559875	0.00089106245440592	0.00818188178635039
Abca12	24.90786813279	0.988465797119395	0.29755859630073	3.3219198148132	0.000894003814756359	0.00820442848694341
Impact	7162.58466672025	0.425571951766397	0.128145874375126	3.32099612134687	0.000896967838616379	0.00822715856755903
Csrnp3	8263.10985003604	0.461542018259471	0.138999820885364	3.32045045324278	0.000898723100591449	0.00823878299488991
Aldh7a1	846.164751161504	0.426946617299691	0.128616541282558	3.31953116638187	0.000901687391144307	0.00826147221207964
Tnfrsf12a	337.383343372863	-0.652954637579616	0.196736486902776	-3.31893004627198	0.000903630633030682	0.00827478680550765
1700001G17Rik	11.4549397648477	1.11362628784962	0.335849050522912	3.31585361374617	0.000913636726454272	0.00836188063030181
Igfbp5	2849.44774853556	-0.960176514083711	0.289651692781462	-3.31493493051376	0.00091664459223572	0.00838486488867409
Sox4	2375.68758829762	0.553823356496433	0.167084042569171	3.31463943522407	0.000917614023743659	0.00838918809146477
Fuk	127.947259235151	-0.635173923355105	0.191646767530796	-3.31429499979976	0.000918745212248325	0.00839498466126905
4930444M15Rik	2.66783792323463	-1.82991381362759	0.552243886025049	-3.31359723472717	0.000921040760924897	0.00840858664327965
Gadd45a	51.4342912509768	-0.720432998706653	0.217429969094584	-3.31340247945883	0.000921682426352342	0.00840858664327965
Smarcd3	1710.714149558	0.398636597031109	0.120310844218488	3.3133887441366	0.000921727696121677	0.00840858664327965
Akap6	14276.0059391167	0.432097365681974	0.130434127811856	3.31276310066066	0.000923791918241229	0.00842286734957959
Arhgef10l	669.638254727438	-0.471942433337533	0.142479337706239	-3.31235701214848	0.000925134041388561	0.00842683033861209
Tpgs2	2298.73603446638	-0.298939447135255	0.0902505130178574	-3.3123296160777	0.000925224650467062	0.00842683033861209
Tox	46.753226425026	-0.740569864216021	0.223804072720943	-3.3090097745425	0.000936265683807442	0.00851955260058813
4930451G09Rik	109.757770773214	0.54492536385428	0.16468302227568	3.30893468145171	0.000936516832177493	0.00851955260058813
Gm11992	29.0741142088496	0.783074842355486	0.236663260415242	3.30881456201325	0.000936918700656884	0.00851955260058813
N28178	1894.84473504889	0.333449339498028	0.10079823225754	3.30808717603363	0.000939355639180258	0.00853711481334652
Zfp663	21.237606201077	0.838282600656073	0.253640411133539	3.30500410762513	0.000949750080318237	0.00862693913730702
Dpysl2	38835.1131839697	0.448382701395331	0.135703658260536	3.30413127503523	0.000952712092777678	0.00864577111667167
Slco5a1	635.243209705441	0.586405769861502	0.177478672370813	3.30409148337724	0.000952847331998459	0.00864577111667167
Cdc42ep3	783.87484618631	-0.546474574804422	0.165423973508922	-3.30347871117331	0.00095493219693863	0.0086600349503253
Rsg1	24.7339458333675	0.847488838750144	0.256579472181611	3.30302666672523	0.000956472917308493	0.00866935141259861
Sh3kbp1	2243.36791743477	0.349861760242815	0.105957497805998	3.30190658978555	0.000960300444328227	0.00869937408955281
Gm2694	10.9731078769646	-1.01230051580447	0.306606708677263	-3.30162546074629	0.000961263343105628	0.00870342778106254
Zfp40	1460.74756380649	0.553062790133055	0.167561308375224	3.30065929596687	0.000964579388511	0.00872877146537875
Stat6	39.5238084040149	-0.837134639912103	0.2536972215938	-3.29973909313228	0.00096774753195706	0.00875275030778089
Ccdc11	15.7957375848829	-0.887503285986001	0.268985970801239	-3.29944079738568	0.000968776593448172	0.00875736700051704
Il33	14.3022097380645	-1.12586936087128	0.341281157123051	-3.29894967059474	0.00097047309204	0.0087680088989767
Pcyox1	3382.35912667497	0.34679588137648	0.105150252693539	3.29809841149139	0.000973420113755784	0.00878993157266319
Icam5	1266.23023350993	-0.649005028717767	0.196820835160118	-3.29744068096138	0.000975702821062864	0.00880349993243751
Tvp23a	1593.22094989546	0.281443623384171	0.0853540975451139	3.29736511167978	0.00097596540764675	0.00880349993243751
Lamc2	75.6699487991775	-0.796259461975819	0.241774204966149	-3.29340122155423	0.000989831149343505	0.00892380607998635
Alpk3	14.450730223422	-1.03908722087804	0.315584737046598	-3.29257755176104	0.000992735149318865	0.00894521116936946
2410018L13Rik	72.4084809404318	0.6448960768004	0.195883037766096	3.29225074388763	0.000993889555041697	0.00895083681409819
Baiap3	50.4585901432677	0.746500873179658	0.226778433401976	3.29176307456207	0.000995614493829054	0.00896159186716279
Mlh3	987.061961402593	0.322989519975648	0.0981982616205612	3.28915720752453	0.00100487879280003	0.00904016158509396
Gucy2g	2.40678877959471	-2.05699399412244	0.625635208295115	-3.28784884042546	0.00100956029212611	0.00907744147648639
Tprkb	1122.78294324805	0.359502516472416	0.109374048056583	3.28690875815838	0.00101293647827151	0.00910295123581302
Ctsc	77.0388265951266	0.774477789913374	0.235930239982789	3.28265588154309	0.00102834112907982	0.0092354332308041
Pirb	18.1409117534955	1.79798983517837	0.547743852351906	3.28253768154248	0.00102877235029862	0.0092354332308041
Ngfrap1	4134.85199830623	0.341603547287947	0.104097655572201	3.28156811419267	0.00103231588013329	0.0092623198469345
Pdia5	67.7642871268489	-0.659336844644755	0.200946820262191	-3.28115092234088	0.00103384408654277	0.00927110528165758
Cnga4	11.9538454957873	-1.0053149002485	0.306534517433739	-3.27961401758224	0.00103949196968169	0.00931680541403663
Hgd	2.43305737976904	-1.86826114449097	0.57011388458833	-3.27699639492207	0.00104917709000764	0.00939862299303396
Col11a2	168.895681835388	-0.673897718055731	0.205669460814797	-3.27660565348867	0.0010506299619955	0.00940664768730439
Fut1	2.52596737741661	-1.95676631203539	0.597382655518351	-3.27556599435833	0.00105450473895364	0.00943633652462698
Riiad1	68.4927144788737	0.679097838153862	0.207447131212302	3.27359474284014	0.00106188785541945	0.00949616418002837
Cntnap3	664.592447475767	-0.641712687668971	0.196033726855468	-3.27348103799555	0.00106231518039048	0.00949616418002837
Ifi44	2.46135331399861	2.35765896948197	0.720265278070156	3.27332031859008	0.00106291946660923	0.00949653868421347
2810408A11Rik	49.8309878319728	0.669158001204535	0.204454205981119	3.27289917071372	0.001064504442254	0.00950567002215814
Ccdc136	1050.27614186639	0.343957341867661	0.105127461179166	3.27181250274334	0.00106860418468225	0.00953723586815251
Tjap1	180.963878781148	-0.560381367164521	0.171299761282729	-3.27134937590261	0.00107035588825303	0.00954782331169604
Ppp2r5a	2549.56680923032	-0.331757346588014	0.101432071812933	-3.27073420327901	0.00107268678840173	0.00956124764840455
Rpn1	6757.93462242766	-0.337886484563079	0.103308557117704	-3.27065340945677	0.00107299326623988	0.00956124764840455
3110035E14Rik	11270.0371159748	0.449324765663986	0.137416886188079	3.26979294996545	0.00107626230394777	0.00958257893450809
Apoc1	7.44558637659664	1.28552478707086	0.393159949713513	3.26972467060187	0.00107652210344438	0.00958257893450809
Slc6a15	3651.02578376765	0.294258497251989	0.0900017742667913	3.26947440369032	0.00107747485233893	0.00958600651032411
Ccdc13	98.9691983644708	-0.603581368109353	0.184637224134828	-3.2690123616059	0.00107923586419979	0.00959661758971965
Aamdc	590.857342946458	0.374542437689582	0.11466011684467	3.26654505504276	0.00108868482373507	0.00967554312294235
Ramp1	86.9015487876452	-0.883292217453662	0.270453528701543	-3.2659666956256	0.00109091078881405	0.00969022597575697
Gsta4	489.582700949724	-0.348673706692235	0.106781615667302	-3.26529716293668	0.00109349291424159	0.00970805538900286
Arl5c	18.460007298094	-0.914021654056677	0.280095718667225	-3.26324750126796	0.00110143283604923	0.00977340770863234
Zfp54	142.157575403956	-0.605087968668798	0.185481761102372	-3.26225050416054	0.00110531421848543	0.00980269742297528
Lpcat2	43.6952619909387	0.663203217242614	0.203488955486461	3.25916075227355	0.00111742332716741	0.0099048872979259
Tll1	245.030534513998	-0.766945642497632	0.235370975498328	-3.25845461987763	0.00112020790932613	0.00992436031315896
Zdhhc14	259.037711097256	-0.579062036780511	0.177776737898882	-3.25724300954311	0.00112500076014258	0.00996159561393158
Dmrtb1	56.0322869535093	0.742941199489212	0.228202107700501	3.2556281227002	0.00113141835593057	0.0100131710472975
Slc22a5	600.469784292571	0.309553410462161	0.0950923598696774	3.25529212742642	0.00113275785467587	0.0100167372547757
Slc1a1	3037.82975252246	-0.369535369979982	0.113520527650771	-3.25522949573316	0.00113300770796053	0.0100167372547757
Col15a1	24.6162097139875	0.911988108525229	0.280221839152172	3.25452188624735	0.00113583407832975	0.0100364700401236
Susd1	200.656921073784	-0.471054975271111	0.144749569072486	-3.25427549311199	0.00113681976340415	0.0100396369545388
Cd209f	1.67258213326422	2.92313970552937	0.898284668136915	3.25413514136014	0.00113738158794461	0.0100396369545388
Cdt1	158.381971968362	-0.689443714534114	0.211996715805349	-3.25214337361314	0.00114538230008738	0.010104976760332
1500009L16Rik	663.298201507003	0.328980731528229	0.1011685145621	3.2518094483466	0.00114672872197223	0.0101115724277927
Ccdc116	93.4793150140514	-0.579245380717906	0.178173732628602	-3.2510144574752	0.00114994009855669	0.0101345973404114
Cyld	1948.28134968334	0.37048719457927	0.113983683311919	3.25035289099603	0.00115261884013247	0.0101529064864251
Gm10638	30.313697927278	0.735206499882801	0.226260735289551	3.2493773121613	0.00115657957035854	0.0101824831204767
Dkkl1	7.60361405711362	1.13419662833167	0.349111286985099	3.24881111156992	0.00115888404007805	0.0101974548727243
2610035D17Rik	226.356610221446	0.614200069986986	0.189259972797477	3.24527189192945	0.00117338530544655	0.0103196793061304
Leprel1	17.5772523718703	-0.91387535675452	0.281632635593618	-3.24491994625651	0.0011748364633037	0.0103270632583791
Ndor1	449.881031687365	-0.358760369659895	0.110570022024737	-3.24464410054682	0.00117597500152136	0.0103316929634182
Nwd1	567.474778191162	-0.492462210559466	0.151783905723576	-3.24449557554754	0.00117658845259264	0.0103317070257303
Gpr123	1070.42194107286	0.492042037588626	0.151680456076505	3.24393827864316	0.00117889288678234	0.0103465619990679
Jmjd6	837.896716934203	-0.351666066307684	0.108438942750064	-3.24298685868067	0.00118283666757509	0.010375781801908
Mdga1	681.611348613266	-0.926136724134865	0.285724649943429	-3.24136095474517	0.00118960451502722	0.0104297309661213
Commd1	781.981949781241	0.335298082541565	0.10344934922099	3.2411811680448	0.00119035507236133	0.0104308955640339
Fkbp1b	1143.06121564202	0.399879547886596	0.123388527149109	3.24081628272749	0.00119187970796968	0.0104355514578876
Plcxd2	4983.59249717438	-0.523740703581888	0.161610544388637	-3.24075824113561	0.00119212239501748	0.0104355514578876
Tpx2	189.734643185614	0.50141754743656	0.154782969141586	3.2394878468696	0.00119744569385218	0.0104716195521946
Marcks	10060.0872785505	0.452089408319489	0.139556210254642	3.2394789704778	0.0011974829654914	0.0104716195521946
Cd83	60.355877805202	0.692980107262663	0.213988215571003	3.23840313081506	0.0012020083215343	0.0105006378701752
Laptm4a	4588.59838421724	0.377212213441263	0.116483189939174	3.23834034454446	0.00120227290971991	0.0105006378701752
Entpd8	2.87677084691142	-1.99508504372821	0.616100354261803	-3.23824686989294	0.00120266692176471	0.0105006378701752
Ddx19b	1947.78434994571	-0.235511747428571	0.0727416704585268	-3.23764557431832	0.00120520434106225	0.0105173542652078
Smad3	263.989920176717	-0.498074790723969	0.15389471072925	-3.23646464757482	0.00121020215741476	0.010555513238691
Acbd4	285.234438406668	0.448997296186268	0.138924703257898	3.2319471314814	0.00122949801439312	0.0107182774760156
Gm12603	4.7161601535652	2.67332275943702	0.827404076594813	3.23097605518103	0.00123368274381733	0.0107492088813723
Rnf169	848.245157125299	-0.370227131250448	0.114628586236455	-3.22979758719825	0.00123877886776405	0.0107840544509039
Srxn1	2466.95160652629	-0.393797630121083	0.121927983110088	-3.22975595984004	0.00123895923455842	0.0107840544509039
BC051537	1.31701770612913	-3.62624729603524	1.12296870228426	-3.22916149725189	0.00124153762341769	NA
Spred2	663.9861150211	0.455528594912859	0.141096325323032	3.22849368238294	0.00124444007575425	0.0108261798656292
Kank4	14.4009122340352	-0.953202732677013	0.295280819027818	-3.22812276061593	0.00124605487861996	0.010834646076404
Fzd1	616.513472125251	0.586794767494801	0.181797768586731	3.22773360782399	0.00124775112970763	0.0108438114134035
Peg3	9543.80372190059	0.426383813454448	0.132123775338134	3.22715432830493	0.00125028006054215	0.0108555684460937
Prr18	107.806281533301	0.526725568682375	0.16321799657502	3.22712923657456	0.00125038970908754	0.0108555684460937
Lgi3	124.058074099936	-0.632403169140064	0.195996829073806	-3.22659898187395	0.00125270895066562	0.0108701147692393
Creb3l3	16.5166809301902	0.892605622137052	0.276682873067317	3.22609640503437	0.00125491079990289	0.0108836280262764
Atp12a	31.0921955320683	-1.04646479454528	0.324497570844342	-3.22487712873285	0.0012602674540529	0.0109244744502758
Mesdc2	1892.12750383794	0.350976866901121	0.108856739483608	3.22420888744305	0.00126321219054662	0.01094438227274
Npy4r	1.18467530770414	-3.2900703666193	1.02050282581	-3.22396987387847	0.00126426699226896	NA
Gm11166	15.0946902284822	-1.21245241267344	0.376481097080717	-3.22048682410606	0.0012797307516838	0.0110818120374013
Atp8a2	1344.58529867596	0.465772299580302	0.14467739100056	3.2193855332828	0.00128465638505588	0.0111187635664037
St8sia3	5213.07612942832	0.316599777249975	0.0983498942413158	3.21911660091013	0.00128586186755905	0.0111234956432388
Gnl3l	15008.2894580453	0.306413610984346	0.095222029162131	3.21788575270358	0.00129139245000686	0.0111656184899211
Rnf138rt1	8.58829149179856	-1.26264675301662	0.392465350204968	-3.21721841777165	0.00129440016357139	0.0111858961934834
Pcdhga9	142.352649628681	-0.593835006907401	0.184616180945277	-3.21659241279301	0.00129722747687694	0.0112045949741913
Spata5l1	49.5068062465081	-0.662677601863427	0.206034510997955	-3.21634273138835	0.00129835673690327	0.0112086154700146
Evc2	75.3096815803711	0.596160022603726	0.185430266506931	3.21500925298752	0.00130440317553117	0.0112550597966374
Phactr3	2368.8781682743	0.350313679395018	0.1090176146543	3.21336767921294	0.00131188230666438	0.0113138123750432
Nrg1	134.063699059542	-0.509237580616624	0.15851668439511	-3.21251723476203	0.00131577253715749	0.0113415697102814
D430019H16Rik	10460.7754383999	0.460008865113522	0.143279928325752	3.21056040778912	0.00132476420975563	0.011413249207109
Tbx6	14.2328886418532	-0.920252078740514	0.286664386361252	-3.21020720579088	0.00132639321040545	0.0114214562727722
Nuak2	54.6961462915418	-0.689241635713955	0.214719298530468	-3.20996594358822	0.001327506996471	0.011425220765754
Sil1	462.510059898818	0.377250502575767	0.117583841758985	3.20835326463502	0.00133497411356829	0.0114836336636343
1110032A03Rik	707.882813949124	0.28773201671602	0.0897217687064266	3.20693652013806	0.00134156595974282	0.0115331839371976
Htra2	672.352192934142	-0.376137801057371	0.117293010644256	-3.20682194950371	0.00134210034564689	0.0115331839371976
Hgfac	6.53991099848427	-1.31441992891466	0.410301873009951	-3.203543574569	0.00135747495895887	0.0116537199575728
Micu1	1542.15321500808	-0.266165651798532	0.0830849384146349	-3.20353672852514	0.00135750723419079	0.0116537199575728
Jazf1	3315.55662362319	0.268293287837705	0.0837938626671597	3.20182504181006	0.0013655991207293	0.0117172290409731
Rian	43291.9369833452	0.37361610760082	0.116737676629691	3.20047578800104	0.00137200896094924	0.0117606936686503
Usp53	873.939715510542	0.311230447469482	0.0972453672042736	3.20046554830434	0.00137205771214267	0.0117606936686503
Aoc2	62.2299458476073	-0.700688103819448	0.219045265273444	-3.19882789041228	0.00137987519408769	0.0118217009271257
D10Wsu102e	1174.37605454067	0.361132872966162	0.112949962259491	3.19728192681019	0.00138729263904581	0.0118792208432695
Sapcd2	27.825144670398	-0.844470668692675	0.264154567141772	-3.19688081803804	0.00138922313453665	0.0118897221742452
Ifi27l2a	8.16289933671786	1.19184376170751	0.372944051376912	3.19577094019122	0.00139457778162219	0.0119279937137529
Hsdl1	2828.53276829466	0.301979886981824	0.0944968367853327	3.19566132851439	0.00139510763855632	0.0119279937137529
Sntg1	1264.20510179867	-0.468455334885346	0.146605301127938	-3.1953505861056	0.00139661075987352	0.0119348022728868
Trak1	3725.1665315673	0.449739445038398	0.1408096852801	3.19395249086575	0.00140339211000938	0.0119835188594428
Lrriq1	120.390069436081	0.438553359177901	0.13731041063507	3.19388280283747	0.00140373091934016	0.0119835188594428
Treml4	1.4391962261934	-2.67055568946187	0.836635411284723	-3.19201847476312	0.00141282295723018	0.0120550421706866
Arid3c	2.3168400476752	-2.0692552912081	0.648766963040011	-3.18952013449008	0.00142509211428888	0.0121514771217868
Stk4	2575.51915093773	0.27528076398598	0.0863104837736756	3.18942441230923	0.00142556414652728	0.0121514771217868
St8sia1	1004.67509997506	0.442651278001257	0.138803958574216	3.18903929360615	0.00142746472900137	0.0121582500202277
Cldn9	2.72316917499501	-2.24966281134788	0.705450863990826	-3.1889716579568	0.00142779875578062	0.0121582500202277
Ddah2	1272.77091915364	0.536501476337472	0.168263036726066	3.18846899934952	0.00143028345422839	0.0121732693589216
Olfm1	9107.32869642124	-0.457623528887582	0.143566811714572	-3.18753006647103	0.00143493538553342	0.0122067097834345
Tm6sf2	18.5868839114171	-0.878483594526842	0.275719604141109	-3.18614846870754	0.00144180585902087	0.0122589797257938
Lgals9	24.0563927169794	0.974534339153484	0.305934827039078	3.18543118671809	0.00144538473752495	0.0122832242968527
Grb2	3752.63462508457	0.224231820614937	0.0704167704613955	3.18435252207238	0.00145078215257471	0.0123228910605515
Zfp593	321.324701403163	-0.466868208177755	0.146676912154164	-3.18296998021786	0.00145772727012106	0.0123703163433048
Brf1	775.346239247653	0.225968215134034	0.0709933412071754	3.18294943288562	0.00145783071912688	0.0123703163433048
Mmp23	12.0610938769416	-1.01051125999063	0.317545097646974	-3.18226062212444	0.00146130257062066	0.0123935485723257
[truncated: 22,019 more rows]

## Sheet: KCl1h
KCL1hr__KO_minus_WT_23092015
rownames(testGenotype_TreatmentOne)	baseMean	log2FoldChange	lfcSE	stat	pvalue	padj	logpadj	transf padj
Cldn14	3.327782956	5.243383573	1.071660385	4.892766071	9.94E-07	2.29E-05	-4.640544507	4.640544507
Fcgr1	1.490916145	4.110191597	1.13347684	3.626180483	0.000287644	0.003016871	-2.520443248	2.520443248
Gcg	6.186913071	3.758694782	0.668240552	5.624763072	1.86E-08	6.60E-07	-6.180208173	6.180208173
Gm6416	2.643679045	3.744605092	0.865860354	4.324721735	1.53E-05	0.000259447	-3.585950833	3.585950833
Fcrl5	6.162536409	3.668367506	0.651026185	5.63474648	1.75E-08	6.27E-07	-6.202593535	6.202593535
Ly6g6e	17.19140909	3.509912454	0.40442401	8.678793466	4.00E-18	5.58E-16	-15.25321021	15.25321021
H2-T24	3.428470921	3.487449405	0.752219576	4.636211971	3.55E-06	7.13E-05	-4.14670515	4.14670515
Cd37	1.603970746	3.354803959	0.939365157	3.571352346	0.000355143	0.003582402	-2.445825724	2.445825724
4932412D23Rik	1.629448439	3.197834848	0.911219417	3.509401566	0.000449116	0.004346004	-2.361909863	2.361909863
Clec4n	2.670639321	3.177424198	0.744033883	4.270536961	1.95E-05	0.000318147	-3.497372497	3.497372497
Gucy2f	52.6597704	3.0467191	0.384593674	7.921916832	2.34E-15	2.50E-13	-12.60214328	12.60214328
Il10	2.623306258	2.831904781	0.686417645	4.125629346	3.70E-05	0.000544674	-3.263863357	3.263863357
Cd209f	1.672582133	2.83104728	0.89844351	3.151057632	0.001626804	0.012295229	-1.910263375	1.910263375
Bcl2a1d	4.090007116	2.815759187	0.610232688	4.614238538	3.95E-06	7.86E-05	-4.104779023	4.104779023
Ly86	50.50889632	2.811045244	0.424533306	6.621495184	3.56E-11	2.01E-09	-8.697202669	8.697202669
Erich5	14.05416899	2.760727878	0.405753596	6.80395173	1.02E-11	6.44E-10	-9.19128936	9.19128936
Gm12603	4.716160154	2.684104008	0.828081191	3.241353669	0.001189635	0.009653136	-2.015331591	2.015331591
Igsf6	14.63250839	2.678694721	0.46861642	5.716177675	1.09E-08	4.06E-07	-6.391356836	6.391356836
Masp1	969.2844876	2.624139919	0.157370179	16.67495034	1.99E-62	4.81E-59	-58.31789599	58.31789599
Cd5l	8.431402663	2.605065571	0.415052081	6.276478763	3.46E-10	1.67E-08	-7.77705533	7.77705533
Spib	9.026314408	2.585806025	0.502089304	5.150091837	2.60E-07	7.17E-06	-5.14436119	5.14436119
Slc6a12	1.939578754	2.545060114	0.875139955	2.908174973	0.003635449	0.023441078	-1.630022423	1.630022423
Cd72	21.32769221	2.54278046	0.397364886	6.399107084	1.56E-10	7.90E-09	-8.102293467	8.102293467
Abcg3	4.485675695	2.510922592	0.534510902	4.697607821	2.63E-06	5.51E-05	-4.259064116	4.259064116
Btk	3.465001703	2.509575766	0.632116822	3.970113874	7.18E-05	0.000944752	-3.024682256	3.024682256
Bcl2a1a	4.172265754	2.503960372	0.586397967	4.270070009	1.95E-05	0.000318506	-3.496882587	3.496882587
Bcl2a1b	14.32331888	2.483922974	0.44581098	5.57169537	2.52E-08	8.75E-07	-6.058132693	6.058132693
Gpr18	3.10673012	2.474946613	0.732867285	3.377073399	0.000732615	0.006597833	-2.180598695	2.180598695
Gabrq	168.6257987	2.424537206	0.191202961	12.68043756	7.59E-37	4.42E-34	-33.35458974	33.35458974
Cd180	8.216779171	2.424298527	0.538677315	4.500465231	6.78E-06	0.000127643	-3.894004608	3.894004608
Gm13749	16.90525857	2.413017676	0.366939225	6.576069034	4.83E-11	2.67E-09	-8.574204041	8.574204041
Ifi44	2.461353314	2.39347944	0.720307839	3.322856297	0.000891008	0.007699878	-2.113516159	2.113516159
Dusp27	3.638286402	2.380174942	0.539355333	4.41299974	1.02E-05	0.000182004	-3.739919515	3.739919515
Siglece	4.916627101	2.37109084	0.629322776	3.767686363	0.000164768	0.001895276	-2.722327643	2.722327643
Chrna5	215.5135656	2.356144223	0.209472941	11.2479646	2.37E-29	8.51E-27	-26.06982634	26.06982634
Slc17a6	7221.415834	2.342744513	0.109845693	21.32759547	6.30E-101	3.54E-97	-96.4505141	96.4505141
Cd79b	4.190282143	2.33759473	0.587308194	3.980184092	6.89E-05	0.00090915	-3.04136463	3.04136463
Mill2	3.137185426	2.335102486	0.566586508	4.121352088	3.77E-05	0.000549388	-3.260121088	3.260121088
Cd69	15.56592285	2.332184547	0.57348203	4.066709025	4.77E-05	0.000669845	-3.174025791	3.174025791
Cx3cr1	19.70780685	2.326737468	0.3985763	5.837621218	5.30E-09	2.09E-07	-6.679023901	6.679023901
Abi3	2.551955444	2.323022016	0.671915506	3.457312704	0.000545591	0.005138235	-2.289186027	2.289186027
Tmc3	10.47845284	2.318892876	0.354894027	6.534043125	6.40E-11	3.46E-09	-8.460329109	8.460329109
1600029O15Rik	129.1828849	2.312751809	0.22336536	10.35412029	4.01E-25	9.95E-23	-22.00199536	22.00199536
Themis	36.05958011	2.310825151	0.293428923	7.875246688	3.40E-15	3.57E-13	-12.44772923	12.44772923
Batf	4.845180054	2.299877636	0.529932069	4.33994802	1.43E-05	0.00024333	-3.613804592	3.613804592
Morc1	11.48643147	2.298063165	0.373381402	6.154733874	7.52E-10	3.42E-08	-7.465608088	7.465608088
Klhl14	113.7932135	2.295793954	0.250187633	9.176288706	4.46E-20	7.77E-18	-17.10971061	17.10971061
Fli1	10.27799825	2.288628271	0.438587702	5.218177032	1.81E-07	5.07E-06	-5.295129056	5.295129056
Ctss	72.44656435	2.26777924	0.408259651	5.554747417	2.78E-08	9.50E-07	-6.022134322	6.022134322
Ms4a7	43.61652977	2.244403607	0.496956475	4.516298143	6.29E-06	0.000119373	-3.923094469	3.923094469
C1qb	62.33030322	2.240486196	0.412307896	5.434012342	5.51E-08	1.79E-06	-5.747318912	5.747318912
Was	4.180047531	2.233098414	0.687953906	3.24600005	0.001170388	0.009535833	-2.020641361	2.020641361
Clec4a3	15.23062252	2.22504334	0.446565861	4.982564798	6.27E-07	1.53E-05	-4.814986564	4.814986564
C1qc	76.22089161	2.221516853	0.419814283	5.291665726	1.21E-07	3.58E-06	-5.446340525	5.446340525
Ifltd1	1.844407151	2.20470842	0.711406234	3.099085042	0.001941193	0.014159388	-1.848955513	1.848955513
Krt78	3.409313717	2.197529042	0.543330715	4.044551472	5.24E-05	0.000724404	-3.140019316	3.140019316
Slc45a2	1.423567401	2.197176741	0.838880936	2.619175911	0.008814248	0.045923294	-1.337966972	1.337966972
Arhgap25	10.3556111	2.19618767	0.374738592	5.860585797	4.61E-09	1.84E-07	-6.73591479	6.73591479
Laptm5	64.08123227	2.190350304	0.29239506	7.491064675	6.83E-14	6.20E-12	-11.20745648	11.20745648
Sla	1975.182984	2.189792116	0.251600202	8.703459296	3.22E-18	4.61E-16	-15.33661012	15.33661012
Tlr1	20.49287233	2.186816704	0.429113875	5.096122103	3.47E-07	9.23E-06	-5.03463172	5.03463172
Clec12a	25.6622653	2.166151653	0.387878565	5.584612938	2.34E-08	8.17E-07	-6.087692246	6.087692246
Fcer1g	38.1797322	2.150036752	0.411074188	5.230288874	1.69E-07	4.79E-06	-5.319930764	5.319930764
Gpr50	16.66960468	2.146768183	0.319656446	6.715860766	1.87E-11	1.13E-09	-8.947268406	8.947268406
Xirp2	1.910920136	2.140877349	0.73524335	2.911794238	0.003593593	0.023214004	-1.634249944	1.634249944
C1qa	56.38432001	2.133354332	0.416078527	5.12728774	2.94E-07	7.98E-06	-5.097995913	5.097995913
Ms4a6c	47.68015762	2.130440155	0.428476304	4.972130632	6.62E-07	1.61E-05	-4.793461906	4.793461906
Myo1h	23.68941292	2.128664295	0.29161804	7.299494544	2.89E-13	2.39E-11	-10.62142984	10.62142984
Rac2	81.5644295	2.100195308	0.359896907	5.835546977	5.36E-09	2.11E-07	-6.675649156	6.675649156
P2ry6	5.831914592	2.098143293	0.56315574	3.725689259	0.000194782	0.002182543	-2.661037109	2.661037109
Pik3ap1	26.38651886	2.097336995	0.464051573	4.519620482	6.20E-06	0.000117671	-3.929329567	3.929329567
Kynu	3.183320269	2.077916269	0.606333626	3.427018031	0.000610249	0.005648681	-2.24805296	2.24805296
Sostdc1	113.4293255	2.073799208	0.209581797	9.894939544	4.38E-23	9.24E-21	-20.03421315	20.03421315
C1qtnf7	9.14393894	2.073785496	0.394709729	5.253950806	1.49E-07	4.29E-06	-5.367561719	5.367561719
Gbp8	3.369022041	2.072696777	0.564434036	3.672168305	0.000240501	0.002590229	-2.586661762	2.586661762
Ccm2l	3.117774624	2.07173425	0.533793938	3.881149825	0.000103964	0.001290832	-2.889130122	2.889130122
Sash3	9.030793722	2.068878042	0.417227378	4.95863443	7.10E-07	1.70E-05	-4.76946266	4.76946266
Tcp11	70.40343726	2.055059708	0.245838162	8.359400731	6.30E-17	7.94E-15	-14.09997805	14.09997805
Hck	44.54081922	2.047155115	0.319397253	6.409432438	1.46E-10	7.43E-09	-8.129072994	8.129072994
Acp5	8.5576227	2.047028462	0.417259529	4.905887869	9.30E-07	2.16E-05	-4.665498293	4.665498293
Lmcd1	65.38280328	2.046445024	0.231467866	8.841162548	9.47E-19	1.42E-16	-15.84907455	15.84907455
Bin2	5.166707281	2.040285499	0.554192879	3.681544056	0.000231826	0.002517434	-2.599041993	2.599041993
Ly9	22.57154576	2.038719526	0.375924979	5.423208453	5.85E-08	1.89E-06	-5.723532135	5.723532135
Cd244	6.691222218	2.034732767	0.506245443	4.019261397	5.84E-05	0.000792459	-3.101023023	3.101023023
Arl11	2.189100658	2.031388404	0.707524641	2.871120364	0.004090198	0.025693832	-1.590171115	1.590171115
Fcrls	105.7931361	2.030559051	0.423279414	4.797207194	1.61E-06	3.55E-05	-4.449597089	4.449597089
Fyb	42.87220053	2.023886877	0.52693534	3.840863809	0.000122602	0.001486188	-2.827926339	2.827926339
Ugt1a7c	1.630427735	2.023729743	0.745616742	2.714168861	0.006644229	0.037064569	-1.43104105	1.43104105
BC035044	8.552263181	2.013404382	0.515872824	3.90290841	9.50E-05	0.001195907	-2.922302508	2.922302508
4921515E04Rik	2.42273527	2.011879787	0.690260202	2.914668674	0.003560663	0.023080753	-1.636750025	1.636750025
Stap1	3.47138836	2.005358682	0.552245927	3.631278357	0.000282021	0.002965257	-2.527937611	2.527937611
Hcls1	29.54145636	2.003581112	0.3787173	5.290439897	1.22E-07	3.59E-06	-5.444874423	5.444874423
Ms4a6d	38.49189757	1.99891823	0.42030281	4.755900229	1.98E-06	4.26E-05	-4.371081401	4.371081401
Serping1	11.65997404	1.997509732	0.343619296	5.813147743	6.13E-09	2.39E-07	-6.62243938	6.62243938
Gm9994	1.847157888	1.996738442	0.731573472	2.729375134	0.006345447	0.035871853	-1.445246185	1.445246185
Ly75	1.957282461	1.995827317	0.751112766	2.657160692	0.007880187	0.042283076	-1.373833425	1.373833425
Slfn2	13.77805253	1.992495263	0.42659978	4.670642968	3.00E-06	6.19E-05	-4.208261921	4.208261921
Cd52	66.90139131	1.98966006	0.312071206	6.375660493	1.82E-10	9.13E-09	-8.039611723	8.039611723
Trdn	13.73267764	1.963503864	0.324923551	6.042971821	1.51E-09	6.52E-08	-7.185917233	7.185917233
Emr1	268.2899318	1.961243642	0.392932006	4.991305392	6.00E-07	1.47E-05	-4.832739649	4.832739649
Cd48	17.74509997	1.957722311	0.568598076	3.443068827	0.000575153	0.005377648	-2.269407633	2.269407633
Layn	238.7156232	1.951248088	0.231336455	8.434676202	3.32E-17	4.38E-15	-14.3583868	14.3583868
Vav1	26.29781256	1.949945912	0.394513474	4.942659858	7.71E-07	1.83E-05	-4.737492005	4.737492005
Aoah	13.45062118	1.94399025	0.605134489	3.2124929	0.001315884	0.01045156	-1.980818865	1.980818865
Mpeg1	63.35640354	1.939680493	0.437174989	4.436851472	9.13E-06	0.000166461	-3.778688432	3.778688432
AF251705	17.58504898	1.930658047	0.344896032	5.597797206	2.17E-08	7.59E-07	-6.119775566	6.119775566
C3ar1	42.94895152	1.928399894	0.413290116	4.66597148	3.07E-06	6.31E-05	-4.199977113	4.199977113
Clec4a2	28.4377783	1.923440098	0.467644091	4.113042664	3.90E-05	0.000564522	-3.248319279	3.248319279
H2-Q10	2.205493313	1.890742623	0.668420833	2.828670994	0.004674172	0.028491287	-1.545287938	1.545287938
Slc22a18	5.751060138	1.88676981	0.468100844	4.030690891	5.56E-05	0.000762116	-3.117978797	3.117978797
AI607873	3.776959107	1.885201494	0.535289584	3.521834818	0.000428571	0.00419771	-2.376987602	2.376987602
Ikzf1	15.32597543	1.88298919	0.578108856	3.257153338	0.001125356	0.009261357	-2.033325361	2.033325361
Clec4a1	10.49199257	1.876473917	0.452372626	4.148071323	3.35E-05	0.000501921	-3.299364365	3.299364365
Cd86	8.976593751	1.876044521	0.398750186	4.704811653	2.54E-06	5.34E-05	-4.272183361	4.272183361
Ccdc42	21.35285769	1.864148371	0.29034279	6.420508572	1.36E-10	6.95E-09	-8.158023998	8.158023998
Dpp4	13.09288458	1.860387732	0.307738604	6.045350521	1.49E-09	6.46E-08	-7.190102365	7.190102365
B930025P03Rik	48.4773216	1.857972756	0.269771369	6.887212548	5.69E-12	3.78E-10	-9.422223799	9.422223799
Pcdhb1	52.90942395	1.848296059	0.232839317	7.938075434	2.05E-15	2.22E-13	-12.65267709	12.65267709
Gpr31b	6.150760599	1.845925121	0.502461927	3.673761178	0.000239006	0.002582123	-2.588023143	2.588023143
Cryba4	3.959715429	1.845183645	0.530355232	3.47914668	0.000503013	0.004775042	-2.321022849	2.321022849
F2rl2	15.79414499	1.844460813	0.350491708	5.262494857	1.42E-07	4.12E-06	-5.384760434	5.384760434
Hmha1	5.268242357	1.841864628	0.466425255	3.948895582	7.85E-05	0.001017501	-2.992464946	2.992464946
Pycard	15.33615485	1.836892099	0.416987345	4.405150708	1.06E-05	0.000187897	-3.726079274	3.726079274
Tnfaip8l2	5.709282177	1.836827864	0.509489166	3.605234392	0.000311871	0.003217018	-2.492546459	2.492546459
Tlr9	3.642869609	1.832466351	0.551032604	3.325513478	0.000882558	0.007646424	-2.116541635	2.116541635
Gm13031	13.77181149	1.825947862	0.362358256	5.039067918	4.68E-07	1.19E-05	-4.925230494	4.925230494
Ms4a6b	9.225797565	1.825941225	0.487702828	3.743962755	0.000181141	0.002054223	-2.687352312	2.687352312
Fpr1	10.19137451	1.815896417	0.550828499	3.296663879	0.000978405	0.008318907	-2.079933725	2.079933725
Grap	9.029461223	1.809410365	0.392397202	4.611170402	4.00E-06	7.96E-05	-4.098878013	4.098878013
Cnr2	2.637081894	1.808169667	0.588555411	3.072216536	0.002124755	0.015254515	-1.816601608	1.816601608
Lrmp	17.35908982	1.805724708	0.434485522	4.156006624	3.24E-05	0.000488711	-3.310948084	3.310948084
Marco	67.43884589	1.801331783	0.378864899	4.754549154	1.99E-06	4.28E-05	-4.36873047	4.36873047
Gpr151	30.11123254	1.794074358	0.293987839	6.102546169	1.04E-09	4.68E-08	-7.330147591	7.330147591
2610203C22Rik	5.431796888	1.788583453	0.414288942	4.317236772	1.58E-05	0.000266257	-3.574698551	3.574698551
Adap2	9.676050883	1.786304414	0.359016343	4.975551805	6.51E-07	1.59E-05	-4.799878835	4.799878835
Smr3a	7.773660609	1.78570981	0.379620113	4.703938876	2.55E-06	5.36E-05	-4.270866164	4.270866164
Ccl9	11.6857951	1.774680992	0.402912449	4.404631814	1.06E-05	0.00018815	-3.725496642	3.725496642
Pirb	18.14091175	1.769436242	0.547825081	3.229929229	0.001238209	0.009976671	-2.001014334	2.001014334
Gm19782	2.905499368	1.76702268	0.601464386	2.937867513	0.003304782	0.021713833	-1.663263499	1.663263499
Grp	415.3191348	1.7621431	0.311423994	5.658340835	1.53E-08	5.51E-07	-6.258472463	6.258472463
Rgs13	371.2899335	1.75912895	0.354859657	4.957252579	7.15E-07	1.71E-05	-4.767604786	4.767604786
Asb2	25.7864145	1.756618626	0.342872328	5.123244083	3.00E-07	8.13E-06	-5.090068965	5.090068965
4933413G19Rik	4.573122463	1.754979143	0.473193405	3.708798822	0.000208245	0.002304339	-2.637453587	2.637453587
9130019P16Rik	24.64926785	1.753903172	0.263332613	6.660410009	2.73E-11	1.58E-09	-8.801590463	8.801590463
Psmb9	63.42774743	1.749789757	0.235776846	7.421380781	1.16E-13	1.03E-11	-10.98712256	10.98712256
Cpxm2	45.87397166	1.745531472	0.221047698	7.896628126	2.87E-15	3.04E-13	-12.51667042	12.51667042
Ghsr	108.1877844	1.74501871	0.225652648	7.733207338	1.05E-14	1.06E-12	-11.97453723	11.97453723
Lrrc25	8.240607646	1.741264066	0.449103808	3.877197289	0.000105667	0.00130717	-2.883667836	2.883667836
Uchl1os	5.315090703	1.738371004	0.403986255	4.303044929	1.68E-05	0.000281378	-3.550710379	3.550710379
1700101E01Rik	21.14454931	1.735260372	0.280408088	6.188339238	6.08E-10	2.81E-08	-7.550852704	7.550852704
Cybb	32.60847388	1.735080073	0.425137438	4.08122155	4.48E-05	0.000637876	-3.195263481	3.195263481
Ctsh	34.02767852	1.725114849	0.342422056	5.037978194	4.70E-07	1.19E-05	-4.923410869	4.923410869
Ptprc	72.86508414	1.714971882	0.394971401	4.342015337	1.41E-05	0.00024143	-3.617209528	3.617209528
Nfam1	8.063421891	1.710106291	0.451211827	3.790029845	0.000150629	0.001770086	-2.752005672	2.752005672
Mx1	12.51607294	1.709237361	0.322633699	5.297764511	1.17E-07	3.48E-06	-5.458550362	5.458550362
Arhgap30	14.9389039	1.701307957	0.446731867	3.808342501	0.000139901	0.001664817	-2.778633519	2.778633519
Klhl35	5.410667809	1.700051029	0.470965402	3.609715321	0.000306533	0.003176064	-2.498110754	2.498110754
Ccl6	3.86128477	1.693138943	0.533656467	3.172713247	0.001510216	0.011624655	-1.934619917	1.934619917
Il21r	2.844052211	1.688417633	0.606280573	2.784878336	0.005354781	0.031494543	-1.501764687	1.501764687
1700063D05Rik	3.810259039	1.687354658	0.51713762	3.262873541	0.001102887	0.009115689	-2.040210481	2.040210481
Vnn3	3.438900512	1.683667071	0.549814015	3.062248368	0.002196811	0.015678508	-1.804695277	1.804695277
Rtdr1	7.276068822	1.677103456	0.356359023	4.706218576	2.52E-06	5.31E-05	-4.274637484	4.274637484
Tyrobp	38.00116496	1.668995708	0.343292439	4.861731621	1.16E-06	2.63E-05	-4.579395945	4.579395945
Fcgr4	4.781857915	1.666379045	0.451352459	3.691968462	0.000222525	0.002436808	-2.613178654	2.613178654
Iqcf5	39.17822328	1.65830641	0.234994168	7.056798144	1.70E-12	1.26E-10	-9.900882828	9.900882828
1700028E10Rik	10.98730135	1.654725992	0.32659403	5.066614327	4.05E-07	1.05E-05	-4.977981333	4.977981333
Hk3	9.304382067	1.65059163	0.400174559	4.124679077	3.71E-05	0.000545602	-3.26312439	3.26312439
Gm9696	2.728223785	1.648192216	0.584474921	2.819953699	0.004803058	0.028996938	-1.537647857	1.537647857
Cyth4	49.49200684	1.647283059	0.406235379	4.05499655	5.01E-05	0.000699653	-3.155117196	3.155117196
AB124611	11.99720154	1.645048829	0.37243812	4.416972213	1.00E-05	0.000179806	-3.745196965	3.745196965
Unc93b1	35.62887003	1.64105808	0.329869213	4.974874941	6.53E-07	1.59E-05	-4.798987503	4.798987503
Csf3r	5.925873763	1.633565875	0.460969198	3.543763625	0.000394459	0.003902068	-2.408705166	2.408705166
Nfib	11456.83747	1.624700158	0.192697307	8.431358936	3.42E-17	4.47E-15	-14.34945101	14.34945101
Zbbx	105.3342762	1.623978786	0.224624606	7.229745721	4.84E-13	3.86E-11	-10.41354318	10.41354318
Dock2	29.22157206	1.620878079	0.354603823	4.570954887	4.86E-06	9.46E-05	-4.024296992	4.024296992
Tlr7	27.46626984	1.620193756	0.329420868	4.918309406	8.73E-07	2.04E-05	-4.690021761	4.690021761
C730002L08Rik	54.9388883	1.616397051	0.263220528	6.140847229	8.21E-10	3.71E-08	-7.430106358	7.430106358
Spi1	13.51437372	1.608061642	0.423850675	3.793934365	0.000148279	0.001749772	-2.757018557	2.757018557
Scube3	45.52628514	1.603948685	0.24572448	6.527427334	6.69E-11	3.61E-09	-8.442533339	8.442533339
Cd33	3.229908174	1.598129277	0.608142933	2.62788432	0.008591773	0.045070107	-1.346111409	1.346111409
Abcc3	2.555720001	1.594791618	0.562705338	2.834150506	0.004594769	0.028134242	-1.550764786	1.550764786
Oasl2	16.15469703	1.591419339	0.317695499	5.009259942	5.46E-07	1.36E-05	-4.86619434	4.86619434
Apbb1ip	3.396778045	1.590433865	0.528310472	3.010415181	0.002608908	0.017886326	-1.747478858	1.747478858
Gm13446	11.78334896	1.590293618	0.31287924	5.082771295	3.72E-07	9.77E-06	-5.01017922	5.01017922
Lcp1	115.7409493	1.590070102	0.361515522	4.398345307	1.09E-05	0.000192467	-3.715642681	3.715642681
Plcz1	10.69990293	1.587988568	0.338459236	4.69181632	2.71E-06	5.65E-05	-4.248325302	4.248325302
Diap3	171.1775987	1.577934893	0.216394091	7.291950015	3.06E-13	2.52E-11	-10.59921513	10.59921513
Cmtm7	2.817347258	1.573890447	0.573434326	2.744674282	0.006057098	0.034560514	-1.461419801	1.461419801
Fcgbp	24.19211958	1.572545577	0.271267515	5.79702873	6.75E-09	2.60E-07	-6.584642708	6.584642708
Cd53	32.51762657	1.569617626	0.324776231	4.832920255	1.35E-06	3.03E-05	-4.519246584	4.519246584
Ncf4	8.534076032	1.56368895	0.42718488	3.660450132	0.000251773	0.002687378	-2.57067131	2.57067131
Lyz2	113.0766137	1.558370933	0.387455649	4.022062749	5.77E-05	0.000784352	-3.105489131	3.105489131
Itgam	16.61208432	1.5577153	0.369050486	4.220873187	2.43E-05	0.000385854	-3.413577522	3.413577522
Slc11a1	17.06252969	1.5548787	0.375269955	4.143360483	3.42E-05	0.000510087	-3.292355458	3.292355458
Dmgdh	3.823514064	1.554187946	0.468001572	3.320903258	0.000897266	0.00773417	-2.11158628	2.11158628
Pctp	5.277708152	1.544118145	0.467892607	3.300155037	0.000966314	0.008236842	-2.084239286	2.084239286
Tex36	45.6447136	1.526787837	0.226820899	6.731248491	1.68E-11	1.02E-09	-8.990657419	8.990657419
Aipl1	9.257719152	1.52630301	0.342891932	4.451265454	8.54E-06	0.000156513	-3.805449248	3.805449248
Igfbpl1	74.20126557	1.523025956	0.219436997	6.940606996	3.90E-12	2.67E-10	-9.573639507	9.573639507
Irak3	7.676729542	1.520789707	0.401107119	3.791480222	0.000149752	0.001764629	-2.753346554	2.753346554
A630001G21Rik	7.302757403	1.514701689	0.408346856	3.709350683	0.000207791	0.002300831	-2.638115368	2.638115368
Pik3cg	48.25582956	1.512387578	0.408421537	3.703006428	0.000213059	0.002351453	-2.62866378	2.62866378
Gna15	5.171658146	1.510242909	0.450019263	3.355951692	0.000790924	0.007032933	-2.15286352	2.15286352
Insm1	82.82888554	1.509368616	0.20642659	7.311890457	2.63E-13	2.19E-11	-10.65933729	10.65933729
Glipr1	22.32806661	1.502885982	0.337101102	4.458264819	8.26E-06	0.00015215	-3.817726954	3.817726954
Pcdhgc4	1883.000556	1.500012681	0.18895508	7.93846179	2.05E-15	2.22E-13	-12.65267709	12.65267709
Rassf4	58.43714439	1.498967575	0.361346496	4.148283138	3.35E-05	0.000501902	-3.299380908	3.299380908
Mag	2.336977125	1.496786558	0.571049985	2.62111303	0.00876432	0.045776154	-1.339360701	1.339360701
Slc12a1	3.317752785	1.490505821	0.573117436	2.600698789	0.00930341	0.04791015	-1.31957247	1.31957247
1700001L05Rik	192.3485147	1.48939659	0.237862382	6.261589472	3.81E-10	1.82E-08	-7.74046822	7.74046822
Cd14	14.51919857	1.488066541	0.334569815	4.447701119	8.68E-06	0.000158787	-3.799184305	3.799184305
Ncf1	30.90131944	1.479052637	0.366331182	4.037474044	5.40E-05	0.000744676	-3.128032717	3.128032717
Tlr8	3.225095331	1.475123809	0.534834128	2.758095888	0.005813914	0.0335064	-1.474872225	1.474872225
Fezf2	462.8395584	1.474189302	0.183523709	8.032691309	9.54E-16	1.08E-13	-12.96630518	12.96630518
Lilrb4	8.479592642	1.472684967	0.48263221	3.051360716	0.002278067	0.016146176	-1.791930325	1.791930325
Ptpn6	37.36106325	1.470836085	0.325860125	4.513703796	6.37E-06	0.000120462	-3.919149961	3.919149961
Cxcl16	8.508976628	1.46999259	0.406767655	3.613838442	0.000301697	0.003139187	-2.503182757	2.503182757
1300002K09Rik	3.683736457	1.4665328	0.499878387	2.933779174	0.003348624	0.021935291	-1.658856604	1.658856604
Trpm3	432.8306229	1.460531391	0.198203535	7.368846344	1.72E-13	1.48E-11	-10.83113109	10.83113109
Itih3	13.74200232	1.459900401	0.310790574	4.697376695	2.64E-06	5.51E-05	-4.259064116	4.259064116
2610100L16Rik	325.5209982	1.453141492	0.152071419	9.555651535	1.23E-21	2.36E-19	-18.62772667	18.62772667
Slc15a3	13.11343451	1.43418005	0.354782366	4.042422026	5.29E-05	0.000730418	-3.136428343	3.136428343
2900008C10Rik	69.44143263	1.434121157	0.206180239	6.955667342	3.51E-12	2.42E-10	-9.616459671	9.616459671
Naa11	4.79404335	1.433456442	0.523385987	2.738813186	0.00616614	0.035116843	-1.454484533	1.454484533
Itgal	21.95603954	1.432254436	0.392135664	3.652446256	0.000259754	0.002762094	-2.558761515	2.558761515
Odf3l2	18.52761527	1.42978572	0.279055042	5.123669179	3.00E-07	8.12E-06	-5.090351999	5.090351999
Irf5	13.60129578	1.428697007	0.338993688	4.214523923	2.50E-05	0.000396126	-3.402167032	3.402167032
Pik3r6	16.14369893	1.42675969	0.301176876	4.737281652	2.17E-06	4.62E-05	-4.334983163	4.334983163
Abcb11	4.926758608	1.425970724	0.415659595	3.430621455	0.0006022	0.005588433	-2.252709924	2.252709924
Islr2	3782.388274	1.414785746	0.178248441	7.937156374	2.07E-15	2.22E-13	-12.65267709	12.65267709
Osr1	4.33423199	1.414073486	0.48628882	2.907888129	0.003638785	0.023441078	-1.630022423	1.630022423
Cd84	23.00386727	1.412158193	0.295054327	4.786095525	1.70E-06	3.72E-05	-4.429267675	4.429267675
Erp27	5.987980842	1.409086471	0.448275084	3.143352198	0.001670247	0.012535021	-1.901874925	1.901874925
Entpd1	59.93376056	1.408208424	0.21679607	6.49554406	8.27E-11	4.39E-09	-8.357217001	8.357217001
Thsd7a	4144.414359	1.407628641	0.294835804	4.774279855	1.80E-06	3.91E-05	-4.407333188	4.407333188
Nodal	3.788502582	1.406709908	0.495001384	2.841830251	0.004485537	0.027592996	-1.559201144	1.559201144
Gucy1b2	26.92876226	1.404690044	0.27757538	5.060571446	4.18E-07	1.08E-05	-4.964876064	4.964876064
5430416O09Rik	11.16281316	1.398520967	0.334621434	4.179412393	2.92E-05	0.000449468	-3.347301303	3.347301303
C2cd4a	10.3870038	1.392880682	0.334710522	4.161448745	3.16E-05	0.00047966	-3.319066066	3.319066066
Ucp2	22.56010743	1.389466467	0.295528772	4.701628403	2.58E-06	5.41E-05	-4.267028865	4.267028865
Micall2	34.83147667	1.38508517	0.240851861	5.750776277	8.88E-09	3.36E-07	-6.474198561	6.474198561
Hspb3	95.0200366	1.378818793	0.267807256	5.148549054	2.63E-07	7.21E-06	-5.142203904	5.142203904
Aif1	45.38359772	1.372456106	0.27709257	4.953059923	7.31E-07	1.74E-05	-4.758853762	4.758853762
Itgad	6.352812096	1.371663887	0.391744709	3.501422882	0.000462781	0.004462889	-2.35038395	2.35038395
Myo1f	23.54682839	1.370705431	0.366241505	3.742627239	0.000182106	0.002062405	-2.685625959	2.685625959
Slfn8	4.17937181	1.362763874	0.5252351	2.594578837	0.009470689	0.048520041	-1.314078839	1.314078839
Tfap2d	26.59436586	1.361605275	0.292777122	4.650654617	3.31E-06	6.73E-05	-4.171876766	4.171876766
Rtp4	8.286759736	1.342676563	0.354976728	3.782435453	0.000155301	0.001813568	-2.741466216	2.741466216
Ccdc147	68.63297092	1.342600801	0.216251027	6.208529129	5.35E-10	2.49E-08	-7.604165619	7.604165619
Csrp2	1002.929745	1.336862272	0.131378554	10.1756507	2.55E-24	5.89E-22	-21.22978084	21.22978084
Gm11541	14.19464339	1.33414143	0.331008166	4.030539327	5.56E-05	0.000762116	-3.117978797	3.117978797
Lama2	441.1675044	1.318759258	0.161259425	8.177874003	2.89E-16	3.51E-14	-13.45474707	13.45474707
Col13a1	9.371416981	1.313498133	0.333340835	3.940405724	8.13E-05	0.00104933	-2.979087793	2.979087793
Selplg	5.226349168	1.31331834	0.493546006	2.660984636	0.007791251	0.041939136	-1.377380526	1.377380526
Cabp4	4.028111198	1.312810562	0.493785622	2.658665022	0.007845092	0.042148337	-1.375219553	1.375219553
Ccl3	11.92329625	1.312453228	0.350431815	3.745245648	0.000180217	0.002045128	-2.689279544	2.689279544
Col6a3	92.54160427	1.311413259	0.221513269	5.920246969	3.21E-09	1.32E-07	-6.880245489	6.880245489
A330074K22Rik	19.03750516	1.31113734	0.282078314	4.648132361	3.35E-06	6.81E-05	-4.167089118	4.167089118
Tap1	351.3764329	1.309335112	0.196257123	6.671529115	2.53E-11	1.47E-09	-8.831490332	8.831490332
Ntsr2	33.02243646	1.306637388	0.316818465	4.124246315	3.72E-05	0.000545678	-3.263063172	3.263063172
Lef1	7.737413835	1.302833942	0.370069903	3.520507696	0.000430721	0.004213884	-2.375317463	2.375317463
Scml4	214.4997154	1.297856598	0.209354824	6.199315479	5.67E-10	2.63E-08	-7.579920626	7.579920626
Dkkl1	7.603614057	1.295608498	0.35160562	3.684834443	0.000228851	0.002493114	-2.603257863	2.603257863
Scnn1a	13.65087315	1.292725652	0.313014127	4.129927511	3.63E-05	0.000536094	-3.270759247	3.270759247
Spns3	3.980945463	1.290150414	0.477611615	2.701254268	0.006907851	0.038099114	-1.41908512	1.41908512
Gm13152	50.93883999	1.289537252	0.259582505	4.967735606	6.77E-07	1.64E-05	-4.786110117	4.786110117
Klhl6	9.266376317	1.28732638	0.442041863	2.912227297	0.003588614	0.023201007	-1.634493156	1.634493156
Carhsp1	3524.482099	1.282954476	0.103808076	12.35890817	4.36E-35	2.45E-32	-31.61006929	31.61006929
Dbh	6.469045741	1.279546928	0.360968829	3.5447574	0.000392975	0.003891947	-2.40983312	2.40983312
1700001G17Rik	11.45493976	1.278889417	0.337973686	3.783991091	0.000154333	0.00180476	-2.743580624	2.743580624
Cd300a	6.304453692	1.278403714	0.433406239	2.949666151	0.003181175	0.021016164	-1.677446542	1.677446542
Slc7a7	27.19402186	1.277459773	0.304599889	4.193894418	2.74E-05	0.00042675	-3.369826556	3.369826556
Hrh3	190.4458837	1.275491989	0.224814004	5.67354331	1.40E-08	5.08E-07	-6.294190053	6.294190053
Gm1653	7.978125641	1.27237104	0.352024897	3.614434806	0.000301004	0.003137497	-2.50341662	2.50341662
Ifi27l2a	8.162899337	1.271207355	0.374978526	3.390080408	0.000698721	0.006339792	-2.197924959	2.197924959
Htr1d	5.333248059	1.271039771	0.423432271	3.001754609	0.002684285	0.01828432	-1.737921181	1.737921181
Syk	58.62683997	1.264480428	0.300582873	4.206761402	2.59E-05	0.000406923	-3.39048736	3.39048736
Wdr38	5.169279662	1.260945371	0.446055433	2.82688042	0.004700388	0.028612381	-1.543445994	1.543445994
Mdfi	12.05868475	1.258333668	0.309397849	4.06704077	4.76E-05	0.000669449	-3.174282326	3.174282326
Aldh1b1	400.4846378	1.24873027	0.138980037	8.984961448	2.59E-19	4.12E-17	-16.38477282	16.38477282
Col28a1	83.00802234	1.247539175	0.292548757	4.264380372	2.00E-05	0.000324849	-3.488318175	3.488318175
Ticam2	5.103456399	1.244005111	0.438938482	2.834121778	0.004595182	0.028134242	-1.550764786	1.550764786
Lrrc9	26.91776839	1.242157555	0.27294314	4.550975538	5.34E-06	0.000103403	-3.985466689	3.985466689
Ano5	98.63286692	1.237765076	0.199038093	6.21873459	5.01E-10	2.35E-08	-7.628781796	7.628781796
Itgbl1	358.8692815	1.235832745	0.219620546	5.627127191	1.83E-08	6.53E-07	-6.185241655	6.185241655
Shroom1	11.28799237	1.235799327	0.337297865	3.663821965	0.00024848	0.002657267	-2.575564729	2.575564729
Fam181b	150.4201077	1.234479281	0.199787742	6.178954057	6.45E-10	2.97E-08	-7.527393305	7.527393305
Mapk15	120.0380475	1.233882841	0.180350354	6.841588132	7.83E-12	5.09E-10	-9.293573903	9.293573903
Fxyd7	582.0834339	1.230353677	0.19477125	6.316916255	2.67E-10	1.31E-08	-7.88405101	7.88405101
Gm15612	6.18829149	1.224135887	0.390229225	3.136966193	0.001707058	0.012748953	-1.894525476	1.894525476
Cacng5	414.5755658	1.221898962	0.152814938	7.995939267	1.29E-15	1.43E-13	-12.84511042	12.84511042
Tnfrsf1b	27.45072289	1.221260543	0.282776772	4.318814915	1.57E-05	0.00026542	-3.576065893	3.576065893
Nxn	527.6374441	1.218840438	0.124506761	9.789351422	1.25E-22	2.55E-20	-19.59430885	19.59430885
1700023F02Rik	4.343321698	1.218250794	0.43699811	2.787771308	0.005307199	0.031258238	-1.505035501	1.505035501
Rab20	7.469379732	1.213222294	0.363329277	3.339181207	0.000840257	0.007366867	-2.132717186	2.132717186
3110007F17Rik	55.52293146	1.211250413	0.258739482	4.681351303	2.85E-06	5.91E-05	-4.228267881	4.228267881
Lingo4	16.58894302	1.210674987	0.290855447	4.162462833	3.15E-05	0.000478513	-3.320106476	3.320106476
Pitpnm3	410.9690479	1.206672425	0.166698602	7.238647522	4.53E-13	3.64E-11	-10.43842072	10.43842072
Tnfaip2	11.50313546	1.206550102	0.394484027	3.058552484	0.002224091	0.015813228	-1.800979454	1.800979454
Iqca	5.786091882	1.206079338	0.397284431	3.035808216	0.002398919	0.016787019	-1.775026428	1.775026428
4931440P22Rik	37.0831779	1.203177519	0.288576311	4.169356505	3.05E-05	0.000465525	-3.332057401	3.332057401
Cenpf	267.2404234	1.202797355	0.212196998	5.668305249	1.44E-08	5.21E-07	-6.282774035	6.282774035
Grin2d	115.1996505	1.196792933	0.204568301	5.850334223	4.91E-09	1.95E-07	-6.710146809	6.710146809
Slc14a1	8.227991739	1.190633683	0.396704003	3.001315021	0.002688163	0.018301731	-1.737507831	1.737507831
Stk32b	435.9503576	1.18993239	0.158962182	7.48563196	7.12E-14	6.43E-12	-11.19181242	11.19181242
Milr1	6.149343487	1.189828319	0.452553915	2.629141586	0.008560071	0.04500167	-1.34677137	1.34677137
Gmfg	12.29553107	1.188165891	0.306679864	3.874287261	0.000106937	0.001317098	-2.880381809	2.880381809
Emx1	271.0794277	1.187017154	0.199911739	5.937706104	2.89E-09	1.20E-07	-6.921113324	6.921113324
9130008F23Rik	4.626954719	1.186151841	0.426962279	2.778118579	0.005467466	0.031968017	-1.4952843	1.4952843
H2-Ab1	5.791786709	1.181681722	0.376611011	3.137671724	0.001702955	0.012723936	-1.895378517	1.895378517
Neurod1	635.463245	1.180730606	0.140882942	8.380933748	5.25E-17	6.67E-15	-14.17608737	14.17608737
Olfm4	84.11644018	1.178340661	0.264436841	4.456038175	8.35E-06	0.000153571	-3.813690947	3.813690947
Dnah7b	86.87246966	1.175843529	0.211642694	5.555795513	2.76E-08	9.47E-07	-6.023607212	6.023607212
Plvap	102.2845534	1.172395724	0.192461648	6.091581043	1.12E-09	4.98E-08	-7.302666886	7.302666886
Fgf3	5.262952125	1.172106803	0.405466552	2.890760772	0.003843105	0.02445165	-1.611691835	1.611691835
Cyp11a1	63.10078855	1.171076738	0.215741621	5.428144718	5.69E-08	1.85E-06	-5.733871656	5.733871656
Pld4	42.26308548	1.168884495	0.343047076	3.40735886	0.000655948	0.006016481	-2.220657438	2.220657438
Hbq1a	6.658036358	1.16800607	0.396139269	2.948473329	0.003193477	0.021072705	-1.676279716	1.676279716
5730559C18Rik	10.34481217	1.164888868	0.324418243	3.590700876	0.00032979	0.003377097	-2.471456456	2.471456456
Tlr2	19.86714606	1.162153311	0.360099991	3.227307252	0.001249612	0.010048071	-1.997917326	1.997917326
4632428N05Rik	26.71764485	1.16070867	0.319710402	3.630500171	0.000282873	0.002972362	-2.526898337	2.526898337
Csf1r	41.0460199	1.160686542	0.334071299	3.474367732	0.000512059	0.004849481	-2.31430477	2.31430477
Adcy7	181.1060868	1.160148473	0.18792081	6.173602982	6.68E-10	3.05E-08	-7.515041568	7.515041568
P2ry12	5.708588146	1.158219942	0.444529452	2.605496524	0.00917412	0.047374372	-1.32445653	1.32445653
Mex3b	1399.594146	1.157322814	0.153088106	7.559848014	4.04E-14	3.76E-12	-11.42426455	11.42426455
Gm10494	13.46399161	1.156631782	0.304797425	3.794755752	0.000147789	0.001747593	-2.757559687	2.757559687
Trim14	12.97080359	1.155253317	0.331538473	3.484522648	0.000493016	0.004695467	-2.328321169	2.328321169
Il1r2	13.28384333	1.149483089	0.334079335	3.440748858	0.000580107	0.005417966	-2.266163758	2.266163758
Lyz1	15.333535	1.149476307	0.365985658	3.140768724	0.00168505	0.012618076	-1.899006864	1.899006864
Tmprss5	9.210999877	1.149331815	0.342971142	3.351103556	0.000804902	0.007119735	-2.147536156	2.147536156
Gm1604b	17.56781908	1.144368308	0.294372378	3.887485358	0.000101288	0.001264117	-2.898212607	2.898212607
Prim2	552.6422972	1.142869798	0.12845578	8.89699008	5.74E-19	8.89E-17	-16.05112685	16.05112685
Lgals9	24.05639272	1.141856381	0.309883695	3.684790129	0.000228891	0.002493114	-2.603257863	2.603257863
Sp140	6.503092453	1.141372775	0.436879113	2.612559724	0.008986699	0.046620399	-1.331424017	1.331424017
Frmpd3	82.68754924	1.134319332	0.172022337	6.594023501	4.28E-11	2.39E-09	-8.622407236	8.622407236
Fgf15	44.43949315	1.131901227	0.239980057	4.716647042	2.40E-06	5.07E-05	-4.295237644	4.295237644
Tmem8c	17.18340713	1.130800912	0.281573576	4.016005079	5.92E-05	0.000800747	-3.096504559	3.096504559
Arsb	388.8483152	1.130544466	0.216013886	5.233665706	1.66E-07	4.72E-06	-5.326409104	5.326409104
Rspo3	958.7990619	1.126708914	0.169504062	6.647090952	2.99E-11	1.71E-09	-8.768177525	8.768177525
Megf6	34.28634278	1.122987115	0.28166851	3.986910415	6.69E-05	0.000886539	-3.052302323	3.052302323
A930017M01Rik	763.9341817	1.122884817	0.118001525	9.515850072	1.80E-21	3.42E-19	-18.46602838	18.46602838
Ctsz	104.5196474	1.119992142	0.233847729	4.789407828	1.67E-06	3.68E-05	-4.434405448	4.434405448
Vwa3a	251.7608821	1.115680725	0.193224931	5.773999866	7.74E-09	2.96E-07	-6.528106334	6.528106334
Otx1	5.550834269	1.114348508	0.396532301	2.810233881	0.004950551	0.029749112	-1.526525992	1.526525992
Ncf2	28.98773502	1.113108034	0.300860711	3.699745409	0.000215816	0.002375663	-2.624215219	2.624215219
Gm3279	531.553621	1.109794011	0.159510996	6.957476513	3.46E-12	2.40E-10	-9.620257979	9.620257979
Nyap2	885.5190636	1.109413798	0.169163741	6.55822454	5.45E-11	2.97E-09	-8.527819659	8.527819659
Cd200r1	6.11238292	1.10877556	0.423080009	2.620723116	0.008774349	0.045814367	-1.338998309	1.338998309
Def6	40.60460188	1.107459346	0.219429497	5.046993955	4.49E-07	1.15E-05	-4.939949259	4.939949259
Insc	36.05865619	1.10599557	0.279616413	3.955402892	7.64E-05	0.000996657	-3.001454287	3.001454287
Slc9a9	662.3236943	1.097844152	0.133272897	8.237565032	1.76E-16	2.18E-14	-13.66111482	13.66111482
Sp7	31.7018286	1.097339923	0.293855066	3.734289625	0.000188246	0.002126233	-2.672389187	2.672389187
Vit	96.41278479	1.095340499	0.325536461	3.364724483	0.000766201	0.006855279	-2.163974895	2.163974895
Fbln1	144.7058411	1.089907171	0.188316456	5.787636379	7.14E-09	2.75E-07	-6.561338519	6.561338519
Iqch	8.646954726	1.088045923	0.329498236	3.302129734	0.000959537	0.008183201	-2.087076776	2.087076776
D630003M21Rik	20.83588571	1.087836919	0.265000123	4.105043065	4.04E-05	0.000583418	-3.234020257	3.234020257
Col15a1	24.61620971	1.085595298	0.290656833	3.734972568	0.000187736	0.00212189	-2.673277061	2.673277061
Ppp2r1b	901.8113628	1.076220229	0.148863329	7.229585929	4.84E-13	3.86E-11	-10.41354318	10.41354318
BC039966	7.228677582	1.07449059	0.379558661	2.830894669	0.0046418	0.028357975	-1.547324787	1.547324787
Rag1	27.33767371	1.071821358	0.318890951	3.361090539	0.000776354	0.006925256	-2.159564189	2.159564189
4833418N02Rik	24.46841829	1.071482626	0.256697339	4.174108822	2.99E-05	0.000457566	-3.33954639	3.33954639
Fam64a	34.51339336	1.069908848	0.230557106	4.640537287	3.48E-06	7.01E-05	-4.154238288	4.154238288
Apoc1	7.445586377	1.068660282	0.393909429	2.712959385	0.006668528	0.037151027	-1.430029177	1.430029177
Elf4	6.372104399	1.067450032	0.388154304	2.750066198	0.005958323	0.034157127	-1.466518669	1.466518669
Prr15	94.80482961	1.066789177	0.213100897	5.006028554	5.56E-07	1.38E-05	-4.860822776	4.860822776
Krt1	92.56514026	1.063665487	0.178308092	5.965323712	2.44E-09	1.02E-07	-6.991624299	6.991624299
Kndc1	1483.772246	1.063244057	0.159889692	6.649859933	2.93E-11	1.68E-09	-8.77340178	8.77340178
Ccnb1ip1	11.70394353	1.063081973	0.32403476	3.280765229	0.001035259	0.008675623	-2.061699346	2.061699346
Zdhhc2	4594.509847	1.0583065	0.102458573	10.32911609	5.20E-25	1.27E-22	-21.8950027	21.8950027
Slc25a31	6.162832587	1.053460762	0.375236413	2.807458777	0.004993407	0.029953347	-1.523554644	1.523554644
Plk5	43.06943106	1.05282721	0.228089557	4.615850129	3.91E-06	7.80E-05	-4.107636616	4.107636616
Dysf	38.93418159	1.051927327	0.241990732	4.346973624	1.38E-05	0.000237348	-3.624614958	3.624614958
Birc3	7.335866591	1.051821015	0.4035956	2.606126068	0.009157275	0.047324749	-1.324911681	1.324911681
Proser2	20.72684734	1.048589071	0.280230016	3.741887063	0.000182644	0.00206572	-2.684928569	2.684928569
1700026L06Rik	8.053818332	1.048251543	0.350089105	2.994242121	0.002751275	0.018651731	-1.72928085	1.72928085
Cacna1g	861.2158635	1.046741052	0.177060264	5.911778452	3.38E-09	1.37E-07	-6.862093142	6.862093142
Neurog2	38.47649757	1.045014262	0.238251827	4.38617523	1.15E-05	0.000201864	-3.69494077	3.69494077
Prdm16	68.05522186	1.043969192	0.256197688	4.074857972	4.60E-05	0.00065115	-3.186319225	3.186319225
Tmem132e	282.9587209	1.043664979	0.192906117	5.41022231	6.29E-08	2.01E-06	-5.696956892	5.696956892
Ptprh	44.75530128	1.043038654	0.205566093	5.073981999	3.90E-07	1.02E-05	-4.99211362	4.99211362
A330093E20Rik	24.09490232	1.042762423	0.252103009	4.136255363	3.53E-05	0.000523821	-3.280816995	3.280816995
Cd9	152.9697898	1.037024499	0.362279737	2.862496557	0.004203178	0.026189988	-1.581864695	1.581864695
Il10ra	28.83157563	1.026222476	0.316343415	3.244014026	0.001178579	0.009591081	-2.018132461	2.018132461
Tapbp	387.5765908	1.025682353	0.145052197	7.071125943	1.54E-12	1.14E-10	-9.941877261	9.941877261
Crispld2	43.64485347	1.024830157	0.251178313	4.080090135	4.50E-05	0.00064042	-3.19353541	3.19353541
Slc26a7	71.7002724	1.016868602	0.246770099	4.120712374	3.78E-05	0.000550292	-3.259406539	3.259406539
Hist1h3h	39.49257388	1.013505247	0.257687428	3.933079907	8.39E-05	0.001073642	-2.96914066	2.96914066
Ctxn2	305.4241557	1.008262055	0.189213478	5.328701044	9.89E-08	2.98E-06	-5.525387401	5.525387401
Nckap1l	102.686334	1.005844955	0.258454321	3.891770697	9.95E-05	0.001246599	-2.904273356	2.904273356
Dnajb13	20.58340617	1.005188599	0.305660782	3.288575636	0.001006957	0.008514512	-2.06984025	2.06984025
Pygm	56.69213854	1.003261925	0.258013907	3.888402521	0.000100906	0.001260282	-2.899532135	2.899532135
Prss12	952.5277455	1.000878508	0.165615345	6.04339233	1.51E-09	6.52E-08	-7.185940312	7.185940312
Serpina10	9.362011576	1.000247468	0.338786612	2.952440952	0.003152724	0.020883021	-1.680206678	1.680206678
Irf7	5.712651429	0.998185507	0.377599354	2.643504274	0.008205273	0.043597936	-1.360534074	1.360534074
Kcna3	799.3589933	0.998111964	0.12821037	7.784955026	6.97E-15	7.14E-13	-12.14648761	12.14648761
Sox4	2375.687588	0.997381152	0.167192177	5.96547738	2.44E-09	1.02E-07	-6.991624299	6.991624299
Tmem241	156.2534102	0.996439359	0.250774907	3.973441251	7.08E-05	0.000933098	-3.030072651	3.030072651
Zc3h12a	7.669763573	0.995475417	0.358982921	2.773043951	0.005553462	0.032269704	-1.491205024	1.491205024
Cdkn2a	10.31725812	0.994674041	0.306086832	3.249646631	0.001155485	0.009446376	-2.024734771	2.024734771
LOC102634431	10.51106906	0.994420102	0.318004265	3.1270653	0.001765607	0.013076334	-1.883514004	1.883514004
Crb1	183.1998528	0.992018428	0.179754495	5.518740587	3.41E-08	1.14E-06	-5.944169595	5.944169595
Stx16	1200.098852	0.991719091	0.124002396	7.997580105	1.27E-15	1.42E-13	-12.84802884	12.84802884
Sepp1	184.4764322	0.990598862	0.225274183	4.397303104	1.10E-05	0.00019299	-3.714464485	3.714464485
Abca12	24.90786813	0.989450875	0.30008089	3.297280524	0.000976259	0.008304845	-2.080668494	2.080668494
Hist2h3b	84.51141101	0.987364259	0.274675617	3.594655647	0.000324821	0.003328232	-2.477786441	2.477786441
Ccdc67	6.446880034	0.986655	0.364296557	2.708384093	0.006761172	0.037530952	-1.425610414	1.425610414
Kitl	8217.609964	0.983501569	0.17797442	5.526083848	3.27E-08	1.09E-06	-5.960609415	5.960609415
Gm20751	10.73733993	0.982434553	0.320572029	3.064629674	0.002179397	0.015580564	-1.807416815	1.807416815
Lrrc75b	372.5452232	0.981401088	0.191744708	5.118269494	3.08E-07	8.33E-06	-5.079306755	5.079306755
Rsph4a	480.9417795	0.977156119	0.169300492	5.771726388	7.85E-09	3.00E-07	-6.523228083	6.523228083
Gm4890	40.61286366	0.976702893	0.23391516	4.175457865	2.97E-05	0.000456102	-3.340938121	3.340938121
Arhgap22	22.8956318	0.975669465	0.265327119	3.67723235	0.000235778	0.002557066	-2.592258069	2.592258069
Inpp5d	49.3640147	0.975015595	0.269328528	3.620171997	0.000294407	0.003076337	-2.511966073	2.511966073
Lor	27.10418992	0.973445226	0.238934094	4.074116053	4.62E-05	0.000652682	-3.18529837	3.18529837
Fhl3	12.07339472	0.971086846	0.337233321	2.879569676	0.003982183	0.025128229	-1.599838117	1.599838117
Gpsm3	9.81421618	0.969584443	0.319090538	3.038587259	0.002376903	0.016671882	-1.778015381	1.778015381
Lect1	16.80845967	0.969522011	0.293009628	3.308840119	0.000936833	0.00802606	-2.095497574	2.095497574
Pcdhgc3	1465.113201	0.965611864	0.142979774	6.753485755	1.44E-11	8.83E-10	-9.054011596	9.054011596
Cyba	46.13879774	0.961932526	0.230239892	4.177957687	2.94E-05	0.00045194	-3.344919245	3.344919245
Tspan5	3033.344096	0.958632472	0.214376451	4.471724696	7.76E-06	0.000143821	-3.842178701	3.842178701
Rgag1	147.0171542	0.95768342	0.220424141	4.344730191	1.39E-05	0.000239056	-3.621500428	3.621500428
Dcdc2a	41.04551446	0.957096731	0.243198395	3.935456603	8.30E-05	0.001064686	-2.972778612	2.972778612
Pcdhgc5	201.2500158	0.950146181	0.204531023	4.645486854	3.39E-06	6.86E-05	-4.163607346	4.163607346
Amz1	200.7162079	0.949951187	0.191439275	4.96215412	6.97E-07	1.67E-05	-4.776098316	4.776098316
Pou3f2	1624.549553	0.949495066	0.133007008	7.138684492	9.42E-13	7.33E-11	-10.13475142	10.13475142
Cdk18	54.94275604	0.94904347	0.236323642	4.015863428	5.92E-05	0.000800747	-3.096504559	3.096504559
Zkscan16	364.9808594	0.948783171	0.147345408	6.439177052	1.20E-10	6.24E-09	-8.204730363	8.204730363
Disp2	3163.692809	0.946639155	0.156324141	6.055617166	1.40E-09	6.09E-08	-7.215548336	7.215548336
Mpped2	1562.411052	0.946337897	0.142327435	6.649019559	2.95E-11	1.69E-09	-8.772396975	8.772396975
Krt17	7.390296726	0.945984019	0.366166788	2.583478489	0.009780957	0.049717409	-1.30349151	1.30349151
Npas1	65.16581277	0.945504062	0.25527926	3.703802899	0.000212391	0.002345611	-2.629743967	2.629743967
Nfatc2	130.7882443	0.941251052	0.213289277	4.413025648	1.02E-05	0.000182004	-3.739919515	3.739919515
4930577N17Rik	14.22533672	0.939122247	0.275025296	3.414675886	0.000638579	0.005873123	-2.231130923	2.231130923
Ppfibp2	40.316731	0.935782	0.236791214	3.951928721	7.75E-05	0.001010083	-2.995642973	2.995642973
Rassf5	192.5809367	0.934434561	0.155241382	6.019236295	1.75E-09	7.49E-08	-7.12543237	7.12543237
Gng4	7840.800891	0.934097924	0.141572919	6.597998635	4.17E-11	2.34E-09	-8.631293725	8.631293725
Tle4	973.4058811	0.93276793	0.151904579	6.140485925	8.23E-10	3.71E-08	-7.430106358	7.430106358
Eml2	1950.205221	0.930266888	0.148341656	6.271110303	3.58E-10	1.72E-08	-7.76454787	7.76454787
Rsg1	24.73394583	0.929398574	0.263177771	3.531447857	0.000413291	0.004066922	-2.390734196	2.390734196
Emid1	38.62045691	0.928501521	0.243996864	3.805383007	0.000141585	0.001682479	-2.774050273	2.774050273
Aqp11	134.7852911	0.928404589	0.216946445	4.279418317	1.87E-05	0.000308095	-3.511314884	3.511314884
Cpne5	520.6174949	0.926938848	0.187893565	4.933318751	8.08E-07	1.90E-05	-4.720344248	4.720344248
Baiap3	50.45859014	0.924342234	0.23229215	3.979222866	6.91E-05	0.00091212	-3.03994813	3.03994813
Zbtb20	914.1142836	0.924084225	0.181465148	5.092350976	3.54E-07	9.37E-06	-5.028038174	5.028038174
Etnk2	183.0421167	0.923869386	0.173482915	5.325420003	1.01E-07	3.03E-06	-5.518597958	5.518597958
Tbr1	621.4412655	0.921076966	0.174849319	5.267832743	1.38E-07	4.03E-06	-5.395134897	5.395134897
Armc3	24.9443479	0.920237509	0.254572254	3.614838196	0.000300535	0.003134551	-2.503824628	2.503824628
Tigd3	114.0121339	0.917342537	0.17397266	5.272912056	1.34E-07	3.92E-06	-5.406402927	5.406402927
Gm5820	57.93558189	0.917153257	0.226741863	4.044922463	5.23E-05	0.00072385	-3.140351475	3.140351475
Wdr16	18.967487	0.917113428	0.320232612	2.863897662	0.004184632	0.026103322	-1.583304214	1.583304214
Nek11	57.95677745	0.914892476	0.199974076	4.575055402	4.76E-06	9.33E-05	-4.030287788	4.030287788
Tmem88b	11.61464354	0.913758379	0.315730567	2.894108061	0.003802373	0.024274808	-1.614844197	1.614844197
Ifi27	279.1777231	0.913017954	0.224697753	4.06331591	4.84E-05	0.000676846	-3.169510306	3.169510306
Nrn1	3521.211664	0.911229662	0.140003061	6.508641016	7.58E-11	4.07E-09	-8.390921512	8.390921512
Myt1l	6303.812728	0.911113982	0.203198404	4.483863862	7.33E-06	0.000136472	-3.864956152	3.864956152
Hist1h4i	443.3156606	0.909488722	0.315223372	2.885219821	0.003911404	0.024764895	-1.606163505	1.606163505
Ypel1	3351.334342	0.907304653	0.171547049	5.28895518	1.23E-07	3.61E-06	-5.442175831	5.442175831
Prrt4	115.9838139	0.907022707	0.226565485	4.003357829	6.24E-05	0.000839591	-3.075932246	3.075932246
Sema4d	341.2331026	0.901621782	0.179409431	5.025498242	5.02E-07	1.26E-05	-4.899028768	4.899028768
Hdac9	7002.575394	0.901161282	0.145646909	6.187301134	6.12E-10	2.82E-08	-7.549181717	7.549181717
Mir124a-2	13.57576994	0.897559631	0.311054816	2.885535235	0.003907487	0.024764895	-1.606163505	1.606163505
Spr	399.3173787	0.894615203	0.127738816	7.00347186	2.50E-12	1.79E-10	-9.747973491	9.747973491
Slc23a1	24.59217721	0.89317711	0.285767817	3.125534287	0.001774824	0.013136587	-1.881517439	1.881517439
Evi2a	19.86651294	0.892271361	0.323346467	2.759490059	0.005789165	0.033397963	-1.476280021	1.476280021
AW495222	11.14426113	0.892153027	0.343459035	2.597552942	0.009389065	0.048205841	-1.316900333	1.316900333
Hist1h4d	2399.579922	0.891759308	0.293080584	3.042710292	0.002344579	0.016489221	-1.782799848	1.782799848
Bcl6b	18.29116531	0.890633905	0.284698099	3.128345105	0.001757936	0.013030954	-1.885023773	1.885023773
Ptch2	19.80084305	0.889701494	0.294655726	3.019461072	0.002532248	0.017452876	-1.758133007	1.758133007
Arid5b	1240.11779	0.888897436	0.167489092	5.307195973	1.11E-07	3.32E-06	-5.479465637	5.479465637
Agbl4	58.64720151	0.888355154	0.205666276	4.319401169	1.56E-05	0.000264982	-3.576784051	3.576784051
Eln	50.69839105	0.887694503	0.260759867	3.404260454	0.000663435	0.006068666	-2.216906782	2.216906782
Zfp608	1213.831201	0.885508142	0.125963568	7.029875026	2.07E-12	1.50E-10	-9.824449561	9.824449561
Resp18	208.2767411	0.885158655	0.232054454	3.814443721	0.00013649	0.001627663	-2.788435519	2.788435519
Hap1	3213.082181	0.883754172	0.1681344	5.256236509	1.47E-07	4.24E-06	-5.372213727	5.372213727
Tcfl5	259.8230843	0.883001168	0.13404883	6.587160548	4.48E-11	2.49E-09	-8.603761173	8.603761173
Mfap2	92.51799235	0.880368304	0.220456665	3.99338484	6.51E-05	0.000866062	-3.062451043	3.062451043
Cidea	40.67425086	0.879263295	0.276484041	3.180159306	0.001471941	0.011415354	-1.942510606	1.942510606
Gm17762	32.42891166	0.879238421	0.271229135	3.241681319	0.001188268	0.009651321	-2.015413239	2.015413239
Ttc7	93.84869703	0.879150382	0.155694671	5.646631155	1.64E-08	5.89E-07	-6.229803431	6.229803431
Dfna5	324.2770411	0.878804648	0.136050428	6.459403776	1.05E-10	5.50E-09	-8.260005675	8.260005675
Arsj	38.43357187	0.877482062	0.266316539	3.294883844	0.000984624	0.008359153	-2.077837712	2.077837712
Fermt3	24.27879064	0.874293949	0.289706736	3.01785855	0.002545677	0.01751683	-1.75654448	1.75654448
Tpcn1	274.0735856	0.873760252	0.226620048	3.855617636	0.000115438	0.001408151	-2.851350886	2.851350886
Mnd1	57.45811886	0.870829199	0.207598782	4.19477028	2.73E-05	0.000425889	-3.370703212	3.370703212
Gm13375	92.61434716	0.870794744	0.203535085	4.278352033	1.88E-05	0.000309273	-3.509657331	3.509657331
Hist1h3a	120.0389862	0.869475072	0.235466466	3.69256432	0.000222004	0.002435081	-2.613486598	2.613486598
Ahi1	12215.4741	0.868311648	0.096141321	9.031617611	1.69E-19	2.75E-17	-16.56122791	16.56122791
Fam102b	4319.174143	0.867370138	0.159011598	5.454760216	4.90E-08	1.60E-06	-5.796261601	5.796261601
Nhsl2	544.5189749	0.866849761	0.210542837	4.117213255	3.83E-05	0.000556311	-3.254682116	3.254682116
Grn	622.3142267	0.866056564	0.213914022	4.048619887	5.15E-05	0.000714266	-3.146140086	3.146140086
Emilin2	22.20968323	0.864234068	0.272614479	3.170169364	0.001523501	0.011698881	-1.931855676	1.931855676
Fam109b	19.55875308	0.863981115	0.266095195	3.246887323	0.001166746	0.009522314	-2.021257491	2.021257491
Meig1	63.70174956	0.863860583	0.192120774	4.496445459	6.91E-06	0.000129645	-3.88724463	3.88724463
Lhx2	1897.798052	0.863314469	0.160397525	5.382342835	7.35E-08	2.32E-06	-5.635217366	5.635217366
Fam69c	17.60022919	0.862090228	0.286905707	3.004785922	0.002657678	0.018133838	-1.74151028	1.74151028
Ttc28	1133.439296	0.861200609	0.211703588	4.067954717	4.74E-05	0.000667385	-3.175623359	3.175623359
Nrep	11987.01526	0.860455165	0.184208807	4.671085921	3.00E-06	6.18E-05	-4.208667934	4.208667934
Dnah6	298.8387937	0.859409933	0.141564329	6.070808501	1.27E-09	5.60E-08	-7.252085638	7.252085638
Ada	91.55375205	0.859212662	0.214167373	4.01187469	6.02E-05	0.00081245	-3.090203579	3.090203579
Sema3f	121.830726	0.858434184	0.230388384	3.726030665	0.000194519	0.002181038	-2.661336717	2.661336717
Nav1	3798.415217	0.856689448	0.242817062	3.528127059	0.000418511	0.0041111	-2.386041989	2.386041989
Ppp1r18	257.5065057	0.85663069	0.171619836	4.991443345	5.99E-07	1.47E-05	-4.832739649	4.832739649
A730017C20Rik	746.7931967	0.856456923	0.15943472	5.371834463	7.79E-08	2.42E-06	-5.616313705	5.616313705
Syt13	1897.044622	0.854599412	0.137022902	6.236909297	4.46E-10	2.11E-08	-7.675513976	7.675513976
Gm10638	30.31369793	0.850752217	0.242293221	3.511250595	0.000446004	0.004325131	-2.364000719	2.364000719
BC021891	150.1540335	0.84953004	0.139821613	6.075813485	1.23E-09	5.45E-08	-7.263359651	7.263359651
Il34	48.3180859	0.846919737	0.263656959	3.212203236	0.001317212	0.010457186	-1.98058517	1.98058517
Padi2	25.40109859	0.845475988	0.257162136	3.287715686	0.001010038	0.008536286	-2.068731044	2.068731044
Nfia	983.0503721	0.845277524	0.171489034	4.929047084	8.26E-07	1.94E-05	-4.712055626	4.712055626
Slco2a1	16.52650062	0.843874914	0.278203897	3.033296525	0.002418978	0.016885199	-1.772493827	1.772493827
Nipal3	2248.466384	0.843866788	0.161130502	5.237163514	1.63E-07	4.64E-06	-5.333171901	5.333171901
Galns	386.95129	0.843181686	0.151438946	5.5677995	2.58E-08	8.91E-07	-6.050202064	6.050202064
Stag1	2864.644958	0.841516505	0.129370676	6.504692816	7.79E-11	4.16E-09	-8.380888842	8.380888842
2310015A10Rik	93.22911088	0.839612044	0.188449307	4.455373482	8.37E-06	0.00015388	-3.812818054	3.812818054
Lix1	2054.294528	0.838718112	0.154786466	5.418549399	6.01E-08	1.93E-06	-5.713561662	5.713561662
Gm10639	21.80489507	0.838028536	0.299818946	2.795115343	0.00518812	0.03079318	-1.511545463	1.511545463
Trpm8	76.05411579	0.837987975	0.197334089	4.246544411	2.17E-05	0.000349127	-3.457017165	3.457017165
Fzd1	616.5134721	0.837750329	0.18327643	4.570965996	4.85E-06	9.46E-05	-4.024296992	4.024296992
Cobl	796.0303346	0.837256568	0.253876225	3.297892777	0.000974133	0.008290935	-2.081396515	2.081396515
Cpe	14025.8237	0.836570557	0.261384093	3.200541194	0.001371698	0.010813485	-1.966034303	1.966034303
Cln6	86.15171708	0.834984718	0.168330818	4.960379375	7.04E-07	1.69E-05	-4.772746962	4.772746962
Rnasel	570.0038609	0.832504541	0.193902231	4.293424255	1.76E-05	0.000292123	-3.534433641	3.534433641
Cdo1	1252.14744	0.831166353	0.100999223	8.229433137	1.88E-16	2.32E-14	-13.63480162	13.63480162
Hlcs	247.3126876	0.830903424	0.144096126	5.766313414	8.10E-09	3.08E-07	-6.511240788	6.511240788
Parva	1398.46798	0.83086734	0.136682609	6.078808022	1.21E-09	5.37E-08	-7.270328596	7.270328596
Mb21d1	29.50440978	0.830467429	0.289380881	2.86980752	0.004107217	0.025759758	-1.589058224	1.589058224
Myo18b	58.5031455	0.82811641	0.228600901	3.622542187	0.000291722	0.003052054	-2.515407763	2.515407763
Fblim1	95.19128186	0.827973568	0.205656844	4.025995694	5.67E-05	0.000775099	-3.110642716	3.110642716
AI504432	3463.010439	0.825527271	0.154390589	5.347005132	8.94E-08	2.74E-06	-5.562970431	5.562970431
Rad51d	393.69969	0.824662866	0.118672958	6.949037755	3.68E-12	2.52E-10	-9.597812986	9.597812986
1190005I06Rik	49.72569777	0.8243347	0.230886032	3.570309954	0.000356559	0.003590254	-2.444874792	2.444874792
Plekhd1	18.19505216	0.824071851	0.29838513	2.761772514	0.005748852	0.033192263	-1.478963137	1.478963137
Ccdc110	25.80138956	0.822728308	0.268729533	3.061547786	0.002201958	0.015701972	-1.804045801	1.804045801
Cirbp	1791.133227	0.821953686	0.111028778	7.4030688	1.33E-13	1.15E-11	-10.94064012	10.94064012
Card9	10.55585723	0.820593137	0.315586674	2.600214792	0.009316543	0.047956258	-1.319154712	1.319154712
Nos1	429.695465	0.819216201	0.281401144	2.911204235	0.003600386	0.023240106	-1.633761899	1.633761899
2610018G03Rik	29.90598506	0.818749617	0.233020068	3.51364423	0.000442004	0.004299358	-2.366596362	2.366596362
Camta1	5180.465683	0.817899673	0.153471609	5.329322332	9.86E-08	2.98E-06	-5.526096637	5.526096637
D930028M14Rik	15.11677006	0.815771347	0.280944398	2.90367543	0.003688103	0.023706625	-1.625130266	1.625130266
5830403L16Rik	31.89380076	0.814401738	0.256674391	3.172898301	0.001509254	0.011624655	-1.934619917	1.934619917
Gabra3	1007.698507	0.81080307	0.216067682	3.752542081	0.00017505	0.001998581	-2.699278192	2.699278192
Ctsc	77.0388266	0.809083098	0.241648866	3.348176678	0.000813451	0.007176562	-2.144083563	2.144083563
Scn9a	25.11515632	0.80849475	0.274255116	2.947965976	0.003198723	0.021090836	-1.675906203	1.675906203
Fam174b	2097.566582	0.808117805	0.127923407	6.31720046	2.66E-10	1.31E-08	-7.88405101	7.88405101
Slc1a2	11239.39506	0.808101908	0.116853041	6.915540221	4.66E-12	3.15E-10	-9.50194924	9.50194924
Mir1938	28.44789725	0.806430479	0.285334159	2.826266863	0.004709401	0.028636279	-1.543083409	1.543083409
Rnf182	671.7202035	0.805354568	0.172249018	4.675524875	2.93E-06	6.06E-05	-4.217527258	4.217527258
Mamdc2	48.05145049	0.80400906	0.254311744	3.161509751	0.001569536	0.011954524	-1.922467729	1.922467729
Baiap2l2	45.1109405	0.803897269	0.293125957	2.742497721	0.006097387	0.034748728	-1.459061084	1.459061084
Cdh26	19.59521673	0.802064777	0.29332373	2.734401265	0.006249383	0.035483486	-1.449973717	1.449973717
Hist1h4b	62.71827541	0.800650148	0.306188537	2.614892626	0.008925551	0.046374416	-1.333721542	1.333721542
Adamts8	361.3789339	0.80047816	0.211677789	3.781587876	0.000155831	0.001817241	-2.74058738	2.74058738
5330426P16Rik	406.4604428	0.798814643	0.183707953	4.348285579	1.37E-05	0.000236414	-3.626326596	3.626326596
Rnase4	400.2479785	0.797081417	0.174854613	4.558538106	5.15E-06	1.00E-04	-4.000093166	4.000093166
Kiss1r	173.5870423	0.79582329	0.148998593	5.341146343	9.24E-08	2.82E-06	-5.550495969	5.550495969
Creb3l3	16.51668093	0.795147288	0.286214696	2.778149754	0.005466942	0.031968017	-1.4952843	1.4952843
Stard10	385.3176952	0.793752646	0.179265602	4.427802311	9.52E-06	0.00017248	-3.763260886	3.763260886
Clmp	934.8147284	0.79078417	0.152843645	5.173811254	2.29E-07	6.35E-06	-5.197273006	5.197273006
Pappa2	13.25718971	0.785110472	0.298842037	2.627175482	0.008609692	0.045150081	-1.345341466	1.345341466
Arhgdib	237.2626034	0.784238574	0.219015399	3.580746275	0.000342614	0.003476793	-2.458821131	2.458821131
Siah3	64.54639954	0.784237366	0.220631407	3.554513737	0.000378679	0.003779178	-2.422602663	2.422602663
Rpgrip1	36.08645	0.783381135	0.234816435	3.336142698	0.000849495	0.007417053	-2.129768613	2.129768613
Prokr2	1036.5598	0.783372524	0.149646223	5.234829899	1.65E-07	4.69E-06	-5.328415603	5.328415603
Cd1d1	82.2429539	0.781381115	0.219471811	3.560280072	0.000370459	0.003714714	-2.430074605	2.430074605
Faim2	1491.234847	0.781030098	0.176808578	4.417376722	9.99E-06	0.000179661	-3.745547163	3.745547163
Fbxl21	84.77443864	0.779775404	0.208382888	3.742031855	0.000182538	0.00206572	-2.684928569	2.684928569
Syndig1l	108.3785624	0.777416563	0.181827769	4.275565652	1.91E-05	0.000312351	-3.505356678	3.505356678
E330009J07Rik	654.2134829	0.777375726	0.109548055	7.096207489	1.28E-12	9.71E-11	-10.01279886	10.01279886
Tm7sf2	1064.639072	0.775792442	0.152831444	5.07613108	3.85E-07	1.01E-05	-4.995731646	4.995731646
Pcdh17	4775.501424	0.775784416	0.140062691	5.538837004	3.04E-08	1.02E-06	-5.989608371	5.989608371
Meis2	3295.075768	0.775144268	0.161133373	4.810575574	1.50E-06	3.35E-05	-4.474655424	4.474655424
Gm14634	19.12629972	0.773097688	0.276512042	2.795891575	0.005175676	0.030753833	-1.512100755	1.512100755
Nap1l5	7810.247869	0.77149901	0.110833548	6.960879873	3.38E-12	2.36E-10	-9.627174013	9.627174013
Sesn3	977.3338696	0.769642049	0.204717091	3.759539781	0.000170226	0.001950095	-2.70994427	2.70994427
Blnk	31.13939145	0.76908434	0.282750948	2.720006231	0.006528069	0.03667098	-1.435677481	1.435677481
Nr2f2	236.4024298	0.768229788	0.276558162	2.777823591	0.005472432	0.031972617	-1.495221813	1.495221813
Chrna3	18.63895687	0.766518935	0.295385965	2.59497412	0.009459804	0.048478984	-1.314446488	1.314446488
L3mbtl1	161.3014193	0.765006935	0.183696468	4.164516303	3.12E-05	0.000475082	-3.32323161	3.32323161
Rapgef6	1886.431085	0.763970649	0.146160618	5.226925413	1.72E-07	4.86E-06	-5.313483746	5.313483746
Dazl	91.70996859	0.763438645	0.17549227	4.350269348	1.36E-05	0.000234525	-3.629811495	3.629811495
Itpkb	60.48146458	0.761174718	0.25818768	2.948145001	0.003196871	0.021086859	-1.675988099	1.675988099
Capn5	1176.650258	0.759409018	0.151349472	5.017586158	5.23E-07	1.31E-05	-4.882426049	4.882426049
Rimbp3	75.61090685	0.757192321	0.171522662	4.414532234	1.01E-05	0.000181459	-3.741220746	3.741220746
Cntn2	1107.682615	0.757005591	0.166638686	4.542796213	5.55E-06	0.000107008	-3.970583317	3.970583317
Gm10941	22.25573644	0.756398409	0.248606563	3.042552059	0.002345812	0.016491002	-1.782752945	1.782752945
Dnah5	738.1944355	0.75636529	0.182596618	4.142274354	3.44E-05	0.000512058	-3.290681077	3.290681077
4930444P10Rik	15.68942139	0.752176936	0.284390986	2.644869118	0.008172252	0.043463511	-1.361875195	1.361875195
Lphn1	9773.146283	0.750773932	0.156869094	4.785990117	1.70E-06	3.72E-05	-4.429267675	4.429267675
Pax6	158.5723301	0.750153926	0.16234181	4.620830119	3.82E-06	7.64E-05	-4.117030547	4.117030547
Jun	2659.580384	0.749751786	0.148486997	5.049275707	4.43E-07	1.14E-05	-4.942494895	4.942494895
Ston2	252.4409054	0.749125161	0.196116751	3.819791821	0.000133564	0.001597497	-2.796559992	2.796559992
Gpr123	1070.421941	0.748107709	0.152839031	4.894742543	9.84E-07	2.27E-05	-4.643688518	4.643688518
4930539E08Rik	130.6440303	0.746634964	0.200167049	3.730059313	0.000191435	0.002156482	-2.666254186	2.666254186
Gch1	84.72628245	0.746175835	0.249092415	2.995578303	0.00273925	0.018598701	-1.730517391	1.730517391
Hist1h2bl	108.0420659	0.744740285	0.224975057	3.310323794	0.000931881	0.007995805	-2.097137833	2.097137833
Fry	4105.666523	0.744269386	0.168789073	4.409464275	1.04E-05	0.000184582	-3.733810091	3.733810091
Wipf1	20.43622573	0.743715898	0.282920471	2.628710098	0.008570939	0.045007442	-1.346715665	1.346715665
Col16a1	126.2936883	0.742754597	0.196833458	3.773518007	0.000160962	0.001860276	-2.730422644	2.730422644
Rhbdl1	1070.775352	0.742570183	0.163864484	4.531611519	5.85E-06	0.000112285	-3.949676582	3.949676582
Kcnk4	73.9616479	0.742259233	0.197356379	3.761009579	0.000169229	0.001941304	-2.711906369	2.711906369
Rnf128	781.7242531	0.741376991	0.133297354	5.561828266	2.67E-08	9.18E-07	-6.037103734	6.037103734
Lmo1	896.5370835	0.740887851	0.141134457	5.249517856	1.52E-07	4.39E-06	-5.357847687	5.357847687
A830082K12Rik	336.2434183	0.740317749	0.141747288	5.22280008	1.76E-07	4.96E-06	-5.304525818	5.304525818
Tubb4a	3374.436979	0.739935897	0.187500897	3.946305906	7.94E-05	0.001026956	-2.988448126	2.988448126
Timp4	26.99617335	0.739850569	0.270482315	2.735301083	0.006232324	0.035422089	-1.450725832	1.450725832
Kcnc4	603.9329909	0.738065147	0.137500133	5.367741319	7.97E-08	2.46E-06	-5.609638584	5.609638584
Slc6a7	240.7262691	0.737735838	0.194451836	3.793925805	0.000148284	0.001749772	-2.757018557	2.757018557
Hpcal4	6822.613771	0.736830319	0.185087802	3.980977199	6.86E-05	0.00090683	-3.042474039	3.042474039
Doc2b	377.6547095	0.736504261	0.214260865	3.437418501	0.000587287	0.005472922	-2.261780706	2.261780706
Dmrtb1	56.03228695	0.735866097	0.231399155	3.180072529	0.001472382	0.011415354	-1.942510606	1.942510606
Efna4	45.19929389	0.735801046	0.211733919	3.475121273	0.000510622	0.004838592	-2.315281008	2.315281008
Maats1	78.02026552	0.734983273	0.170581457	4.308693846	1.64E-05	0.000274831	-3.560934351	3.560934351
Mrgpre	237.9239118	0.733425944	0.137916647	5.317892785	1.05E-07	3.15E-06	-5.501892034	5.501892034
Fhit	91.88774181	0.732981369	0.201443689	3.638641519	0.00027408	0.002894381	-2.538444329	2.538444329
Nfix	2787.876703	0.732327379	0.209088941	3.502468259	0.000460969	0.004447953	-2.351839824	2.351839824
Emx2os	57.37548175	0.731984732	0.259203111	2.823981279	0.004743116	0.028799802	-1.540610501	1.540610501
Kcnq3	750.1038865	0.731470504	0.212372024	3.444288416	0.000572565	0.005359382	-2.270885273	2.270885273
3110039I08Rik	62.76558467	0.731322171	0.20091662	3.639928692	0.000272714	0.002883557	-2.540071408	2.540071408
Maob	30.14029219	0.73129864	0.257582611	2.839083886	0.004524326	0.027781008	-1.556252007	1.556252007
Gse1	390.7426813	0.729370956	0.18909023	3.857264111	0.000114663	0.001401016	-2.853557023	2.853557023
Msantd1	252.4648107	0.729087052	0.151630935	4.808300194	1.52E-06	3.38E-05	-4.471388817	4.471388817
Prr5	133.6786258	0.728789942	0.181031898	4.02575429	5.68E-05	0.000775268	-3.110548344	3.110548344
1300002E11Rik	39.05113987	0.728617413	0.226785284	3.212807286	0.001314445	0.010449958	-1.980885459	1.980885459
Cdc42ep2	368.2657472	0.728047551	0.127876642	5.693358355	1.25E-08	4.61E-07	-6.33604356	6.33604356
Osbp2	1023.99191	0.727778223	0.103306888	7.044817998	1.86E-12	1.36E-10	-9.865379614	9.865379614
Nol4	7028.763008	0.727188861	0.098162593	7.40800382	1.28E-13	1.12E-11	-10.95233742	10.95233742
Igsf1	78.45843077	0.726083802	0.167110251	4.34493873	1.39E-05	0.000239056	-3.621500428	3.621500428
Calhm2	21.7529951	0.72591766	0.268194291	2.706685728	0.006795856	0.037636871	-1.424386491	1.424386491
Vwa5b1	40.64428129	0.724732367	0.277005778	2.61630776	0.00888864	0.046196853	-1.335387604	1.335387604
Ccdc184	1331.11269	0.724130426	0.143937545	5.030865468	4.88E-07	1.23E-05	-4.909238682	4.909238682
Pced1b	46.0417181	0.723580008	0.201904515	3.583773285	0.000338666	0.003448669	-2.462348495	2.462348495
Irf2bpl	1368.277597	0.719577678	0.179080135	4.018188168	5.86E-05	0.000795437	-3.099394127	3.099394127
Cntfr	337.8999764	0.719041074	0.189750178	3.789409214	0.000151006	0.001771985	-2.751539849	2.751539849
Syn3	2195.657102	0.719009565	0.211524085	3.39918532	0.000675869	0.006155731	-2.210720389	2.210720389
2610035D17Rik	226.3566102	0.716524765	0.194888025	3.676597189	0.000236366	0.00256015	-2.591734641	2.591734641
Tspo	20.26894967	0.716442284	0.275149799	2.603826306	0.009218946	0.047563391	-1.322727194	1.322727194
Lrtm2	339.393363	0.715925931	0.166589695	4.297540324	1.73E-05	0.000287318	-3.541637239	3.541637239
Alk	64.76105922	0.708941791	0.217217763	3.263737648	0.001099529	0.009096841	-2.041109419	2.041109419
Zfp663	21.2376062	0.70678018	0.258345213	2.735797471	0.006222931	0.035392529	-1.451088408	1.451088408
Fank1	193.2156636	0.706477134	0.161161495	4.383659598	1.17E-05	0.000203821	-3.690751499	3.690751499
9330159F19Rik	4001.072083	0.705350613	0.171268155	4.118399074	3.82E-05	0.000554887	-3.255795421	3.255795421
Pbx4	184.009314	0.705212671	0.183325365	3.846781766	0.000119679	0.001457035	-2.836529982	2.836529982
Crip2	1899.897989	0.704176801	0.266789403	2.639448168	0.008304112	0.043915827	-1.357378933	1.357378933
1700001L19Rik	781.6896682	0.703982583	0.192610625	3.654951979	0.00025723	0.002738706	-2.562454576	2.562454576
Armc2	277.479205	0.703094611	0.140055171	5.020126039	5.16E-07	1.30E-05	-4.887522343	4.887522343
Itgb2	35.45539387	0.702832654	0.22183326	3.168292493	0.001533372	0.011769325	-1.92924846	1.92924846
Ism2	36.61445433	0.701917731	0.22299025	3.147750769	0.001645319	0.012401317	-1.906532189	1.906532189
Gm8773	82.58657364	0.700820239	0.204670628	3.424136846	0.000616756	0.005697229	-2.244336341	2.244336341
Klhl21	132.5126955	0.700114301	0.229306316	3.053183683	0.002264273	0.016064921	-1.794121394	1.794121394
Slc17a8	71.32665096	0.69964763	0.232034528	3.015273791	0.002567474	0.017645243	-1.753372358	1.753372358
Fstl3	38.75597574	0.698769878	0.220861174	3.163842091	0.001557012	0.011907479	-1.924180189	1.924180189
Adamts5	118.1674711	0.697965116	0.232852573	2.99745503	0.00272244	0.018499447	-1.732841256	1.732841256
Hist1h2be	709.458241	0.697559902	0.194391302	3.588431667	0.000332673	0.003402495	-2.468202526	2.468202526
Dnm3	4479.048751	0.694239292	0.173028358	4.012286194	6.01E-05	0.000811683	-3.090613794	3.090613794
Zswim7	271.473158	0.693147277	0.168171383	4.121671985	3.76E-05	0.000549388	-3.260121088	3.260121088
Sfrp2	45.45432855	0.692711863	0.221983746	3.120552187	0.001805123	0.013299	-1.876181005	1.876181005
Tchh	60.66556234	0.69211074	0.225900098	3.06379124	0.002185514	0.015611076	-1.806567173	1.806567173
Klf11	386.9986085	0.691051818	0.170721237	4.04783746	5.17E-05	0.000716069	-3.145044996	3.145044996
Zfp580	104.2809509	0.690892054	0.21421654	3.225204052	0.001258829	0.010102941	-1.995552172	1.995552172
Synj2	284.396151	0.68993657	0.205802189	3.352425812	0.000801067	0.007089528	-2.149382702	2.149382702
Hist1h2bh	46.01781629	0.687504288	0.238139618	2.886979895	0.003889591	0.024673039	-1.607777347	1.607777347
B3glct	299.6823023	0.686982337	0.169043862	4.063929505	4.83E-05	0.000675813	-3.170173692	3.170173692
Skap1	24.58078722	0.68677809	0.247443702	2.775492304	0.00551182	0.032094	-1.493576156	1.493576156
Tmod3	735.189808	0.684464885	0.174882006	3.913866835	9.08E-05	0.001153196	-2.938096786	2.938096786
Chadl	54.90014311	0.683232616	0.199980931	3.416488827	0.000634343	0.005843704	-2.233311756	2.233311756
Nrros	47.26445217	0.681970696	0.236480239	2.883837986	0.003928608	0.024845872	-1.604745765	1.604745765
Csdc2	3222.915199	0.681717197	0.149065829	4.573262725	4.80E-06	9.38E-05	-4.027576193	4.027576193
Mturn	18757.88155	0.680165588	0.107448787	6.330137411	2.45E-10	1.21E-08	-7.916162621	7.916162621
Spred2	663.986115	0.6791552	0.14231416	4.772225039	1.82E-06	3.95E-05	-4.403458112	4.403458112
Fbxl15	231.6262537	0.677076308	0.205038229	3.302195448	0.000959312	0.008183201	-2.087076776	2.087076776
Nfatc1	27.05966171	0.67337343	0.256655963	2.623642257	0.008699511	0.045564497	-1.341373421	1.341373421
Nrp2	1542.90909	0.672559119	0.191356085	3.514699402	0.000440252	0.004287252	-2.367820955	2.367820955
Gpx8	590.2685305	0.672179147	0.209192755	3.213204719	0.001312627	0.010449958	-1.980885459	1.980885459
Gprin2	119.2102351	0.67146294	0.191246229	3.510986558	0.000446447	0.004325131	-2.364000719	2.364000719
Slc36a1	838.0691884	0.671073662	0.140629332	4.771932385	1.82E-06	3.95E-05	-4.403384046	4.403384046
Palm2	2216.539166	0.670633445	0.177683639	3.77431175	0.00016045	0.001855725	-2.731486311	2.731486311
Man2c1os	23.30704766	0.670607503	0.259202362	2.587196728	0.009676033	0.049317686	-1.306997308	1.306997308
Unc13c	103.6292019	0.670370429	0.22442186	2.987099511	0.00281638	0.019015353	-1.720895605	1.720895605
Ets1	45.48851397	0.669319583	0.214726881	3.117074018	0.001826557	0.013433468	-1.871811855	1.871811855
Drc1	701.0848843	0.668900419	0.104647286	6.3919519	1.64E-10	8.26E-09	-8.083253377	8.083253377
Park2	549.1317402	0.666990673	0.169732028	3.929668905	8.51E-05	0.001084873	-2.964620974	2.964620974
Cacna2d4	28.55186966	0.665954023	0.247168783	2.69432901	0.007053051	0.038718404	-1.412082552	1.412082552
Ankrd6	1087.330537	0.6658301	0.087762931	7.586689432	3.28E-14	3.11E-12	-11.5067779	11.5067779
Ccdc135	41.46629173	0.665534573	0.229358758	2.901718594	0.003711218	0.023809886	-1.623242688	1.623242688
Slc26a8	46.8197586	0.663555414	0.220918918	3.003615169	0.002667926	0.018194907	-1.740050156	1.740050156
Mia	49.3414066	0.662349729	0.21836785	3.033183361	0.002419885	0.016885199	-1.772493827	1.772493827
Gm1661	22.93942547	0.658775848	0.242316799	2.71865529	0.006554788	0.036747725	-1.434769538	1.434769538
Ago2	3069.853228	0.658473632	0.154155327	4.271494498	1.94E-05	0.00031709	-3.49881762	3.49881762
Sybu	6112.534789	0.657885961	0.122238092	5.38200451	7.37E-08	2.32E-06	-5.635210368	5.635210368
Plin3	27.9976148	0.656940087	0.243237825	2.700813848	0.006917004	0.038099114	-1.41908512	1.41908512
2310010J17Rik	46.03994662	0.656380983	0.196946321	3.332791287	0.000859794	0.0074722	-2.126551529	2.126551529
Creg2	2579.585672	0.656379503	0.129907446	5.052670364	4.36E-07	1.13E-05	-4.948467169	4.948467169
Qpct	1136.901662	0.655540261	0.158128935	4.145605992	3.39E-05	0.00050556	-3.296227339	3.296227339
Bcor	1118.723043	0.655084589	0.161379828	4.059271828	4.92E-05	0.000688104	-3.162345754	3.162345754
Ccdc96	35.81970298	0.654909355	0.242744363	2.697938466	0.006977034	0.038388462	-1.41579929	1.41579929
Inpp5f	16393.55821	0.653685744	0.127048778	5.145155688	2.67E-07	7.32E-06	-5.135760985	5.135760985
Kcnd1	49.51731266	0.653085275	0.204325265	3.196302108	0.001392013	0.010921294	-1.961725886	1.961725886
Wnt9a	143.2197026	0.653011988	0.156005145	4.185836236	2.84E-05	0.000440149	-3.356400745	3.356400745
Fsip1	48.21225866	0.652539836	0.208156434	3.134853067	0.001719402	0.012815245	-1.8922731	1.8922731
Igdcc3	25.04158102	0.651768932	0.244969023	2.660617756	0.007799745	0.041971476	-1.377045761	1.377045761
Kcnk10	1407.090002	0.650719259	0.101349541	6.420544719	1.36E-10	6.95E-09	-8.158023998	8.158023998
Tmem178	779.0756522	0.650194744	0.196146153	3.314848314	0.000916929	0.007883532	-2.103279152	2.103279152
Cryl1	505.3040019	0.649809855	0.147734913	4.398485377	1.09E-05	0.000192467	-3.715642681	3.715642681
Isca1	1910.550269	0.64896965	0.250566894	2.590005566	0.009597438	0.049015979	-1.309662319	1.309662319
Radil	177.5143362	0.648699678	0.206161709	3.146557526	0.001652048	0.012432404	-1.9054449	1.9054449
Hivep3	224.1226899	0.648693633	0.226046761	2.869732042	0.004108198	0.025759758	-1.589058224	1.589058224
Sec24d	932.5527749	0.648669617	0.132525565	4.89467534	9.85E-07	2.27E-05	-4.643688518	4.643688518
Adcy5	2714.473925	0.647967379	0.114234637	5.672249669	1.41E-08	5.11E-07	-6.291842198	6.291842198
Cit	547.2019181	0.647771598	0.161866719	4.001882553	6.28E-05	0.000843433	-3.073949468	3.073949468
H3f3b	6978.798592	0.645609475	0.20547964	3.141963232	0.001678191	0.012577867	-1.900392997	1.900392997
Prr18	107.8062815	0.645436474	0.172918899	3.732596476	0.000189516	0.002136294	-2.670338981	2.670338981
1700030J22Rik	157.2917446	0.644957525	0.166161255	3.881515739	0.000103807	0.00128984	-2.889464223	2.889464223
Frmpd1	36.05786131	0.644633241	0.235789094	2.733940022	0.006258144	0.035499482	-1.44977798	1.44977798
Irs1	2005.838806	0.644291583	0.152551265	4.223443075	2.41E-05	0.000381837	-3.418122541	3.418122541
Cth	208.1176792	0.644071534	0.212485676	3.031129191	0.00243641	0.016972449	-1.770255499	1.770255499
Pde10a	4602.730899	0.643964625	0.129562263	4.970310107	6.68E-07	1.62E-05	-4.790007672	4.790007672
Fam69a	892.1034567	0.643590061	0.089477722	7.1927408	6.35E-13	4.99E-11	-10.30184577	10.30184577
Vangl2	201.112875	0.643230054	0.171472341	3.751217543	0.000175978	0.002005103	-2.697863222	2.697863222
Rassf2	365.439998	0.642538932	0.194827374	3.297991024	0.000973792	0.008290935	-2.081396515	2.081396515
Ank2	23919.93159	0.641991303	0.160651064	3.996184578	6.44E-05	0.000857915	-3.066555854	3.066555854
2410018L13Rik	72.40848094	0.641838001	0.203617974	3.152167695	0.001620632	0.012266242	-1.911288456	1.911288456
Soga3	3344.038592	0.641530975	0.124540952	5.151164866	2.59E-07	7.14E-06	-5.146137059	5.146137059
St6gal1	401.3655185	0.640744358	0.151026271	4.242601983	2.21E-05	0.000354643	-3.450208543	3.450208543
Otogl	208.6078152	0.64036497	0.192759758	3.322088475	0.000893464	0.007716529	-2.11257801	2.11257801
Fam179a	22.59495557	0.640296784	0.240279445	2.664800489	0.007703401	0.041618482	-1.380713768	1.380713768
Slit1	1040.032919	0.639442454	0.146229673	4.372863881	1.23E-05	0.000213914	-3.669761804	3.669761804
Cdyl2	536.5783865	0.63926393	0.126097919	5.069583508	3.99E-07	1.04E-05	-4.98408564	4.98408564
Skil	4335.469042	0.637892049	0.129055355	4.942778623	7.70E-07	1.83E-05	-4.737492005	4.737492005
Ddah2	1272.770919	0.637238637	0.169029107	3.769993509	0.000163252	0.001880402	-2.725749226	2.725749226
Nr2f1	2812.743487	0.637183374	0.132066985	4.824698434	1.40E-06	3.14E-05	-4.503624893	4.503624893
Pamr1	116.5125121	0.637179213	0.196999978	3.23441261	0.001218932	0.009833441	-2.00729448	2.00729448
Igsf3	2805.512508	0.637144471	0.140872812	4.522834899	6.10E-06	0.000116421	-3.933966812	3.933966812
P2rx5	39.55658819	0.636876808	0.24169452	2.635048606	0.008412524	0.044350257	-1.35310386	1.35310386
Prdm5	100.0533136	0.636846775	0.182990291	3.480221672	0.000500999	0.00476076	-2.322323721	2.322323721
Gm15800	5624.886372	0.63626401	0.169734742	3.748578538	0.00017784	0.002023585	-2.693878523	2.693878523
Slc43a2	1272.744096	0.636241066	0.129604836	4.909084303	9.15E-07	2.13E-05	-4.6713776	4.6713776
Impg2	65.55824775	0.635854302	0.229278526	2.773283278	0.005549379	0.032268187	-1.49122544	1.49122544
Iah1	330.5441328	0.635382682	0.20212175	3.143564123	0.001669038	0.012531518	-1.901996332	1.901996332
Celsr2	1995.195644	0.633210249	0.200361211	3.160343487	0.001575832	0.011991666	-1.921120483	1.921120483
Hibadh	777.448146	0.632992676	0.118709044	5.332303699	9.70E-08	2.94E-06	-5.531670522	5.531670522
Synpr	2198.683566	0.63243159	0.186036572	3.399501412	0.000675088	0.006151938	-2.210988045	2.210988045
Gamt	104.721516	0.630684429	0.185164313	3.406079808	0.000659029	0.006034905	-2.219329532	2.219329532
Tiam2	1284.091254	0.629761265	0.139756891	4.506119588	6.60E-06	0.000124568	-3.904595163	3.904595163
Pmepa1	245.2387438	0.629158919	0.196413151	3.203242328	0.001358896	0.010717569	-1.969903714	1.969903714
Josd2	170.1014621	0.628739308	0.225645199	2.786406755	0.005329595	0.031379198	-1.503358163	1.503358163
Tnrc6a	1348.599791	0.628336124	0.125562661	5.004163801	5.61E-07	1.39E-05	-4.857892075	4.857892075
Ablim3	1551.456091	0.62757578	0.116884588	5.369191893	7.91E-08	2.44E-06	-5.611848936	5.611848936
Flrt1	408.5681125	0.626970676	0.206533084	3.035691245	0.00239985	0.016787019	-1.775026428	1.775026428
Rwdd2a	613.2651902	0.626225437	0.122619377	5.107067497	3.27E-07	8.77E-06	-5.057004588	5.057004588
Pcdhac2	1765.226247	0.625512134	0.154356255	4.052392523	5.07E-05	0.000705158	-3.151713794	3.151713794
Asl	421.6850651	0.624735786	0.13532085	4.616700151	3.90E-06	7.78E-05	-4.108901505	4.108901505
Prepl	3892.920012	0.62468303	0.15181338	4.114808795	3.88E-05	0.000561178	-3.250899508	3.250899508
Irf1	73.8494484	0.624275402	0.222604473	2.804415356	0.005040792	0.030160647	-1.52055934	1.52055934
Tle2	234.6644479	0.623438256	0.162083435	3.84640328	0.000119864	0.001458235	-2.836172409	2.836172409
Dclk3	304.497884	0.62299755	0.191271913	3.257130339	0.001125447	0.009261357	-2.033325361	2.033325361
Draxin	321.3403028	0.622822958	0.188310405	3.307427217	0.000941572	0.008042175	-2.09462646	2.09462646
Enkur	96.7551864	0.620655588	0.209248639	2.96611529	0.003015874	0.020138616	-1.695970381	1.695970381
H2-K1	260.5331384	0.619512143	0.16403166	3.776783956	0.000158866	0.001842545	-2.734581931	2.734581931
Rsph9	636.4240737	0.619392508	0.110239681	5.618598501	1.93E-08	6.82E-07	-6.166532361	6.166532361
Prox1	345.0830219	0.61935921	0.226375583	2.735980626	0.006219469	0.035384754	-1.451183821	1.451183821
Idnk	556.093219	0.619001759	0.138590558	4.466406415	7.95E-06	0.000147118	-3.832334195	3.832334195
Nynrin	469.9370768	0.618468295	0.164078867	3.76933548	0.000163683	0.001884081	-2.724900393	2.724900393
1110015O18Rik	133.0442401	0.61612977	0.225988967	2.726371024	0.006403497	0.036091274	-1.442597793	1.442597793
Tubb3	37503.62516	0.616011703	0.1265451	4.867922216	1.13E-06	2.57E-05	-4.590653889	4.590653889
Pik3ip1	493.1440298	0.615995197	0.167138477	3.685537934	0.00022822	0.002489486	-2.60389031	2.60389031
Nedd4l	2659.744488	0.61578348	0.139348045	4.419032062	9.91E-06	0.000178862	-3.74748289	3.74748289
Slc6a11	1423.169284	0.615625198	0.181443478	3.392930983	0.000691491	0.006281511	-2.201935847	2.201935847
Klf12	1025.223296	0.61559607	0.121966511	5.047254887	4.48E-07	1.15E-05	-4.939949259	4.939949259
Parp8	1731.964347	0.614174043	0.101901104	6.027157873	1.67E-09	7.15E-08	-7.145596404	7.145596404
Ly6e	1137.470984	0.613568189	0.158137522	3.879965872	0.000104471	0.001295227	-2.887654063	2.887654063
Gm9776	47.37653938	0.613444034	0.222496867	2.757090663	0.005831818	0.033571293	-1.47403193	1.47403193
Sncb	866.9440489	0.613009174	0.220818382	2.776078557	0.005501891	0.032061926	-1.494010397	1.494010397
Tuba1b	15364.92687	0.611967308	0.208952381	2.928740536	0.003403384	0.02223193	-1.653022824	1.653022824
Dpysl5	9709.660443	0.611790933	0.186313473	3.283664484	0.001024668	0.008616807	-2.064653618	2.064653618
Plcd3	179.549108	0.611658547	0.172199983	3.552024428	0.000382279	0.003803871	-2.419774198	2.419774198
Gadd45b	875.5241871	0.611523956	0.165688176	3.690812283	0.000223539	0.002446326	-2.611485711	2.611485711
Tnik	6226.675599	0.611471996	0.132935823	4.599753333	4.23E-06	8.35E-05	-4.078107683	4.078107683
Islr	35.56103485	0.610408622	0.222324655	2.745573234	0.006040528	0.034493132	-1.46226737	1.46226737
Tspan7	10126.361	0.610362251	0.182277089	3.3485407	0.000812383	0.007170887	-2.144427104	2.144427104
Fam155a	1616.377988	0.60978465	0.119798827	5.090071964	3.58E-07	9.46E-06	-5.024178823	5.024178823
Tmem104	82.3428568	0.609279162	0.18543403	3.285692282	0.001017321	0.008576203	-2.066704945	2.066704945
Ryr1	88.96526113	0.608237685	0.183532511	3.314059625	0.000919519	0.00790178	-2.102275077	2.102275077
Chn2	702.1887276	0.608036053	0.16592825	3.664451668	0.000247869	0.002652419	-2.576357931	2.576357931
Pdk2	247.6255108	0.608018798	0.201110388	3.023308767	0.00250027	0.017288926	-1.762231973	1.762231973
Mettl7a1	214.5198783	0.607778664	0.121596357	4.998329538	5.78E-07	1.43E-05	-4.846017384	4.846017384
Nhlh2	59.41968235	0.607346424	0.219869052	2.762309735	0.0057394	0.033167526	-1.479286916	1.479286916
Atg9b	89.64750308	0.607251723	0.199851425	3.038515846	0.002377466	0.016671882	-1.778015381	1.778015381
Osbpl5	918.5352662	0.606721302	0.112673624	5.384767812	7.25E-08	2.29E-06	-5.640260073	5.640260073
Aip	574.4016227	0.606052915	0.143212028	4.231857644	2.32E-05	0.000369561	-3.432313658	3.432313658
Agap1	6295.499483	0.605782447	0.121888098	4.969988527	6.70E-07	1.62E-05	-4.789910893	4.789910893
Caly	3954.893606	0.605654846	0.186922213	3.240143773	0.001194694	0.009680235	-2.014114085	2.014114085
Crlf1	216.441067	0.605400496	0.176523797	3.429568746	0.000604541	0.005604162	-2.251489286	2.251489286
Arap1	60.93404011	0.60538571	0.214585056	2.821192312	0.004784551	0.028936938	-1.538547434	1.538547434
Cdkn1b	2961.810221	0.604818945	0.124540732	4.85639467	1.20E-06	2.70E-05	-4.568853122	4.568853122
Gopc	1379.403165	0.60470957	0.214434192	2.820024008	0.004802006	0.028996938	-1.537647857	1.537647857
Cacnb3	3651.463013	0.604591885	0.153578416	3.936698269	8.26E-05	0.001060431	-2.97451767	2.97451767
Foxp4	257.2606855	0.603280837	0.200015032	3.016177494	0.002559834	0.017599899	-1.75448983	1.75448983
Diap1	615.0016188	0.603244087	0.144024066	4.188495049	2.81E-05	0.000435824	-3.360688867	3.360688867
Ccdc74a	207.6622784	0.601886419	0.156895433	3.836226516	0.000124939	0.001510181	-2.820970967	2.820970967
Nup107	442.9795153	0.601553775	0.170138575	3.53566953	0.000406743	0.004007156	-2.397163765	2.397163765
Pianp	277.1168231	0.601460371	0.195575982	3.075328401	0.002102709	0.015119467	-1.820463514	1.820463514
Cgn	118.1371556	0.601425747	0.163757915	3.672651482	0.000240047	0.002589721	-2.586747093	2.586747093
Gstm4	64.1744768	0.601209984	0.188550296	3.188592101	0.001429675	0.011130237	-1.953495572	1.953495572
Dst	15700.58934	0.600875099	0.145070074	4.141964528	3.44E-05	0.000512298	-3.29047705	3.29047705
Bhlhe41	158.4631245	0.600321479	0.153539074	3.90989383	9.23E-05	0.001168814	-2.932254711	2.932254711
Fbxo2	341.1720328	0.598770016	0.138958729	4.30897736	1.64E-05	0.000274751	-3.561060361	3.561060361
Cacna2d1	15527.53173	0.598540049	0.14479314	4.133759712	3.57E-05	0.00052908	-3.276478873	3.276478873
Psd2	1479.110849	0.59818367	0.110732462	5.402062403	6.59E-08	2.10E-06	-5.678001941	5.678001941
Cep112	176.458357	0.597953702	0.162855156	3.671690338	0.000240952	0.002590886	-2.586551672	2.586551672
Zeb2	8216.6773	0.597811979	0.138440872	4.318175493	1.57E-05	0.000265594	-3.575782427	3.575782427
Pou3f3	1982.243563	0.597666052	0.116385451	5.135229927	2.82E-07	7.69E-06	-5.114223972	5.114223972
Rps4l	253.4993364	0.596890612	0.220000087	2.713138071	0.006664933	0.037151027	-1.430029177	1.430029177
Kcnj12	138.3838829	0.59609528	0.179548828	3.319961963	0.000900297	0.007756335	-2.110343417	2.110343417
Ptpro	3556.023867	0.596021049	0.156346923	3.812169996	0.000137752	0.001641554	-2.784744902	2.784744902
Vangl1	122.9540262	0.595549905	0.217108199	2.743101865	0.00608618	0.034708287	-1.459566814	1.459566814
Wdr83	170.990785	0.595167363	0.153121341	3.886900158	0.000101532	0.001266232	-2.897486842	2.897486842
Zbtb18	19857.2215	0.594474333	0.147678906	4.025451893	5.69E-05	0.000775638	-3.110341137	3.110341137
Chd5	2929.303045	0.594184638	0.162947276	3.646484024	0.000265853	0.002818075	-2.550047427	2.550047427
Gatsl2	654.7401348	0.593278158	0.175381396	3.382788428	0.000717539	0.006475875	-2.188701569	2.188701569
Lancl2	7579.015931	0.593216173	0.087450224	6.783472328	1.17E-11	7.36E-10	-9.132848724	9.132848724
H2-DMa	614.5995063	0.592500282	0.16244063	3.647488202	0.000264816	0.002808851	-2.551471291	2.551471291
Lrrtm1	2247.906472	0.592385187	0.217433064	2.724448504	0.006440897	0.036253664	-1.44064809	1.44064809
Ablim1	2683.598619	0.592314726	0.127478467	4.646390391	3.38E-06	6.84E-05	-4.164988002	4.164988002
Dpcd	681.4921997	0.590781903	0.156245921	3.781102899	0.000156135	0.001819035	-2.740158874	2.740158874
Gm166	140.9911426	0.590041886	0.151026568	3.906874747	9.35E-05	0.00117997	-2.92812892	2.92812892
Mlf1	324.4047082	0.589522002	0.17764143	3.318606488	0.000904678	0.007790105	-2.10845668	2.10845668
Rnf150	1746.936814	0.5894664	0.14294739	4.123659752	3.73E-05	0.000546596	-3.262333755	3.262333755
Unc5a	591.9711106	0.588792684	0.222401309	2.647433536	0.00811053	0.043271536	-1.363797689	1.363797689
Bcl2	881.9151328	0.588664265	0.179490058	3.279648302	0.001039366	0.008697646	-2.060598283	2.060598283
Ltbp4	166.7143261	0.5884864	0.202020259	2.913006854	0.003579667	0.023177249	-1.63493812	1.63493812
Rrm2	125.1362349	0.588474305	0.190640147	3.086833036	0.002023012	0.01464234	-1.834389515	1.834389515
Rbfox1	4002.830614	0.587397604	0.133123219	4.412435417	1.02E-05	0.000182259	-3.739311578	3.739311578
Mki67	174.3508183	0.586017153	0.214804383	2.728143366	0.006369192	0.035933904	-1.444495593	1.444495593
Parp12	120.020383	0.58599587	0.195168569	3.002511479	0.002677619	0.018246275	-1.738825777	1.738825777
Cenpj	84.2548616	0.584438269	0.197762824	2.955248407	0.003124174	0.02073695	-1.683255116	1.683255116
Arhgap6	76.64373939	0.583772635	0.201656524	2.894885936	0.003792963	0.024224504	-1.615745109	1.615745109
Popdc3	542.5760243	0.58296643	0.173819169	3.353867317	0.000796906	0.007067515	-2.15073325	2.15073325
Peg3	9543.803722	0.580846334	0.132221189	4.392989794	1.12E-05	0.000196043	-3.707648461	3.707648461
Pcbd2	122.3638248	0.580430362	0.14704571	3.947278438	7.90E-05	0.001023579	-2.989878543	2.989878543
Atp8a2	1344.585299	0.58008517	0.145206281	3.994904129	6.47E-05	0.000861884	-3.064551029	3.064551029
Trak1	3725.166532	0.580048352	0.141026391	4.113048254	3.90E-05	0.000564522	-3.248319279	3.248319279
Gpi1	7906.033431	0.578956407	0.178997132	3.234445155	0.001218793	0.009833441	-2.00729448	2.00729448
Tmem229a	502.6971331	0.577550523	0.14341772	4.027051363	5.65E-05	0.000772879	-3.111888321	3.111888321
Pcdh8	5389.521597	0.577095987	0.195323356	2.954567237	0.003131079	0.020770664	-1.68254962	1.68254962
Zfand4	91.27519115	0.576612509	0.17428822	3.308384871	0.000938358	0.008026903	-2.095452001	2.095452001
Gpd2	3151.972603	0.576605726	0.132092213	4.365175749	1.27E-05	0.000220666	-3.65626535	3.65626535
Gm19345	97.20713109	0.576580059	0.184204062	3.130115872	0.001747374	0.012991755	-1.886332188	1.886332188
Cbx2	67.34426865	0.576207955	0.21481895	2.682295738	0.007311879	0.039925276	-1.398752075	1.398752075
Mcur1	335.5133053	0.575290757	0.154581809	3.721594161	0.000197969	0.002212379	-2.655140451	2.655140451
Btd	201.7941009	0.574699131	0.135451631	4.242836553	2.21E-05	0.00035461	-3.450249617	3.450249617
Prph	261.1164119	0.574114949	0.205793278	2.789765316	0.005274626	0.031153317	-1.506495701	1.506495701
Me1	1618.041731	0.573900871	0.136486147	4.204828707	2.61E-05	0.000409654	-3.387582818	3.387582818
Slc30a10	316.168104	0.57360321	0.196965039	2.912208247	0.003588833	0.023201007	-1.634493156	1.634493156
Plcg2	41.72386971	0.573591105	0.208031922	2.757226391	0.005829398	0.033571293	-1.47403193	1.47403193
Coro2b	821.8784955	0.572966084	0.174667276	3.280328722	0.001036862	0.008684748	-2.061242784	2.061242784
Uchl1	26932.01165	0.572831925	0.085565855	6.694632149	2.16E-11	1.27E-09	-8.895469653	8.895469653
Rpp25l	389.5643397	0.572462507	0.129450168	4.422261606	9.77E-06	0.000176585	-3.753045154	3.753045154
Dap	128.9951116	0.572045138	0.146403735	3.907312475	9.33E-05	0.001178716	-2.928590689	2.928590689
Pitpnm2	1666.746485	0.571901296	0.173761486	3.291300681	0.000997253	0.00845203	-2.073038981	2.073038981
Vmn2r29	137.4120673	0.570921345	0.156050191	3.658575114	0.000253621	0.002703694	-2.568042478	2.568042478
3632451O06Rik	986.3826969	0.568479328	0.14038572	4.049409926	5.13E-05	0.00071303	-3.146892259	3.146892259
Tube1	100.0213825	0.567974715	0.170920766	3.323029306	0.000890456	0.007699878	-2.113516159	2.113516159
Ufsp1	72.26944604	0.567860711	0.209313693	2.712964939	0.006668416	0.037151027	-1.430029177	1.430029177
Nhsl1	338.1273097	0.567765826	0.149025943	3.809845545	0.000139054	0.001655895	-2.780967097	2.780967097
Atp9a	18774.10291	0.566201665	0.102632044	5.516811723	3.45E-08	1.15E-06	-5.940259959	5.940259959
Lrrn2	603.8097082	0.565479498	0.177193977	3.191302029	0.001416331	0.011056945	-1.95636486	1.95636486
Hist3h2a	2252.470549	0.565265122	0.191358701	2.953955678	0.003137291	0.020799485	-1.681947412	1.681947412
Inf2	60.50731651	0.56499851	0.181698719	3.109534908	0.001873821	0.013733224	-1.862227493	1.862227493
Akap5	1674.451153	0.564086624	0.149786478	3.765938231	0.000165925	0.001905991	-2.719879213	2.719879213
Pigv	220.9052562	0.563735268	0.118004872	4.77722029	1.78E-06	3.87E-05	-4.412561907	4.412561907
Frat2	359.3607326	0.563405561	0.168318241	3.347263832	0.000816135	0.007196478	-2.142880014	2.142880014
Slc12a4	128.5374354	0.563074034	0.161537978	3.485706837	0.000490839	0.004680483	-2.329709311	2.329709311
Lyrm9	1614.014071	0.562735538	0.122064885	4.610134488	4.02E-06	7.99E-05	-4.097224926	4.097224926
Gm2061	84.2855022	0.562193423	0.178681293	3.14634741	0.001653235	0.012434978	-1.905354963	1.905354963
Lrrc55	581.2435697	0.561576787	0.147627682	3.804007357	0.000142374	0.001690666	-2.771942281	2.771942281
Slco5a1	635.2432097	0.5608667	0.178810515	3.136653904	0.001708877	0.012756897	-1.894254958	1.894254958
Gab1	143.7970039	0.560628547	0.180736082	3.101918228	0.001922711	0.014036702	-1.852734923	1.852734923
Snca	10541.57398	0.560569107	0.133038674	4.213580083	2.51E-05	0.000397413	-3.400757962	3.400757962
Traf3	2327.202467	0.560459421	0.20936912	2.676896291	0.007430763	0.040463034	-1.39294156	1.39294156
Gpr153	211.2775187	0.560320251	0.196544158	2.85086189	0.00436009	0.026968676	-1.569140377	1.569140377
Fam214a	1136.792194	0.559732283	0.109399323	5.116414524	3.11E-07	8.39E-06	-5.076424515	5.076424515
Tmem130	5693.363286	0.55934066	0.12669613	4.414820388	1.01E-05	0.00018141	-3.741337926	3.741337926
Neurl1a	1646.475588	0.558746083	0.134604789	4.151011898	3.31E-05	0.000498609	-3.302239607	3.302239607
C2cd4c	220.9812432	0.558707155	0.166391601	3.357784593	0.000785698	0.006998857	-2.154972864	2.154972864
Rem2	334.1998021	0.558419571	0.158771706	3.517122708	0.000436252	0.004258123	-2.370781832	2.370781832
Rtbdn	114.8677416	0.557768544	0.156601345	3.561709796	0.000368448	0.003696735	-2.432181695	2.432181695
Flywch2	330.9253506	0.557559175	0.194330111	2.869134243	0.004115971	0.025798275	-1.588409338	1.588409338
Emx2	67.73859029	0.556419636	0.201907862	2.755809662	0.005854706	0.033661069	-1.472872101	1.472872101
Pbx1	4182.66592	0.55626416	0.193908505	2.868693983	0.004121704	0.025806114	-1.588277397	1.588277397
Slc8a3	1104.668879	0.556261268	0.115246049	4.826727448	1.39E-06	3.11E-05	-4.507471172	4.507471172
Rnf32	410.6692515	0.556200983	0.134109308	4.147370461	3.36E-05	0.000503014	-3.298420093	3.298420093
Slc22a15	179.9281506	0.556068264	0.14559714	3.819225176	0.000133872	0.001599826	-2.795927193	2.795927193
Arl10	984.5123707	0.555966553	0.133300071	4.170789621	3.04E-05	0.000463862	-3.33361098	3.33361098
Neurod2	957.2572661	0.554658705	0.156065019	3.554023243	0.000379386	0.003783914	-2.422058785	2.422058785
Fxyd6	12594.3297	0.554407902	0.09294224	5.965080064	2.45E-09	1.02E-07	-6.991624299	6.991624299
8430427H17Rik	1388.261183	0.554270426	0.167398231	3.311088915	0.000929337	0.007978028	-2.098104467	2.098104467
Rbms1	409.9909197	0.553915355	0.169891138	3.260413467	0.001112499	0.009190636	-2.036654447	2.036654447
Kcnj11	163.9754918	0.553147129	0.186909451	2.959439055	0.003081997	0.020521528	-1.687790315	1.687790315
Bcl11a	1006.053964	0.553041112	0.155801237	3.549658027	0.000385732	0.003831452	-2.416636609	2.416636609
St8sia1	1004.6751	0.552937519	0.139796131	3.95531345	7.64E-05	0.000996657	-3.001454287	3.001454287
Rab36	409.7542318	0.552089236	0.134846923	4.094192315	4.24E-05	0.000609858	-3.214771628	3.214771628
Faah	535.3088672	0.552082737	0.195658931	2.821658765	0.004777598	0.02890524	-1.539023423	1.539023423
Prpsap1	533.1991195	0.551457655	0.18017898	3.06061037	0.002208863	0.015731281	-1.803235925	1.803235925
Ccng2	2089.404129	0.55115759	0.131382916	4.195047631	2.73E-05	0.000425762	-3.370833421	3.370833421
A230056J06Rik	49.18371913	0.550630277	0.197359538	2.789985642	0.005271038	0.031153317	-1.506495701	1.506495701
Frrs1l	4124.406769	0.550377063	0.123547387	4.454785146	8.40E-06	0.000154135	-3.812099393	3.812099393
Ntn3	103.6695063	0.549939033	0.171481806	3.206981808	0.001341355	0.010613815	-1.974128483	1.974128483
Garnl3	1550.792503	0.549721486	0.131338308	4.185538049	2.84E-05	0.000440323	-3.356228813	3.356228813
Klhl36	125.8675991	0.547800677	0.162429661	3.372540918	0.00074478	0.00669243	-2.174416163	2.174416163
Gm5468	245.8435267	0.546956477	0.163145807	3.352562274	0.000800672	0.007089528	-2.149382702	2.149382702
Dtd2	282.2332408	0.546676444	0.115787511	4.721376588	2.34E-06	4.96E-05	-4.304244982	4.304244982
Hk1	3186.174285	0.546179822	0.156776953	3.483801748	0.000494346	0.004705478	-2.327396227	2.327396227
2010107G23Rik	1063.578753	0.545662414	0.109321553	4.991352548	6.00E-07	1.47E-05	-4.832739649	4.832739649
Lcmt2	199.4606707	0.545607905	0.194051104	2.811671229	0.004928485	0.029648165	-1.528002182	1.528002182
Hipk2	326.688983	0.54559196	0.164260085	3.321512698	0.000895309	0.007725186	-2.112091049	2.112091049
Zfp385a	139.7866025	0.545542804	0.187613812	2.907796601	0.00363985	0.023441078	-1.630022423	1.630022423
Btbd17	73.70578852	0.544942961	0.206022641	2.645063463	0.00816756	0.043460066	-1.361909623	1.361909623
Zfp414	237.1652042	0.54457329	0.205803447	2.646084391	0.00814295	0.043403362	-1.362476626	1.362476626
Kcna6	2692.533624	0.543265111	0.163537119	3.321968205	0.000893849	0.007716529	-2.11257801	2.11257801
Mpst	486.2602335	0.543054213	0.176396809	3.078594306	0.002079797	0.014982701	-1.824409892	1.824409892
Ccpg1	2068.706368	0.542591175	0.118479771	4.579610254	4.66E-06	9.14E-05	-4.039236629	4.039236629
Podxl	485.9015244	0.542164849	0.193317757	2.804526904	0.005039048	0.030160647	-1.52055934	1.52055934
Eif4e3	380.3446372	0.541693414	0.111266135	4.868448213	1.12E-06	2.56E-05	-4.591223878	4.591223878
0610009L18Rik	79.58364402	0.541479713	0.170559305	3.174729834	0.001499761	0.011563908	-1.93689537	1.93689537
Atp1b2	720.5836596	0.540765016	0.206496328	2.618763359	0.008824914	0.045964683	-1.337575731	1.337575731
Foxj2	497.4334595	0.540612695	0.186702286	2.895586908	0.003784502	0.024188155	-1.616397266	1.616397266
Dchs1	1893.035806	0.540542649	0.171225865	3.15689835	0.001594569	0.012112414	-1.9167693	1.9167693
Nicn1	2398.130199	0.539846714	0.191789958	2.814780913	0.00488105	0.029415205	-1.531428114	1.531428114
Etfb	235.9417724	0.539446539	0.134864559	3.999913272	6.34E-05	0.000847855	-3.071678325	3.071678325
Katnal2	126.7542799	0.539048936	0.149391181	3.608304929	0.000308204	0.003183426	-2.497105233	2.497105233
Slc36a4	992.7726366	0.53818136	0.12575156	4.279719164	1.87E-05	0.000307979	-3.511478812	3.511478812
N4bp2	778.9935121	0.537837875	0.136765226	3.932563052	8.40E-05	0.001074745	-2.968694638	2.968694638
Scrn1	5843.520372	0.537833788	0.092495528	5.814700439	6.07E-09	2.37E-07	-6.625467996	6.625467996
Aldh7a1	846.1647512	0.53707572	0.130220562	4.124354195	3.72E-05	0.000545678	-3.263063172	3.263063172
Bend3	184.7703342	0.535789199	0.167243755	3.203642482	0.001357009	0.010713799	-1.970056486	1.970056486
Fra10ac1	167.9463361	0.535655018	0.161109984	3.324778535	0.000884888	0.007662676	-2.115619547	2.115619547
Fbxo10	1300.201906	0.535623151	0.121670552	4.402241497	1.07E-05	0.000189863	-3.721560135	3.721560135
Nek6	1705.770929	0.534800025	0.108687532	4.920527842	8.63E-07	2.02E-05	-4.694341725	4.694341725
Crtc3	210.7840915	0.534604307	0.13371826	3.997990306	6.39E-05	0.000852744	-3.069181383	3.069181383
Pigo	292.6780444	0.534414228	0.141499179	3.776800906	0.000158856	0.001842545	-2.734581931	2.734581931
Asap2	539.3493313	0.534055873	0.170326998	3.135474003	0.001715766	0.01279701	-1.892891491	1.892891491
Podxl2	7112.530829	0.533376804	0.10389916	5.133600738	2.84E-07	7.73E-06	-5.111863161	5.111863161
Amotl2	530.7888321	0.533357768	0.165616112	3.220446142	0.001279912	0.010228457	-1.990189864	1.990189864
Rhob	3362.553254	0.531438912	0.115491229	4.601552131	4.19E-06	8.29E-05	-4.081350122	4.081350122
Acot8	261.0993607	0.530998096	0.159072453	3.338089565	0.000843566	0.00738517	-2.131639475	2.131639475
Serinc5	1114.021907	0.530784793	0.172749181	3.072574869	0.002122206	0.015242692	-1.816938327	1.816938327
Syt3	655.0100632	0.530352388	0.169567779	3.127671951	0.001761967	0.013055102	-1.884219719	1.884219719
Smyd3	867.7728679	0.530348429	0.118056347	4.492333046	7.04E-06	0.000131881	-3.879816383	3.879816383
Adi1	245.1308293	0.53020814	0.197109151	2.689921492	0.007146883	0.039182554	-1.406907257	1.406907257
Jakmip3	654.6673933	0.529862366	0.094949405	5.580470635	2.40E-08	8.35E-07	-6.078241467	6.078241467
Mast4	1010.283897	0.529817035	0.166482133	3.182425799	0.001460469	0.011333403	-1.945639666	1.945639666
Slitrk2	2522.421164	0.529447781	0.152960236	3.461342604	0.000537488	0.005070407	-2.29495722	2.29495722
Slc31a2	201.3606831	0.528699778	0.139676625	3.785170062	0.000153604	0.001799964	-2.744736079	2.744736079
Mavs	116.3604711	0.528565808	0.158808249	3.328327154	0.000873692	0.007577382	-2.120480801	2.120480801
Sgsm2	1363.397004	0.528406134	0.152778115	3.458650699	0.000542888	0.00511849	-2.290858182	2.290858182
Odc1	5600.597951	0.528266852	0.147685219	3.576978498	0.000347589	0.003516707	-2.453863836	2.453863836
Adam23	2922.180147	0.527926757	0.130131283	4.056878122	4.97E-05	0.000694617	-3.158254708	3.158254708
Mycl	1397.121593	0.527813596	0.156638004	3.369639442	0.000752666	0.006753198	-2.170490546	2.170490546
Lamb1	824.3205255	0.527455189	0.165393287	3.189096712	0.001427181	0.011115951	-1.954053371	1.954053371
Nav2	870.6484915	0.527379588	0.157002878	3.359044073	0.000782126	0.006973061	-2.156576508	2.156576508
Hbq1b	81.63799625	0.527125507	0.192783456	2.734288087	0.006251532	0.035483486	-1.449973717	1.449973717
Phf2	371.9760793	0.5250055	0.182847102	2.871281498	0.004088113	0.025693832	-1.590171115	1.590171115
Myl6b	326.9484069	0.524460123	0.156721495	3.346446653	0.000818544	0.007202678	-2.142506011	2.142506011
Gnb4	1820.547812	0.524278819	0.12687279	4.132318831	3.59E-05	0.00053101	-3.274897546	3.274897546
Snn	5412.370767	0.522920169	0.11498384	4.547770983	5.42E-06	0.00010463	-3.980345088	3.980345088
Hist1h1a	382.5679988	0.522483919	0.172578196	3.027519879	0.002465695	0.017132157	-1.766187959	1.766187959
Fuz	184.7984381	0.522448763	0.141660658	3.688030048	0.000225997	0.002468425	-2.607580094	2.607580094
Eml1	1544.593665	0.522407202	0.109932617	4.752067385	2.01E-06	4.32E-05	-4.364502263	4.364502263
Dpysl2	38835.11318	0.521969158	0.135725553	3.845769238	0.000120175	0.001460959	-2.835361966	2.835361966
Igip	1123.588197	0.521271189	0.130915807	3.981728425	6.84E-05	0.000904676	-3.043506903	3.043506903
Dtx4	3361.918978	0.521101355	0.12395186	4.204062415	2.62E-05	0.000410282	-3.386917309	3.386917309
Il17d	106.6480279	0.520243447	0.172086694	3.023147424	0.002501603	0.017291066	-1.762178219	1.762178219
Ulk4	226.3730154	0.520155925	0.13865576	3.751419516	0.000175836	0.002004841	-2.697919984	2.697919984
Plcd1	120.3547831	0.520052622	0.186334697	2.790959651	0.005255202	0.031082083	-1.507489889	1.507489889
Sgcb	1309.043442	0.519940223	0.130571507	3.98203432	6.83E-05	0.00090422	-3.043725752	3.043725752
Map1b	61485.01692	0.519591754	0.185588064	2.799704591	0.005114939	0.030478019	-1.516013268	1.516013268
Cdh4	576.7686933	0.519550756	0.171204643	3.03467679	0.002407936	0.016829638	-1.773925235	1.773925235
Dnal1	1855.208619	0.518384648	0.198475354	2.611833856	0.009005801	0.046690805	-1.330768634	1.330768634
Sema4g	1039.32868	0.517966852	0.163726722	3.163606064	0.001558276	0.011911744	-1.924024661	1.924024661
Gpr21	186.6530366	0.516844863	0.172370374	2.998455309	0.00271352	0.018446252	-1.734091859	1.734091859
Zfp40	1460.747564	0.515109984	0.167959042	3.066878557	0.002163067	0.015470374	-1.810499192	1.810499192
St6gal2	1116.714113	0.514518173	0.12614794	4.078688647	4.53E-05	0.000643399	-3.191519335	3.191519335
Tubb2b	51669.68648	0.514027479	0.101845888	5.047110794	4.49E-07	1.15E-05	-4.939949259	4.939949259
Rfx1	166.9795777	0.513519764	0.169506062	3.029506774	0.002449534	0.017042782	-1.768459501	1.768459501
Farp1	1766.305416	0.513104413	0.14234361	3.604688769	0.000312527	0.003221816	-2.491899257	2.491899257
Tubb5	42394.39935	0.512158713	0.12798114	4.001829596	6.29E-05	0.000843433	-3.073949468	3.073949468
Spats2l	667.1413289	0.511642032	0.160318238	3.191415014	0.001415778	0.011056945	-1.95636486	1.95636486
Fancd2	212.9847782	0.511324781	0.158650237	3.222968898	0.001268693	0.010157968	-1.993193154	1.993193154
Wdtc1	723.5795622	0.50994114	0.146208089	3.487776514	0.000487055	0.004657084	-2.331885904	2.331885904
Elovl2	1389.646589	0.509677247	0.133911308	3.806080711	0.000141186	0.001678924	-2.774968924	2.774968924
Ninj1	234.7056498	0.507642516	0.167908626	3.023326006	0.002500128	0.017288926	-1.762231973	1.762231973
Glt1d1	208.1316788	0.50699938	0.148654639	3.410585655	0.000648235	0.005952202	-2.225322338	2.225322338
Dusp18	997.5371153	0.506762832	0.18574022	2.728341934	0.006365359	0.035930919	-1.444531675	1.444531675
Cpeb3	716.6231672	0.506378094	0.130363046	3.884368382	0.000102596	0.001277611	-2.893601408	2.893601408
Gm15706	103.8331631	0.505153468	0.15580118	3.242295524	0.00118571	0.009635178	-2.016140276	2.016140276
Cadm3	9499.122518	0.504578359	0.159528267	3.162940144	0.001561844	0.011922832	-1.923620571	1.923620571
Trim9	2375.863481	0.503278143	0.143937723	3.496499266	0.000471406	0.004527963	-2.344097173	2.344097173
Evc2	75.30968158	0.503167893	0.18921499	2.659239063	0.007831737	0.042103378	-1.375683058	1.375683058
Prdm10	322.8804889	0.502757435	0.139625021	3.600768909	0.000317277	0.003257093	-2.487169846	2.487169846
Cnih3	1994.238464	0.502474887	0.074108602	6.780250548	1.20E-11	7.45E-10	-9.12797797	9.12797797
Elfn2	1240.155324	0.502237739	0.152862266	3.285557324	0.001017808	0.008576203	-2.066704945	2.066704945
Fam210b	322.7574642	0.502167685	0.164070385	3.060684513	0.002208316	0.015731281	-1.803235925	1.803235925
Arrdc1	244.330532	0.502004364	0.131166899	3.827218368	0.0001296	0.001557593	-2.807546098	2.807546098
Snx8	1266.748032	0.501736103	0.161419904	3.108266635	0.001881882	0.013774365	-1.860928418	1.860928418
2900092D14Rik	582.6346987	0.501695033	0.132535058	3.785376038	0.000153476	0.001799723	-2.744794316	2.744794316
Dusp15	446.3757039	0.501409117	0.123118779	4.072564099	4.65E-05	0.000656498	-3.182766407	3.182766407
Tusc1	126.3804848	0.501378684	0.16738832	2.995302686	0.002741726	0.018608034	-1.730299505	1.730299505
Slc29a4	765.1034795	0.500773212	0.166529834	3.0071081	0.00263746	0.018052753	-1.743456556	1.743456556
Arhgap21	4648.774556	0.499752124	0.142126442	3.516250169	0.000437688	0.004267209	-2.369856104	2.369856104
Cxx1a	720.6089421	0.499413059	0.153685502	3.249578208	0.001155763	0.009446376	-2.024734771	2.024734771
Ids	10764.67734	0.499107366	0.173155873	2.882416617	0.003946376	0.024930228	-1.603273747	1.603273747
Atat1	1705.097941	0.498709041	0.166855331	2.988870895	0.002800104	0.018928166	-1.722891454	1.722891454
Nrip3	5466.40669	0.497853097	0.124493433	3.999031001	6.36E-05	0.000850348	-3.070403405	3.070403405
Gm16532	315.1557825	0.496466626	0.112823282	4.400391642	1.08E-05	0.000191261	-3.718374005	3.718374005
Bend7	143.9969869	0.496334038	0.190453431	2.606065086	0.009158906	0.047324749	-1.324911681	1.324911681
Sep-11	4939.334579	0.496082616	0.095034238	5.220040951	1.79E-07	5.03E-06	-5.298777229	5.298777229
Gtf3c1	2497.715788	0.494174762	0.133615906	3.698472554	0.000216901	0.00238605	-2.622320445	2.622320445
Lmo7	1852.118355	0.493608946	0.174914122	2.822007389	0.004772408	0.028897667	-1.539137215	1.539137215
Tcf4	21205.39001	0.492750245	0.149409079	3.297993982	0.000973782	0.008290935	-2.081396515	2.081396515
Zfp385b	461.9849446	0.492588556	0.127118942	3.875020876	0.000106616	0.001315055	-2.881056075	2.881056075
Prrg3	332.1577338	0.492296627	0.156456584	3.146538261	0.001652156	0.012432404	-1.9054449	1.9054449
Angel1	73.82073609	0.492105047	0.184458791	2.667831897	0.007634244	0.041344404	-1.383583264	1.383583264
Sh3yl1	395.3162425	0.491616762	0.164759044	2.983852969	0.002846435	0.019175717	-1.717248387	1.717248387
Mxi1	1532.375961	0.491536306	0.140717585	3.493069524	0.000477502	0.004573512	-2.339750176	2.339750176
Mpp2	882.3870236	0.49122331	0.15034255	3.26736051	0.001085553	0.009003269	-2.045599769	2.045599769
Rcl1	495.3024138	0.491162076	0.135038049	3.637212465	0.000275605	0.002906845	-2.536578107	2.536578107
Ehbp1l1	675.2775536	0.490816724	0.151415296	3.241526689	0.001188913	0.009651916	-2.01538647	2.01538647
Bre	765.5775592	0.490396404	0.139129384	3.524750769	0.000423881	0.004156598	-2.381262006	2.381262006
Zhx2	787.8648279	0.490156981	0.156303477	3.13593139	0.001713093	0.012782715	-1.89337689	1.89337689
Prrc2b	7076.296129	0.489984357	0.178253392	2.748808032	0.00598124	0.034237026	-1.465503966	1.465503966
Frmd4b	444.9201572	0.489314886	0.176997306	2.764532955	0.005700435	0.032998815	-1.481501655	1.481501655
Klf6	6361.66291	0.487718365	0.121230955	4.023051399	5.74E-05	0.000782325	-3.106612783	3.106612783
Sec14l3	428.1811391	0.48749427	0.15426919	3.160023519	0.001577564	0.011994033	-1.921034775	1.921034775
Mapre3	936.026113	0.487369586	0.161903966	3.010238714	0.002610424	0.017889459	-1.747402802	1.747402802
Tmem117	412.7632517	0.487201124	0.158426488	3.075250413	0.002103259	0.015119467	-1.820463514	1.820463514
Nova1	584.6698069	0.487100186	0.183107884	2.660181387	0.007809858	0.042005481	-1.376694036	1.376694036
Rbmx2	155.7295173	0.486372112	0.160030252	3.039251054	0.002371671	0.016651992	-1.778533809	1.778533809
Nudt10	1025.851634	0.48635213	0.113617152	4.28062244	1.86E-05	0.000307331	-3.512394102	3.512394102
Ptpdc1	712.9974546	0.485928323	0.117080714	4.150370351	3.32E-05	0.000499563	-3.301409431	3.301409431
Samd4	733.4666967	0.48562656	0.114839848	4.228728701	2.35E-05	0.000373679	-3.427501157	3.427501157
Vwa8	746.1873713	0.485110337	0.096458657	5.02920477	4.93E-07	1.24E-05	-4.906773456	4.906773456
Asic1	1449.611573	0.484285632	0.153549839	3.153931235	0.00161087	0.012197828	-1.913717483	1.913717483
Myo16	2579.254249	0.483694792	0.13169335	3.672886977	0.000239826	0.002589319	-2.58681447	2.58681447
Dennd4b	385.9173062	0.483681022	0.165807504	2.917123845	0.003532755	0.022935062	-1.639500081	1.639500081
Nbl1	796.7870605	0.483557151	0.167384508	2.888900277	0.003865917	0.024559769	-1.609775719	1.609775719
Pnma1	196.6030259	0.483027619	0.179199015	2.695481435	0.007028699	0.03860983	-1.413302105	1.413302105
Srgap2	4154.621929	0.482378466	0.143887793	3.352462746	0.00080096	0.007089528	-2.149382702	2.149382702
Tacc1	2814.826961	0.480822202	0.148377644	3.240529965	0.001193077	0.009671773	-2.014493894	2.014493894
Lrrc58	8742.906313	0.480298533	0.113548909	4.229882422	2.34E-05	0.000372469	-3.428909523	3.428909523
Mcf2l	9248.727993	0.48013087	0.105422893	4.554332133	5.26E-06	0.000101883	-3.991899888	3.991899888
Ankrd44	772.8619737	0.480113436	0.107568987	4.463307209	8.07E-06	0.0001491	-3.826523203	3.826523203
Ttll5	757.879905	0.479975075	0.123926725	3.873055438	0.000107479	0.001322811	-2.878502226	2.878502226
Wipf2	430.9536872	0.479708815	0.174166782	2.754307155	0.005881654	0.0337815	-1.471321069	1.471321069
Gda	12540.47651	0.479579072	0.118862427	4.034740692	5.47E-05	0.000751044	-3.124334564	3.124334564
Ank3	5986.933426	0.479119372	0.142407063	3.364435462	0.000767004	0.006855279	-2.163974895	2.163974895
Hist3h2ba	1316.348478	0.479090051	0.179187729	2.673676673	0.007502475	0.040774634	-1.389609933	1.389609933
BC029722	972.3345833	0.478619008	0.095680624	5.002256366	5.67E-07	1.40E-05	-4.854228459	4.854228459
Flot2	2078.77315	0.478502676	0.103475556	4.624306416	3.76E-06	7.52E-05	-4.123796587	4.123796587
Gpm6a	116550.1682	0.478299762	0.110541987	4.32686055	1.51E-05	0.00025746	-3.589290509	3.589290509
Lifr	1789.695423	0.478181784	0.147654432	3.238519682	0.001201517	0.009721524	-2.012265634	2.012265634
Srgap3	5921.107888	0.477867043	0.149334394	3.199979803	0.001374372	0.010824463	-1.96559364	1.96559364
Olig1	166.6022799	0.477537091	0.183798248	2.598159099	0.009372506	0.048150197	-1.317401935	1.317401935
Rtn1	31734.89986	0.476621508	0.132871759	3.587079077	0.000334403	0.003416048	-2.466475989	2.466475989
Vps13c	2418.305129	0.47526279	0.135249069	3.513981968	0.000441443	0.00429637	-2.366898278	2.366898278
Ggact	336.6726203	0.475001259	0.107629101	4.413316246	1.02E-05	0.000182004	-3.739919515	3.739919515
Trappc6b	665.647583	0.474630805	0.146676548	3.235901117	0.001212594	0.009801752	-2.008696303	2.008696303
Fam57b	361.1864186	0.473891558	0.168029738	2.820283857	0.004798119	0.028987846	-1.537784056	1.537784056
Coro2a	1053.347698	0.473703952	0.157543808	3.006807806	0.002640066	0.018063273	-1.74320355	1.74320355
Dpysl4	3405.094965	0.473507983	0.131454615	3.602064342	0.0003157	0.003247717	-2.488421765	2.488421765
Stxbp1	5855.728958	0.472872957	0.180343621	2.622066442	0.008739839	0.045676547	-1.340306739	1.340306739
Tnip1	301.8126524	0.472168826	0.143771579	3.284159702	0.001022869	0.00860759	-2.065118422	2.065118422
Lrp1	4947.816938	0.472099917	0.143267277	3.295238988	0.00098338	0.008352795	-2.078168183	2.078168183
Zcchc12	12232.92167	0.471627349	0.091585645	5.149577184	2.61E-07	7.18E-06	-5.143877426	5.143877426
Magee1	2721.610321	0.471461653	0.124401192	3.789848361	0.000150739	0.001770086	-2.752005672	2.752005672
D630023F18Rik	573.8552352	0.471132348	0.116854038	4.031802032	5.54E-05	0.000759264	-3.119607336	3.119607336
Pdlim4	166.6796645	0.470799424	0.155864901	3.020560893	0.00252307	0.017396715	-1.759532753	1.759532753
Pecr	111.2727804	0.470330444	0.166674045	2.821857734	0.004774635	0.028897667	-1.539137215	1.539137215
Kctd15	440.2000396	0.469941324	0.15803984	2.973562381	0.002943646	0.019732593	-1.704815852	1.704815852
Rnf24	754.9742372	0.469741427	0.146348885	3.20973697	0.001328565	0.010536864	-1.977288623	1.977288623
Pxylp1	200.2263001	0.469632806	0.151999969	3.089690144	0.002003654	0.014527137	-1.837819959	1.837819959
Smad7	165.92475	0.469475778	0.175867883	2.669479898	0.007596882	0.041185915	-1.385251276	1.385251276
Map3k13	755.0612109	0.469185553	0.12810183	3.662598376	0.00024967	0.002668307	-2.57376425	2.57376425
Atp6v1g2	3551.127889	0.468325177	0.102917801	4.550477888	5.35E-06	0.000103529	-3.984937177	3.984937177
Pcnx	4075.82829	0.468190054	0.144375897	3.242854694	0.001183385	0.009620918	-2.016783478	2.016783478
Slc46a1	112.9879598	0.467878618	0.165410856	2.828584707	0.004675433	0.028491287	-1.545287938	1.545287938
Acbd4	285.2344384	0.467307653	0.142162054	3.287147592	0.001012078	0.008545889	-2.068242772	2.068242772
Pfn4	138.4695403	0.467138471	0.144200497	3.239506656	0.001197367	0.009692586	-2.013560337	2.013560337
Pkia	38124.96786	0.466790462	0.104978889	4.446517456	8.73E-06	0.000159492	-3.797262404	3.797262404
Gpr56	397.8168788	0.466552283	0.180132916	2.590044583	0.00959635	0.049015979	-1.309662319	1.309662319
Slc41a3	126.8748983	0.464557118	0.162943429	2.851033143	0.004357743	0.026967294	-1.569162623	1.569162623
Ralgps1	2401.625846	0.464370979	0.131982237	3.518435431	0.000434099	0.004242016	-2.372427727	2.372427727
Trib2	3061.088827	0.463887793	0.147221319	3.150955293	0.001627374	0.012295229	-1.910263375	1.910263375
Cplx2	5324.473583	0.462927324	0.166447971	2.781213377	0.005415613	0.031752791	-1.498218089	1.498218089
L1cam	9816.382647	0.462718649	0.163322246	2.833163633	0.004608979	0.028188052	-1.549934929	1.549934929
C530008M17Rik	2469.413717	0.462451311	0.146994801	3.146038553	0.001654982	0.012437038	-1.905283043	1.905283043
Neurod6	2396.269646	0.462350494	0.137136013	3.371473949	0.000747671	0.006711948	-2.173151419	2.173151419
Kbtbd7	1495.911442	0.461909448	0.151307275	3.05279074	0.00226724	0.016079215	-1.793735151	1.793735151
Arid1b	1991.267578	0.461656076	0.121560699	3.797741221	0.000146021	0.001729106	-2.762178462	2.762178462
Jph3	1631.047262	0.461498786	0.16116984	2.863431429	0.004190795	0.026122468	-1.582985791	1.582985791
Cd99l2	5436.452351	0.460715121	0.110956201	4.15222507	3.29E-05	0.000496416	-3.304154641	3.304154641
Nisch	3498.51804	0.460204662	0.149496427	3.078365621	0.002081394	0.01498781	-1.824261812	1.824261812
Cep120	2327.246557	0.460174955	0.099365364	4.631140439	3.64E-06	7.28E-05	-4.137608729	4.137608729
Stk32c	826.7354909	0.458872574	0.128668165	3.56632564	0.000362021	0.003638747	-2.439048155	2.439048155
Ina	2804.5042	0.458826129	0.148981852	3.079745096	0.002071778	0.014955342	-1.825203645	1.825203645
Plekhm3	873.7088322	0.458591857	0.134286852	3.415016804	0.000637781	0.005872173	-2.231201127	2.231201127
Nkrf	2072.969474	0.458569929	0.094319893	4.861858027	1.16E-06	2.63E-05	-4.579395945	4.579395945
Gucy1a3	5045.9856	0.458311771	0.137596192	3.330846329	0.000865824	0.007513002	-2.124186505	2.124186505
Naglu	134.3012067	0.457678064	0.160613611	2.84955964	0.00437798	0.027059504	-1.567680168	1.567680168
Mkrn3	1027.761727	0.45695751	0.140746918	3.246660856	0.001167674	0.00952529	-2.021121794	2.021121794
Rfc2	1134.843705	0.456797845	0.090775983	5.032144294	4.85E-07	1.23E-05	-4.911486473	4.911486473
Stat3	1447.736338	0.456743867	0.146359693	3.120694346	0.001804252	0.013299	-1.876181005	1.876181005
Izumo4	354.8049044	0.456224223	0.120841905	3.775380932	0.000159763	0.001850318	-2.732753648	2.732753648
Atp6v0a1	8324.126992	0.455615242	0.166770198	2.731994367	0.006295222	0.035659549	-1.44782416	1.44782416
Epha10	560.7334807	0.455384307	0.133054843	3.422530876	0.000620411	0.005724728	-2.242245158	2.242245158
Cnnm3	254.8616668	0.454623167	0.146780231	3.097305165	0.001952887	0.014232393	-1.846722083	1.846722083
Tgfb3	246.3562823	0.454038586	0.144530526	3.141471898	0.001681009	0.012593401	-1.899856984	1.899856984
Iqsec3	1424.51683	0.454007191	0.117786055	3.854507142	0.000115963	0.001412807	-2.849917009	2.849917009
Myt1	801.00153	0.452785298	0.149817646	3.022242773	0.002509092	0.017328643	-1.761235444	1.761235444
Lrp10	519.8978688	0.452665671	0.162129663	2.791997845	0.00523837	0.030993386	-1.508730972	1.508730972
Cdkl2	3516.349215	0.452209878	0.135756231	3.331043254	0.000865212	0.007511971	-2.124246113	2.124246113
2210016F16Rik	148.2103891	0.452003026	0.170133033	2.65676229	0.007889505	0.042319626	-1.373458175	1.373458175
Frmd4a	2263.808287	0.451837555	0.146297537	3.08848367	0.002011807	0.014579992	-1.836242714	1.836242714
Rhbdd2	931.3316936	0.451705826	0.128113138	3.525835313	0.000422149	0.004142019	-2.382787916	2.382787916
Rapgef5	3070.263073	0.451529273	0.092566133	4.877910052	1.07E-06	2.46E-05	-4.609681937	4.609681937
Micu2	1190.552773	0.451250824	0.112854507	3.998518404	6.37E-05	0.000851517	-3.069806693	3.069806693
Hivep2	9128.649085	0.450765372	0.168710128	2.671833493	0.007543807	0.040946553	-1.387782654	1.387782654
Cog7	930.2932073	0.449655037	0.09918795	4.533363531	5.81E-06	0.000111647	-3.952152207	3.952152207
D130043K22Rik	791.5907356	0.449484609	0.1620568	2.773623865	0.005543573	0.032245531	-1.491530463	1.491530463
Cat	1920.883101	0.449304711	0.144256196	3.114630256	0.001841756	0.013521693	-1.868968915	1.868968915
Laptm4a	4588.598384	0.448994672	0.116864347	3.842015841	0.000122028	0.00148029	-2.829653106	2.829653106
Ier5	588.0871755	0.448977171	0.16503091	2.720564111	0.006517063	0.036621342	-1.43626575	1.43626575
Lsm11	4096.229182	0.448834955	0.112407867	3.992914094	6.53E-05	0.000867101	-3.061930315	3.061930315
Ablim2	498.6051997	0.448311613	0.157057051	2.854450714	0.004311132	0.026780183	-1.572186468	1.572186468
Ubqln2	2649.438973	0.448156165	0.145242182	3.085578587	0.002031565	0.014697948	-1.832743281	1.832743281
Ift52	893.5525928	0.447637796	0.080759278	5.542865231	2.98E-08	1.01E-06	-5.996996462	5.996996462
Dnah8	117.8924109	0.447201071	0.161441876	2.770043815	0.005604875	0.032512512	-1.487949471	1.487949471
Vat1	2061.246118	0.44712728	0.157465148	2.839531701	0.004517981	0.027762234	-1.556545584	1.556545584
Pcsk5	433.0985226	0.446917472	0.154477874	2.893084047	0.003814792	0.024326502	-1.613920331	1.613920331
Ifit2	253.1973289	0.446208218	0.165651397	2.693658035	0.007067263	0.038783818	-1.411349442	1.411349442
Hs2st1	3026.284588	0.446079385	0.12602547	3.539597061	0.000400738	0.00395492	-2.402862289	2.402862289
Mcm4	240.2652648	0.445476586	0.141170849	3.155584799	0.001601767	0.012139783	-1.915789067	1.915789067
Dpysl3	78569.39815	0.444462034	0.100717279	4.412967041	1.02E-05	0.000182004	-3.739919515	3.739919515
Slc41a2	2563.200014	0.444341021	0.105732475	4.202502797	2.64E-05	0.000412738	-3.384325969	3.384325969
Cox20	278.6069822	0.443700502	0.120423213	3.684509755	0.000229143	0.002493114	-2.603257863	2.603257863
Cyb5r3	3585.25917	0.443466909	0.100150843	4.42798978	9.51E-06	0.00017248	-3.763260886	3.763260886
Tmsb10	17486.42825	0.442960322	0.103447899	4.281965382	1.85E-05	0.00030578	-3.514591085	3.514591085
Prcp	366.7023597	0.442438771	0.13753312	3.216961629	0.001295559	0.010324122	-1.986146893	1.986146893
Marcks	10060.08728	0.44203127	0.139664668	3.164946977	0.001551112	0.011875732	-1.925339622	1.925339622
Dopey2	1114.718354	0.44107346	0.163540626	2.697026852	0.006996163	0.038468644	-1.41489312	1.41489312
Smad5	1442.309345	0.43949824	0.116543425	3.771111396	0.000162522	0.001873275	-2.72739842	2.72739842
Wdr6	13586.07157	0.439393297	0.162293699	2.707395909	0.006781333	0.037568764	-1.425173089	1.425173089
Siae	478.6962566	0.438598467	0.104714053	4.188534924	2.81E-05	0.000435824	-3.360688867	3.360688867
Slc9a6	4143.197618	0.438183455	0.138563237	3.162335579	0.001565091	0.011936823	-1.923111263	1.923111263
Mtss1	4005.737899	0.436555189	0.136680123	3.193991785	0.001403201	0.010995106	-1.958800572	1.958800572
2310003H01Rik	1525.121986	0.436089041	0.164832828	2.645644352	0.008153549	0.043446144	-1.362048767	1.362048767
2610002J02Rik	289.358271	0.435422028	0.163429281	2.664284065	0.007715238	0.041636149	-1.380529442	1.380529442
Wdr91	451.0922491	0.435417268	0.122406624	3.557138108	0.000374917	0.0037533	-2.425586672	2.425586672
Tcp11l1	466.7072373	0.434818464	0.134970296	3.221586345	0.00127483	0.010198618	-1.991458688	1.991458688
Cyb561a3	349.7819123	0.43454834	0.110043212	3.948888198	7.85E-05	0.001017501	-2.992464946	2.992464946
Lpcat1	906.7528254	0.434195386	0.104330142	4.161744435	3.16E-05	0.000479589	-3.319130546	3.319130546
Kif1b	24690.39078	0.43417811	0.124212842	3.495436552	0.000473287	0.004540866	-2.342861342	2.342861342
Tmem223	866.0652312	0.433805535	0.148502791	2.921194487	0.003486921	0.022663643	-1.644670279	1.644670279
Bcas3	514.6965186	0.433782437	0.14541173	2.983132352	0.002853146	0.019209817	-1.716476773	1.716476773
Porcn	890.4303121	0.433513484	0.105419313	4.112277652	3.92E-05	0.000565912	-3.247251311	3.247251311
Chd1l	159.6557746	0.43336916	0.142644153	3.038113737	0.002380641	0.016687215	-1.777616136	1.777616136
Scai	7922.877051	0.432651676	0.099894982	4.331065172	1.48E-05	0.000253102	-3.596704509	3.596704509
Ttyh1	1887.919927	0.432487605	0.136607649	3.165910609	0.001545983	0.011844586	-1.926480105	1.926480105
Akap6	14276.00594	0.431620528	0.130511176	3.307153766	0.000942491	0.008045961	-2.094422098	2.094422098
Matk	1671.114821	0.431420662	0.15469288	2.788885058	0.005288983	0.031221566	-1.505545314	1.505545314
Arxes2	3021.381684	0.430868322	0.114083747	3.776772165	0.000158874	0.001842545	-2.734581931	2.734581931
Gpr45	308.2155262	0.430647442	0.121564193	3.542551739	0.000396276	0.003917747	-2.406963664	2.406963664
Syt9	1082.552817	0.430008754	0.1289231	3.335389488	0.0008518	0.007429491	-2.129040918	2.129040918
Abcd1	206.2599465	0.429722915	0.14164678	3.033764096	0.002415232	0.016866671	-1.772970639	1.772970639
Ino80dos	115.5351137	0.429608449	0.161811676	2.654990419	0.007931066	0.042475098	-1.371865615	1.371865615
Stx18	469.1587366	0.429515377	0.158161858	2.715669769	0.006614186	0.03695802	-1.432291301	1.432291301
Ifngr2	3069.971436	0.429261486	0.099529531	4.312905734	1.61E-05	0.000270718	-3.567482201	3.567482201
Dnmt3a	7015.151153	0.428988436	0.113510373	3.779288395	0.000157277	0.001830256	-2.737488096	2.737488096
Ank1	637.412543	0.428536194	0.128112161	3.345007925	0.000822802	0.007228844	-2.140931159	2.140931159
Map3k1	205.6975118	0.428375808	0.16018984	2.6741759	0.007491315	0.04072709	-1.390116625	1.390116625
Coa3	1423.529376	0.427295591	0.148979904	2.868142482	0.004128895	0.025822418	-1.588003092	1.588003092
Tmem39b	113.5057464	0.427251073	0.163463945	2.613732796	0.008955905	0.046503508	-1.332514284	1.332514284
Chd6	3407.376594	0.426250976	0.115508394	3.69021646	0.000224063	0.002448889	-2.61103095	2.61103095
5330417C22Rik	390.1381923	0.425937565	0.142590184	2.987145063	0.002815961	0.019015353	-1.720895605	1.720895605
Mad2l2	361.5971869	0.424857315	0.134302469	3.163436367	0.001559184	0.011913297	-1.923968028	1.923968028
Atl1	2506.303185	0.424350296	0.102014877	4.159690327	3.19E-05	0.000482188	-3.316783458	3.316783458
Zhx1	3786.73214	0.424232806	0.14570398	2.911607543	0.003595741	0.023218999	-1.634156502	1.634156502
Map2	55630.29628	0.424073436	0.111020986	3.819759249	0.000133582	0.001597497	-2.796559992	2.796559992
Chd3	9552.863211	0.422838168	0.143220635	2.952355061	0.003153601	0.020883021	-1.680206678	1.680206678
Adcy3	943.8476108	0.422773248	0.128658316	3.28601571	0.001016153	0.008570813	-2.066978003	2.066978003
Rpp21	386.9878685	0.421666031	0.134155571	3.143112352	0.001671617	0.012539724	-1.901712022	1.901712022
Med12l	1009.349623	0.420499982	0.126438993	3.325714408	0.000881922	0.007644837	-2.116631787	2.116631787
Elavl4	5161.185384	0.420385807	0.090684893	4.635676249	3.56E-06	7.14E-05	-4.146096917	4.146096917
Gnaz	2382.178626	0.420365988	0.149829198	2.805634636	0.00502176	0.030091354	-1.521558274	1.521558274
Ube4b	2038.360707	0.419991193	0.157616445	2.664640697	0.007707062	0.041618627	-1.380712249	1.380712249
Rasgef1b	1080.320024	0.419422514	0.104815643	4.001525925	6.29E-05	0.000843433	-3.073949468	3.073949468
Erc1	5671.01811	0.419296661	0.141856328	2.955783962	0.003118755	0.020709119	-1.683838373	1.683838373
Cadm2	7956.875449	0.419248363	0.159948646	2.62114355	0.008763535	0.045776154	-1.339360701	1.339360701
Arhgdig	3633.349733	0.418098924	0.097577027	4.284809005	1.83E-05	0.000302783	-3.518868604	3.518868604
Man2c1	802.9776325	0.417903313	0.135156565	3.091994182	0.001988167	0.014439654	-1.840443211	1.840443211
Csrnp3	8263.10985	0.417899182	0.139162781	3.002952228	0.002673744	0.018227227	-1.739279401	1.739279401
Stmn2	21636.29898	0.417686374	0.117423355	3.557097924	0.000374974	0.0037533	-2.425586672	2.425586672
Rab40b	735.296379	0.417556388	0.137113183	3.04534092	0.002324167	0.01638659	-1.785511415	1.785511415
Fchsd1	588.5766965	0.41738542	0.141493485	2.949856101	0.00317922	0.021011469	-1.677543585	1.677543585
Lmnb1	254.5923866	0.417186677	0.146830725	2.84127643	0.004493335	0.027630898	-1.558604995	1.558604995
Camk2g	2490.942231	0.417182733	0.10395215	4.013218883	5.99E-05	0.000809127	-3.091983054	3.091983054
Kctd2	715.1336353	0.4170495	0.085576407	4.873416804	1.10E-06	2.50E-05	-4.601559793	4.601559793
Chchd6	1064.05684	0.415225409	0.133844312	3.102301495	0.001920223	0.014024603	-1.853109418	1.853109418
Mxd4	622.1626749	0.414969566	0.147881751	2.806090427	0.005014662	0.030059488	-1.522018418	1.522018418
Nup210	943.2731591	0.41460184	0.137022733	3.02578873	0.002479855	0.017211193	-1.764189016	1.764189016
Sema6c	432.9561939	0.414567023	0.145678635	2.845764057	0.004430501	0.027318156	-1.563548618	1.563548618
Tmem206	499.8931381	0.414490603	0.107452165	3.857443018	0.000114579	0.001401005	-2.853560428	2.853560428
Sidt2	2261.911463	0.414329929	0.157609616	2.628836616	0.008567751	0.045007442	-1.346715665	1.346715665
Dnajc6	13290.33856	0.413741463	0.09838926	4.205148632	2.61E-05	0.000409455	-3.387793701	3.387793701
Tsc22d2	3009.669622	0.413338088	0.154840435	2.669445405	0.007597662	0.041185915	-1.385251276	1.385251276
Psme1	1498.448162	0.412637084	0.081169415	5.083652335	3.70E-07	9.74E-06	-5.011518604	5.011518604
Ifi30	111.6052847	0.412234162	0.15339595	2.687386212	0.007201363	0.039417252	-1.404313658	1.404313658
Ica1l	2088.776907	0.412157068	0.08997046	4.581026572	4.63E-06	9.10E-05	-4.041167777	4.041167777
Samd1	782.0794652	0.411835704	0.112843016	3.649633958	0.000262614	0.002788996	-2.554552032	2.554552032
Ndrg3	10229.624	0.411409002	0.100782401	4.082151232	4.46E-05	0.000636373	-3.196288107	3.196288107
D430019H16Rik	10460.77544	0.411228074	0.143397139	2.867756474	0.004133936	0.02583984	-1.58771018	1.58771018
Fam214b	707.6318861	0.411186454	0.132932402	3.093199613	0.001980109	0.014393509	-1.841833331	1.841833331
Tvp23a	1593.22095	0.410912703	0.086311147	4.760830036	1.93E-06	4.16E-05	-4.381131625	4.381131625
Triqk	406.8023282	0.410544509	0.14464357	2.838318432	0.004535191	0.027827486	-1.55552603	1.55552603
Ift27	561.9096543	0.409722575	0.128448835	3.189772598	0.001423848	0.011095106	-1.954868546	1.954868546
Nipa1	1537.876897	0.409551496	0.073822743	5.547768572	2.89E-08	9.81E-07	-6.008296325	6.008296325
Tprkb	1122.782943	0.409444936	0.11073568	3.697497813	0.000217735	0.002393668	-2.620935997	2.620935997
Gas7	15394.03723	0.407892905	0.149502039	2.728343422	0.00636533	0.035930919	-1.444531675	1.444531675
D10Bwg1379e	3979.341375	0.407737409	0.129036326	3.159865305	0.001578421	0.011995146	-1.920994444	1.920994444
Tbc1d9b	2052.035525	0.407416587	0.108396639	3.758572119	0.000170886	0.001956324	-2.708559298	2.708559298
Fbxo44	1604.327908	0.40712221	0.153916852	2.645078849	0.008167188	0.043460066	-1.361909623	1.361909623
Acox3	346.8987594	0.406718436	0.133293873	3.051291301	0.002278594	0.016146176	-1.791930325	1.791930325
Coro1c	2131.842331	0.406184885	0.107611657	3.774543548	0.000160301	0.001855271	-2.731592533	2.731592533
Arxes1	2165.784976	0.405350638	0.132133937	3.067725433	0.002156947	0.015439681	-1.811361681	1.811361681
Mycbp	187.2249102	0.405246894	0.139031823	2.914777958	0.003559417	0.023080753	-1.636750025	1.636750025
Cnp	266.9356623	0.404855297	0.115289422	3.511643045	0.000445346	0.004325131	-2.364000719	2.364000719
Atxn7l1	408.2134468	0.404254508	0.135393059	2.985784587	0.002828518	0.019082044	-1.719375097	1.719375097
Nkain4	200.1065695	0.404036487	0.130758915	3.089934526	0.002002006	0.014521425	-1.837990767	1.837990767
Csad	162.765154	0.403624788	0.152838744	2.640853867	0.008269738	0.043830131	-1.358227233	1.358227233
Myo18a	1432.288265	0.403356326	0.129212552	3.121649704	0.001798408	0.01327269	-1.877041044	1.877041044
Cenpt	535.8010396	0.402454212	0.132928788	3.02759257	0.002465102	0.017132157	-1.766187959	1.766187959
Tusc3	10935.15012	0.401455177	0.084154589	4.770449034	1.84E-06	3.97E-05	-4.401297385	4.401297385
Ndufaf2	313.2421088	0.401455062	0.131640988	3.049620555	0.002291307	0.016202262	-1.790424346	1.790424346
Stmn1	30868.78506	0.398934942	0.139928336	2.850994673	0.00435827	0.026967294	-1.569162623	1.569162623
Lsm6	1123.253662	0.398433925	0.122497639	3.252584528	0.001143606	0.009383346	-2.027642252	2.027642252
Glipr2	437.0902526	0.398158837	0.134132963	2.968389184	0.00299365	0.02003598	-1.698189405	1.698189405
Zbtb1	360.0229165	0.398021274	0.134874777	2.95104305	0.003167028	0.02094729	-1.678872164	1.678872164
1500009C09Rik	1937.955846	0.396296769	0.102787615	3.855491441	0.000115497	0.001408151	-2.851350886	2.851350886
Dzip1	4106.093387	0.396287802	0.086418086	4.585704474	4.52E-06	8.92E-05	-4.049875557	4.049875557
Celf2	10168.16264	0.396022804	0.136642756	2.898234905	0.003752694	0.024012123	-1.619569448	1.619569448
Slc16a14	530.7769554	0.395824222	0.129993278	3.044959152	0.002327119	0.016393715	-1.785322631	1.785322631
Notch2	312.6229417	0.395502615	0.138962839	2.846103444	0.004425782	0.027304986	-1.563758042	1.563758042
Zfp667	853.6710756	0.394914728	0.131611479	3.000610054	0.002694394	0.018330996	-1.736813942	1.736813942
4930507D10Rik	1.067592395	-5.786180169	1.442373806	-4.011567698	6.03E-05	NA
1810043G02Rik	590.1465593	0.39451227	0.149276903	2.642821904	0.008221827	0.043658418	-1.359932004	1.359932004
Usp11	4562.355526	0.39437734	0.109920889	3.587828875	0.000333443	0.003408304	-2.46746164	2.46746164
Phactr3	2368.878168	0.394218365	0.109413717	3.603006787	0.000314557	0.003240658	-2.489366841	2.489366841
Syt11	15574.16241	0.394148824	0.151775629	2.59691775	0.009406445	0.048264121	-1.316375598	1.316375598
Slc23a2	2319.54682	0.394103916	0.134501908	2.930099063	0.00338854	0.022152102	-1.654585056	1.654585056
Aldh4a1	717.4481597	0.394044916	0.119798641	3.289226936	0.00100463	0.008499088	-2.070627669	2.070627669
Nfasc	1879.717047	0.393888261	0.142811147	2.75810586	0.005813737	0.0335064	-1.474872225	1.474872225
Smpd2	262.5479948	0.393570581	0.125228171	3.142827837	0.001673242	0.012546345	-1.901482784	1.901482784
Shisa4	630.3482047	0.393553273	0.12166453	3.234741233	0.00121753	0.009832241	-2.007347503	2.007347503
Gdf11	354.017724	0.393316513	0.129580948	3.035295838	0.002402999	0.016802084	-1.774636846	1.774636846
Tspyl3	593.86231	0.393278905	0.123414921	3.18663985	0.001439359	0.011190153	-1.95116396	1.95116396
6030458C11Rik	1201.862736	0.393268483	0.118348723	3.322963476	0.000890666	0.007699878	-2.113516159	2.113516159
Ano10	1014.009431	0.393015793	0.115296541	3.408738798	0.000652639	0.005989385	-2.222617772	2.222617772
Ctnnbip1	2052.555107	0.391787807	0.093664444	4.182887252	2.88E-05	0.000443863	-3.352751041	3.352751041
Kdsr	831.4700846	0.391052084	0.103401762	3.781870599	0.000155654	0.001816433	-2.740780695	2.740780695
Cotl1	2026.046298	0.39090614	0.141002919	2.772326575	0.005565717	0.032329788	-1.490397146	1.490397146
Synrg	1855.13983	0.390773826	0.123050599	3.175716571	0.001494669	0.011535184	-1.937975486	1.937975486
B3gnt1	1568.217512	0.390563451	0.143264686	2.726166949	0.006407458	0.036101547	-1.442474189	1.442474189
Rapgef2	5733.175091	0.390524526	0.112120944	3.483064917	0.000495708	0.00471579	-2.326445517	2.326445517
Lrch1	392.8790595	0.390202081	0.108166021	3.607436748	0.000309237	0.003191793	-2.495965217	2.495965217
Map3k9	2390.779301	0.389772624	0.11464481	3.399827898	0.000674283	0.006151237	-2.211037559	2.211037559
Dpy19l3	761.5969253	0.389617802	0.143289613	2.719093116	0.006546118	0.036719268	-1.43510599	1.43510599
Nek9	870.1526603	0.389398765	0.146480604	2.658364004	0.007852103	0.042172588	-1.374969743	1.374969743
Dcaf7	13243.09602	0.388826836	0.114833365	3.38600924	0.00070917	0.006420935	-2.192401722	2.192401722
Magi2	1881.424299	0.388770014	0.116642132	3.33301534	0.000859102	0.007471065	-2.126617472	2.126617472
Creg1	1354.519566	0.387906134	0.098705164	3.929947714	8.50E-05	0.001084435	-2.964796395	2.964796395
Sos1	3005.240993	0.387787329	0.130322094	2.975606965	0.002924094	0.019626011	-1.707167969	1.707167969
Parp11	1239.005177	0.387711886	0.101002627	3.838631705	0.000123722	0.001496538	-2.824912244	2.824912244
Trim32	5475.479623	0.387553376	0.087512718	4.428537765	9.49E-06	0.000172448	-3.763341223	3.763341223
Apba1	6117.561735	0.386849706	0.106350793	3.637487734	0.00027531	0.002905556	-2.53677074	2.53677074
Atp8a1	11088.16043	0.386826232	0.105263489	3.674837656	0.000238001	0.002572906	-2.58957601	2.58957601
Slc7a4	1013.408182	0.386755947	0.11097234	3.48515629	0.00049185	0.004687005	-2.329104553	2.329104553
Rad23a	671.928909	0.38667766	0.130415024	2.964977871	0.003027047	0.020195463	-1.694746192	1.694746192
Arhgef12	11331.06066	0.386555827	0.111363724	3.471110804	0.00051831	0.004905933	-2.309278413	2.309278413
Inpp5j	224.3532254	0.385995371	0.147508345	2.616769724	0.00887662	0.046148587	-1.335841595	1.335841595
Fance	274.8183837	0.385257141	0.137881571	2.794116271	0.005204176	0.030842172	-1.510855043	1.510855043
Rtn3	23717.07311	0.383403256	0.123336827	3.108587005	0.001879843	0.013771227	-1.861027359	1.861027359
Tprgl	2326.524009	0.382417305	0.067735378	5.645754378	1.64E-08	5.90E-07	-6.228962786	6.228962786
Fbxo25	3587.978892	0.38230872	0.093675317	4.08121083	4.48E-05	0.000637876	-3.195263481	3.195263481
Slc15a4	630.9372237	0.382199144	0.113603269	3.364332282	0.000767291	0.006855279	-2.163974895	2.163974895
Cxx1b	1602.982141	0.381916385	0.102593093	3.722632536	0.000197156	0.002207681	-2.656063771	2.656063771
Dlgap2	785.4419969	0.381874653	0.122004478	3.130005231	0.001748032	0.012991755	-1.886332188	1.886332188
Nudt16	217.8644374	0.381775281	0.130628218	2.922609585	0.003471115	0.02257829	-1.646308962	1.646308962
Nnmt	273.7118949	0.381532016	0.123822307	3.08128661	0.002061082	0.01488598	-1.827222555	1.827222555
Npc2	2790.030457	0.381381371	0.138801618	2.747672373	0.006001995	0.03433255	-1.464293936	1.464293936
Cd81	5759.075544	0.380758199	0.064439524	5.908768059	3.45E-09	1.40E-07	-6.855198741	6.855198741
Pnrc1	2000.316322	0.380397503	0.14473659	2.628205504	0.008583664	0.045041565	-1.346386532	1.346386532
Ube2h	3516.798458	0.37927522	0.107769211	3.519328156	0.000432641	0.004230214	-2.373637668	2.373637668
Ptprr	470.606567	0.377950301	0.124371405	3.038884226	0.002374561	0.016665351	-1.778185527	1.778185527
Lrch2	1277.655999	0.377882998	0.127485854	2.964117087	0.003035528	0.020240887	-1.693770454	1.693770454
Zbtb5	1144.060557	0.377571418	0.080103568	4.713540544	2.43E-06	5.14E-05	-4.289154746	4.289154746
Nt5c3b	1183.735571	0.377084929	0.107387157	3.511452761	0.000445665	0.004325131	-2.364000719	2.364000719
Ypel3	957.0620303	0.377055824	0.114887086	3.281968717	0.00103085	0.008642969	-2.063337034	2.063337034
N28178	1894.844735	0.376521627	0.101223475	3.719706589	0.000199454	0.0022238	-2.652904287	2.652904287
Usp35	217.8777349	0.37610123	0.123175915	3.053366637	0.002262893	0.016061878	-1.794203678	1.794203678
Rfx5	568.7194198	0.375931371	0.133198735	2.822334401	0.004767544	0.028897667	-1.539137215	1.539137215
Pou2f1	750.1844459	0.375577586	0.130934799	2.868432156	0.004125117	0.025808343	-1.588239873	1.588239873
Mmab	1011.340739	0.375231717	0.115302543	3.254323004	0.00113663	0.009335179	-2.02987735	2.02987735
Plat	1660.977897	0.374168526	0.133073663	2.811739882	0.004927433	0.029648165	-1.528002182	1.528002182
Tmem145	497.2160307	0.374081229	0.101308973	3.692478729	0.000222079	0.002435081	-2.613486598	2.613486598
Kif13a	933.2306598	0.3737959	0.131379499	2.845161553	0.00443889	0.027345897	-1.563107834	1.563107834
Scg3	5194.090589	0.372960561	0.106297391	3.508652062	0.000450384	0.004353279	-2.361183467	2.361183467
Hexim1	414.8363875	0.372759008	0.135695585	2.747023844	0.006013876	0.034365588	-1.463876216	1.463876216
Rabgap1l	13085.34205	0.371943381	0.089632941	4.149628234	3.33E-05	0.000500358	-3.300718798	3.300718798
Gmip	413.681728	0.371246143	0.116621054	3.183354393	0.001455793	0.011302309	-1.946832813	1.946832813
Smarcd3	1710.71415	0.371161691	0.120886945	3.070320719	0.00213829	0.015325623	-1.814581858	1.814581858
Kazn	749.7861494	0.371136248	0.138070942	2.688011272	0.007187897	0.0393563	-1.404985738	1.404985738
Tspan33	367.4150079	0.370921447	0.125544373	2.954504754	0.003131713	0.020770664	-1.68254962	1.68254962
Zer1	1657.556245	0.369636516	0.138694204	2.665118697	0.007696115	0.041599425	-1.380912674	1.380912674
Slc1a6	186.7162722	0.369431693	0.141081925	2.618561479	0.008830138	0.045975165	-1.337476699	1.337476699
Wdfy3	4472.794722	0.368968451	0.142335375	2.592247007	0.009535128	0.048790963	-1.311660611	1.311660611
Tmem175	873.7614624	0.368644877	0.10540092	3.49754896	0.000469555	0.004515318	-2.345311704	2.345311704
Dync1i1	5413.723851	0.36841648	0.072582071	5.075860681	3.86E-07	1.01E-05	-4.995731646	4.995731646
Dync1h1	29453.21617	0.367966334	0.138988148	2.64746555	0.008109762	0.043271536	-1.363797689	1.363797689
D15Ertd621e	2399.462526	0.367482799	0.136800831	2.686261458	0.007225652	0.039537383	-1.402992082	1.402992082
Gpr125	1095.400697	0.36675195	0.113153493	3.241189814	0.001190319	0.009654047	-2.015290586	2.015290586
Gprasp1	29966.84457	0.366274339	0.121547124	3.013434857	0.002583085	0.01774531	-1.750916412	1.750916412
Cbfb	1724.933978	0.365845553	0.11107832	3.293581991	0.000989195	0.008393741	-2.076044438	2.076044438
Fam3c	1178.436941	0.365810454	0.129763911	2.819046157	0.004816659	0.029068658	-1.536575012	1.536575012
Afap1	1866.695786	0.365034533	0.134810706	2.707756252	0.006773975	0.037562168	-1.425249353	1.425249353
Tarbp2	284.4696128	0.364446454	0.131471795	2.772050498	0.005570439	0.032346094	-1.490178161	1.490178161
2700081O15Rik	2703.494189	0.363974236	0.134014125	2.71593935	0.006608802	0.036952396	-1.432357394	1.432357394
Fdxacb1	194.723025	0.363555318	0.129222427	2.813407294	0.004901952	0.029509575	-1.530037039	1.530037039
Rnf130	5804.851396	0.363304596	0.130852568	2.776442223	0.00549574	0.032044568	-1.49424558	1.49424558
Mical2	1262.159435	0.362548708	0.101030452	3.588509224	0.000332574	0.003402495	-2.468202526	2.468202526
Rbm8a	967.0080493	0.361975178	0.13501305	2.681038447	0.007339408	0.040055995	-1.397332476	1.397332476
Mob3a	794.8537402	0.361797021	0.119015277	3.039920851	0.002366403	0.016621916	-1.779318919	1.779318919
Haus8	669.2803124	0.361180068	0.10643499	3.39343356	0.000690223	0.00627969	-2.202061763	2.202061763
Camk1g	1218.499923	0.361058256	0.135343665	2.667714494	0.007636912	0.041345593	-1.383570779	1.383570779
Ago1	2153.082872	0.359888091	0.134668253	2.672404827	0.007530973	0.040890038	-1.388382491	1.388382491
Saysd1	180.706812	0.358209183	0.131522746	2.723553105	0.006458383	0.036339973	-1.439615403	1.439615403
Tnfrsf21	1505.604957	0.35772201	0.129489904	2.7625475	0.005735222	0.033154725	-1.479454569	1.479454569
Kank3	209.3062715	0.355826517	0.131403852	2.707884977	0.006771349	0.037562168	-1.425249353	1.425249353
Dbndd1	770.3547994	0.355779174	0.116224841	3.061128498	0.002205044	0.015717341	-1.803620938	1.803620938
Hdac11	3590.941723	0.355347275	0.119418175	2.975654892	0.002923637	0.019626011	-1.707167969	1.707167969
Eif2d	753.2333119	0.355003955	0.091119829	3.896012092	9.78E-05	0.00122589	-2.911548547	2.911548547
Ngfrap1	4134.851998	0.354538363	0.104553514	3.390975085	0.000696444	0.006322666	-2.199099758	2.199099758
Tsen2	312.7707641	0.354478853	0.123301251	2.874900704	0.004041546	0.025436281	-1.594546385	1.594546385
Txn2	442.0663188	0.353626678	0.125600326	2.815491725	0.004870265	0.029371177	-1.532078643	1.532078643
Glg1	3280.646588	0.353443252	0.134390512	2.629971761	0.008539196	0.044933894	-1.347425945	1.347425945
Pcyox1	3382.359127	0.352871565	0.105609312	3.341292165	0.000833894	0.007318679	-2.135567317	2.135567317
Mid2	1557.132778	0.352471664	0.131241376	2.685674865	0.007238349	0.039581204	-1.402511003	1.402511003
Dock9	6095.015463	0.35229789	0.105762524	3.331027622	0.00086526	0.007511971	-2.124246113	2.124246113
Spag9	11567.20693	0.351766501	0.13617974	2.583104517	0.009791566	0.049741388	-1.303282096	1.303282096
Sil1	462.5100599	0.351523793	0.119818074	2.933812742	0.003348261	0.021935291	-1.658856604	1.658856604
Mfn1	967.7120606	0.35147472	0.100825952	3.485954873	0.000490384	0.004680483	-2.329709311	2.329709311
Sh3bgrl	9059.502883	0.351219844	0.125884285	2.790021362	0.005270456	0.031153317	-1.506495701	1.506495701
Tspyl4	22193.76364	0.350193579	0.117483867	2.98078014	0.002875151	0.019334849	-1.713659223	1.713659223
Dhx32	1939.347367	0.350038754	0.073857473	4.739381694	2.14E-06	4.58E-05	-4.338933556	4.338933556
Fam134b	2087.834306	0.349632809	0.124810328	2.801313118	0.005089511	0.03037875	-1.517430106	1.517430106
Enpp5	6619.813972	0.349242262	0.084228011	4.146390951	3.38E-05	0.000504722	-3.296947393	3.296947393
Cc2d2a	496.456484	0.348676047	0.109770056	3.176422225	0.001491038	0.011522957	-1.938436048	1.938436048
Itm2b	9416.269203	0.347926942	0.070455719	4.938235607	7.88E-07	1.86E-05	-4.729465768	4.729465768
Prmt2	3143.148611	0.347848955	0.075046911	4.635086938	3.57E-06	7.16E-05	-4.145375678	4.145375678
Reep5	13323.89014	0.347710922	0.0799868	4.347103814	1.38E-05	0.000237348	-3.624614958	3.624614958
Unc80	1814.406121	0.347200307	0.109041292	3.184117702	0.00145196	0.011277732	-1.947778222	1.947778222
Dscam	2019.095296	0.346896568	0.120309795	2.883360983	0.003934563	0.024874214	-1.604250632	1.604250632
Nav3	5087.659075	0.34578285	0.126422899	2.73512831	0.006235596	0.035428762	-1.45064402	1.45064402
Fabp5	6559.757915	0.345765845	0.118291431	2.922999935	0.003466766	0.022558693	-1.646686063	1.646686063
Fam20c	980.6452551	0.34564605	0.131945383	2.619614585	0.008802919	0.04590941	-1.338098289	1.338098289
Fam171b	11159.07771	0.344383655	0.098114389	3.510021902	0.00044807	0.004338364	-2.362674036	2.362674036
Ap2a2	10786.29701	0.344160448	0.079059795	4.353166475	1.34E-05	0.000231682	-3.635107532	3.635107532
Sh3kbp1	2243.367917	0.343511636	0.106412616	3.228110059	0.00124611	0.010024687	-1.998929199	1.998929199
Ap3m2	3713.704275	0.343269872	0.077976702	4.402210725	1.07E-05	0.000189863	-3.721560135	3.721560135
Arl8a	4138.697385	0.342886577	0.09493888	3.61165603	0.000304248	0.003157671	-2.500633119	2.500633119
Lamtor4	1059.011109	0.342647927	0.120418254	2.845481601	0.004434432	0.027328402	-1.563385767	1.563385767
Nrcam	12626.69388	0.342535621	0.118008262	2.902641024	0.003700305	0.023748899	-1.624356521	1.624356521
Zfp772	409.346579	0.341505628	0.104509254	3.267707079	0.001084225	0.009003269	-2.045599769	2.045599769
Apaf1	2229.615232	0.340126764	0.099257313	3.426717414	0.000610924	0.005649546	-2.247986462	2.247986462
Gna12	1202.913374	0.3394734	0.123795515	2.742210806	0.006102716	0.034767363	-1.458828242	1.458828242
Fbxl2	1398.646884	0.339303986	0.112223621	3.023463189	0.002498994	0.017288926	-1.762231973	1.762231973
Hecw1	10903.89426	0.339156859	0.127275328	2.664749444	0.00770457	0.041618482	-1.380713768	1.380713768
Osbpl2	2283.590714	0.338958349	0.068265782	4.965274531	6.86E-07	1.65E-05	-4.781222107	4.781222107
Phf20	3551.118296	0.338661802	0.094576278	3.580832401	0.000342501	0.003476793	-2.458821131	2.458821131
Cog1	604.3615861	0.337684519	0.126041184	2.679160163	0.007380708	0.040216404	-1.395596763	1.395596763
Serp2	2096.618774	0.33745894	0.109929166	3.069785307	0.002142127	0.015344053	-1.814059905	1.814059905
Pfkp	7274.659076	0.337252947	0.106707848	3.160526168	0.001574845	0.011989552	-1.921197056	1.921197056
Psap	29145.49783	0.335254195	0.085163378	3.936600495	8.26E-05	0.001060431	-2.97451767	2.97451767
Meaf6	1353.369709	0.334871207	0.097057941	3.450219557	0.000560131	0.005248817	-2.279938545	2.279938545
Nudt11	2134.595277	0.33484872	0.096829918	3.458112184	0.000543975	0.00512587	-2.290232423	2.290232423
Fbxw9	1481.235257	0.334370777	0.113499284	2.946016615	0.003218951	0.021215928	-1.673337963	1.673337963
Ccdc23	525.5801109	0.334102477	0.123693416	2.701053044	0.006912031	0.038099114	-1.41908512	1.41908512
Gtf3c5	316.2352813	0.333972938	0.128460232	2.599815766	0.009327382	0.047960467	-1.319116594	1.319116594
Anks1	904.5985165	0.333631916	0.127370357	2.619384309	0.008808865	0.04590941	-1.338098289	1.338098289
B3gat3	1716.167043	0.332673665	0.125155411	2.658084561	0.007858617	0.042194153	-1.374747729	1.374747729
Trappc9	1713.160914	0.332224903	0.114329866	2.905845296	0.003662625	0.023560794	-1.627810084	1.627810084
Tmx4	9912.092309	0.332176561	0.111953756	2.967087228	0.003006357	0.020097125	-1.696866076	1.696866076
Hsdl1	2828.532768	0.331745473	0.095173821	3.485679882	0.000490888	0.004680483	-2.329709311	2.329709311
Vrk1	418.5767538	0.331104083	0.097068763	3.411026103	0.000647189	0.005945828	-2.225787626	2.225787626
Ldlrad3	302.7949634	0.330661408	0.123353177	2.680607138	0.007348874	0.040076389	-1.397111416	1.397111416
Rab3d	1288.271958	0.330560786	0.109772861	3.011316125	0.002601179	0.01784058	-1.74859104	1.74859104
Leprot	949.9908191	0.330519398	0.125351527	2.636740106	0.008370694	0.044184912	-1.354726006	1.354726006
Tomm34	1140.3917	0.330446811	0.108968937	3.032486313	0.002425481	0.016913504	-1.771766413	1.771766413
Ppfia4	1838.12929	0.329156966	0.120548062	2.730504011	0.006323756	0.035761202	-1.44658789	1.44658789
Pnpla6	1144.111055	0.328962013	0.113852234	2.889376893	0.003860061	0.024541036	-1.6101071	1.6101071
Pet112	493.1356775	0.328571386	0.103841153	3.164173114	0.001555243	0.011899332	-1.924477408	1.924477408
Vezf1	1013.030362	0.327835027	0.103539902	3.166267493	0.001544087	0.011835433	-1.926815859	1.926815859
Ttc30b	740.8439913	0.327802483	0.109408098	2.996144615	0.002734167	0.018571661	-1.73114925	1.73114925
Cntn1	26068.29625	0.327560678	0.117641208	2.784404239	0.005362615	0.031529639	-1.501281004	1.501281004
Pdxp	5087.829552	0.327487857	0.089503633	3.658933677	0.000253267	0.00270162	-2.568375749	2.568375749
Wrn	482.6282035	0.327458781	0.103901053	3.151640644	0.00162356	0.012277396	-1.910893726	1.910893726
Deaf1	3337.868277	0.327438238	0.10838605	3.021036718	0.002519108	0.017383596	-1.75986038	1.75986038
Bend6	6890.956777	0.327294886	0.094419132	3.466404328	0.000527469	0.004981459	-2.302643446	2.302643446
Pde9a	374.5465503	0.326849067	0.115565663	2.828254173	0.004680263	0.028500152	-1.54515282	1.54515282
Mlh3	987.0619614	0.326751185	0.099484517	3.284442604	0.001021843	0.008605906	-2.065203378	2.065203378
Stim2	1390.603494	0.326697721	0.067728924	4.823607154	1.41E-06	3.15E-05	-4.501822196	4.501822196
Bbs1	897.7494198	0.3266332	0.120519265	2.710215655	0.006723947	0.037348874	-1.427722493	1.427722493
Gm16039	504.9250283	0.325831754	0.103422682	3.150486416	0.001629988	0.012309474	-1.90976051	1.90976051
Slc6a14	1.202701829	-5.757086385	1.512803745	-3.805573858	0.000141476	NA
Ube3b	2505.854853	0.325393754	0.124501499	2.613572974	0.008960095	0.046510962	-1.332444679	1.332444679
Gng2	38865.32829	0.325201769	0.11418385	2.848053984	0.004398746	0.02716797	-1.565942817	1.565942817
Iqcg	268.5851608	0.324097403	0.122468089	2.64638247	0.008135777	0.043378823	-1.362722236	1.362722236
Synj1	6139.538229	0.324021715	0.125465604	2.582554147	0.009807197	0.049805814	-1.30271996	1.30271996
Hipk1	2879.833143	0.322433637	0.121773433	2.647815945	0.008101362	0.043249952	-1.364014373	1.364014373
AI414108	1080.104191	0.322151581	0.12230464	2.634009486	0.008438313	0.044472333	-1.35191009	1.35191009
Tbc1d9	5211.365227	0.322023822	0.113015842	2.849368876	0.004380606	0.027065829	-1.567578668	1.567578668
Prkar1b	10132.75945	0.320521952	0.102445753	3.128699251	0.001755819	0.013030954	-1.885023773	1.885023773
Ndc1	716.2866233	0.319609995	0.114009643	2.803359325	0.005057329	0.030240105	-1.519416705	1.519416705
Ttc9	1921.805883	0.318790677	0.113910522	2.798606065	0.005132371	0.030558962	-1.514861397	1.514861397
Kif13b	352.9458444	0.318152169	0.117725939	2.702481483	0.006882402	0.037991578	-1.42031267	1.42031267
5730405O15Rik	194.2313589	0.318112145	0.121553971	2.617044445	0.008869479	0.046125662	-1.336057385	1.336057385
Cmc1	275.7684726	0.316608864	0.116024012	2.72882188	0.006356103	0.035908045	-1.444808235	1.444808235
Actl6b	2402.474164	0.316312818	0.071930823	4.397458653	1.10E-05	0.00019299	-3.714464485	3.714464485
Bcl10	450.9567318	0.31577887	0.101353838	3.115608409	0.001835659	0.013482789	-1.870220272	1.870220272
2310036O22Rik	1381.927443	0.314900913	0.103400034	3.045462389	0.002323228	0.01638659	-1.785511415	1.785511415
Ctnna2	6614.316492	0.314445551	0.079961355	3.932469041	8.41E-05	0.001074745	-2.968694638	2.968694638
Tub	9128.738422	0.314318946	0.116286063	2.70298037	0.00687208	0.037947008	-1.420822459	1.420822459
Bloc1s5	497.850042	0.314274241	0.119528828	2.629275675	0.008556696	0.044997937	-1.346807394	1.346807394
E130307A14Rik	485.3732788	0.314127243	0.105639813	2.973568701	0.002943585	0.019732593	-1.704815852	1.704815852
3830406C13Rik	1572.410125	0.314120978	0.108542644	2.893986795	0.003803842	0.024275007	-1.614840633	1.614840633
Ccdc71	963.003643	0.312744474	0.114606735	2.728849006	0.00635558	0.035908045	-1.444808235	1.444808235
Tubb2a	28072.51298	0.312388277	0.106379758	2.936538712	0.003318974	0.021798597	-1.661571451	1.661571451
Gm2a	1024.178026	0.311219018	0.11633118	2.675284639	0.007466583	0.040622862	-1.391229482	1.391229482
Dnm1l	8085.536806	0.309922703	0.0949009	3.265750924	0.001091742	0.009036844	-2.043983238	2.043983238
Ppp2r2b	4764.123196	0.309496834	0.111276563	2.781329915	0.005413669	0.031752419	-1.498223181	1.498223181
1500004A13Rik	1474.274814	0.308786209	0.098950932	3.120599295	0.001804834	0.013299	-1.876181005	1.876181005
Wdr7	7321.194719	0.308161473	0.117714816	2.61786479	0.008848186	0.046043286	-1.336833686	1.336833686
2010012O05Rik	411.2819685	0.307453128	0.102044448	3.012933416	0.002587357	0.017767429	-1.750375423	1.750375423
Lxn	690.3283336	0.306774579	0.113471226	2.703545107	0.006860414	0.037907377	-1.421276267	1.421276267
Chic2	360.3347576	0.306527857	0.107854777	2.842042477	0.004482552	0.027584683	-1.559331997	1.559331997
Pnmal1	1639.918361	0.306271229	0.073826183	4.148544799	3.35E-05	0.000501774	-3.29949167	3.29949167
Nsf	12446.06398	0.30594526	0.115932185	2.639001932	0.008315051	0.043946149	-1.357079176	1.357079176
Tspan9	1270.778173	0.305850077	0.102473319	2.984680119	0.00283875	0.019143425	-1.71798037	1.71798037
Lemd3	1391.195325	0.305337102	0.115963837	2.633037254	0.008462506	0.044585923	-1.350802236	1.350802236
Mapk9	6403.34325	0.30474471	0.078988141	3.858107146	0.000114269	0.001398217	-2.854425564	2.854425564
Dip2a	1495.625597	0.304496248	0.112386765	2.709360385	0.006741307	0.037432986	-1.426745525	1.426745525
Dclk1	27908.12548	0.304223346	0.104890519	2.900389375	0.003726994	0.023883877	-1.621895177	1.621895177
Sulf2	900.1414221	0.30385205	0.10797635	2.814061139	0.004891992	0.029460122	-1.530765457	1.530765457
Eefsec	481.3320927	0.303490588	0.116728295	2.599974477	0.009323069	0.047960467	-1.319116594	1.319116594
Ccdc93	1233.182168	0.303303525	0.101703491	2.982233184	0.00286154	0.019258652	-1.715374124	1.715374124
Tmem169	1300.153978	0.303126381	0.07932762	3.821195984	0.000132806	0.00159047	-2.798474442	2.798474442
Btrc	2171.414822	0.303099049	0.104541491	2.899318225	0.003739751	0.023947455	-1.620740634	1.620740634
Xxylt1	828.2318907	0.302234967	0.096016025	3.147755476	0.001645293	0.012401317	-1.906532189	1.906532189
Nrbp2	1473.389833	0.302142099	0.102465872	2.94870958	0.003191037	0.021064836	-1.676441926	1.676441926
Ctps2	1536.166956	0.302095263	0.100131293	3.016991522	0.00255297	0.017559855	-1.755479081	1.755479081
Txndc16	4039.998441	0.301379088	0.107640848	2.799857984	0.005112509	0.030478019	-1.516013268	1.516013268
Lgmn	2232.819716	0.30110702	0.084953422	3.544377781	0.000393541	0.003895271	-2.409462351	2.409462351
Zfp174	241.5131138	0.300928834	0.11095114	2.712264456	0.006682526	0.037177146	-1.429723956	1.429723956
Alg2	5598.408675	0.300303484	0.079463773	3.779124392	0.000157381	0.001830256	-2.737488096	2.737488096
Arhgef7	4797.806684	0.30020614	0.098233296	3.056052811	0.002242717	0.015932069	-1.797727825	1.797727825
Rbm43	482.4219084	0.299769688	0.115378262	2.598147026	0.009372835	0.048150197	-1.317401935	1.317401935
Tmem19	824.693718	0.299656776	0.110270979	2.7174582	0.006578546	0.0368198	-1.43391858	1.43391858
Abhd5	1431.529466	0.298344328	0.11338344	2.631286618	0.008506226	0.044774358	-1.348970634	1.348970634
Phka2	317.45969	0.298312345	0.111217609	2.682240228	0.007313092	0.039925276	-1.398752075	1.398752075
Gfra4	603.5851809	0.297734023	0.098127954	3.034140755	0.002412219	0.016852595	-1.77333321	1.77333321
Anapc5	10276.79479	0.296310134	0.090810874	3.262936684	0.001102642	0.009115689	-2.040210481	2.040210481
Orai2	3002.809933	0.296178735	0.091153435	3.249232857	0.001157167	0.009453277	-2.024417611	2.024417611
Wdr19	603.7191688	0.29511074	0.098207592	3.004968689	0.002656082	0.018133838	-1.74151028	1.74151028
Endod1	1816.884314	0.29412867	0.102566239	2.86769481	0.004134742	0.02583984	-1.58771018	1.58771018
Ccdc136	1050.276142	0.293221822	0.106332339	2.75759777	0.00582278	0.033546045	-1.47435867	1.47435867
Ap1m1	1201.171715	0.292211576	0.112326722	2.601443104	0.009283246	0.047835489	-1.320249786	1.320249786
Thnsl1	1237.846479	0.290986769	0.084707045	3.435213297	0.000592088	0.005502472	-2.259442175	2.259442175
Snx12	1035.15449	0.290041476	0.100308863	2.891484041	0.003834271	0.024404634	-1.612527699	1.612527699
Focad	1082.161317	0.288781578	0.097624807	2.958075776	0.00309566	0.020588152	-1.686382639	1.686382639
Tyw1	574.9114989	0.288602363	0.111591573	2.586237977	0.009702991	0.049410347	-1.306182097	1.306182097
Wdr59	1120.773478	0.288442488	0.077634412	3.715394782	0.000202887	0.002255395	-2.646777457	2.646777457
1700025G04Rik	2446.731583	0.288163237	0.106297698	2.710907592	0.006709932	0.037307842	-1.428199866	1.428199866
Tubb4b	10730.11088	0.287479787	0.11100069	2.5898919	0.009600607	0.049015979	-1.309662319	1.309662319
Wdr35	1657.204257	0.286963264	0.083859105	3.42196909	0.000621694	0.005731558	-2.241727283	2.241727283
Fhl1	4180.81809	0.285305796	0.062098908	4.594377027	4.34E-06	8.56E-05	-4.067413225	4.067413225
Slc9a7	1773.927436	0.284664194	0.097118027	2.931115909	0.003377467	0.02208827	-1.65583829	1.65583829
Dis3l	767.4533753	0.284139117	0.07634333	3.721859103	0.000197761	0.002212243	-2.655167125	2.655167125
Git2	603.7670717	0.283367646	0.09659702	2.933502987	0.003351604	0.021944626	-1.65867182	1.65867182
Commd1	781.9819498	0.282290616	0.105709732	2.670431671	0.007575379	0.041091502	-1.386247981	1.386247981
Mpdu1	1177.761062	0.282056702	0.096549926	2.92135595	0.003485114	0.022660622	-1.644728178	1.644728178
Jmjd8	786.3241915	0.281459285	0.089905853	3.130600246	0.001744494	0.012976887	-1.886829472	1.886829472
Micu3	1492.456436	0.28010507	0.098383123	2.847084565	0.004412164	0.027230922	-1.56493766	1.56493766
St8sia3	5213.076129	0.279023963	0.098628993	2.829025766	0.004668994	0.028491287	-1.545287938	1.545287938
Atp6v1a	25603.61813	0.277794596	0.07321933	3.794006246	0.000148236	0.001749772	-2.757018557	2.757018557
Taf9b	2183.799289	0.275879539	0.100340488	2.749433905	0.00596983	0.034194895	-1.466038721	1.466038721
Dennd2a	669.970652	0.275567736	0.097552423	2.824816941	0.004730764	0.028755822	-1.541274217	1.541274217
Ptpn9	1516.834238	0.274560732	0.089674235	3.061757158	0.002200419	0.015697623	-1.804166106	1.804166106
Ocrl	1614.969111	0.272117367	0.092730191	2.934506716	0.003340783	0.021916265	-1.65923346	1.65923346
Hn1	10501.00706	0.271850281	0.087019932	3.124000139	0.001784104	0.013190182	-1.879749215	1.879749215
Ttc8	390.8461674	0.271794878	0.102869753	2.64212629	0.008238733	0.043734437	-1.359176458	1.359176458
Rcan1	2100.560059	0.270697809	0.098542025	2.747029074	0.00601378	0.034365588	-1.463876216	1.463876216
Slc22a5	600.4697843	0.269971941	0.09558671	2.824366925	0.004737412	0.028778605	-1.540930268	1.540930268
Jazf1	3315.556624	0.266823447	0.084368747	3.162586351	0.001563744	0.011931935	-1.923289108	1.923289108
Ino80c	703.200302	0.266382631	0.092207695	2.88894144	0.003865411	0.024559769	-1.609775719	1.609775719
Erc2	8437.284141	0.265474549	0.088661639	2.994243635	0.002751262	0.018651731	-1.72928085	1.72928085
Ermp1	1191.194398	0.264334869	0.098098022	2.694599379	0.007047331	0.038699586	-1.41229368	1.41229368
Rab5b	6394.817089	0.262875383	0.071617083	3.670568127	0.000242012	0.002599627	-2.585088941	2.585088941
Fbxo21	3395.443785	0.262128392	0.099923669	2.623286308	0.008708606	0.045583854	-1.341188956	1.341188956
Mtmr9	2709.611513	0.261576568	0.097446587	2.684307123	0.007268031	0.039730646	-1.400874374	1.400874374
Ccdc28b	1736.085733	0.261207878	0.097490335	2.67932076	0.007377169	0.040210094	-1.395664911	1.395664911
Pold3	863.7200377	0.259706422	0.071920849	3.611003298	0.000305015	0.003163685	-2.499806727	2.499806727
Xpnpep1	1762.084209	0.256022188	0.090725884	2.821931024	0.004773544	0.028897667	-1.539137215	1.539137215
Evl	4053.168422	0.254963432	0.09370505	2.720914534	0.006510159	0.036594722	-1.436581544	1.436581544
Slc6a15	3651.025784	0.253666211	0.090455456	2.80432185	0.005042254	0.030160647	-1.52055934	1.52055934
B4galt2	3070.753176	0.252477264	0.07510564	3.361628572	0.000774843	0.00691543	-2.160180779	2.160180779
Vps4b	1192.854627	0.250685612	0.091183432	2.749245191	0.005973269	0.034202988	-1.465935949	1.465935949
Tsnax	2084.924524	0.250128793	0.086657349	2.886411787	0.00389662	0.024708344	-1.607156368	1.607156368
Tmem65	4474.012333	0.250110765	0.089989674	2.779327385	0.00544716	0.031892669	-1.496309133	1.496309133
Osbpl8	11598.02696	0.247080043	0.083579628	2.956223295	0.003114315	0.020695918	-1.684115295	1.684115295
Cmas	3368.716109	0.246816252	0.084576426	2.918262957	0.003519874	0.022860227	-1.640919467	1.640919467
Rimklb	4015.23187	0.246811404	0.069119457	3.570794901	0.0003559	0.003585751	-2.44541985	2.44541985
Erlin2	2428.570827	0.246494212	0.080546402	3.060275889	0.002211332	0.015742222	-1.802933972	1.802933972
Pja1	7195.318249	0.241983524	0.087149408	2.776651362	0.005492206	0.032044568	-1.49424558	1.49424558
Dgcr2	4517.094852	0.239819719	0.089944661	2.666302986	0.007669054	0.041479708	-1.382164309	1.382164309
Reep1	9326.59781	0.239443405	0.084720493	2.826274928	0.004709283	0.028636279	-1.543083409	1.543083409
Rere	1972.391925	0.238136824	0.090458416	2.632555752	0.008474511	0.04462524	-1.350419435	1.350419435
Stradb	1155.490824	0.236213404	0.091355773	2.585642893	0.009719757	0.049480803	-1.305563257	1.305563257
Suv39h1	1216.178973	0.235700265	0.086949102	2.710784364	0.006712426	0.037309425	-1.42818145	1.42818145
Cd164	956.0490595	0.235065915	0.090157172	2.607290254	0.009126196	0.047199066	-1.326066593	1.326066593
Plekhb2	10947.96432	0.235000432	0.056863622	4.132702475	3.59E-05	0.000530588	-3.275242208	3.275242208
Nr1i2	0.967032471	-5.623231063	1.521515559	-3.695809109	0.000219188	NA
Aldh3a2	1432.429183	0.234768075	0.077422301	3.032305559	0.002426934	0.016913504	-1.771766413	1.771766413
Nub1	3834.032477	0.233485345	0.067589141	3.45448016	0.000551355	0.00517232	-2.286314576	2.286314576
Dirc2	3561.54667	0.232044882	0.083591776	2.775929559	0.005504413	0.032061926	-1.494010397	1.494010397
Zfp532	2668.393551	0.231179333	0.084960155	2.721032381	0.006507839	0.036593861	-1.436591771	1.436591771
Anapc7	743.6733807	0.221558703	0.084285471	2.628670172	0.008571946	0.045007442	-1.346715665	1.346715665
Mtch1	9571.541549	0.219254496	0.071972562	3.046362233	0.002316286	0.016351507	-1.786442209	1.786442209
Map4	14743.0515	0.214320578	0.081209821	2.639096802	0.008312724	0.043946149	-1.357079176	1.357079176
Ctsb	11139.27692	0.214258245	0.072349902	2.961417189	0.003062268	0.02039821	-1.69040794	1.69040794
Pink1	4094.807414	0.213281877	0.081482995	2.617501697	0.008857605	0.046078101	-1.336505432	1.336505432
Tbc1d24	4238.941145	0.21257182	0.08049177	2.640913734	0.008268277	0.043830131	-1.358227233	1.358227233
Cnrip1	6519.059225	0.212199488	0.076339568	2.77967893	0.005441267	0.031881065	-1.496467174	1.496467174
Pccb	1729.920623	0.211136211	0.067051771	3.14885361	0.001639123	0.012372923	-1.9075277	1.9075277
Gabbr1	18593.77362	0.19682316	0.074141542	2.654694733	0.007938021	0.042498865	-1.371622673	1.371622673
Gosr1	1656.690961	0.175866237	0.061054834	2.880463738	0.003970906	0.025075813	-1.600744982	1.600744982
Polr2m	4978.75276	0.171585574	0.052372726	3.27623915	0.001051994	0.008789697	-2.056026099	2.056026099
Trappc8	2756.261209	-0.173039027	0.062295021	-2.777734461	0.005473933	0.031972617	-1.495221813	1.495221813
Lman1	1281.923384	-0.201371881	0.076284318	-2.639754611	0.008296608	0.04390364	-1.357499468	1.357499468
Ehbp1	2320.678509	-0.207847387	0.08014123	-2.593513805	0.009500073	0.048626318	-1.313128611	1.313128611
Tmed2	5911.743622	-0.210920545	0.076824772	-2.745475707	0.006042324	0.034493132	-1.46226737	1.46226737
Lrrc49	2371.248351	-0.214023581	0.067986466	-3.148032151	0.001643736	0.012401317	-1.906532189	1.906532189
Trappc10	3447.605901	-0.214165654	0.075856182	-2.823311793	0.004753032	0.028849642	-1.539859574	1.539859574
Map4k3	3071.450209	-0.216127038	0.061841482	-3.494855429	0.000474319	0.004545598	-2.342408963	2.342408963
Rwdd1	1501.882739	-0.222025574	0.085094201	-2.609173978	0.009076109	0.046983191	-1.328057493	1.328057493
Cd2bp2	2221.519569	-0.224635149	0.07231596	-3.106301152	0.001894437	0.013854248	-1.858417042	1.858417042
Mmachc	652.1254378	-0.22513858	0.084795817	-2.655067053	0.007929265	0.042475098	-1.371865615	1.371865615
Ttc4	1831.019866	-0.228756758	0.082985722	-2.756579714	0.005840937	0.033601832	-1.473637045	1.473637045
Gart	930.485669	-0.234624948	0.085376891	-2.748108369	0.005994019	0.034298547	-1.464724279	1.464724279
Fam178a	2102.278805	-0.235328434	0.087136958	-2.700673051	0.006919933	0.038099114	-1.41908512	1.41908512
Ubxn4	2939.402391	-0.235331027	0.068488454	-3.436068588	0.000590222	0.005491174	-2.260334797	2.260334797
Gtdc1	1179.885533	-0.235581541	0.085834142	-2.744613442	0.006058221	0.034560514	-1.461419801	1.461419801
Emc6	1086.135721	-0.236247006	0.088709577	-2.66315107	0.007741265	0.041736591	-1.379483028	1.379483028
1810030O07Rik	558.1628554	-0.236290627	0.087884318	-2.688655178	0.007174048	0.039314494	-1.405447309	1.405447309
Naa25	2264.375191	-0.236406121	0.086419055	-2.73557864	0.006227071	0.035404146	-1.45094588	1.45094588
Ralgps2	2951.763736	-0.236574645	0.086518542	-2.734380859	0.006249771	0.035483486	-1.449973717	1.449973717
U2surp	5688.695383	-0.23754288	0.089955459	-2.640672211	0.008274173	0.043839876	-1.358130683	1.358130683
[truncated: 22,441 more rows]

## Sheet: KCl6h
KCl6h__KO_minus_WT_23092015
[truncated: 24,016 more rows]
