# Supplementary material for: Cohesin-dependence of neuronal gene expression relates to chromatin loop length
Source: eLife. 2022 Apr 26;11:e76539. doi: 10.7554/eLife.76539 (PMC9106336; doi:10.7554/eLife.76539)
Supplement: Supplementary file 6. [file elife-76539-supp6.xlsx]

## Sheet: BDNF 30
Supplementary Data 5.
RNAseq RAD21-TEV 4OHT vs EtOH, BDNF 30 min and 120 min
ensembl_id	log2FoldChange	lfcSE	stat	pvalue	padj	mgi_symbol
ENSMUSG00000044071	-2.15972	0.146993	-14.6927	7.17563e-49	1.17946e-44	Fam19a2
ENSMUSG00000013846	-2.604	0.224026	-11.6236	3.12529e-31	2.32318e-27	St3gal1
ENSMUSG00000048107	-1.63716	0.141164	-11.5976	4.24016e-31	2.32318e-27	Kctd12
ENSMUSG00000046387	-1.43577	0.151819	-9.45713	3.16515e-21	1.30064e-17	Pcdhb17
ENSMUSG00000005198	1.21609	0.133059	9.13951	6.27338e-20	2.06231e-16	Polr2a
ENSMUSG00000028086	-1.15676	0.128001	-9.03709	1.60901e-19	4.40787e-16	Fbxw7
ENSMUSG00000024647	-1.46808	0.162978	-9.00783	2.10171e-19	4.93512e-16	Cbln2
ENSMUSG00000091969	-1.1028	0.13459	-8.19378	2.53155e-16	5.20139e-13	Pcdha3
ENSMUSG00000053846	-2.42931	0.297752	-8.15885	3.3823e-16	6.1772e-13	Lipg
ENSMUSG00000022346	-1.49642	0.185942	-8.04779	8.42994e-16	1.26804e-12	Myc
ENSMUSG00000046191	-1.22387	0.152091	-8.04698	8.48597e-16	1.26804e-12	Pcdhb20
ENSMUSG00000032537	-1.46993	0.185968	-7.9042	2.6967e-15	3.69381e-12	Ephb1
ENSMUSG00000039959	-0.820751	0.104072	-7.88636	3.11117e-15	3.93372e-12	Hip1
ENSMUSG00000045994	-1.03384	0.132687	-7.79158	6.61751e-15	7.76942e-12	B3gat1
ENSMUSG00000025790	-1.34298	0.173155	-7.75593	8.76958e-15	9.6097e-12	Slco3a1
ENSMUSG00000047910	-1.36643	0.182622	-7.4823	7.3035e-14	7.50298e-11	Pcdhb16
ENSMUSG00000026259	-1.25617	0.168612	-7.45008	9.32823e-14	9.0193e-11	Ngef
ENSMUSG00000036902	-1.50093	0.201907	-7.43377	1.05545e-13	9.28863e-11	Neto2
ENSMUSG00000039683	-1.52054	0.204608	-7.4315	1.0737e-13	9.28863e-11	Sdk1
ENSMUSG00000024211	-2.3295	0.317538	-7.33613	2.19859e-13	1.80691e-10	Grm8
ENSMUSG00000028222	-2.43966	0.333553	-7.31416	2.58991e-13	2.02716e-10	Calb1
ENSMUSG00000035274	-1.92797	0.264836	-7.27987	3.34152e-13	2.49657e-10	Tpbg
ENSMUSG00000043067	-0.989053	0.136615	-7.23971	4.49647e-13	3.21341e-10	Dpy19l1
ENSMUSG00000058152	-1.52513	0.212989	-7.16061	8.03204e-13	5.50094e-10	Chsy3
ENSMUSG00000067028	-1.78156	0.24927	-7.14711	8.86249e-13	5.82691e-10	Cntnap5b
ENSMUSG00000052581	-1.88402	0.266595	-7.06697	1.58356e-12	1.00112e-09	Lrrtm4
ENSMUSG00000036782	-1.01455	0.144279	-7.03183	2.03837e-12	1.24091e-09	Klhl13
ENSMUSG00000022206	-1.7924	0.255971	-7.00238	2.51659e-12	1.4536e-09	Npr3
ENSMUSG00000022231	-1.74614	0.249521	-6.99795	2.59728e-12	1.4536e-09	Sema5a
ENSMUSG00000030518	-1.45085	0.207413	-6.99498	2.65303e-12	1.4536e-09	Fam189a1
ENSMUSG00000021614	-1.99598	0.28636	-6.97017	3.16552e-12	1.67844e-09	Vcan
ENSMUSG00000025089	-2.73493	0.392995	-6.95921	3.42195e-12	1.75771e-09	Gfra1
ENSMUSG00000029093	-1.50456	0.219309	-6.86044	6.86483e-12	3.41931e-09	Sorcs2
ENSMUSG00000043313	-1.29075	0.188442	-6.84956	7.4076e-12	3.58114e-09	Pcdhb19
ENSMUSG00000005148	-2.38391	0.355178	-6.71187	1.92147e-11	9.02377e-09	Klf5
ENSMUSG00000039579	-1.92099	0.286674	-6.70096	2.07062e-11	9.45409e-09	Grin3a
ENSMUSG00000022262	1.03578	0.156881	6.60234	4.04726e-11	1.75065e-08	Dnahc5
ENSMUSG00000054204	-3.8892	0.58874	-6.60596	3.94937e-11	1.75065e-08	Fam150b
ENSMUSG00000044022	-1.23775	0.189671	-6.52577	6.76527e-11	2.8513e-08	Pcdhb21
ENSMUSG00000018841	1.15362	0.17835	6.46831	9.91075e-11	4.07258e-08	Rad51l3
ENSMUSG00000020704	-1.5929	0.247658	-6.43185	1.26057e-10	5.05366e-08	Accn1
ENSMUSG00000019889	-1.44625	0.226886	-6.37435	1.83737e-10	7.19068e-08	Ptprk
ENSMUSG00000024431	-1.55918	0.245351	-6.35488	2.08592e-10	7.97355e-08	Nr3c1
ENSMUSG00000061353	-2.66584	0.422608	-6.30806	2.82551e-10	1.03207e-07	Cxcl12
ENSMUSG00000063415	-2.29469	0.363633	-6.31047	2.78198e-10	1.03207e-07	Cyp26b1
ENSMUSG00000047842	-1.21065	0.194118	-6.2367	4.46889e-10	1.59685e-07	Diras2
ENSMUSG00000027358	-2.54869	0.41201	-6.18598	6.17164e-10	2.1406e-07	Bmp2
ENSMUSG00000072720	1.1298	0.182698	6.18397	6.25108e-10	2.1406e-07	Myo18b
ENSMUSG00000039910	-1.55303	0.251568	-6.17339	6.68419e-10	2.2422e-07	Cited2
ENSMUSG00000075012	-1.26275	0.204847	-6.16439	7.07571e-10	2.32607e-07	Fjx1
ENSMUSG00000019943	-0.497965	0.0827465	-6.01795	1.76635e-09	5.69284e-07	Atp2b1
ENSMUSG00000051242	-0.814373	0.135524	-6.00907	1.86594e-09	5.89815e-07	Pcdhb9
ENSMUSG00000058248	-1.43702	0.239864	-5.99097	2.08597e-09	6.46926e-07	Kcnh1
ENSMUSG00000048347	-1.19197	0.200376	-5.9487	2.70286e-09	8.2272e-07	Pcdhb18
ENSMUSG00000048218	-1.08049	0.182006	-5.93657	2.91042e-09	8.69794e-07	Amigo2
ENSMUSG00000027347	-1.32278	0.224175	-5.90064	3.62101e-09	1.06283e-06	Rasgrp1
ENSMUSG00000031673	-0.876612	0.148679	-5.89599	3.72438e-09	1.07399e-06	Cdh11
ENSMUSG00000070695	-0.824956	0.139995	-5.89273	3.79865e-09	1.07652e-06	Cntnap5a
ENSMUSG00000052539	-0.669666	0.11469	-5.83891	5.25441e-09	1.46384e-06	Magi3
ENSMUSG00000047904	-1.91141	0.329526	-5.80047	6.61285e-09	1.81159e-06	Sstr2
ENSMUSG00000041592	-1.38451	0.239365	-5.7841	7.29005e-09	1.96437e-06	Sdk2
ENSMUSG00000073591	-1.19871	0.207363	-5.78074	7.43728e-09	1.97172e-06	Pcdhb22
ENSMUSG00000033849	-1.75531	0.304042	-5.77325	7.77548e-09	2.02866e-06	B3galt2
ENSMUSG00000055409	-1.79151	0.311573	-5.74989	8.93039e-09	2.29358e-06	Nell1
ENSMUSG00000021478	-1.04336	0.182665	-5.71187	1.1174e-08	2.82564e-06	Drd1a
ENSMUSG00000019899	1.09576	0.192689	5.68665	1.29552e-08	3.22644e-06	Lama2
ENSMUSG00000041046	-2.01183	0.354911	-5.66856	1.44002e-08	3.53277e-06	Ramp3
ENSMUSG00000091002	-1.24425	0.219641	-5.66491	1.471e-08	3.55571e-06	Tcerg1l
ENSMUSG00000026640	-0.757091	0.134382	-5.63386	1.76223e-08	4.19794e-06	Plxna2
ENSMUSG00000029135	-1.92353	0.341581	-5.63125	1.78912e-08	4.20111e-06	Fosl2
ENSMUSG00000055254	-0.69756	0.125122	-5.57504	2.47474e-08	5.7292e-06	Ntrk2
ENSMUSG00000043531	-1.1398	0.205555	-5.545	2.93948e-08	6.71058e-06	Sorcs1
ENSMUSG00000030616	1.11414	0.201113	5.53986	3.02718e-08	6.81614e-06	Sytl2
ENSMUSG00000047033	-1.11566	0.203184	-5.49089	3.99921e-08	8.88311e-06	Pcdhb15
ENSMUSG00000021676	-1.49955	0.273652	-5.47978	4.25847e-08	9.33286e-06	Iqgap2
ENSMUSG00000041708	-0.858114	0.157125	-5.46136	4.72495e-08	1.02189e-05	Mpped1
ENSMUSG00000022508	-2.0918	0.383407	-5.45583	4.87447e-08	1.04054e-05	Bcl6
ENSMUSG00000024261	-1.02988	0.189091	-5.44649	5.1374e-08	1.08261e-05	Syt4
ENSMUSG00000001986	-0.868075	0.159843	-5.43081	5.60979e-08	1.16719e-05	Gria3
ENSMUSG00000022332	-1.16863	0.215459	-5.42388	5.83176e-08	1.19821e-05	Khdrbs3
ENSMUSG00000030657	-1.01372	0.187542	-5.40533	6.46893e-08	1.28108e-05	Xylt1
ENSMUSG00000037321	0.92598	0.171304	5.40548	6.46335e-08	1.28108e-05	Tap1
ENSMUSG00000059003	-1.16998	0.216411	-5.4063	6.43398e-08	1.28108e-05	Grin2a
ENSMUSG00000026077	-1.52162	0.282571	-5.38491	7.24789e-08	1.41104e-05	Npas2
ENSMUSG00000044167	-1.02189	0.189812	-5.3837	7.29683e-08	1.41104e-05	Foxo1
ENSMUSG00000041729	0.489562	0.0911584	5.37045	7.85405e-08	1.50113e-05	Coro2b
ENSMUSG00000072566	-0.774388	0.144394	-5.36303	8.18371e-08	1.54616e-05	Pvt1
ENSMUSG00000023192	-0.815578	0.153245	-5.32205	1.02603e-07	1.91645e-05	Grm2
ENSMUSG00000045954	1.37422	0.259454	5.29657	1.17996e-07	2.1792e-05	Sdpr
ENSMUSG00000053465	-1.40149	0.26497	-5.28924	1.22824e-07	2.24317e-05	Hs6st3
ENSMUSG00000022454	-0.51423	0.0976151	-5.26794	1.37966e-07	2.49204e-05	Nell2
ENSMUSG00000021730	-1.20509	0.229102	-5.26005	1.44016e-07	2.57303e-05	Hcn1
ENSMUSG00000029821	0.640548	0.122085	5.24673	1.54821e-07	2.73634e-05	Dfna5
ENSMUSG00000027674	-1.34332	0.256168	-5.24389	1.57223e-07	2.74923e-05	Pex5l
ENSMUSG00000056752	1.05212	0.201551	5.22012	1.78805e-07	3.09371e-05	Dnahc9
ENSMUSG00000007440	-0.380728	0.0730589	-5.21124	1.87578e-07	3.21169e-05	Pcdha9
ENSMUSG00000007440	-0.380728	0.0730589	-5.21124	1.87578e-07	3.21169e-05	Pcdha5
ENSMUSG00000007440	-0.380728	0.0730589	-5.21124	1.87578e-07	3.21169e-05	Pcdha4
ENSMUSG00000007440	-0.380728	0.0730589	-5.21124	1.87578e-07	3.21169e-05	Pcdhac1
ENSMUSG00000007440	-0.380728	0.0730589	-5.21124	1.87578e-07	3.21169e-05	Pcdha2
ENSMUSG00000007440	-0.380728	0.0730589	-5.21124	1.87578e-07	3.21169e-05	Pcdha10
ENSMUSG00000007440	-0.380728	0.0730589	-5.21124	1.87578e-07	3.21169e-05	Pcdha4
ENSMUSG00000007440	-0.380728	0.0730589	-5.21124	1.87578e-07	3.21169e-05	Pcdha4
ENSMUSG00000007440	-0.380728	0.0730589	-5.21124	1.87578e-07	3.21169e-05	Pcdha9
ENSMUSG00000007440	-0.380728	0.0730589	-5.21124	1.87578e-07	3.21169e-05	Pcdha1
ENSMUSG00000007440	-0.380728	0.0730589	-5.21124	1.87578e-07	3.21169e-05	Pcdha12
ENSMUSG00000007440	-0.380728	0.0730589	-5.21124	1.87578e-07	3.21169e-05	Pcdhac2
ENSMUSG00000007440	-0.380728	0.0730589	-5.21124	1.87578e-07	3.21169e-05	Pcdha5
ENSMUSG00000007440	-0.380728	0.0730589	-5.21124	1.87578e-07	3.21169e-05	Pcdha1
ENSMUSG00000007440	-0.380728	0.0730589	-5.21124	1.87578e-07	3.21169e-05	Pcdha1
ENSMUSG00000007440	-0.380728	0.0730589	-5.21124	1.87578e-07	3.21169e-05	Pcdha4
ENSMUSG00000007440	-0.380728	0.0730589	-5.21124	1.87578e-07	3.21169e-05	Pcdha12
ENSMUSG00000007440	-0.380728	0.0730589	-5.21124	1.87578e-07	3.21169e-05	Pcdha5
ENSMUSG00000007440	-0.380728	0.0730589	-5.21124	1.87578e-07	3.21169e-05	Pcdhac2
ENSMUSG00000007440	-0.380728	0.0730589	-5.21124	1.87578e-07	3.21169e-05	Pcdha2
ENSMUSG00000007440	-0.380728	0.0730589	-5.21124	1.87578e-07	3.21169e-05	Pcdha9
ENSMUSG00000007440	-0.380728	0.0730589	-5.21124	1.87578e-07	3.21169e-05	Pcdha9
ENSMUSG00000007440	-0.380728	0.0730589	-5.21124	1.87578e-07	3.21169e-05	Pcdha9
ENSMUSG00000007440	-0.380728	0.0730589	-5.21124	1.87578e-07	3.21169e-05	Pcdha5
ENSMUSG00000007440	-0.380728	0.0730589	-5.21124	1.87578e-07	3.21169e-05	Pcdha1
ENSMUSG00000007440	-0.380728	0.0730589	-5.21124	1.87578e-07	3.21169e-05	Pcdha10
ENSMUSG00000007440	-0.380728	0.0730589	-5.21124	1.87578e-07	3.21169e-05	Pcdha1
ENSMUSG00000007440	-0.380728	0.0730589	-5.21124	1.87578e-07	3.21169e-05	Pcdha4
ENSMUSG00000007440	-0.380728	0.0730589	-5.21124	1.87578e-07	3.21169e-05	Pcdha4
ENSMUSG00000007440	-0.380728	0.0730589	-5.21124	1.87578e-07	3.21169e-05	Pcdha2
ENSMUSG00000007440	-0.380728	0.0730589	-5.21124	1.87578e-07	3.21169e-05	Pcdha12
ENSMUSG00000007440	-0.380728	0.0730589	-5.21124	1.87578e-07	3.21169e-05	Pcdha5
ENSMUSG00000007440	-0.380728	0.0730589	-5.21124	1.87578e-07	3.21169e-05	Pcdha9
ENSMUSG00000007440	-0.380728	0.0730589	-5.21124	1.87578e-07	3.21169e-05	Pcdha9
ENSMUSG00000007440	-0.380728	0.0730589	-5.21124	1.87578e-07	3.21169e-05	Pcdha2
ENSMUSG00000007440	-0.380728	0.0730589	-5.21124	1.87578e-07	3.21169e-05	Pcdha4
ENSMUSG00000007440	-0.380728	0.0730589	-5.21124	1.87578e-07	3.21169e-05	Pcdha1
ENSMUSG00000007440	-0.380728	0.0730589	-5.21124	1.87578e-07	3.21169e-05	Pcdha10
ENSMUSG00000007440	-0.380728	0.0730589	-5.21124	1.87578e-07	3.21169e-05	Pcdha10
ENSMUSG00000007440	-0.380728	0.0730589	-5.21124	1.87578e-07	3.21169e-05	Pcdha2
ENSMUSG00000007440	-0.380728	0.0730589	-5.21124	1.87578e-07	3.21169e-05	Pcdha5
ENSMUSG00000007440	-0.380728	0.0730589	-5.21124	1.87578e-07	3.21169e-05	Pcdha2
ENSMUSG00000007440	-0.380728	0.0730589	-5.21124	1.87578e-07	3.21169e-05	Pcdha2
ENSMUSG00000007440	-0.380728	0.0730589	-5.21124	1.87578e-07	3.21169e-05	Pcdha12
ENSMUSG00000007440	-0.380728	0.0730589	-5.21124	1.87578e-07	3.21169e-05	Pcdha2
ENSMUSG00000007440	-0.380728	0.0730589	-5.21124	1.87578e-07	3.21169e-05	Pcdhac2
ENSMUSG00000007440	-0.380728	0.0730589	-5.21124	1.87578e-07	3.21169e-05	Pcdhac2
ENSMUSG00000007440	-0.380728	0.0730589	-5.21124	1.87578e-07	3.21169e-05	Pcdha9
ENSMUSG00000007440	-0.380728	0.0730589	-5.21124	1.87578e-07	3.21169e-05	Pcdhac1
ENSMUSG00000007440	-0.380728	0.0730589	-5.21124	1.87578e-07	3.21169e-05	Pcdhac2
ENSMUSG00000007440	-0.380728	0.0730589	-5.21124	1.87578e-07	3.21169e-05	Pcdha9
ENSMUSG00000007440	-0.380728	0.0730589	-5.21124	1.87578e-07	3.21169e-05	Pcdha1
ENSMUSG00000007440	-0.380728	0.0730589	-5.21124	1.87578e-07	3.21169e-05	Pcdha1
ENSMUSG00000007440	-0.380728	0.0730589	-5.21124	1.87578e-07	3.21169e-05	Pcdha11
ENSMUSG00000007440	-0.380728	0.0730589	-5.21124	1.87578e-07	3.21169e-05	Pcdha5
ENSMUSG00000007440	-0.380728	0.0730589	-5.21124	1.87578e-07	3.21169e-05	Pcdha5
ENSMUSG00000007440	-0.380728	0.0730589	-5.21124	1.87578e-07	3.21169e-05	Pcdha12
ENSMUSG00000007440	-0.380728	0.0730589	-5.21124	1.87578e-07	3.21169e-05	Pcdha12
ENSMUSG00000007440	-0.380728	0.0730589	-5.21124	1.87578e-07	3.21169e-05	Pcdha1
ENSMUSG00000007440	-0.380728	0.0730589	-5.21124	1.87578e-07	3.21169e-05	Pcdhac2
ENSMUSG00000007440	-0.380728	0.0730589	-5.21124	1.87578e-07	3.21169e-05	Pcdhac2
ENSMUSG00000007440	-0.380728	0.0730589	-5.21124	1.87578e-07	3.21169e-05	Pcdhac1
ENSMUSG00000007440	-0.380728	0.0730589	-5.21124	1.87578e-07	3.21169e-05	Pcdhac2
ENSMUSG00000007440	-0.380728	0.0730589	-5.21124	1.87578e-07	3.21169e-05	Pcdha10
ENSMUSG00000007440	-0.380728	0.0730589	-5.21124	1.87578e-07	3.21169e-05	Pcdhac1
ENSMUSG00000007440	-0.380728	0.0730589	-5.21124	1.87578e-07	3.21169e-05	Pcdhac2
ENSMUSG00000007440	-0.380728	0.0730589	-5.21124	1.87578e-07	3.21169e-05	Pcdha2
ENSMUSG00000007440	-0.380728	0.0730589	-5.21124	1.87578e-07	3.21169e-05	Pcdha4
ENSMUSG00000007440	-0.380728	0.0730589	-5.21124	1.87578e-07	3.21169e-05	Pcdha5
ENSMUSG00000007440	-0.380728	0.0730589	-5.21124	1.87578e-07	3.21169e-05	Pcdha11
ENSMUSG00000007440	-0.380728	0.0730589	-5.21124	1.87578e-07	3.21169e-05	Pcdhac1
ENSMUSG00000007440	-0.380728	0.0730589	-5.21124	1.87578e-07	3.21169e-05	Pcdha12
ENSMUSG00000007440	-0.380728	0.0730589	-5.21124	1.87578e-07	3.21169e-05	Pcdha4
ENSMUSG00000007440	-0.380728	0.0730589	-5.21124	1.87578e-07	3.21169e-05	Pcdhac1
ENSMUSG00000007440	-0.380728	0.0730589	-5.21124	1.87578e-07	3.21169e-05	Pcdha10
ENSMUSG00000007440	-0.380728	0.0730589	-5.21124	1.87578e-07	3.21169e-05	Pcdha11
ENSMUSG00000007440	-0.380728	0.0730589	-5.21124	1.87578e-07	3.21169e-05	Pcdha11
ENSMUSG00000007440	-0.380728	0.0730589	-5.21124	1.87578e-07	3.21169e-05	Pcdha10
ENSMUSG00000007440	-0.380728	0.0730589	-5.21124	1.87578e-07	3.21169e-05	Pcdha11
ENSMUSG00000007440	-0.380728	0.0730589	-5.21124	1.87578e-07	3.21169e-05	Pcdha10
ENSMUSG00000007440	-0.380728	0.0730589	-5.21124	1.87578e-07	3.21169e-05	Pcdhac1
ENSMUSG00000007440	-0.380728	0.0730589	-5.21124	1.87578e-07	3.21169e-05	Pcdha11
ENSMUSG00000007440	-0.380728	0.0730589	-5.21124	1.87578e-07	3.21169e-05	Pcdha12
ENSMUSG00000007440	-0.380728	0.0730589	-5.21124	1.87578e-07	3.21169e-05	Pcdha12
ENSMUSG00000007440	-0.380728	0.0730589	-5.21124	1.87578e-07	3.21169e-05	Pcdha11
ENSMUSG00000007440	-0.380728	0.0730589	-5.21124	1.87578e-07	3.21169e-05	Pcdha10
ENSMUSG00000007440	-0.380728	0.0730589	-5.21124	1.87578e-07	3.21169e-05	Pcdhac1
ENSMUSG00000007440	-0.380728	0.0730589	-5.21124	1.87578e-07	3.21169e-05	Pcdhac1
ENSMUSG00000007440	-0.380728	0.0730589	-5.21124	1.87578e-07	3.21169e-05	Pcdha11
ENSMUSG00000007440	-0.380728	0.0730589	-5.21124	1.87578e-07	3.21169e-05	Pcdha11
ENSMUSG00000005672	-0.978839	0.188052	-5.20516	1.9383e-07	3.28452e-05	Kit
ENSMUSG00000020205	-1.51263	0.292427	-5.17268	2.30761e-07	3.87042e-05	Phlda1
ENSMUSG00000038349	-0.891935	0.172587	-5.16802	2.36588e-07	3.88879e-05	Plcl1
ENSMUSG00000048251	-0.652492	0.126227	-5.16921	2.35088e-07	3.88879e-05	Bcl11b
ENSMUSG00000020867	-2.71666	0.528454	-5.14077	2.73608e-07	4.45276e-05	Spata20
ENSMUSG00000016150	-0.94162	0.183246	-5.13857	2.76838e-07	4.46116e-05	Odz1
ENSMUSG00000045216	-0.608781	0.119584	-5.0908	3.56553e-07	5.68996e-05	Hs6st1
ENSMUSG00000063434	-1.36814	0.270078	-5.06574	4.06812e-07	6.42958e-05	Sorcs3
ENSMUSG00000034402	-1.685	0.333197	-5.05706	4.25775e-07	6.6652e-05	Kcnh5
ENSMUSG00000066687	-1.19447	0.236291	-5.05508	4.30208e-07	6.67107e-05	Zbtb16
ENSMUSG00000056158	-1.96234	0.389662	-5.03599	4.75375e-07	7.30256e-05	Car10
ENSMUSG00000039145	-0.655708	0.130269	-5.03348	4.81644e-07	7.33036e-05	Camk1d
ENSMUSG00000035431	-1.53305	0.30523	-5.02262	5.09722e-07	7.68651e-05	Sstr1
ENSMUSG00000089762	-2.47022	0.492682	-5.01383	5.33585e-07	7.97321e-05	Ier5l
ENSMUSG00000059921	-0.91973	0.183913	-5.00091	5.70616e-07	8.44974e-05	Unc5c
ENSMUSG00000039115	-1.53793	0.310666	-4.95042	7.40523e-07	0.000108678	Itga9
ENSMUSG00000053199	-1.18672	0.240433	-4.93578	7.98314e-07	0.000116123	Arhgap20
ENSMUSG00000032452	-0.895559	0.181643	-4.93033	8.20898e-07	0.000118361	Clstn2
ENSMUSG00000039960	-0.58043	0.11818	-4.91141	9.04238e-07	0.000129243	Rhou
ENSMUSG00000032265	-2.63354	0.536571	-4.90809	9.19674e-07	0.000130316	Fam46a
ENSMUSG00000052516	-0.791024	0.161417	-4.90051	9.55904e-07	0.000134292	Robo2
ENSMUSG00000003746	-1.11522	0.229078	-4.86832	1.12551e-06	0.00015678	Man1a
ENSMUSG00000032564	-1.00746	0.20714	-4.86369	1.15216e-06	0.000159143	Cpne4
ENSMUSG00000071550	1.21726	0.250863	4.85229	1.22046e-06	0.000167172	Wdr52
ENSMUSG00000050394	0.567348	0.117342	4.835	1.33147e-06	0.000180871	Armcx6
ENSMUSG00000032503	-0.689307	0.142847	-4.82548	1.39665e-06	0.000187209	Arpp21
ENSMUSG00000046699	-1.11801	0.231717	-4.82488	1.4009e-06	0.000187209	Slitrk4
ENSMUSG00000031910	-1.05967	0.220155	-4.81331	1.48447e-06	0.000195713	Has3
ENSMUSG00000045062	-0.644618	0.133938	-4.81279	1.48836e-06	0.000195713	Pcdhb7
ENSMUSG00000028033	-0.881307	0.183256	-4.80917	1.5156e-06	0.000197713	Kcnq5
ENSMUSG00000019978	-0.728406	0.152017	-4.79161	1.65445e-06	0.000212455	Epb4.1l2
ENSMUSG00000051486	-0.637193	0.132958	-4.79244	1.64766e-06	0.000212455	Pcdhb11
ENSMUSG00000034997	-2.69634	0.565458	-4.76843	1.8567e-06	0.000236578	Htr2a
ENSMUSG00000029231	-1.33199	0.279596	-4.76397	1.89823e-06	0.000240009	Pdgfra
ENSMUSG00000059974	-0.606722	0.127919	-4.74302	2.10561e-06	0.000264197	Ntm
ENSMUSG00000060487	-1.12337	0.237094	-4.73809	2.15741e-06	0.000268647	Samd5
ENSMUSG00000027748	-1.38257	0.29291	-4.72014	2.35687e-06	0.000291277	Trpc4
ENSMUSG00000055026	-1.15684	0.245259	-4.71679	2.39595e-06	0.000293897	Gabrg3
ENSMUSG00000008575	0.78134	0.165987	4.70725	2.51084e-06	0.000305709	Nfib
ENSMUSG00000030093	-1.52085	0.324054	-4.6932	2.68968e-06	0.000325076	Wnt7a
ENSMUSG00000030256	0.83237	0.177728	4.68339	2.82173e-06	0.000338545	Bhlhe41
ENSMUSG00000028803	1.0378	0.221721	4.68067	2.85932e-06	0.00034057	Nipal3
ENSMUSG00000023927	-0.9267	0.198542	-4.66752	3.04859e-06	0.000360501	Satb1
ENSMUSG00000024798	-1.75654	0.376519	-4.6652	3.08324e-06	0.000360948	Htr7
ENSMUSG00000073565	-2.02089	0.433265	-4.66433	3.09629e-06	0.000360948	Prr16
ENSMUSG00000004151	-1.12465	0.241541	-4.65613	3.22212e-06	0.000372972	Etv1
ENSMUSG00000018589	-0.743488	0.160825	-4.62295	3.78314e-06	0.00043485	Glra2
ENSMUSG00000027230	-0.758447	0.164346	-4.61493	3.93234e-06	0.00044886	Creb3l1
ENSMUSG00000001260	-1.39467	0.302771	-4.60635	4.09807e-06	0.000464552	Gabrg1
ENSMUSG00000024642	-0.84099	0.182629	-4.60491	4.12645e-06	0.000464565	Tle4
ENSMUSG00000030075	-1.04218	0.226691	-4.59735	4.2789e-06	0.000478451	Cntn3
ENSMUSG00000020961	0.882996	0.192272	4.59244	4.38101e-06	0.000483293	Ston2
ENSMUSG00000030123	-1.01944	0.221929	-4.59355	4.35776e-06	0.000483293	Plxnd1
ENSMUSG00000046463	1.61386	0.352989	4.57199	4.83105e-06	0.000529386	5930403N24Rik
ENSMUSG00000026058	-1.00809	0.220686	-4.56799	4.92428e-06	0.000536029	Khdrbs2
ENSMUSG00000020014	0.918282	0.201179	4.56449	5.00703e-06	0.000541451	Gm872
ENSMUSG00000020014	0.918282	0.201179	4.56449	5.00703e-06	0.000541451	4930485B16Rik
ENSMUSG00000019979	0.4058	0.0891533	4.55171	5.32109e-06	0.000565482	Apaf1
ENSMUSG00000023032	0.650764	0.142977	4.55154	5.32557e-06	0.000565482	Slc4a8
ENSMUSG00000026156	-0.774205	0.170108	-4.55126	5.33246e-06	0.000565482	B3gat2
ENSMUSG00000030930	-1.0951	0.240914	-4.54559	5.47808e-06	0.0005772	Chst15
ENSMUSG00000024109	-0.388423	0.0855322	-4.54126	5.592e-06	0.000581745	Nrxn1
ENSMUSG00000059857	-1.23899	0.272775	-4.54215	5.56832e-06	0.000581745	Ntng1
ENSMUSG00000055333	1.59012	0.35055	4.53607	5.73128e-06	0.000592485	Fat2
ENSMUSG00000021640	1.56653	0.346075	4.52657	5.99489e-06	0.000613475	Naip1
ENSMUSG00000031772	-0.979778	0.216474	-4.52607	6.00897e-06	0.000613475	Cntnap4
ENSMUSG00000022514	-1.62532	0.359637	-4.51934	6.20321e-06	0.000629396	Il1rap
ENSMUSG00000071636	0.811207	0.179817	4.51129	6.44348e-06	0.000649764	Rimbp3
ENSMUSG00000063626	-0.770605	0.171432	-4.4951	6.95357e-06	0.000696926	Unc5d
ENSMUSG00000036510	-0.861183	0.192302	-4.47828	7.52475e-06	0.000749602	Cdh8
ENSMUSG00000022636	-1.18594	0.265021	-4.4749	7.64483e-06	0.000756976	Alcam
ENSMUSG00000053930	-1.1279	0.25267	-4.46393	8.04699e-06	0.000792026	Shisa6
ENSMUSG00000028804	-0.7302	0.164416	-4.44117	8.94692e-06	0.00087536	Csmd2
ENSMUSG00000021039	-0.421125	0.0949106	-4.43708	9.1189e-06	0.000886908	Snw1
ENSMUSG00000020029	-0.619863	0.139859	-4.43206	9.3338e-06	0.000902468	Nudt4
ENSMUSG00000027860	1.12156	0.253499	4.4243	9.6757e-06	0.000930055	Vangl1
ENSMUSG00000074505	-1.47738	0.334639	-4.41484	1.01087e-05	0.000966026	Fat3
ENSMUSG00000045038	-0.496647	0.112708	-4.40648	1.05065e-05	0.00099824	Prkce
ENSMUSG00000021536	-0.632248	0.143534	-4.40485	1.05856e-05	0.000999978	Adcy2
ENSMUSG00000045404	-1.5992	0.363285	-4.40204	1.07236e-05	0.00100722	Kcnk13
ENSMUSG00000036585	1.14449	0.260849	4.38755	1.14634e-05	0.00107059	Fgf1
ENSMUSG00000092094	-1.7865	0.407345	-4.38571	1.15607e-05	0.00107357	Zfp804b
ENSMUSG00000019831	-0.643255	0.147336	-4.36591	1.26594e-05	0.00116247	Wasf1
ENSMUSG00000038280	0.443219	0.10149	4.36711	1.25899e-05	0.00116247	Ostm1
ENSMUSG00000024544	-0.664205	0.152348	-4.35978	1.30194e-05	0.00118888	D18Ertd653e
ENSMUSG00000027386	-1.3717	0.316232	-4.33764	1.44022e-05	0.00130789	Fbln7
ENSMUSG00000039770	0.699058	0.161267	4.33479	1.45898e-05	0.00131765	Ypel5
ENSMUSG00000039239	-1.35998	0.314157	-4.32898	1.498e-05	0.00133819	Tgfb2
ENSMUSG00000051615	-0.42026	0.0970756	-4.3292	1.49651e-05	0.00133819	Rap2a
ENSMUSG00000001175	-0.555513	0.128698	-4.31642	1.58579e-05	0.00140138	Calm1
ENSMUSG00000001175	-0.555513	0.128698	-4.31642	1.58579e-05	0.00140138	Calm1
ENSMUSG00000001175	-0.555513	0.128698	-4.31642	1.58579e-05	0.00140138	Calm1
ENSMUSG00000040125	-0.835932	0.193663	-4.31644	1.58567e-05	0.00140138	Gpr26
ENSMUSG00000050663	-1.22813	0.285725	-4.29828	1.72125e-05	0.00151295	Trhde
ENSMUSG00000045875	-1.95537	0.456	-4.28809	1.80217e-05	0.00157565	Adra1a
ENSMUSG00000070509	-1.07904	0.25188	-4.28396	1.83594e-05	0.00159669	Rgma
ENSMUSG00000039488	-0.788177	0.184061	-4.28216	1.85091e-05	0.00160124	Cntn5
ENSMUSG00000022762	-0.887424	0.208178	-4.26281	2.0187e-05	0.00173724	Ncam2
ENSMUSG00000052713	1.06777	0.251374	4.24774	2.15939e-05	0.00184864	Zfp608
ENSMUSG00000032360	-2.22717	0.52465	-4.24507	2.18529e-05	0.00186112	Hcrtr2
ENSMUSG00000045498	-0.870871	0.205252	-4.24293	2.20623e-05	0.00186927	Pcdhb3
ENSMUSG00000037795	0.765281	0.180416	4.24175	2.21779e-05	0.00186943	N4bp2
ENSMUSG00000014907	-0.568063	0.134005	-4.23911	2.2441e-05	0.00188195	Naf1
ENSMUSG00000025946	-1.91506	0.45206	-4.23629	2.27244e-05	0.0018918	Pth2r
ENSMUSG00000064293	-1.89719	0.44791	-4.23566	2.27886e-05	0.0018918	Cntn4
ENSMUSG00000026321	-0.738645	0.174544	-4.23185	2.31776e-05	0.0019042	Tnfrsf11a
ENSMUSG00000034295	-0.480841	0.113652	-4.23081	2.32855e-05	0.0019042	Fhod3
ENSMUSG00000036760	-1.83317	0.433072	-4.23295	2.30649e-05	0.0019042	Kcnk9
ENSMUSG00000032502	-1.02884	0.24337	-4.22746	2.36344e-05	0.00192316	Stac
ENSMUSG00000028957	1.22167	0.289515	4.21973	2.44595e-05	0.0019805	Per3
ENSMUSG00000052560	-1.34592	0.319705	-4.20988	2.55503e-05	0.00205868	Cpne8
ENSMUSG00000032363	1.16956	0.278329	4.20208	2.64475e-05	0.00212057	Adamts7
ENSMUSG00000045083	-0.647459	0.15418	-4.19938	2.67651e-05	0.00213562	Lingo2
ENSMUSG00000020953	-0.432322	0.103026	-4.19626	2.71353e-05	0.0021547	Coch
ENSMUSG00000029467	-0.524008	0.125145	-4.1872	2.82416e-05	0.00222109	Atp2a2
ENSMUSG00000048978	-0.874895	0.208907	-4.18797	2.81461e-05	0.00222109	Nrsn1
ENSMUSG00000022103	-0.977151	0.233447	-4.18574	2.84238e-05	0.00222257	Gfra2
ENSMUSG00000026344	-1.16039	0.27728	-4.18489	2.85309e-05	0.00222257	Lypd1
ENSMUSG00000036356	-0.692239	0.165511	-4.18245	2.88389e-05	0.00223596	Csgalnact1
ENSMUSG00000038296	-1.41786	0.339158	-4.18052	2.90837e-05	0.00224436	Galntl4
ENSMUSG00000074622	0.990498	0.237182	4.17612	2.96526e-05	0.00227757	Mafb
ENSMUSG00000036192	-0.95994	0.230262	-4.1689	3.06067e-05	0.00233992	Rorb
ENSMUSG00000019997	-1.16718	0.28057	-4.16004	3.18196e-05	0.00242139	Ctgf
ENSMUSG00000043458	-0.766494	0.184415	-4.15636	3.23362e-05	0.00244936	Pcdhb12
ENSMUSG00000028519	-0.685034	0.165099	-4.14924	3.33577e-05	0.00251514	Dab1
ENSMUSG00000044042	0.732463	0.176678	4.14575	3.38704e-05	0.00254214	Fmn1
ENSMUSG00000021294	-1.19596	0.28887	-4.14013	3.47109e-05	0.00258165	Kif26a
ENSMUSG00000059203	-1.3804	0.333369	-4.14075	3.46166e-05	0.00258165	Il1rapl2
ENSMUSG00000063687	-0.54731	0.132484	-4.13113	3.60986e-05	0.00267276	Pcdhb5
ENSMUSG00000024805	-1.26158	0.305711	-4.12672	3.67977e-05	0.00270019	Pcgf5
ENSMUSG00000026576	-0.827646	0.200525	-4.1274	3.6689e-05	0.00270019	Atp1b1
ENSMUSG00000030064	0.856617	0.209178	4.09515	4.21887e-05	0.00308202	Frmd4b
ENSMUSG00000067578	-2.05061	0.501078	-4.0924	4.26936e-05	0.00310511	Cbln4
ENSMUSG00000021745	-0.589127	0.144113	-4.08796	4.35177e-05	0.0031511	Ptprg
ENSMUSG00000022026	1.4015	0.343635	4.07844	4.53393e-05	0.0032675	Olfm4
ENSMUSG00000027384	-0.407215	0.0998688	-4.0775	4.55228e-05	0.0032675	2310003L22Rik
ENSMUSG00000060534	-0.765094	0.18792	-4.07137	4.67369e-05	0.00334007	Dcc
ENSMUSG00000002190	0.765818	0.188626	4.05999	4.90753e-05	0.00347931	Clgn
ENSMUSG00000028909	-0.784521	0.19324	-4.05983	4.91087e-05	0.00347931	Ptpru
ENSMUSG00000020638	0.729032	0.179773	4.05529	5.00726e-05	0.00352556	Cmpk2
ENSMUSG00000021242	0.480001	0.11838	4.05474	5.01905e-05	0.00352556	Npc2
ENSMUSG00000031309	-0.705437	0.174102	-4.05187	5.08102e-05	0.00355391	Rps6ka3
ENSMUSG00000090061	-0.783697	0.194576	-4.02773	5.63192e-05	0.00392253	3110047P20Rik
ENSMUSG00000046159	-0.905242	0.224915	-4.02481	5.70207e-05	0.00395464	Chrm3
ENSMUSG00000055078	-1.38147	0.343842	-4.01775	5.87565e-05	0.0040579	Gabra5
ENSMUSG00000039765	0.770492	0.191847	4.01619	5.91465e-05	0.00406774	Cc2d2a
ENSMUSG00000051920	-1.15724	0.288458	-4.0118	6.02564e-05	0.00412681	Rspo2
ENSMUSG00000020620	0.67198	0.16779	4.00489	6.20471e-05	0.00423182	Abca8b
ENSMUSG00000022494	-1.34649	0.336398	-4.00268	6.26301e-05	0.00425393	Shisa9
ENSMUSG00000067786	-0.532893	0.133249	-3.99924	6.35469e-05	0.00429844	Nnat
ENSMUSG00000022382	-0.859437	0.215102	-3.99548	6.45623e-05	0.00434922	Wnt7b
ENSMUSG00000045657	-0.907062	0.227452	-3.98792	6.66559e-05	0.00447193	Pcdhb10
ENSMUSG00000027746	-0.439014	0.110303	-3.98007	6.88938e-05	0.00459917	Ufm1
ENSMUSG00000054640	-0.275647	0.0692698	-3.97932	6.9112e-05	0.00459917	Slc8a1
ENSMUSG00000050244	-0.415818	0.10453	-3.97799	6.95003e-05	0.00460636	Heatr1
ENSMUSG00000024308	0.719688	0.181242	3.97086	7.16138e-05	0.00472737	Tapbp
ENSMUSG00000028064	0.520918	0.13137	3.96526	7.33146e-05	0.00482029	Sema4a
ENSMUSG00000061311	1.53633	0.387819	3.96145	7.44958e-05	0.00487843	Rag1
ENSMUSG00000021224	-0.96976	0.244956	-3.95892	7.52896e-05	0.00491085	Numb
ENSMUSG00000047921	0.420646	0.106454	3.95144	7.76823e-05	0.00504301	Trappc9
ENSMUSG00000048878	0.613075	0.155182	3.95068	7.79293e-05	0.00504301	Hexim1
ENSMUSG00000026235	0.675975	0.171196	3.94855	7.8626e-05	0.00506814	Epha4
ENSMUSG00000020905	-0.817583	0.207279	-3.94437	8.0011e-05	0.00510503	Usp43
ENSMUSG00000030844	-0.996796	0.252737	-3.94401	8.013e-05	0.00510503	Rgs10
ENSMUSG00000090430	-0.942847	0.238951	-3.94577	7.95451e-05	0.00510503	Snhg4
ENSMUSG00000050541	-1.98672	0.504493	-3.93805	8.2148e-05	0.00521338	Adra1b
ENSMUSG00000028266	-0.730612	0.185704	-3.93428	8.34477e-05	0.0052755	Lmo4
ENSMUSG00000029765	-0.700431	0.17822	-3.93014	8.48957e-05	0.00532607	Plxna4
ENSMUSG00000040035	0.466256	0.118627	3.93043	8.47933e-05	0.00532607	Disp2
ENSMUSG00000022416	-0.675616	0.17196	-3.92891	8.5332e-05	0.00533309	Cacna1i
ENSMUSG00000037286	0.40646	0.103497	3.92727	8.59166e-05	0.00534928	Stag1
ENSMUSG00000048706	0.794054	0.202381	3.92356	8.7251e-05	0.00541186	D4Bwg0951e
ENSMUSG00000006930	1.00496	0.256365	3.92002	8.85419e-05	0.00547129	Hap1
ENSMUSG00000054477	-1.33958	0.342095	-3.91581	9.01023e-05	0.00554686	Kcnn2
ENSMUSG00000022324	1.06928	0.273202	3.91389	9.08209e-05	0.00557024	Matn2
ENSMUSG00000006442	-0.531443	0.136001	-3.90765	9.31972e-05	0.00569473	Srm
ENSMUSG00000020171	-0.516417	0.132369	-3.90134	9.56618e-05	0.00582368	Yeats4
ENSMUSG00000085795	-0.602181	0.154404	-3.90003	9.61797e-05	0.0058336	Zfp703
ENSMUSG00000032128	-2.60301	0.670893	-3.87991	0.000104495	0.00631465	Robo3
ENSMUSG00000054619	0.832775	0.214864	3.87582	0.000106264	0.00639803	Mettl7a1
ENSMUSG00000004637	0.567116	0.146364	3.87469	0.00010676	0.00640443	Wwox
ENSMUSG00000022021	0.82202	0.212206	3.87369	0.000107198	0.00640734	Diap3
ENSMUSG00000029822	-1.30542	0.337262	-3.87063	0.000108554	0.00646485	Osbpl3
ENSMUSG00000045287	-0.722004	0.187044	-3.86009	0.000113347	0.00672455	Rtn4rl1
ENSMUSG00000050505	-1.73114	0.448568	-3.85926	0.000113733	0.00672455	Pcdh20
ENSMUSG00000073805	-0.747079	0.193869	-3.85353	0.000116429	0.00685928	Fam196a
ENSMUSG00000022512	-2.89006	0.750947	-3.84855	0.000118818	0.00697502	Cldn1
ENSMUSG00000028737	0.501776	0.130466	3.84604	0.000120042	0.0070218	Aldh4a1
ENSMUSG00000029335	-0.930475	0.24278	-3.83258	0.000126807	0.00739123	Bmp3
ENSMUSG00000019916	-0.876714	0.229205	-3.82502	0.000130761	0.00759478	P4ha1
ENSMUSG00000020598	-0.479914	0.125801	-3.81485	0.000136263	0.00788647	Nrcam
ENSMUSG00000066129	0.465907	0.122269	3.8105	0.000138686	0.00799853	Kndc1
ENSMUSG00000026991	-0.447026	0.117376	-3.80849	0.000139817	0.00803558	Pkp4
ENSMUSG00000073594	-1.73369	0.455716	-3.80432	0.000142191	0.00814356	Gm10545
ENSMUSG00000044674	1.29517	0.34102	3.79793	0.000145907	0.00832733	Fzd1
ENSMUSG00000036158	-0.702336	0.185086	-3.79464	0.000147859	0.00840953	Prickle1
ENSMUSG00000050248	1.19032	0.314191	3.78853	0.000151542	0.00858928	Evc2
ENSMUSG00000016382	-0.534976	0.141413	-3.78307	0.000154908	0.00874989	Pls3
ENSMUSG00000063260	-1.74061	0.460212	-3.78219	0.000155457	0.00875087	Syt10
ENSMUSG00000034021	-0.532147	0.140861	-3.77781	0.000158214	0.00887562	Pds5b
ENSMUSG00000027977	-1.21571	0.321975	-3.77578	0.000159508	0.00891777	Ndst3
ENSMUSG00000029483	-1.06871	0.283338	-3.77187	0.000162032	0.00902819	Tmem132b
ENSMUSG00000040016	-0.685032	0.181784	-3.76839	0.000164306	0.00912399	Ptger3
ENSMUSG00000032109	1.04714	0.278404	3.76121	0.000169092	0.00935816	Nlrx1
ENSMUSG00000025425	-0.883586	0.235892	-3.74571	0.000179882	0.00992189	St8sia5
ENSMUSG00000003184	0.970098	0.25912	3.74383	0.00018124	0.00993012	Irf3
ENSMUSG00000020052	-1.36203	0.363744	-3.74448	0.000180768	0.00993012	Ascl1
ENSMUSG00000060988	-0.482983	0.12909	-3.74144	0.000182971	0.00999167	Galnt13
ENSMUSG00000028019	-1.08859	0.291246	-3.73768	0.000185723	0.0101084	Pdgfc
ENSMUSG00000048756	0.487129	0.130786	3.72463	0.000195601	0.0106108	Foxo3
ENSMUSG00000092033	-0.973987	0.261605	-3.72313	0.000196771	0.0106393	A730056A06Rik
ENSMUSG00000023800	-0.468928	0.126022	-3.72101	0.000198425	0.0106898	Tiam2
ENSMUSG00000056025	1.49462	0.40175	3.72027	0.000199007	0.0106898	Clca1
ENSMUSG00000025289	-0.692571	0.186248	-3.71854	0.000200375	0.0107146	Prdx4
ENSMUSG00000025995	-0.341699	0.0919028	-3.71804	0.000200772	0.0107146	Wdr75
ENSMUSG00000026509	0.263405	0.0709985	3.71	0.000207258	0.010954	Capn2
ENSMUSG00000032743	0.500394	0.134853	3.71068	0.000206705	0.010954	D430042O09Rik
ENSMUSG00000056267	0.618764	0.166719	3.71142	0.0002061	0.010954	Cep70
ENSMUSG00000007682	-1.78173	0.48047	-3.7083	0.000208654	0.0109924	Dio2
ENSMUSG00000039385	-0.663466	0.179129	-3.70384	0.00021236	0.0111519	Cdh6
ENSMUSG00000005774	0.521592	0.140912	3.70155	0.00021429	0.0111937	Rfx5
ENSMUSG00000035919	0.456887	0.12344	3.70128	0.000214518	0.0111937	Bbs9
ENSMUSG00000090433	0.845657	0.228725	3.69727	0.000217932	0.0113359	9430037G07Rik
ENSMUSG00000045094	1.07885	0.292058	3.69396	0.000220789	0.0114483	Arhgef37
ENSMUSG00000044461	-0.96797	0.262112	-3.69296	0.000221656	0.0114571	Shisa2
ENSMUSG00000026347	-0.780556	0.211653	-3.6879	0.000226115	0.0116509	Tmem163
ENSMUSG00000025658	-0.749808	0.20343	-3.68582	0.000227967	0.0116756	Cnksr2
ENSMUSG00000048988	-1.13816	0.3088	-3.68577	0.000228015	0.0116756	Elfn1
ENSMUSG00000037935	-0.282724	0.0768921	-3.67689	0.000236094	0.0120518	Smarce1
ENSMUSG00000025582	-1.4616	0.397677	-3.67534	0.000237537	0.0120879	Nptx1
ENSMUSG00000035606	0.977092	0.266093	3.672	0.000240663	0.0122092	Ky
ENSMUSG00000019647	-1.08721	0.296709	-3.66421	0.000248101	0.0125478	Sema6a
ENSMUSG00000053399	1.33703	0.365257	3.66051	0.000251714	0.0126915	Adamts18
ENSMUSG00000028434	0.483889	0.13232	3.65695	0.000255237	0.0127906	Epb4.1l4b
ENSMUSG00000092448	-1.14317	0.312575	-3.65727	0.000254919	0.0127906	Gm20387
ENSMUSG00000090769	0.795485	0.217644	3.65499	0.000257194	0.0128495	Gm2824
ENSMUSG00000026988	0.92905	0.255063	3.64244	0.000270065	0.0133802	Wdsub1
ENSMUSG00000036264	-1.60597	0.440927	-3.64226	0.000270258	0.0133802	Fstl4
ENSMUSG00000044770	0.710947	0.195175	3.64261	0.000269891	0.0133802	Scml4
ENSMUSG00000061731	-0.488074	0.134048	-3.64105	0.000271526	0.0134026	Ext1
ENSMUSG00000039908	1.03486	0.28438	3.63901	0.000273686	0.0134688	Slc26a11
ENSMUSG00000020123	-1.3936	0.383198	-3.63676	0.00027609	0.0135275	Avpr1a
ENSMUSG00000021943	-1.4659	0.403209	-3.63559	0.000277349	0.0135275	Gdf10
ENSMUSG00000047643	-1.22196	0.336044	-3.63632	0.000276563	0.0135275	Gm5454
ENSMUSG00000028101	0.418778	0.115235	3.63414	0.000278913	0.0135636	Pias3
ENSMUSG00000018362	-0.389634	0.107317	-3.63068	0.000282678	0.0137061	Kpna2
ENSMUSG00000045761	1.75038	0.483599	3.61948	0.000295196	0.014271	Fam179a
ENSMUSG00000023988	-0.396262	0.109515	-3.61834	0.000296494	0.0142917	Bysl
ENSMUSG00000057604	0.825524	0.228283	3.61623	0.000298928	0.0143669	Lmcd1
ENSMUSG00000038910	-0.319844	0.0885032	-3.61393	0.000301587	0.0144524	Plcl2
ENSMUSG00000027495	0.931241	0.258061	3.6086	0.000307851	0.0147098	2010011I20Rik
ENSMUSG00000051323	-0.541052	0.15007	-3.60533	0.000311754	0.014853	Pcdh19
ENSMUSG00000045071	0.593828	0.16484	3.60245	0.000315229	0.0149752	E130308A19Rik
ENSMUSG00000046182	-1.2218	0.33928	-3.60116	0.000316801	0.0150065	Gsg1l
ENSMUSG00000041112	-0.950766	0.264097	-3.60007	0.000318133	0.0150263	Elmo1
ENSMUSG00000005958	-0.927933	0.258573	-3.58868	0.000332362	0.0156534	Ephb3
ENSMUSG00000026090	-0.778463	0.217461	-3.57978	0.000343882	0.0161497	2010300C02Rik
ENSMUSG00000031015	-1.08031	0.302265	-3.57404	0.000351517	0.0164145	Swap70
ENSMUSG00000050321	-1.05234	0.294429	-3.57416	0.000351358	0.0164145	Neto1
ENSMUSG00000046999	-1.28737	0.360484	-3.57122	0.000355328	0.0165454	1110032F04Rik
ENSMUSG00000027777	-0.472777	0.132575	-3.56611	0.000362319	0.0168232	Schip1
ENSMUSG00000027777	-0.472777	0.132575	-3.56611	0.000362319	0.0168232	Schip1
ENSMUSG00000026527	-0.748589	0.210126	-3.56258	0.000367232	0.0170034	Rgs7
ENSMUSG00000030226	-0.398855	0.112031	-3.56021	0.000370558	0.0171035	Lmo3
ENSMUSG00000041261	-1.64695	0.462698	-3.55946	0.000371624	0.0171035	Car8
ENSMUSG00000054555	-0.814787	0.228995	-3.55809	0.000373558	0.0171035	Adam12
ENSMUSG00000087413	1.09416	0.307452	3.55879	0.000372567	0.0171035	Gm11266
ENSMUSG00000024151	0.54399	0.152983	3.55588	0.000376722	0.0172005	Msh2
ENSMUSG00000045689	-0.891593	0.250896	-3.55364	0.000379937	0.0172993	Pcdhb4
ENSMUSG00000034755	-1.06142	0.298898	-3.5511	0.000383626	0.017419	Pcdh11x
ENSMUSG00000030607	-2.09104	0.589296	-3.54838	0.000387612	0.0175515	Acan
ENSMUSG00000051663	0.999976	0.282951	3.5341	0.000409173	0.0184769	Pcdhb1
ENSMUSG00000040033	0.565285	0.160119	3.53041	0.000414912	0.0186847	Stat2
ENSMUSG00000045275	1.31747	0.373596	3.52646	0.000421161	0.0188627	Lca5l
ENSMUSG00000056258	-0.716768	0.203242	-3.52668	0.000420811	0.0188627	Kcnq3
ENSMUSG00000026383	0.51363	0.145878	3.52096	0.000429988	0.0191537	Epb4.1l5
ENSMUSG00000037649	0.666488	0.189263	3.52149	0.000429123	0.0191537	H2-DMa
ENSMUSG00000031838	0.530958	0.151028	3.51563	0.000438709	0.0194894	Ifi30
ENSMUSG00000031647	-0.95838	0.272802	-3.5131	0.000442913	0.0195703	Mfap3l
ENSMUSG00000032563	-0.300428	0.0855058	-3.51354	0.000442171	0.0195703	Mrpl3
ENSMUSG00000019814	-0.469438	0.133842	-3.50741	0.000452499	0.0199403	Ltv1
ENSMUSG00000041688	0.64177	0.183231	3.50251	0.000460892	0.0202018	Amot
ENSMUSG00000052353	-0.747944	0.213525	-3.50284	0.00046033	0.0202018	9930013L23Rik
ENSMUSG00000025743	-0.280873	0.0803491	-3.49566	0.000472886	0.020619	Sdc3
ENSMUSG00000030092	-0.853505	0.244162	-3.49564	0.00047292	0.020619	Cntn6
ENSMUSG00000046613	0.720869	0.20657	3.4897	0.000483561	0.0210272	Vwa5b2
ENSMUSG00000029328	-0.420601	0.120562	-3.48867	0.000485433	0.0210529	Hnrpdl
ENSMUSG00000049969	0.613522	0.175943	3.48705	0.000488386	0.0211252	Plekhf2
ENSMUSG00000024679	4.06337	1.16601	3.48484	0.00049243	0.0212443	Ms4a6d
ENSMUSG00000054986	0.619632	0.17813	3.47855	0.000504144	0.0216927	Sec14l3
ENSMUSG00000040272	0.951701	0.273647	3.47784	0.000505469	0.0216929	Accs
ENSMUSG00000034612	-0.456322	0.131341	-3.47432	0.000512147	0.0219223	Chst11
ENSMUSG00000026833	-0.373932	0.107714	-3.47153	0.000517498	0.0220366	Olfm1
ENSMUSG00000027630	-0.450541	0.129765	-3.47199	0.00051661	0.0220366	Tbl1xr1
ENSMUSG00000021240	0.632783	0.182338	3.47039	0.000519698	0.0220731	Abcd4
ENSMUSG00000087275	0.871336	0.251268	3.46776	0.000524824	0.0222333	1110002J07Rik
ENSMUSG00000020707	1.33755	0.386671	3.45915	0.000541887	0.0228972	Rnf135
ENSMUSG00000020375	0.422897	0.122495	3.45236	0.000555714	0.0234113	Rufy1
ENSMUSG00000034488	-0.697007	0.201927	-3.45178	0.000556904	0.0234113	Edil3
ENSMUSG00000039620	-1.10423	0.320369	-3.44673	0.000567412	0.0237922	6430573F11Rik
ENSMUSG00000021721	-1.26813	0.368367	-3.44257	0.000576204	0.0240994	Htr1a
ENSMUSG00000034981	-1.03039	0.299377	-3.4418	0.00057786	0.0241073	Parm1
ENSMUSG00000000632	-0.459539	0.133595	-3.43978	0.000582193	0.0241654	Sez6
ENSMUSG00000030898	-1.31357	0.381821	-3.44028	0.000581116	0.0241654	Cckbr
ENSMUSG00000085685	1.43433	0.417759	3.43338	0.000596098	0.0246802	Gm15253
ENSMUSG00000031618	-1.0558	0.307685	-3.43142	0.000600429	0.0247971	Nr3c2
ENSMUSG00000023912	0.538117	0.156948	3.42862	0.000606654	0.0248049	Slc25a27
ENSMUSG00000028194	-0.507088	0.147831	-3.4302	0.000603144	0.0248049	Ddah1
ENSMUSG00000041695	-1.13007	0.329576	-3.42886	0.000606117	0.0248049	Kcnj2
ENSMUSG00000053024	0.466736	0.136129	3.42863	0.000606632	0.0248049	Cntn2
ENSMUSG00000030302	-0.356446	0.10402	-3.42671	0.000610931	0.0248682	Atp2b2
ENSMUSG00000034771	0.514543	0.150162	3.42658	0.000611227	0.0248682	Tle2
ENSMUSG00000033350	-0.775631	0.226513	-3.42423	0.000616552	0.0250229	Chst2
ENSMUSG00000038244	-0.766608	0.223943	-3.42323	0.00061881	0.0250527	Mical2
ENSMUSG00000035357	-1.20685	0.352965	-3.41917	0.000628128	0.0253053	Pdzrn3
ENSMUSG00000054165	2.06617	0.60421	3.41962	0.000627082	0.0253053	4922502B01Rik
ENSMUSG00000025094	-1.93543	0.566859	-3.41431	0.000639445	0.0256483	Slc18a2
ENSMUSG00000040372	-0.867441	0.254071	-3.41417	0.000639765	0.0256483	Gpr63
ENSMUSG00000050587	-0.959893	0.281828	-3.40595	0.000659343	0.0263689	Lrrc4c
ENSMUSG00000063887	-0.854909	0.251408	-3.40048	0.000672669	0.0268366	Nlgn1
ENSMUSG00000040452	-0.804433	0.236767	-3.39758	0.000679848	0.026992	Cdh12
ENSMUSG00000084898	-0.986491	0.290314	-3.39802	0.000678756	0.026992	Gm12371
ENSMUSG00000002228	-1.49788	0.441261	-3.39454	0.000687431	0.0272272	Ppm1j
ENSMUSG00000048915	-1.46221	0.431451	-3.38905	0.000701355	0.0277119	Efna5
ENSMUSG00000033342	-0.683193	0.201683	-3.38746	0.000705441	0.0278065	4833424O15Rik
ENSMUSG00000028698	0.691211	0.204354	3.38241	0.000718519	0.0282543	Pik3r3
ENSMUSG00000038156	-0.943965	0.279388	-3.37869	0.000728321	0.0285714	Spon1
ENSMUSG00000022114	-0.957424	0.283765	-3.37401	0.000740818	0.02893	Spry2
ENSMUSG00000074892	1.20118	0.356016	3.37395	0.000740983	0.02893	B3galt5
ENSMUSG00000033177	1.05797	0.313904	3.37035	0.000750739	0.0292415	Tmprss7
ENSMUSG00000044043	-0.776196	0.230421	-3.36859	0.000755528	0.0293584	Pcdhb14
ENSMUSG00000035131	-0.809028	0.24045	-3.36464	0.000766424	0.0297116	Fam5c
ENSMUSG00000031298	-0.981321	0.291913	-3.36169	0.000774673	0.0299607	Gpr64
ENSMUSG00000032017	-0.555992	0.165914	-3.35108	0.000804963	0.0310591	Grik4
ENSMUSG00000070047	-1.34392	0.401437	-3.34777	0.000814656	0.0313595	Fat1
ENSMUSG00000039539	-1.00447	0.300135	-3.34673	0.000817696	0.031403	Sgcz
ENSMUSG00000026312	-0.642559	0.192048	-3.34582	0.000820391	0.0314095	Cdh7
ENSMUSG00000079037	0.755685	0.225889	3.34538	0.000821687	0.0314095	Prnp
ENSMUSG00000057329	-0.447752	0.133917	-3.3435	0.000827287	0.0315501	Bcl2
ENSMUSG00000039911	-0.896356	0.269014	-3.332	0.000862245	0.0328072	Spsb1
ENSMUSG00000024750	-0.480437	0.144313	-3.32913	0.000871182	0.0330653	Zfand5
ENSMUSG00000027395	-0.427883	0.128559	-3.32831	0.000873759	0.0330653	Polr1b
ENSMUSG00000063704	0.733543	0.220423	3.32789	0.000875062	0.0330653	Mapk15
ENSMUSG00000017737	1.16385	0.349967	3.32561	0.000882268	0.0332247	Mmp9
ENSMUSG00000026489	1.02856	0.309317	3.32527	0.000883323	0.0332247	Adck3
ENSMUSG00000026249	-0.81448	0.24508	-3.32332	0.000889522	0.0333815	Serpine2
ENSMUSG00000051236	1.29158	0.388953	3.32066	0.000898062	0.0335487	Msrb3
ENSMUSG00000055202	0.84924	0.255734	3.3208	0.000897599	0.0335487	Zfp811
ENSMUSG00000037531	-0.493614	0.148787	-3.31759	0.000907989	0.0338427	Mrpl47
ENSMUSG00000074939	1.10615	0.333538	3.31642	0.000911788	0.0339074	Chrm5
ENSMUSG00000056515	0.406025	0.122472	3.31524	0.000915635	0.0339736	Rab31
ENSMUSG00000036545	-0.988256	0.298577	-3.30988	0.000933348	0.0345528	Adamts2
ENSMUSG00000028351	-0.983597	0.297282	-3.30864	0.00093751	0.0346289	Dbc1
ENSMUSG00000028883	-0.577693	0.174694	-3.30688	0.000943406	0.0347685	Sema3a
ENSMUSG00000029344	-0.537387	0.162602	-3.30492	0.000950027	0.0349342	Tpst2
ENSMUSG00000060371	-0.482243	0.146056	-3.30177	0.000960764	0.0352502	Caln1
ENSMUSG00000045382	-0.960442	0.291181	-3.29844	0.000972248	0.0355921	Cxcr4
ENSMUSG00000028444	0.359382	0.109017	3.29657	0.000978721	0.0357494	Cntfr
ENSMUSG00000021417	0.497712	0.151391	3.28759	0.0010105	0.0365529	Eci2
ENSMUSG00000027419	-0.681194	0.207075	-3.2896	0.00100329	0.0365529	Pcsk2
ENSMUSG00000034919	1.12549	0.342448	3.2866	0.00101406	0.0365529	Ttc22
ENSMUSG00000037211	-1.40192	0.426495	-3.28707	0.00101237	0.0365529	Spry1
ENSMUSG00000053141	-0.711129	0.216338	-3.28712	0.00101219	0.0365529	Ptprt
ENSMUSG00000073421	-1.24012	0.377275	-3.28705	0.00101244	0.0365529	H2-Ab1
ENSMUSG00000041540	-0.472059	0.143753	-3.28381	0.00102413	0.0368349	Sox5
ENSMUSG00000048138	-1.6054	0.490126	-3.2755	0.00105477	0.0378542	Dmrt2
ENSMUSG00000093650	1.40524	0.429781	3.26967	0.00107674	0.0385585
ENSMUSG00000004562	0.643538	0.197251	3.26253	0.00110424	0.0394575	Arhgef40
ENSMUSG00000039936	0.451976	0.138657	3.25966	0.00111544	0.0397713	Pik3cd
ENSMUSG00000034330	1.31286	0.403516	3.25356	0.00113968	0.0404599	Plcg2
ENSMUSG00000038332	0.596317	0.183252	3.25408	0.00113759	0.0404599	Sesn1
ENSMUSG00000006800	-0.971139	0.29905	-3.24741	0.00116459	0.0411664	Sulf2
ENSMUSG00000009216	-0.47582	0.14651	-3.2477	0.00116344	0.0411664	Fam163b
ENSMUSG00000040254	-0.983374	0.302924	-3.24627	0.00116927	0.0412432	Sema3d
ENSMUSG00000078429	-0.401198	0.123744	-3.24218	0.00118621	0.0417511	Ctdsp2
ENSMUSG00000066307	1.00036	0.308756	3.23996	0.00119548	0.0419876	Rad54b
ENSMUSG00000034912	-0.312988	0.0966845	-3.23721	0.00120705	0.0421237	Mdga2
ENSMUSG00000036298	-0.6189	0.191123	-3.23822	0.00120277	0.0421237	Slc2a13
ENSMUSG00000067279	-1.29758	0.4008	-3.23749	0.00120587	0.0421237	Ppp1r3c
ENSMUSG00000001143	0.396316	0.12257	3.23339	0.0012233	0.0426003	Lman2l
ENSMUSG00000033717	-0.580015	0.179441	-3.23234	0.00122781	0.042667	Adra2a
ENSMUSG00000026670	-0.485068	0.15038	-3.2256	0.00125707	0.0435916	Uap1
ENSMUSG00000024558	-0.572422	0.177665	-3.22192	0.00127334	0.0439159	Mapk4
ENSMUSG00000027968	-0.485581	0.150723	-3.22168	0.00127444	0.0439159	Larp7
ENSMUSG00000028383	0.628084	0.194931	3.22208	0.00127263	0.0439159	Hsdl2
ENSMUSG00000033960	-0.771332	0.23949	-3.22073	0.00127865	0.0439691	9430020K01Rik
ENSMUSG00000026687	0.392641	0.121978	3.21896	0.00128657	0.0440773	Aldh9a1
ENSMUSG00000047193	0.275968	0.0857356	3.21883	0.00128716	0.0440773	Dync2h1
ENSMUSG00000019970	-0.799051	0.248335	-3.21764	0.00129251	0.0441685	Sgk1
ENSMUSG00000007817	-0.534087	0.166023	-3.21694	0.00129564	0.0441835	Zmiz1
ENSMUSG00000021765	-1.66581	0.518408	-3.21333	0.00131207	0.0446511	Fst
ENSMUSG00000056222	-0.476492	0.148327	-3.21244	0.00131614	0.0446969	Spock1
ENSMUSG00000027076	-0.577326	0.180089	-3.20578	0.00134695	0.0456492	Timm10
ENSMUSG00000007050	-0.504144	0.157384	-3.20328	0.00135873	0.0457679	Lsm2
ENSMUSG00000021680	-1.64243	0.512729	-3.20332	0.00135854	0.0457679	Crhbp
ENSMUSG00000032527	0.366362	0.114384	3.20291	0.00136048	0.0457679	Pccb
ENSMUSG00000056755	-0.80827	0.252374	-3.20267	0.00136159	0.0457679	Grm7
ENSMUSG00000038712	0.421825	0.131896	3.19815	0.0013831	0.0463961	Fam63a
ENSMUSG00000042807	-0.634925	0.198699	-3.19541	0.0013963	0.0467434	Hecw2
ENSMUSG00000003316	0.198253	0.0621042	3.19227	0.00141161	0.0471597	Glg1
ENSMUSG00000042846	-0.890748	0.279313	-3.18907	0.00142729	0.0475871	Lrrtm3
ENSMUSG00000027332	0.468527	0.14701	3.18703	0.00143739	0.0477302	Ivd
ENSMUSG00000028261	-0.587371	0.184297	-3.18708	0.00143717	0.0477302	Ndufaf4
ENSMUSG00000071708	-0.421373	0.132268	-3.18576	0.00144376	0.047845	Sms
ENSMUSG00000071708	-0.421373	0.132268	-3.18576	0.00144376	0.047845	Sms
ENSMUSG00000001891	-0.566664	0.177922	-3.18491	0.001448	0.0478888	Ugp2
ENSMUSG00000044548	-0.679123	0.213295	-3.18395	0.00145278	0.0479504	Dact1
ENSMUSG00000019947	0.554016	0.174084	3.18245	0.00146033	0.0480069	Arid5b
ENSMUSG00000024924	-0.458394	0.144031	-3.18262	0.0014595	0.0480069	Vldlr
ENSMUSG00000042429	-0.654314	0.205721	-3.18059	0.00146978	0.048221	Adora1
ENSMUSG00000017692	0.759161	0.239072	3.17545	0.00149603	0.048406	Rhbdl3
ENSMUSG00000024397	0.695597	0.218848	3.17845	0.00148066	0.048406	Aif1
ENSMUSG00000031442	0.338912	0.106693	3.1765	0.00149063	0.048406	Mcf2l
ENSMUSG00000036617	-0.64605	0.203295	-3.1779	0.00148348	0.048406	Etl4
ENSMUSG00000055447	-0.511203	0.160888	-3.17738	0.0014861	0.048406	Cd47
ENSMUSG00000071588	2.86683	0.902329	3.17714	0.00148735	0.048406	Gm10338
ENSMUSG00000091024	1.72682	0.543743	3.1758	0.00149426	0.048406	Gm17351
ENSMUSG00000046844	0.383765	0.121041	3.17053	0.00152161	0.0491369	Vat1l
ENSMUSG00000086921	1.361	0.429951	3.16548	0.00154827	0.0498999	Gm13189
ENSMUSG00000027355	1.33589	0.422196	3.16416	0.00155532	0.0500277	Tmco5
ENSMUSG00000031530	-1.68915	0.533933	-3.1636	0.00155832	0.0500277	Dusp4
ENSMUSG00000057715	-0.747833	0.236474	-3.16244	0.00156455	0.0501296	A830018L16Rik
ENSMUSG00000032601	-0.472843	0.149702	-3.15856	0.0015855	0.0507021	Prkar2a
ENSMUSG00000059810	0.477599	0.151337	3.15586	0.00160027	0.051075	Rgs3
ENSMUSG00000056735	0.959197	0.304407	3.15103	0.00162695	0.0517387	A930024E05Rik
ENSMUSG00000070498	-1.01793	0.323055	-3.15096	0.00162736	0.0517387	Tmem132b
ENSMUSG00000022009	-0.436737	0.138748	-3.1477	0.0016456	0.0522176	Nufip1
ENSMUSG00000035769	0.69093	0.219553	3.14699	0.0016496	0.0522437	Xylb
ENSMUSG00000022307	-0.616212	0.195901	-3.14552	0.00165789	0.0522695	Oxr1
ENSMUSG00000025810	-0.809607	0.257381	-3.14556	0.00165769	0.0522695	Nrp1
ENSMUSG00000060038	-0.375324	0.119334	-3.14516	0.00165995	0.0522695	Dhps
ENSMUSG00000034708	0.521324	0.165798	3.14434	0.00166462	0.0523162	Grn
ENSMUSG00000028207	-0.450216	0.143245	-3.14298	0.00167239	0.0524599	Asph
ENSMUSG00000001017	-0.362419	0.115355	-3.14177	0.0016793	0.0525765	2500003M10Rik
ENSMUSG00000030254	-0.429962	0.136922	-3.1402	0.00168835	0.0527593	Rad18
ENSMUSG00000006711	0.698974	0.222737	3.13811	0.00170043	0.0530266	D130043K22Rik
ENSMUSG00000020075	-0.525592	0.167514	-3.1376	0.00170335	0.0530266	Ddx21
ENSMUSG00000015776	0.393446	0.125606	3.13238	0.00173397	0.0537759	Med22
ENSMUSG00000060961	-0.963379	0.307514	-3.1328	0.0017315	0.0537759	Slc4a4
ENSMUSG00000071324	0.575911	0.183998	3.12999	0.00174811	0.0541124	Armc2
ENSMUSG00000000531	-0.997421	0.318861	-3.12807	0.00175957	0.0543648	Grasp
ENSMUSG00000085386	1.19838	0.383369	3.12591	0.00177256	0.0546632	Gm13630
ENSMUSG00000029311	0.660345	0.211732	3.11878	0.00181599	0.0557933	Hsd17b11
ENSMUSG00000040560	0.335604	0.107599	3.11902	0.00181453	0.0557933	Wdr7
ENSMUSG00000034297	-0.509107	0.163313	-3.11737	0.00182471	0.0559566	Med13
ENSMUSG00000020601	-0.616897	0.198012	-3.11545	0.00183662	0.056217	Trib2
ENSMUSG00000034037	0.72426	0.232731	3.112	0.00185823	0.0567175	Fgd5
ENSMUSG00000037031	0.875152	0.281242	3.11174	0.00185987	0.0567175	Tspan15
ENSMUSG00000028729	-0.439795	0.141417	-3.10992	0.00187136	0.0569621	Ebna1bp2
ENSMUSG00000092558	0.52569	0.169214	3.10667	0.0018921	0.0574869	Med20
ENSMUSG00000035469	0.45623	0.146902	3.10568	0.0018984	0.057572	Rcbtb1
ENSMUSG00000030662	-0.465056	0.149849	-3.10349	0.00191251	0.0578894	Ipo5
ENSMUSG00000032437	-0.350289	0.112893	-3.10285	0.00191667	0.0578894	Stt3b
ENSMUSG00000058317	-0.54441	0.175479	-3.10242	0.00191943	0.0578894	Ube2e2
ENSMUSG00000024533	-0.317391	0.102374	-3.10031	0.00193316	0.0581142	Spire1
ENSMUSG00000031210	0.732486	0.236271	3.10019	0.00193396	0.0581142	Gpr165
ENSMUSG00000039089	-0.64206	0.207333	-3.09676	0.00195649	0.0586841	L3mbtl3
ENSMUSG00000022285	-0.295345	0.0954119	-3.09547	0.00196499	0.0588315	Ywhaz
ENSMUSG00000050164	-0.854073	0.276029	-3.09414	0.00197382	0.0589885	Mchr1
ENSMUSG00000034659	-0.577644	0.18674	-3.09331	0.00197938	0.0590473	Tmem109
ENSMUSG00000032323	1.24948	0.404515	3.08884	0.00200938	0.0598337	Cyp11a1
ENSMUSG00000051855	-0.792837	0.256805	-3.08731	0.00201978	0.0599262	Mest
ENSMUSG00000092905	1.73946	0.5634	3.08744	0.00201889	0.0599262
ENSMUSG00000055660	-0.506134	0.16418	-3.0828	0.00205065	0.0607326	Mettl4
ENSMUSG00000005534	0.282162	0.0915695	3.0814	0.00206027	0.0608426	Insr
ENSMUSG00000091971	0.907139	0.294412	3.08119	0.00206177	0.0608426	Hspa1a
ENSMUSG00000039630	-0.284257	0.0923145	-3.07923	0.00207539	0.0611346	Hnrnpu
ENSMUSG00000024085	-0.498827	0.162275	-3.07397	0.00211233	0.0621116	Man2a1
ENSMUSG00000073207	0.929222	0.302479	3.07202	0.00212615	0.0624064	Ccdc160
ENSMUSG00000045876	-0.473978	0.154433	-3.06914	0.00214675	0.0628985	Pcdhb8
ENSMUSG00000073469	0.608838	0.198428	3.0683	0.00215281	0.0629639	Rnaset2a
ENSMUSG00000073469	0.608838	0.198428	3.0683	0.00215281	0.0629639	Rnaset2a
ENSMUSG00000062859	1.03325	0.336933	3.06663	0.0021649	0.0632049	Tcp11
ENSMUSG00000022300	-0.248881	0.0813954	-3.05767	0.00223061	0.0650082	Dcaf13
ENSMUSG00000032501	-1.02572	0.335734	-3.05516	0.0022494	0.0651382	Trib1
ENSMUSG00000033581	-0.991235	0.32458	-3.0539	0.00225886	0.0651382	Igf2bp2
ENSMUSG00000042354	-0.347903	0.113904	-3.05437	0.00225535	0.0651382	Gnl3
ENSMUSG00000045648	-1.15181	0.37687	-3.05625	0.00224122	0.0651382	Vwc2l
ENSMUSG00000051599	-0.547559	0.179206	-3.05547	0.00224708	0.0651382	Pcdhb2
ENSMUSG00000069729	-0.410737	0.134465	-3.05459	0.00225368	0.0651382	Arid1b
ENSMUSG00000038697	-0.325015	0.106529	-3.05096	0.0022811	0.0656644	Taf5l
ENSMUSG00000042082	0.418708	0.137372	3.04798	0.00230388	0.0662044	Arsb
ENSMUSG00000031841	-0.464637	0.152577	-3.04526	0.00232477	0.066688	Cdh13
ENSMUSG00000026582	-2.60529	0.855718	-3.04457	0.00233013	0.0667253	Sele
ENSMUSG00000045613	-1.454	0.477701	-3.04375	0.00233647	0.0667906	Chrm2
ENSMUSG00000028995	0.37454	0.123218	3.03966	0.00236843	0.0673527	Fam126a
ENSMUSG00000037362	-0.701747	0.23083	-3.04011	0.00236491	0.0673527	Nov
ENSMUSG00000056018	2.7685	0.910547	3.04048	0.00236203	0.0673527	1700008F21Rik
ENSMUSG00000087301	1.79948	0.592281	3.03823	0.00237976	0.067558	Gm13629
ENSMUSG00000038510	-0.541878	0.178434	-3.03686	0.00239057	0.067748	Rpf2
ENSMUSG00000027291	0.289237	0.0952843	3.03552	0.00240124	0.0679027	Vps39
ENSMUSG00000091994	-0.55524	0.182938	-3.03513	0.00240429	0.0679027	E130317F20Rik
ENSMUSG00000021759	0.423261	0.139508	3.03396	0.00241365	0.0679943	Ppap2a
ENSMUSG00000032905	0.376916	0.124243	3.03369	0.00241581	0.0679943	Atg12
ENSMUSG00000045594	0.407474	0.134418	3.0314	0.00243425	0.0683962	Glb1
ENSMUSG00000031758	0.406227	0.134261	3.02565	0.00248098	0.0694716	Cdyl2
ENSMUSG00000057963	-0.317536	0.104944	-3.02576	0.00248008	0.0694716	Itpk1
ENSMUSG00000026109	-0.328172	0.108564	-3.02284	0.00250412	0.0698816	Tmeff2
ENSMUSG00000057554	0.480723	0.159008	3.02326	0.00250066	0.0698816	Lgals8
ENSMUSG00000018040	-0.307795	0.101843	-3.02224	0.00250915	0.0699031	Rrp7a
ENSMUSG00000073209	-2.34446	0.776035	-3.02107	0.00251881	0.0700537	Klf14
ENSMUSG00000021477	0.316358	0.104844	3.01741	0.00254944	0.0707858	Ctsl
ENSMUSG00000047307	-0.626149	0.207585	-3.01635	0.00255838	0.0709141	Pcdhb13
ENSMUSG00000043241	0.586641	0.194706	3.01296	0.00258716	0.071591	Upf2
ENSMUSG00000030638	0.409444	0.135921	3.01237	0.00259214	0.0716083	Sh3gl3
ENSMUSG00000026360	-1.17505	0.390163	-3.01169	0.00259797	0.0716492	Rgs2
ENSMUSG00000020701	0.761604	0.253062	3.00955	0.00261634	0.0720348	Tmem132e
ENSMUSG00000044689	0.992057	0.329699	3.00898	0.00262128	0.07205	Gm13749
ENSMUSG00000047747	0.317134	0.105465	3.00699	0.00263844	0.0723522	Rnf150
ENSMUSG00000060275	0.608165	0.202271	3.00669	0.00264107	0.0723522	Nrg2
ENSMUSG00000030098	0.304839	0.101567	3.00135	0.00268787	0.0735117	Grip2
ENSMUSG00000025314	-0.292319	0.0974983	-2.9982	0.00271583	0.074153	Ptprj
ENSMUSG00000039252	-0.711836	0.23764	-2.99543	0.00274054	0.0747035	Lgi2
ENSMUSG00000059361	0.498762	0.166561	2.99446	0.00274928	0.0748176	Nrsn2
ENSMUSG00000027965	-0.733646	0.245069	-2.99363	0.00275683	0.0748991	Olfm3
ENSMUSG00000058740	0.499153	0.166842	2.99177	0.00277369	0.075233	Kcnt1
ENSMUSG00000074873	0.52198	0.174522	2.9909	0.00278154	0.0753215	AI606181
ENSMUSG00000042997	-0.352045	0.117803	-2.98841	0.00280436	0.0758145	Nhlrc3
ENSMUSG00000027207	0.424812	0.142211	2.98718	0.0028156	0.0759934	Galk2
ENSMUSG00000022370	0.432399	0.145308	2.97575	0.00292271	0.078755	Mrpl13
ENSMUSG00000019303	-0.863258	0.290292	-2.97376	0.00294178	0.0790538	Psmc3ip
ENSMUSG00000036964	0.842305	0.283262	2.97359	0.00294342	0.0790538	Trim17
ENSMUSG00000028373	-0.850386	0.286058	-2.97277	0.00295127	0.0791353	Astn2
ENSMUSG00000048126	1.02153	0.34372	2.97199	0.00295878	0.0792077	Col6a3
ENSMUSG00000089958	1.04875	0.353019	2.97082	0.00297008	0.0793808	Gm16165
ENSMUSG00000033147	0.423699	0.142775	2.9676	0.00300138	0.0800431	Slc22a15
ENSMUSG00000033788	0.996365	0.335785	2.96727	0.0030046	0.0800431	Dysf
ENSMUSG00000023094	0.935424	0.315894	2.9612	0.00306447	0.0815059	Msrb2
ENSMUSG00000061911	0.426234	0.14398	2.96037	0.00307271	0.081593	Myt1l
ENSMUSG00000090785	1.5845	0.535404	2.95945	0.00308191	0.0817055	Gm17116
ENSMUSG00000038855	0.714452	0.241713	2.95579	0.00311873	0.0824156	Itpkb
ENSMUSG00000057133	0.419859	0.142025	2.95623	0.00311426	0.0824156	Chd6
ENSMUSG00000071176	0.482152	0.163226	2.95389	0.00313799	0.0827916	Arhgef10
ENSMUSG00000027401	0.730775	0.247461	2.95309	0.00314611	0.0828727	Tgm3
ENSMUSG00000032268	0.975538	0.330466	2.952	0.00315719	0.0829445	Tmprss5
ENSMUSG00000054976	0.681526	0.230882	2.95183	0.00315893	0.0829445	9430031J16Rik
ENSMUSG00000026824	-0.798464	0.270732	-2.94927	0.00318522	0.0833684	Kcnj3
ENSMUSG00000027381	-1.22269	0.414551	-2.94943	0.00318357	0.0833684	Bcl2l11
ENSMUSG00000022321	-0.550194	0.187272	-2.93795	0.00330394	0.0863139	Cdh10
ENSMUSG00000043051	0.632667	0.215373	2.93754	0.00330825	0.0863139	Disc1
ENSMUSG00000019888	-0.946348	0.322701	-2.93259	0.00336152	0.087288	Mgat4c
ENSMUSG00000027201	-0.318981	0.108755	-2.93302	0.00335678	0.087288	Myef2
ENSMUSG00000055027	1.37228	0.467907	2.9328	0.00335921	0.087288	Smyd1
ENSMUSG00000052102	0.433091	0.147723	2.93178	0.00337022	0.0873759	Gnpda1
ENSMUSG00000088108	1.42471	0.486331	2.92951	0.00339495	0.0878785	Snora47
ENSMUSG00000022037	-0.462882	0.158133	-2.92717	0.00342058	0.0884026	Clu
ENSMUSG00000035934	-0.805772	0.275414	-2.92568	0.00343709	0.0886698	Pknox2
ENSMUSG00000053166	-0.804631	0.275063	-2.92526	0.00344171	0.0886698	Cdh22
ENSMUSG00000053093	0.691377	0.236482	2.92359	0.00346023	0.0890066	Myh7
ENSMUSG00000074664	-0.920195	0.314801	-2.9231	0.00346561	0.0890066	A830092H15Rik
ENSMUSG00000021340	0.683778	0.233996	2.92218	0.00347595	0.089133	Gpld1
ENSMUSG00000050296	1.50803	0.516738	2.91836	0.00351873	0.0900893	Abca12
ENSMUSG00000020917	0.404671	0.138737	2.91682	0.00353623	0.0903965	Acly
ENSMUSG00000039308	0.520837	0.178853	2.9121	0.0035901	0.0916312	Ndst2
ENSMUSG00000055296	0.547005	0.187884	2.91139	0.00359821	0.0916959	D730040F13Rik
ENSMUSG00000006732	-0.593436	0.203964	-2.90952	0.00361984	0.0921041	Mettl1
ENSMUSG00000028701	-0.876978	0.301536	-2.90837	0.00363317	0.0923005	1520402A15Rik
ENSMUSG00000026104	0.543424	0.186893	2.90767	0.00364133	0.0923651	Stat1
ENSMUSG00000021830	0.362531	0.124751	2.90604	0.00366039	0.0925741	Txndc16
ENSMUSG00000028753	1.06055	0.364954	2.906	0.00366084	0.0925741	Vwa5b1
ENSMUSG00000021598	-0.422307	0.145398	-2.9045	0.00367839	0.0928752	Med10
ENSMUSG00000054871	-0.676581	0.23318	-2.90154	0.00371334	0.0936137	Tmem158
ENSMUSG00000033491	-1.02642	0.353925	-2.9001	0.00373045	0.0939011	Prss35
ENSMUSG00000008734	-0.925894	0.319316	-2.89962	0.0037362	0.0939021	Gprc5b
ENSMUSG00000052565	0.64234	0.221669	2.89774	0.00375857	0.0942009	Hist1h1d
ENSMUSG00000062078	-0.642053	0.221576	-2.89766	0.00375955	0.0942009	Qk
ENSMUSG00000061578	0.402156	0.138823	2.8969	0.00376873	0.0942872	Ksr2
ENSMUSG00000000325	0.366838	0.126685	2.89567	0.0037835	0.0944538	Arvcf
ENSMUSG00000075585	-0.638821	0.220634	-2.89539	0.00378689	0.0944538	6330403L08Rik
ENSMUSG00000087038	-0.762271	0.263344	-2.89458	0.00379664	0.0945536	2900079G21Rik
ENSMUSG00000074785	1.05831	0.365925	2.89216	0.00382601	0.0951409	Plxnc1
ENSMUSG00000028341	-0.969051	0.335336	-2.88979	0.00385503	0.0956393	Nr4a3
ENSMUSG00000070601	1.36957	0.473971	2.88957	0.00385769	0.0956393	Vmn2r84
ENSMUSG00000085210	0.615108	0.213011	2.88768	0.00388097	0.0960715	Gm16615
ENSMUSG00000047414	-0.706265	0.244754	-2.88561	0.00390651	0.0965583	Flrt2
ENSMUSG00000024553	-1.85463	0.643166	-2.88359	0.00393165	0.0970338	Galr1
ENSMUSG00000026020	-0.384729	0.13345	-2.88294	0.00393979	0.0970889	Nop58
ENSMUSG00000020185	-1.08534	0.376732	-2.88093	0.00396507	0.0975656	E2f7
ENSMUSG00000020451	0.334389	0.11621	2.87747	0.00400883	0.0983657	Limk2
ENSMUSG00000028906	0.442127	0.153678	2.87697	0.0040152	0.0983657	Epb4.1
ENSMUSG00000030351	0.612889	0.213035	2.87694	0.00401554	0.0983657	Tspan11
ENSMUSG00000087687	-0.543162	0.188839	-2.87631	0.00402349	0.0984139	2900053A13Rik
ENSMUSG00000048776	-2.40648	0.83741	-2.87372	0.00405666	0.0990777	Pthlh
ENSMUSG00000041544	0.530106	0.184595	2.87172	0.00408248	0.0995605	Ptchd2
ENSMUSG00000028089	0.544828	0.189969	2.86799	0.00413094	0.100296	Chd1l
ENSMUSG00000034308	0.5607	0.19546	2.86862	0.00412268	0.100296	Sdr42e1
ENSMUSG00000091299	-0.494636	0.172461	-2.8681	0.00412948	0.100296	Snhg7
ENSMUSG00000021366	-0.570058	0.199038	-2.86407	0.00418237	0.101245	Hivep1
ENSMUSG00000039221	-1.14893	0.401091	-2.8645	0.00417665	0.101245	Rpl22l1
ENSMUSG00000029610	-0.420169	0.146738	-2.86338	0.00419143	0.101315	Aimp2
ENSMUSG00000032534	0.415549	0.145304	2.85986	0.00423826	0.102297	Cep63
ENSMUSG00000040717	0.683707	0.239415	2.85574	0.00429361	0.103481	Il17rd
ENSMUSG00000042364	-0.57189	0.200298	-2.85519	0.0043011	0.10351	Snx18
ENSMUSG00000026254	-0.190019	0.0665824	-2.85389	0.00431878	0.103783	Eif4e2
ENSMUSG00000023826	0.632898	0.222036	2.85043	0.00436607	0.104766	Park2
ENSMUSG00000015484	-1.51314	0.531876	-2.84491	0.00444245	0.106444	Fam163a
ENSMUSG00000026234	-0.338787	0.119159	-2.84315	0.00446693	0.106719	Ncl
ENSMUSG00000040258	-0.84147	0.295943	-2.84336	0.00446413	0.106719	Nxph4
ENSMUSG00000028669	0.556476	0.195799	2.84208	0.00448201	0.106885	1110049F12Rik
ENSMUSG00000029470	0.559956	0.197047	2.84174	0.00448686	0.106885	P2rx4
ENSMUSG00000093661	0.415061	0.146092	2.84108	0.00449604	0.106949
ENSMUSG00000056427	-0.620707	0.21852	-2.84051	0.00450417	0.106987	Slit3
ENSMUSG00000026622	0.851866	0.299951	2.84002	0.00451113	0.106998	Nek2
ENSMUSG00000070342	1.27996	0.450968	2.83825	0.00453616	0.107436	Gm10287
ENSMUSG00000022802	0.539587	0.19029	2.8356	0.00457401	0.107546	Lmln
ENSMUSG00000024513	-0.416374	0.146838	-2.8356	0.004574	0.107546	Mbd2
ENSMUSG00000025175	1.07326	0.378377	2.83649	0.00456122	0.107546	Fn3k
ENSMUSG00000045664	0.398015	0.140385	2.83518	0.00458002	0.107546	Cdc42ep2
ENSMUSG00000055065	-0.180734	0.063719	-2.83642	0.0045622	0.107546	Ddx17
ENSMUSG00000058290	-0.992538	0.35008	-2.83518	0.00458004	0.107546	Espl1
ENSMUSG00000014592	0.335214	0.118313	2.83329	0.00460722	0.107793	Camta1
ENSMUSG00000022438	0.514104	0.181494	2.83262	0.00461679	0.107793	Parvb
ENSMUSG00000048027	-0.329835	0.116429	-2.83294	0.00461224	0.107793	Rgmb
ENSMUSG00000053580	-0.426101	0.150417	-2.8328	0.00461426	0.107793	Tanc2
ENSMUSG00000045441	0.7034	0.248539	2.83014	0.00465273	0.108478	Gprin3
ENSMUSG00000029098	0.392107	0.138692	2.82718	0.00469603	0.109332	Acox3
ENSMUSG00000053644	0.350665	0.124122	2.82517	0.0047256	0.10971	Aldh7a1
ENSMUSG00000090867	-0.74167	0.262484	-2.82558	0.00471949	0.10971	Snhg1
ENSMUSG00000091267	0.758713	0.268617	2.82451	0.00473527	0.109779	Gm17322
ENSMUSG00000037172	0.619795	0.219559	2.8229	0.00475909	0.110176	E330009J07Rik
ENSMUSG00000042156	0.32493	0.115132	2.82225	0.00476875	0.110245	Dzip1
ENSMUSG00000092112	1.34033	0.475021	2.82162	0.00477811	0.110306	Gm6996
ENSMUSG00000092112	1.34033	0.475021	2.82162	0.00477811	0.110306	Gm6996
ENSMUSG00000092112	1.34033	0.475021	2.82162	0.00477811	0.110306	Gm6996
ENSMUSG00000092112	1.34033	0.475021	2.82162	0.00477811	0.110306	Gm6996
ENSMUSG00000092112	1.34033	0.475021	2.82162	0.00477811	0.110306	Gm6996
ENSMUSG00000092112	1.34033	0.475021	2.82162	0.00477811	0.110306	Gm6996
ENSMUSG00000092112	1.34033	0.475021	2.82162	0.00477811	0.110306	Gm6996
ENSMUSG00000092112	1.34033	0.475021	2.82162	0.00477811	0.110306	Gm6996
ENSMUSG00000092112	1.34033	0.475021	2.82162	0.00477811	0.110306	Gm6996
ENSMUSG00000092112	1.34033	0.475021	2.82162	0.00477811	0.110306	Gm6996
ENSMUSG00000092112	1.34033	0.475021	2.82162	0.00477811	0.110306	Gm6996
ENSMUSG00000022434	0.413249	0.146549	2.81987	0.00480428	0.110348	Fam118a
ENSMUSG00000031458	0.410231	0.14551	2.81926	0.0048135	0.110348	2410022L05Rik
ENSMUSG00000036880	-0.477862	0.169464	-2.81985	0.00480462	0.110348	Acaa2
ENSMUSG00000079724	0.540926	0.191866	2.8193	0.00481288	0.110348	Rnaset2b
ENSMUSG00000079724	0.540926	0.191866	2.8193	0.00481288	0.110348	Rnaset2b
ENSMUSG00000090290	0.727178	0.257847	2.82019	0.00479948	0.110348	Gm17296
ENSMUSG00000049775	-0.473414	0.16799	-2.81812	0.00483064	0.110587	Tmsb4x
ENSMUSG00000050936	0.44648	0.158484	2.81719	0.00484458	0.110752	Hist2h2bb
ENSMUSG00000016554	-0.361926	0.128574	-2.81492	0.0048789	0.111284	Eif3d
ENSMUSG00000079407	1.18269	0.420175	2.81476	0.00488141	0.111284	1700110I01Rik
ENSMUSG00000045312	-0.669886	0.238187	-2.81244	0.00491675	0.111934	Lhfpl2
ENSMUSG00000033216	-0.33418	0.119004	-2.80815	0.00498267	0.113278	Eefsec
ENSMUSG00000025732	-0.639806	0.228176	-2.804	0.00504731	0.114589	Fam195a
ENSMUSG00000036766	-0.241345	0.0861422	-2.80171	0.00508329	0.11493	Dner
ENSMUSG00000045896	0.386475	0.137913	2.8023	0.00507398	0.11493	Paip2b
ENSMUSG00000062098	-0.657542	0.234683	-2.80183	0.00508132	0.11493	Btbd3
ENSMUSG00000028838	1.1147	0.398055	2.80036	0.00510458	0.115253	Extl1
ENSMUSG00000039414	0.240641	0.0859624	2.79938	0.00512016	0.115446	Heatr5b
ENSMUSG00000039414	0.240641	0.0859624	2.79938	0.00512016	0.115446	Heatr5b
ENSMUSG00000079722	0.978955	0.349766	2.79888	0.00512796	0.115463	Ttll2
ENSMUSG00000079139	-0.392769	0.14044	-2.79671	0.00516263	0.116085	Gm4204
ENSMUSG00000038602	-0.592052	0.211992	-2.7928	0.00522536	0.117015	Slc35f1
ENSMUSG00000042035	0.442295	0.158368	2.79283	0.00522488	0.117015	Igsf3
ENSMUSG00000046321	-0.349342	0.125052	-2.79358	0.00521287	0.117015	Hs3st2
ENSMUSG00000030849	-0.965656	0.346087	-2.79021	0.00526742	0.117705	Fgfr2
ENSMUSG00000032803	-0.304374	0.109128	-2.78914	0.00528475	0.117705	Cdv3
ENSMUSG00000035910	1.16987	0.419439	2.78914	0.00528479	0.117705	Dcdc2a
ENSMUSG00000046093	0.423903	0.151979	2.78922	0.00528344	0.117705	Hpcal4
ENSMUSG00000074674	0.565472	0.20324	2.78229	0.00539762	0.120055	Gm10742
ENSMUSG00000035429	0.831289	0.29892	2.78097	0.00541959	0.120381	Ptprh
ENSMUSG00000044499	-0.560915	0.201851	-2.77886	0.00545504	0.121005	Hs3st5
ENSMUSG00000021890	-0.404704	0.145704	-2.77758	0.00547661	0.121045	Eaf1
ENSMUSG00000027227	0.45989	0.165581	2.77744	0.00547897	0.121045	Sord
ENSMUSG00000055148	0.949874	0.341903	2.77819	0.00546622	0.121045	Klf2
ENSMUSG00000002625	0.31708	0.114204	2.77645	0.00549566	0.121251	Akap8l
ENSMUSG00000029291	0.203793	0.0734132	2.77596	0.00550382	0.121269	Rufy3
ENSMUSG00000025885	-0.507369	0.182954	-2.77321	0.00555069	0.122137	Myo5b
ENSMUSG00000075334	-0.739732	0.266911	-2.77145	0.00558068	0.122633	Rprm
ENSMUSG00000050822	-0.347815	0.125552	-2.77029	0.00560072	0.122909	Slc29a4
ENSMUSG00000029130	0.539021	0.194985	2.76442	0.00570233	0.124972	Rnf32
ENSMUSG00000063018	-0.745132	0.269695	-2.76287	0.00572963	0.125403	2010204K13Rik
ENSMUSG00000034098	-0.827069	0.299522	-2.7613	0.00575719	0.125839	Fstl5
ENSMUSG00000013089	-1.52893	0.553909	-2.76025	0.00577569	0.125908	Etv5
ENSMUSG00000030513	-0.680079	0.246372	-2.76037	0.00577353	0.125908	Pcsk6
ENSMUSG00000042644	0.715518	0.259331	2.75909	0.00579617	0.126188	Itpr3
ENSMUSG00000070803	1.25121	0.453774	2.75733	0.00582752	0.126702	Cited4
ENSMUSG00000021892	0.652315	0.236802	2.75469	0.00587483	0.127562	Sh3bp5
ENSMUSG00000029055	0.450843	0.163705	2.754	0.00588722	0.127663	Plch2
ENSMUSG00000027955	-1.31867	0.479079	-2.75251	0.00591412	0.128077	Fam198b
ENSMUSG00000003341	1.23494	0.448893	2.75107	0.00594006	0.128375	Atp8b3
ENSMUSG00000074575	-1.34009	0.487151	-2.75088	0.00594348	0.128375	Kcng1
ENSMUSG00000083012	-0.757266	0.275327	-2.75043	0.00595176	0.128385	2810453I06Rik
ENSMUSG00000049583	-0.620924	0.225838	-2.74942	0.00597013	0.128612	Grm5
ENSMUSG00000020593	0.83082	0.302333	2.74803	0.00599543	0.128988	Lpin1
ENSMUSG00000049420	-0.768902	0.279909	-2.74697	0.00601489	0.129238	Tmem200a
ENSMUSG00000022829	-0.703949	0.256341	-2.74614	0.00603002	0.129393	Stxbp5l
ENSMUSG00000022246	-0.442459	0.161151	-2.74561	0.00603981	0.129435	Rai14
ENSMUSG00000036712	0.416855	0.15185	2.74518	0.00604784	0.129438	Cyld
ENSMUSG00000021371	0.479097	0.174622	2.74363	0.00607637	0.129807	Ccdc90a
ENSMUSG00000022389	0.474169	0.172852	2.74321	0.00608413	0.129807	Tef
ENSMUSG00000093668	1.35005	0.492186	2.74296	0.00608877	0.129807	Pou5f2
ENSMUSG00000030595	-0.471881	0.172384	-2.73738	0.0061931	0.131735	Nfkbib
ENSMUSG00000031024	0.645736	0.235942	2.73684	0.00620323	0.131735	St5
ENSMUSG00000050315	0.754205	0.275565	2.73694	0.00620135	0.131735	Synpo2
ENSMUSG00000040820	0.495655	0.181142	2.73628	0.00621377	0.131788	Hlcs
ENSMUSG00000049580	-0.64774	0.236972	-2.7334	0.00626837	0.132775	Tsku
ENSMUSG00000005142	0.542254	0.198697	2.72905	0.00635178	0.134368	Man2b1
ENSMUSG00000011831	0.244511	0.089662	2.72703	0.00639064	0.134862	Evi5
ENSMUSG00000034579	0.792872	0.29075	2.72699	0.00639154	0.134862	Pla2g3
ENSMUSG00000001763	0.500262	0.183569	2.7252	0.00642629	0.135248	Tspan33
ENSMUSG00000031093	0.510894	0.187446	2.72555	0.0064194	0.135248	Dock11
ENSMUSG00000031558	-1.05903	0.388731	-2.72434	0.0064431	0.135429	Slit2
ENSMUSG00000002983	-1.07318	0.394083	-2.72324	0.00646459	0.135707	Relb
ENSMUSG00000020048	-0.207185	0.0761139	-2.72203	0.00648816	0.135855	Hsp90b1
ENSMUSG00000030314	0.295317	0.10848	2.7223	0.00648291	0.135855	Atg7
ENSMUSG00000049112	-0.769087	0.282632	-2.72116	0.00650532	0.136041	Oxtr
ENSMUSG00000053656	-0.788889	0.290011	-2.7202	0.00652415	0.136261	2700023E23Rik
ENSMUSG00000029054	-0.574627	0.211355	-2.71877	0.00655246	0.136679	Gabrd
ENSMUSG00000040557	0.674158	0.248136	2.71688	0.00659	0.137288	Wbscr27
ENSMUSG00000010803	-0.553535	0.203987	-2.71358	0.00665611	0.138489	Gabra1
ENSMUSG00000028364	-1.01657	0.374748	-2.71268	0.00667416	0.138501	Tnc
ENSMUSG00000036466	-0.943124	0.347698	-2.71248	0.00667817	0.138501	Megf11
ENSMUSG00000057614	-0.283817	0.104641	-2.71229	0.00668194	0.138501	Gnai1
ENSMUSG00000023089	-0.433509	0.159943	-2.71039	0.00672039	0.139122	Ndufa5
ENSMUSG00000000532	0.351173	0.129728	2.70699	0.00678956	0.140377	Acvr1b
ENSMUSG00000031828	0.716914	0.26501	2.70524	0.00682556	0.140944	Klhl36
ENSMUSG00000089997	1.40449	0.519617	2.70294	0.006873	0.141746	1810020O05Rik
ENSMUSG00000086328	1.32796	0.49144	2.70219	0.0068884	0.141886	2700033N17Rik
ENSMUSG00000020766	-0.709473	0.262743	-2.70026	0.00692856	0.142356	Galk1
ENSMUSG00000021694	-0.440725	0.163193	-2.70064	0.00692061	0.142356	Ercc8
ENSMUSG00000019935	0.99634	0.36917	2.69887	0.00695758	0.142418	Slc17a8
ENSMUSG00000024921	-0.385542	0.142848	-2.69896	0.00695567	0.142418	Smarca2
ENSMUSG00000087259	0.580487	0.215033	2.69953	0.00694377	0.142418	2610035D17Rik
ENSMUSG00000020644	-0.936041	0.346924	-2.69812	0.00697326	0.142562	Id2
ENSMUSG00000035967	0.746808	0.276838	2.69764	0.00698332	0.14259	Ddx26b
ENSMUSG00000027078	-0.626372	0.232237	-2.69712	0.00699417	0.142634	Ube2l6
ENSMUSG00000022517	0.237883	0.088294	2.69421	0.00705552	0.14331	Mgrn1
ENSMUSG00000027750	0.788385	0.292656	2.6939	0.00706217	0.14331	Postn
ENSMUSG00000028294	-1.22846	0.455867	-2.69478	0.00704352	0.14331	1700003M02Rik
ENSMUSG00000036180	-0.351642	0.130505	-2.69446	0.00705029	0.14331	Gatad2a
ENSMUSG00000030695	-0.415824	0.154426	-2.69271	0.00708735	0.143548	Aldoa
ENSMUSG00000030695	-0.415824	0.154426	-2.69271	0.00708735	0.143548	Aldoa
ENSMUSG00000031139	0.634368	0.235604	2.69252	0.00709139	0.143548	Mcf2
ENSMUSG00000046109	-0.747922	0.277865	-2.69167	0.00710947	0.143737	AB041806
ENSMUSG00000034066	0.547459	0.203554	2.68951	0.00715573	0.144318	Farp2
ENSMUSG00000052783	0.665688	0.247481	2.68986	0.00714828	0.144318	Grk4
ENSMUSG00000047907	-0.835304	0.310746	-2.68806	0.00718688	0.144768	Tshz2
ENSMUSG00000050711	-1.09808	0.408779	-2.68623	0.00722635	0.145385	Scg2
ENSMUSG00000060600	-0.563863	0.209956	-2.68562	0.00723949	0.145471	Eno3
ENSMUSG00000030889	0.652915	0.243217	2.68449	0.00726401	0.145786	Vwa3a
ENSMUSG00000036879	-0.479569	0.179066	-2.67817	0.00740254	0.148204	Phkb
ENSMUSG00000053552	0.384382	0.143509	2.67845	0.00739647	0.148204	Ebf4
ENSMUSG00000045102	1.21014	0.452265	2.67572	0.00745689	0.149111	Poln
ENSMUSG00000023034	-1.01625	0.379891	-2.67511	0.00747054	0.149202	Nr4a1
ENSMUSG00000017670	0.25339	0.0948465	2.67158	0.00754944	0.150412	Elmo2
ENSMUSG00000039629	-0.959885	0.359242	-2.67198	0.00754056	0.150412	Fam40b
ENSMUSG00000027339	0.438579	0.164239	2.67037	0.00757681	0.150775	Rassf2
ENSMUSG00000002265	0.469521	0.175857	2.66991	0.00758724	0.1508	Peg3
ENSMUSG00000022696	-0.637362	0.239032	-2.66643	0.00766606	0.151454	Sidt1
ENSMUSG00000028402	0.289677	0.108631	2.66661	0.00766195	0.151454	Mpdz
ENSMUSG00000032827	0.213147	0.0799283	2.66673	0.00765943	0.151454	Ppp1r9a
ENSMUSG00000035722	0.656311	0.246139	2.66643	0.00766624	0.151454	Abca7
ENSMUSG00000085832	-1.26203	0.4732	-2.667	0.00765313	0.151454	D430036J16Rik
ENSMUSG00000054226	0.340815	0.127847	2.6658	0.0076805	0.151554	Tprkb
ENSMUSG00000020623	0.372079	0.139692	2.66357	0.00773159	0.151578	Map2k6
ENSMUSG00000031066	0.20546	0.077094	2.66506	0.0076975	0.151578	Usp11
ENSMUSG00000033458	0.941508	0.353484	2.66351	0.00773306	0.151578	Fan1
ENSMUSG00000038205	0.555912	0.208636	2.6645	0.00771023	0.151578	Prkab2
ENSMUSG00000055775	1.04304	0.391628	2.66333	0.00773704	0.151578	Myh8
ENSMUSG00000090086	0.636911	0.239054	2.6643	0.00771493	0.151578	AI480526
ENSMUSG00000059554	0.515774	0.193832	2.66093	0.00779249	0.152482	Ccdc28a
ENSMUSG00000040860	0.803448	0.302266	2.65808	0.00785867	0.153412	Crocc
ENSMUSG00000071035	0.788817	0.296722	2.65844	0.00785036	0.153412	Gm5499
ENSMUSG00000028766	-1.44338	0.543228	-2.65704	0.0078829	0.153703	Alpl
ENSMUSG00000093507	1.20505	0.454176	2.65327	0.00797163	0.155248
ENSMUSG00000050953	-1.13725	0.428757	-2.65243	0.00799147	0.155451	Gja1
ENSMUSG00000037108	-0.582753	0.219895	-2.65014	0.0080458	0.156322	Zcwpw1
ENSMUSG00000048216	0.554075	0.209113	2.64965	0.00805763	0.156368	Gpr85
ENSMUSG00000018678	-0.512414	0.193684	-2.64561	0.00815428	0.157745	Sp2
ENSMUSG00000063382	0.31232	0.118058	2.64548	0.00815741	0.157745	Bcl9l
ENSMUSG00000086480	-1.46319	0.553045	-2.64569	0.00815235	0.157745	Gm15287
ENSMUSG00000009731	0.361119	0.13656	2.64441	0.00818342	0.157877	Kcnd1
ENSMUSG00000010025	0.334569	0.126509	2.64462	0.00817835	0.157877	Aldh3a2
ENSMUSG00000028971	-0.846111	0.320508	-2.6399	0.00829297	0.159803	Cort
ENSMUSG00000018634	-0.827022	0.313534	-2.63774	0.00834604	0.160637	Crhr1
ENSMUSG00000090940	0.642127	0.243679	2.63513	0.00841048	0.161688	AW121686
ENSMUSG00000039546	-0.480437	0.1825	-2.63253	0.00847514	0.162551	Ajap1
ENSMUSG00000053040	0.519	0.197123	2.63288	0.00846644	0.162551	Aph1c
ENSMUSG00000020546	0.533604	0.202887	2.63005	0.0085372	0.16298	Stxbp4
ENSMUSG00000021253	0.558022	0.212163	2.63015	0.00853461	0.16298	Tgfb3
ENSMUSG00000028289	-0.476113	0.181023	-2.63013	0.00853527	0.16298	Epha7
ENSMUSG00000049354	0.272667	0.10365	2.63066	0.00852189	0.16298	Dcaf7
ENSMUSG00000072109	0.683524	0.260055	2.62839	0.00857912	0.163591	A530040E14Rik
ENSMUSG00000024436	-0.328614	0.125101	-2.62679	0.00861949	0.16379	Mrps18b
ENSMUSG00000041460	1.46097	0.556179	2.6268	0.00861924	0.16379	Cacna2d4
ENSMUSG00000085125	1.05917	0.40315	2.62724	0.00860813	0.16379	Gm16070
ENSMUSG00000004267	-0.450775	0.171814	-2.62363	0.00869987	0.165099	Eno2
ENSMUSG00000028648	-0.249369	0.0950594	-2.62329	0.00870843	0.165099	Ndufs5
ENSMUSG00000028648	-0.249369	0.0950594	-2.62329	0.00870843	0.165099	Ndufs5
ENSMUSG00000017417	1.01773	0.388251	2.62133	0.0087588	0.165671	Plxdc1
ENSMUSG00000041360	-0.476207	0.181658	-2.62145	0.00875557	0.165671	D19Bwg1357e
ENSMUSG00000056476	0.32266	0.123166	2.61971	0.00880045	0.166268	Med12l
ENSMUSG00000024535	0.393323	0.150196	2.61873	0.00882572	0.166554	Snx24
ENSMUSG00000031984	-0.406088	0.15525	-2.61571	0.00890419	0.16765	2810004N23Rik
ENSMUSG00000037681	1.14363	0.437195	2.61584	0.00890087	0.16765	Esyt3
ENSMUSG00000008393	0.435561	0.166607	2.6143	0.00894115	0.167736	Carhsp1
ENSMUSG00000026605	0.665443	0.254514	2.61457	0.00893411	0.167736	Cenpf
ENSMUSG00000026749	0.378122	0.144676	2.61358	0.00895982	0.167736	Nek6
ENSMUSG00000028164	0.884369	0.338294	2.6142	0.00894366	0.167736	Manba
ENSMUSG00000065501	-1.43426	0.548695	-2.61394	0.00895056	0.167736	Mir335
ENSMUSG00000037259	0.435418	0.166634	2.61301	0.00897479	0.167795	6330439K17Rik
ENSMUSG00000038007	1.64222	0.628672	2.6122	0.00899609	0.167795	Acer2
ENSMUSG00000041977	0.391409	0.149811	2.61268	0.00898361	0.167795	Arhgef11
ENSMUSG00000074489	1.72699	0.661199	2.61191	0.00900381	0.167795	Bglap-rs1
ENSMUSG00000024456	0.429935	0.164673	2.61084	0.00903201	0.167955	Diap1
ENSMUSG00000034156	0.503355	0.192797	2.61081	0.00903279	0.167955	Bzrap1
ENSMUSG00000046942	0.929783	0.356204	2.61026	0.0090474	0.168036	Mageb16
ENSMUSG00000002222	0.353222	0.135425	2.60824	0.00910088	0.168195	Rmnd5a
ENSMUSG00000003541	0.731628	0.280468	2.6086	0.00909132	0.168195	Ier3
ENSMUSG00000004455	-0.37795	0.144906	-2.60824	0.0091009	0.168195	Ppp1cc
ENSMUSG00000022012	-0.402024	0.154063	-2.60948	0.00906806	0.168195	Enox1
ENSMUSG00000034729	-0.250764	0.0961515	-2.60801	0.00910713	0.168195	Mrps10
ENSMUSG00000049985	0.746245	0.286239	2.60707	0.00913213	0.168468	Ankrd55
ENSMUSG00000039849	0.436686	0.167618	2.60524	0.00918106	0.169181	Pcif1
ENSMUSG00000010311	0.667231	0.256152	2.60482	0.00919214	0.169195	Optc
ENSMUSG00000022177	0.836335	0.321545	2.60099	0.00929553	0.169882	Haus4
ENSMUSG00000022885	0.554126	0.212924	2.60246	0.00925573	0.169882	St6gal1
ENSMUSG00000039037	-0.710477	0.27303	-2.60219	0.00926304	0.169882	St6galnac5
ENSMUSG00000046688	1.2355	0.474851	2.60187	0.00927161	0.169882	Tifa
ENSMUSG00000050967	0.74675	0.287128	2.60076	0.00930179	0.169882	Creg2
ENSMUSG00000051726	-0.821187	0.315575	-2.60219	0.00926302	0.169882	Kcnf1
ENSMUSG00000085167	0.628782	0.24173	2.60117	0.00929052	0.169882	Gm12063
ENSMUSG00000041324	-1.15881	0.445669	-2.60015	0.00931838	0.169996	Inhba
ENSMUSG00000053819	-0.558661	0.214896	-2.59968	0.00933096	0.170037	Camk2d
ENSMUSG00000020811	-0.699257	0.269065	-2.59884	0.00935406	0.17008	Wscd1
ENSMUSG00000028358	0.412164	0.158583	2.59903	0.00934867	0.17008	Zfp618
ENSMUSG00000068551	0.458283	0.176486	2.59671	0.00941207	0.170946	Zfp467
ENSMUSG00000022197	-0.893132	0.344407	-2.59325	0.00950745	0.172399	Pdzd2
ENSMUSG00000029110	-0.240095	0.092593	-2.59302	0.00951379	0.172399	Rnf4
ENSMUSG00000067438	0.819336	0.316021	2.59267	0.00952351	0.172399	Hmx1
ENSMUSG00000053119	-0.298572	0.115244	-2.59078	0.00957574	0.172856	Chmp3
ENSMUSG00000056204	0.309766	0.119543	2.59125	0.00956293	0.172856	Pgpep1
ENSMUSG00000062778	1.30679	0.504431	2.59062	0.00958032	0.172856	Chia
ENSMUSG00000031286	-1.11304	0.430092	-2.58792	0.00965576	0.174026	Glt28d2
ENSMUSG00000025362	-0.349817	0.135247	-2.58651	0.00969544	0.17419	Rps26
ENSMUSG00000025362	-0.349817	0.135247	-2.58651	0.00969544	0.17419	Rps26
ENSMUSG00000025754	1.17158	0.452964	2.58648	0.00969606	0.17419	Agbl1
ENSMUSG00000038967	0.489841	0.189387	2.58646	0.00969667	0.17419	Pdk2
ENSMUSG00000039046	-0.363443	0.140575	-2.5854	0.00972652	0.174536	Usp6nl
ENSMUSG00000021125	0.564648	0.218526	2.5839	0.00976905	0.174765	Arg2
ENSMUSG00000024978	0.305601	0.118275	2.58382	0.0097712	0.174765	Gpam
ENSMUSG00000090877	0.858734	0.332257	2.58454	0.00975078	0.174765	Hspa1b
ENSMUSG00000036026	-0.194224	0.0751827	-2.58336	0.00978431	0.174809	Tmem63b
ENSMUSG00000027011	-0.372445	0.144197	-2.58289	0.00979764	0.174857	Ube2e3
ENSMUSG00000040653	-0.335995	0.130182	-2.58096	0.0098526	0.175626	Ppp1r14c
ENSMUSG00000063229	-0.515422	0.199727	-2.58063	0.00986204	0.175626	Ldha
ENSMUSG00000090444	1.00631	0.390134	2.57939	0.00989751	0.176066	D930048G16Rik
ENSMUSG00000029217	-1.64581	0.63822	-2.57875	0.00991594	0.176204	Tec
ENSMUSG00000022887	0.650906	0.252534	2.5775	0.00995182	0.17646	Masp1
ENSMUSG00000055421	-0.640348	0.248426	-2.57762	0.00994843	0.17646	Pcdh9
ENSMUSG00000027187	0.525486	0.203962	2.57639	0.00998384	0.176837	Cat
ENSMUSG00000021905	-0.292893	0.113753	-2.57483	0.010029	0.177445	Dph3
ENSMUSG00000029015	1.38517	0.538428	2.57263	0.010093	0.178385	Slc26a5
ENSMUSG00000052738	-0.278359	0.108276	-2.57083	0.0101454	0.178927	Suclg1
ENSMUSG00000084790	-0.661045	0.257099	-2.57117	0.0101356	0.178927	Gm15879
ENSMUSG00000085289	1.56491	0.609678	2.56679	0.0102645	0.180833	Gm15337
ENSMUSG00000043487	0.533356	0.207827	2.56634	0.0102777	0.180873	Acot6
ENSMUSG00000029334	-0.915637	0.356841	-2.56595	0.0102894	0.180884	Prkg2
ENSMUSG00000076433	0.927033	0.361663	2.56325	0.0103697	0.182102	BC100451
ENSMUSG00000025159	0.330996	0.129306	2.55978	0.0104738	0.183734	Mms19
ENSMUSG00000020334	0.613042	0.239706	2.55747	0.0105437	0.183772	Slc22a4
ENSMUSG00000022361	0.455896	0.17826	2.55748	0.0105434	0.183772	Zhx1
ENSMUSG00000025132	-0.252055	0.0985311	-2.55813	0.0105238	0.183772	Arhgdia
ENSMUSG00000037410	0.346542	0.135449	2.55846	0.0105138	0.183772	Tbc1d2b
ENSMUSG00000042256	-0.770844	0.301494	-2.55675	0.0105655	0.183772	3110082D06Rik
ENSMUSG00000054196	-1.03151	0.403381	-2.55716	0.010553	0.183772	Cthrc1
ENSMUSG00000066979	-0.249591	0.097594	-2.55744	0.0105446	0.183772	Bub3
ENSMUSG00000080533	1.06801	0.417717	2.55678	0.0105647	0.183772	Mir1191
ENSMUSG00000032462	0.408963	0.160042	2.55535	0.0106083	0.184321	Pik3cb
ENSMUSG00000001918	0.784836	0.307439	2.55282	0.0106856	0.185469	Slc1a5
ENSMUSG00000022860	1.11486	0.437043	2.55092	0.0107439	0.186284	Chodl
ENSMUSG00000040495	-0.466053	0.182769	-2.54997	0.0107734	0.186598	Chrm4
ENSMUSG00000021481	0.377801	0.148218	2.54896	0.0108046	0.186942	Zfp346
ENSMUSG00000022641	0.69148	0.271523	2.54667	0.0108756	0.187974	Bbx
ENSMUSG00000060376	0.366487	0.143974	2.54551	0.0109119	0.188401	Bckdha
ENSMUSG00000024301	0.613087	0.240963	2.54432	0.010949	0.188647	Kifc5b
ENSMUSG00000036473	0.254002	0.0998305	2.54434	0.0109486	0.188647	Tbc1d24
ENSMUSG00000029022	0.422382	0.166105	2.54287	0.0109947	0.189103	Miip
ENSMUSG00000032515	-1.0033	0.394851	-2.54097	0.0110546	0.189103	Csrnp1
ENSMUSG00000037492	-1.00464	0.395315	-2.54136	0.0110421	0.189103	Zmat4
ENSMUSG00000038214	0.359725	0.141587	2.54068	0.0110639	0.189103	Bend3
ENSMUSG00000041773	-0.365094	0.143696	-2.54075	0.0110616	0.189103	Enc1
ENSMUSG00000074264	0.433349	0.170518	2.54137	0.011042	0.189103	Amy1
ENSMUSG00000087511	-0.799597	0.314514	-2.54233	0.0110117	0.189103	A330009N23Rik
ENSMUSG00000091993	-1.19894	0.471921	-2.54056	0.0110675	0.189103	B930036N10Rik
ENSMUSG00000042389	-0.417158	0.164226	-2.54014	0.0110808	0.189133	Tsen2
ENSMUSG00000028399	-0.419541	0.165214	-2.53938	0.0111049	0.189348	Ptprd
ENSMUSG00000035776	0.30238	0.119107	2.53873	0.0111254	0.189501	Cd99l2
ENSMUSG00000020186	-0.558151	0.219999	-2.53706	0.0111789	0.190215	Csrp2
ENSMUSG00000079502	0.860476	0.339359	2.53559	0.0112258	0.190816	1700101E01Rik
ENSMUSG00000036572	0.477909	0.188546	2.53471	0.011254	0.191097	Upf3b
ENSMUSG00000000339	-0.20418	0.080608	-2.533	0.0113092	0.191836	Rtcd1
ENSMUSG00000018446	-0.274712	0.10849	-2.53213	0.0113371	0.192111	C1qbp
ENSMUSG00000019820	-0.778043	0.307372	-2.53127	0.011365	0.192113	Utrn
ENSMUSG00000031681	0.263818	0.104248	2.53069	0.0113839	0.192113	Smad1
ENSMUSG00000035284	0.294757	0.11647	2.53077	0.0113814	0.192113	Vps13c
ENSMUSG00000057182	0.281585	0.111266	2.53074	0.0113822	0.192113	Scn3a
ENSMUSG00000040605	-1.36218	0.538398	-2.53005	0.0114045	0.192262	Bace2
ENSMUSG00000038412	-0.509116	0.201367	-2.52831	0.0114614	0.193024	Higd1a
ENSMUSG00000023456	-0.489742	0.193747	-2.52774	0.0114799	0.193137	Tpi1
ENSMUSG00000017493	-0.803323	0.318059	-2.52571	0.0115466	0.19406	Igfbp4
ENSMUSG00000051397	0.998655	0.395454	2.52534	0.0115587	0.194066	Tacstd2
ENSMUSG00000022475	0.549414	0.217888	2.52155	0.011684	0.195571	Hdac7
ENSMUSG00000036854	0.747981	0.296578	2.52204	0.0116677	0.195571	Hspb6
ENSMUSG00000060509	1.4934	0.59221	2.52174	0.0116777	0.195571	Xcr1
ENSMUSG00000036918	0.546971	0.217031	2.52025	0.0117273	0.196095	Ttc7
ENSMUSG00000074521	-0.536557	0.212935	-2.51982	0.0117415	0.196133	Gm14327
ENSMUSG00000029314	0.794395	0.315403	2.51867	0.01178	0.196394	Agpat9
ENSMUSG00000037990	-0.424398	0.168503	-2.51864	0.011781	0.196394	Sh3rf3
ENSMUSG00000039835	0.507712	0.201631	2.51802	0.0118015	0.196537	Nhsl1
ENSMUSG00000021338	-0.324723	0.129018	-2.51687	0.0118401	0.196582	Lrrc16a
ENSMUSG00000029414	-0.727817	0.289116	-2.51738	0.011823	0.196582	Kntc1
ENSMUSG00000038141	0.354161	0.140697	2.51719	0.0118294	0.196582	Tmem181a
ENSMUSG00000040430	-0.309579	0.123031	-2.51627	0.0118603	0.196718	Pitpnc1
ENSMUSG00000028876	0.528254	0.20999	2.51561	0.0118826	0.19689	Epha10
ENSMUSG00000025854	0.297349	0.118233	2.51494	0.0119053	0.197067	Fam20c
ENSMUSG00000026887	-0.315475	0.125476	-2.51422	0.0119295	0.197268	Mrrf
ENSMUSG00000030605	-0.672217	0.267499	-2.51297	0.0119719	0.19739	Mfge8
ENSMUSG00000031137	-0.377251	0.150123	-2.51294	0.0119729	0.19739	Fgf13
ENSMUSG00000062760	-0.404798	0.16106	-2.51334	0.0119593	0.19739	1810041L15Rik
ENSMUSG00000041126	0.722114	0.287445	2.51218	0.0119987	0.19742	H2afv
ENSMUSG00000092216	0.38937	0.154979	2.51241	0.0119911	0.19742	Gm19345
ENSMUSG00000038112	0.897892	0.357536	2.51133	0.0120276	0.197617	AW551984
ENSMUSG00000046719	-1.18887	0.473441	-2.51113	0.0120347	0.197617	Nxph3
ENSMUSG00000036249	0.357605	0.142498	2.50954	0.0120889	0.198309	Rbm43
ENSMUSG00000027793	1.0712	0.427195	2.50753	0.0121578	0.199041	Ccna1
ENSMUSG00000086386	1.14686	0.457363	2.50755	0.0121572	0.199041	Gm12108
ENSMUSG00000035878	0.780877	0.311468	2.50709	0.012173	0.199093	Agphd1
ENSMUSG00000092048	0.957954	0.382424	2.50495	0.0122468	0.2001	Vmn2r85
ENSMUSG00000022840	0.359615	0.143583	2.50458	0.0122596	0.20011	Adcy5
ENSMUSG00000045064	1.05396	0.420877	2.50421	0.0122725	0.200122	Fam164c
ENSMUSG00000027962	-0.84979	0.33944	-2.5035	0.012297	0.200323	Vcam1
ENSMUSG00000001942	0.300504	0.120062	2.50291	0.0123177	0.200461	Siae
ENSMUSG00000060985	0.699521	0.279846	2.49967	0.012431	0.202105	Tdrd5
ENSMUSG00000013076	0.339686	0.135969	2.49826	0.0124805	0.202695	Amotl1
ENSMUSG00000054556	0.933111	0.373553	2.49793	0.0124919	0.202695	Gm4876
ENSMUSG00000037892	-0.730968	0.292807	-2.49641	0.0125457	0.203293	Pcdh18
ENSMUSG00000059820	-0.282496	0.113171	-2.49619	0.0125535	0.203293	AU019823
ENSMUSG00000021756	0.398262	0.159666	2.49435	0.0126187	0.203946	Il6st
ENSMUSG00000042903	1.18337	0.474418	2.49436	0.0126183	0.203946	Foxo4
ENSMUSG00000022962	-0.289272	0.116051	-2.49262	0.0126804	0.204541	Gart
ENSMUSG00000027739	-0.259214	0.103991	-2.49266	0.0126792	0.204541	Rab33b
ENSMUSG00000046607	0.529589	0.212546	2.49164	0.0127153	0.204904	Hrk
ENSMUSG00000032575	-0.278723	0.112032	-2.48788	0.0128508	0.206885	Manf
ENSMUSG00000004473	0.508003	0.20424	2.48728	0.0128723	0.207028	Clec11a
ENSMUSG00000028211	0.596959	0.240084	2.48646	0.0129022	0.207129	Trp53inp1
ENSMUSG00000036968	0.563254	0.226533	2.48641	0.0129038	0.207129	Cnpy4
ENSMUSG00000045817	-0.693539	0.279069	-2.48519	0.0129481	0.207638	Zfp36l2
ENSMUSG00000037035	-0.664839	0.26766	-2.4839	0.0129953	0.207702	Inhbb
ENSMUSG00000046550	0.615148	0.247674	2.4837	0.0130027	0.207702	Spin2
ENSMUSG00000051159	-1.27624	0.513777	-2.48403	0.0129904	0.207702	Cited1
ENSMUSG00000090863	-1.24225	0.500009	-2.48446	0.0129749	0.207702	A530084C06Rik
ENSMUSG00000025478	0.303827	0.12242	2.48184	0.0130704	0.208088	Dpysl4
ENSMUSG00000034858	0.535921	0.215944	2.48176	0.0130735	0.208088	BC031353
ENSMUSG00000050965	-0.492307	0.198375	-2.4817	0.0130758	0.208088	Prkca
ENSMUSG00000081972	0.561291	0.226177	2.48165	0.0130775	0.208088	Gm16397
ENSMUSG00000010505	0.751146	0.302837	2.48037	0.0131247	0.208336	Myt1
ENSMUSG00000027522	0.346259	0.139595	2.48046	0.0131214	0.208336	Stx16
ENSMUSG00000074736	-0.771607	0.311107	-2.48019	0.0131311	0.208336	Tmem90b
ENSMUSG00000033981	-0.456244	0.184039	-2.47907	0.0131726	0.208793	Gria2
ENSMUSG00000086325	-1.03149	0.416268	-2.47795	0.0132139	0.209246	Gm16938
ENSMUSG00000032519	0.500636	0.202103	2.47713	0.0132445	0.209528	Slc25a38
ENSMUSG00000034586	0.312474	0.126233	2.47537	0.0133099	0.210361	C630004H02Rik
ENSMUSG00000020034	0.805369	0.325582	2.47363	0.0133749	0.210982	Tcp11l2
ENSMUSG00000028651	-0.424892	0.171752	-2.47386	0.0133661	0.210982	Ppie
ENSMUSG00000060260	0.399168	0.161408	2.47304	0.013397	0.211128	Pwwp2b
ENSMUSG00000073408	1.17859	0.476713	2.47233	0.0134235	0.211343	Dpcr1
ENSMUSG00000060989	-0.332533	0.134612	-2.47031	0.0134994	0.212335	Gm11847
ENSMUSG00000017405	0.51995	0.210632	2.46852	0.0135674	0.212793	Nek8
ENSMUSG00000028780	-0.669685	0.27127	-2.4687	0.0135604	0.212793	Sema3c
ENSMUSG00000029434	0.278685	0.112886	2.46873	0.0135594	0.212793	Vps33a
ENSMUSG00000030008	0.536052	0.217197	2.46805	0.0135852	0.21287	1700040I03Rik
ENSMUSG00000026603	-0.289692	0.11743	-2.46693	0.0136277	0.213266	Smyd2
ENSMUSG00000041014	-0.410801	0.166539	-2.4667	0.0136365	0.213266	Nrg3
ENSMUSG00000085780	0.879363	0.356562	2.46622	0.0136546	0.213346	4930509G22Rik
ENSMUSG00000030647	-0.455443	0.184756	-2.4651	0.0136975	0.213813	Ndufc2
ENSMUSG00000030647	-0.455443	0.184756	-2.4651	0.0136975	0.213813	Ndufc2
ENSMUSG00000030647	-0.455443	0.184756	-2.4651	0.0136975	0.213813	Ndufc2
ENSMUSG00000025739	-0.931458	0.378248	-2.46256	0.0137951	0.214522	Gng13
ENSMUSG00000054944	0.907017	0.368317	2.4626	0.0137933	0.214522	5330416C01Rik
ENSMUSG00000073470	1.04289	0.423479	2.46268	0.0137903	0.214522	Gm1604b
ENSMUSG00000085526	0.912343	0.370404	2.4631	0.0137741	0.214522	Gm16083
ENSMUSG00000029211	-0.757929	0.30795	-2.46121	0.013847	0.214538	Gabra4
ENSMUSG00000031805	0.478823	0.194571	2.46091	0.0138584	0.214538	Jak3
ENSMUSG00000035864	-0.388674	0.157944	-2.46084	0.0138614	0.214538	Syt1
ENSMUSG00000036086	-0.401739	0.163222	-2.46131	0.0138431	0.214538	Zranb3
ENSMUSG00000041272	-0.665787	0.270454	-2.46174	0.0138265	0.214538	Tox
ENSMUSG00000055373	-0.69457	0.282407	-2.45947	0.0139143	0.215155	Fut9
ENSMUSG00000041552	-0.618437	0.251627	-2.45776	0.0139807	0.215979	Ptchd1
ENSMUSG00000024975	0.47253	0.192323	2.45695	0.0140121	0.216057	Pdcd4
ENSMUSG00000038545	0.45042	0.183312	2.45712	0.0140057	0.216057	Cul7
ENSMUSG00000013833	0.312731	0.127409	2.45454	0.0141067	0.216566	Med16
ENSMUSG00000046491	1.04628	0.426077	2.45561	0.0140646	0.216566	C1qtnf2
ENSMUSG00000046791	-0.594135	0.242067	-2.45443	0.014111	0.216566	2410016O06Rik
ENSMUSG00000062901	0.430088	0.175189	2.455	0.0140885	0.216566	Klhl24
ENSMUSG00000090862	-0.32005	0.130375	-2.45483	0.014095	0.216566	Rps13
ENSMUSG00000090862	-0.32005	0.130375	-2.45483	0.014095	0.216566	Rps13
ENSMUSG00000090862	-0.32005	0.130375	-2.45483	0.014095	0.216566	Rps13
ENSMUSG00000066113	0.567691	0.231551	2.45169	0.0142188	0.218017	Adamtsl1
ENSMUSG00000000202	0.721105	0.294474	2.44879	0.0143339	0.218274	Btbd17
ENSMUSG00000017210	0.211719	0.0864512	2.449	0.0143254	0.218274	Med24
ENSMUSG00000026024	0.340561	0.139085	2.44859	0.0143418	0.218274	Als2
ENSMUSG00000026112	-0.343594	0.1403	-2.44899	0.0143255	0.218274	6330578E17Rik
ENSMUSG00000040690	0.772358	0.31542	2.44867	0.0143387	0.218274	Col16a1
ENSMUSG00000052613	-0.887089	0.362189	-2.44924	0.0143157	0.218274	Pcdh15
ENSMUSG00000061607	0.261982	0.10699	2.44865	0.0143392	0.218274	Mdc1
ENSMUSG00000086180	-0.764384	0.311892	-2.4508	0.0142541	0.218274	Rmst
ENSMUSG00000062070	-0.512008	0.209188	-2.4476	0.014381	0.218669	Pgk1
ENSMUSG00000029778	0.386994	0.15829	2.44485	0.0144914	0.219977	Adcyap1r1
ENSMUSG00000031386	-0.348175	0.142415	-2.44479	0.0144938	0.219977	Hcfc1
ENSMUSG00000020173	0.518477	0.212112	2.44435	0.0145112	0.220037	Cobl
ENSMUSG00000079481	0.548202	0.224518	2.44168	0.0146191	0.221469	Nhsl2
ENSMUSG00000028360	0.862016	0.353196	2.44062	0.0146623	0.221919	Slc44a5
ENSMUSG00000031786	0.689339	0.28254	2.43979	0.0146957	0.22222	Ccdc135
ENSMUSG00000029436	-0.349651	0.143342	-2.43927	0.0147168	0.222334	Mmp17
ENSMUSG00000021820	0.218598	0.0896347	2.43877	0.0147375	0.222443	Camk2g
ENSMUSG00000027994	-1.0414	0.427244	-2.43748	0.01479	0.223031	Ccdc109b
ENSMUSG00000004768	0.262726	0.107807	2.43701	0.0148094	0.223118	Rab23
ENSMUSG00000070699	-0.365789	0.150157	-2.43605	0.0148488	0.223507	Sars2
ENSMUSG00000055053	-0.266733	0.109528	-2.43529	0.0148797	0.223721	Nfic
ENSMUSG00000068854	0.469718	0.1929	2.43504	0.0148903	0.223721	Hist2h2be
ENSMUSG00000071456	-0.469835	0.193015	-2.43419	0.0149252	0.224042	1110002L01Rik
ENSMUSG00000067023	1.90544	0.783807	2.43101	0.0150568	0.22581	Gm626
ENSMUSG00000015659	0.323301	0.133115	2.42873	0.0151518	0.226567	Serac1
ENSMUSG00000017167	0.622397	0.256291	2.42848	0.0151623	0.226567	Cntnap1
ENSMUSG00000022360	0.678884	0.279478	2.42911	0.0151358	0.226567	Atad2
ENSMUSG00000032297	0.361946	0.149013	2.42896	0.0151423	0.226567	Celf6
ENSMUSG00000035513	-0.708452	0.291769	-2.42812	0.0151771	0.226582	Ntng2
ENSMUSG00000033676	-0.544633	0.224335	-2.42777	0.015192	0.226598	Gabrb3
ENSMUSG00000053716	-0.558519	0.230162	-2.42663	0.0152398	0.227104	Dusp7
ENSMUSG00000044005	-0.606864	0.250175	-2.42575	0.0152766	0.227447	Gls2
ENSMUSG00000049001	-0.668753	0.275737	-2.42533	0.0152946	0.227509	A930038C07Rik
ENSMUSG00000040479	-0.276544	0.114126	-2.42314	0.0153868	0.228673	Dgkz
ENSMUSG00000011752	-0.299986	0.123877	-2.42164	0.0154508	0.229417	Pgam1
ENSMUSG00000031642	-0.378356	0.156284	-2.42096	0.0154797	0.229639	Sh3rf1
ENSMUSG00000075028	0.424395	0.175365	2.42006	0.0155178	0.229996	Prdm11
ENSMUSG00000020263	0.622994	0.257788	2.41669	0.0156625	0.230763	Appl2
ENSMUSG00000024042	-0.578184	0.239182	-2.41734	0.0156344	0.230763	Sik1
ENSMUSG00000032842	0.393881	0.162964	2.41699	0.0156496	0.230763	Abcc10
ENSMUSG00000033285	-0.214643	0.0887563	-2.41834	0.0155916	0.230763	Wdr3
ENSMUSG00000055493	0.328427	0.135842	2.41771	0.0156187	0.230763	Epm2a
ENSMUSG00000067995	-0.430754	0.17825	-2.41656	0.0156678	0.230763	Gtf2f2
ENSMUSG00000079254	-0.817521	0.338089	-2.41807	0.0156032	0.230763	Itprip
ENSMUSG00000038831	0.180365	0.0746583	2.41587	0.0156975	0.230994	Ralgps1
ENSMUSG00000075894	1.23472	0.511178	2.41543	0.0157166	0.231067
ENSMUSG00000052949	0.276202	0.114446	2.41338	0.0158055	0.232167	Rnf157
ENSMUSG00000079434	-1.3331	0.552927	-2.41098	0.0159096	0.233488	Neu2
ENSMUSG00000022240	-0.283441	0.117636	-2.40947	0.0159759	0.233834	Ctnnd2
ENSMUSG00000030942	-0.331281	0.137464	-2.40994	0.015955	0.233834	Thumpd1
ENSMUSG00000055540	-0.544372	0.225919	-2.40959	0.0159705	0.233834	Epha6
ENSMUSG00000051980	0.975485	0.404945	2.40893	0.0159994	0.23397	Casr
ENSMUSG00000036790	-0.567621	0.235834	-2.40687	0.01609	0.235085	Slitrk2
ENSMUSG00000050875	0.4206	0.174786	2.40637	0.016112	0.235198	A730017C20Rik
ENSMUSG00000020891	-0.996621	0.414276	-2.40569	0.0161418	0.235423	Alox8
ENSMUSG00000023092	0.235605	0.0979794	2.40464	0.0161884	0.235482	Fhl1
ENSMUSG00000026773	0.269792	0.112238	2.40376	0.0162275	0.235482	Pfkfb3
ENSMUSG00000029994	1.51006	0.628235	2.40366	0.0162317	0.235482	Anxa4
ENSMUSG00000050064	0.326017	0.135583	2.40457	0.0161917	0.235482	Zfp697
ENSMUSG00000068099	0.495926	0.206259	2.40439	0.0161997	0.235482	1500009C09Rik
ENSMUSG00000073433	-0.366588	0.152474	-2.40427	0.0162047	0.235482	Arhgdig
ENSMUSG00000008683	-0.335648	0.139738	-2.40198	0.0163068	0.235524	Rps15a
ENSMUSG00000008683	-0.335648	0.139738	-2.40198	0.0163068	0.235524	Rps15a
ENSMUSG00000021217	-0.473851	0.197267	-2.40208	0.0163023	0.235524	Tshz3
ENSMUSG00000029287	0.860937	0.358563	2.40107	0.0163471	0.235524	Tgfbr3
ENSMUSG00000029403	0.421651	0.175578	2.4015	0.0163282	0.235524	Cdkl2
ENSMUSG00000038984	-0.313668	0.130632	-2.40116	0.0163431	0.235524	Tspyl5
ENSMUSG00000058189	-1.58823	0.661327	-2.40158	0.0163242	0.235524	Hist1h2bm
ENSMUSG00000074182	-0.236768	0.0986114	-2.40102	0.0163493	0.235524	Znhit6
ENSMUSG00000088119	1.03526	0.430996	2.40201	0.0163052	0.235524
ENSMUSG00000019986	0.303469	0.126423	2.40043	0.0163756	0.235697	Ahi1
ENSMUSG00000003809	0.376734	0.157093	2.39816	0.0164776	0.236754	Gcdh
ENSMUSG00000046722	-0.338318	0.141074	-2.39816	0.0164778	0.236754	Cdc42se1
ENSMUSG00000048769	0.671538	0.280098	2.39751	0.0165068	0.236962	H1f0
ENSMUSG00000020697	0.151009	0.063004	2.39681	0.0165384	0.237209	Lig3
ENSMUSG00000049106	0.186611	0.077884	2.39601	0.0165745	0.23752	Dcaf5
ENSMUSG00000009406	0.643649	0.268866	2.39394	0.0166684	0.238658	Elk1
ENSMUSG00000029790	-0.547009	0.228529	-2.3936	0.0166837	0.238669	Tsga14
ENSMUSG00000029283	0.457288	0.191155	2.39223	0.0167462	0.239155	Cdc7
ENSMUSG00000030323	0.294822	0.123242	2.39222	0.0167468	0.239155	Ift122
ENSMUSG00000076000	0.625636	0.261776	2.38996	0.01685	0.24042
ENSMUSG00000022656	-0.490153	0.205123	-2.38956	0.0168687	0.240478	Pvrl3
ENSMUSG00000066197	1.44656	0.605514	2.38898	0.016895	0.240644	Gpr139
ENSMUSG00000055128	1.07518	0.450338	2.38751	0.0169632	0.241406	Cgrrf1
ENSMUSG00000049751	-0.40391	0.169218	-2.38692	0.0169901	0.241579	Rpl36al
ENSMUSG00000049751	-0.40391	0.169218	-2.38692	0.0169901	0.241579	Rpl36al
ENSMUSG00000086477	1.17742	0.49342	2.38624	0.0170217	0.24182	Gm15506
ENSMUSG00000011096	-0.305551	0.128101	-2.38524	0.0170681	0.24227	Akt1s1
ENSMUSG00000024150	-0.258398	0.108467	-2.38227	0.0172065	0.243851	Mcfd2
ENSMUSG00000035576	0.454396	0.190746	2.38221	0.0172092	0.243851	L3mbtl1
ENSMUSG00000022414	-0.388284	0.163059	-2.38124	0.0172543	0.244183	Tab1
ENSMUSG00000038291	-0.256884	0.107897	-2.38083	0.0172739	0.244183	Snx25
ENSMUSG00000044813	-0.573471	0.240878	-2.38076	0.0172772	0.244183	Shb
ENSMUSG00000027175	0.264417	0.111081	2.3804	0.0172938	0.244185	Tcp11l1
ENSMUSG00000044816	0.663663	0.278873	2.3798	0.0173219	0.244185	D630023F18Rik
ENSMUSG00000050022	0.541805	0.22765	2.37999	0.0173131	0.244185	Amz1
ENSMUSG00000060216	0.285114	0.119847	2.37898	0.0173608	0.244523	Arrb2
ENSMUSG00000030094	0.417181	0.175425	2.37811	0.0174018	0.244891	Xpc
ENSMUSG00000025453	0.321295	0.135169	2.37699	0.0174546	0.245215	Nnt
ENSMUSG00000033059	0.303313	0.127597	2.37711	0.0174488	0.245215	Pygb
ENSMUSG00000030718	-0.237384	0.0998839	-2.3766	0.0174728	0.245261	Ppme1
ENSMUSG00000037624	-0.291567	0.122702	-2.37621	0.0174914	0.245312	Kcnk2
ENSMUSG00000020869	-0.354798	0.149444	-2.37412	0.0175908	0.245867	Lrrc59
ENSMUSG00000038763	1.01653	0.428127	2.37436	0.0175796	0.245867	Alpk3
ENSMUSG00000040843	0.257607	0.108496	2.37434	0.0175802	0.245867	Tiprl
ENSMUSG00000045414	-0.676637	0.28494	-2.37466	0.017565	0.245867	1190002N15Rik
ENSMUSG00000034349	-0.587687	0.247841	-2.37122	0.0177293	0.247593	Smc4
ENSMUSG00000053153	1.76885	0.74617	2.37057	0.0177605	0.247818	Spag16
ENSMUSG00000001416	-0.227641	0.0960691	-2.36955	0.0178098	0.247856	Cct3
ENSMUSG00000019782	-0.377195	0.159203	-2.36926	0.0178235	0.247856	Rwdd1
ENSMUSG00000019782	-0.377195	0.159203	-2.36926	0.0178235	0.247856	Rwdd1
ENSMUSG00000024142	-0.270466	0.114141	-2.36959	0.017808	0.247856	Mlst8
ENSMUSG00000033595	0.844523	0.356316	2.37015	0.0177808	0.247856	Lgi3
ENSMUSG00000032340	-0.362419	0.153007	-2.36864	0.0178537	0.248065	Neo1
ENSMUSG00000001300	-0.236939	0.100052	-2.36815	0.0178772	0.248182	Efnb2
ENSMUSG00000034009	-0.607667	0.256681	-2.3674	0.0179133	0.248474	Rxfp1
ENSMUSG00000026632	0.466477	0.197179	2.36575	0.0179934	0.249375	Tatdn3
ENSMUSG00000023951	-0.662477	0.280075	-2.36536	0.0180127	0.249431	Vegfa
ENSMUSG00000018983	0.95872	0.405446	2.36461	0.0180492	0.249726	E2f2
ENSMUSG00000040133	0.326907	0.138328	2.36327	0.0181144	0.250417	Gpr176
ENSMUSG00000014778	0.96102	0.407091	2.3607	0.0182403	0.251512	Fhod1
ENSMUSG00000017978	-1.27463	0.539885	-2.36093	0.0182291	0.251512	Cadps2
ENSMUSG00000037772	-0.35285	0.149487	-2.36041	0.0182548	0.251512	Mrpl23
ENSMUSG00000041995	0.562247	0.23819	2.3605	0.0182502	0.251512	Zbed3
ENSMUSG00000021973	0.34028	0.144215	2.35954	0.0182978	0.251894	Efha1
ENSMUSG00000003279	-0.377917	0.160298	-2.35759	0.0183941	0.252585	Dlgap1
ENSMUSG00000032076	-0.483901	0.205238	-2.35775	0.018386	0.252585	Cadm1
ENSMUSG00000078891	-0.581689	0.246679	-2.35808	0.0183698	0.252585	Gm11008
ENSMUSG00000024420	-0.583476	0.247553	-2.35698	0.0184245	0.25279	Zfp521
ENSMUSG00000027774	-0.260086	0.110369	-2.35651	0.0184474	0.252894	Gfm1
ENSMUSG00000029776	0.395053	0.167729	2.3553	0.0185076	0.253508	Hibadh
ENSMUSG00000031358	-0.314826	0.133764	-2.3536	0.0185927	0.254462	Msl3
ENSMUSG00000031539	0.308125	0.130957	2.35287	0.0186293	0.25475	Ap3m2
ENSMUSG00000019952	-0.41123	0.175024	-2.34956	0.0187955	0.256596	Poc1b
ENSMUSG00000033530	-0.326065	0.138765	-2.34977	0.0187851	0.256596	Ttc7b
ENSMUSG00000027560	-0.538027	0.229079	-2.34865	0.0188415	0.257011	Dok5
ENSMUSG00000040037	-0.630701	0.268583	-2.34825	0.0188618	0.257074	Negr1
ENSMUSG00000002477	-0.419212	0.17863	-2.34682	0.0189345	0.257852	Snrpd1
ENSMUSG00000002477	-0.419212	0.17863	-2.34682	0.0189345	0.257852	Snrpd1
ENSMUSG00000074872	0.791241	0.337238	2.34624	0.018964	0.25804	Ctxn2
ENSMUSG00000058361	-0.734038	0.313084	-2.34454	0.0190504	0.258806	Lhfpl3
ENSMUSG00000071847	0.520229	0.221892	2.34452	0.0190518	0.258806	Apcdd1
ENSMUSG00000032245	0.499311	0.213093	2.34316	0.0191212	0.259534	Cln6
ENSMUSG00000035164	-0.64961	0.277514	-2.34082	0.0192415	0.260888	Zc3h12c
ENSMUSG00000039357	0.291977	0.124744	2.3406	0.0192527	0.260888	Fut11
ENSMUSG00000022747	-1.6058	0.686568	-2.33888	0.0193418	0.26188	St3gal6
ENSMUSG00000000560	-0.565176	0.24186	-2.33679	0.01945	0.262517	Gabra2
ENSMUSG00000038299	-0.412045	0.176327	-2.33682	0.0194484	0.262517	Wdr36
ENSMUSG00000039852	0.301685	0.129101	2.33682	0.0194486	0.262517	Rere
ENSMUSG00000048600	0.493897	0.211362	2.33674	0.0194528	0.262517	Gm5763
ENSMUSG00000020400	0.339168	0.145197	2.33592	0.0194957	0.26288	Tnip1
ENSMUSG00000037737	0.907641	0.388631	2.33548	0.0195184	0.26297	Arpm1
ENSMUSG00000028076	1.07423	0.460163	2.33445	0.0195722	0.26348	Cd1d1
ENSMUSG00000006932	-0.163723	0.0701698	-2.33324	0.0196354	0.263897	Ctnnb1
ENSMUSG00000038077	0.270494	0.115922	2.33342	0.0196261	0.263897	Kcna6
ENSMUSG00000022604	0.604614	0.259322	2.33152	0.0197259	0.264766	Cep97
ENSMUSG00000038152	-0.785933	0.337107	-2.3314	0.0197322	0.264766	5033430I15Rik
ENSMUSG00000022858	-0.567765	0.243682	-2.32994	0.0198091	0.265497	Tra2b
ENSMUSG00000028717	0.585988	0.251622	2.32884	0.0198674	0.265497	Tal1
ENSMUSG00000036995	0.811197	0.348296	2.32905	0.0198566	0.265497	Asap3
ENSMUSG00000037826	0.408239	0.175257	2.32938	0.0198391	0.265497	Ppm1k
ENSMUSG00000059005	-0.272008	0.116793	-2.32898	0.0198602	0.265497	Hnrnpa3
ENSMUSG00000059005	-0.272008	0.116793	-2.32898	0.0198602	0.265497	Hnrnpa3
ENSMUSG00000031701	-0.27009	0.116078	-2.32679	0.0199764	0.266735	Dnaja2
ENSMUSG00000037020	0.583586	0.250925	2.32574	0.0200323	0.267049	Wdr62
ENSMUSG00000037020	0.583586	0.250925	2.32574	0.0200323	0.267049	Wdr62
ENSMUSG00000090069	0.530266	0.227997	2.32575	0.0200317	0.267049	E430024P14Rik
ENSMUSG00000090069	0.530266	0.227997	2.32575	0.0200317	0.267049	D030054H15Rik
ENSMUSG00000022377	-0.411603	0.177068	-2.32455	0.0200961	0.267682	Asap1
ENSMUSG00000017778	-0.531268	0.228636	-2.32364	0.0201447	0.267705	Cox7c
ENSMUSG00000017778	-0.531268	0.228636	-2.32364	0.0201447	0.267705	Cox7c
ENSMUSG00000059436	-0.295685	0.127253	-2.3236	0.0201467	0.267705	Max
ENSMUSG00000064347	-1.5607	0.67153	-2.32409	0.0201207	0.267705	mt-Ta
ENSMUSG00000019838	0.608692	0.26206	2.32272	0.0201941	0.268119	Slc16a10
ENSMUSG00000028700	-0.251066	0.108167	-2.32109	0.0202822	0.269071	Pomgnt1
ENSMUSG00000033099	-0.347224	0.149773	-2.31834	0.0204309	0.270734	Nol12
ENSMUSG00000043903	-0.623846	0.269112	-2.31816	0.0204405	0.270734	Gm22
ENSMUSG00000027710	0.191602	0.0827071	2.31664	0.0205234	0.271176	Acad9
ENSMUSG00000029177	-1.02236	0.441269	-2.31688	0.0205105	0.271176	Cenpa
ENSMUSG00000030067	-0.487026	0.210183	-2.31715	0.0204954	0.271176	Foxp1
ENSMUSG00000020657	-0.265117	0.114463	-2.31617	0.0205491	0.271282	Dnajc27
ENSMUSG00000025027	-0.227583	0.0982701	-2.31589	0.0205644	0.271282	Xpnpep1
ENSMUSG00000049090	0.464732	0.200786	2.31456	0.020637	0.272021	Zadh2
ENSMUSG00000040972	-0.602461	0.260407	-2.31353	0.0206933	0.272251	Igsf21
ENSMUSG00000046991	0.842258	0.364088	2.31334	0.0207041	0.272251	Wdr27
ENSMUSG00000085264	1.13352	0.489882	2.31388	0.0206746	0.272251	Gm15581
ENSMUSG00000029090	0.283509	0.122597	2.31252	0.0207491	0.272475	Gpr125
ENSMUSG00000037992	-0.692315	0.299389	-2.31242	0.0207543	0.272475	Rara
ENSMUSG00000015501	-0.464167	0.200819	-2.31138	0.0208121	0.272581	Hivep2
ENSMUSG00000027304	0.166553	0.0720536	2.31152	0.0208043	0.272581	Rtf1
ENSMUSG00000032625	0.674948	0.292004	2.31143	0.0208088	0.272581	Thsd7a
ENSMUSG00000025786	-0.210709	0.0911946	-2.31054	0.0208581	0.272965	Zdhhc3
ENSMUSG00000012705	0.70823	0.306681	2.30934	0.0209246	0.273454	Retn
ENSMUSG00000030350	-0.321018	0.139013	-2.30927	0.0209287	0.273454	Prmt8
ENSMUSG00000040701	0.711937	0.308402	2.30847	0.0209728	0.273812	Ap1g2
ENSMUSG00000037965	0.307939	0.133454	2.30745	0.0210295	0.274335	Zc3h7a
ENSMUSG00000009079	-0.253238	0.109951	-2.30319	0.0212682	0.276227	Ewsr1
ENSMUSG00000013663	-0.368767	0.160095	-2.30343	0.0212546	0.276227	Pten
ENSMUSG00000029247	-0.326804	0.1419	-2.30306	0.0212754	0.276227	Paics
ENSMUSG00000039601	-0.658395	0.285845	-2.30332	0.0212606	0.276227	Rcan2
ENSMUSG00000052534	-0.409659	0.177767	-2.30448	0.021196	0.276227	Pbx1
ENSMUSG00000055116	-0.455019	0.197506	-2.30383	0.0212322	0.276227	Arntl
ENSMUSG00000035623	0.195026	0.0847065	2.30237	0.0213142	0.276513	Rsf1
ENSMUSG00000039194	0.843967	0.366632	2.30194	0.0213383	0.276607	Rlbp1
ENSMUSG00000059248	-0.361094	0.156943	-2.3008	0.0214027	0.277223	2009-09-01
ENSMUSG00000041632	0.380332	0.165331	2.30043	0.0214238	0.277278	Mrps27
ENSMUSG00000010538	-0.913788	0.397617	-2.29816	0.0215524	0.277912	1700021C14Rik
ENSMUSG00000020564	0.363334	0.158102	2.29809	0.0215567	0.277912	Atxn7l1
ENSMUSG00000044390	0.557305	0.242509	2.29808	0.0215573	0.277912	Tigd3
ENSMUSG00000045867	0.585896	0.254864	2.29886	0.0215132	0.277912	Cradd
ENSMUSG00000055633	-0.270969	0.11791	-2.2981	0.0215561	0.277912	Zfp580
ENSMUSG00000040490	-0.325259	0.141555	-2.29776	0.0215755	0.277928	Lrfn2
ENSMUSG00000043866	-0.333407	0.145149	-2.297	0.0216187	0.278267	Taf10
ENSMUSG00000022309	0.871968	0.37986	2.2955	0.0217047	0.279155	Angpt1
ENSMUSG00000009207	0.26169	0.114111	2.29329	0.0218314	0.279595	Lnp
ENSMUSG00000014748	-0.224977	0.0981067	-2.29319	0.0218372	0.279595	Tex261
ENSMUSG00000020460	-0.610677	0.266377	-2.29253	0.021875	0.279595	Rps27a
ENSMUSG00000020460	-0.610677	0.266377	-2.29253	0.021875	0.279595	Rps27a
ENSMUSG00000023806	-0.297024	0.129555	-2.29264	0.0218689	0.279595	Rsph3b
ENSMUSG00000025221	-0.471721	0.205657	-2.29373	0.0218062	0.279595	Kcnip2
ENSMUSG00000027809	-0.343624	0.149824	-2.29351	0.0218185	0.279595	Etfdh
ENSMUSG00000028708	0.289235	0.126132	2.29312	0.0218414	0.279595	Mknk1
ENSMUSG00000052126	0.945838	0.412303	2.29404	0.0217884	0.279595	Gm1604A
ENSMUSG00000075901	0.82278	0.35898	2.29199	0.021906	0.279774
ENSMUSG00000090627	2.40027	1.04749	2.29144	0.0219378	0.279963	Gm8356
ENSMUSG00000091655	-0.443453	0.193634	-2.29016	0.0220118	0.280689	Gm8741
ENSMUSG00000040140	0.493938	0.215753	2.28937	0.0220576	0.280838	Tdrd6
ENSMUSG00000084306	1.36565	0.596515	2.28938	0.0220575	0.280838	Gm11743
ENSMUSG00000014837	-0.227814	0.0995901	-2.28752	0.0221654	0.281992	4931428F04Rik
ENSMUSG00000086023	-0.564684	0.246964	-2.28651	0.0222246	0.282526	2810011L19Rik
ENSMUSG00000040548	-0.142178	0.0622232	-2.28496	0.022315	0.283455	Tex2
ENSMUSG00000092162	1.11396	0.487637	2.28441	0.0223477	0.283652	Vmn2r86
ENSMUSG00000003644	0.476288	0.208582	2.28346	0.0224034	0.28414	Rps6ka1
ENSMUSG00000049184	0.175919	0.0770512	2.28314	0.022422	0.284157	Purg
ENSMUSG00000021936	-0.344573	0.151081	-2.28071	0.0225653	0.285752	Mapk8
ENSMUSG00000028797	-0.38397	0.16839	-2.28025	0.0225932	0.285792	2510006D16Rik
ENSMUSG00000029924	0.19359	0.084905	2.28008	0.0226032	0.285792	Slc37a3
ENSMUSG00000021003	0.318919	0.139939	2.27898	0.0226683	0.286395	Galc
ENSMUSG00000044164	0.519534	0.228021	2.27845	0.0227	0.286575	Rnf182
ENSMUSG00000028518	-0.349149	0.153304	-2.2775	0.0227565	0.287067	Prkaa2
ENSMUSG00000051285	0.467627	0.205357	2.27714	0.022778	0.287118	Pcmtd1
ENSMUSG00000071073	-0.406294	0.178599	-2.27489	0.0229126	0.288593	Gm88
ENSMUSG00000037014	-0.67959	0.298815	-2.27428	0.0229491	0.28861	Sstr4
ENSMUSG00000085196	0.914957	0.402265	2.27451	0.0229351	0.28861	Gm14963
ENSMUSG00000023805	-0.538194	0.236762	-2.27314	0.0230176	0.289053	Synj2
ENSMUSG00000034614	0.667489	0.293692	2.27275	0.0230412	0.289053	Pik3ip1
ENSMUSG00000039745	0.592672	0.260751	2.27294	0.0230297	0.289053	Htatip2
ENSMUSG00000051335	-0.561235	0.246965	-2.27253	0.0230546	0.289053	Gfod1
ENSMUSG00000050132	0.283899	0.124985	2.27146	0.0231193	0.289577	Sarm1
ENSMUSG00000050830	-1.19934	0.528051	-2.27125	0.0231316	0.289577	Vwc2
ENSMUSG00000037239	-0.981059	0.432089	-2.2705	0.023177	0.289924	Spred3
ENSMUSG00000080303	-0.601096	0.264815	-2.26987	0.0232156	0.290186	Gm12419
ENSMUSG00000005481	-0.315344	0.139076	-2.26742	0.0233643	0.29071	Ddx39
ENSMUSG00000018398	-0.300736	0.132636	-2.26739	0.0233666	0.29071	2008-09-01
ENSMUSG00000022994	0.3371	0.14863	2.26805	0.0233261	0.29071	Adcy6
ENSMUSG00000029657	-0.610527	0.269148	-2.26837	0.0233069	0.29071	Hsph1
ENSMUSG00000033430	0.311692	0.137517	2.26657	0.0234167	0.29071	Terf2ip
ENSMUSG00000033453	-0.848766	0.374459	-2.26665	0.0234119	0.29071	Adamts15
ENSMUSG00000042632	0.382339	0.16868	2.26665	0.0234118	0.29071	Pla2g6
ENSMUSG00000050786	0.428575	0.188922	2.26853	0.0232966	0.29071	Ccdc126
ENSMUSG00000087819	-0.737304	0.32513	-2.26772	0.0233463	0.29071
ENSMUSG00000023967	-0.290023	0.128052	-2.26489	0.0235192	0.290884	Mrps18a
ENSMUSG00000039706	-0.964212	0.425616	-2.26545	0.0234851	0.290884	Ldb2
ENSMUSG00000052155	-0.436526	0.192725	-2.26501	0.0235119	0.290884	Acvr2a
ENSMUSG00000066643	0.271771	0.11997	2.26533	0.0234924	0.290884	Wdr35
ENSMUSG00000092100	1.2637	0.557862	2.26525	0.0234972	0.290884	4930544I03Rik
ENSMUSG00000037606	0.333711	0.147382	2.26425	0.0235586	0.291153	Osbpl5
ENSMUSG00000091625	-0.748974	0.330844	-2.26383	0.0235846	0.291254	Lsm5
ENSMUSG00000091625	-0.748974	0.330844	-2.26383	0.0235846	0.291254	Lsm5
ENSMUSG00000026245	-0.232916	0.102954	-2.26234	0.0236766	0.291937	Farsb
ENSMUSG00000031523	-0.350183	0.154807	-2.26207	0.0236931	0.291937	Dlc1
ENSMUSG00000033159	0.280171	0.123836	2.26244	0.0236703	0.291937	1810031K17Rik
ENSMUSG00000000568	-0.39862	0.176323	-2.26073	0.0237758	0.291945	Hnrnpd
ENSMUSG00000020175	0.417671	0.184711	2.26122	0.0237458	0.291945	Rab36
ENSMUSG00000026095	-0.311103	0.137617	-2.26065	0.023781	0.291945	Asnsd1
ENSMUSG00000047146	0.423478	0.187328	2.26062	0.0237826	0.291945	Tet1
ENSMUSG00000062198	0.388523	0.171806	2.2614	0.0237342	0.291945	2700097O09Rik
ENSMUSG00000068263	0.614644	0.272165	2.25835	0.0239238	0.293459	Ccdc48
ENSMUSG00000003546	0.352127	0.15603	2.25679	0.0240214	0.294394	Klc4
ENSMUSG00000030871	-0.375311	0.166336	-2.25634	0.0240494	0.294394	Ears2
ENSMUSG00000031374	-0.754458	0.334383	-2.25627	0.0240537	0.294394	Zfp92
ENSMUSG00000029649	-0.251518	0.111531	-2.25515	0.0241238	0.294812	Pomp
ENSMUSG00000063200	-0.436509	0.193538	-2.25542	0.0241069	0.294812	Nol7
ENSMUSG00000022622	0.873249	0.387323	2.25457	0.0241601	0.295037	Acr
ENSMUSG00000034452	1.34739	0.598026	2.25306	0.0242554	0.295776	Slc24a1
ENSMUSG00000064487	1.18769	0.527152	2.25304	0.0242566	0.295776
ENSMUSG00000040752	0.669741	0.297336	2.25247	0.0242923	0.295797	Myh6
ENSMUSG00000058174	0.609884	0.270774	2.25237	0.0242989	0.295797	Gm5148
ENSMUSG00000089789	0.865718	0.384395	2.25216	0.0243123	0.295797	Rdh1
ENSMUSG00000000631	0.350075	0.155523	2.25095	0.024389	0.296291	Myo18a
ENSMUSG00000021958	-0.386632	0.171756	-2.25105	0.0243821	0.296291	Pinx1
ENSMUSG00000002107	-0.33194	0.147565	-2.24945	0.0244841	0.297227	Celf2
ENSMUSG00000033308	-0.385472	0.171404	-2.2489	0.0245186	0.297427	Dpyd
ENSMUSG00000041453	-0.375797	0.167127	-2.24858	0.0245394	0.297459	Rpl21
ENSMUSG00000041453	-0.375797	0.167127	-2.24858	0.0245394	0.297459	Rpl21
ENSMUSG00000041453	-0.375797	0.167127	-2.24858	0.0245394	0.297459	Rpl21
ENSMUSG00000041453	-0.375797	0.167127	-2.24858	0.0245394	0.297459	Rpl21
ENSMUSG00000041453	-0.375797	0.167127	-2.24858	0.0245394	0.297459	Rpl21
ENSMUSG00000041453	-0.375797	0.167127	-2.24858	0.0245394	0.297459	Rpl21
ENSMUSG00000041453	-0.375797	0.167127	-2.24858	0.0245394	0.297459	Rpl21
ENSMUSG00000041453	-0.375797	0.167127	-2.24858	0.0245394	0.297459	Rpl21
ENSMUSG00000022816	-0.639832	0.284718	-2.24725	0.0246239	0.298263	Fstl1
ENSMUSG00000009378	1.3792	0.613863	2.24676	0.0246554	0.298424	Slc16a12
ENSMUSG00000054162	-0.589166	0.26247	-2.2447	0.0247873	0.2998	Spock3
ENSMUSG00000026678	0.690604	0.307702	2.24439	0.0248071	0.29982	Rgs5
ENSMUSG00000024457	0.381604	0.170088	2.24357	0.02486	0.300238	Trim26
ENSMUSG00000012609	0.402211	0.179362	2.24245	0.024932	0.300887	Ttll5
ENSMUSG00000017132	0.313215	0.139726	2.24163	0.0249854	0.30131	Cyth1
ENSMUSG00000011254	-0.375126	0.16738	-2.24117	0.0250151	0.301446	Thg1l
ENSMUSG00000029413	0.667489	0.297891	2.24072	0.0250445	0.301466	Naaa
ENSMUSG00000039671	0.368259	0.164359	2.24058	0.0250534	0.301466	Zmynd8
ENSMUSG00000020844	0.483397	0.215854	2.23946	0.0251258	0.301902	Nxn
ENSMUSG00000037443	0.484398	0.216302	2.23945	0.0251263	0.301902	Ccdc21
ENSMUSG00000039809	-0.327638	0.146336	-2.23894	0.0251595	0.30208	Gabbr2
ENSMUSG00000073538	0.835978	0.373692	2.23708	0.0252813	0.30332	E330020D12Rik
ENSMUSG00000030852	0.198307	0.0887003	2.2357	0.0253714	0.303736	Tacc2
ENSMUSG00000038011	0.689331	0.30828	2.23606	0.0253482	0.303736	Dnahc10
ENSMUSG00000047881	-0.502426	0.224709	-2.2359	0.0253584	0.303736	Rell1
ENSMUSG00000032352	-0.546682	0.244786	-2.23331	0.0255286	0.304952	Lrrc1
ENSMUSG00000041653	0.582951	0.260999	2.23353	0.0255137	0.304952	Pnpla3
ENSMUSG00000053483	0.273013	0.122229	2.23362	0.0255081	0.304952	Usp21
ENSMUSG00000024548	-0.367842	0.164948	-2.23005	0.0257444	0.307306	Setbp1
ENSMUSG00000046324	0.361861	0.162319	2.22933	0.0257922	0.307653	Ermp1
ENSMUSG00000022863	-0.530131	0.237891	-2.22846	0.0258496	0.30777	Btg3
ENSMUSG00000029836	-0.248231	0.111421	-2.22787	0.0258892	0.30777	Cbx3
ENSMUSG00000029836	-0.248231	0.111421	-2.22787	0.0258892	0.30777	Cbx3
ENSMUSG00000029836	-0.248231	0.111421	-2.22787	0.0258892	0.30777	Cbx3
ENSMUSG00000041556	0.673521	0.302184	2.22884	0.0258243	0.30777	Fbxo2
ENSMUSG00000050836	-1.10419	0.495649	-2.22777	0.0258956	0.30777	Ntng1
ENSMUSG00000064036	0.617242	0.27701	2.22823	0.0258649	0.30777	Mro
ENSMUSG00000032348	0.650882	0.292284	2.22689	0.0259549	0.308101	Gsta4
ENSMUSG00000038677	0.522492	0.234645	2.22673	0.0259653	0.308101	Scube3
ENSMUSG00000047712	-0.630326	0.283136	-2.22624	0.0259984	0.308101	Ust
ENSMUSG00000078700	-0.345851	0.155346	-2.22633	0.0259923	0.308101	D030028A08Rik
ENSMUSG00000066233	-0.397098	0.178431	-2.2255	0.0260475	0.308461	Tmem42
ENSMUSG00000022763	0.851482	0.382667	2.22513	0.0260727	0.308537	Aifm3
ENSMUSG00000030022	0.813021	0.365441	2.22477	0.0260968	0.3086	Adamts9
ENSMUSG00000005125	-0.274724	0.123587	-2.22291	0.0262219	0.309566	Ndrg1
ENSMUSG00000011832	0.25733	0.115773	2.22271	0.026235	0.309566	Evi5l
ENSMUSG00000011832	0.25733	0.115773	2.22271	0.026235	0.309566	Evi5l
ENSMUSG00000031103	-1.03661	0.466268	-2.22321	0.0262018	0.309566	Elf4
ENSMUSG00000054934	-0.322707	0.145333	-2.22046	0.0263874	0.31114	Kcnmb4
ENSMUSG00000025931	-0.41106	0.185155	-2.22009	0.0264128	0.311217	Paqr8
ENSMUSG00000031605	-0.26438	0.119122	-2.21941	0.026459	0.311537	Klhl2
ENSMUSG00000014932	-0.580679	0.261856	-2.21755	0.0265854	0.312023	Yes1
ENSMUSG00000031575	0.210621	0.094985	2.21741	0.0265952	0.312023	Ash2l
ENSMUSG00000032565	0.381953	0.172221	2.21781	0.0265681	0.312023	Nudt16
ENSMUSG00000042148	-0.24272	0.10945	-2.21764	0.0265794	0.312023	Cox10
ENSMUSG00000092187	0.908145	0.409532	2.21752	0.0265875	0.312023	Gm20457
ENSMUSG00000022338	-0.351626	0.158608	-2.21695	0.0266266	0.31217	Eny2
ENSMUSG00000040703	0.74961	0.338343	2.21553	0.0267235	0.312859	Cyp2s1
ENSMUSG00000060548	0.322155	0.145405	2.21557	0.0267211	0.312859	Tnfrsf19
ENSMUSG00000035726	-0.162759	0.0734839	-2.21489	0.0267673	0.31294	Supt16h
ENSMUSG00000044794	0.453817	0.204895	2.21488	0.0267684	0.31294	9330133O14Rik
ENSMUSG00000029608	-0.923119	0.417082	-2.21328	0.0268784	0.314002	Rph3a
ENSMUSG00000075841	1.00948	0.456201	2.2128	0.0269115	0.314165
ENSMUSG00000030315	-0.489311	0.221179	-2.21229	0.0269468	0.314354	Vgll4
ENSMUSG00000061458	-0.178878	0.0808836	-2.21155	0.026998	0.314728	Nol10
ENSMUSG00000018848	-0.286038	0.129404	-2.21042	0.0270759	0.315331	Rars
ENSMUSG00000027404	-0.320456	0.145001	-2.21003	0.0271029	0.315331	Snrpb
ENSMUSG00000027679	-0.58991	0.266931	-2.20997	0.0271073	0.315331	Dnajc19
ENSMUSG00000027679	-0.58991	0.266931	-2.20997	0.0271073	0.315331	Dnajc19
ENSMUSG00000035578	0.538454	0.24372	2.20932	0.0271526	0.315634	Iqcg
ENSMUSG00000018196	-0.466905	0.211393	-2.20871	0.0271947	0.315901	Glrx2
ENSMUSG00000006589	-0.366715	0.166265	-2.20561	0.0274115	0.316406	Aprt
ENSMUSG00000014303	0.338125	0.153221	2.20678	0.0273297	0.316406	Glis2
ENSMUSG00000041438	-0.330629	0.149851	-2.20638	0.0273571	0.316406	Cirh1a
ENSMUSG00000041841	-0.331523	0.150258	-2.20636	0.0273587	0.316406	Rpl37
ENSMUSG00000041841	-0.331523	0.150258	-2.20636	0.0273587	0.316406	Rpl37
ENSMUSG00000044937	-0.624451	0.283119	-2.20562	0.0274108	0.316406	BC030307
ENSMUSG00000047153	0.499477	0.226255	2.20758	0.0272733	0.316406	Khnyn
ENSMUSG00000057649	0.224872	0.101939	2.20594	0.027388	0.316406	Brd9
ENSMUSG00000073678	-0.425914	0.193072	-2.20599	0.0273848	0.316406	Pgap1
ENSMUSG00000075995	0.676792	0.306818	2.20584	0.0273952	0.316406
ENSMUSG00000037572	0.439149	0.199179	2.20479	0.0274686	0.316843	Wdhd1
ENSMUSG00000021917	-0.344985	0.156516	-2.20415	0.0275138	0.317142	Spcs1
ENSMUSG00000000275	0.746935	0.339073	2.20287	0.0276036	0.317897	Trim25
ENSMUSG00000040875	-0.315631	0.143318	-2.20231	0.0276436	0.317897	Osbpl10
ENSMUSG00000048612	-1.18693	0.538992	-2.20212	0.0276566	0.317897	Myof
ENSMUSG00000062591	0.287623	0.130588	2.20251	0.0276292	0.317897	Tubb4a
ENSMUSG00000027669	-0.491851	0.223457	-2.2011	0.0277293	0.318231	Gnb4
ENSMUSG00000027993	0.243748	0.11075	2.20089	0.0277438	0.318231	Trim2
ENSMUSG00000090907	1.55847	0.708068	2.20101	0.0277351	0.318231	C030017D09Rik
ENSMUSG00000024347	0.298731	0.135874	2.19859	0.0279069	0.318988	Psd2
ENSMUSG00000030655	0.339929	0.154571	2.19918	0.0278649	0.318988	Smg1
ENSMUSG00000040877	0.354962	0.161426	2.19892	0.0278836	0.318988	Wdr25
ENSMUSG00000048279	0.37392	0.170071	2.19861	0.0279055	0.318988	Sacs
ENSMUSG00000055271	-0.92268	0.419607	-2.19891	0.0278841	0.318988	9330161L09Rik
ENSMUSG00000022620	0.318795	0.145053	2.19779	0.0279641	0.319421	Arsa
ENSMUSG00000075592	0.419736	0.191063	2.19685	0.028031	0.319962	Nynrin
ENSMUSG00000091349	1.34587	0.612729	2.19652	0.028055	0.320014	Gm7349
ENSMUSG00000063430	-0.470374	0.214188	-2.19608	0.0280864	0.32015	Wscd2
ENSMUSG00000031365	-0.461525	0.210226	-2.19538	0.0281365	0.320277	Zfp275
ENSMUSG00000040112	-0.300977	0.137095	-2.1954	0.0281351	0.320277	Mrps35
ENSMUSG00000021097	0.371008	0.169072	2.19438	0.0282083	0.32036	Clmn
ENSMUSG00000022545	0.404521	0.18436	2.19419	0.0282218	0.32036	Ercc4
ENSMUSG00000029095	0.25321	0.11536	2.19495	0.0281674	0.32036	Ablim2
ENSMUSG00000059495	0.193261	0.088073	2.19432	0.0282122	0.32036	Arhgef12
ENSMUSG00000021069	0.4981	0.227291	2.19146	0.0284186	0.320828	Pygl
ENSMUSG00000022426	-0.207797	0.0948217	-2.19145	0.0284192	0.320828	Josd1
ENSMUSG00000022426	-0.207797	0.0948217	-2.19145	0.0284192	0.320828	Josd1
ENSMUSG00000026019	-0.342797	0.15642	-2.19151	0.0284146	0.320828	Wdr12
ENSMUSG00000027799	-0.271934	0.124006	-2.19292	0.0283132	0.320828	Nbea
ENSMUSG00000033278	-0.740455	0.337867	-2.19156	0.0284114	0.320828	Ptprm
ENSMUSG00000055723	-0.255936	0.116711	-2.19291	0.0283141	0.320828	Rras2
ENSMUSG00000061013	0.47361	0.216073	2.1919	0.028387	0.320828	Mkx
ENSMUSG00000092903	1.243	0.566991	2.19228	0.0283595	0.320828
ENSMUSG00000021243	-0.401456	0.183298	-2.19019	0.0285106	0.321419	Fcf1
ENSMUSG00000021243	-0.401456	0.183298	-2.19019	0.0285106	0.321419	Fcf1
ENSMUSG00000034664	0.66865	0.305288	2.19023	0.0285076	0.321419	Itga2b
ENSMUSG00000020258	-0.426134	0.194699	-2.18868	0.0286199	0.322071	Glyctk
ENSMUSG00000025370	-0.727548	0.332436	-2.18854	0.0286306	0.322071	Cdh9
ENSMUSG00000025393	-0.185471	0.0847372	-2.18877	0.0286133	0.322071	Atp5b
ENSMUSG00000051329	-0.282862	0.12926	-2.18831	0.0286468	0.322071	Nup160
ENSMUSG00000038679	-0.67458	0.308474	-2.18683	0.0287551	0.323068	Trps1
ENSMUSG00000058454	0.381576	0.174575	2.18574	0.0288347	0.323741	Dhcr7
ENSMUSG00000043391	-0.378642	0.173357	-2.18418	0.0289488	0.3248	2510009E07Rik
ENSMUSG00000036403	0.329561	0.150913	2.18379	0.0289777	0.324902	Cep135
ENSMUSG00000025401	1.02118	0.467889	2.18253	0.0290703	0.325303	Myo1a
ENSMUSG00000038530	-0.724003	0.33169	-2.18277	0.0290527	0.325303	Rgs4
ENSMUSG00000057789	0.325535	0.149157	2.1825	0.0290729	0.325303	Bak1
ENSMUSG00000037752	0.581925	0.266684	2.18207	0.0291042	0.325432	Xkr8
ENSMUSG00000002416	-0.419835	0.192628	-2.17951	0.0292938	0.327107	Ndufb2
ENSMUSG00000031328	0.489706	0.224666	2.17971	0.029279	0.327107	Flna
ENSMUSG00000049511	-0.910774	0.417991	-2.17893	0.0293366	0.327363	Htr1b
ENSMUSG00000020430	-0.241305	0.110767	-2.17849	0.0293694	0.327507	Pes1
ENSMUSG00000039335	1.10067	0.5055	2.17738	0.0294523	0.328209	Spata16
ENSMUSG00000032532	-1.05339	0.484527	-2.17405	0.0297014	0.328371	Cck
ENSMUSG00000036196	0.650352	0.29895	2.17546	0.029596	0.328371	Slc26a8
ENSMUSG00000037235	0.423761	0.194719	2.17628	0.0295347	0.328371	Mxd4
ENSMUSG00000044341	-0.308311	0.1417	-2.1758	0.0295704	0.328371	Gm5601
ENSMUSG00000052957	-0.678095	0.311895	-2.17411	0.0296967	0.328371	Gas1
ENSMUSG00000055763	-0.611155	0.280841	-2.17616	0.0295432	0.328371	Gm6910
ENSMUSG00000070880	-0.944301	0.434365	-2.17398	0.0297066	0.328371	Gad1
ENSMUSG00000084372	0.907686	0.417402	2.17461	0.0296594	0.328371	Gm13988
ENSMUSG00000085769	0.687697	0.316174	2.17506	0.0296256	0.328371	D230017M19Rik
ENSMUSG00000088929	-1.04063	0.478303	-2.17567	0.0295797	0.328371
ENSMUSG00000090944	1.32946	0.610937	2.17609	0.0295482	0.328371	Gm17513
ENSMUSG00000091094	0.839784	0.38612	2.17493	0.0296354	0.328371	Gm9222
ENSMUSG00000002280	-0.245667	0.113045	-2.17318	0.0297667	0.328814	Narfl
ENSMUSG00000042249	-0.424099	0.195253	-2.17205	0.0298519	0.329103	Adrbk2
ENSMUSG00000044707	0.845241	0.389195	2.17177	0.029873	0.329103	Ccnjl
ENSMUSG00000050043	0.261574	0.120439	2.17184	0.0298676	0.329103	Tmx2
ENSMUSG00000075755	0.529382	0.243672	2.17252	0.0298163	0.329103
ENSMUSG00000022836	-1.03606	0.47719	-2.17118	0.0299178	0.32912	Mylk
ENSMUSG00000055737	0.692613	0.318989	2.17127	0.0299105	0.32912	Ghr
ENSMUSG00000087184	-0.549749	0.253229	-2.17095	0.0299346	0.32912	Gm11650
ENSMUSG00000032649	-0.706035	0.325269	-2.17062	0.02996	0.329179	Glt25d2
ENSMUSG00000004980	-0.328757	0.151514	-2.1698	0.0300218	0.329638	Hnrnpa2b1
ENSMUSG00000004980	-0.328757	0.151514	-2.1698	0.0300218	0.329638	Hnrnpa2b1
ENSMUSG00000031310	0.1623	0.0748432	2.16854	0.0301178	0.330251	Zmym3
ENSMUSG00000060166	-0.220879	0.101851	-2.16864	0.0301103	0.330251	Zdhhc8
ENSMUSG00000021546	-0.302556	0.139621	-2.16698	0.0302366	0.331333	Hnrnpk
ENSMUSG00000029454	-0.264112	0.121905	-2.16655	0.0302695	0.331472	Mapkapk5
ENSMUSG00000028343	-0.573621	0.264843	-2.16589	0.0303197	0.331801	Erp44
ENSMUSG00000022205	-0.38675	0.178699	-2.16425	0.0304452	0.33254	Sub1
ENSMUSG00000036856	0.39191	0.181044	2.16472	0.0304088	0.33254	Wnt4
ENSMUSG00000091502	1.27264	0.588038	2.16421	0.030448	0.33254	Gm17293
ENSMUSG00000004565	0.236678	0.109466	2.16211	0.0306093	0.333918	Pnpla6
ENSMUSG00000027692	0.173868	0.0804183	2.16204	0.0306148	0.333918	Tnik
ENSMUSG00000039106	0.388123	0.179551	2.16163	0.0306469	0.334047	Htr5a
ENSMUSG00000000276	0.262379	0.1216	2.15772	0.0309499	0.336308	Dgke
ENSMUSG00000021178	-0.166084	0.0769405	-2.1586	0.0308812	0.336308	Psmc1
ENSMUSG00000033684	0.370574	0.171757	2.15754	0.0309633	0.336308	Qsox1
ENSMUSG00000065979	0.383971	0.177933	2.15796	0.0309312	0.336308	Cpped1
ENSMUSG00000068740	0.238441	0.110524	2.15737	0.030977	0.336308	Celsr2
ENSMUSG00000079507	0.621501	0.288047	2.15764	0.0309558	0.336308	H2-Q1
ENSMUSG00000071424	-0.510315	0.23659	-2.15696	0.0310087	0.336429	Grid2
ENSMUSG00000057228	-0.895416	0.415215	-2.15651	0.0310438	0.336588	Aadat
ENSMUSG00000040811	0.441357	0.204733	2.15577	0.0311017	0.336993	Eml2
ENSMUSG00000020963	-0.653536	0.303258	-2.15505	0.0311582	0.337383	Tshr
ENSMUSG00000031987	-0.255235	0.118458	-2.15464	0.0311898	0.337503	Egln1
ENSMUSG00000021260	0.496426	0.23056	2.15313	0.0313082	0.33788	Hhipl1
ENSMUSG00000021549	-0.442918	0.205807	-2.1521	0.0313891	0.33788	Rasa1
ENSMUSG00000022234	-0.243173	0.112919	-2.15351	0.0312784	0.33788	Cct5
ENSMUSG00000030089	0.386911	0.179734	2.15268	0.0313436	0.33788	Slc41a3
ENSMUSG00000045973	0.304824	0.141562	2.15329	0.0312959	0.33788	Mcart1
ENSMUSG00000051065	-0.361067	0.167708	-2.15295	0.0313225	0.33788	1600021P15Rik
ENSMUSG00000060402	-0.466974	0.216972	-2.15223	0.0313794	0.33788	Chst8
ENSMUSG00000087189	-0.348814	0.162073	-2.1522	0.0313814	0.33788	D130017N08Rik
ENSMUSG00000073514	-0.248846	0.115649	-2.15173	0.0314186	0.337976	Dok6
ENSMUSG00000026626	-0.385561	0.179341	-2.14988	0.0315647	0.338883	Ppp2r5a
ENSMUSG00000044033	0.576507	0.268131	2.15009	0.0315478	0.338883	Ccdc141
ENSMUSG00000045636	0.595012	0.276718	2.15024	0.0315359	0.338883	Mtus1
ENSMUSG00000033735	0.557228	0.259226	2.14959	0.0315879	0.338911	Spr
ENSMUSG00000019487	-1.14399	0.532283	-2.14922	0.0316167	0.338967	Trip10
ENSMUSG00000041115	0.237265	0.110407	2.149	0.0316344	0.338967	Iqsec2
ENSMUSG00000081692	1.6104	0.749624	2.14828	0.0316913	0.339355	Gm15971
ENSMUSG00000030757	0.439016	0.204433	2.14748	0.0317549	0.339815	Zkscan2
ENSMUSG00000072949	0.555337	0.258645	2.1471	0.0317856	0.339921	Acot1
ENSMUSG00000003814	-0.361809	0.168576	-2.14626	0.0318519	0.340409	Calr
ENSMUSG00000009733	0.278011	0.129622	2.14479	0.03197	0.341228	Tfcp2
ENSMUSG00000064030	-0.34799	0.162238	-2.14493	0.0319585	0.341228	Wibg
ENSMUSG00000047507	0.495682	0.231269	2.14331	0.0320882	0.342267	Baiap3
ENSMUSG00000022770	-0.460227	0.214785	-2.14273	0.0321349	0.342321	Dlg1
ENSMUSG00000032332	-0.663644	0.309718	-2.14273	0.0321345	0.342321	Col12a1
ENSMUSG00000022562	0.297225	0.138845	2.14069	0.032299	0.343431	Oplah
ENSMUSG00000032202	1.01303	0.473233	2.14066	0.0323018	0.343431	Rab27a
ENSMUSG00000066357	0.404571	0.18895	2.14115	0.0322618	0.343431	Wdr6
ENSMUSG00000024140	-0.924667	0.432152	-2.13968	0.0323807	0.344047	Epas1
ENSMUSG00000024384	-0.178051	0.0832829	-2.1379	0.0325247	0.344647	Iws1
ENSMUSG00000025157	-0.201217	0.0941356	-2.13752	0.0325558	0.344647	Zdhhc16
ENSMUSG00000041180	-0.597486	0.279482	-2.13784	0.0325301	0.344647	Hectd2
ENSMUSG00000054408	-0.395611	0.185087	-2.13743	0.0325629	0.344647	Spcs3
ENSMUSG00000056133	1.15007	0.537939	2.13792	0.0325236	0.344647	Gm9992
ENSMUSG00000063297	-0.622234	0.291071	-2.13774	0.0325382	0.344647	Luzp2
ENSMUSG00000048707	0.404605	0.189325	2.13709	0.0325905	0.344717	Tprn
ENSMUSG00000029875	-0.389551	0.182416	-2.13551	0.0327194	0.345857	AI836003
ENSMUSG00000006784	0.607322	0.284514	2.13459	0.0327941	0.346425	Ttc25
ENSMUSG00000000776	-0.187357	0.0878695	-2.13222	0.0329886	0.348181	Polr3d
ENSMUSG00000018166	0.973422	0.456598	2.1319	0.0330147	0.348181	Erbb3
ENSMUSG00000026482	0.309582	0.145256	2.13128	0.0330663	0.348181	Rgl1
ENSMUSG00000037735	-0.45994	0.215804	-2.13129	0.0330653	0.348181	2810032G03Rik
ENSMUSG00000037973	0.959468	0.450109	2.13164	0.0330368	0.348181	Ccdc129
ENSMUSG00000025364	-0.379681	0.178194	-2.13072	0.0331125	0.348385	Pa2g4
ENSMUSG00000029167	-0.455957	0.214024	-2.1304	0.0331384	0.348385	Ppargc1a
ENSMUSG00000075781	0.848886	0.398536	2.13001	0.0331704	0.348385
ENSMUSG00000091137	1.29488	0.607874	2.13017	0.0331573	0.348385	Gm1153
ENSMUSG00000028226	-0.335388	0.157503	-2.1294	0.0332211	0.34854	Mmp16
ENSMUSG00000040857	-0.621151	0.291713	-2.12932	0.0332276	0.34854	Erf
ENSMUSG00000021144	-0.173809	0.081694	-2.12756	0.0333732	0.349844	Mta1
ENSMUSG00000002031	0.245045	0.115228	2.12661	0.0334525	0.350026	Ift46
ENSMUSG00000025420	0.47349	0.222636	2.12675	0.0334412	0.350026	Katnal2
ENSMUSG00000035506	0.702873	0.330517	2.12659	0.0334545	0.350026	Slc12a8
ENSMUSG00000064655	-0.746528	0.351112	-2.12618	0.0334879	0.350153
ENSMUSG00000022018	-1.27062	0.597878	-2.12521	0.0335692	0.350557	1190002H23Rik
ENSMUSG00000054277	0.231894	0.109113	2.12527	0.0335645	0.350557	Arfgap3
ENSMUSG00000082195	0.653008	0.307335	2.12474	0.033608	0.350739	Gm13034
ENSMUSG00000048332	-0.630969	0.29721	-2.12297	0.033756	0.352061	Lhfp
ENSMUSG00000006241	0.381052	0.179523	2.12258	0.0337893	0.352184	Ccdc159
ENSMUSG00000046178	-0.765889	0.361008	-2.12153	0.0338775	0.35288	Nxph1
ENSMUSG00000019146	0.366337	0.172734	2.12081	0.0339375	0.353057	Cacng2
ENSMUSG00000028975	0.200505	0.0945306	2.12106	0.0339167	0.353057	Pex14
ENSMUSG00000015829	-0.960456	0.453069	-2.11989	0.0340154	0.353644	Tnr
ENSMUSG00000015944	0.386245	0.182328	2.11841	0.0341407	0.354498	Gatsl2
ENSMUSG00000029455	0.331902	0.156671	2.11846	0.0341359	0.354498	Aldh2
ENSMUSG00000029426	0.20423	0.096444	2.1176	0.0342088	0.354981	Scarb2
ENSMUSG00000001642	-0.278386	0.131539	-2.11638	0.0343121	0.355258	Akr1b3
ENSMUSG00000026842	0.318372	0.150439	2.11629	0.0343204	0.355258	Abl1
ENSMUSG00000036422	0.589191	0.27841	2.11627	0.0343219	0.355258	Pcdh8
ENSMUSG00000069565	-0.260048	0.122871	-2.11643	0.0343082	0.355258	Dazap1
ENSMUSG00000015305	-0.388758	0.183762	-2.11555	0.034383	0.355666	Sash1
ENSMUSG00000000078	-0.344397	0.162819	-2.11521	0.0344121	0.355743	Klf6
ENSMUSG00000022895	-0.501951	0.237389	-2.11446	0.0344757	0.355953	Ets2
ENSMUSG00000027854	0.125372	0.0592885	2.11461	0.034463	0.355953	Sike1
ENSMUSG00000057387	1.10676	0.523959	2.1123	0.0346609	0.35764	4922502B01Rik
ENSMUSG00000024529	-1.4941	0.707428	-2.11202	0.0346848	0.357662	Lox
ENSMUSG00000005813	-0.184186	0.0872282	-2.11154	0.0347261	0.357864	Metap1
ENSMUSG00000034544	-0.515153	0.244064	-2.11073	0.0347954	0.358353	Rsrc1
ENSMUSG00000003534	0.256676	0.121649	2.10997	0.034861	0.35837	Ddr1
ENSMUSG00000022701	0.525507	0.249142	2.10927	0.0349217	0.35837	2610015P09Rik
ENSMUSG00000026185	0.521861	0.24733	2.10998	0.0348601	0.35837	Igfbp5
ENSMUSG00000031134	-0.35608	0.168798	-2.10951	0.034901	0.35837	Rbmx
ENSMUSG00000031714	0.543506	0.257599	2.10989	0.0348676	0.35837	Gab1
ENSMUSG00000078813	0.546535	0.25914	2.10903	0.0349419	0.35837	Leng1
ENSMUSG00000086448	0.565258	0.268029	2.10894	0.0349497	0.35837	9330162012Rik
ENSMUSG00000000305	-0.609179	0.288912	-2.10853	0.0349852	0.358381	Cdh4
ENSMUSG00000019874	-0.515613	0.244578	-2.10817	0.0350161	0.358381	Fabp7
ENSMUSG00000029076	-0.247017	0.117163	-2.10832	0.0350033	0.358381	Sdf4
ENSMUSG00000078974	-0.443985	0.210685	-2.10734	0.0350881	0.358894	Sec61g
ENSMUSG00000078974	-0.443985	0.210685	-2.10734	0.0350881	0.358894	Sec61g
ENSMUSG00000078974	-0.443985	0.210685	-2.10734	0.0350881	0.358894	Sec61g
ENSMUSG00000078974	-0.443985	0.210685	-2.10734	0.0350881	0.358894	Sec61g
ENSMUSG00000078974	-0.443985	0.210685	-2.10734	0.0350881	0.358894	Sec61g
ENSMUSG00000036611	-0.876262	0.4159	-2.10691	0.0351256	0.359054	Eepd1
ENSMUSG00000039987	-0.249923	0.11868	-2.10586	0.0352163	0.359344	Phtf2
ENSMUSG00000043456	-0.829246	0.393701	-2.10628	0.0351798	0.359344	Zfp536
ENSMUSG00000071691	0.350933	0.166649	2.10583	0.0352195	0.359344	Gm960
ENSMUSG00000034796	-0.65187	0.309603	-2.10551	0.0352473	0.359404	Cpne7
ENSMUSG00000078572	-0.455095	0.216194	-2.10503	0.0352887	0.359603	1810043H04Rik
ENSMUSG00000063873	-0.442134	0.210097	-2.10443	0.0353409	0.35969	Slc24a3
ENSMUSG00000091919	0.5337	0.253593	2.10456	0.0353298	0.35969	Gm17470
ENSMUSG00000022376	-0.427542	0.203365	-2.10234	0.0355233	0.361124	Adcy8
ENSMUSG00000038014	-0.224442	0.106772	-2.10207	0.0355468	0.361124	Fam120a
ENSMUSG00000042729	-0.302852	0.144074	-2.10206	0.0355478	0.361124	Wdr74
ENSMUSG00000020484	-0.257415	0.122477	-2.10174	0.0355758	0.361168	Xbp1
ENSMUSG00000032718	0.838781	0.399132	2.10151	0.0355961	0.361168	Mansc1
ENSMUSG00000008438	1.05939	0.504293	2.10073	0.0356643	0.361637	Adam21
ENSMUSG00000010044	0.44547	0.212122	2.10007	0.0357227	0.361783	Zmynd10
ENSMUSG00000021696	-0.621636	0.295983	-2.10024	0.0357076	0.361783	Elovl7
ENSMUSG00000026074	0.257709	0.122735	2.09973	0.0357527	0.361864	Map4k4
ENSMUSG00000022312	-0.244227	0.116357	-2.09894	0.0358218	0.36234	Eif3h
ENSMUSG00000028630	-0.278669	0.132793	-2.09853	0.0358588	0.362491	Dyrk2
ENSMUSG00000090210	0.581217	0.277159	2.09705	0.0359891	0.363585	Itga10
ENSMUSG00000006678	-0.37401	0.178431	-2.0961	0.0360733	0.363866	Pola1
ENSMUSG00000020895	-0.459598	0.219275	-2.09599	0.0360834	0.363866	Tmem107
ENSMUSG00000049502	0.671519	0.320368	2.09609	0.0360742	0.363866	Dtx3l
ENSMUSG00000020956	0.351172	0.167593	2.09539	0.0361367	0.363957	6530401N04Rik
ENSMUSG00000031974	0.356262	0.170019	2.09542	0.0361336	0.363957	Abcb10
ENSMUSG00000073455	0.28819	0.137584	2.09464	0.0362026	0.363957	Gm3435
ENSMUSG00000074519	-0.429395	0.204997	-2.09464	0.0362031	0.363957	Etohi1
ENSMUSG00000091173	1.41937	0.677473	2.09509	0.036163	0.363957	Gm7354
ENSMUSG00000087403	0.29363	0.14026	2.09348	0.0363066	0.364775	2900056M20Rik
ENSMUSG00000019789	-1.07404	0.513732	-2.09067	0.0365575	0.365398	Hey2
ENSMUSG00000027400	-0.820052	0.392154	-2.09115	0.0365146	0.365398	Pdyn
ENSMUSG00000028978	1.0921	0.522332	2.09082	0.036544	0.365398	Nos3
ENSMUSG00000038932	-0.535556	0.256167	-2.09065	0.0365594	0.365398	Tcfl5
ENSMUSG00000040473	0.450493	0.215487	2.09058	0.0365662	0.365398	A330021E22Rik
ENSMUSG00000042804	-0.332742	0.159045	-2.09212	0.0364276	0.365398	Gpr153
ENSMUSG00000075713	0.77276	0.369645	2.09055	0.0365687	0.365398
ENSMUSG00000078441	-0.296661	0.141813	-2.09192	0.0364456	0.365398	Scamp4
ENSMUSG00000083152	1.0074	0.481629	2.09165	0.0364702	0.365398	Apc-ps1
ENSMUSG00000084957	-0.385473	0.184437	-2.08999	0.0366183	0.365671	Bbip1
ENSMUSG00000068580	-0.279406	0.133815	-2.08801	0.0367973	0.367236	Zfyve19
ENSMUSG00000051506	1.11456	0.533861	2.08773	0.0368219	0.367258	Wdfy4
ENSMUSG00000014313	-0.414586	0.198609	-2.08745	0.0368474	0.36729	Cox6c
ENSMUSG00000014313	-0.414586	0.198609	-2.08745	0.0368474	0.36729	Cox6c
ENSMUSG00000036606	0.353724	0.169535	2.08643	0.0369393	0.367893	Plxnb2
ENSMUSG00000039623	0.459719	0.220353	2.08629	0.0369527	0.367893	C330006K01Rik
ENSMUSG00000039474	0.49853	0.238986	2.08602	0.0369767	0.367909	Wfs1
ENSMUSG00000005262	-0.282895	0.135739	-2.08411	0.0371504	0.368299	Ufd1l
ENSMUSG00000029169	-0.221116	0.106095	-2.08412	0.0371491	0.368299	Dhx15
ENSMUSG00000032531	0.479399	0.229972	2.0846	0.037106	0.368299	Amotl2
ENSMUSG00000057193	0.233767	0.112118	2.085	0.037069	0.368299	Slc44a2
ENSMUSG00000066443	-0.371433	0.178207	-2.08427	0.0371353	0.368299	Gm10163
ENSMUSG00000086308	0.818851	0.392879	2.08423	0.0371391	0.368299	G630016G05Rik
ENSMUSG00000036552	0.258504	0.124216	2.08109	0.037426	0.370585	2210404J11Rik
ENSMUSG00000078498	-1.00834	0.484472	-2.08132	0.0374042	0.370585	Gm13151
ENSMUSG00000000296	-0.573409	0.275608	-2.08052	0.0374775	0.370648	Tpd52l1
ENSMUSG00000042207	0.181037	0.0870096	2.08066	0.037465	0.370648	Kdm5b
ENSMUSG00000034932	-0.343984	0.165402	-2.07969	0.0375544	0.371186	Mrpl54
ENSMUSG00000041380	-0.601322	0.289224	-2.07909	0.0376094	0.371506	Htr2c
ENSMUSG00000022112	-0.416355	0.200369	-2.07795	0.0377144	0.372095	Gpc5
ENSMUSG00000073471	-0.307019	0.147742	-2.07807	0.0377026	0.372095	Rsph3a
ENSMUSG00000026558	-0.332161	0.159888	-2.07746	0.0377593	0.372315	Uck2
ENSMUSG00000038497	0.29188	0.140546	2.07676	0.037824	0.37273	Tmco3
ENSMUSG00000053025	0.372199	0.179254	2.07638	0.0378587	0.372848	Sv2b
ENSMUSG00000020642	0.272254	0.131157	2.07578	0.0379143	0.373172	Rnf144a
ENSMUSG00000001833	-0.472935	0.227964	-2.0746	0.0380234	0.373799	2007-09-01
ENSMUSG00000032526	-0.356582	0.171869	-2.07473	0.0380115	0.373799	Deb1
ENSMUSG00000028454	0.328465	0.158493	2.07242	0.0382261	0.375566	Pigo
ENSMUSG00000002688	-0.578196	0.279435	-2.06916	0.0385312	0.378112	Prkd1
ENSMUSG00000019132	-0.325226	0.157174	-2.0692	0.0385271	0.378112	BC005537
ENSMUSG00000034151	0.704834	0.34088	2.06769	0.0386693	0.37924	Zbbx
ENSMUSG00000021219	-0.499282	0.241522	-2.06723	0.0387123	0.379435	Rgs6
ENSMUSG00000027580	0.654642	0.316751	2.06674	0.0387589	0.379441	BC006779
ENSMUSG00000041781	-0.149824	0.0724927	-2.06674	0.0387582	0.379441	Cpsf2
ENSMUSG00000071107	0.944039	0.456846	2.06643	0.0387881	0.3795	4732465J04Rik
ENSMUSG00000083773	-0.301824	0.146096	-2.06593	0.0388353	0.379735	Gm13394
ENSMUSG00000006920	0.29205	0.141488	2.06413	0.0390052	0.380982	Ezh1
ENSMUSG00000063506	0.499149	0.241869	2.06372	0.0390443	0.380982	Arhgap22
ENSMUSG00000075782	0.759762	0.368086	2.06409	0.0390096	0.380982
ENSMUSG00000084922	-0.882248	0.427528	-2.0636	0.0390555	0.380982	9330179D12Rik
ENSMUSG00000017716	0.515268	0.249881	2.06205	0.0392027	0.381287	Birc5
ENSMUSG00000022429	1.01512	0.492233	2.06227	0.0391816	0.381287	Dmc1
ENSMUSG00000029378	-1.85251	0.898029	-2.06287	0.0391252	0.381287	Areg
ENSMUSG00000031917	-0.284201	0.137778	-2.06274	0.0391377	0.381287	Nip7
ENSMUSG00000032562	0.2425	0.117591	2.06224	0.0391845	0.381287	Gnai2
ENSMUSG00000041607	-0.280771	0.136203	-2.06141	0.0392638	0.381655	Mbp
ENSMUSG00000035873	-1.06584	0.517193	-2.06082	0.0393199	0.381974	Pawr
ENSMUSG00000019734	0.656895	0.31881	2.06046	0.0393544	0.382084	Tmc4
ENSMUSG00000055371	0.255514	0.124053	2.05971	0.039426	0.382554	Stam2
ENSMUSG00000031667	0.235657	0.114457	2.05892	0.0395018	0.383063	Aktip
ENSMUSG00000000301	-0.534175	0.259654	-2.05726	0.0396613	0.384382	Pemt
ENSMUSG00000074899	1.00165	0.487026	2.05668	0.0397174	0.384699	Spnb5
ENSMUSG00000086968	0.278396	0.135382	2.05637	0.0397465	0.384755	4933431E20Rik
ENSMUSG00000003657	-0.573138	0.278813	-2.05563	0.0398179	0.384947	Calb2
ENSMUSG00000038379	0.661056	0.321578	2.05566	0.0398151	0.384947	Ttk
ENSMUSG00000061461	-0.322158	0.156734	-2.05544	0.0398366	0.384947	1810013D10Rik
ENSMUSG00000038422	0.478456	0.23289	2.05442	0.0399347	0.385668	Hdhd3
ENSMUSG00000039801	0.325265	0.158345	2.05416	0.0399601	0.385687	2410089E03Rik
ENSMUSG00000014164	0.328036	0.159785	2.05298	0.0400747	0.386566	Klhl3
ENSMUSG00000027082	-0.84276	0.410604	-2.05249	0.0401221	0.386796	Tfpi
ENSMUSG00000018761	-0.296852	0.144715	-2.05129	0.0402392	0.387017	Mpdu1
ENSMUSG00000020133	-0.396312	0.193186	-2.05145	0.0402231	0.387017	2310011J03Rik
ENSMUSG00000068115	0.530646	0.258681	2.05135	0.0402324	0.387017	Ninl
ENSMUSG00000085098	1.19859	0.584248	2.0515	0.0402181	0.387017	Gm4221
ENSMUSG00000074582	0.19397	0.0946358	2.04965	0.0403986	0.388323	Arfgef2
ENSMUSG00000020420	0.46316	0.226081	2.04865	0.0404963	0.388807	Zfp607
ENSMUSG00000030519	-0.180926	0.0883057	-2.04886	0.0404756	0.388807	Apba2
ENSMUSG00000027200	-0.337769	0.164989	-2.04722	0.0406366	0.389927	Sema6d
ENSMUSG00000050840	-0.518277	0.253345	-2.04573	0.0407825	0.391098	Cdh20
ENSMUSG00000058498	0.704501	0.344441	2.04535	0.0408206	0.391235	Rnf207
ENSMUSG00000039958	1.00951	0.493858	2.04413	0.0409407	0.392158	4833442J19Rik
ENSMUSG00000075982	0.746861	0.36561	2.04278	0.0410743	0.393208
ENSMUSG00000006333	-0.308096	0.150883	-2.04196	0.0411555	0.393298	Rps9
ENSMUSG00000085062	-0.363455	0.17798	-2.04211	0.0411408	0.393298	4933404O12Rik
ENSMUSG00000090952	-0.702277	0.343872	-2.04226	0.0411256	0.393298	Gm17251
ENSMUSG00000028798	-0.292491	0.143324	-2.04077	0.0412736	0.394095	Eif3i
ENSMUSG00000035653	-0.255764	0.125335	-2.04064	0.0412868	0.394095	Lrfn5
ENSMUSG00000071234	-0.531465	0.260672	-2.03883	0.0414672	0.395587	Tmem90a
ENSMUSG00000024990	-0.644839	0.316376	-2.0382	0.0415296	0.395952	Rbp4
ENSMUSG00000020393	-0.589845	0.289635	-2.03651	0.0416989	0.397336	Kremen1
ENSMUSG00000017264	-0.268837	0.13204	-2.03602	0.0417478	0.397564	Exosc10
ENSMUSG00000046562	-0.331351	0.162763	-2.03579	0.0417712	0.397564	Unc119b
ENSMUSG00000054808	-0.320565	0.15757	-2.03443	0.0419087	0.398642	Actn4
ENSMUSG00000005951	0.504733	0.24817	2.03382	0.0419695	0.39899	Shpk
ENSMUSG00000021991	-0.409365	0.201378	-2.03282	0.0420708	0.399516	Cacna2d3
ENSMUSG00000037278	-0.456956	0.224792	-2.03279	0.0420735	0.399516	Tmem97
ENSMUSG00000032777	0.358781	0.176526	2.03245	0.0421078	0.399611	Gtf3c1
ENSMUSG00000078306	1.17301	0.577277	2.03197	0.0421568	0.399845	Gm16493
ENSMUSG00000026944	0.286379	0.141017	2.03081	0.0422738	0.400724	Abca2
ENSMUSG00000019865	-1.35571	0.667868	-2.02991	0.0423657	0.401296	Nmbr
ENSMUSG00000030417	-0.367327	0.180972	-2.02974	0.0423831	0.401296	Pdcd5
ENSMUSG00000030417	-0.367327	0.180972	-2.02974	0.0423831	0.401296	Pdcd5
ENSMUSG00000048039	-0.184084	0.0907623	-2.0282	0.0425396	0.402547	Isg20l2
ENSMUSG00000027189	-0.232954	0.114936	-2.02682	0.0426806	0.403649	Trim44
ENSMUSG00000006276	0.267387	0.132013	2.02546	0.0428203	0.404504	Eps15l1
ENSMUSG00000025202	0.511588	0.252606	2.02524	0.0428431	0.404504	Scd3
ENSMUSG00000092592	0.826433	0.408071	2.02522	0.0428449	0.404504	Gm20449
ENSMUSG00000066362	-0.389854	0.192607	-2.02409	0.0429611	0.405369	Rps13-ps1
ENSMUSG00000066362	-0.389854	0.192607	-2.02409	0.0429611	0.405369	Rps13-ps1
ENSMUSG00000066362	-0.389854	0.192607	-2.02409	0.0429611	0.405369	Rps13-ps1
ENSMUSG00000050144	0.277608	0.137182	2.02365	0.043006	0.405559	Slc25a44
ENSMUSG00000051359	-0.279053	0.137955	-2.02278	0.043096	0.406175	Ncald
ENSMUSG00000026546	0.89112	0.440725	2.02194	0.0431823	0.406703	Ccdc19
ENSMUSG00000074178	0.818454	0.404823	2.02176	0.0432016	0.406703	Gm10638
ENSMUSG00000027208	0.940705	0.465518	2.02077	0.0433036	0.407374	Fgf7
ENSMUSG00000034584	1.12338	0.556229	2.01963	0.0434215	0.407374	Exph5
ENSMUSG00000042918	0.863987	0.427722	2.01997	0.043386	0.407374	Mamstr
ENSMUSG00000047434	0.320477	0.158677	2.01968	0.0434165	0.407374	AI480653
ENSMUSG00000048960	-0.425354	0.210535	-2.02035	0.0433475	0.407374	Prex2
ENSMUSG00000069020	-0.295596	0.1463	-2.02047	0.0433342	0.407374	Urm1
ENSMUSG00000038400	-0.463107	0.229355	-2.01917	0.0434699	0.407596	Pmepa1
ENSMUSG00000032741	0.431224	0.213654	2.01832	0.0435576	0.407952	Tpcn1
ENSMUSG00000074006	1.16791	0.578652	2.01833	0.0435569	0.407952	Omp
ENSMUSG00000091079	1.19717	0.593378	2.01755	0.0436381	0.408473	Gm17105
ENSMUSG00000031299	-0.194288	0.0963921	-2.0156	0.0438422	0.410151	Pdha1
ENSMUSG00000042680	-0.324898	0.161225	-2.01518	0.0438857	0.410324	Fam59a
ENSMUSG00000006412	-0.264385	0.131306	-2.01351	0.0440612	0.410408	Pfdn2
ENSMUSG00000020486	0.40735	0.202247	2.01412	0.043997	0.410408	2004-09-01
ENSMUSG00000024500	-0.238643	0.118516	-2.0136	0.0440515	0.410408	Ppp2r2b
ENSMUSG00000030180	0.275565	0.13683	2.01392	0.0440179	0.410408	Kdm5a
ENSMUSG00000033031	-0.530073	0.263206	-2.01391	0.0440193	0.410408	C330027C09Rik
ENSMUSG00000038736	-0.389226	0.193286	-2.01373	0.0440376	0.410408	Nudcd1
ENSMUSG00000040269	-0.467728	0.232304	-2.01343	0.0440695	0.410408	Mrps28
ENSMUSG00000014426	0.327485	0.162775	2.01188	0.0442322	0.41169	Map3k4
ENSMUSG00000044646	0.438662	0.218133	2.01098	0.0443274	0.412342	Zbtb7c
ENSMUSG00000026610	-0.512433	0.254892	-2.01039	0.0443895	0.412642	Esrrg
ENSMUSG00000056966	1.06793	0.531318	2.00996	0.0444349	0.412642	Gjc3
ENSMUSG00000072568	-0.561939	0.27955	-2.01015	0.0444148	0.412642	Fam84b
ENSMUSG00000040929	-0.560532	0.278956	-2.00939	0.0444959	0.412742	Rfx3
ENSMUSG00000055067	0.210511	0.104763	2.0094	0.0444946	0.412742	Smyd3
ENSMUSG00000030340	0.994133	0.495122	2.00785	0.0446587	0.414019	Scnn1a
ENSMUSG00000003438	-0.261245	0.130163	-2.00706	0.0447435	0.414148	Timm50
ENSMUSG00000028187	-0.441918	0.220186	-2.00702	0.044747	0.414148	Rpf1
ENSMUSG00000053565	-0.291662	0.145321	-2.00701	0.0447482	0.414148	Eif3k
ENSMUSG00000021033	-0.352618	0.17577	-2.00613	0.0448424	0.414553	Gstz1
ENSMUSG00000062372	0.598518	0.29831	2.00636	0.0448175	0.414553	Otof
ENSMUSG00000038507	0.440038	0.219423	2.00544	0.0449165	0.414896	Parp12
ENSMUSG00000081378	-0.375444	0.187225	-2.00531	0.04493	0.414896	Gm6834
ENSMUSG00000040265	0.442224	0.220619	2.00447	0.04502	0.415437	Dnm3
ENSMUSG00000040767	0.384873	0.192025	2.00429	0.0450392	0.415437	Snrnp25
ENSMUSG00000029817	-0.299635	0.149543	-2.00367	0.0451055	0.415816	Tra2a
ENSMUSG00000053768	-0.253767	0.126699	-2.00291	0.0451872	0.416335	Chchd3
ENSMUSG00000006356	-0.241624	0.12083	-1.99971	0.0455317	0.41766	Crip2
ENSMUSG00000020044	-0.892724	0.44628	-2.00037	0.0454604	0.41766	Timp3
ENSMUSG00000022174	-0.404667	0.202229	-2.00103	0.0453889	0.41766	Dad1
ENSMUSG00000025290	-0.288132	0.144089	-1.99968	0.0455343	0.41766	Rps24
ENSMUSG00000025290	-0.288132	0.144089	-1.99968	0.0455343	0.41766	Rps24
ENSMUSG00000034825	-0.398288	0.199154	-1.9999	0.0455108	0.41766	Nrip3
ENSMUSG00000040350	0.493097	0.246571	1.99982	0.0455202	0.41766	Trim7
ENSMUSG00000071104	-0.738671	0.369216	-2.00065	0.0454304	0.41766	Ccdc110
ENSMUSG00000075756	0.556077	0.277884	2.00112	0.0453799	0.41766
ENSMUSG00000081593	0.676876	0.33855	1.99934	0.0455719	0.417772	Gm11841
ENSMUSG00000063273	-0.209667	0.104888	-1.99897	0.0456118	0.417905	Naa15
ENSMUSG00000020537	-0.219118	0.109704	-1.99736	0.0457859	0.418416	Drg2
ENSMUSG00000025268	0.231897	0.116081	1.99772	0.045747	0.418416	Maged2
ENSMUSG00000041797	0.451977	0.226348	1.99683	0.0458438	0.418416	Abca9
ENSMUSG00000053411	0.461456	0.23108	1.99696	0.04583	0.418416	Cbx7
ENSMUSG00000059602	0.354569	0.177445	1.99819	0.045696	0.418416	Syn3
ENSMUSG00000071567	-0.316763	0.158634	-1.99681	0.0458457	0.418416	A830039N20Rik
ENSMUSG00000078486	1.20605	0.603679	1.99783	0.0457353	0.418416	2310042D19Rik
ENSMUSG00000054455	-0.170937	0.0856402	-1.99599	0.0459349	0.418997	Vapb
ENSMUSG00000029819	-1.15608	0.579468	-1.99507	0.046035	0.419677	Npy
ENSMUSG00000022995	-0.31355	0.157231	-1.9942	0.0461306	0.419905	Enah
ENSMUSG00000026918	0.181382	0.0909759	1.99374	0.0461803	0.419905	Brd3
ENSMUSG00000028495	-0.228555	0.114643	-1.99361	0.0461946	0.419905	Rps6
ENSMUSG00000028495	-0.228555	0.114643	-1.99361	0.0461946	0.419905	Rps6
ENSMUSG00000033377	-1.03673	0.519874	-1.99419	0.0461309	0.419905	Palmd
ENSMUSG00000057113	-0.322286	0.16162	-1.9941	0.0461414	0.419905	Npm1
ENSMUSG00000057113	-0.322286	0.16162	-1.9941	0.0461414	0.419905	Npm1
ENSMUSG00000073423	-0.268352	0.134617	-1.99344	0.0462133	0.419905	Zfp414
ENSMUSG00000030189	-0.424781	0.21317	-1.99268	0.0462964	0.420195	Csda
ENSMUSG00000043795	0.990914	0.497236	1.99285	0.0462782	0.420195	Gm14492
ENSMUSG00000017781	-0.208344	0.104621	-1.99141	0.0464361	0.420303	Pitpna
ENSMUSG00000018427	-0.555032	0.278651	-1.99185	0.0463873	0.420303	Ypel2
ENSMUSG00000031812	0.228793	0.11489	1.99141	0.0464356	0.420303	Map1lc3b
ENSMUSG00000064181	-0.219177	0.110047	-1.99167	0.0464078	0.420303	Rab3ip
ENSMUSG00000089951	-0.423918	0.212805	-1.99205	0.0463652	0.420303	Gm14435
ENSMUSG00000089951	-0.423918	0.212805	-1.99205	0.0463652	0.420303	Gm14435
ENSMUSG00000089951	-0.423918	0.212805	-1.99205	0.0463652	0.420303	Gm14435
ENSMUSG00000077440	-0.76199	0.383056	-1.98924	0.0466745	0.422228
ENSMUSG00000082806	1.24129	0.624077	1.989	0.0467013	0.422238	Rpl13-ps1
ENSMUSG00000048234	0.427358	0.214975	1.98794	0.0468179	0.42306	Rnf149
ENSMUSG00000048794	0.548348	0.275935	1.98724	0.0468959	0.423532	Ccdc37
ENSMUSG00000014301	-0.221909	0.111707	-1.98652	0.0469757	0.42402	Pam16
ENSMUSG00000031012	-0.28267	0.142385	-1.98525	0.0471167	0.425059	Cask
ENSMUSG00000030319	0.37911	0.191015	1.98471	0.0471767	0.425226	Cand2
ENSMUSG00000032965	-0.311136	0.156811	-1.98415	0.0472387	0.425226	Ift57
ENSMUSG00000041341	0.229137	0.115474	1.98431	0.047221	0.425226	Atg2b
ENSMUSG00000075467	-0.315129	0.158822	-1.98416	0.0472377	0.425226	Dnlz
ENSMUSG00000027804	-0.275043	0.138677	-1.98334	0.0473299	0.425581	Ppid
ENSMUSG00000038347	0.394336	0.198819	1.98339	0.0473235	0.425581	Tcte2
ENSMUSG00000038347	0.394336	0.198819	1.98339	0.0473235	0.425581	2700054A10Rik
ENSMUSG00000087385	0.301647	0.152183	1.98213	0.0474645	0.426558	AA415398
ENSMUSG00000016763	-0.328091	0.165647	-1.98067	0.0476288	0.427318	Scube1
ENSMUSG00000019828	0.364584	0.184092	1.98045	0.0476531	0.427318	Grm1
ENSMUSG00000030401	-0.247476	0.124948	-1.98064	0.0476321	0.427318	Rtn2
ENSMUSG00000044968	0.709726	0.358289	1.98087	0.0476055	0.427318	Napepld
ENSMUSG00000029761	0.412129	0.208249	1.97902	0.0478138	0.427964	Cald1
ENSMUSG00000051401	-0.574987	0.290488	-1.97938	0.047773	0.427964	Kctd16
ENSMUSG00000064682	-0.889732	0.449654	-1.97871	0.0478492	0.427964
ENSMUSG00000082626	-0.380341	0.192183	-1.97906	0.0478094	0.427964	Gm12270
ENSMUSG00000093452	0.542205	0.274028	1.97865	0.0478553	0.427964
ENSMUSG00000075800	1.1137	0.563664	1.97583	0.0481743	0.430582
ENSMUSG00000087050	0.721926	0.365646	1.97438	0.0483382	0.431813	A030003K02Rik
ENSMUSG00000080741	0.952931	0.48271	1.97413	0.0483675	0.43184	Gm11398
ENSMUSG00000022744	-0.337683	0.171081	-1.97382	0.0484019	0.431912	Cldn25
ENSMUSG00000030525	-0.428604	0.217186	-1.97345	0.0484449	0.432061	Chrna7
ENSMUSG00000018428	0.247182	0.125392	1.97127	0.0486926	0.433993	Akap1
[truncated: 29,365 more rows]

## Sheet: BDNF 120
Supplementary Data 5.
RNAseq RAD21-TEV 4OHT vs EtOH, BDNF 30 min and 120 min
ensembl_id	log2FoldChange	lfcSE	stat	pvalue	padj	mgi_symbol
ENSMUSG00000044071	-1.93089	0.136265	-14.1701	1.40366e-45	2.46861e-41	Fam19a2
ENSMUSG00000013846	-2.84695	0.212904	-13.372	8.81345e-41	7.75011e-37	St3gal1
ENSMUSG00000005198	1.45589	0.123112	11.8257	2.87394e-32	1.6848e-28	Polr2a
ENSMUSG00000067028	-2.38084	0.2329	-10.2226	1.57143e-24	6.90916e-21	Cntnap5b
ENSMUSG00000046387	-1.4422	0.14256	-10.1164	4.67056e-24	1.64282e-20	Pcdhb17
ENSMUSG00000047910	-1.66987	0.170209	-9.8107	1.01259e-22	2.96808e-19	Pcdhb16
ENSMUSG00000021614	-2.55643	0.265485	-9.62926	6.01624e-22	1.51154e-18	Vcan
ENSMUSG00000019970	-2.15513	0.228197	-9.44416	3.58262e-21	7.00083e-18	Sgk1
ENSMUSG00000024211	-2.82344	0.29883	-9.44829	3.44415e-21	7.00083e-18	Grm8
ENSMUSG00000032537	-1.61569	0.173631	-9.30534	1.3356e-20	2.34892e-17	Ephb1
ENSMUSG00000034320	1.24587	0.134819	9.24102	2.4416e-20	3.61339e-17	Slc26a2
ENSMUSG00000091969	-1.15974	0.125513	-9.23998	2.46549e-20	3.61339e-17	Pcdha3
ENSMUSG00000046191	-1.31721	0.143053	-9.20786	3.32706e-20	4.50099e-17	Pcdhb20
ENSMUSG00000043313	-1.60646	0.175849	-9.13547	6.51236e-20	8.18091e-17	Pcdhb19
ENSMUSG00000044022	-1.58728	0.179431	-8.8462	9.05523e-19	1.0617e-15	Pcdhb21
ENSMUSG00000025790	-1.40364	0.160835	-8.72724	2.60958e-18	2.86842e-15	Slco3a1
ENSMUSG00000043067	-1.0971	0.128157	-8.56057	1.12314e-17	1.16192e-14	Dpy19l1
ENSMUSG00000039989	1.03955	0.1226	8.47925	2.26657e-17	2.21457e-14	Cbx4
ENSMUSG00000052581	-2.0955	0.249011	-8.41531	3.91841e-17	3.627e-14	Lrrtm4
ENSMUSG00000048706	1.61135	0.191884	8.39754	4.55938e-17	4.00929e-14	D4Bwg0951e
ENSMUSG00000019889	-1.76084	0.21018	-8.3778	5.39245e-17	4.36264e-14	Ptprk
ENSMUSG00000075232	0.928488	0.110846	8.3764	5.45734e-17	4.36264e-14	Amd1
ENSMUSG00000047033	-1.61301	0.194369	-8.29867	1.05283e-16	8.05049e-14	Pcdhb15
ENSMUSG00000058152	-1.63224	0.19682	-8.29307	1.10359e-16	8.08702e-14	Chsy3
ENSMUSG00000070695	-1.0641	0.129909	-8.19112	2.58803e-16	1.82063e-13	Cntnap5a
ENSMUSG00000045994	-1.00446	0.122938	-8.17043	3.07287e-16	2.07856e-13	B3gat1
ENSMUSG00000028222	-2.52861	0.309674	-8.16539	3.20394e-16	2.08695e-13	Calb1
ENSMUSG00000030518	-1.57585	0.193555	-8.14162	3.90016e-16	2.36524e-13	Fam189a1
ENSMUSG00000057604	1.72263	0.211573	8.142	3.88809e-16	2.36524e-13	Lmcd1
ENSMUSG00000073591	-1.58711	0.195116	-8.13422	4.14582e-16	2.43042e-13	Pcdhb22
ENSMUSG00000060096	0.892999	0.110336	8.09344	5.80022e-16	3.29059e-13	Amd-ps3
ENSMUSG00000048347	-1.52178	0.188184	-8.08665	6.13275e-16	3.37052e-13	Pcdhb18
ENSMUSG00000027358	-3.02209	0.374726	-8.06481	7.33527e-16	3.90925e-13	Bmp2
ENSMUSG00000024647	-1.24183	0.154422	-8.04175	8.85657e-16	4.58119e-13	Cbln2
ENSMUSG00000039683	-1.51674	0.192885	-7.86343	3.73744e-15	1.87801e-12	Sdk1
ENSMUSG00000005148	-2.48316	0.315993	-7.85827	3.89468e-15	1.90266e-12	Klf5
ENSMUSG00000003746	-1.6417	0.212292	-7.73322	1.04863e-14	4.98439e-12	Man1a
ENSMUSG00000039959	-0.747989	0.0968809	-7.72071	1.15681e-14	5.35388e-12	Hip1
ENSMUSG00000061353	-3.12572	0.405202	-7.71397	1.21961e-14	5.49982e-12	Cxcl12
ENSMUSG00000063953	0.951205	0.123548	7.69908	1.37045e-14	6.02554e-12	Amd2
ENSMUSG00000027347	-1.59144	0.208562	-7.63056	2.3374e-14	1.00263e-11	Rasgrp1
ENSMUSG00000043531	-1.45676	0.191031	-7.62576	2.42609e-14	1.0159e-11	Sorcs1
ENSMUSG00000026259	-1.18429	0.156524	-7.5662	3.8429e-14	1.57175e-11	Ngef
ENSMUSG00000047842	-1.35168	0.180103	-7.50503	6.14151e-14	2.45479e-11	Diras2
ENSMUSG00000074622	1.63778	0.219218	7.47102	7.95727e-14	3.10988e-11	Mafb
ENSMUSG00000053199	-1.66443	0.222989	-7.46418	8.38223e-14	3.20474e-11	Arhgap20
ENSMUSG00000022206	-1.77224	0.238721	-7.42392	1.137e-13	4.25457e-11	Npr3
ENSMUSG00000021676	-1.87108	0.255707	-7.31729	2.5302e-13	9.27056e-11	Iqgap2
ENSMUSG00000091002	-1.47771	0.204856	-7.21344	5.45573e-13	1.95816e-10	Tcerg1l
ENSMUSG00000053465	-1.76438	0.245747	-7.17965	6.98903e-13	2.45832e-10	Hs6st3
ENSMUSG00000027674	-1.7093	0.238343	-7.1716	7.41288e-13	2.55628e-10	Pex5l
ENSMUSG00000029093	-1.44218	0.203541	-7.08547	1.38571e-12	4.59819e-10	Sorcs2
ENSMUSG00000059003	-1.42143	0.200544	-7.08784	1.36223e-12	4.59819e-10	Grin2a
ENSMUSG00000054204	-3.62144	0.513037	-7.05882	1.67924e-12	5.46903e-10	Fam150b
ENSMUSG00000055254	-0.816167	0.115856	-7.04468	1.85888e-12	5.94401e-10	Ntrk2
ENSMUSG00000038349	-1.13094	0.160753	-7.03525	1.9891e-12	6.24684e-10	Plcl1
ENSMUSG00000036782	-0.944646	0.134946	-7.00016	2.55675e-12	7.8887e-10	Klhl13
ENSMUSG00000047307	-1.39192	0.200666	-6.93647	4.02016e-12	1.21901e-09	Pcdhb13
ENSMUSG00000021721	-2.6115	0.377545	-6.91705	4.61153e-12	1.37463e-09	Htr1a
ENSMUSG00000051242	-0.868162	0.126652	-6.85471	7.14594e-12	2.09459e-09	Pcdhb9
ENSMUSG00000045216	-0.758263	0.110922	-6.83603	8.1419e-12	2.3474e-09	Hs6st1
ENSMUSG00000066687	-1.51736	0.222354	-6.82405	8.85076e-12	2.51062e-09	Zbtb16
ENSMUSG00000045062	-0.862642	0.126587	-6.81459	9.453e-12	2.63889e-09	Pcdhb7
ENSMUSG00000044043	-1.47083	0.216487	-6.79408	1.09008e-11	2.9955e-09	Pcdhb14
ENSMUSG00000023800	-0.796114	0.117606	-6.7693	1.29407e-11	3.50136e-09	Tiam2
ENSMUSG00000030657	-1.16573	0.174758	-6.67052	2.54901e-11	6.79233e-09	Xylt1
ENSMUSG00000048107	-0.862293	0.129927	-6.63677	3.20625e-11	8.41616e-09	Kctd12
ENSMUSG00000039910	-1.53561	0.231702	-6.62752	3.41377e-11	8.82912e-09	Cited2
ENSMUSG00000036902	-1.23313	0.186963	-6.5956	4.23552e-11	1.07957e-08	Neto2
ENSMUSG00000039488	-1.12477	0.170615	-6.59248	4.32552e-11	1.08676e-08	Cntn5
ENSMUSG00000051486	-0.823628	0.12504	-6.58692	4.49046e-11	1.11231e-08	Pcdhb11
ENSMUSG00000038280	0.616476	0.0945346	6.52117	6.97621e-11	1.70404e-08	Ostm1
ENSMUSG00000028019	-1.80684	0.277357	-6.5145	7.29326e-11	1.75708e-08	Pdgfc
ENSMUSG00000030930	-1.46738	0.225686	-6.5019	7.93131e-11	1.88497e-08	Chst15
ENSMUSG00000039579	-1.72016	0.265977	-6.46734	9.97423e-11	2.33889e-08	Grin3a
ENSMUSG00000019647	-1.77586	0.274874	-6.46063	1.04265e-10	2.41278e-08	Sema6a
ENSMUSG00000043458	-1.13747	0.17659	-6.44129	1.18463e-10	2.70572e-08	Pcdhb12
ENSMUSG00000022231	-1.49636	0.233224	-6.41598	1.39916e-10	3.15475e-08	Sema5a
ENSMUSG00000016150	-1.08695	0.169713	-6.40462	1.50741e-10	3.3558e-08	Odz1
ENSMUSG00000054477	-2.05915	0.321826	-6.39833	1.57085e-10	3.45332e-08	Kcnn2
ENSMUSG00000046699	-1.37287	0.214847	-6.39001	1.65879e-10	3.55771e-08	Slitrk4
ENSMUSG00000060487	-1.4217	0.222449	-6.39111	1.64689e-10	3.55771e-08	Samd5
ENSMUSG00000021730	-1.35462	0.212476	-6.37538	1.82513e-10	3.86729e-08	Hcn1
ENSMUSG00000028519	-0.973729	0.152982	-6.36498	1.95312e-10	4.08922e-08	Dab1
ENSMUSG00000045498	-1.21687	0.191978	-6.33856	2.31928e-10	4.79873e-08	Pcdhb3
ENSMUSG00000055026	-1.4433	0.228606	-6.31347	2.72853e-10	5.57984e-08	Gabrg3
ENSMUSG00000001986	-0.938795	0.148781	-6.30993	2.79162e-10	5.64324e-08	Gria3
ENSMUSG00000048878	0.897463	0.142928	6.27914	3.40449e-10	6.80396e-08	Hexim1
ENSMUSG00000046463	2.0387	0.32608	6.25214	4.04874e-10	8.00059e-08	5930403N24Rik
ENSMUSG00000025089	-2.23918	0.358822	-6.24036	4.3657e-10	8.53105e-08	Gfra1
ENSMUSG00000032502	-1.41388	0.227172	-6.22382	4.85196e-10	9.37707e-08	Stac
ENSMUSG00000060534	-1.08362	0.17417	-6.22164	4.91978e-10	9.40481e-08	Dcc
ENSMUSG00000050394	0.665704	0.108055	6.1608	7.2378e-10	1.36872e-07	Armcx6
ENSMUSG00000045083	-0.880128	0.143067	-6.15185	7.65836e-10	1.43285e-07	Lingo2
ENSMUSG00000028804	-0.936884	0.152417	-6.14687	7.9029e-10	1.46303e-07	Csmd2
ENSMUSG00000034997	-3.19361	0.522859	-6.10798	1.00903e-09	1.84852e-07	Htr2a
ENSMUSG00000041708	-0.88728	0.145641	-6.09225	1.11333e-09	2.01858e-07	Mpped1
ENSMUSG00000036510	-1.08831	0.178713	-6.08972	1.13111e-09	2.02989e-07	Cdh8
ENSMUSG00000063434	-1.52087	0.250032	-6.08272	1.18164e-09	2.09914e-07	Sorcs3
ENSMUSG00000025946	-2.8274	0.467058	-6.05364	1.41611e-09	2.46957e-07	Pth2r
ENSMUSG00000073565	-2.52307	0.416802	-6.0534	1.41825e-09	2.46957e-07	Prr16
ENSMUSG00000024431	-1.3841	0.229204	-6.03874	1.55321e-09	2.65206e-07	Nr3c1
ENSMUSG00000035357	-2.00035	0.331225	-6.03926	1.54818e-09	2.65206e-07	Pdzrn3
ENSMUSG00000046159	-1.27013	0.21045	-6.0353	1.58664e-09	2.6831e-07	Chrm3
ENSMUSG00000038910	-0.497977	0.082717	-6.02025	1.74143e-09	2.91682e-07	Plcl2
ENSMUSG00000020905	-1.19223	0.198201	-6.01528	1.79574e-09	2.97941e-07	Usp43
ENSMUSG00000052539	-0.637406	0.10627	-5.99799	1.99771e-09	3.28353e-07	Magi3
ENSMUSG00000032452	-1.00796	0.168313	-5.98861	2.11637e-09	3.44635e-07	Clstn2
ENSMUSG00000058248	-1.32744	0.223166	-5.9482	2.71099e-09	4.37414e-07	Kcnh1
ENSMUSG00000025578	0.996866	0.167714	5.94384	2.78414e-09	4.45052e-07	Cbx8
ENSMUSG00000026107	1.07152	0.180318	5.94239	2.80894e-09	4.45052e-07	Obfc2a
ENSMUSG00000045876	-0.87963	0.148507	-5.92314	3.15858e-09	4.95981e-07	Pcdhb8
ENSMUSG00000028086	-0.700434	0.118414	-5.91511	3.31654e-09	5.11649e-07	Fbxw7
ENSMUSG00000030075	-1.25281	0.21177	-5.91591	3.30047e-09	5.11649e-07	Cntn3
ENSMUSG00000034402	-1.84814	0.31267	-5.91085	3.40355e-09	5.17493e-07	Kcnh5
ENSMUSG00000060961	-1.69925	0.287503	-5.91038	3.41327e-09	5.17493e-07	Slc4a4
ENSMUSG00000063687	-0.735036	0.124882	-5.88584	3.96045e-09	5.95319e-07	Pcdhb5
ENSMUSG00000024544	-0.845429	0.143815	-5.8786	4.13761e-09	6.1668e-07	D18Ertd653e
ENSMUSG00000052353	-1.16859	0.199443	-5.8593	4.64828e-09	6.86969e-07	9930013L23Rik
ENSMUSG00000029821	0.693584	0.118475	5.85424	4.79201e-09	7.0231e-07	Dfna5
ENSMUSG00000035934	-1.49266	0.255452	-5.84323	5.11988e-09	7.4416e-07	Pknox2
ENSMUSG00000021379	1.20787	0.208344	5.79748	6.73194e-09	9.70447e-07	Id4
ENSMUSG00000032503	-0.764286	0.132037	-5.78845	7.10405e-09	1.01576e-06	Arpp21
ENSMUSG00000023927	-1.06438	0.184217	-5.77786	7.56545e-09	1.07301e-06	Satb1
ENSMUSG00000074505	-1.78783	0.309873	-5.76956	7.94769e-09	1.11821e-06	Fat3
ENSMUSG00000036158	-0.995504	0.172951	-5.75597	8.61433e-09	1.20238e-06	Prickle1
ENSMUSG00000030844	-1.34089	0.233695	-5.73778	9.59255e-09	1.318e-06	Rgs10
ENSMUSG00000063415	-1.93629	0.337459	-5.73786	9.58795e-09	1.318e-06	Cyp26b1
ENSMUSG00000019899	1.02153	0.178179	5.73317	9.85697e-09	1.34383e-06	Lama2
ENSMUSG00000027748	-1.57475	0.275034	-5.72566	1.0303e-08	1.39383e-06	Trpc4
ENSMUSG00000024109	-0.452616	0.0792061	-5.71441	1.10085e-08	1.47792e-06	Nrxn1
ENSMUSG00000022514	-1.91411	0.335397	-5.70699	1.14988e-08	1.53205e-06	Il1rap
ENSMUSG00000051599	-0.953812	0.167717	-5.68704	1.29264e-08	1.70929e-06	Pcdhb2
ENSMUSG00000050936	0.83785	0.147388	5.68467	1.31068e-08	1.72021e-06	Hist2h2bb
ENSMUSG00000059857	-1.43408	0.253605	-5.65479	1.56034e-08	2.03272e-06	Ntng1
ENSMUSG00000020704	-1.29902	0.229815	-5.65245	1.58173e-08	2.04543e-06	Accn1
ENSMUSG00000031673	-0.783301	0.138865	-5.64075	1.69315e-08	2.17354e-06	Cdh11
ENSMUSG00000028101	0.641795	0.113875	5.63594	1.74108e-08	2.21887e-06	Pias3
ENSMUSG00000022262	0.812132	0.1453	5.58935	2.27916e-08	2.86312e-06	Dnahc5
ENSMUSG00000040125	-1.00349	0.179527	-5.58962	2.27569e-08	2.86312e-06	Gpr26
ENSMUSG00000036356	-0.868572	0.155888	-5.57176	2.52174e-08	3.14538e-06	Csgalnact1
ENSMUSG00000004151	-1.25463	0.225248	-5.57001	2.54724e-08	3.14907e-06	Etv1
ENSMUSG00000019978	-0.784637	0.140922	-5.56789	2.57842e-08	3.14907e-06	Epb4.1l2
ENSMUSG00000036760	-2.23727	0.40174	-5.56896	2.56264e-08	3.14907e-06	Kcnk9
ENSMUSG00000059974	-0.659741	0.118618	-5.56191	2.66833e-08	3.23641e-06	Ntm
ENSMUSG00000091299	-0.937042	0.168537	-5.55985	2.70009e-08	3.2525e-06	Snhg7
ENSMUSG00000026640	-0.689881	0.124497	-5.54136	3.00131e-08	3.59075e-06	Plxna2
ENSMUSG00000021294	-1.49568	0.270287	-5.53367	3.13605e-08	3.7266e-06	Kif26a
ENSMUSG00000028064	0.675916	0.122305	5.5265	3.26688e-08	3.85601e-06	Sema4a
ENSMUSG00000072720	0.931301	0.168721	5.51977	3.39451e-08	3.97994e-06	Myo18b
ENSMUSG00000041729	0.469467	0.0851272	5.51488	3.49012e-08	4.02458e-06	Coro2b
ENSMUSG00000055409	-1.59368	0.289068	-5.51318	3.52411e-08	4.02458e-06	Nell1
ENSMUSG00000059921	-0.942431	0.170897	-5.51463	3.49513e-08	4.02458e-06	Unc5c
ENSMUSG00000070509	-1.28798	0.233616	-5.51322	3.52334e-08	4.02458e-06	Rgma
ENSMUSG00000020867	-2.76242	0.502316	-5.49936	3.81162e-08	4.3211e-06	Spata20
ENSMUSG00000022636	-1.34949	0.245434	-5.49838	3.8329e-08	4.3211e-06	Alcam
ENSMUSG00000041592	-1.21889	0.222101	-5.48799	4.06533e-08	4.55395e-06	Sdk2
ENSMUSG00000028909	-0.981074	0.179198	-5.47481	4.37991e-08	4.87528e-06	Ptpru
ENSMUSG00000037573	0.81633	0.149359	5.46554	4.61497e-08	5.10462e-06	Tob1
ENSMUSG00000019850	-1.80308	0.331488	-5.43934	5.3477e-08	5.87813e-06	Tnfaip3
ENSMUSG00000005958	-1.27106	0.234992	-5.40894	6.33975e-08	6.92529e-06	Ephb3
ENSMUSG00000051920	-1.46227	0.270674	-5.40233	6.57817e-08	7.14137e-06	Rspo2
ENSMUSG00000026058	-1.10075	0.204293	-5.38808	7.1215e-08	7.68379e-06	Khdrbs2
ENSMUSG00000039089	-1.03611	0.192489	-5.3827	7.33758e-08	7.86865e-06	L3mbtl3
ENSMUSG00000033377	-2.66972	0.498485	-5.35567	8.52383e-08	9.08537e-06	Palmd
ENSMUSG00000045404	-1.87686	0.353095	-5.31545	1.06397e-07	1.12723e-05	Kcnk13
ENSMUSG00000022454	-0.478663	0.090424	-5.29354	1.19968e-07	1.2634e-05	Nell2
ENSMUSG00000063626	-0.839568	0.159543	-5.26235	1.42227e-07	1.48889e-05	Unc5d
ENSMUSG00000044636	0.492483	0.0937069	5.25557	1.47567e-07	1.53566e-05	Csrnp2
ENSMUSG00000022332	-1.04774	0.199581	-5.24967	1.52373e-07	1.57091e-05	Khdrbs3
ENSMUSG00000028033	-0.891869	0.169905	-5.24922	1.52741e-07	1.57091e-05	Kcnq5
ENSMUSG00000045689	-1.23435	0.235794	-5.23489	1.65085e-07	1.688e-05	Pcdhb4
ENSMUSG00000006930	1.24166	0.237541	5.22714	1.72154e-07	1.74462e-05	Hap1
ENSMUSG00000031838	0.734023	0.140439	5.22665	1.72607e-07	1.74462e-05	Ifi30
ENSMUSG00000036192	-1.11546	0.213719	-5.21927	1.79634e-07	1.80528e-05	Rorb
ENSMUSG00000023192	-0.74738	0.14328	-5.21621	1.82625e-07	1.8249e-05	Grm2
ENSMUSG00000002688	-1.3779	0.265441	-5.191	2.09162e-07	2.07827e-05	Prkd1
ENSMUSG00000024558	-0.853496	0.164563	-5.18644	2.14357e-07	2.11792e-05	Mapk4
ENSMUSG00000048787	0.704597	0.135958	5.18246	2.18973e-07	2.15144e-05	Dcun1d3
ENSMUSG00000021224	-1.1746	0.226752	-5.1801	2.21766e-07	2.16678e-05	Numb
ENSMUSG00000041046	-1.71378	0.331274	-5.1733	2.3e-07	2.23481e-05	Ramp3
ENSMUSG00000026312	-0.926107	0.179159	-5.16919	2.35116e-07	2.27197e-05	Cdh7
ENSMUSG00000032265	-2.47111	0.478877	-5.16023	2.46653e-07	2.37043e-05	Fam46a
ENSMUSG00000055540	-1.07819	0.209288	-5.15172	2.58109e-07	2.46705e-05	Epha6
ENSMUSG00000053846	-1.36058	0.264233	-5.14917	2.61635e-07	2.48723e-05	Lipg
ENSMUSG00000007440	-0.347996	0.0677158	-5.13907	2.76104e-07	2.61067e-05	Pcdha9
ENSMUSG00000007440	-0.347996	0.0677158	-5.13907	2.76104e-07	2.61067e-05	Pcdha5
ENSMUSG00000007440	-0.347996	0.0677158	-5.13907	2.76104e-07	2.61067e-05	Pcdha4
ENSMUSG00000007440	-0.347996	0.0677158	-5.13907	2.76104e-07	2.61067e-05	Pcdhac1
ENSMUSG00000007440	-0.347996	0.0677158	-5.13907	2.76104e-07	2.61067e-05	Pcdha2
ENSMUSG00000007440	-0.347996	0.0677158	-5.13907	2.76104e-07	2.61067e-05	Pcdha10
ENSMUSG00000007440	-0.347996	0.0677158	-5.13907	2.76104e-07	2.61067e-05	Pcdha4
ENSMUSG00000007440	-0.347996	0.0677158	-5.13907	2.76104e-07	2.61067e-05	Pcdha4
ENSMUSG00000007440	-0.347996	0.0677158	-5.13907	2.76104e-07	2.61067e-05	Pcdha9
ENSMUSG00000007440	-0.347996	0.0677158	-5.13907	2.76104e-07	2.61067e-05	Pcdha1
ENSMUSG00000007440	-0.347996	0.0677158	-5.13907	2.76104e-07	2.61067e-05	Pcdha12
ENSMUSG00000007440	-0.347996	0.0677158	-5.13907	2.76104e-07	2.61067e-05	Pcdhac2
ENSMUSG00000007440	-0.347996	0.0677158	-5.13907	2.76104e-07	2.61067e-05	Pcdha5
ENSMUSG00000007440	-0.347996	0.0677158	-5.13907	2.76104e-07	2.61067e-05	Pcdha1
ENSMUSG00000007440	-0.347996	0.0677158	-5.13907	2.76104e-07	2.61067e-05	Pcdha1
ENSMUSG00000007440	-0.347996	0.0677158	-5.13907	2.76104e-07	2.61067e-05	Pcdha4
ENSMUSG00000007440	-0.347996	0.0677158	-5.13907	2.76104e-07	2.61067e-05	Pcdha12
ENSMUSG00000007440	-0.347996	0.0677158	-5.13907	2.76104e-07	2.61067e-05	Pcdha5
ENSMUSG00000007440	-0.347996	0.0677158	-5.13907	2.76104e-07	2.61067e-05	Pcdhac2
ENSMUSG00000007440	-0.347996	0.0677158	-5.13907	2.76104e-07	2.61067e-05	Pcdha2
ENSMUSG00000007440	-0.347996	0.0677158	-5.13907	2.76104e-07	2.61067e-05	Pcdha9
ENSMUSG00000007440	-0.347996	0.0677158	-5.13907	2.76104e-07	2.61067e-05	Pcdha9
ENSMUSG00000007440	-0.347996	0.0677158	-5.13907	2.76104e-07	2.61067e-05	Pcdha9
ENSMUSG00000007440	-0.347996	0.0677158	-5.13907	2.76104e-07	2.61067e-05	Pcdha5
ENSMUSG00000007440	-0.347996	0.0677158	-5.13907	2.76104e-07	2.61067e-05	Pcdha1
ENSMUSG00000007440	-0.347996	0.0677158	-5.13907	2.76104e-07	2.61067e-05	Pcdha10
ENSMUSG00000007440	-0.347996	0.0677158	-5.13907	2.76104e-07	2.61067e-05	Pcdha1
ENSMUSG00000007440	-0.347996	0.0677158	-5.13907	2.76104e-07	2.61067e-05	Pcdha4
ENSMUSG00000007440	-0.347996	0.0677158	-5.13907	2.76104e-07	2.61067e-05	Pcdha4
ENSMUSG00000007440	-0.347996	0.0677158	-5.13907	2.76104e-07	2.61067e-05	Pcdha2
ENSMUSG00000007440	-0.347996	0.0677158	-5.13907	2.76104e-07	2.61067e-05	Pcdha12
ENSMUSG00000007440	-0.347996	0.0677158	-5.13907	2.76104e-07	2.61067e-05	Pcdha5
ENSMUSG00000007440	-0.347996	0.0677158	-5.13907	2.76104e-07	2.61067e-05	Pcdha9
ENSMUSG00000007440	-0.347996	0.0677158	-5.13907	2.76104e-07	2.61067e-05	Pcdha9
ENSMUSG00000007440	-0.347996	0.0677158	-5.13907	2.76104e-07	2.61067e-05	Pcdha2
ENSMUSG00000007440	-0.347996	0.0677158	-5.13907	2.76104e-07	2.61067e-05	Pcdha4
ENSMUSG00000007440	-0.347996	0.0677158	-5.13907	2.76104e-07	2.61067e-05	Pcdha1
ENSMUSG00000007440	-0.347996	0.0677158	-5.13907	2.76104e-07	2.61067e-05	Pcdha10
ENSMUSG00000007440	-0.347996	0.0677158	-5.13907	2.76104e-07	2.61067e-05	Pcdha10
ENSMUSG00000007440	-0.347996	0.0677158	-5.13907	2.76104e-07	2.61067e-05	Pcdha2
ENSMUSG00000007440	-0.347996	0.0677158	-5.13907	2.76104e-07	2.61067e-05	Pcdha5
ENSMUSG00000007440	-0.347996	0.0677158	-5.13907	2.76104e-07	2.61067e-05	Pcdha2
ENSMUSG00000007440	-0.347996	0.0677158	-5.13907	2.76104e-07	2.61067e-05	Pcdha2
ENSMUSG00000007440	-0.347996	0.0677158	-5.13907	2.76104e-07	2.61067e-05	Pcdha12
ENSMUSG00000007440	-0.347996	0.0677158	-5.13907	2.76104e-07	2.61067e-05	Pcdha2
ENSMUSG00000007440	-0.347996	0.0677158	-5.13907	2.76104e-07	2.61067e-05	Pcdhac2
ENSMUSG00000007440	-0.347996	0.0677158	-5.13907	2.76104e-07	2.61067e-05	Pcdhac2
ENSMUSG00000007440	-0.347996	0.0677158	-5.13907	2.76104e-07	2.61067e-05	Pcdha9
ENSMUSG00000007440	-0.347996	0.0677158	-5.13907	2.76104e-07	2.61067e-05	Pcdhac1
ENSMUSG00000007440	-0.347996	0.0677158	-5.13907	2.76104e-07	2.61067e-05	Pcdhac2
ENSMUSG00000007440	-0.347996	0.0677158	-5.13907	2.76104e-07	2.61067e-05	Pcdha9
ENSMUSG00000007440	-0.347996	0.0677158	-5.13907	2.76104e-07	2.61067e-05	Pcdha1
ENSMUSG00000007440	-0.347996	0.0677158	-5.13907	2.76104e-07	2.61067e-05	Pcdha1
ENSMUSG00000007440	-0.347996	0.0677158	-5.13907	2.76104e-07	2.61067e-05	Pcdha11
ENSMUSG00000007440	-0.347996	0.0677158	-5.13907	2.76104e-07	2.61067e-05	Pcdha5
ENSMUSG00000007440	-0.347996	0.0677158	-5.13907	2.76104e-07	2.61067e-05	Pcdha5
ENSMUSG00000007440	-0.347996	0.0677158	-5.13907	2.76104e-07	2.61067e-05	Pcdha12
ENSMUSG00000007440	-0.347996	0.0677158	-5.13907	2.76104e-07	2.61067e-05	Pcdha12
ENSMUSG00000007440	-0.347996	0.0677158	-5.13907	2.76104e-07	2.61067e-05	Pcdha1
ENSMUSG00000007440	-0.347996	0.0677158	-5.13907	2.76104e-07	2.61067e-05	Pcdhac2
ENSMUSG00000007440	-0.347996	0.0677158	-5.13907	2.76104e-07	2.61067e-05	Pcdhac2
ENSMUSG00000007440	-0.347996	0.0677158	-5.13907	2.76104e-07	2.61067e-05	Pcdhac1
ENSMUSG00000007440	-0.347996	0.0677158	-5.13907	2.76104e-07	2.61067e-05	Pcdhac2
ENSMUSG00000007440	-0.347996	0.0677158	-5.13907	2.76104e-07	2.61067e-05	Pcdha10
ENSMUSG00000007440	-0.347996	0.0677158	-5.13907	2.76104e-07	2.61067e-05	Pcdhac1
ENSMUSG00000007440	-0.347996	0.0677158	-5.13907	2.76104e-07	2.61067e-05	Pcdhac2
ENSMUSG00000007440	-0.347996	0.0677158	-5.13907	2.76104e-07	2.61067e-05	Pcdha2
ENSMUSG00000007440	-0.347996	0.0677158	-5.13907	2.76104e-07	2.61067e-05	Pcdha4
ENSMUSG00000007440	-0.347996	0.0677158	-5.13907	2.76104e-07	2.61067e-05	Pcdha5
ENSMUSG00000007440	-0.347996	0.0677158	-5.13907	2.76104e-07	2.61067e-05	Pcdha11
ENSMUSG00000007440	-0.347996	0.0677158	-5.13907	2.76104e-07	2.61067e-05	Pcdhac1
ENSMUSG00000007440	-0.347996	0.0677158	-5.13907	2.76104e-07	2.61067e-05	Pcdha12
ENSMUSG00000007440	-0.347996	0.0677158	-5.13907	2.76104e-07	2.61067e-05	Pcdha4
ENSMUSG00000007440	-0.347996	0.0677158	-5.13907	2.76104e-07	2.61067e-05	Pcdhac1
ENSMUSG00000007440	-0.347996	0.0677158	-5.13907	2.76104e-07	2.61067e-05	Pcdha10
ENSMUSG00000007440	-0.347996	0.0677158	-5.13907	2.76104e-07	2.61067e-05	Pcdha11
ENSMUSG00000007440	-0.347996	0.0677158	-5.13907	2.76104e-07	2.61067e-05	Pcdha11
ENSMUSG00000007440	-0.347996	0.0677158	-5.13907	2.76104e-07	2.61067e-05	Pcdha10
ENSMUSG00000007440	-0.347996	0.0677158	-5.13907	2.76104e-07	2.61067e-05	Pcdha11
ENSMUSG00000007440	-0.347996	0.0677158	-5.13907	2.76104e-07	2.61067e-05	Pcdha10
ENSMUSG00000007440	-0.347996	0.0677158	-5.13907	2.76104e-07	2.61067e-05	Pcdhac1
ENSMUSG00000007440	-0.347996	0.0677158	-5.13907	2.76104e-07	2.61067e-05	Pcdha11
ENSMUSG00000007440	-0.347996	0.0677158	-5.13907	2.76104e-07	2.61067e-05	Pcdha12
ENSMUSG00000007440	-0.347996	0.0677158	-5.13907	2.76104e-07	2.61067e-05	Pcdha12
ENSMUSG00000007440	-0.347996	0.0677158	-5.13907	2.76104e-07	2.61067e-05	Pcdha11
ENSMUSG00000007440	-0.347996	0.0677158	-5.13907	2.76104e-07	2.61067e-05	Pcdha10
ENSMUSG00000007440	-0.347996	0.0677158	-5.13907	2.76104e-07	2.61067e-05	Pcdhac1
ENSMUSG00000007440	-0.347996	0.0677158	-5.13907	2.76104e-07	2.61067e-05	Pcdhac1
ENSMUSG00000007440	-0.347996	0.0677158	-5.13907	2.76104e-07	2.61067e-05	Pcdha11
ENSMUSG00000007440	-0.347996	0.0677158	-5.13907	2.76104e-07	2.61067e-05	Pcdha11
ENSMUSG00000030092	-1.1651	0.22677	-5.13783	2.77927e-07	2.61385e-05	Cntn6
ENSMUSG00000027014	-0.718991	0.140137	-5.13063	2.88777e-07	2.70145e-05	Cwc22
ENSMUSG00000032360	-2.50785	0.489837	-5.11977	3.05903e-07	2.84651e-05	Hcrtr2
ENSMUSG00000021477	0.497472	0.0972128	5.11735	3.09851e-07	2.86808e-05	Ctsl
ENSMUSG00000037014	-1.42401	0.278593	-5.11142	3.19754e-07	2.94425e-05	Sstr4
ENSMUSG00000064293	-2.12442	0.41597	-5.10714	3.27065e-07	2.99588e-05	Cntn4
ENSMUSG00000054640	-0.327702	0.0642182	-5.10295	3.34393e-07	3.04714e-05	Slc8a1
ENSMUSG00000029822	-1.59622	0.313504	-5.09155	3.55146e-07	3.21357e-05	Osbpl3
ENSMUSG00000039145	-0.617024	0.121201	-5.09093	3.56312e-07	3.21357e-05	Camk1d
ENSMUSG00000001260	-1.43237	0.282157	-5.07649	3.84479e-07	3.42092e-05	Gabrg1
ENSMUSG00000048216	0.981689	0.193392	5.07616	3.85138e-07	3.42092e-05	Gpr85
ENSMUSG00000049001	-1.30436	0.256915	-5.07702	3.83406e-07	3.42092e-05	A930038C07Rik
ENSMUSG00000040016	-0.864857	0.170433	-5.07446	3.88589e-07	3.43423e-05	Ptger3
ENSMUSG00000083396	0.646631	0.127482	5.07232	3.92989e-07	3.45575e-05	Gm15542
ENSMUSG00000022508	-1.78015	0.351386	-5.06609	4.06078e-07	3.55308e-05	Bcl6
ENSMUSG00000046782	-1.6703	0.329925	-5.06265	4.13476e-07	3.59991e-05	4921506M07Rik
ENSMUSG00000046782	-1.6703	0.329925	-5.06265	4.13476e-07	3.59991e-05	Ttc6
ENSMUSG00000046782	-1.6703	0.329925	-5.06265	4.13476e-07	3.59991e-05	Ttc6
ENSMUSG00000046782	-1.6703	0.329925	-5.06265	4.13476e-07	3.59991e-05	4921506M07Rik
ENSMUSG00000036545	-1.57498	0.311346	-5.05862	4.223e-07	3.65862e-05	Adamts2
ENSMUSG00000021366	-0.928263	0.184338	-5.03565	4.76225e-07	4.10557e-05	Hivep1
ENSMUSG00000039115	-1.48746	0.295559	-5.0327	4.8361e-07	4.1489e-05	Itga9
ENSMUSG00000049112	-1.39128	0.2767	-5.02811	4.95328e-07	4.2288e-05	Oxtr
ENSMUSG00000038296	-1.61127	0.320546	-5.02663	4.99166e-07	4.24098e-05	Galntl4
ENSMUSG00000002190	0.879655	0.175076	5.02442	5.04954e-07	4.26953e-05	Clgn
ENSMUSG00000030616	0.95535	0.190206	5.02271	5.09477e-07	4.28716e-05	Sytl2
ENSMUSG00000048915	-2.04609	0.407678	-5.0189	5.1969e-07	4.35228e-05	Efna5
ENSMUSG00000050505	-2.09379	0.417582	-5.01409	5.32848e-07	4.44132e-05	Pcdh20
ENSMUSG00000042417	1.61762	0.323501	5.00035	5.72277e-07	4.74747e-05	Ccno
ENSMUSG00000028645	1.47855	0.296071	4.99389	5.91747e-07	4.84049e-05	Slc2a1
ENSMUSG00000045657	-1.06284	0.212789	-4.9948	5.88959e-07	4.84049e-05	Pcdhb10
ENSMUSG00000052516	-0.746895	0.149545	-4.99445	5.90036e-07	4.84049e-05	Robo2
ENSMUSG00000025289	-0.867219	0.173881	-4.98742	6.11907e-07	4.98223e-05	Prdx4
ENSMUSG00000042604	-0.994558	0.199742	-4.9792	6.38468e-07	5.17454e-05	Kcna4
ENSMUSG00000022494	-1.55904	0.313175	-4.97818	6.41847e-07	5.17806e-05	Shisa9
ENSMUSG00000053930	-1.17329	0.23573	-4.97724	6.44973e-07	5.17952e-05	Shisa6
ENSMUSG00000055148	1.56405	0.314785	4.96862	6.7431e-07	5.3905e-05	Klf2
ENSMUSG00000006127	0.544879	0.110276	4.94104	7.77056e-07	6.18374e-05	Inpp5k
ENSMUSG00000029765	-0.81259	0.165063	-4.92292	8.52619e-07	6.72422e-05	Plxna4
ENSMUSG00000046808	-1.69307	0.343906	-4.92305	8.52072e-07	6.72422e-05	Atp10d
ENSMUSG00000026156	-0.777299	0.158022	-4.91894	8.70125e-07	6.83165e-05	B3gat2
ENSMUSG00000029291	0.334573	0.0680689	4.91521	8.86856e-07	6.90139e-05	Rufy3
ENSMUSG00000053141	-0.985256	0.200448	-4.91526	8.86638e-07	6.90139e-05	Ptprt
ENSMUSG00000037211	-1.94179	0.396142	-4.90175	9.49872e-07	7.35921e-05	Spry1
ENSMUSG00000049932	0.52269	0.106783	4.89489	9.83616e-07	7.58722e-05	H2afx
ENSMUSG00000039620	-1.48933	0.304421	-4.89235	9.96409e-07	7.65234e-05	6430573F11Rik
ENSMUSG00000028680	0.829839	0.169735	4.88903	1.01332e-06	7.74837e-05	Plk3
ENSMUSG00000039385	-0.813726	0.166805	-4.87832	1.06993e-06	8.14583e-05	Cdh6
ENSMUSG00000049580	-1.10846	0.227606	-4.87005	1.11568e-06	8.45751e-05	Tsku
ENSMUSG00000075701	0.7256	0.149042	4.86843	1.12487e-06	8.49061e-05	H47
ENSMUSG00000051323	-0.675533	0.139034	-4.85878	1.18114e-06	8.8772e-05	Pcdh19
ENSMUSG00000055660	-0.757692	0.156039	-4.85577	1.19917e-06	8.97441e-05	Mettl4
ENSMUSG00000027230	-0.773871	0.159531	-4.8509	1.229e-06	9.15862e-05	Creb3l1
ENSMUSG00000019952	-0.810187	0.167184	-4.84609	1.2592e-06	9.31697e-05	Poc1b
ENSMUSG00000030638	0.611784	0.12625	4.84583	1.26084e-06	9.31697e-05	Sh3gl3
ENSMUSG00000022762	-0.932846	0.192858	-4.83696	1.31838e-06	9.7014e-05	Ncam2
ENSMUSG00000052560	-1.43834	0.297609	-4.83301	1.34486e-06	9.85505e-05	Cpne8
ENSMUSG00000024308	0.809116	0.167787	4.82227	1.41933e-06	0.000103575	Tapbp
ENSMUSG00000039960	-0.533212	0.11072	-4.81587	1.46561e-06	0.000106073	Rhou
ENSMUSG00000050663	-1.28465	0.266716	-4.81654	1.46072e-06	0.000106073	Trhde
ENSMUSG00000055184	1.2678	0.263712	4.80752	1.52814e-06	0.000110145	Fam72a
ENSMUSG00000032527	0.510314	0.106374	4.79737	1.60763e-06	0.000115402	Pccb
ENSMUSG00000051495	0.491541	0.102602	4.79073	1.66173e-06	0.0001188	Irf2bp2
ENSMUSG00000035131	-1.06905	0.223457	-4.78414	1.71721e-06	0.000121966	Fam5c
ENSMUSG00000039046	-0.629079	0.131501	-4.78383	1.71988e-06	0.000121966	Usp6nl
ENSMUSG00000018841	0.81026	0.170078	4.76404	1.89757e-06	0.000134027	Rad51l3
ENSMUSG00000052613	-1.59543	0.335203	-4.75958	1.93992e-06	0.000136469	Pcdh15
ENSMUSG00000036264	-1.95019	0.411101	-4.74382	2.09724e-06	0.000146949	Fstl4
ENSMUSG00000024798	-1.7566	0.370672	-4.73896	2.14819e-06	0.000149922	Htr7
ENSMUSG00000004040	0.657687	0.13885	4.73668	2.17251e-06	0.000150039	Stat3
ENSMUSG00000019256	-1.0044	0.212106	-4.73536	2.18662e-06	0.000150039	Ahr
ENSMUSG00000024397	0.978112	0.20655	4.73547	2.18543e-06	0.000150039	Aif1
ENSMUSG00000030315	-0.97286	0.205378	-4.73693	2.16983e-06	0.000150039	Vgll4
ENSMUSG00000091994	-0.896628	0.189369	-4.73482	2.19253e-06	0.000150039	E130317F20Rik
ENSMUSG00000026077	-1.23948	0.262075	-4.72948	2.25095e-06	0.00015344	Npas2
ENSMUSG00000055078	-1.50599	0.318532	-4.7279	2.26857e-06	0.000154044	Gabra5
ENSMUSG00000026991	-0.512809	0.108769	-4.71466	2.42116e-06	0.000163773	Pkp4
ENSMUSG00000051855	-1.11929	0.237607	-4.71067	2.46909e-06	0.000166375	Mest
ENSMUSG00000031647	-1.19179	0.253239	-4.70617	2.52414e-06	0.000169435	Mfap3l
ENSMUSG00000086802	-1.18566	0.25218	-4.70166	2.58054e-06	0.000172563	2700038G22Rik
ENSMUSG00000020638	0.801568	0.170571	4.69931	2.61036e-06	0.000173896	Cmpk2
ENSMUSG00000078429	-0.549514	0.117028	-4.69556	2.6588e-06	0.000176163	Ctdsp2
ENSMUSG00000090061	-0.846815	0.18039	-4.69436	2.67445e-06	0.000176163	3110047P20Rik
ENSMUSG00000092094	-1.82763	0.389314	-4.6945	2.67263e-06	0.000176163	Zfp804b
ENSMUSG00000022026	1.55581	0.331733	4.68996	2.73255e-06	0.000179319	Olfm4
ENSMUSG00000019831	-0.640351	0.136644	-4.68628	2.78218e-06	0.000181897	Wasf1
ENSMUSG00000036478	0.851846	0.181824	4.685	2.79954e-06	0.000182354	Btg1
ENSMUSG00000032564	-0.899302	0.192058	-4.68245	2.83466e-06	0.00018342	Cpne4
ENSMUSG00000034981	-1.30768	0.279281	-4.6823	2.83677e-06	0.00018342	Parm1
ENSMUSG00000024807	0.611061	0.130558	4.6804	2.86316e-06	0.000184449	Syvn1
ENSMUSG00000041870	0.441845	0.0944666	4.67726	2.90729e-06	0.000186608	Ankrd13a
ENSMUSG00000037990	-0.730918	0.156329	-4.67551	2.93228e-06	0.000187527	Sh3rf3
ENSMUSG00000030934	0.608086	0.130172	4.6714	2.99154e-06	0.000190624	Oat
ENSMUSG00000087177	-0.418409	0.0898849	-4.65494	3.24074e-06	0.000205758	E130307A14Rik
ENSMUSG00000031772	-0.931801	0.200696	-4.64284	3.43646e-06	0.000217399	Cntnap4
ENSMUSG00000029231	-1.37931	0.29721	-4.64085	3.46987e-06	0.000218726	Pdgfra
ENSMUSG00000036019	-1.69509	0.365341	-4.63974	3.4884e-06	0.000219109	Tmtc2
ENSMUSG00000041540	-0.619179	0.133533	-4.63689	3.53696e-06	0.000221368	Sox5
ENSMUSG00000044689	1.53807	0.332242	4.62935	3.66817e-06	0.000228767	Gm13749
ENSMUSG00000036206	-1.13625	0.246199	-4.61517	3.92781e-06	0.000244093	Sh3bp4
ENSMUSG00000019943	-0.353106	0.0765349	-4.61367	3.95628e-06	0.000244997	Atp2b1
ENSMUSG00000026344	-1.19584	0.25934	-4.6111	4.00535e-06	0.000247165	Lypd1
ENSMUSG00000024843	0.624926	0.135754	4.60337	4.15703e-06	0.000255629	Chka
ENSMUSG00000056158	-1.66306	0.361585	-4.59936	4.23782e-06	0.000259688	Car10
ENSMUSG00000028373	-1.22033	0.265666	-4.59349	4.35892e-06	0.000266182	Astn2
ENSMUSG00000030513	-1.04464	0.227491	-4.59201	4.38989e-06	0.000267145	Pcsk6
ENSMUSG00000049119	-0.514308	0.112123	-4.58698	4.49696e-06	0.000272718	Fam110b
ENSMUSG00000021947	0.733095	0.160291	4.57352	4.79591e-06	0.00028931	Cryl1
ENSMUSG00000083287	1.00255	0.219224	4.57319	4.80347e-06	0.00028931	Gm13502
ENSMUSG00000090213	0.564141	0.123432	4.57047	4.86621e-06	0.000292089	Tmem189
ENSMUSG00000025314	-0.413867	0.0906289	-4.56661	4.95685e-06	0.000296517	Ptprj
ENSMUSG00000028708	0.546562	0.11977	4.56341	5.03289e-06	0.000300046	Mknk1
ENSMUSG00000074674	0.889255	0.194914	4.5623	5.05973e-06	0.000300627	Gm10742
ENSMUSG00000020962	0.950049	0.208276	4.5615	5.07898e-06	0.000300754	Gtf2a1
ENSMUSG00000022321	-0.796086	0.174794	-4.55442	5.25315e-06	0.000309059	Cdh10
ENSMUSG00000048756	0.551114	0.121009	4.55433	5.25533e-06	0.000309059	Foxo3
ENSMUSG00000073469	0.820464	0.180177	4.55366	5.27195e-06	0.000309059	Rnaset2a
ENSMUSG00000073469	0.820464	0.180177	4.55366	5.27195e-06	0.000309059	Rnaset2a
ENSMUSG00000036533	-0.583317	0.128579	-4.53663	5.71607e-06	0.000333982	Cdc42ep3
ENSMUSG00000022416	-0.723534	0.159616	-4.53296	5.81637e-06	0.000338717	Cacna1i
ENSMUSG00000029311	0.900392	0.19877	4.52981	5.90364e-06	0.000342664	Hsd17b11
ENSMUSG00000042807	-0.832152	0.184198	-4.51771	6.25114e-06	0.000361641	Hecw2
ENSMUSG00000019907	-0.611671	0.135438	-4.51624	6.29471e-06	0.000362968	Ppp1r12a
ENSMUSG00000005672	-0.787308	0.174844	-4.50291	6.70287e-06	0.000383985	Kit
ENSMUSG00000030446	-1.68195	0.373516	-4.50301	6.69969e-06	0.000383985	Zfp273
ENSMUSG00000086198	2.04466	0.455051	4.49325	7.01433e-06	0.000400523	Gm16598
ENSMUSG00000036002	0.575076	0.128032	4.49166	7.06693e-06	0.00040222	B230312A22Rik
ENSMUSG00000030123	-0.920507	0.205555	-4.47816	7.52908e-06	0.000427142	Plxnd1
ENSMUSG00000026824	-1.12323	0.25087	-4.47736	7.5571e-06	0.000427353	Kcnj3
ENSMUSG00000031910	-0.923467	0.206705	-4.46757	7.91144e-06	0.000445957	Has3
ENSMUSG00000007682	-1.98982	0.445869	-4.46278	8.09039e-06	0.000454587	Dio2
ENSMUSG00000015776	0.516035	0.115677	4.461	8.15767e-06	0.000456908	Med22
ENSMUSG00000028351	-1.22672	0.275153	-4.45833	8.26004e-06	0.000461057	Dbc1
ENSMUSG00000031681	0.430305	0.0965306	4.4577	8.28419e-06	0.000461057	Smad1
ENSMUSG00000019487	-2.17966	0.489697	-4.45104	8.5454e-06	0.000474095	Trip10
ENSMUSG00000034586	0.519803	0.116823	4.4495	8.60699e-06	0.00047601	C630004H02Rik
ENSMUSG00000063260	-1.94379	0.436992	-4.4481	8.66331e-06	0.000477623	Syt10
ENSMUSG00000035873	-2.0695	0.465394	-4.44676	8.71761e-06	0.000479115	Pawr
ENSMUSG00000074282	-1.1843	0.266519	-4.44358	8.8474e-06	0.000484733	Zfp94
ENSMUSG00000070047	-1.64817	0.371592	-4.43544	9.18863e-06	0.000501865	Fat1
ENSMUSG00000022770	-0.881021	0.199091	-4.42521	9.63465e-06	0.000524596	Dlg1
ENSMUSG00000022103	-0.97647	0.221002	-4.41838	9.94421e-06	0.00053978	Gfra2
ENSMUSG00000022246	-0.660302	0.149799	-4.40791	1.04374e-05	0.000564807	Rai14
ENSMUSG00000020205	-1.18389	0.268636	-4.40703	1.04796e-05	0.000565352	Phlda1
ENSMUSG00000071424	-0.967097	0.219836	-4.39917	1.08667e-05	0.000584443	Grid2
ENSMUSG00000058258	0.95347	0.216911	4.39568	1.10427e-05	0.000592095	Idi1
ENSMUSG00000030093	-1.41483	0.322155	-4.39177	1.12432e-05	0.000601015	Wnt7a
ENSMUSG00000031932	2.06263	0.469989	4.38868	1.14039e-05	0.000607122	Gpr83
ENSMUSG00000039220	0.506978	0.115531	4.38825	1.14265e-05	0.000607122	Ppp1r10
ENSMUSG00000027854	0.240994	0.0549481	4.38585	1.15536e-05	0.000610943	Sike1
ENSMUSG00000028434	0.541775	0.123536	4.38558	1.15679e-05	0.000610943	Epb4.1l4b
ENSMUSG00000018589	-0.653364	0.149222	-4.37847	1.19517e-05	0.000625581	Glra2
ENSMUSG00000022324	1.11055	0.253618	4.37882	1.19321e-05	0.000625581	Matn2
ENSMUSG00000039239	-1.27069	0.290214	-4.37848	1.19512e-05	0.000625581	Tgfb2
ENSMUSG00000045613	-1.93318	0.441752	-4.37617	1.20785e-05	0.000629552	Chrm2
ENSMUSG00000056755	-1.02332	0.233859	-4.37579	1.20992e-05	0.000629552	Grm7
ENSMUSG00000020396	1.22363	0.279902	4.37164	1.23316e-05	0.000639754	Nefh
ENSMUSG00000079724	0.758479	0.173577	4.36969	1.24424e-05	0.000643601	Rnaset2b
ENSMUSG00000079724	0.758479	0.173577	4.36969	1.24424e-05	0.000643601	Rnaset2b
ENSMUSG00000034021	-0.570695	0.130725	-4.36563	1.26758e-05	0.000653752	Pds5b
ENSMUSG00000034295	-0.461095	0.105818	-4.35742	1.31603e-05	0.000676756	Fhod3
ENSMUSG00000033350	-0.91196	0.209758	-4.34768	1.37586e-05	0.000703407	Chst2
ENSMUSG00000063887	-1.01314	0.233029	-4.34768	1.37583e-05	0.000703407	Nlgn1
ENSMUSG00000033960	-0.960912	0.221056	-4.34691	1.38066e-05	0.000703817	9430020K01Rik
ENSMUSG00000028737	0.528527	0.1217	4.34288	1.40626e-05	0.000714794	Aldh4a1
ENSMUSG00000050840	-1.04898	0.241634	-4.34117	1.41729e-05	0.000718324	Cdh20
ENSMUSG00000021745	-0.579699	0.133565	-4.34021	1.42347e-05	0.000719385	Ptprg
ENSMUSG00000029577	0.327367	0.0755821	4.33128	1.48245e-05	0.000747046	Ube3b
ENSMUSG00000035274	-0.996306	0.23011	-4.32969	1.49319e-05	0.000750304	Tpbg
ENSMUSG00000038518	-0.562768	0.130413	-4.31528	1.59402e-05	0.000798688	Jarid2
ENSMUSG00000020063	0.628439	0.14595	4.30586	1.66337e-05	0.000831069	Sirt1
ENSMUSG00000030208	-2.3212	0.539784	-4.30024	1.70617e-05	0.000850039	Emp1
ENSMUSG00000074736	-1.25733	0.292604	-4.29705	1.73085e-05	0.000859898	Tmem90b
ENSMUSG00000059975	-0.917756	0.213806	-4.29248	1.76689e-05	0.000875334	Zfp74
ENSMUSG00000042202	0.348125	0.0813262	4.2806	1.86392e-05	0.000920809	Slc35e2
ENSMUSG00000027304	0.289718	0.0677139	4.27856	1.88109e-05	0.000924722	Rtf1
ENSMUSG00000054986	0.723133	0.169019	4.27841	1.88236e-05	0.000924722	Sec14l3
ENSMUSG00000027386	-1.25611	0.294125	-4.27066	1.94898e-05	0.000954782	Fbln7
ENSMUSG00000047643	-1.51478	0.355181	-4.26482	2.00065e-05	0.000977372	Gm5454
ENSMUSG00000025408	1.2977	0.304452	4.26242	2.02228e-05	0.000985205	Ddit3
ENSMUSG00000036964	1.09965	0.258081	4.26087	2.03636e-05	0.000989322	Trim17
ENSMUSG00000048661	0.617157	0.145435	4.24353	2.20027e-05	0.00106601	Lemd3
ENSMUSG00000026235	0.671574	0.158427	4.23901	2.24512e-05	0.00108178	Epha4
ENSMUSG00000085936	-1.23439	0.291173	-4.23938	2.24142e-05	0.00108178	2610307P16Rik
ENSMUSG00000003541	1.06087	0.250511	4.23483	2.28728e-05	0.00109727	Ier3
ENSMUSG00000019820	-1.20654	0.284924	-4.23458	2.28975e-05	0.00109727	Utrn
ENSMUSG00000022829	-1.00529	0.237486	-4.23306	2.30535e-05	0.00110175	Stxbp5l
ENSMUSG00000048100	0.972896	0.229891	4.23199	2.31637e-05	0.00110401	Taf13
ENSMUSG00000030309	1.11613	0.264406	4.22125	2.42948e-05	0.00115479	Caprin2
ENSMUSG00000027544	-2.33308	0.553442	-4.21559	2.49129e-05	0.00118075	Nfatc2
ENSMUSG00000045038	-0.440174	0.10443	-4.21502	2.49753e-05	0.00118075	Prkce
ENSMUSG00000027977	-1.26836	0.301212	-4.21086	2.544e-05	0.0011995	Ndst3
ENSMUSG00000014592	0.459493	0.109608	4.19216	2.7631e-05	0.00129932	Camta1
ENSMUSG00000026527	-0.81715	0.194994	-4.19065	2.78157e-05	0.00130452	Rgs7
ENSMUSG00000027395	-0.515877	0.123155	-4.18883	2.80398e-05	0.00131153	Polr1b
ENSMUSG00000034755	-1.15892	0.276803	-4.18679	2.8293e-05	0.00131987	Pcdh11x
ENSMUSG00000021895	-1.02239	0.244264	-4.18559	2.84431e-05	0.00132336	Arhgef3
ENSMUSG00000059248	-0.608338	0.145417	-4.18341	2.87167e-05	0.00133256	2009-09-01
ENSMUSG00000027227	0.641338	0.153469	4.17895	2.92863e-05	0.00135541	Sord
ENSMUSG00000050953	-1.65725	0.397782	-4.16621	3.097e-05	0.00142958	Gja1
ENSMUSG00000058454	0.673122	0.161613	4.16502	3.11328e-05	0.00143333	Dhcr7
ENSMUSG00000008575	0.639774	0.153708	4.16225	3.15122e-05	0.00144701	Nfib
ENSMUSG00000041695	-1.2864	0.30917	-4.16081	3.17118e-05	0.00145238	Kcnj2
ENSMUSG00000025577	1.02713	0.24706	4.15742	3.2186e-05	0.00147027	Cbx2
ENSMUSG00000032128	-2.7413	0.659512	-4.15656	3.23075e-05	0.001472	Robo3
ENSMUSG00000072566	-0.552747	0.133163	-4.15089	3.31182e-05	0.0015034	Pvt1
ENSMUSG00000084898	-1.14949	0.276948	-4.15055	3.31676e-05	0.0015034	Gm12371
ENSMUSG00000091267	1.07337	0.258739	4.14847	3.34702e-05	0.00151322	Gm17322
ENSMUSG00000053399	1.4055	0.339162	4.14406	3.41217e-05	0.00153872	Adamts18
ENSMUSG00000031642	-0.59998	0.144924	-4.13995	3.47374e-05	0.00156247	Sh3rf1
ENSMUSG00000029335	-0.967599	0.234084	-4.13355	3.57197e-05	0.00160256	Bmp3
ENSMUSG00000046999	-1.44723	0.35053	-4.12869	3.64835e-05	0.00163266	1110032F04Rik
ENSMUSG00000020185	-1.38372	0.335329	-4.12646	3.68386e-05	0.00164437	E2f7
ENSMUSG00000028803	0.847923	0.20566	4.12293	3.74076e-05	0.00166554	Nipal3
ENSMUSG00000024335	0.562755	0.136605	4.11957	3.79579e-05	0.00168577	Brd2
ENSMUSG00000000202	1.15962	0.282076	4.111	3.93943e-05	0.00174516	Btbd17
ENSMUSG00000027238	-0.656985	0.159861	-4.10973	3.96126e-05	0.00175042	Frmd5
ENSMUSG00000040035	0.450077	0.109999	4.09165	4.28314e-05	0.00188791	Disp2
ENSMUSG00000050244	-0.403546	0.0987326	-4.08726	4.36498e-05	0.00191917	Heatr1
ENSMUSG00000022012	-0.586116	0.143494	-4.0846	4.41535e-05	0.00193166	Enox1
ENSMUSG00000056729	-4.87779	1.19414	-4.08476	4.41223e-05	0.00193166	Gm10006
ENSMUSG00000022507	0.344111	0.0843298	4.08054	4.49315e-05	0.00196082	1810013L24Rik
ENSMUSG00000032332	-1.18273	0.290028	-4.07797	4.54298e-05	0.00197766	Col12a1
ENSMUSG00000073805	-0.735813	0.180516	-4.07617	4.57845e-05	0.00198818	Fam196a
ENSMUSG00000066595	0.609506	0.14981	4.06854	4.73082e-05	0.00204928	Mfsd7b
ENSMUSG00000015305	-0.70158	0.172546	-4.06606	4.78151e-05	0.00206109	Sash1
ENSMUSG00000028967	0.912535	0.224412	4.06634	4.77563e-05	0.00206109	Errfi1
ENSMUSG00000024812	-1.22107	0.300485	-4.06367	4.83066e-05	0.00207576	Tjp2
ENSMUSG00000037321	0.644645	0.158652	4.06326	4.83916e-05	0.00207576	Tap1
ENSMUSG00000041773	-0.539548	0.133092	-4.05395	5.03597e-05	0.00215493	Enc1
ENSMUSG00000062859	1.29453	0.319871	4.04702	5.18735e-05	0.00221432	Tcp11
ENSMUSG00000031310	0.281107	0.0695115	4.04403	5.25392e-05	0.00223731	Zmym3
ENSMUSG00000034509	0.784204	0.194013	4.04202	5.29935e-05	0.0022512	Mad2l1bp
ENSMUSG00000021759	0.5231	0.129493	4.03958	5.35466e-05	0.00226921	Ppap2a
ENSMUSG00000034098	-1.12062	0.277508	-4.03815	5.38752e-05	0.00227765	Fstl5
ENSMUSG00000036585	0.980829	0.243175	4.03342	5.49709e-05	0.0023184	Fgf1
ENSMUSG00000028838	1.49148	0.370369	4.02702	5.6488e-05	0.00237669	Extl1
ENSMUSG00000030607	-2.18094	0.542087	-4.02323	5.74047e-05	0.00240949	Acan
ENSMUSG00000021820	0.334957	0.0832883	4.02165	5.77913e-05	0.00241419	Camk2g
ENSMUSG00000051615	-0.361195	0.0898116	-4.0217	5.77804e-05	0.00241419	Rap2a
ENSMUSG00000062098	-0.87786	0.218333	-4.02075	5.80142e-05	0.00241776	Btbd3
ENSMUSG00000033308	-0.641311	0.15982	-4.01271	6.00246e-05	0.00249563	Dpyd
ENSMUSG00000026768	-1.36216	0.339652	-4.01047	6.05988e-05	0.00251357	Itga8
ENSMUSG00000037904	0.973871	0.242874	4.00977	6.07773e-05	0.00251504	Ankrd9
ENSMUSG00000056608	-0.613528	0.153212	-4.00444	6.21638e-05	0.00256637	Chd9
ENSMUSG00000022512	-2.48325	0.620875	-3.9996	6.34491e-05	0.00260719	Cldn1
ENSMUSG00000025352	0.427715	0.106928	4.00003	6.33338e-05	0.00260719	Gdf11
ENSMUSG00000050910	0.528483	0.132176	3.99832	6.37925e-05	0.00261444	Cdr2l
ENSMUSG00000051000	-1.16201	0.290698	-3.99731	6.40664e-05	0.00261444	Fam160a1
ENSMUSG00000063488	-0.939293	0.234982	-3.99729	6.40714e-05	0.00261444	Zfp167
ENSMUSG00000083261	0.52981	0.132596	3.99567	6.45129e-05	0.00262636	Gm7816
ENSMUSG00000033083	-1.14917	0.287668	-3.99479	6.4752e-05	0.00263001	Tbc1d4
ENSMUSG00000048978	-0.772401	0.193691	-3.98779	6.66914e-05	0.00270254	Nrsn1
ENSMUSG00000020483	0.630531	0.158228	3.98496	6.74925e-05	0.00272871	Dynll2
ENSMUSG00000020598	-0.46405	0.116539	-3.98193	6.83579e-05	0.00275737	Nrcam
ENSMUSG00000032017	-0.615441	0.154705	-3.97816	6.94506e-05	0.00279503	Grik4
ENSMUSG00000034912	-0.356881	0.089723	-3.97759	6.96187e-05	0.0027954	Mdga2
ENSMUSG00000020122	-1.70196	0.429108	-3.96627	7.30065e-05	0.00292475	Egfr
ENSMUSG00000056204	0.456426	0.115135	3.96427	7.36214e-05	0.00293601	Pgpep1
ENSMUSG00000058447	-0.90731	0.228851	-3.96463	7.35114e-05	0.00293601	Zfp82
ENSMUSG00000056258	-0.746259	0.188724	-3.95423	7.67806e-05	0.00305507	Kcnq3
ENSMUSG00000066158	-1.92218	0.486652	-3.94981	7.82122e-05	0.00310501	AY512931
ENSMUSG00000036026	-0.276386	0.0700889	-3.94336	8.03471e-05	0.00318258	Tmem63b
ENSMUSG00000026687	0.449556	0.11405	3.94173	8.08955e-05	0.0031971	Aldh9a1
ENSMUSG00000040372	-0.939736	0.23849	-3.94036	8.13594e-05	0.00320105	Gpr63
ENSMUSG00000090035	-1.54561	0.392223	-3.94065	8.12613e-05	0.00320105	Galnt4
ENSMUSG00000087413	1.15447	0.293354	3.93541	8.30542e-05	0.00326043	Gm11266
ENSMUSG00000020171	-0.49144	0.125021	-3.93085	8.46472e-05	0.00331557	Yeats4
ENSMUSG00000022240	-0.427913	0.10894	-3.92795	8.5673e-05	0.00334087	Ctnnd2
ENSMUSG00000027419	-0.755088	0.192223	-3.92818	8.55904e-05	0.00334087	Pcsk2
ENSMUSG00000032666	-0.535117	0.136342	-3.92482	8.67956e-05	0.00337716	1700025G04Rik
ENSMUSG00000032285	0.492182	0.125494	3.92196	8.78303e-05	0.00340987	Dnaja4
ENSMUSG00000025854	0.428891	0.109389	3.92078	8.82611e-05	0.00341905	Fam20c
ENSMUSG00000028289	-0.658988	0.168124	-3.91966	8.86735e-05	0.00341996	Epha7
ENSMUSG00000031538	1.38094	0.3523	3.91978	8.86312e-05	0.00341996	Plat
ENSMUSG00000034612	-0.480834	0.122754	-3.91707	8.9632e-05	0.00344936	Chst11
ENSMUSG00000035161	0.516296	0.131912	3.91393	9.08052e-05	0.00348688	Ints6
ENSMUSG00000002325	0.592438	0.151569	3.9087	9.27956e-05	0.00355555	Irf9
ENSMUSG00000022311	-0.769597	0.197224	-3.90216	9.53393e-05	0.00364507	Csmd3
ENSMUSG00000047921	0.384802	0.0986785	3.89955	9.637e-05	0.00367649	Trappc9
ENSMUSG00000039200	-3.41661	0.877072	-3.89548	9.80065e-05	0.00372276	Atf7ip2
ENSMUSG00000040490	-0.516193	0.132494	-3.89596	9.78097e-05	0.00372276	Lrfn2
ENSMUSG00000031286	-1.63297	0.419562	-3.89209	9.93842e-05	0.00376696	Glt28d2
ENSMUSG00000030302	-0.375433	0.0964886	-3.89095	9.98514e-05	0.00377653	Atp2b2
ENSMUSG00000049354	0.373661	0.0960665	3.8896	0.000100409	0.00378948	Dcaf7
ENSMUSG00000045382	-0.904648	0.232658	-3.88832	0.000100942	0.00380143	Cxcr4
ENSMUSG00000079020	0.425538	0.109474	3.8871	0.000101449	0.00381237	Slc45a4
ENSMUSG00000022833	-0.933199	0.240158	-3.88577	0.000102008	0.00382519	Ccdc14
ENSMUSG00000004642	0.60507	0.155899	3.88116	0.000103961	0.00389013	Slbp
ENSMUSG00000005483	1.17761	0.303473	3.88045	0.000104264	0.00389317	Dnajb1
ENSMUSG00000045954	0.908383	0.234293	3.87712	0.000105702	0.00393851	Sdpr
ENSMUSG00000046844	0.434762	0.11227	3.87246	0.000107744	0.00400515	Vat1l
ENSMUSG00000063600	-0.676529	0.174723	-3.872	0.000107946	0.00400515	Egfem1
ENSMUSG00000091324	-0.919908	0.237803	-3.86836	0.000109571	0.00405688	Gm4673
ENSMUSG00000067279	-1.4994	0.387685	-3.86758	0.000109921	0.00406129	Ppp1r3c
ENSMUSG00000022617	0.573935	0.148953	3.85312	0.000116621	0.00429983	Chkb
ENSMUSG00000031558	-1.38591	0.359881	-3.85104	0.000117617	0.00432747	Slit2
ENSMUSG00000044461	0.888506	0.230839	3.84903	0.000118585	0.00435398	Shisa2
ENSMUSG00000032350	0.708849	0.18423	3.84763	0.000119266	0.00436078	Gclc
ENSMUSG00000039137	-0.691309	0.179659	-3.84789	0.000119137	0.00436078	Whrn
ENSMUSG00000041135	-1.19055	0.309543	-3.84614	0.000119994	0.00437828	Ripk2
ENSMUSG00000041075	-1.13704	0.296001	-3.84133	0.00012237	0.00445575	Fzd7
ENSMUSG00000034488	-0.717997	0.187105	-3.83741	0.00012434	0.00451681	Edil3
ENSMUSG00000039539	-1.05229	0.274251	-3.83697	0.000124561	0.00451681	Sgcz
ENSMUSG00000038077	0.412321	0.107506	3.83534	0.000125389	0.00453748	Kcna6
ENSMUSG00000027498	-0.605275	0.157894	-3.83343	0.000126371	0.00456362	Cstf1
ENSMUSG00000059203	-1.16521	0.304515	-3.82646	0.00013	0.00468506	Il1rapl2
ENSMUSG00000016382	-0.501831	0.131232	-3.82401	0.0001313	0.00472222	Pls3
ENSMUSG00000029211	-1.09116	0.285575	-3.82093	0.000132951	0.00476112	Gabra4
ENSMUSG00000033342	-0.71416	0.186929	-3.82048	0.000133193	0.00476112	4833424O15Rik
ENSMUSG00000067787	-0.36103	0.0944876	-3.82093	0.000132951	0.00476112	Blcap
ENSMUSG00000000632	-0.473861	0.124124	-3.81763	0.00013474	0.00479689	Sez6
ENSMUSG00000040274	-1.80397	0.472486	-3.81803	0.000134519	0.00479689	Cdk6
ENSMUSG00000054555	-0.822226	0.215482	-3.81575	0.000135769	0.00481862	Adam12
ENSMUSG00000092549	-1.69805	0.445037	-3.81552	0.000135898	0.00481862	Gm20491
ENSMUSG00000021193	-0.508796	0.133446	-3.81274	0.000137435	0.00486332	Pitrm1
ENSMUSG00000059146	-0.594561	0.155974	-3.81192	0.000137891	0.00486965	Ntrk3
ENSMUSG00000021536	-0.507772	0.133303	-3.80916	0.000139442	0.00491326	Adcy2
ENSMUSG00000057706	0.714657	0.187637	3.80873	0.000139685	0.00491326	Mex3b
ENSMUSG00000026728	-1.36142	0.357495	-3.80823	0.000139968	0.0049134	Vim
ENSMUSG00000041078	-0.352504	0.0927449	-3.80079	0.000144238	0.00505322	Grid1
ENSMUSG00000041014	-0.586168	0.15428	-3.79939	0.000145052	0.00507164	Nrg3
ENSMUSG00000031134	-0.594165	0.156438	-3.79809	0.000145813	0.00508265	Rbmx
ENSMUSG00000067578	-1.75664	0.462533	-3.79787	0.000145945	0.00508265	Cbln4
ENSMUSG00000021823	1.11436	0.293495	3.79688	0.00014653	0.00508562	Vcl
ENSMUSG00000045648	-1.34209	0.353486	-3.79674	0.000146609	0.00508562	Vwc2l
ENSMUSG00000024294	0.276329	0.0728572	3.79275	0.00014899	0.00515804	Mib1
ENSMUSG00000022498	0.347519	0.0917534	3.78753	0.00015215	0.00525711	Txndc11
ENSMUSG00000031488	0.907551	0.239898	3.78307	0.000154908	0.00534191	Rab11fip1
ENSMUSG00000025139	0.336029	0.0889141	3.77925	0.000157302	0.00540325	Tollip
ENSMUSG00000039286	-0.712191	0.188444	-3.77932	0.000157255	0.00540325	Fndc3b
ENSMUSG00000057967	-0.910501	0.240965	-3.77857	0.000157734	0.00540754	Fgf18
ENSMUSG00000029334	-1.19898	0.317428	-3.77718	0.000158615	0.00542715	Prkg2
ENSMUSG00000037894	0.554078	0.146768	3.7752	0.000159881	0.00545346	H2afz
ENSMUSG00000082823	-1.59386	0.422213	-3.77501	0.000160004	0.00545346	Gm15828
ENSMUSG00000045594	0.473918	0.125558	3.7745	0.000160329	0.00545399	Glb1
ENSMUSG00000028717	0.869703	0.23051	3.77296	0.000161322	0.00547718	Tal1
ENSMUSG00000029054	-0.759116	0.201337	-3.77037	0.000163007	0.00552105	Gabrd
ENSMUSG00000042734	0.32279	0.0856205	3.77001	0.000163242	0.00552105	Ttc9
ENSMUSG00000059810	0.53294	0.141394	3.76918	0.000163785	0.00552878	Rgs3
ENSMUSG00000010025	0.444008	0.117827	3.76832	0.000164351	0.00553527	Aldh3a2
ENSMUSG00000066129	0.427852	0.113551	3.76793	0.000164607	0.00553527	Kndc1
ENSMUSG00000062078	-0.771018	0.204732	-3.76599	0.000165891	0.00556781	Qk
ENSMUSG00000030486	-0.983154	0.261094	-3.76551	0.000166208	0.00556782	Zfp108
ENSMUSG00000037594	0.64765	0.172079	3.76368	0.000167434	0.00559821	BC022687
ENSMUSG00000049811	1.10975	0.294915	3.76296	0.000167911	0.0056035	Fam161a
ENSMUSG00000025885	-0.639127	0.169934	-3.76103	0.000169214	0.00563629	Myo5b
ENSMUSG00000031431	0.964003	0.256462	3.75885	0.000170698	0.00567499	Tsc22d3
ENSMUSG00000091870	1.24	0.330669	3.74998	0.000176848	0.00586836	1700101I11Rik
ENSMUSG00000022414	-0.589908	0.157334	-3.74941	0.000177253	0.00587071	Tab1
ENSMUSG00000030145	0.52446	0.139953	3.74739	0.000178686	0.00589725	Zfp248
ENSMUSG00000032376	-0.871349	0.232525	-3.74733	0.000178725	0.00589725	Usp3
ENSMUSG00000021215	-1.27302	0.339984	-3.74435	0.000180865	0.00595668	Net1
ENSMUSG00000085210	0.69509	0.18581	3.74087	0.000183382	0.00602828	Gm16615
ENSMUSG00000055333	1.23918	0.33185	3.73416	0.000188344	0.00617985	Fat2
ENSMUSG00000021767	-0.493368	0.132147	-3.73348	0.000188855	0.00618508	Myst4
ENSMUSG00000031066	0.267146	0.071609	3.73062	0.000191012	0.00624409	Usp11
ENSMUSG00000091448	-1.56584	0.419836	-3.72965	0.000191747	0.0062565	Gm17388
ENSMUSG00000028899	0.43024	0.115399	3.72829	0.000192782	0.00627862	Taf12
ENSMUSG00000039652	0.654282	0.175611	3.72575	0.000194738	0.00633061	Cpeb3
ENSMUSG00000026576	-0.691337	0.18563	-3.72427	0.000195885	0.00633278	Atp1b1
ENSMUSG00000027384	-0.348158	0.0934647	-3.72502	0.000195299	0.00633278	2310003L22Rik
ENSMUSG00000066278	0.496579	0.13332	3.7247	0.000195546	0.00633278	Vps37b
ENSMUSG00000006678	-0.611264	0.164207	-3.72251	0.000197251	0.00635359	Pola1
ENSMUSG00000053390	-0.746741	0.200592	-3.72269	0.000197111	0.00635359	Zfp952
ENSMUSG00000045896	0.476019	0.127896	3.72192	0.000197717	0.00635695	Paip2b
ENSMUSG00000070889	-0.804736	0.216454	-3.71782	0.000200949	0.00644908	Pgap1
ENSMUSG00000091971	1.00227	0.270004	3.71207	0.000205568	0.0065853	Hspa1a
ENSMUSG00000019861	0.34227	0.0922499	3.71024	0.00020706	0.00662104	Gopc
ENSMUSG00000055632	1.23851	0.33391	3.70912	0.000207978	0.00663693	Hmcn2
ENSMUSG00000063382	0.405019	0.109207	3.70872	0.000208312	0.00663693	Bcl9l
ENSMUSG00000028399	-0.567213	0.152975	-3.70788	0.000209	0.0066468	Ptprd
ENSMUSG00000028444	0.373544	0.100813	3.70533	0.000211119	0.00670208	Cntfr
ENSMUSG00000053580	-0.516121	0.139323	-3.70449	0.000211814	0.00671203	Tanc2
ENSMUSG00000042286	1.60852	0.434406	3.70279	0.000213239	0.00674503	Stab1
ENSMUSG00000030852	0.304401	0.0822282	3.7019	0.000213989	0.0067566	Tacc2
ENSMUSG00000032374	-1.16178	0.313898	-3.70114	0.000214633	0.0067648	Plod2
ENSMUSG00000037134	0.385701	0.10444	3.69304	0.000221587	0.00696923	Prmt10
ENSMUSG00000040430	-0.421928	0.114261	-3.69267	0.000221912	0.00696923	Pitpnc1
ENSMUSG00000048251	-0.432481	0.117173	-3.69097	0.000223404	0.00699112	Bcl11b
ENSMUSG00000074909	0.306005	0.0828968	3.6914	0.000223019	0.00699112	Ranbp6
ENSMUSG00000028530	0.25581	0.0693333	3.68957	0.000224632	0.00701705	Jak1
ENSMUSG00000020961	0.678753	0.184154	3.68579	0.00022799	0.00708622	Ston2
ENSMUSG00000039485	0.440032	0.119388	3.68572	0.000228055	0.00708622	Tspyl4
ENSMUSG00000054364	0.844928	0.229212	3.68623	0.0002276	0.00708622	Rhob
ENSMUSG00000035033	-0.419593	0.113886	-3.68432	0.000229317	0.00711287	Tbr1
ENSMUSG00000019979	0.306742	0.0832743	3.68351	0.00023004	0.00712273	Apaf1
ENSMUSG00000035845	-0.544908	0.148036	-3.68091	0.000232405	0.00718331	Alg12
ENSMUSG00000048218	-0.672756	0.182957	-3.67713	0.000235876	0.00727782	Amigo2
ENSMUSG00000042686	-0.533991	0.145297	-3.67518	0.000237678	0.00732058	Jph1
ENSMUSG00000005718	-1.4114	0.384253	-3.67311	0.000239621	0.00736751	Tfap4
ENSMUSG00000026748	-0.996653	0.271403	-3.67223	0.000240442	0.00737986	Plxdc2
ENSMUSG00000036357	1.45286	0.396045	3.66842	0.000244051	0.00747757	Gpr101
ENSMUSG00000052565	0.758925	0.207019	3.66596	0.000246413	0.00753682	Hist1h1d
ENSMUSG00000021338	-0.440205	0.12017	-3.66318	0.000249103	0.00760584	Lrrc16a
ENSMUSG00000014932	-0.894824	0.244723	-3.65647	0.000255712	0.00776058	Yes1
ENSMUSG00000024978	0.403864	0.110449	3.65657	0.000255614	0.00776058	Gpam
ENSMUSG00000027739	-0.355819	0.0972919	-3.65723	0.000254953	0.00776058	Rab33b
ENSMUSG00000031298	-1.01278	0.277001	-3.65625	0.000255936	0.00776058	Gpr64
ENSMUSG00000067786	-0.450474	0.123301	-3.65346	0.000258726	0.0078317	Nnat
ENSMUSG00000020902	-0.949836	0.260032	-3.65277	0.000259428	0.00783944	Ntn1
ENSMUSG00000033285	-0.304249	0.0833235	-3.65141	0.000260802	0.00785661	Wdr3
ENSMUSG00000046854	0.670828	0.183722	3.65133	0.000260889	0.00785661	Pip5kl1
ENSMUSG00000071291	-1.03586	0.284331	-3.64314	0.000269334	0.00809706	Zfp58
ENSMUSG00000041261	-1.59727	0.438704	-3.64088	0.000271711	0.00814068	Car8
ENSMUSG00000060882	-0.686938	0.188652	-3.6413	0.000271266	0.00814068	Kcnd2
ENSMUSG00000040734	-1.12511	0.309155	-3.6393	0.000273376	0.00817663	Ppp1r13l
ENSMUSG00000046562	-0.548753	0.150859	-3.63753	0.000275262	0.00821906	Unc119b
ENSMUSG00000037286	0.349537	0.096111	3.63681	0.000276036	0.0082282	Stag1
ENSMUSG00000085386	1.26258	0.347557	3.63272	0.000280455	0.00834578	Gm13630
ENSMUSG00000031715	0.471695	0.129983	3.62889	0.000284644	0.00845614	Smarca5
ENSMUSG00000040721	-0.895792	0.247018	-3.62643	0.000287367	0.00852265	Zfhx2
ENSMUSG00000047866	0.291406	0.0804604	3.62173	0.000292639	0.00866437	Lonp2
ENSMUSG00000021147	0.537331	0.148535	3.61754	0.000297419	0.00879111	Wdr37
ENSMUSG00000041741	-1.86815	0.517647	-3.60894	0.000307452	0.00907241	Pde3a
ENSMUSG00000021273	0.474154	0.131457	3.60692	0.000309853	0.00912796	Fdft1
ENSMUSG00000026196	-1.15732	0.321115	-3.60408	0.000313258	0.00921281	Bard1
ENSMUSG00000022299	-0.485379	0.134721	-3.60285	0.000314749	0.00924081	Slc25a32
ENSMUSG00000042507	1.01277	0.281136	3.60243	0.00031526	0.00924081	C130039O16Rik
ENSMUSG00000084029	-2.31912	0.644097	-3.60057	0.000317516	0.00929144	Gm8855
ENSMUSG00000032122	-1.10634	0.307325	-3.59991	0.000318326	0.00929967	Slc37a2
ENSMUSG00000007817	-0.553371	0.153759	-3.59895	0.000319499	0.00931846	Zmiz1
ENSMUSG00000031925	-0.943899	0.262356	-3.59778	0.000320948	0.00932977	Maml2
ENSMUSG00000045268	-1.50301	0.417729	-3.59805	0.000320612	0.00932977	Zfp691
ENSMUSG00000069729	-0.448054	0.124665	-3.59406	0.00032556	0.00944822	Arid1b
ENSMUSG00000033849	-1.01072	0.281481	-3.59074	0.000329746	0.00955395	B3galt2
ENSMUSG00000029001	0.349088	0.0972662	3.589	0.000331947	0.00960191	Fbxo44
ENSMUSG00000020134	-0.674614	0.188388	-3.58098	0.00034231	0.00988539	Peli1
ENSMUSG00000032340	-0.506846	0.141677	-3.57748	0.000346923	0.0100022	Neo1
ENSMUSG00000078202	0.746745	0.208853	3.57546	0.000349612	0.0100632	Nrarp
ENSMUSG00000003341	1.48696	0.416025	3.57421	0.000351286	0.0100949	Atp8b3
ENSMUSG00000001313	0.608517	0.17031	3.57299	0.000352929	0.0101255	Rnd2
ENSMUSG00000054723	-0.691266	0.193629	-3.57005	0.00035692	0.0102234	Vmac
ENSMUSG00000054855	0.63963	0.179212	3.56912	0.000358179	0.0102428	Rnd1
ENSMUSG00000008136	0.859149	0.240783	3.56815	0.000359511	0.0102642	Fhl2
ENSMUSG00000000567	1.03607	0.290466	3.56692	0.000361205	0.0102958	Sox9
ENSMUSG00000015957	-2.79638	0.784678	-3.56373	0.00036562	0.0104048	Wnt11
ENSMUSG00000031841	-0.502817	0.141291	-3.55874	0.000372641	0.0105704	Cdh13
ENSMUSG00000047583	-0.599981	0.168584	-3.55894	0.000372348	0.0105704	Tyw3
ENSMUSG00000046182	-1.12553	0.316573	-3.55534	0.000377485	0.0106906	Gsg1l
ENSMUSG00000047098	0.410666	0.115629	3.55159	0.000382912	0.0108109	Rnf31
ENSMUSG00000081972	0.738453	0.207924	3.55155	0.000382965	0.0108109	Gm16397
ENSMUSG00000052331	-0.378943	0.106853	-3.5464	0.000390532	0.0110069	Ankrd44
ENSMUSG00000023072	-0.441818	0.124628	-3.5451	0.000392468	0.0110271	Ccdc123
ENSMUSG00000028701	-0.992239	0.279892	-3.54507	0.000392503	0.0110271	1520402A15Rik
ENSMUSG00000082229	0.564584	0.159313	3.54387	0.000394295	0.0110598	Nap1l2
ENSMUSG00000029610	-0.48635	0.137291	-3.54248	0.000396376	0.0111004	Aimp2
ENSMUSG00000087366	1.97332	0.55728	3.54098	0.00039865	0.0111464	BC042782
ENSMUSG00000033149	-2.03372	0.574743	-3.53849	0.000402425	0.0112341	Phldb2
ENSMUSG00000027355	1.31544	0.372144	3.53476	0.000408151	0.0113704	Tmco5
ENSMUSG00000060988	-0.42451	0.120106	-3.53446	0.000408602	0.0113704	Galnt13
ENSMUSG00000025373	0.239313	0.0677499	3.5323	0.000411963	0.0114458	Rnf41
ENSMUSG00000042207	0.284029	0.0805319	3.52691	0.000420436	0.0116628	Kdm5b
ENSMUSG00000024754	-0.366921	0.104126	-3.52382	0.000425369	0.011744	Tmem2
ENSMUSG00000043391	-0.56723	0.16097	-3.52383	0.000425359	0.011744	2510009E07Rik
ENSMUSG00000048439	-0.725247	0.205812	-3.52383	0.000425349	0.011744	Nupl2
ENSMUSG00000004637	0.479261	0.136194	3.51897	0.00043323	0.0119378	Wwox
ENSMUSG00000021242	0.384958	0.109405	3.51865	0.000433745	0.0119378	Npc2
ENSMUSG00000024535	0.527046	0.149825	3.51775	0.000435226	0.0119599	Snx24
ENSMUSG00000034300	0.536984	0.152674	3.51719	0.000436145	0.0119664	Fam53c
ENSMUSG00000032323	1.41259	0.402485	3.50967	0.000448663	0.0122907	Cyp11a1
ENSMUSG00000004939	1.37972	0.393514	3.50616	0.000454616	0.0124344	Itgb1bp3
ENSMUSG00000034163	-0.584794	0.166847	-3.50498	0.000456641	0.0124704	Zfc3h1
ENSMUSG00000038156	-0.909621	0.259557	-3.50451	0.000457456	0.0124733	Spon1
ENSMUSG00000050587	-0.914753	0.261155	-3.50272	0.00046053	0.0125377	Lrrc4c
ENSMUSG00000027630	-0.422121	0.120677	-3.49792	0.000468893	0.0127456	Tbl1xr1
ENSMUSG00000049538	-1.1684	0.334368	-3.49437	0.00047519	0.0128969	Adamts16
ENSMUSG00000009731	0.455546	0.13065	3.48677	0.0004889	0.0132408	Kcnd1
ENSMUSG00000032593	1.28229	0.367788	3.48651	0.00048937	0.0132408	Amigo3
ENSMUSG00000038319	0.553694	0.158847	3.4857	0.000490853	0.0132606	Kcnh2
ENSMUSG00000028517	1.78073	0.512269	3.47617	0.000508628	0.0137197	Ppap2b
ENSMUSG00000057554	0.514775	0.148126	3.47525	0.000510374	0.0137457	Lgals8
ENSMUSG00000035967	0.889532	0.256022	3.47444	0.000511929	0.0137665	Ddx26b
ENSMUSG00000031258	2.56852	0.739641	3.47266	0.000515335	0.0138369	Xkrx
ENSMUSG00000024383	0.369833	0.106632	3.46831	0.000523745	0.01402	Map3k2
ENSMUSG00000041771	-1.45451	0.419356	-3.46845	0.000523478	0.01402	Slc24a4
ENSMUSG00000074056	-1.00002	0.288502	-3.46624	0.000527785	0.0141066	Gm10615
ENSMUSG00000020917	0.444841	0.128418	3.46401	0.00053219	0.0142028	Acly
ENSMUSG00000024597	0.444972	0.128483	3.46327	0.000533654	0.0142041	Slc12a2
ENSMUSG00000031015	-1.00122	0.289124	-3.46294	0.000534312	0.0142041	Swap70
ENSMUSG00000057378	-0.676274	0.195299	-3.46276	0.000534662	0.0142041	Ryr3
ENSMUSG00000039985	-1.42844	0.412746	-3.46082	0.000538532	0.0142638	Fam60a
ENSMUSG00000047907	-0.997843	0.288317	-3.46092	0.000538331	0.0142638	Tshz2
ENSMUSG00000020953	-0.336806	0.0974202	-3.45725	0.000545721	0.0144272	Coch
ENSMUSG00000061759	-0.706048	0.20424	-3.45694	0.000546342	0.0144272	1700052N19Rik
ENSMUSG00000037434	0.636846	0.184262	3.4562	0.000547854	0.0144454	Slc30a1
ENSMUSG00000005774	0.472085	0.13669	3.45369	0.000552969	0.0145585	Rfx5
ENSMUSG00000002266	-0.869941	0.252037	-3.45164	0.000557186	0.0146164	Zim1
ENSMUSG00000020811	-0.859038	0.248851	-3.45201	0.000556423	0.0146164	Wscd1
ENSMUSG00000037031	0.901869	0.261304	3.45141	0.000557661	0.0146164	Tspan15
ENSMUSG00000024454	0.306138	0.0887751	3.44846	0.000563783	0.0147548	Hdac3
ENSMUSG00000029103	0.242087	0.0702135	3.44786	0.000565038	0.0147657	Lrpap1
ENSMUSG00000027799	-0.395742	0.114825	-3.44647	0.000567965	0.0148202	Nbea
ENSMUSG00000032827	0.256013	0.0742955	3.44588	0.000569211	0.0148307	Ppp1r9a
ENSMUSG00000048379	0.480807	0.139655	3.44282	0.000575681	0.0149771	Socs4
ENSMUSG00000022055	0.835909	0.242907	3.44127	0.000578996	0.0150411	Nefl
ENSMUSG00000031403	-0.499071	0.145053	-3.44061	0.000580413	0.0150556	Dkc1
ENSMUSG00000024533	-0.32585	0.0948224	-3.43642	0.000589447	0.0152675	Spire1
ENSMUSG00000057551	-0.430498	0.125325	-3.43506	0.000592433	0.0153222	Zfp317
ENSMUSG00000091506	-1.1847	0.345224	-3.43168	0.000599853	0.0154913	Gm17294
ENSMUSG00000000125	0.732253	0.213414	3.43114	0.000601049	0.0154995	Wnt3
ENSMUSG00000026347	-0.676445	0.197377	-3.42716	0.000609922	0.0157053	Tmem163
ENSMUSG00000024098	0.443184	0.12938	3.42544	0.00061381	0.0157823	Twsg1
ENSMUSG00000028207	-0.454334	0.132713	-3.42342	0.000618382	0.0158766	Asph
ENSMUSG00000034009	-0.811477	0.237293	-3.41973	0.00062683	0.0160701	Rxfp1
ENSMUSG00000062421	0.577273	0.16887	3.41845	0.000629789	0.0161224	Arf2
ENSMUSG00000055027	1.47159	0.430827	3.41573	0.000636122	0.0162609	Smyd1
ENSMUSG00000041915	-0.369461	0.108205	-3.41447	0.000639072	0.0163126	Ammecr1l
ENSMUSG00000021666	-0.434002	0.127207	-3.41178	0.000645392	0.01645	Gfm2
ENSMUSG00000030226	-0.356891	0.104629	-3.411	0.000647239	0.0164732	Lmo3
ENSMUSG00000064181	-0.346652	0.101663	-3.40982	0.000650053	0.0165209	Rab3ip
ENSMUSG00000030104	0.41891	0.122998	3.40582	0.000659646	0.016722	Edem1
ENSMUSG00000030605	-0.846663	0.248599	-3.40573	0.000659868	0.016722	Mfge8
ENSMUSG00000062210	-1.798	0.528087	-3.40474	0.000662263	0.0167493	Tnfaip8
ENSMUSG00000066918	-0.937717	0.275434	-3.4045	0.000662849	0.0167493	Gm17644
ENSMUSG00000034156	0.606804	0.178534	3.39881	0.000676795	0.0170772	Bzrap1
ENSMUSG00000021478	-0.590546	0.173793	-3.39799	0.000678827	0.0170965	Drd1a
ENSMUSG00000022382	-0.677148	0.199312	-3.39742	0.000680234	0.0170965	Wnt7b
ENSMUSG00000030610	-0.910442	0.267988	-3.39733	0.000680476	0.0170965	Det1
ENSMUSG00000051401	-0.913105	0.269077	-3.39347	0.000690131	0.0173143	Kctd16
ENSMUSG00000036699	0.62592	0.184475	3.39298	0.000691378	0.0173209	Zcchc12
ENSMUSG00000051379	-0.752186	0.221988	-3.38841	0.000702993	0.0175804	Flrt3
ENSMUSG00000054196	-1.28079	0.378024	-3.38812	0.000703737	0.0175804	Cthrc1
ENSMUSG00000039831	-0.809012	0.238877	-3.38674	0.000707297	0.0176443	Arhgap29
ENSMUSG00000029179	-0.760673	0.224642	-3.38616	0.000708786	0.0176564	Zcchc4
ENSMUSG00000025612	0.540848	0.159759	3.38539	0.000710764	0.0176806	Bach1
ENSMUSG00000020620	0.535319	0.158333	3.38097	0.0007223	0.0179422	Abca8b
ENSMUSG00000034071	-0.649304	0.19207	-3.38056	0.000723376	0.0179436	Zfp551
ENSMUSG00000032905	0.388818	0.11504	3.37984	0.000725287	0.0179657	Atg12
ENSMUSG00000034168	0.541089	0.160251	3.37651	0.000734117	0.0181588	6430527G18Rik
ENSMUSG00000026509	0.223507	0.0662305	3.37468	0.000739004	0.018254	Capn2
ENSMUSG00000022704	-0.495748	0.147162	-3.36871	0.000755203	0.018628	Qtrtd1
ENSMUSG00000055493	0.42841	0.127279	3.36593	0.000762868	0.0187907	Epm2a
ENSMUSG00000020963	-0.969773	0.288496	-3.36147	0.000775285	0.0190698	Tshr
ENSMUSG00000005357	0.61558	0.183178	3.36056	0.000777855	0.0190797	Slc1a6
ENSMUSG00000026249	-0.76238	0.226858	-3.3606	0.000777734	0.0190797	Serpine2
ENSMUSG00000044042	0.555105	0.165247	3.35925	0.000781548	0.0191436	Fmn1
ENSMUSG00000037260	0.343898	0.102444	3.35695	0.000788071	0.0192596	Hgsnat
ENSMUSG00000058318	-0.457805	0.136381	-3.35681	0.000788475	0.0192596	Phf21a
ENSMUSG00000025283	0.549007	0.16372	3.35332	0.000798486	0.0194565	Sat1
ENSMUSG00000038250	0.564976	0.168487	3.35323	0.000798748	0.0194565	Usp38
ENSMUSG00000029924	0.265518	0.0792027	3.35238	0.000801186	0.0194889	Slc37a3
ENSMUSG00000091456	-0.613015	0.182918	-3.35131	0.000804301	0.0195376	A930011O12Rik
ENSMUSG00000020701	0.789817	0.236098	3.34529	0.000821972	0.0199393	Tmem132e
ENSMUSG00000041112	-0.818319	0.244729	-3.34377	0.000826474	0.0200209	Elmo1
ENSMUSG00000039496	1.0598	0.317118	3.34197	0.000831872	0.020124	Cdnf
ENSMUSG00000086180	-0.98286	0.294178	-3.34104	0.000834656	0.0201636	Rmst
ENSMUSG00000031355	-1.18668	0.35532	-3.33976	0.000838514	0.020229	Arhgap6
ENSMUSG00000023092	0.303132	0.0908418	3.33693	0.000847105	0.0204083	Fhl1
ENSMUSG00000090877	1.01637	0.304619	3.33654	0.000848273	0.0204084	Hspa1b
ENSMUSG00000057880	0.698271	0.209327	3.3358	0.000850556	0.0204354	Abat
ENSMUSG00000038187	0.434579	0.130521	3.32958	0.000869781	0.0208688	Btbd10
ENSMUSG00000035653	-0.386599	0.11614	-3.32875	0.00087237	0.0209024	Lrfn5
ENSMUSG00000036432	0.694366	0.208622	3.32835	0.000873614	0.0209038	Siah2
ENSMUSG00000042660	-0.519136	0.156565	-3.31578	0.000913888	0.0218081	Wdr55
ENSMUSG00000085460	-1.74893	0.527441	-3.31588	0.00091354	0.0218081	4833422M21Rik
ENSMUSG00000091024	1.57796	0.476113	3.31425	0.000918893	0.0218978	Gm17351
ENSMUSG00000022517	0.270735	0.0817619	3.31126	0.000928757	0.0219636	Mgrn1
ENSMUSG00000026313	-0.723212	0.218394	-3.3115	0.000927967	0.0219636	Hdac4
ENSMUSG00000027074	1.27808	0.385999	3.31109	0.000929334	0.0219636	Slc43a3
ENSMUSG00000041658	0.337207	0.101807	3.31221	0.000925631	0.0219636	Rragb
ENSMUSG00000046185	-0.629974	0.1902	-3.31216	0.000925791	0.0219636	Zfp84
ENSMUSG00000047603	-0.54129	0.163411	-3.31245	0.000924823	0.0219636	Zfp235
ENSMUSG00000074785	1.12172	0.33881	3.31077	0.000930397	0.0219636	Plxnc1
ENSMUSG00000087130	-0.819641	0.24761	-3.31021	0.000932266	0.0219782	D230004N17Rik
ENSMUSG00000045875	-1.38445	0.418305	-3.30968	0.000934042	0.0219906	Adra1a
ENSMUSG00000033147	0.453649	0.137134	3.30807	0.0009394	0.0220872	Slc22a15
ENSMUSG00000029234	0.303941	0.0918903	3.30765	0.000940839	0.0220915	Tmem165
ENSMUSG00000025324	-1.50282	0.454872	-3.30382	0.000953775	0.0223654	Atp10a
ENSMUSG00000073700	0.768736	0.232857	3.30133	0.000962287	0.0225349	Klhl21
ENSMUSG00000021219	-0.7384	0.22383	-3.29894	0.000970509	0.0226671	Rgs6
ENSMUSG00000083579	-2.38655	0.723372	-3.2992	0.000969617	0.0226671	Gm15538
ENSMUSG00000086842	-1.52289	0.461716	-3.29834	0.000972594	0.0226857	Gm15681
ENSMUSG00000031328	0.685762	0.207974	3.29734	0.000976052	0.0227362	Flna
ENSMUSG00000058883	-1.24822	0.378652	-3.29649	0.000979018	0.0227751	Zfp708
ENSMUSG00000039745	0.808142	0.245331	3.29409	0.000987422	0.0229345	Htatip2
ENSMUSG00000044367	0.56543	0.171679	3.29353	0.000989364	0.0229345	Slc16a13
ENSMUSG00000055069	-0.983197	0.298534	-3.29341	0.000989783	0.0229345	Rab39
ENSMUSG00000040270	-0.426767	0.129611	-3.29267	0.000992403	0.022965	Bach2
ENSMUSG00000044770	0.61161	0.185829	3.29126	0.000997403	0.0230504	Scml4
ENSMUSG00000028385	0.401354	0.122001	3.28977	0.00100268	0.0231419	Snx30
ENSMUSG00000027695	-1.00637	0.306018	-3.28861	0.00100685	0.0232077	Pld1
ENSMUSG00000026109	-0.333986	0.101602	-3.28721	0.00101184	0.0232923	Tmeff2
ENSMUSG00000036879	-0.547087	0.16648	-3.2862	0.0010155	0.0233459	Phkb
ENSMUSG00000003279	-0.487891	0.148519	-3.28503	0.0010197	0.0234118	Dlgap1
ENSMUSG00000045969	0.915351	0.278679	3.2846	0.00102126	0.0234171	Ing1
ENSMUSG00000054556	1.18558	0.361276	3.28165	0.001032	0.0236325	Gm4876
ENSMUSG00000041040	0.348158	0.106142	3.2801	0.00103769	0.0237319	Fam117b
ENSMUSG00000092448	-0.946487	0.288607	-3.2795	0.00103993	0.0237522	Gm20387
ENSMUSG00000003644	0.621532	0.189669	3.27693	0.00104943	0.0238762	Rps6ka1
ENSMUSG00000021253	0.63425	0.193529	3.27728	0.00104813	0.0238762	Tgfb3
ENSMUSG00000028883	-0.53171	0.162229	-3.27752	0.00104723	0.0238762	Sema3a
ENSMUSG00000020451	0.352865	0.107713	3.27598	0.00105295	0.0239254	Limk2
ENSMUSG00000024420	-0.764548	0.233468	-3.27474	0.0010576	0.0239502	Zfp521
ENSMUSG00000052414	-0.657696	0.200835	-3.2748	0.00105737	0.0239502	Atf7
ENSMUSG00000086809	-1.45425	0.444101	-3.2746	0.00105813	0.0239502	2610037D02Rik
ENSMUSG00000031907	-0.565095	0.172592	-3.27416	0.00105976	0.0239563	Zfp90
ENSMUSG00000050248	0.957376	0.292477	3.27334	0.00106285	0.0239953	Evc2
ENSMUSG00000040624	-1.41283	0.431836	-3.2717	0.00106905	0.0241043	Plekhg1
ENSMUSG00000060371	-0.442919	0.13542	-3.2707	0.00107281	0.0241581	Caln1
ENSMUSG00000019731	0.361019	0.110411	3.26978	0.0010763	0.0242058	Slc35e1
ENSMUSG00000055653	0.874554	0.267502	3.26933	0.00107802	0.0242133	Gpc3
ENSMUSG00000029055	0.497159	0.152142	3.26772	0.00108416	0.0243202	Plch2
ENSMUSG00000050212	1.65974	0.508142	3.26629	0.00108966	0.0244126	Fam176b
ENSMUSG00000026220	0.605648	0.185569	3.26373	0.00109958	0.0245721	Slc16a14
ENSMUSG00000092216	0.483453	0.148122	3.26388	0.00109898	0.0245721	Gm19345
ENSMUSG00000030521	-0.592894	0.181749	-3.26216	0.00110566	0.0246664	Mphosph10
ENSMUSG00000055639	-1.13539	0.348075	-3.26192	0.0011066	0.0246664	Dach1
ENSMUSG00000046093	0.458655	0.140785	3.25784	0.00112264	0.0249922	Hpcal4
ENSMUSG00000028310	-2.83265	0.869762	-3.25682	0.00112669	0.0250507	Ppp3r2
ENSMUSG00000032394	1.06285	0.326439	3.25588	0.00113041	0.0251016	Igdcc3
ENSMUSG00000027381	-1.20251	0.369489	-3.25451	0.00113588	0.0251914	Bcl2l11
ENSMUSG00000022723	-1.30838	0.402352	-3.25182	0.00114667	0.0253985	Crybg3
ENSMUSG00000025658	-0.612171	0.188337	-3.2504	0.00115244	0.0254622	Cnksr2
ENSMUSG00000053819	-0.646915	0.199015	-3.25058	0.00115168	0.0254622	Camk2d
ENSMUSG00000087275	0.747144	0.229986	3.24865	0.00115955	0.0255873	1110002J07Rik
ENSMUSG00000062944	-0.91415	0.281459	-3.2479	0.00116259	0.0256221	9130023H24Rik
ENSMUSG00000019326	2.35585	0.725709	3.24627	0.00116926	0.0257369	Aoc3
ENSMUSG00000039037	-0.822141	0.253511	-3.24302	0.0011827	0.0260001	St6galnac5
ENSMUSG00000037892	-0.879466	0.271308	-3.24158	0.00118869	0.0260992	Pcdh18
ENSMUSG00000035431	-0.908759	0.280396	-3.24099	0.00119117	0.0261211	Sstr1
ENSMUSG00000040174	-0.599491	0.185	-3.2405	0.00119322	0.0261334	Alkbh3
ENSMUSG00000041997	-0.647048	0.199763	-3.23908	0.00119917	0.0262311	Tlk1
ENSMUSG00000031168	0.642917	0.198561	3.23788	0.0012042	0.0263084	Ebp
ENSMUSG00000042082	0.413662	0.127831	3.23601	0.00121215	0.0264492	Arsb
ENSMUSG00000074925	-0.503162	0.155509	-3.23557	0.00121398	0.0264564	Ptar1
ENSMUSG00000021973	0.433737	0.13415	3.23322	0.00122405	0.0266098	Efha1
ENSMUSG00000087306	-1.03662	0.320614	-3.23324	0.00122396	0.0266098	A230004M16Rik
ENSMUSG00000004356	-0.455661	0.141018	-3.23122	0.00123264	0.0267569	Utp20
ENSMUSG00000028226	-0.47249	0.146271	-3.23023	0.0012369	0.0267569	Mmp16
ENSMUSG00000031137	-0.449501	0.139136	-3.23067	0.00123501	0.0267569	Fgf13
ENSMUSG00000053024	0.409301	0.1267	3.23048	0.00123583	0.0267569	Cntn2
ENSMUSG00000020123	-1.17686	0.364586	-3.22794	0.00124685	0.0269391	Avpr1a
ENSMUSG00000075012	-0.610832	0.189289	-3.22699	0.00125101	0.0269958	Fjx1
ENSMUSG00000029086	-0.985904	0.305567	-3.22647	0.00125327	0.0270113	Prom1
ENSMUSG00000025646	0.312426	0.0968521	3.22581	0.00125619	0.0270411	Atrip
ENSMUSG00000027408	-0.549484	0.170414	-3.22441	0.00126232	0.0271398	Cpxm1
ENSMUSG00000030522	-0.766645	0.237838	-3.22338	0.00126685	0.0272041	Mtmr10
ENSMUSG00000034659	-0.558086	0.173194	-3.22231	0.0012716	0.0272396	Tmem109
ENSMUSG00000037813	1.02827	0.319087	3.22255	0.00127054	0.0272396	D630003M21Rik
ENSMUSG00000047030	0.276553	0.0858454	3.22152	0.00127513	0.0272818	Spata2
ENSMUSG00000016181	-0.452591	0.140529	-3.22064	0.00127906	0.0272995	Diexf
ENSMUSG00000031374	-1.09486	0.339935	-3.2208	0.00127833	0.0272995	Zfp92
ENSMUSG00000021217	-0.590408	0.183419	-3.21891	0.00128678	0.0274068	Tshz3
ENSMUSG00000046922	-1.93573	0.601378	-3.21882	0.0012872	0.0274068	Gpr6
ENSMUSG00000073617	-0.574709	0.178731	-3.2155	0.00130216	0.0276917	Hdac4
ENSMUSG00000037279	-1.56582	0.487233	-3.21369	0.00131041	0.027816	Ovol2
ENSMUSG00000077772	-3.13496	0.975553	-3.21352	0.00131117	0.027816
ENSMUSG00000048776	-2.38219	0.741431	-3.21297	0.00131371	0.0278364	Pthlh
ENSMUSG00000022371	1.20292	0.374583	3.21137	0.00132103	0.0279286	Col14a1
ENSMUSG00000029483	-0.84658	0.263623	-3.21133	0.00132124	0.0279286	Tmem132b
ENSMUSG00000030878	0.773042	0.240937	3.20848	0.00133437	0.0281723	Cdr2
ENSMUSG00000002346	-0.710253	0.221412	-3.20784	0.00133738	0.0282021	Slc25a42
ENSMUSG00000025470	-0.43677	0.136187	-3.20713	0.00134067	0.0282376	Zfp511
ENSMUSG00000033595	1.0787	0.336424	3.20638	0.00134416	0.0282704	Lgi3
ENSMUSG00000036766	-0.255749	0.0797692	-3.20611	0.00134544	0.0282704	Dner
ENSMUSG00000049969	0.518979	0.161911	3.20533	0.00134909	0.0283131	Plekhf2
ENSMUSG00000031539	0.389488	0.12153	3.20489	0.00135116	0.0283228	Ap3m2
ENSMUSG00000003316	0.184746	0.0576707	3.20346	0.00135786	0.0283624	Glg1
ENSMUSG00000027809	-0.448675	0.14006	-3.20346	0.00135789	0.0283624	Etfdh
ENSMUSG00000035429	0.890021	0.277809	3.20372	0.00135663	0.0283624	Ptprh
ENSMUSG00000032649	-0.97505	0.30441	-3.20308	0.00135967	0.0283661	Glt25d2
ENSMUSG00000058392	0.775956	0.242283	3.20268	0.00136154	0.0283714	Rrp1b
ENSMUSG00000056515	0.364141	0.113807	3.19963	0.00137606	0.02864	Rab31
ENSMUSG00000022361	0.531563	0.166204	3.19825	0.00138265	0.028743	Zhx1
ENSMUSG00000027671	-0.560438	0.175273	-3.19751	0.00138617	0.0287823	Actl6a
ENSMUSG00000001918	0.892344	0.279106	3.19716	0.00138789	0.028784	Slc1a5
ENSMUSG00000021699	-0.555923	0.173987	-3.19519	0.00139739	0.0289469	Pde4d
ENSMUSG00000021699	-0.555923	0.173987	-3.19519	0.00139739	0.0289469	Pde4d
ENSMUSG00000004473	0.600953	0.188159	3.19386	0.00140386	0.0290197	Clec11a
ENSMUSG00000025478	0.362645	0.113547	3.19379	0.00140421	0.0290197	Dpysl4
ENSMUSG00000050541	-1.50941	0.472882	-3.19195	0.00141318	0.0291709	Adra1b
ENSMUSG00000057691	-0.502685	0.157567	-3.1903	0.00142125	0.029303	Zfp746
ENSMUSG00000021340	0.702661	0.220335	3.18906	0.00142739	0.0293608	Gpld1
ENSMUSG00000038473	-0.970372	0.304276	-3.18911	0.0014271	0.0293608	Nos1ap
ENSMUSG00000054702	-0.99102	0.311044	-3.1861	0.00144203	0.0296272	Ap1s3
ENSMUSG00000053825	-0.519381	0.163145	-3.18355	0.00145479	0.0298545	Ppfia2
ENSMUSG00000040435	0.841531	0.264427	3.18247	0.00146024	0.0299316	Ppp1r15a
ENSMUSG00000019789	-1.57671	0.495611	-3.18135	0.0014659	0.0300126	Hey2
ENSMUSG00000004451	0.404487	0.127314	3.17707	0.00148769	0.0304233	Ralb
ENSMUSG00000033998	0.505106	0.159023	3.1763	0.00149167	0.0304692	Kcnk1
ENSMUSG00000024261	-0.555249	0.174986	-3.1731	0.00150821	0.0307714	Syt4
ENSMUSG00000037649	0.554365	0.174746	3.17241	0.00151179	0.0307807	H2-DMa
ENSMUSG00000052957	-0.967895	0.305137	-3.172	0.00151392	0.0307807	Gas1
ENSMUSG00000061311	1.13843	0.358877	3.17221	0.00151282	0.0307807	Rag1
ENSMUSG00000001175	-0.377762	0.119155	-3.17033	0.00152267	0.0308516	Calm1
ENSMUSG00000001175	-0.377762	0.119155	-3.17033	0.00152267	0.0308516	Calm1
ENSMUSG00000001175	-0.377762	0.119155	-3.17033	0.00152267	0.0308516	Calm1
ENSMUSG00000009569	-0.497061	0.156755	-3.17093	0.0015195	0.0308516	Mkl2
ENSMUSG00000064105	-0.546312	0.172307	-3.17057	0.00152142	0.0308516	Cnnm2
ENSMUSG00000054976	0.677368	0.213832	3.16775	0.00153622	0.0310189	9430031J16Rik
ENSMUSG00000063145	-0.615806	0.194381	-3.16803	0.00153475	0.0310189	Bbs5
ENSMUSG00000076064	-2.71208	0.856153	-3.16776	0.00153621	0.0310189	Mir690
ENSMUSG00000056427	-0.644815	0.203583	-3.16733	0.00153846	0.0310286	Slit3
ENSMUSG00000066952	2.43064	0.767883	3.16538	0.00154883	0.0312018	Myo1h
ENSMUSG00000020121	-0.465438	0.147159	-3.16282	0.00156251	0.0313338	Srgap1
ENSMUSG00000027115	-1.13117	0.357611	-3.16313	0.00156083	0.0313338	Kif18a
ENSMUSG00000036617	-0.600672	0.189898	-3.16312	0.00156086	0.0313338	Etl4
ENSMUSG00000045639	-0.335962	0.106194	-3.16368	0.00155789	0.0313338	Zfp629
ENSMUSG00000025034	0.461517	0.146006	3.16096	0.00157252	0.0314988	Trim8
ENSMUSG00000032412	0.229681	0.0727088	3.15892	0.00158354	0.0316474	Atp1b3
ENSMUSG00000037416	-0.905717	0.286702	-3.15909	0.00158261	0.0316474	Dmxl1
ENSMUSG00000019986	0.369707	0.117054	3.15843	0.0015862	0.0316597	Ahi1
ENSMUSG00000032235	-0.813995	0.257744	-3.15815	0.00158775	0.0316597	Narg2
ENSMUSG00000024302	-0.551403	0.174636	-3.15745	0.00159158	0.0317	Dtna
ENSMUSG00000086839	1.45716	0.46159	3.15683	0.00159492	0.0317306	Gm11973
ENSMUSG00000028718	2.00495	0.635378	3.15553	0.00160208	0.031812	Stil
ENSMUSG00000039849	0.491842	0.155872	3.15543	0.00160263	0.031812	Pcif1
ENSMUSG00000003134	-0.430373	0.136416	-3.15485	0.00160582	0.0318393	Tbc1d8
ENSMUSG00000045287	-0.544404	0.17266	-3.15304	0.00161582	0.0320016	Rtn4rl1
ENSMUSG00000022123	1.31191	0.416565	3.14935	0.00163636	0.032372	Scel
ENSMUSG00000038463	-0.881698	0.280097	-3.14784	0.00164484	0.0325032	Olfml2b
ENSMUSG00000049420	-0.816823	0.259635	-3.14605	0.00165493	0.0326657	Tmem200a
ENSMUSG00000018398	-0.388146	0.123436	-3.14451	0.00166365	0.0327278	2008-09-01
ENSMUSG00000030849	-0.994359	0.31621	-3.14461	0.00166307	0.0327278	Fgfr2
ENSMUSG00000040033	0.471009	0.149759	3.14511	0.00166026	0.0327278	Stat2
ENSMUSG00000024901	-0.345541	0.109934	-3.14317	0.00167128	0.0328044	Peli3
ENSMUSG00000046785	0.395828	0.125924	3.14339	0.00167003	0.0328044	Epm2aip1
ENSMUSG00000045690	-1.31529	0.41858	-3.14227	0.00167646	0.0328695	Wdr89
ENSMUSG00000004233	-0.489999	0.155971	-3.1416	0.00168029	0.0329079	Wars2
ENSMUSG00000016763	-0.482016	0.153466	-3.14088	0.00168443	0.0329315	Scube1
ENSMUSG00000021194	0.499796	0.159138	3.14064	0.00168578	0.0329315	Chga
ENSMUSG00000024070	-1.2066	0.384216	-3.14041	0.00168711	0.0329315	Prkd3
ENSMUSG00000002265	0.510868	0.162743	3.13911	0.00169463	0.0329397	Peg3
ENSMUSG00000034708	0.483862	0.15412	3.13951	0.00169232	0.0329397	Grn
ENSMUSG00000040820	0.53604	0.170766	3.13904	0.00169503	0.0329397	Hlcs
ENSMUSG00000050965	-0.577627	0.184007	-3.13915	0.00169438	0.0329397	Prkca
ENSMUSG00000032058	-0.468873	0.14942	-3.13796	0.0017013	0.0330251	Ppp2r1b
ENSMUSG00000023009	0.466774	0.148775	3.13745	0.00170425	0.0330459	Nckap5l
ENSMUSG00000026443	0.38593	0.123021	3.1371	0.0017063	0.0330492	Lrrn2
ENSMUSG00000037681	1.34771	0.429651	3.13675	0.0017083	0.0330516	Esyt3
ENSMUSG00000031227	0.263349	0.0840743	3.13233	0.00173423	0.0335164	Magee1
ENSMUSG00000044952	-0.978713	0.312657	-3.13031	0.00174624	0.0337114	Kctd21
ENSMUSG00000033569	-0.622871	0.199341	-3.12465	0.00178016	0.0342894	Bai3
ENSMUSG00000044641	0.740613	0.237027	3.12459	0.00178052	0.0342894	Pard6b
ENSMUSG00000048126	0.983728	0.314859	3.12434	0.00178203	0.0342894	Col6a3
ENSMUSG00000042700	-0.407266	0.130369	-3.12396	0.00178435	0.0342965	Sipa1l1
ENSMUSG00000057101	-0.339006	0.108533	-3.12354	0.00178688	0.0343078	Zfp180
ENSMUSG00000057101	-0.339006	0.108533	-3.12354	0.00178688	0.0343078	Zfp180
ENSMUSG00000038987	1.63729	0.525075	3.1182	0.00181958	0.0348974	1700019L03Rik
ENSMUSG00000035572	0.3306	0.106064	3.11698	0.00182713	0.0350041	Dcaf10
ENSMUSG00000031618	-0.911249	0.292455	-3.11586	0.00183408	0.035099	Nr3c2
ENSMUSG00000081816	-2.25826	0.724839	-3.11553	0.00183612	0.0350999	Gm15528
ENSMUSG00000021033	-0.511921	0.164477	-3.11241	0.00185567	0.035435	Gstz1
ENSMUSG00000049106	0.226803	0.072884	3.11184	0.00185926	0.0354651	Dcaf5
ENSMUSG00000050079	0.29118	0.0935851	3.1114	0.00186206	0.0354799	Rspry1
ENSMUSG00000029578	0.405364	0.130348	3.10986	0.00187179	0.0356267	Wipi2
ENSMUSG00000087598	-0.812783	0.261442	-3.10885	0.00187817	0.0357097	Zfp111
ENSMUSG00000060376	0.430053	0.138403	3.10725	0.00188838	0.035865	Bckdha
ENSMUSG00000030199	-0.615651	0.198227	-3.10579	0.00189771	0.0360032	Etv6
ENSMUSG00000036712	0.440813	0.141987	3.10459	0.00190544	0.036072	Cyld
ENSMUSG00000040811	0.588915	0.189682	3.10475	0.00190438	0.036072	Eml2
ENSMUSG00000033658	0.324104	0.104412	3.10409	0.00190868	0.0360947	Ddx19b
ENSMUSG00000025178	0.475499	0.153255	3.10268	0.0019178	0.036228	Pi4k2a
ENSMUSG00000039159	0.277113	0.0894228	3.0989	0.00194237	0.0366529	Ube2h
ENSMUSG00000040701	0.896517	0.289358	3.09829	0.00194638	0.0366892	Ap1g2
ENSMUSG00000022849	-0.533092	0.17217	-3.09632	0.00195938	0.0368946	Hspbap1
ENSMUSG00000042846	-0.803303	0.259795	-3.09206	0.00198773	0.0373885	Lrrtm3
ENSMUSG00000044452	-0.572131	0.185199	-3.08928	0.00200642	0.0376997	Zfp507
ENSMUSG00000056758	-2.06495	0.669576	-3.08396	0.00204262	0.038339	Hmga2
ENSMUSG00000037752	-0.918231	0.297805	-3.08333	0.00204696	0.0383793	Xkr8
ENSMUSG00000028980	-0.525508	0.170488	-3.08236	0.00205363	0.0384276	H6pd
ENSMUSG00000045201	-0.721814	0.234178	-3.08233	0.0020539	0.0384276	Lrrc3b
ENSMUSG00000087636	-1.70805	0.554276	-3.08158	0.00205903	0.0384827	Gm4660
ENSMUSG00000024642	-0.52292	0.169785	-3.07989	0.00207077	0.0386609	Tle4
ENSMUSG00000029228	0.489248	0.158898	3.07901	0.00207688	0.0387339	Lnx1
ENSMUSG00000000560	-0.689141	0.223913	-3.07772	0.00208589	0.0388513	Gabra2
ENSMUSG00000049583	-0.643618	0.209138	-3.07748	0.00208759	0.0388513	Grm5
ENSMUSG00000033805	0.597611	0.194316	3.07547	0.00210173	0.0390732	Ephx4
ENSMUSG00000037772	-0.430162	0.13998	-3.07303	0.00211899	0.0393524	Mrpl23
ENSMUSG00000052675	-0.615849	0.200482	-3.07184	0.00212743	0.0394674	Zfp112
ENSMUSG00000027955	-1.36587	0.444788	-3.07084	0.0021346	0.0395587	Fam198b
ENSMUSG00000020901	-1.28214	0.417843	-3.06848	0.00215153	0.039622	Pik3r5
ENSMUSG00000026202	0.767939	0.250159	3.0698	0.00214201	0.039622	Tuba4a
ENSMUSG00000034919	0.978664	0.318917	3.06871	0.00214985	0.039622	Ttc22
ENSMUSG00000043673	-2.63234	0.857658	-3.06921	0.00214623	0.039622	Kcns3
ENSMUSG00000044068	0.431898	0.140724	3.06912	0.00214692	0.039622	Zrsr1
ENSMUSG00000068923	0.299047	0.0974571	3.0685	0.00215139	0.039622	Syt11
ENSMUSG00000090426	-0.897342	0.292473	-3.06812	0.0021541	0.0396278	Gm17392
ENSMUSG00000034926	0.76644	0.24984	3.06772	0.00215696	0.0396389	Dhcr24
ENSMUSG00000041460	1.68856	0.550647	3.06651	0.00216572	0.0397583	Cacna2d4
ENSMUSG00000054582	1.40359	0.457896	3.06531	0.00217446	0.0398771	Pabpc1l
ENSMUSG00000024085	-0.456163	0.148979	-3.06193	0.00219915	0.0402879	Man2a1
ENSMUSG00000082169	-1.31773	0.430541	-3.06063	0.00220874	0.0404215	Gm12369
ENSMUSG00000028698	0.576986	0.188793	3.05619	0.00224169	0.0409819	Pik3r3
ENSMUSG00000022389	0.490416	0.160621	3.05326	0.00226369	0.0413411	Tef
ENSMUSG00000057842	-1.73582	0.56862	-3.0527	0.00226796	0.0413761	Zfp595
ENSMUSG00000026705	-0.38374	0.125784	-3.0508	0.00228235	0.0415525	Klhl20
ENSMUSG00000041992	-0.635639	0.208334	-3.05106	0.00228033	0.0415525	Rapgef5
ENSMUSG00000042349	0.999264	0.327651	3.04978	0.00229006	0.0416497	Ikbke
ENSMUSG00000020056	-0.45931	0.150658	-3.0487	0.00229833	0.0417569	Ccdc53
ENSMUSG00000055067	0.299041	0.0981121	3.04796	0.00230404	0.0418174	Smyd3
ENSMUSG00000087081	-1.01123	0.332313	-3.043	0.0023423	0.042468	6430590A07Rik
ENSMUSG00000020719	0.407524	0.133951	3.04232	0.00234758	0.04252	Ddx5
ENSMUSG00000041961	-0.391659	0.128771	-3.0415	0.00235401	0.0425926	Znrf3
ENSMUSG00000041930	0.785729	0.258389	3.04088	0.00235885	0.0426363	BC057022
ENSMUSG00000031622	0.244332	0.080364	3.04032	0.00236329	0.0426726	Sin3b
ENSMUSG00000037259	0.470387	0.154748	3.0397	0.00236817	0.0426857	6330439K17Rik
ENSMUSG00000072966	0.40934	0.134669	3.03961	0.00236887	0.0426857	Gprasp2
ENSMUSG00000028214	-1.85015	0.608942	-3.0383	0.00237917	0.0427809	Gem
ENSMUSG00000029776	0.475034	0.156354	3.03819	0.00238004	0.0427809	Hibadh
ENSMUSG00000058073	1.86649	0.614378	3.03801	0.00238145	0.0427809	Gm11189
ENSMUSG00000022365	0.338879	0.111563	3.03755	0.00238512	0.0428032	Derl1
ENSMUSG00000042638	1.18204	0.389448	3.03516	0.00240411	0.0430999	Gucy2c
ENSMUSG00000036437	-0.902156	0.297333	-3.03416	0.00241208	0.0431988	Npy1r
ENSMUSG00000021177	-0.494379	0.162986	-3.03325	0.00241935	0.0432849	Tdp1
ENSMUSG00000027439	0.386331	0.127396	3.03252	0.00242521	0.0433017	Gzf1
ENSMUSG00000028261	-0.527767	0.174032	-3.03258	0.00242474	0.0433017	Ndufaf4
ENSMUSG00000027207	0.406047	0.133943	3.03149	0.00243347	0.0434051	Galk2
ENSMUSG00000026185	0.694512	0.229125	3.03114	0.00243629	0.0434114	Igfbp5
ENSMUSG00000051177	-0.487478	0.160898	-3.02974	0.00244767	0.043526	Plcb1
ENSMUSG00000073411	0.556656	0.183717	3.02996	0.00244582	0.043526	H2-D1
ENSMUSG00000046441	-0.586833	0.193756	-3.02872	0.00245589	0.0436281	Ftsjd1
ENSMUSG00000027430	0.438087	0.144686	3.02785	0.00246302	0.0437105	Dtd1
ENSMUSG00000031210	0.710156	0.234714	3.02562	0.00248128	0.0439901	Gpr165
ENSMUSG00000024598	-0.59796	0.197681	-3.02488	0.0024873	0.0440526	Fbn2
ENSMUSG00000024598	-0.59796	0.197681	-3.02488	0.0024873	0.0440526	Fbn2
ENSMUSG00000061207	0.339932	0.112397	3.0244	0.00249128	0.0440787	Stk19
ENSMUSG00000026723	-0.740172	0.244845	-3.02302	0.00250266	0.0442354	Trdmt1
ENSMUSG00000091722	0.675246	0.223454	3.02186	0.00251225	0.0443603	Siah3
ENSMUSG00000009207	0.320029	0.105976	3.01984	0.00252912	0.0446135	Lnp
ENSMUSG00000026090	-0.609656	0.202143	-3.01597	0.00256159	0.0451409	2010300C02Rik
ENSMUSG00000060601	-0.3314	0.109904	-3.01536	0.0025667	0.0451858	Nr1h2
ENSMUSG00000036452	-0.346683	0.11499	-3.0149	0.00257062	0.0452095	Arhgap26
ENSMUSG00000034429	0.438533	0.145495	3.01408	0.0025776	0.0452837	Zfp707
ENSMUSG00000041607	-0.384308	0.127516	-3.0138	0.00257999	0.0452837	Mbp
ENSMUSG00000034297	-0.454287	0.151071	-3.00711	0.00263743	0.0462458	Med13
ENSMUSG00000038011	0.841427	0.279987	3.00524	0.00265373	0.0464853	Dnahc10
ENSMUSG00000025321	-0.899147	0.29923	-3.00487	0.00265692	0.0464948	Itgb8
ENSMUSG00000042308	0.319161	0.106292	3.0027	0.00267599	0.0467356	Setd1a
ENSMUSG00000050043	0.335842	0.111836	3.00298	0.00267353	0.0467356	Tmx2
ENSMUSG00000048332	-0.832777	0.277389	-3.0022	0.00268037	0.0467656	Lhfp
ENSMUSG00000074346	0.994251	0.331298	3.00107	0.00269029	0.0468921	1700095B22Rik
ENSMUSG00000020395	1.50924	0.503015	3.00038	0.00269642	0.0469108	Itk
ENSMUSG00000073240	-0.488713	0.162885	-3.00035	0.0026967	0.0469108	2410017P09Rik
ENSMUSG00000074575	-1.36344	0.454477	-3.00002	0.00269958	0.0469146	Kcng1
ENSMUSG00000093656	1.60359	0.534729	2.99888	0.0027097	0.0470439
ENSMUSG00000053025	0.49815	0.166163	2.99797	0.00271788	0.0471394	Sv2b
ENSMUSG00000022351	0.412182	0.137543	2.99676	0.00272869	0.0472802	Sqle
ENSMUSG00000022844	-0.810608	0.270591	-2.99569	0.00273827	0.0473995	Pdia5
ENSMUSG00000021476	0.395284	0.13199	2.99479	0.00274629	0.0474917	Habp4
ENSMUSG00000040605	-1.51247	0.505213	-2.99372	0.00275599	0.0476125	Bace2
ENSMUSG00000053841	0.274752	0.0917878	2.99333	0.00275947	0.0476259	Txlna
ENSMUSG00000037419	0.388369	0.129794	2.9922	0.00276971	0.0477558	Endod1
ENSMUSG00000038679	-0.853645	0.285878	-2.98604	0.00282613	0.0486808	Trps1
ENSMUSG00000024907	1.17984	0.395381	2.98406	0.00284455	0.0489503	Gal
ENSMUSG00000026315	1.02502	0.343648	2.98276	0.0028566	0.0491095	Serpinb8
ENSMUSG00000031758	0.384541	0.128956	2.98196	0.00286413	0.0491909	Cdyl2
ENSMUSG00000091819	-2.53537	0.850681	-2.9804	0.00287875	0.0493937	Gm17443
ENSMUSG00000003546	0.436051	0.146368	2.97913	0.00289064	0.0495493	Klc4
ENSMUSG00000087612	1.8949	0.636319	2.97792	0.00290214	0.0496981	A230005M16Rik
ENSMUSG00000016559	0.559831	0.18804	2.9772	0.00290897	0.0497666	H3f3b
ENSMUSG00000016559	0.559831	0.18804	2.9772	0.00290897	0.0497666	H3f3b
ENSMUSG00000016559	0.559831	0.18804	2.9772	0.00290897	0.0497666	H3f3b
ENSMUSG00000016559	0.559831	0.18804	2.9772	0.00290897	0.0497666	H3f3b
ENSMUSG00000016559	0.559831	0.18804	2.9772	0.00290897	0.0497666	H3f3b
ENSMUSG00000052920	-0.58317	0.195903	-2.97683	0.00291245	0.0497777	Prkg1
ENSMUSG00000038957	-0.224545	0.0754443	-2.97631	0.00291744	0.0497864	Edc3
ENSMUSG00000040929	-0.769112	0.258422	-2.97618	0.00291862	0.0497864	Rfx3
ENSMUSG00000092033	-0.770711	0.259088	-2.97471	0.00293269	0.0499779	A730056A06Rik
ENSMUSG00000037857	0.556184	0.187027	2.97382	0.00294118	0.0500741	Nufip2
ENSMUSG00000002996	-1.00913	0.339428	-2.97302	0.00294884	0.050156	Hbp1
ENSMUSG00000044626	-1.90311	0.640373	-2.97187	0.0029599	0.0502954	Liph
ENSMUSG00000032077	-0.420729	0.141632	-2.97058	0.00297238	0.0504588	Bud13
ENSMUSG00000091053	-0.893462	0.30088	-2.96949	0.00298292	0.0505888	Gm9742
ENSMUSG00000028669	0.538523	0.181427	2.96825	0.00299498	0.0507444	1110049F12Rik
ENSMUSG00000027342	0.382861	0.129028	2.96728	0.0030045	0.0508567	Pcna
ENSMUSG00000079419	-1.4462	0.487445	-2.9669	0.00300822	0.0508708	Ms4a6c
ENSMUSG00000076433	1.06312	0.358438	2.96599	0.00301711	0.0509721	BC100451
ENSMUSG00000043301	-0.674869	0.227746	-2.96325	0.00304406	0.051378	Kcnj6
ENSMUSG00000031458	0.406894	0.137352	2.96241	0.00305241	0.0514653	2410022L05Rik
ENSMUSG00000031575	0.263285	0.0888834	2.96214	0.00305509	0.0514653	Ash2l
ENSMUSG00000073514	-0.317947	0.107395	-2.96053	0.00307111	0.0516857	Dok6
ENSMUSG00000028982	0.4965	0.167801	2.95885	0.00308785	0.0519178	Slc25a33
ENSMUSG00000023967	-0.354642	0.119944	-2.95672	0.00310929	0.0522284	Mrps18a
ENSMUSG00000022054	0.85169	0.288124	2.95599	0.00311671	0.052303	Nefm
ENSMUSG00000032562	0.321771	0.108978	2.95261	0.00315101	0.0528282	Gnai2
ENSMUSG00000059309	0.643728	0.218169	2.95059	0.00317167	0.0531113	Hist1h3f
ENSMUSG00000059309	0.643728	0.218169	2.95059	0.00317167	0.0531113	Hist1h3f
ENSMUSG00000059309	0.643728	0.218169	2.95059	0.00317167	0.0531113	Hist1h3f
ENSMUSG00000059309	0.643728	0.218169	2.95059	0.00317167	0.0531113	Hist1h3f
ENSMUSG00000059309	0.643728	0.218169	2.95059	0.00317167	0.0531113	Hist1h3f
ENSMUSG00000059309	0.643728	0.218169	2.95059	0.00317167	0.0531113	Hist1h3f
ENSMUSG00000059309	0.643728	0.218169	2.95059	0.00317167	0.0531113	Hist1h3f
ENSMUSG00000059309	0.643728	0.218169	2.95059	0.00317167	0.0531113	Hist1h3f
ENSMUSG00000083392	0.854287	0.289553	2.95037	0.00317393	0.0531113	Gm6335
ENSMUSG00000019836	1.21297	0.411403	2.94838	0.00319439	0.0534029	Amd-ps4
ENSMUSG00000036469	-0.427171	0.144914	-2.94776	0.00320082	0.0534595	2001-03-01
ENSMUSG00000033735	0.707696	0.240263	2.9455	0.00322428	0.0538002	Spr
ENSMUSG00000037935	-0.212782	0.072262	-2.9446	0.00323376	0.0539073	Smarce1
ENSMUSG00000035623	0.232703	0.0790707	2.94298	0.00325074	0.054139	Rsf1
ENSMUSG00000049985	0.806847	0.274389	2.94052	0.00327662	0.0545183	Ankrd55
ENSMUSG00000005501	-0.625912	0.212931	-2.93951	0.00328731	0.0546446	Usp40
ENSMUSG00000070802	0.495587	0.16885	2.93508	0.00333464	0.055379	Pnmal2
ENSMUSG00000070498	-0.882622	0.300748	-2.93476	0.00333809	0.055384	Tmem132b
ENSMUSG00000038991	0.275121	0.0937896	2.93338	0.0033529	0.0555273	Txndc5
ENSMUSG00000087038	-0.726515	0.247672	-2.93337	0.00335304	0.0555273	2900079G21Rik
ENSMUSG00000026578	0.451179	0.15386	2.9324	0.00336352	0.0556484	4930455F23Rik
ENSMUSG00000030231	-0.493273	0.168318	-2.9306	0.00338309	0.0559196	Plekha5
ENSMUSG00000026321	-0.492445	0.168131	-2.92893	0.00340129	0.0561676	Tnfrsf11a
ENSMUSG00000020335	-0.918338	0.313623	-2.92815	0.00340981	0.0562554	Zfp354b
ENSMUSG00000025203	0.349535	0.119399	2.92745	0.00341752	0.0563299	Scd2
ENSMUSG00000057963	-0.286303	0.0978257	-2.92667	0.00342612	0.0564187	Itpk1
ENSMUSG00000022434	0.397318	0.135777	2.92625	0.00343076	0.0564423	Fam118a
ENSMUSG00000024593	-0.962348	0.328958	-2.92544	0.00343967	0.0565359	Megf10
ENSMUSG00000006800	-0.810273	0.277227	-2.92278	0.00346916	0.0568084	Sulf2
ENSMUSG00000015605	0.621797	0.212731	2.92293	0.00346755	0.0568084	Srf
ENSMUSG00000039126	0.583834	0.199749	2.92283	0.00346865	0.0568084	Prune2
ENSMUSG00000056429	0.277741	0.0950255	2.92281	0.00346889	0.0568084	Tgoln1
ENSMUSG00000056429	0.277741	0.0950255	2.92281	0.00346889	0.0568084	Tgoln1
ENSMUSG00000028441	0.674069	0.23076	2.92109	0.00348813	0.0570658	1110017D15Rik
ENSMUSG00000038446	-0.602859	0.206425	-2.92048	0.00349498	0.0571247	Cdc40
ENSMUSG00000073429	2.00187	0.685946	2.91841	0.00351818	0.0574506	C130040N14Rik
ENSMUSG00000038806	0.336919	0.115485	2.91742	0.0035294	0.0575804	BC031781
ENSMUSG00000093226	-0.772156	0.264826	-2.9157	0.00354886	0.0578442
ENSMUSG00000049604	2.16481	0.743127	2.91311	0.00357846	0.0582725	Hoxb13
ENSMUSG00000035776	0.321109	0.11041	2.90833	0.00363359	0.0591157	Cd99l2
ENSMUSG00000038048	-0.833141	0.286535	-2.90764	0.00364173	0.0591933	Cntnap5c
ENSMUSG00000043456	-1.06112	0.365041	-2.90686	0.0036508	0.059286	Zfp536
ENSMUSG00000043903	-0.802212	0.27601	-2.90646	0.00365542	0.0593062	Gm22
ENSMUSG00000028172	-1.5413	0.530536	-2.90518	0.00367039	0.0594942	Tacr3
ENSMUSG00000051285	0.552695	0.190291	2.90448	0.00367864	0.059573	Pcmtd1
ENSMUSG00000047434	0.43228	0.148849	2.90415	0.00368249	0.0595804	AI480653
ENSMUSG00000023827	0.315441	0.108644	2.90343	0.00369097	0.0596628	Agpat4
ENSMUSG00000021094	0.851166	0.29351	2.89995	0.00373219	0.0602184	Dhrs7
ENSMUSG00000040560	0.28923	0.0997329	2.90005	0.00373104	0.0602184	Wdr7
ENSMUSG00000022376	-0.545651	0.188288	-2.89797	0.00375591	0.0605199	Adcy8
ENSMUSG00000091825	-2.04819	0.706805	-2.89781	0.00375776	0.0605199	Gm5778
ENSMUSG00000074872	0.913038	0.315196	2.89673	0.00377077	0.0606739	Ctxn2
ENSMUSG00000029838	-0.438831	0.151563	-2.89537	0.00378711	0.060881	Ptn
ENSMUSG00000020491	-0.641656	0.221647	-2.89495	0.00379223	0.0609038	2810021J22Rik
ENSMUSG00000025650	1.32563	0.457954	2.89468	0.00379545	0.0609038	Col7a1
ENSMUSG00000026778	-0.641054	0.221681	-2.89178	0.00383064	0.0614125	Prkcq
ENSMUSG00000053574	-0.823963	0.285063	-2.89046	0.00384673	0.0616142	4930563E22Rik
ENSMUSG00000085527	-0.772335	0.267246	-2.88998	0.00385267	0.0616532	Gm15535
ENSMUSG00000002910	0.57706	0.199742	2.88903	0.0038643	0.0617831	Arrdc2
ENSMUSG00000055421	-0.663669	0.229823	-2.88774	0.00388016	0.0619489	Pcdh9
ENSMUSG00000086370	-0.632661	0.219094	-2.88762	0.00388171	0.0619489	B230206F22Rik
ENSMUSG00000037169	-0.66872	0.23166	-2.88664	0.00389376	0.0620285	Mycn
ENSMUSG00000037605	-0.294651	0.102064	-2.88693	0.00389024	0.0620285	Lphn3
ENSMUSG00000020817	0.158895	0.0550723	2.88521	0.00391157	0.0621434	Rabep1
ENSMUSG00000027778	-0.617533	0.213998	-2.88569	0.00390558	0.0621434	Ift80
ENSMUSG00000034158	0.292092	0.101228	2.88549	0.00390804	0.0621434	Lrrc58
ENSMUSG00000041556	0.806319	0.279571	2.88413	0.00392494	0.0622995	Fbxo2
ENSMUSG00000005142	0.532015	0.184606	2.88189	0.00395292	0.0626871	Man2b1
ENSMUSG00000017466	0.315289	0.109441	2.88091	0.00396526	0.0628261	Timp2
ENSMUSG00000027562	-1.06954	0.371528	-2.87877	0.00399225	0.0631968	Car2
ENSMUSG00000005087	-1.05464	0.366521	-2.87743	0.00400927	0.0634092	Cd44
ENSMUSG00000074899	1.36772	0.475538	2.87615	0.00402559	0.0636101	Spnb5
ENSMUSG00000001143	0.327275	0.113852	2.87456	0.00404589	0.0636563	Lman2l
ENSMUSG00000005103	0.456804	0.158902	2.87475	0.00404345	0.0636563	Wdr1
ENSMUSG00000021069	0.616974	0.214622	2.8747	0.00404413	0.0636563	Pygl
ENSMUSG00000032267	-0.32816	0.114173	-2.87422	0.00405023	0.0636563	Usp28
ENSMUSG00000033981	-0.489784	0.170395	-2.8744	0.00404795	0.0636563	Gria2
ENSMUSG00000056296	0.782772	0.272222	2.87549	0.00403405	0.0636563	Synpr
ENSMUSG00000046862	0.358071	0.124621	2.87328	0.00406235	0.0636761	Pramef8
ENSMUSG00000053600	-0.65292	0.227232	-2.87337	0.00406118	0.0636761	Zfp472
ENSMUSG00000063894	-0.592448	0.206187	-2.87336	0.00406135	0.0636761	Zfp192
ENSMUSG00000017978	-1.43658	0.500053	-2.87287	0.00406766	0.0637025	Cadps2
ENSMUSG00000028410	0.578362	0.201477	2.87061	0.00409679	0.0641017	Dnaja1
ENSMUSG00000046324	0.431713	0.150455	2.86939	0.00411264	0.0642925	Ermp1
ENSMUSG00000028333	-0.507608	0.176985	-2.86809	0.00412962	0.0644116	Anp32b
ENSMUSG00000071860	-0.714736	0.249192	-2.86822	0.00412791	0.0644116	2900055J20Rik
ENSMUSG00000078768	-0.795724	0.277453	-2.86796	0.00413125	0.0644116	Zfp566
ENSMUSG00000042747	0.303435	0.105822	2.86742	0.00413829	0.0644643	Krtcap2
ENSMUSG00000040843	0.287992	0.100481	2.86615	0.00415498	0.0646098	Tiprl
ENSMUSG00000058346	-0.912082	0.318206	-2.86633	0.00415266	0.0646098	Ces5a
ENSMUSG00000024056	-1.52405	0.531814	-2.86576	0.00416006	0.0646317	Ndc80
ENSMUSG00000051499	-0.647334	0.225959	-2.86483	0.00417234	0.0647651	Zfp786
ENSMUSG00000037795	0.478561	0.167154	2.86299	0.0041966	0.0650843	N4bp2
ENSMUSG00000062319	-0.956572	0.334207	-2.86221	0.00420698	0.0651877	Gm10115
ENSMUSG00000092901	-1.93229	0.675179	-2.86189	0.00421121	0.0651959	Mir5130
ENSMUSG00000087656	-0.753354	0.263282	-2.8614	0.00421774	0.0652396	Gm13390
ENSMUSG00000024456	0.435201	0.152195	2.85949	0.00424319	0.0655756	Diap1
ENSMUSG00000031513	0.362716	0.12701	2.85581	0.00429272	0.0662827	Leprotl1
ENSMUSG00000072728	-0.946209	0.331369	-2.85545	0.00429753	0.0662988	Gm16434
ENSMUSG00000072728	-0.946209	0.331369	-2.85545	0.00429753	0.0662988	Gm16434
ENSMUSG00000008763	0.267557	0.0937365	2.85436	0.00431242	0.0663539	Man1a2
ENSMUSG00000009216	-0.389924	0.136598	-2.85454	0.00430994	0.0663539	Fam163b
ENSMUSG00000052942	-0.793177	0.277872	-2.85447	0.00431086	0.0663539	Glis3
ENSMUSG00000010045	0.359676	0.12608	2.85275	0.00433427	0.0666318	Tmem115
ENSMUSG00000021743	-0.528202	0.185208	-2.85194	0.00434534	0.0667036	Fezf2
ENSMUSG00000039599	-0.347604	0.121887	-2.85185	0.00434653	0.0667036	Fam149b
ENSMUSG00000055775	-0.996025	0.349744	-2.84787	0.0044013	0.0674854	Myh8
ENSMUSG00000036615	-0.335841	0.117965	-2.84697	0.00441376	0.0674998	Rfxap
ENSMUSG00000046169	-1.43907	0.505431	-2.84721	0.00441037	0.0674998	Adamts6
ENSMUSG00000057387	1.66606	0.585184	2.84706	0.00441249	0.0674998	4922502B01Rik
ENSMUSG00000040667	0.221031	0.0776824	2.84531	0.0044368	0.0677932	Nup88
ENSMUSG00000027999	0.319134	0.112268	2.84261	0.0044746	0.068307	Pla2g12a
ENSMUSG00000034235	-0.661792	0.232832	-2.84235	0.00447819	0.068307	Usp54
ENSMUSG00000026918	0.240721	0.0847003	2.84203	0.00448268	0.0683161	Brd3
ENSMUSG00000082999	-0.611368	0.215279	-2.83989	0.00451285	0.0687165	Gm13238
ENSMUSG00000003762	0.404078	0.142414	2.83734	0.0045491	0.0692085	Adck4
ENSMUSG00000020135	0.339754	0.119856	2.83469	0.00458701	0.0697249	Apc2
ENSMUSG00000021501	0.308994	0.109018	2.83434	0.00459197	0.0697401	Caml
ENSMUSG00000034853	-0.511718	0.180606	-2.83334	0.00460637	0.0698984	Acot11
ENSMUSG00000006498	0.482486	0.170394	2.83159	0.00463166	0.0701611	Ptbp1
ENSMUSG00000045103	-0.434797	0.153549	-2.83165	0.00463091	0.0701611	Dmd
ENSMUSG00000010311	0.671107	0.23706	2.83096	0.00464082	0.0702107	Optc
ENSMUSG00000045777	0.942427	0.332917	2.83082	0.00464292	0.0702107	6330512M04Rik
ENSMUSG00000058740	0.43946	0.155299	2.82978	0.00465806	0.0703792	Kcnt1
ENSMUSG00000043165	0.905882	0.320172	2.82936	0.00466417	0.0704109	Lor
ENSMUSG00000075873	1.704	0.602322	2.82906	0.00466851	0.070416
ENSMUSG00000040875	-0.379731	0.134276	-2.82798	0.00468421	0.0705922	Osbpl10
ENSMUSG00000091877	-0.857634	0.303334	-2.82736	0.00469332	0.0706691	Gm17699
ENSMUSG00000022401	-0.419874	0.148592	-2.82569	0.0047179	0.0708571	Xpnpep3
ENSMUSG00000056752	0.5268	0.186415	2.82595	0.00471409	0.0708571	Dnahc9
ENSMUSG00000062778	1.34558	0.476163	2.82588	0.00471504	0.0708571	Chia
ENSMUSG00000020190	0.470888	0.166737	2.82413	0.00474086	0.0711412	Mknk2
ENSMUSG00000051065	-0.441703	0.156436	-2.82355	0.00474954	0.0712107	1600021P15Rik
ENSMUSG00000064120	-0.636081	0.225326	-2.82294	0.00475852	0.0712846	Mocs1
ENSMUSG00000024507	-0.380337	0.134781	-2.82189	0.00477417	0.071399	Hsd17b4
ENSMUSG00000040415	0.264906	0.0938758	2.82188	0.00477428	0.071399	Dtx3
ENSMUSG00000046607	0.555227	0.196786	2.82147	0.00478041	0.07143	Hrk
ENSMUSG00000021481	0.390945	0.138703	2.81858	0.00482373	0.0719375	Zfp346
ENSMUSG00000051184	-0.971514	0.344669	-2.81869	0.00482202	0.0719375	Zfp524
ENSMUSG00000079722	0.877406	0.311316	2.81838	0.00482665	0.0719375	Ttll2
ENSMUSG00000087259	0.539738	0.191582	2.81726	0.00484352	0.0721278	2610035D17Rik
ENSMUSG00000066042	-0.687814	0.244309	-2.81534	0.0048726	0.0724995	Med18
ENSMUSG00000048264	-0.342809	0.12178	-2.815	0.00487778	0.0725153	Dip2c
ENSMUSG00000020393	-0.755123	0.268399	-2.81343	0.00490156	0.0728072	Kremen1
ENSMUSG00000030720	-0.498253	0.177142	-2.81274	0.00491214	0.0728413	Cln3
ENSMUSG00000062760	-0.421958	0.150008	-2.8129	0.00490966	0.0728413	1810041L15Rik
ENSMUSG00000000861	0.383457	0.136451	2.81023	0.00495065	0.0733506	Bcl11a
ENSMUSG00000028294	-1.18987	0.423722	-2.80815	0.00498275	0.073764	1700003M02Rik
ENSMUSG00000021943	-1.04878	0.373665	-2.80672	0.00500482	0.073972	Gdf10
ENSMUSG00000034729	-0.254691	0.0907439	-2.8067	0.00500521	0.073972	Mrps10
ENSMUSG00000029403	0.456648	0.162725	2.80627	0.00501193	0.074009	Cdkl2
ENSMUSG00000036721	-0.830844	0.296147	-2.80551	0.00502373	0.0740957	Zscan12
ENSMUSG00000056073	-0.492071	0.175404	-2.80535	0.00502622	0.0740957	Grik2
ENSMUSG00000006442	-0.354276	0.126328	-2.8044	0.00504096	0.0742507	Srm
ENSMUSG00000027698	0.422546	0.150704	2.80381	0.0050503	0.0743227	Nceh1
ENSMUSG00000090246	0.287279	0.10247	2.80355	0.0050543	0.0743227	Gm17017
ENSMUSG00000021939	0.259783	0.0927788	2.80002	0.00510992	0.0750538	Ctsb
ENSMUSG00000040459	-0.43561	0.155583	-2.79986	0.00511255	0.0750538	Arglu1
ENSMUSG00000033581	-0.830868	0.29696	-2.79791	0.00514339	0.0754436	Igf2bp2
ENSMUSG00000030987	0.317214	0.113432	2.79651	0.00516586	0.0757099	Stim1
ENSMUSG00000029178	-0.570012	0.203896	-2.79561	0.00518024	0.0758243	Klf3
ENSMUSG00000031309	-0.450671	0.161214	-2.79548	0.00518228	0.0758243	Rps6ka3
ENSMUSG00000019878	-0.299149	0.107069	-2.79398	0.00520639	0.0761137	Hsf2
ENSMUSG00000041688	0.474441	0.169959	2.79151	0.00524628	0.0765082	Amot
ENSMUSG00000042138	-0.4668	0.167222	-2.7915	0.00524643	0.0765082	BC024479
ENSMUSG00000056501	0.903152	0.323489	2.79191	0.00523981	0.0765082	Cebpb
ENSMUSG00000053286	-0.490327	0.175689	-2.79088	0.00525648	0.0765912	1190005F20Rik
ENSMUSG00000040600	3.14321	1.12654	2.79015	0.00526829	0.0766999	Eps8l3
ENSMUSG00000040254	-0.807893	0.289659	-2.78912	0.00528515	0.0768792	Sema3d
ENSMUSG00000045252	0.354821	0.127228	2.78886	0.00528935	0.0768792	Zfp574
ENSMUSG00000021715	-0.492551	0.176666	-2.78803	0.005303	0.0769558	Cwc27
ENSMUSG00000022836	-1.22909	0.44087	-2.78787	0.00530564	0.0769558	Mylk
ENSMUSG00000084865	-1.39633	0.500884	-2.78774	0.00530775	0.0769558	Gm15723
ENSMUSG00000022370	0.378147	0.135695	2.78675	0.00532398	0.0771275	Mrpl13
ENSMUSG00000003752	0.74333	0.266807	2.78603	0.00533587	0.0772362	Itpkc
ENSMUSG00000012296	-0.771857	0.277193	-2.78454	0.00536035	0.077463	Tjap1
ENSMUSG00000021991	-0.519575	0.186581	-2.78471	0.00535749	0.077463	Cacna2d3
ENSMUSG00000031843	-0.834618	0.299851	-2.78344	0.00537855	0.0776622	Mphosph6
ENSMUSG00000019888	-0.836069	0.300425	-2.78296	0.0053866	0.0777146	Mgat4c
ENSMUSG00000065564	1.0584	0.380392	2.7824	0.0053959	0.077785	Mirlet7b
ENSMUSG00000019768	-0.859859	0.309142	-2.78144	0.00541184	0.0778375	Esr1
ENSMUSG00000043432	0.458442	0.164811	2.78162	0.00540887	0.0778375	Leng9
ENSMUSG00000047747	0.273007	0.0981554	2.78138	0.00541282	0.0778375	Rnf150
ENSMUSG00000054074	0.752004	0.270492	2.78014	0.00543361	0.0780727	2810030E01Rik
ENSMUSG00000028082	-0.558712	0.201051	-2.77896	0.00545335	0.0782924	Sh3d19
ENSMUSG00000005615	0.296735	0.106859	2.7769	0.00548807	0.0786821	Pcyt1a
ENSMUSG00000026427	-0.22959	0.0826809	-2.77681	0.00548945	0.0786821	Eif2d
ENSMUSG00000004105	-1.28366	0.462352	-2.77636	0.00549709	0.0786848	Angptl2
ENSMUSG00000086313	-1.71384	0.617316	-2.77627	0.00549859	0.0786848	Gm15940
ENSMUSG00000031111	0.550415	0.198319	2.77541	0.00551321	0.0788299	Igsf1
ENSMUSG00000000001	0.399554	0.144046	2.7738	0.00554056	0.0789331	Gnai3
ENSMUSG00000004562	0.510423	0.183955	2.77471	0.00552504	0.0789331	Arhgef40
ENSMUSG00000007379	-1.44862	0.522241	-2.77386	0.00553948	0.0789331	Dennd2c
ENSMUSG00000022124	-0.29084	0.104841	-2.77412	0.00553517	0.0789331	Fbxl3
ENSMUSG00000083797	-3.61949	1.30495	-2.77367	0.00554287	0.0789331	Gm13800
ENSMUSG00000025912	-1.07543	0.387794	-2.7732	0.00555085	0.0789828	Mybl1
ENSMUSG00000026614	0.385807	0.139145	2.7727	0.00555926	0.0790386	Slc30a10
ENSMUSG00000042626	0.58367	0.210543	2.77221	0.00556777	0.0790957	Shc1
ENSMUSG00000040289	-0.575182	0.207537	-2.77147	0.00558043	0.0792114	Hey1
ENSMUSG00000022075	-0.451607	0.163003	-2.77055	0.00559611	0.079314	Rhobtb2
ENSMUSG00000030337	0.524929	0.189469	2.77052	0.00559667	0.079314	Vamp1
ENSMUSG00000083027	0.799319	0.288576	2.76987	0.00560786	0.0794086	Gm13140
ENSMUSG00000019146	0.444822	0.160637	2.76912	0.00562076	0.0794936	Cacng2
ENSMUSG00000024975	0.497999	0.179848	2.769	0.0056229	0.0794936	Pdcd4
ENSMUSG00000005882	-0.277587	0.100344	-2.76634	0.00566885	0.0796721	Uqcc
ENSMUSG00000038759	-0.286032	0.103362	-2.76729	0.00565251	0.0796721	Nup205
ENSMUSG00000043140	-0.510921	0.184671	-2.76665	0.00566357	0.0796721	Tmem186
ENSMUSG00000048327	-1.09601	0.396195	-2.76634	0.005669	0.0796721	Ckap2l
ENSMUSG00000050240	0.455238	0.164573	2.76618	0.00567177	0.0796721	Hic2
ENSMUSG00000053560	0.957221	0.346038	2.76623	0.00567088	0.0796721	Ier2
ENSMUSG00000059000	-0.461807	0.166876	-2.76737	0.00565104	0.0796721	Zfp799
ENSMUSG00000084931	-1.37561	0.49719	-2.76677	0.00566149	0.0796721	1110019D14Rik
ENSMUSG00000034501	0.272944	0.0986847	2.76581	0.00567808	0.0796971	1810048J11Rik
ENSMUSG00000022377	-0.454349	0.164361	-2.76433	0.00570394	0.0799325	Asap1
ENSMUSG00000084408	-1.43663	0.519675	-2.76449	0.00570122	0.0799325	Gm11870
ENSMUSG00000027569	0.432706	0.156578	2.76352	0.00571814	0.0800465	1600027N09Rik
ENSMUSG00000056972	0.644409	0.233199	2.76335	0.00572118	0.0800465	Magel2
ENSMUSG00000020128	-0.380117	0.137587	-2.76275	0.00573171	0.08013	Vps54
ENSMUSG00000002129	-0.341747	0.123731	-2.76201	0.00574469	0.0802477	Sf3a1
ENSMUSG00000092038	-1.9157	0.694259	-2.75935	0.00579164	0.0808394	Gm17369
ENSMUSG00000045176	0.571489	0.207234	2.7577	0.00582097	0.0810346	2310047M10Rik
ENSMUSG00000048138	-1.39591	0.506218	-2.75753	0.00582406	0.0810346	Dmrt2
ENSMUSG00000079386	-0.818065	0.296664	-2.75755	0.00582367	0.0810346	Gm3173
ENSMUSG00000093109	2.28538	0.828632	2.75802	0.00581533	0.0810346
ENSMUSG00000043998	0.446248	0.161914	2.75608	0.00584991	0.08133	Mgat2
ENSMUSG00000057228	-1.11275	0.40384	-2.75541	0.00586189	0.0814321	Aadat
ENSMUSG00000031367	-0.835553	0.303331	-2.75459	0.0058765	0.0815053	Ap1s2
ENSMUSG00000034336	0.355877	0.129186	2.75476	0.00587358	0.0815053	Ina
ENSMUSG00000081480	-1.45812	0.52939	-2.75434	0.00588106	0.0815053	Gm13608
ENSMUSG00000028795	0.413417	0.150122	2.75387	0.00588954	0.0815586	Ccdc28b
ENSMUSG00000018427	-0.727607	0.264334	-2.7526	0.00591233	0.0818097	Ypel2
ENSMUSG00000040877	0.447636	0.16266	2.75197	0.00592377	0.0818393	Wdr25
ENSMUSG00000042388	-0.313473	0.113906	-2.75204	0.00592257	0.0818393	Dlgap3
ENSMUSG00000056328	-2.14469	0.779853	-2.75012	0.0059574	0.0822392	Myh1
ENSMUSG00000024588	0.257879	0.0938111	2.74892	0.00597924	0.0824114	Fech
ENSMUSG00000040653	-0.331995	0.120762	-2.74916	0.00597478	0.0824114	Ppp1r14c
ENSMUSG00000075229	-0.630765	0.229665	-2.74646	0.00602431	0.0829675	Ccdc58
ENSMUSG00000038816	0.721351	0.26269	2.74602	0.00603234	0.0829784	Ctnnal1
ENSMUSG00000047881	-0.590313	0.21498	-2.7459	0.00603453	0.0829784	Rell1
ENSMUSG00000028671	0.512862	0.186824	2.74517	0.00604804	0.0830991	Gale
ENSMUSG00000055150	-0.953584	0.347447	-2.74455	0.0060594	0.0831902	Zfp78
ENSMUSG00000088632	0.982651	0.358109	2.744	0.00606957	0.0832648
ENSMUSG00000005968	0.83577	0.304993	2.74029	0.00613852	0.0840592	Tuft1
ENSMUSG00000028076	1.1255	0.410748	2.74011	0.00614181	0.0840592	Cd1d1
ENSMUSG00000034006	0.539521	0.196861	2.74062	0.00613232	0.0840592	Pqlc1
ENSMUSG00000001891	-0.452198	0.165086	-2.73916	0.00615964	0.0841068	Ugp2
ENSMUSG00000024548	-0.418839	0.152894	-2.73941	0.00615496	0.0841068	Setbp1
ENSMUSG00000078937	1.41069	0.514997	2.73921	0.00615872	0.0841068	Cpt1b
ENSMUSG00000042292	-0.531867	0.194293	-2.73744	0.00619192	0.084481	Mkl1
ENSMUSG00000062561	-1.0801	0.394603	-2.73719	0.00619665	0.084481	Gm10118
ENSMUSG00000018143	0.471043	0.172264	2.73442	0.00624911	0.0851301	Mafk
ENSMUSG00000012705	0.802713	0.293656	2.73351	0.00626634	0.0852988	Retn
ENSMUSG00000004394	0.256945	0.0940171	2.73296	0.00627685	0.0853099	Tmed4
ENSMUSG00000068221	0.465715	0.170392	2.73319	0.00627242	0.0853099	Pdxp
ENSMUSG00000034771	0.382945	0.140138	2.73263	0.00628299	0.0853274	Tle2
ENSMUSG00000027332	0.379044	0.138807	2.73073	0.00631942	0.085756	Ivd
ENSMUSG00000020844	0.547386	0.200513	2.72992	0.0063349	0.0858996	Nxn
ENSMUSG00000086155	0.725424	0.265842	2.72878	0.00635694	0.0861321	9430041J12Rik
ENSMUSG00000019997	-0.706803	0.25918	-2.72707	0.00638995	0.0865128	Ctgf
ENSMUSG00000042680	-0.407116	0.149346	-2.72599	0.00641089	0.0867101	Fam59a
ENSMUSG00000047777	0.426803	0.156578	2.72581	0.00641439	0.0867101	Phf13
ENSMUSG00000063430	-0.55003	0.20186	-2.72481	0.00643388	0.0869068	Wscd2
ENSMUSG00000021009	-0.817025	0.299953	-2.72385	0.00645266	0.0869433	Ptpn21
ENSMUSG00000027424	-0.791022	0.290418	-2.72374	0.0064548	0.0869433	8430406I07Rik
ENSMUSG00000035172	0.859719	0.315572	2.72432	0.00644348	0.0869433	Plekhh3
ENSMUSG00000056069	0.524705	0.192647	2.72366	0.00645636	0.0869433	Fam105a
ENSMUSG00000019734	0.80451	0.295567	2.72193	0.00649027	0.0869864	Tmc4
ENSMUSG00000023032	0.360513	0.132398	2.72294	0.00647036	0.0869864	Slc4a8
ENSMUSG00000034189	0.348966	0.128148	2.72315	0.00646618	0.0869864	Hsdl1
ENSMUSG00000042997	-0.312965	0.114958	-2.72243	0.00648044	0.0869864	Nhlrc3
ENSMUSG00000043496	-1.19426	0.438746	-2.72198	0.00648924	0.0869864	Tril
ENSMUSG00000045092	-1.23533	0.453877	-2.72173	0.00649418	0.0869864	S1pr1
ENSMUSG00000051343	0.275127	0.101083	2.7218	0.00649275	0.0869864	Rab11fip5
ENSMUSG00000067235	1.06112	0.390164	2.71968	0.00653442	0.0874004	H2-Q10
ENSMUSG00000082420	-1.72029	0.632539	-2.71965	0.00653503	0.0874004	Gm6517
ENSMUSG00000037846	-0.798915	0.294171	-2.71581	0.00661129	0.0883531	Rtkn2
ENSMUSG00000016128	-0.904713	0.333169	-2.71548	0.00661805	0.0883764	Stard13
ENSMUSG00000043090	-0.446754	0.164574	-2.71461	0.00663529	0.0885394	Zfp866
ENSMUSG00000052446	-0.810969	0.298828	-2.71383	0.00665102	0.0886685	Zfp961
ENSMUSG00000053684	-0.669444	0.246697	-2.71363	0.00665506	0.0886685	BC048403
ENSMUSG00000027276	-1.17219	0.432443	-2.71062	0.00671579	0.0891908	Jag1
ENSMUSG00000037362	-0.579912	0.213889	-2.71128	0.00670248	0.0891908	Nov
ENSMUSG00000037973	1.2035	0.443954	2.71086	0.0067108	0.0891908	Ccdc129
ENSMUSG00000061079	-0.76733	0.283103	-2.71043	0.00671961	0.0891908	Zfp143
ENSMUSG00000078317	0.366972	0.135381	2.71066	0.00671488	0.0891908	F8a
ENSMUSG00000052397	-0.885218	0.326627	-2.71018	0.00672474	0.0891916	Ezr
ENSMUSG00000021127	-1.16054	0.428394	-2.70905	0.00674771	0.0893614	Zfp36l1
ENSMUSG00000051166	-0.608443	0.224592	-2.7091	0.0067466	0.0893614	Eml5
ENSMUSG00000025608	-0.683296	0.252282	-2.70847	0.00675949	0.0894501	Podxl
ENSMUSG00000022536	0.197703	0.0730247	2.70734	0.00678249	0.0894851	Glyr1
ENSMUSG00000025555	-0.232039	0.0857043	-2.70743	0.00678059	0.0894851	Farp1
ENSMUSG00000026455	0.412834	0.152446	2.70807	0.00676761	0.0894851	Klhl12
ENSMUSG00000032479	0.293355	0.108355	2.70734	0.00678247	0.0894851	Mtap4
ENSMUSG00000027253	-0.70417	0.260175	-2.70653	0.00679914	0.0896375	Lrp4
ENSMUSG00000010044	0.54987	0.203232	2.70563	0.00681753	0.0898127	Zmynd10
ENSMUSG00000029474	0.232656	0.0860252	2.70451	0.00684042	0.0900467	Rnf34
ENSMUSG00000028794	0.83451	0.308704	2.70327	0.00686607	0.0901819	A3galt2
ENSMUSG00000091208	-0.570964	0.211204	-2.70338	0.00686388	0.0901819	Gm3494
ENSMUSG00000091737	1.43035	0.529045	2.70364	0.00685848	0.0901819	Gm17543
ENSMUSG00000023764	-0.657826	0.243383	-2.70284	0.00687503	0.0902322	Sfi1
ENSMUSG00000022214	0.295619	0.109397	2.70227	0.00688676	0.0903188	Dcaf11
ENSMUSG00000035632	-0.409876	0.151817	-2.6998	0.00693817	0.0909252	Cnot3
ENSMUSG00000025995	-0.233472	0.0865176	-2.69855	0.00696419	0.0911674	Wdr75
ENSMUSG00000092035	0.748695	0.277457	2.69842	0.00696702	0.0911674	Peg10
ENSMUSG00000020577	0.259739	0.0962708	2.698	0.0069757	0.0912131	Tspan13
ENSMUSG00000027953	0.680097	0.252126	2.69745	0.00698735	0.0912975	Slc50a1
ENSMUSG00000089762	-1.18903	0.440858	-2.69708	0.0069951	0.091331	Ier5l
ENSMUSG00000039463	-0.411291	0.152526	-2.69653	0.0070066	0.0914132	Slc9a8
ENSMUSG00000036473	0.249697	0.0926793	2.6942	0.00705571	0.0919293	Tbc1d24
ENSMUSG00000062380	0.357834	0.132818	2.69416	0.00705661	0.0919293	Tubb3
ENSMUSG00000049892	-1.76075	0.653683	-2.69358	0.00706891	0.0920214	Rasd1
ENSMUSG00000070871	0.427873	0.158886	2.69295	0.00708229	0.0921274	Ccnyl1
ENSMUSG00000014039	-0.495762	0.184129	-2.69247	0.00709259	0.0921931	Prdm15
ENSMUSG00000025645	-0.880615	0.32719	-2.69145	0.00711427	0.0923385	Ccdc51
ENSMUSG00000026383	0.371543	0.138043	2.69151	0.00711294	0.0923385	Epb4.1l5
ENSMUSG00000034120	0.482836	0.179496	2.68996	0.00714614	0.0926171	Srsf2
ENSMUSG00000073678	-0.481498	0.178999	-2.68995	0.00714627	0.0926171	Pgap1
ENSMUSG00000024251	-0.374138	0.139195	-2.68787	0.00719092	0.0931271	Thada
ENSMUSG00000016831	0.260294	0.0968531	2.68752	0.00719853	0.0931572	Tox4
ENSMUSG00000022848	0.351546	0.130842	2.6868	0.00721402	0.093289	Dirc2
ENSMUSG00000020052	0.87058	0.324071	2.68639	0.00722296	0.0933303	Ascl1
ENSMUSG00000020705	0.251413	0.0936114	2.68571	0.00723752	0.0933303	Ddx42
ENSMUSG00000056763	-0.515125	0.191805	-2.68567	0.00723845	0.0933303	Cspp1
ENSMUSG00000093561	-1.20986	0.450477	-2.68574	0.0072369	0.0933303
ENSMUSG00000020132	0.233124	0.0868147	2.68531	0.00724635	0.0933638	Rab21
ENSMUSG00000067144	1.32249	0.492553	2.68498	0.00725339	0.093386	Slc22a7
ENSMUSG00000059288	-0.571841	0.213103	-2.6834	0.00728772	0.0937594	Cdyl
ENSMUSG00000021928	0.45918	0.171171	2.68258	0.00730571	0.0939221	Ebpl
ENSMUSG00000038178	0.523748	0.19537	2.6808	0.00734457	0.0943138	Slc43a2
ENSMUSG00000055691	-0.987905	0.368525	-2.6807	0.0073469	0.0943138	Gja6
ENSMUSG00000002222	0.336829	0.125677	2.68012	0.00735951	0.094338	Rmnd5a
ENSMUSG00000086949	3.50584	1.30806	2.68018	0.00735832	0.094338	Gm13066
ENSMUSG00000042354	-0.2824	0.105388	-2.67963	0.00737043	0.0944091	Gnl3
ENSMUSG00000052534	-0.441031	0.164625	-2.679	0.00738422	0.0944837	Pbx1
ENSMUSG00000062074	1.86726	0.697031	2.67888	0.00738699	0.0944837	Wisp3
ENSMUSG00000083623	0.715745	0.267425	2.67643	0.00744106	0.095106	Gm7224
ENSMUSG00000058900	-1.48839	0.556729	-2.67346	0.00750726	0.0958825	Rsl1
ENSMUSG00000020973	0.442371	0.165515	2.6727	0.00752436	0.0960311	1110034A24Rik
ENSMUSG00000026675	0.920168	0.344599	2.67026	0.00757929	0.096662	Hsd17b7
ENSMUSG00000040713	0.425137	0.159234	2.66988	0.0075878	0.096663	Creg1
ENSMUSG00000047710	-0.255815	0.095819	-2.66977	0.00759035	0.096663	Zfp828
ENSMUSG00000032507	-0.202737	0.0759478	-2.66943	0.00759801	0.0966904	Fbxl2
ENSMUSG00000006219	0.952524	0.356921	2.66872	0.00761402	0.0968242	Fblim1
ENSMUSG00000000253	0.346101	0.129709	2.66829	0.00762381	0.0968318	Gmpr
ENSMUSG00000075538	-0.977241	0.366253	-2.66821	0.00762564	0.0968318	Gm10855
ENSMUSG00000034037	0.584794	0.219299	2.66665	0.00766119	0.0972131	Fgd5
ENSMUSG00000049539	0.901024	0.337963	2.66604	0.00767495	0.0973175	Hist1h1a
ENSMUSG00000026274	-0.728722	0.27339	-2.66551	0.00768723	0.0974029	Pask
ENSMUSG00000075272	-1.01014	0.379157	-2.66417	0.00771782	0.0977202	Ttc30a2
ENSMUSG00000022799	-0.590527	0.22174	-2.66315	0.00774133	0.0978768	Arhgap31
ENSMUSG00000041272	-0.67025	0.25166	-2.66332	0.00773734	0.0978768	Tox
ENSMUSG00000057715	-0.583431	0.219103	-2.66281	0.00774905	0.0979042	A830018L16Rik
ENSMUSG00000086568	-1.11043	0.4171	-2.66226	0.00776186	0.0979956	9130020K20Rik
ENSMUSG00000027459	0.63241	0.237627	2.66135	0.00778269	0.0981881	Fam110a
ENSMUSG00000030970	-0.346521	0.130372	-2.65794	0.00786205	0.0991082	Ctbp2
ENSMUSG00000090430	-0.596067	0.224277	-2.65773	0.00786689	0.0991082	Snhg4
ENSMUSG00000027078	-0.580739	0.218529	-2.65749	0.00787256	0.0991086	Ube2l6
ENSMUSG00000025931	-0.4628	0.174171	-2.65716	0.00788016	0.0991334	Paqr8
ENSMUSG00000039050	0.257276	0.0968598	2.65617	0.00790346	0.0993554	Osbpl2
ENSMUSG00000031659	0.584799	0.220266	2.65497	0.00793154	0.0996371	Adcy7
ENSMUSG00000000325	0.31348	0.118149	2.65327	0.00797172	0.099664	Arvcf
ENSMUSG00000018593	-0.802301	0.3025	-2.65224	0.00799602	0.099664	Sparc
ENSMUSG00000020884	1.06986	0.403316	2.65266	0.00798613	0.099664	Asgr1
ENSMUSG00000021090	0.828518	0.312329	2.65271	0.00798489	0.099664	Lrrc9
ENSMUSG00000024273	-0.519585	0.195853	-2.65294	0.00797944	0.099664	2700062C07Rik
ENSMUSG00000030846	-0.491915	0.185445	-2.65261	0.00798712	0.099664	Tial1
ENSMUSG00000031987	-0.292179	0.11015	-2.65254	0.00798878	0.099664	Egln1
ENSMUSG00000042249	-0.481868	0.18166	-2.65258	0.00798783	0.099664	Adrbk2
ENSMUSG00000044794	0.52622	0.198401	2.6523	0.00799447	0.099664	9330133O14Rik
ENSMUSG00000068740	0.271776	0.102393	2.65426	0.00794827	0.099664	Celsr2
ENSMUSG00000092023	-0.765817	0.288504	-2.65444	0.00794398	0.099664	Gm17496
ENSMUSG00000046613	0.51011	0.192386	2.65149	0.0080138	0.099815	Vwa5b2
ENSMUSG00000068551	0.449207	0.169493	2.65029	0.00804215	0.100097	Zfp467
ENSMUSG00000073293	0.342136	0.129136	2.64942	0.00806305	0.100286	Nudt10
ENSMUSG00000073293	0.342136	0.129136	2.64942	0.00806305	0.100286	Nudt10
ENSMUSG00000032840	0.349092	0.131826	2.64813	0.00809392	0.100599	2410131K14Rik
ENSMUSG00000036466	-0.854903	0.322876	-2.64778	0.00810229	0.100632	Megf11
ENSMUSG00000028173	-1.37767	0.520397	-2.64734	0.00811279	0.100691	Wls
ENSMUSG00000030209	-0.272051	0.102799	-2.64643	0.00813467	0.100892	Grin2b
ENSMUSG00000022108	0.181463	0.0686109	2.64481	0.00817372	0.101233	Itm2b
ENSMUSG00000066357	0.462818	0.174985	2.6449	0.00817143	0.101233	Wdr6
ENSMUSG00000040462	0.202489	0.076596	2.64359	0.00820308	0.101525	Os9
ENSMUSG00000033257	-0.346458	0.1311	-2.64269	0.00822492	0.101724	Ttll4
ENSMUSG00000036611	-1.02056	0.386403	-2.64118	0.00826173	0.102108	Eepd1
ENSMUSG00000027495	0.630608	0.238812	2.64061	0.00827578	0.102209	2010011I20Rik
ENSMUSG00000048769	0.687795	0.260499	2.6403	0.00828333	0.102231	H1f0
ENSMUSG00000037885	-0.227572	0.0862566	-2.63832	0.00833184	0.102757	Stk35
ENSMUSG00000025959	0.540972	0.205113	2.63744	0.00835347	0.10288	Klf7
ENSMUSG00000043635	-0.741266	0.281033	-2.63765	0.00834838	0.10288	Adamts3
ENSMUSG00000043448	0.867841	0.329142	2.63667	0.00837231	0.10304	Gjc2
ENSMUSG00000039828	-0.30214	0.11468	-2.63465	0.00842247	0.10344	Wdr70
ENSMUSG00000043572	-0.707895	0.268682	-2.63469	0.00842138	0.10344	Pars2
ENSMUSG00000090641	-0.819383	0.310976	-2.63487	0.00841684	0.10344	Zfp712
ENSMUSG00000030168	0.363851	0.138152	2.6337	0.0084461	0.103658	Adipor2
ENSMUSG00000035578	0.618443	0.234847	2.63338	0.00845386	0.103681	Iqcg
ENSMUSG00000083192	-0.772646	0.293467	-2.63281	0.00846805	0.103782	Gm7689
ENSMUSG00000037492	-0.981496	0.37283	-2.63256	0.00847442	0.103788	Zmat4
ENSMUSG00000039716	-0.295804	0.112401	-2.63168	0.00849635	0.103984	Dock3
ENSMUSG00000072844	-1.30931	0.49762	-2.63114	0.00850978	0.104076	G530011O06Rik
ENSMUSG00000072915	-0.626677	0.238411	-2.62856	0.00857484	0.104799	Gm12258
ENSMUSG00000045294	0.689165	0.262495	2.62544	0.0086537	0.105689	Insig1
ENSMUSG00000051159	-1.15398	0.439688	-2.62455	0.00867629	0.105892	Cited1
ENSMUSG00000023971	-0.477926	0.182118	-2.62427	0.00868354	0.105907	Rrp36
ENSMUSG00000028383	0.472441	0.18008	2.6235	0.00870304	0.106071	Hsdl2
ENSMUSG00000070284	0.725067	0.276522	2.62209	0.00873915	0.106437	Gmppb
ENSMUSG00000015016	-0.364165	0.138926	-2.62128	0.00875991	0.106616	Acsf3
ENSMUSG00000074749	0.622953	0.237719	2.62054	0.00877899	0.106775	Plk1s1
ENSMUSG00000037640	-0.428548	0.163558	-2.62015	0.008789	0.106823	Zfp60
ENSMUSG00000021958	-0.437571	0.167037	-2.6196	0.00880329	0.106922	Pinx1
ENSMUSG00000036162	3.00529	1.14814	2.61753	0.00885682	0.107498	1700066J24Rik
ENSMUSG00000018932	0.5055	0.193166	2.61692	0.0088727	0.107543	Map2k3
ENSMUSG00000039065	0.45903	0.175402	2.61701	0.0088703	0.107543	Fam173b
ENSMUSG00000038214	0.358832	0.137251	2.61442	0.00893799	0.108259	Bend3
ENSMUSG00000007033	0.96831	0.370568	2.61304	0.00897404	0.108472	Hspa1l
ENSMUSG00000026271	0.825737	0.315991	2.61317	0.00897075	0.108472	Gpr35
ENSMUSG00000071636	0.471428	0.180399	2.61324	0.00896875	0.108472	Rimbp3
ENSMUSG00000019810	0.510629	0.195445	2.61265	0.00898421	0.10852	Fuca2
ENSMUSG00000054944	0.961897	0.368236	2.61218	0.00899676	0.108597	5330416C01Rik
ENSMUSG00000026707	0.357161	0.136792	2.61099	0.00902816	0.108752	Nsun6
ENSMUSG00000038112	0.866144	0.331716	2.61111	0.00902501	0.108752	AW551984
ENSMUSG00000050002	0.427427	0.163675	2.61144	0.00901617	0.108752	5133401N09Rik
ENSMUSG00000086651	-0.545801	0.209069	-2.61062	0.00903786	0.108795	1300002E11Rik
ENSMUSG00000003208	-0.535441	0.205243	-2.60882	0.00908556	0.109294	Ccdc94
ENSMUSG00000052684	0.703018	0.269568	2.60794	0.00910889	0.1095	Jun
ENSMUSG00000029455	0.379758	0.145634	2.60762	0.0091173	0.109526	Aldh2
ENSMUSG00000079037	0.545228	0.209112	2.60735	0.00912451	0.109538	Prnp
ENSMUSG00000003033	-0.284146	0.109003	-2.60677	0.00914	0.109649	Ap1m1
ENSMUSG00000078160	-1.33844	0.513966	-2.60415	0.00921029	0.110417	Gm16503
ENSMUSG00000022043	0.341851	0.131326	2.60307	0.00923934	0.11069	Trim35
ENSMUSG00000052364	0.28637	0.110031	2.60262	0.00925153	0.11076	B630019K06Rik
ENSMUSG00000002963	0.587184	0.225678	2.60187	0.00927173	0.110926	Pnkp
ENSMUSG00000070576	-0.357537	0.13751	-2.60009	0.00931995	0.111428	Mn1
ENSMUSG00000041423	1.2707	0.489063	2.59823	0.00937064	0.111881	Paqr6
ENSMUSG00000052713	0.604949	0.232821	2.59834	0.00936758	0.111881	Zfp608
ENSMUSG00000034591	0.409401	0.157611	2.59753	0.00938958	0.112032	Slc41a2
ENSMUSG00000010803	-0.492955	0.189806	-2.59716	0.00939993	0.112079	Gabra1
ENSMUSG00000006356	-0.291021	0.1121	-2.59609	0.00942907	0.11235	Crip2
ENSMUSG00000079507	0.688093	0.265347	2.59318	0.00950942	0.113231	H2-Q1
ENSMUSG00000044469	0.549023	0.211758	2.59269	0.0095228	0.113314	Tnfaip8l1
ENSMUSG00000001763	0.448893	0.173167	2.59225	0.00953496	0.113382	Tspan33
ENSMUSG00000031955	0.36683	0.141599	2.59062	0.00958032	0.113767	Bcar1
ENSMUSG00000085264	1.13266	0.43721	2.59064	0.00957963	0.113767	Gm15581
ENSMUSG00000029851	-1.36422	0.526747	-2.58989	0.00960076	0.113933	Fam115c
ENSMUSG00000071616	-0.564243	0.217983	-2.58847	0.00964033	0.114325	Gm3488
ENSMUSG00000005360	-0.760988	0.294048	-2.58797	0.0096543	0.114337	Slc1a3
ENSMUSG00000090435	-0.732897	0.283171	-2.58818	0.00964849	0.114337	Gm6410
ENSMUSG00000051329	-0.311204	0.120273	-2.58748	0.00966819	0.114424	Nup160
ENSMUSG00000037007	-0.527758	0.20405	-2.58642	0.00969783	0.114604	Zfp113
ENSMUSG00000050830	-1.31203	0.507278	-2.58641	0.00969814	0.114604	Vwc2
ENSMUSG00000078185	-0.463114	0.179068	-2.58624	0.00970289	0.114604	Chml
ENSMUSG00000004359	-1.07897	0.41725	-2.5859	0.00971242	0.114639	Spic
ENSMUSG00000058661	-0.740848	0.286559	-2.58532	0.00972886	0.114756	Gm7452
ENSMUSG00000021575	-1.0084	0.390096	-2.58501	0.00973749	0.114763	Ahrr
ENSMUSG00000057254	-0.665118	0.257315	-2.58484	0.00974249	0.114763	Zfp870
ENSMUSG00000032878	-0.3639	0.140808	-2.58438	0.00975541	0.114792	Ccdc85a
ENSMUSG00000042473	-1.45409	0.562666	-2.58429	0.00975801	0.114792	Tbc1d8b
ENSMUSG00000048027	-0.279728	0.108279	-2.58342	0.00978273	0.114929	Rgmb
ENSMUSG00000073209	-1.78078	0.689313	-2.58342	0.00978271	0.114929	Klf14
ENSMUSG00000064284	0.57211	0.221538	2.58245	0.00981026	0.115176	2210021J22Rik
ENSMUSG00000021236	0.338402	0.131066	2.58192	0.00982521	0.115274	Entpd5
ENSMUSG00000054165	1.4486	0.561198	2.58127	0.00984366	0.115414	4922502B01Rik
ENSMUSG00000081792	-0.546408	0.211774	-2.58015	0.0098758	0.115713	Anp32b-ps1
ENSMUSG00000003809	0.382805	0.148459	2.57852	0.00992256	0.115863	Gcdh
ENSMUSG00000019814	-0.32776	0.127082	-2.57913	0.0099049	0.115863	Ltv1
ENSMUSG00000025138	0.433741	0.168202	2.57869	0.00991765	0.115863	Sirt7
ENSMUSG00000027895	0.464107	0.179957	2.57899	0.00990892	0.115863	Kcnc4
ENSMUSG00000030235	-1.04587	0.405639	-2.57832	0.00992807	0.115863	Slco1c1
ENSMUSG00000078114	-1.08216	0.419581	-2.57914	0.00990456	0.115863	Gm16496
ENSMUSG00000033453	-0.894038	0.346917	-2.5771	0.00996342	0.116198	Adamts15
ENSMUSG00000031386	-0.339853	0.131911	-2.57637	0.00998426	0.116364	Hcfc1
ENSMUSG00000058498	0.852137	0.330936	2.57493	0.0100259	0.116772	Rnf207
ENSMUSG00000054659	-0.900388	0.349776	-2.57418	0.0100477	0.116948	Pm20d2
ENSMUSG00000067438	0.758409	0.294712	2.57339	0.0100709	0.117141	Hmx1
ENSMUSG00000015653	0.603136	0.234472	2.57232	0.010102	0.117425	Steap2
ENSMUSG00000036180	-0.313296	0.121837	-2.57142	0.0101282	0.117652	Gatad2a
ENSMUSG00000001288	-0.852324	0.331524	-2.57093	0.0101427	0.117665	Rarg
ENSMUSG00000055447	-0.383485	0.149152	-2.5711	0.0101375	0.117665	Cd47
ENSMUSG00000032898	0.251391	0.0978029	2.57038	0.0101587	0.1177	Fbxo21
ENSMUSG00000050822	-0.299645	0.116577	-2.57036	0.0101591	0.1177	Slc29a4
ENSMUSG00000031292	-0.578352	0.22524	-2.56771	0.0102373	0.118308	Cdkl5
ENSMUSG00000038545	0.436805	0.170093	2.56803	0.0102277	0.118308	Cul7
ENSMUSG00000038888	-0.55426	0.21581	-2.56828	0.0102204	0.118308	Ctu1
ENSMUSG00000060012	-0.514917	0.200539	-2.56767	0.0102385	0.118308	Kif13b
ENSMUSG00000032788	0.25689	0.100093	2.5665	0.0102729	0.118628	Pdxk
ENSMUSG00000014245	0.436215	0.169992	2.5661	0.0102849	0.118688	Pigl
ENSMUSG00000031561	-0.305362	0.11901	-2.56584	0.0102925	0.118698	Odz3
ENSMUSG00000039629	-0.856745	0.333934	-2.56562	0.0102993	0.118698	Fam40b
ENSMUSG00000019301	1.86416	0.726815	2.56484	0.0103223	0.118808	Hsd17b1
ENSMUSG00000032320	0.255045	0.099431	2.56504	0.0103164	0.118808	Rcn2
ENSMUSG00000069456	1.02296	0.398977	2.56397	0.0103483	0.119029	Rdh16
ENSMUSG00000058331	-0.783787	0.305727	-2.56368	0.0103569	0.11905	Zfp85-rs1
ENSMUSG00000041623	-0.394089	0.153764	-2.56294	0.010379	0.119226	D11Wsu47e
ENSMUSG00000024104	0.32535	0.126971	2.5624	0.0103952	0.119334	D6Wsu116e
ENSMUSG00000022951	0.475342	0.18557	2.56153	0.0104213	0.119556	Rcan1
ENSMUSG00000025962	-0.394165	0.153933	-2.56062	0.0104486	0.119791	Fastkd2
ENSMUSG00000022995	-0.372498	0.1455	-2.56013	0.0104632	0.119881	Enah
ENSMUSG00000028194	-0.350564	0.136971	-2.55941	0.010485	0.120052	Ddah1
ENSMUSG00000039908	0.697078	0.272422	2.55882	0.0105028	0.120154	Slc26a11
ENSMUSG00000079562	0.253062	0.098904	2.55866	0.0105076	0.120154	Maea
ENSMUSG00000035164	-0.655826	0.256472	-2.55711	0.0105547	0.120458	Zc3h12c
ENSMUSG00000044513	0.625982	0.244776	2.55736	0.0105469	0.120458	9930014A18Rik
ENSMUSG00000045672	-1.10513	0.432158	-2.55724	0.0105507	0.120458	Col27a1
ENSMUSG00000004698	-0.71276	0.278878	-2.55582	0.0105938	0.120513	Hdac9
ENSMUSG00000004698	-0.71276	0.278878	-2.55582	0.0105938	0.120513	Hdac9
ENSMUSG00000030124	1.14766	0.448919	2.5565	0.010573	0.120513	Lag3
ENSMUSG00000053158	1.17394	0.459247	2.55623	0.0105815	0.120513	Fes
ENSMUSG00000058446	0.563443	0.220404	2.55641	0.0105757	0.120513	Znrf2
ENSMUSG00000073423	-0.337493	0.132045	-2.55588	0.0105918	0.120513	Zfp414
ENSMUSG00000046603	-0.615631	0.240946	-2.55506	0.010617	0.120699	D9Ertd402e
ENSMUSG00000031812	0.271816	0.106446	2.55357	0.0106625	0.1211	Map1lc3b
ENSMUSG00000049739	-0.366825	0.143659	-2.55345	0.010666	0.1211	Zfp646
ENSMUSG00000034595	0.668127	0.261693	2.5531	0.010677	0.121146	Ppp1r18
ENSMUSG00000044816	0.667755	0.261577	2.5528	0.010686	0.12117	D630023F18Rik
ENSMUSG00000032478	-0.450073	0.17643	-2.55101	0.0107412	0.121717	Nme6
ENSMUSG00000025909	-0.474251	0.185984	-2.54995	0.0107737	0.122007	Sntg1
ENSMUSG00000091379	-1.68061	0.659344	-2.54891	0.010806	0.122294	Gm3159
ENSMUSG00000086095	-0.79076	0.310332	-2.54811	0.0108308	0.122496	Gm15328
ENSMUSG00000039568	0.502252	0.197181	2.54716	0.0108602	0.12275	Fam100a
ENSMUSG00000092056	1.81715	0.713897	2.54539	0.0109155	0.123295	Gm7289
ENSMUSG00000020484	0.287699	0.113061	2.54463	0.0109392	0.123405	Xbp1
ENSMUSG00000087370	0.332163	0.130524	2.54484	0.0109328	0.123405	Tmem170b
ENSMUSG00000026563	-0.317059	0.124629	-2.54402	0.0109584	0.123541	Tada1
ENSMUSG00000087267	-0.730089	0.287029	-2.54361	0.0109715	0.12361	4933427J07Rik
ENSMUSG00000063531	-0.991116	0.389791	-2.54268	0.0110005	0.123857	Sema3e
ENSMUSG00000000276	0.288012	0.113283	2.54241	0.0110091	0.123876	Dgke
ENSMUSG00000029778	0.373544	0.147045	2.54033	0.0110748	0.124507	Adcyap1r1
ENSMUSG00000060579	0.660122	0.259886	2.54004	0.0110838	0.124507	Fhit
ENSMUSG00000073478	-0.9807	0.386108	-2.53996	0.0110865	0.124507	D730003I15Rik
ENSMUSG00000026494	-0.377799	0.148759	-2.53966	0.0110959	0.124533	Kif26b
ENSMUSG00000021125	0.511805	0.201623	2.53843	0.011135	0.124893	Arg2
ENSMUSG00000091822	-0.960191	0.378359	-2.53778	0.011156	0.125048	Gm17502
ENSMUSG00000020328	-0.431221	0.16998	-2.53689	0.0111841	0.125284	Nudcd2
ENSMUSG00000020747	-0.533689	0.210411	-2.53642	0.0111993	0.12531	2310067B10Rik
ENSMUSG00000034403	0.294392	0.116068	2.53637	0.0112008	0.12531	Pja1
ENSMUSG00000028780	-0.637925	0.251542	-2.53605	0.011211	0.125346	Sema3c
ENSMUSG00000026799	-0.30458	0.120126	-2.5355	0.0112287	0.125384	Med27
ENSMUSG00000082315	-1.37564	0.542532	-2.53559	0.0112259	0.125384	Gm16523
ENSMUSG00000047193	0.201264	0.0794235	2.53406	0.0112751	0.125766	Dync2h1
ENSMUSG00000061666	0.214104	0.0844928	2.53399	0.0112773	0.125766	Gdpd1
ENSMUSG00000025810	-0.602615	0.238101	-2.53092	0.0113764	0.126791	Nrp1
ENSMUSG00000022307	-0.459975	0.181789	-2.53027	0.0113975	0.126946	Oxr1
ENSMUSG00000081692	-1.3683	0.540948	-2.52944	0.0114244	0.127165	Gm15971
ENSMUSG00000091395	-0.843249	0.333472	-2.5287	0.0114487	0.127331	Gm6297
ENSMUSG00000092546	-0.802189	0.317254	-2.52854	0.0114538	0.127331	Gm20439
ENSMUSG00000075334	-0.625232	0.247306	-2.52817	0.011466	0.127386	Rprm
ENSMUSG00000078436	-0.640723	0.253487	-2.52763	0.0114835	0.1275	Gm4767
ENSMUSG00000000532	0.30463	0.120595	2.52605	0.0115353	0.127987	Acvr1b
ENSMUSG00000001156	-0.455296	0.180261	-2.52575	0.011545	0.127987	Mxd1
ENSMUSG00000079444	0.513164	0.203183	2.52563	0.0115491	0.127987	Prickle4
ENSMUSG00000027962	-0.790722	0.313137	-2.52516	0.0115644	0.127994	Vcam1
ENSMUSG00000060862	-0.557094	0.220613	-2.52521	0.0115628	0.127994	Zbtb40
ENSMUSG00000024338	1.08296	0.429564	2.52106	0.0117003	0.128287	Psmb8
ENSMUSG00000024521	0.833906	0.330751	2.52125	0.0116938	0.128287	Pmaip1
ENSMUSG00000025733	0.580729	0.230311	2.5215	0.0116855	0.128287	Rhot2
ENSMUSG00000027593	0.34445	0.136507	2.52331	0.0116255	0.128287	Raly
ENSMUSG00000027593	0.34445	0.136507	2.52331	0.0116255	0.128287	C130057N11Rik
ENSMUSG00000029587	-0.308731	0.122332	-2.52372	0.0116122	0.128287	Zfp12
ENSMUSG00000032422	0.330241	0.130942	2.52204	0.0116678	0.128287	Snx14
ENSMUSG00000035606	0.671951	0.266304	2.52325	0.0116277	0.128287	Ky
ENSMUSG00000037773	-0.259046	0.102741	-2.52134	0.011691	0.128287	Fam113a
ENSMUSG00000040463	-0.354388	0.140565	-2.52116	0.0116967	0.128287	Mybbp1a
ENSMUSG00000047090	0.733232	0.290669	2.52257	0.0116501	0.128287	Tmem198b
ENSMUSG00000053293	0.257439	0.102026	2.52326	0.0116274	0.128287	Pom121
ENSMUSG00000054604	0.419678	0.166323	2.52328	0.0116267	0.128287	Cggbp1
ENSMUSG00000055917	-0.586068	0.232362	-2.52222	0.0116615	0.128287	Zfp277
ENSMUSG00000075271	-0.821676	0.325866	-2.52152	0.0116849	0.128287	Ttc30a1
ENSMUSG00000083420	-1.62454	0.644234	-2.52167	0.01168	0.128287	Gm15665
ENSMUSG00000028282	-0.580347	0.230226	-2.52077	0.0117098	0.128312	Casp8ap2
ENSMUSG00000077276	-1.75321	0.695685	-2.52012	0.0117314	0.128468
ENSMUSG00000074860	-0.620463	0.246249	-2.51966	0.0117469	0.128558	Gm10778
ENSMUSG00000014837	-0.233117	0.0925301	-2.51936	0.0117567	0.128586	4931428F04Rik
ENSMUSG00000025078	-0.323775	0.128529	-2.51908	0.0117662	0.128609	Nhlrc2
ENSMUSG00000026670	-0.351137	0.139436	-2.51827	0.0117934	0.128776	Uap1
ENSMUSG00000035770	0.213217	0.0846707	2.51819	0.0117961	0.128776	Dync1li2
ENSMUSG00000019795	0.255147	0.101364	2.51714	0.0118313	0.12908	Pcmt1
ENSMUSG00000074345	-0.865936	0.344145	-2.51619	0.011863	0.129346	Tnfaip8l3
ENSMUSG00000032743	0.317451	0.126203	2.51539	0.01189	0.129424	D430042O09Rik
ENSMUSG00000039501	-0.238009	0.0946235	-2.51532	0.0118923	0.129424	Znfx1
ENSMUSG00000040860	0.706259	0.280751	2.5156	0.011883	0.129424	Crocc
ENSMUSG00000047635	0.326997	0.130015	2.51508	0.0119004	0.129433	2810006K23Rik
ENSMUSG00000036422	0.647959	0.257654	2.51484	0.0119085	0.129441	Pcdh8
ENSMUSG00000034664	0.722389	0.287497	2.51268	0.0119818	0.130157	Itga2b
ENSMUSG00000018906	-0.349331	0.139081	-2.51171	0.0120149	0.130286	P4ha2
ENSMUSG00000028273	-0.8062	0.320981	-2.51168	0.0120159	0.130286	Pdlim5
ENSMUSG00000068154	0.629426	0.250599	2.51169	0.0120155	0.130286	Insm1
ENSMUSG00000016528	0.503993	0.200804	2.50987	0.0120774	0.130792	Mapkapk2
ENSMUSG00000086331	-1.09362	0.435725	-2.50988	0.0120772	0.130792	Gm16310
ENSMUSG00000089809	-0.512855	0.204398	-2.5091	0.0121038	0.130997	A930011G23Rik
ENSMUSG00000030519	-0.205579	0.081942	-2.50884	0.0121128	0.131014	Apba2
ENSMUSG00000024151	0.362583	0.144553	2.50831	0.0121309	0.131048	Msh2
ENSMUSG00000041096	0.298101	0.11885	2.50822	0.0121343	0.131048	Tspyl2
ENSMUSG00000042389	-0.389637	0.155352	-2.5081	0.0121383	0.131048	Tsen2
ENSMUSG00000016356	0.767207	0.306092	2.50646	0.0121947	0.131576	Col20a1
ENSMUSG00000037224	-0.49675	0.198231	-2.50592	0.0122134	0.131697	Zfyve28
ENSMUSG00000018362	0.247056	0.0986325	2.50481	0.0122516	0.131747	Kpna2
ENSMUSG00000030525	-0.505273	0.201765	-2.50427	0.0122705	0.131747	Chrna7
ENSMUSG00000031442	0.247563	0.0988462	2.50453	0.0122615	0.131747	Mcf2l
ENSMUSG00000035671	0.441536	0.176312	2.50429	0.0122697	0.131747	Zswim4
ENSMUSG00000037712	0.386211	0.154173	2.50505	0.0122433	0.131747	Fermt2
ENSMUSG00000071708	-0.306883	0.122527	-2.50462	0.0122583	0.131747	Sms
ENSMUSG00000071708	-0.306883	0.122527	-2.50462	0.0122583	0.131747	Sms
ENSMUSG00000090698	0.685665	0.2737	2.50517	0.0122394	0.131747	Apold1
ENSMUSG00000025137	0.473188	0.189066	2.50277	0.0123226	0.132022	Pcyt2
ENSMUSG00000026869	0.270071	0.107913	2.50267	0.0123262	0.132022	Psmd5
ENSMUSG00000044505	1.28688	0.514102	2.50316	0.012309	0.132022	Lingo4
ENSMUSG00000071984	-0.749569	0.299458	-2.50308	0.0123116	0.132022	Fndc1
ENSMUSG00000026784	-0.361065	0.144344	-2.50142	0.0123697	0.132166	Pdss1
ENSMUSG00000032741	0.496163	0.19835	2.50146	0.0123684	0.132166	Tpcn1
ENSMUSG00000053164	-0.648581	0.259234	-2.50191	0.0123524	0.132166	Gpr21
ENSMUSG00000089714	0.561067	0.224261	2.50185	0.0123547	0.132166	Gm16092
ENSMUSG00000070866	-0.549105	0.219546	-2.50109	0.012381	0.132207	Zfp804a
ENSMUSG00000028826	0.308588	0.123456	2.49958	0.0124341	0.132693	Tmem57
ENSMUSG00000024378	0.872705	0.349363	2.49799	0.0124901	0.13321	Stard4
ENSMUSG00000029767	0.330859	0.132506	2.49693	0.0125275	0.133528	Calu
ENSMUSG00000087301	1.4375	0.575774	2.49665	0.0125374	0.133553	Gm13629
ENSMUSG00000052372	-0.650262	0.260507	-2.49614	0.0125553	0.133662	Il1rapl1
ENSMUSG00000061911	0.332787	0.133404	2.49458	0.0126105	0.134169	Myt1l
ENSMUSG00000022438	0.41688	0.167179	2.49362	0.0126448	0.134452	Parvb
ENSMUSG00000038524	0.301575	0.120999	2.49236	0.0126896	0.134847	Fchsd1
ENSMUSG00000022248	-0.494547	0.198543	-2.49088	0.0127428	0.135331	Rad1
ENSMUSG00000039782	0.36572	0.146847	2.49048	0.0127569	0.135399	Cpeb2
ENSMUSG00000002233	-0.543702	0.218415	-2.48931	0.0127991	0.135765	Rhoc
ENSMUSG00000093000	-0.682314	0.274195	-2.48842	0.0128311	0.136023
ENSMUSG00000007617	0.781678	0.314263	2.48733	0.0128705	0.136357	Homer1
ENSMUSG00000028364	-0.860058	0.345835	-2.4869	0.0128861	0.136441	Tnc
ENSMUSG00000039357	0.290264	0.116762	2.48595	0.0129207	0.136642	Fut11
ENSMUSG00000039809	-0.336978	0.135544	-2.48611	0.0129148	0.136642	Gabbr2
ENSMUSG00000029248	0.613794	0.246943	2.48557	0.0129343	0.136671	1700023E05Rik
ENSMUSG00000074264	0.392727	0.158011	2.48544	0.012939	0.136671	Amy1
ENSMUSG00000036208	-0.614359	0.24728	-2.48447	0.0129746	0.136965	BC027231
ENSMUSG00000057858	0.328521	0.132259	2.48393	0.0129941	0.137088	D19Ertd737e
ENSMUSG00000027803	-0.82011	0.330258	-2.48324	0.0130193	0.137272	Wwtr1
ENSMUSG00000006269	1.65932	0.668294	2.48292	0.0130312	0.137315	Atp6v1b1
ENSMUSG00000006134	0.284421	0.114622	2.48137	0.0130878	0.137665	Crkl
ENSMUSG00000020375	0.295213	0.11897	2.4814	0.0130866	0.137665	Rufy1
ENSMUSG00000041153	-0.701922	0.282837	-2.48172	0.0130749	0.137665	Osgin2
ENSMUSG00000028709	0.643649	0.25956	2.47977	0.0131466	0.138201	Mob3c
ENSMUSG00000062040	-0.471065	0.189998	-2.47932	0.0131635	0.138295	Zfp27
ENSMUSG00000020184	0.255465	0.103077	2.4784	0.0131974	0.138569	Mdm2
ENSMUSG00000036430	0.741199	0.299129	2.47785	0.0132175	0.138697	Tbcc
ENSMUSG00000028906	0.353012	0.142496	2.47735	0.0132363	0.138811	Epb4.1
ENSMUSG00000048600	0.492624	0.198994	2.47557	0.0133022	0.139396	Gm5763
ENSMUSG00000075020	-0.858863	0.346956	-2.47542	0.0133079	0.139396	E530001K10Rik
ENSMUSG00000032198	0.499569	0.201867	2.47475	0.0133329	0.139575	Dock6
ENSMUSG00000024352	-0.503618	0.203566	-2.47397	0.0133619	0.139712	Spata24
ENSMUSG00000049872	-1.81743	0.734583	-2.4741	0.0133572	0.139712	Fam26e
ENSMUSG00000054123	-1.00842	0.407906	-2.47219	0.0134288	0.140328	Gm9936
ENSMUSG00000024140	-0.981974	0.397269	-2.47181	0.013443	0.140393	Epas1
ENSMUSG00000060671	0.449091	0.181712	2.47144	0.013457	0.140456	Atp8b2
ENSMUSG00000075585	-0.50951	0.206202	-2.47093	0.0134764	0.140491	6330403L08Rik
ENSMUSG00000085899	-1.7029	0.689167	-2.47095	0.0134754	0.140491	Gm15338
ENSMUSG00000025220	0.338299	0.136999	2.46935	0.0135359	0.140861	Mgea5
ENSMUSG00000033208	-1.1388	0.46115	-2.46948	0.013531	0.140861	S100b
ENSMUSG00000056018	-1.97563	0.799966	-2.46965	0.0135246	0.140861	1700008F21Rik
ENSMUSG00000019916	-0.52276	0.211743	-2.46884	0.0135551	0.140978	P4ha1
ENSMUSG00000092180	-0.695325	0.281715	-2.46818	0.0135801	0.141155	Gm20505
ENSMUSG00000028845	1.22238	0.495443	2.46725	0.0136155	0.141371	Tekt2
ENSMUSG00000092537	-0.844653	0.342352	-2.46721	0.0136171	0.141371	Gm20504
ENSMUSG00000079406	-0.605695	0.245577	-2.46642	0.0136472	0.1416	Gm1973
ENSMUSG00000079406	-0.605695	0.245577	-2.46642	0.0136472	0.1416	Gm1973
ENSMUSG00000079406	-0.605695	0.245577	-2.46642	0.0136472	0.1416	Gm1973
ENSMUSG00000079406	-0.605695	0.245577	-2.46642	0.0136472	0.1416	Gm1973
ENSMUSG00000079406	-0.605695	0.245577	-2.46642	0.0136472	0.1416	Gm1973
ENSMUSG00000021798	0.46316	0.187835	2.46578	0.0136717	0.141771	Ldb3
ENSMUSG00000040957	-0.711504	0.288657	-2.46488	0.0137061	0.142044	Cables1
ENSMUSG00000043015	-0.622936	0.252785	-2.4643	0.0137282	0.14219	Tmem194b
ENSMUSG00000030747	0.476054	0.193255	2.46334	0.0137649	0.14245	Dgat2
ENSMUSG00000050105	0.879539	0.357069	2.46322	0.0137696	0.14245	Grrp1
ENSMUSG00000038618	-1.07145	0.435094	-2.46257	0.0137946	0.142535	Rassf7
ENSMUSG00000054871	-0.532422	0.216198	-2.46266	0.0137912	0.142535	Tmem158
ENSMUSG00000068373	-0.228865	0.0929447	-2.46237	0.013802	0.142535	D430041D05Rik
ENSMUSG00000004347	-0.954726	0.388066	-2.46022	0.0138854	0.143098	Pde1c
ENSMUSG00000026333	-0.646147	0.262632	-2.46027	0.0138831	0.143098	Gin1
ENSMUSG00000042632	0.386688	0.157183	2.46012	0.0138891	0.143098	Pla2g6
ENSMUSG00000067780	-0.777086	0.31585	-2.4603	0.0138822	0.143098	Pi15
ENSMUSG00000026283	0.379397	0.15424	2.45977	0.0139025	0.143152	Ing5
ENSMUSG00000028657	0.329773	0.134132	2.45857	0.013949	0.143295	Ppt1
ENSMUSG00000030055	0.26676	0.108476	2.45915	0.0139265	0.143295	Rab43
ENSMUSG00000034781	0.249886	0.101635	2.45865	0.0139459	0.143295	Gna11
ENSMUSG00000084890	-0.578887	0.23544	-2.45874	0.0139424	0.143295	A830036E02Rik
ENSMUSG00000031139	0.544752	0.221666	2.45753	0.0139895	0.143627	Mcf2
ENSMUSG00000025268	0.2644	0.107628	2.4566	0.0140258	0.143916	Maged2
ENSMUSG00000002308	0.39509	0.160884	2.45574	0.0140595	0.143996	Cd320
ENSMUSG00000020423	0.795266	0.323863	2.45556	0.0140664	0.143996	Btg2
ENSMUSG00000031963	-0.866588	0.352881	-2.45575	0.014059	0.143996	Bmper
ENSMUSG00000087471	-0.797348	0.32469	-2.45572	0.0140604	0.143996	Gm16836
ENSMUSG00000021457	-0.864786	0.352221	-2.45524	0.0140792	0.144043	Syk
ENSMUSG00000028128	0.804996	0.327918	2.45487	0.0140937	0.144082	F3
ENSMUSG00000042156	0.261895	0.10673	2.45381	0.0141352	0.144082	Dzip1
ENSMUSG00000042726	0.288002	0.117347	2.45427	0.0141171	0.144082	Trafd1
ENSMUSG00000042874	1.22028	0.497328	2.45368	0.0141403	0.144082	D930007J09Rik
ENSMUSG00000047414	-0.557678	0.227268	-2.45383	0.0141342	0.144082	Flrt2
ENSMUSG00000068036	-0.273596	0.1115	-2.45377	0.0141369	0.144082	Mllt4
ENSMUSG00000087269	-0.634662	0.258553	-2.45466	0.0141016	0.144082	D330023K18Rik
ENSMUSG00000029484	0.789099	0.321749	2.45253	0.0141855	0.144459	Anxa3
ENSMUSG00000029405	0.27953	0.114015	2.45169	0.0142188	0.144613	G3bp2
ENSMUSG00000030583	-0.370652	0.151174	-2.45182	0.0142137	0.144613	Sipa1l3
ENSMUSG00000081208	-1.00003	0.40792	-2.45152	0.0142253	0.144613	Gm11400
ENSMUSG00000024912	0.971582	0.396412	2.45094	0.0142484	0.144733	Fosl1
ENSMUSG00000085704	0.637708	0.260203	2.45081	0.0142536	0.144733	4921531C22Rik
ENSMUSG00000044712	-0.587768	0.23988	-2.45026	0.0142751	0.144785	Slc38a6
ENSMUSG00000074903	0.403554	0.164688	2.45042	0.0142691	0.144785	Gm2058
ENSMUSG00000001520	0.930471	0.379839	2.44965	0.0142996	0.144949	Nrip2
ENSMUSG00000025195	-0.441799	0.180405	-2.44893	0.0143282	0.144989	Dnmbp
ENSMUSG00000048280	-0.557045	0.227435	-2.44925	0.0143152	0.144989	Zfp738
ENSMUSG00000049742	-1.06531	0.43501	-2.44893	0.014328	0.144989	C330006D17Rik
ENSMUSG00000004500	-0.478234	0.195307	-2.44862	0.0143403	0.145028	Zfp324
ENSMUSG00000083282	0.354761	0.144914	2.44808	0.0143619	0.145162	Ctsf
ENSMUSG00000020956	0.39502	0.161441	2.44684	0.0144114	0.145579	6530401N04Rik
ENSMUSG00000058361	-0.714097	0.291927	-2.44615	0.0144392	0.145776	Lhfpl3
ENSMUSG00000027806	0.375529	0.153533	2.44591	0.0144485	0.145787	Tsc22d2
ENSMUSG00000039632	0.493076	0.201669	2.44497	0.0144863	0.146084	Ccdc151
ENSMUSG00000053985	-0.651469	0.266536	-2.4442	0.0145173	0.146313	Zfp14
ENSMUSG00000026867	0.162381	0.0664472	2.44377	0.0145349	0.146406	Gapvd1
ENSMUSG00000026078	0.304725	0.124719	2.4433	0.0145535	0.14651	Pdcl3
ENSMUSG00000027777	-0.300328	0.122933	-2.44302	0.0145651	0.146543	Schip1
ENSMUSG00000027777	-0.300328	0.122933	-2.44302	0.0145651	0.146543	Schip1
ENSMUSG00000027180	0.299052	0.122424	2.44276	0.0145755	0.146564	Fbxo3
ENSMUSG00000027669	-0.50565	0.207076	-2.44185	0.0146121	0.146847	Gnb4
ENSMUSG00000023011	0.363143	0.148736	2.44153	0.0146253	0.146866	Faim2
ENSMUSG00000060477	-0.565913	0.231799	-2.4414	0.0146306	0.146866	Irak2
ENSMUSG00000090678	-1.19824	0.491005	-2.44038	0.0146718	0.147195	6030442K20Rik
ENSMUSG00000031885	0.480815	0.197061	2.43993	0.0146901	0.147295	Cbfb
ENSMUSG00000020151	-0.428329	0.175643	-2.43864	0.0147428	0.147739	Ptprr
ENSMUSG00000058761	-0.431283	0.176873	-2.43839	0.014753	0.147757	Rnf169
ENSMUSG00000017802	0.280284	0.114958	2.43815	0.0147627	0.147769	Fam134c
ENSMUSG00000035891	0.275781	0.113131	2.43771	0.0147807	0.147866	Cerk
ENSMUSG00000058192	-0.454117	0.186312	-2.43741	0.0147931	0.147906	Zfp846
ENSMUSG00000009112	0.273261	0.112126	2.4371	0.0148057	0.147948	Bcl2l13
ENSMUSG00000034928	-0.189641	0.0778328	-2.43652	0.0148294	0.1481	Rnf44
ENSMUSG00000034910	0.285467	0.117209	2.43555	0.0148693	0.148415	Pygo1
ENSMUSG00000091186	-0.731888	0.300681	-2.4341	0.0149289	0.14884	Gm2078
ENSMUSG00000093507	0.984745	0.404532	2.43428	0.0149213	0.14884
ENSMUSG00000030763	0.310613	0.12763	2.4337	0.0149452	0.148919	Lcmt1
ENSMUSG00000000416	-0.600264	0.24682	-2.43199	0.0150161	0.149425	Cttnbp2
ENSMUSG00000021039	-0.218782	0.089958	-2.43205	0.0150137	0.149425	Snw1
ENSMUSG00000063297	-0.658817	0.270911	-2.43186	0.0150215	0.149425	Luzp2
ENSMUSG00000025743	-0.18098	0.0744392	-2.43124	0.0150472	0.14951	Sdc3
ENSMUSG00000026514	-0.389896	0.160382	-2.43104	0.0150556	0.14951	Cnih3
ENSMUSG00000074664	-0.713435	0.293467	-2.43106	0.0150547	0.14951	A830092H15Rik
ENSMUSG00000042496	-0.626864	0.257929	-2.43038	0.0150831	0.149699	Prdm10
ENSMUSG00000022130	-0.611481	0.251639	-2.43	0.0150989	0.149771	Tgds
ENSMUSG00000017774	-0.24386	0.100429	-2.42819	0.0151744	0.150363	Myo1c
ENSMUSG00000027011	-0.32447	0.133628	-2.42816	0.0151756	0.150363	Ube2e3
ENSMUSG00000052949	0.257452	0.10604	2.42789	0.0151869	0.15039	Rnf157
ENSMUSG00000019863	-0.365215	0.150441	-2.42763	0.015198	0.150414	Qrsl1
ENSMUSG00000091577	-1.49453	0.615715	-2.42731	0.0152113	0.150462	Gm6211
ENSMUSG00000059851	0.460371	0.189686	2.42702	0.0152233	0.150496	Suv420h2
ENSMUSG00000029108	-0.26473	0.109106	-2.42636	0.0152511	0.150601	Pcdh7
ENSMUSG00000032038	-0.377807	0.155701	-2.4265	0.0152454	0.150601	St3gal4
ENSMUSG00000060397	-0.7936	0.327147	-2.42582	0.0152738	0.15074	Zfp128
ENSMUSG00000078582	-1.21464	0.500807	-2.42537	0.0152928	0.150759	Hivep3
ENSMUSG00000091209	-0.501519	0.206772	-2.42547	0.0152885	0.150759	Gm3264
ENSMUSG00000091209	-0.501519	0.206772	-2.42547	0.0152885	0.150759	Gm3264
ENSMUSG00000091209	-0.501519	0.206772	-2.42547	0.0152885	0.150759	Gm3264
ENSMUSG00000091209	-0.501519	0.206772	-2.42547	0.0152885	0.150759	Gm3264
ENSMUSG00000091209	-0.501519	0.206772	-2.42547	0.0152885	0.150759	Gm3264
ENSMUSG00000091209	-0.501519	0.206772	-2.42547	0.0152885	0.150759	Gm3264
ENSMUSG00000001098	0.233433	0.0963025	2.42396	0.0153524	0.151262	Kctd10
ENSMUSG00000078786	0.300915	0.124197	2.42288	0.0153978	0.151625	BC024978
ENSMUSG00000029467	-0.280642	0.115857	-2.4223	0.0154226	0.151783	Atp2a2
ENSMUSG00000000142	-0.54318	0.224291	-2.42176	0.0154454	0.151923	Axin2
ENSMUSG00000034194	0.185997	0.0768156	2.42134	0.0154632	0.152013	R3hcc1
ENSMUSG00000027820	-0.824746	0.340783	-2.42015	0.015514	0.152409	Mme
ENSMUSG00000032291	-0.760236	0.314148	-2.41999	0.0155209	0.152409	Crabp1
ENSMUSG00000020186	-0.491966	0.203591	-2.41644	0.0156731	0.153508	Csrp2
ENSMUSG00000021640	0.764745	0.316474	2.41645	0.0156726	0.153508	Naip1
ENSMUSG00000031762	0.893493	0.369706	2.41676	0.0156592	0.153508	Mt2
ENSMUSG00000034903	-0.660292	0.27335	-2.41555	0.0157113	0.153508	Cobll1
ENSMUSG00000036181	0.745228	0.3084	2.41643	0.0156733	0.153508	Hist1h1c
ENSMUSG00000038160	0.247635	0.102516	2.41557	0.0157104	0.153508	Atg5
ENSMUSG00000043384	0.363381	0.150418	2.41581	0.0157003	0.153508	Gprasp1
ENSMUSG00000055240	-0.539939	0.223487	-2.41598	0.0156931	0.153508	Zfp101
ENSMUSG00000084544	-1.69545	0.701703	-2.41619	0.0156839	0.153508
ENSMUSG00000036707	0.24043	0.0995484	2.41521	0.0157263	0.153569	Cab39
ENSMUSG00000018334	-0.472131	0.195514	-2.41482	0.0157432	0.153649	Ksr1
ENSMUSG00000021972	-0.421716	0.174808	-2.41245	0.0158455	0.154562	Hmbox1
ENSMUSG00000039021	1.13586	0.470961	2.41179	0.0158744	0.154758	Ttc16
ENSMUSG00000000711	0.326968	0.135636	2.41063	0.0159251	0.155044	Rab5b
ENSMUSG00000031104	0.396425	0.164467	2.41037	0.0159364	0.155044	Rab33a
ENSMUSG00000053166	-0.615142	0.255213	-2.41031	0.015939	0.155044	Cdh22
ENSMUSG00000053980	-1.47395	0.611502	-2.41037	0.0159364	0.155044	Gm9930
ENSMUSG00000055116	-0.444792	0.18459	-2.40962	0.0159691	0.155251	Arntl
ENSMUSG00000031821	0.655493	0.272107	2.40895	0.0159983	0.155319	Gins2
ENSMUSG00000042097	-0.711359	0.295267	-2.40921	0.0159872	0.155319	Zfp239
ENSMUSG00000085560	1.20656	0.500886	2.40886	0.0160026	0.155319	C230038L03Rik
ENSMUSG00000066724	-0.695659	0.288881	-2.40812	0.0160351	0.155463	Gm10175
ENSMUSG00000085586	0.550429	0.228556	2.40828	0.0160277	0.155463	Gm11613
ENSMUSG00000025582	-0.882433	0.366536	-2.40749	0.0160626	0.155643	Nptx1
ENSMUSG00000034893	-0.328141	0.136331	-2.40695	0.0160862	0.155786	Cog3
ENSMUSG00000060814	-1.77327	0.737133	-2.40563	0.0161448	0.156268	Gm4980
ENSMUSG00000029552	-0.428379	0.178208	-2.40381	0.0162253	0.15696	Tes
ENSMUSG00000020593	0.671738	0.279531	2.40309	0.016257	0.15718	Lpin1
ENSMUSG00000021470	-0.490331	0.204198	-2.40125	0.016339	0.157627	0610007P08Rik
ENSMUSG00000032679	0.645872	0.268934	2.4016	0.0163233	0.157627	Cd59a
ENSMUSG00000039662	0.23405	0.0974565	2.40158	0.0163244	0.157627	Icmt
ENSMUSG00000074283	-0.793591	0.330487	-2.40128	0.016338	0.157627	Zfp109
ENSMUSG00000038602	-0.471378	0.196374	-2.4004	0.0163771	0.157908	Slc35f1
ENSMUSG00000027793	0.927558	0.386487	2.39997	0.0163964	0.157933	Ccna1
ENSMUSG00000057649	0.227143	0.0946451	2.39994	0.0163977	0.157933	Brd9
ENSMUSG00000025981	0.50422	0.210136	2.39949	0.016418	0.158042	Coq10b
ENSMUSG00000047793	0.744964	0.310628	2.39825	0.0164736	0.158491	Sned1
ENSMUSG00000042256	-0.678049	0.282901	-2.39677	0.0165403	0.159045	3110082D06Rik
ENSMUSG00000025404	-0.488911	0.204008	-2.39653	0.0165512	0.159063	R3hdm2
ENSMUSG00000033991	-0.325478	0.135839	-2.39605	0.0165729	0.159185	Ttc37
ENSMUSG00000026094	-1.21434	0.506856	-2.39583	0.0165826	0.159191	Stk17b
ENSMUSG00000022816	-0.632029	0.264006	-2.394	0.0166658	0.159815	Fstl1
ENSMUSG00000023066	-0.550517	0.229948	-2.39409	0.0166615	0.159815	Rttn
ENSMUSG00000022021	0.479229	0.200219	2.39353	0.0166872	0.159933	Diap3
ENSMUSG00000021036	0.239905	0.100251	2.39305	0.0167092	0.160057	Sptlc2
ENSMUSG00000004328	-0.643024	0.268773	-2.39244	0.0167366	0.160232	Hif3a
ENSMUSG00000081179	0.628534	0.262739	2.39223	0.0167463	0.160237	Gm13136
ENSMUSG00000081291	-0.691895	0.289364	-2.39109	0.0167985	0.160565	Gm14738
ENSMUSG00000085176	-1.76939	0.739996	-2.39108	0.0167988	0.160565	Gm15397
ENSMUSG00000091529	-0.583568	0.24409	-2.3908	0.0168119	0.160603	Gm3485
ENSMUSG00000031452	-1.75025	0.732519	-2.38936	0.0168779	0.161103	1700029H14Rik
ENSMUSG00000049624	0.31239	0.130759	2.38906	0.0168917	0.161103	Slc17a5
ENSMUSG00000085125	0.950878	0.397984	2.38924	0.0168833	0.161103	Gm16070
ENSMUSG00000032624	0.370542	0.155148	2.38831	0.0169261	0.161344	Eml4
ENSMUSG00000035596	0.242321	0.101471	2.38808	0.0169368	0.161358	Mboat7
ENSMUSG00000031103	-1.10865	0.464353	-2.38751	0.016963	0.161433	Elf4
ENSMUSG00000071286	0.481105	0.201499	2.38763	0.0169574	0.161433	Sowahc
ENSMUSG00000056019	-0.6745	0.282566	-2.38706	0.0169839	0.161545	Zfp709
ENSMUSG00000033774	-1.08565	0.454881	-2.38666	0.0170022	0.161631	Npbwr1
ENSMUSG00000031667	0.25333	0.106155	2.38643	0.017013	0.161647	Aktip
ENSMUSG00000051627	0.329511	0.13809	2.3862	0.0170233	0.161657	Hist1h1e
ENSMUSG00000032342	-0.284768	0.119361	-2.38577	0.0170436	0.161683	Mto1
ENSMUSG00000070814	-0.410719	0.172169	-2.38555	0.0170536	0.161683	6330408A02Rik
ENSMUSG00000093577	1.06288	0.445526	2.38567	0.0170483	0.161683
ENSMUSG00000025221	-0.457305	0.191838	-2.38381	0.0171343	0.162186	Kcnip2
ENSMUSG00000054967	-0.725384	0.304291	-2.38385	0.0171326	0.162186	Zfp647
ENSMUSG00000086386	1.02616	0.430462	2.38386	0.0171321	0.162186	Gm12108
ENSMUSG00000037876	-0.451748	0.189547	-2.3833	0.0171582	0.162324	Jmjd1c
ENSMUSG00000022814	-0.275596	0.115689	-2.38222	0.0172088	0.162715	Umps
ENSMUSG00000061232	0.879153	0.369134	2.38167	0.0172345	0.162871	H2-K1
ENSMUSG00000022887	0.558677	0.234669	2.3807	0.0172799	0.163174	Masp1
ENSMUSG00000034282	0.941722	0.395584	2.38059	0.0172851	0.163174	Evpl
ENSMUSG00000032965	-0.349774	0.146947	-2.38027	0.0172998	0.163225	Ift57
ENSMUSG00000023330	-0.671724	0.282346	-2.37908	0.0173559	0.163555	Dtwd1
ENSMUSG00000030613	-0.617832	0.259705	-2.37898	0.0173607	0.163555	Ccdc90b
ENSMUSG00000041220	0.43493	0.182825	2.37894	0.0173627	0.163555	Elovl6
ENSMUSG00000035722	0.54355	0.228581	2.37793	0.0174101	0.163914	Abca7
ENSMUSG00000059552	-0.325141	0.136756	-2.37753	0.0174289	0.164003	Trp53
ENSMUSG00000026678	0.676142	0.284443	2.37708	0.0174504	0.164118	Rgs5
ENSMUSG00000090707	-0.516179	0.21723	-2.37618	0.0174929	0.16443	Gm8237
[truncated: 29,365 more rows]
