# Supplementary figures and images for: Cohesin-dependence of neuronal gene expression relates to chromatin loop length
Source: eLife journal article supplement (doi:10.7554/elife.76539), 2022-04-26

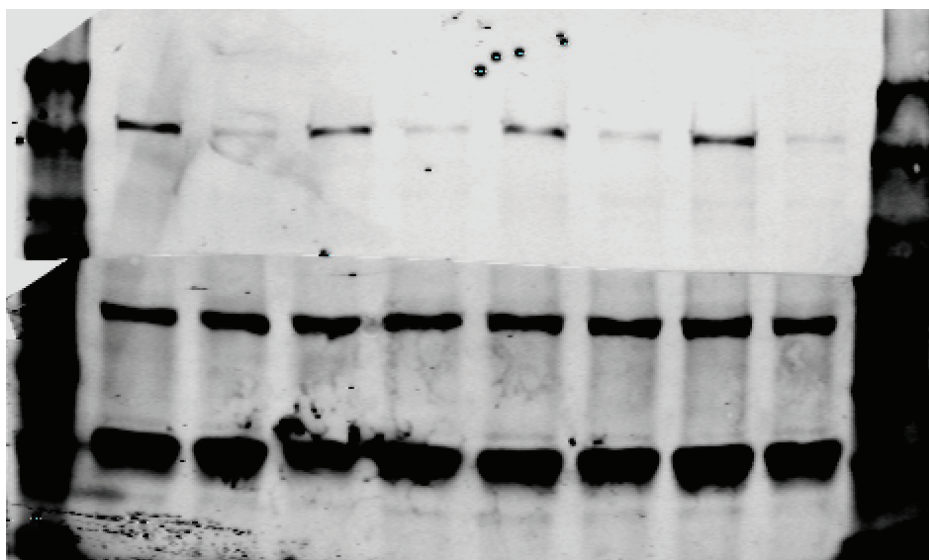

Supplement: supp [file elife-76539-supp-v1.zip]

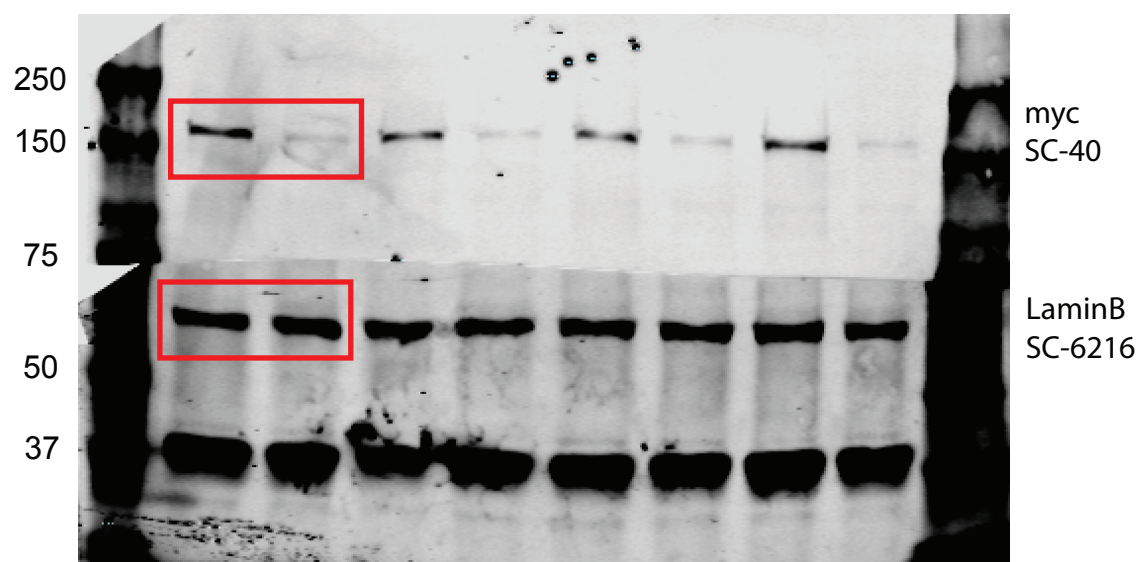

Supplement: supp [file elife-76539-supp-v1.zip]

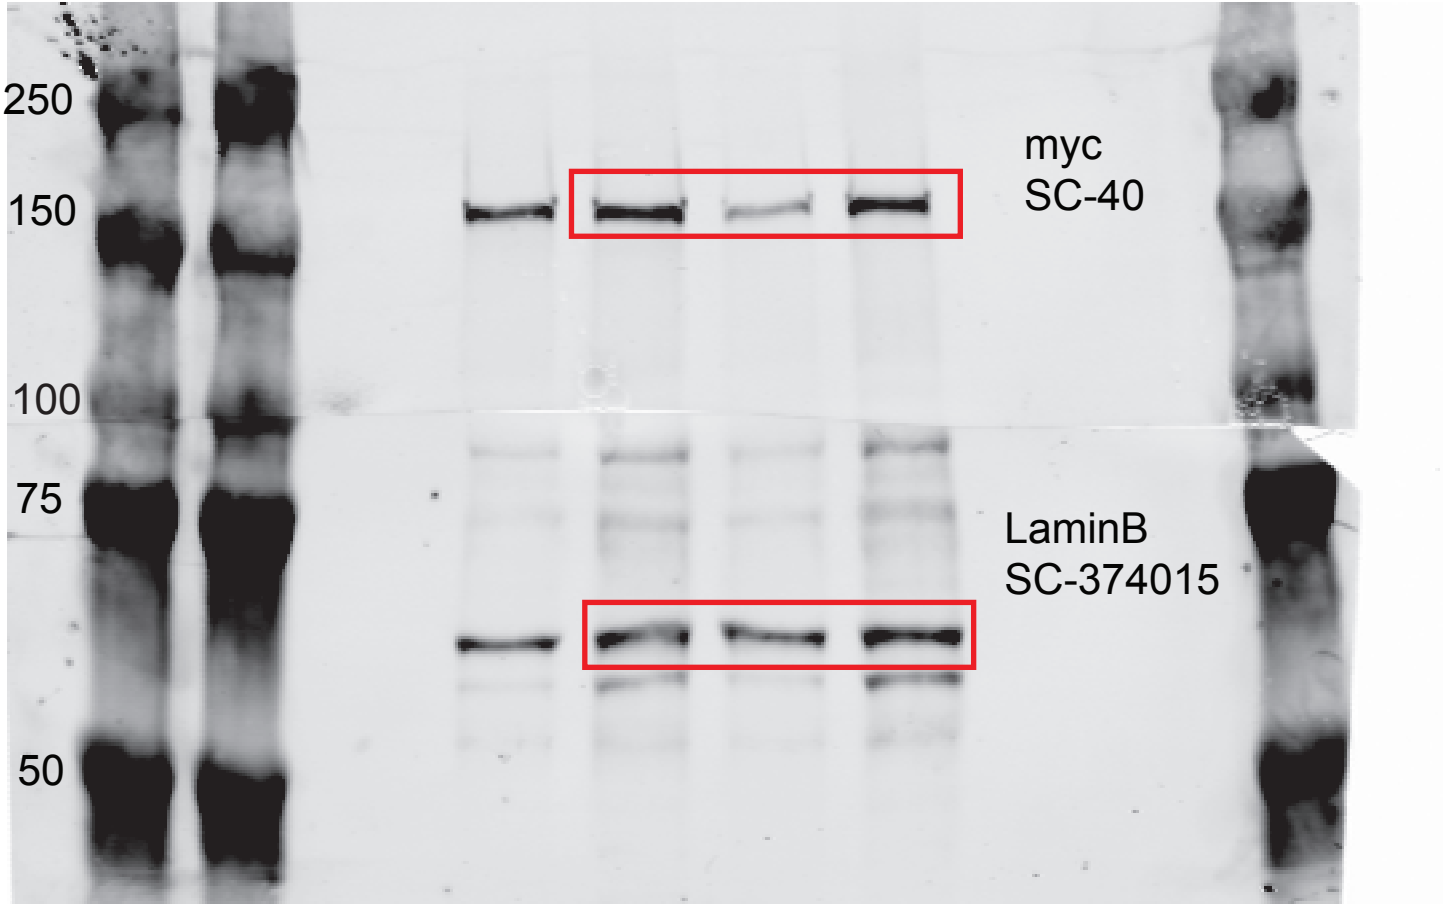

Supplement: supp [file elife-76539-supp-v1.zip]
